# Supplementary material for: MITF reprograms the extracellular matrix and focal adhesion in melanoma
Source: eLife. 2021 Jan 13;10:e63093. doi: 10.7554/eLife.63093 (PMC7857731; doi:10.7554/eLife.63093)
Supplement: Figure 1—source data 1. [file elife-63093-fig1-data1.xlsx]

## Sheet: Sheet1
Figure 1g	cell size measure
	EV-SKMEL28	MITF-X2	MITF-X6
	4373	23766	13459
	6276	5084	11897
	4134	10307	6578
	3194	11709	10044
	3666	7765	12552
	4994	5936	11835
	1887	7664	6848
	2792	14409	12769
	7279	9364	5699
	4592	15484	3944
	3358	9198	5846
	4610	7195	4607
	3914	7824	2734
	2639	6213	9170
	3073	10715	6068
	2192	8832	5989
	4625	11877	5264
	6035	2940	6875
	3449	5178	9286
	5038	6355	7452
	5934	7448	8307
	5748	7251	10463
	3439	7149	5155
	3931	7793	6605
	6886	5484	6186
	3778	3325	12429
	5990	6855	7997
	4806	7231	8320
	3992	5024	8008
	7338	4858	7253
	3894	6437	8780
	6073	8311	6798
	4893	5688	12369
	14374	6111	3366
	7324	8919	4871
	3988	8440	9185
	3208	5699	4945
	5444	9671	3021
	6778	8911	4444
	4304	10141	10035
	4203	11626	6694
	6395	5430	9408
	2647	5430	9152
	3170	6900	6824
	4923	3570	6856
	6161	5460	9679
	3440	11524	6674
	5020	25384	2963
	4971	7486	6940
	4133	20024	8479
	5575	10741	6778
	4303	13878	10722
	2355	5681	4801
	3971	4554	7324
	3452	12858	10031
	4967	6800	4249
	4049	5533	16403
	3424	6905	8289
	5706	9095	11021
	3246	16001	8576
	4121	8234	6535
	2994	7604	7012
	5590	5460	8504
	4059	10437	5825
	4721	7332	7467
	6514	10968	5200
	5545	8597	4574
	4241	6023	11743
	5301	6612	6974
	3152	6413	9936
	4161	5190	6779
	4122	9101	5207
	3831	7712	11574
	5282	4848	9932
	3271	6119	7836
	3512	11242	10878
	4344	8265	8407
	4647	3317	9143
	4186	3527	8486
	4816	7782	11307
	6848	2978	15105
	5076	3335	8220
	3187	4860	7883
	7834	5264	9270
	4598	3887	11192
	11695	25804	21990
	8075	12073	9293
	7994	9294	16012
	8257	6111	10865
	6534	15814	15879
	9975	12821	13217
	11382	14783	12477
	5591	7503	20747
	9001	9103	8581
	9146	16598	10819
	11695	10953	10531
	8075	6297	13206
	7994	8984	8690
	8257	10071	11488
	6534	25405	11613
	9975	9155	9011
	11382	6738	9844
	5591	5809	8823
	9001	10867	6259
	9146	12704	8305
	5946	7189	9009
	8367	9133	11282
	10067	6263	14206
	4963	9630	12396
	8115	7251	6991
	7471	5768	14334
	4164	27286	7193
	4647	21799	7482
	6415	15729	10206
	13361	7486	7556
	10300	9200	6099
	6304	16215	12734
	11579	6362	11315
	5602	7326	9105
	7333	9377	7803
	9302	8391	7036
	5201	8016	8295
	6105	9537	9072
	6314	10251	9261
	8686	15978	12689
	7484	19383	16274
	7036	10678	15812
	8854	13428	13307
	8886	11664	11774
	7858	12543	13349
	8743	12450	25179
	7683	21252	14181
	8704	7357	12708
	5822	7797	14047
	8638	5335	11798
	9271	5943	14536
	6077	7202	9773
	9277	9058	9505
	7443	5153	8186
	4964	8817	5920
	8698	11104	7075
	6024	11332	10594
	3433	12103	10414
	6434	9279	8431
	9634	9884	11989
	6261	11594	11213
	5287	12088	23605
	7616	9944	11023
	5654	5581	7327
	5588	8164	23011
	8958	11896	13879
	7782	10911	20492
	13712	9091	20798
	7447	9482	6222
	7629	9618	11943
	8859	11047	22793
	4072	13767	18709
	6677	12756	15697
	8306	11580	5007
	7324	15413	5753
	4478	10910	10730
	6883	26076	20856
	4398	8886	10604
	8922	9579	16446
	7522	12694	18078
	8087	6458	6778
	6409	5879	9791
	4523	9580	15520
	7152	6132	7770
	9815	11492	7508
	5577	13096	6393
	8225	6655	7320
	4482	14005	28928
	6287	12204	8550
	7404	11649	25571
	6137	10059	9721
	7172	8586	11501
	5526	7009	7876
	4976	7465	10859
	18118	13466	12161
	5415	12337	10771
	10715	11381	6086
	5311	8951	12952
	6094	4968	5437
	6263	7738	8860
	5277	9648	7670
	3804	7497	10875
	8212	6886	18102
	8039	14079	10502
	6320	13465	10508
	6523	9469	7191
	5082	16795	8848
	9133	11562	8655
	7777	8768	10736
	4923	7952	10728
	7540	11124	6390
	5559	16502	7552
	4545	8632	9229
	6022	6046	10769
	7480	13234	8569
	8297	8297	10899
	7224	8233	23599
	9096	12574	14658
	4291	12875	19674
	8109	7227	16541
	9531	18018	20103
	6827	6524	12150
	7837	3416	14208
	9021	3939	7801
	8669	12090	11136
	8667	16968	10915
	5104	19394	17056
	7166	19140	7748
	7303	15695	11678
	7351	11755	6456
	4910	6681	13627
	4904	4804	10771
	4788	10347	11829
	6214	12746	21413
	7106	13023	13860
	4699	10602	9114
	5713	10534	9183
	8387	9873	9572
	3555	11881	7758
	9945	16559	8001
	6707	9463	11753
	8226	10826	12601
	3781	13811	11866
	5838	16848	9675
	8581	8687	10682
	8206	20018	7098
	5341	12127	10251
	7340	9060	7243
	17524	20255	6707
	8051	7609	7790
	5186	20777	10883
	6966	8507	10382
	6776	10001	9703
	7452	10113	14212
	5839	8086	8544
	7965	10505	6418
	12959	7335	15275
	4818	11189	24527
	5687	10539	15900
	6150	16103	9156
	5778	18657	12185
	9059	15966	19709
	7626	12493	16300
	7940	16099	12357
	4663	8715	11274
	7426	10904	20908
	4537	13326	23417
	3230	16718	9434
	4478	11784	10428
	5657	9763	7675
	7034	10224	8642
	6879	14731	8428
	8925	15477	12601
	8532	11904	14967
	6920	18871	7771
	14045	12757	11862
	8776	8018	9927
	7028	18404	8776
	6738	17888	10629
	5804	10259	11675
	7347	11619	18792
	7093	16074	19430
	7274	19591	10910
	6306	7974	15549
	6785	7663	11858
	6596	6700	8437
	5839	10843	16060
	3709	7142	10636
	5566	21854	17746
	5448	16987	11263
	5416	10248	9781
	6367	11210	7918
	7629	10397	10370
	6048	12996	7949
	6017	12101	9446
	10428	8264	9317
	6943	6210	16161
	7355	9646	15770
	6514	10683	15187
	4556	9029
	8870
