# Supplementary material for: MITF reprograms the extracellular matrix and focal adhesion in melanoma
Source: eLife. 2021 Jan 13;10:e63093. doi: 10.7554/eLife.63093 (PMC7857731; doi:10.7554/eLife.63093)
Supplement: Figure 3—source data 1. [file elife-63093-fig3-data1.xlsx]

## Sheet: Sheet1
Figure 3h-qPCR
	pB-FLAG			pB-MITF-FLAG
LOXL2	1	1	1	0.312078	0.45266	0.31448
MMP15	1	1	1	0.172431	0.286374	0.418138
MMP2	1	1	1	0.26918	0.587706	0.564237
COL1A2	1	1	1	0.150704	0.145186	0.085152
