# Supplementary material for: MITF reprograms the extracellular matrix and focal adhesion in melanoma
Source: eLife. 2021 Jan 13;10:e63093. doi: 10.7554/eLife.63093 (PMC7857731; doi:10.7554/eLife.63093)
Supplement: Figure 4—source data 1. [file elife-63093-fig4-data1.xlsx]

## Sheet: Sheet1
Figure 4c	fold enrichment over EV-SkMel28			Figure 4d	normalized to actin protein
	CDH1				CDH1
	EV-SkMel28	MITF-X2	MITF-X6		EV-SkMel28	MITF-X2	MITF-X6
	1	0.0059555	0.007334		0.689092	0.0448835	0.0139612
	1	0.0059555	0.0146215		1.25706	0.0596231	0.112322
	1	0.0665627	0.0145014		1.12413	0.0465436	0.0722726
	CDH2				CDH2
	EV-SkMel28	MITF-X2	MITF-X6		EV-SkMel28	MITF-X2	MITF-X6
	1	4.85152	7.08033		0.599554	1.27489	1.10246
	1	7.16058	10.1558		0.939963	1.59019	1.14605
	1	4.08648	5.58803		0.451888	1.00551	1.27585
	TGFB1
	EV-SkMel28	MITF-X2	MITF-X6
	1	4.31224	11.6222
	1	5.01092	5.01092
	1	1.96681	6.11494
