# Supplementary material for: MITF reprograms the extracellular matrix and focal adhesion in melanoma
Source: eLife. 2021 Jan 13;10:e63093. doi: 10.7554/eLife.63093 (PMC7857731; doi:10.7554/eLife.63093)
Supplement: Figure 5—source data 1. [file elife-63093-fig5-data1.xlsx]

## Sheet: Sheet1
Figure 5 g-j
	MITF			E-Cadherin			SERPINA3			ITGA2			N-Cadherin
0h	0.525149	0.955139	1.09128	0.486597	0.795784	0.90972	0.660119	0.801319	0.92569	0.464623	0.691171	0.935128	1.13351	1.43109	1.11046
24h	0.447309	0.359442	0.375862	0.135154	0.067164	0.175859	7.19009	5.87192	1.86936	3.32344	3.58134	1.32043	5.02577	4.45008	4.1927
72h	0.828077	0.460494	0.597556	0.239457	0.091374	0.219766	19.5329	24.2726	29.3881	6.79514	3.57495	1.8984	7.50492	4.28092	4.42926
96h	1.22592	0.687423	1.05917	0.312198	0.243041	0.437016	10.1767	14.3463	11.2198	2.88892	2.00361	1.58337	5.54248	2.45536	2.55741
