# Supplementary material for: MITF reprograms the extracellular matrix and focal adhesion in melanoma
Source: eLife. 2021 Jan 13;10:e63093. doi: 10.7554/eLife.63093 (PMC7857731; doi:10.7554/eLife.63093)
Supplement: Figure 6—figure supplement 1—source data 1. [file elife-63093-fig6-figsupp1-data1.xlsx]

## Sheet: Figure 6-figure supplement 1
Figure 6-figure supplement 1b
	EV-SKmel28	MITF-X2	MITF-X6
	26.8966	12.2857	79.4444
	21.04	13.3333	51.25
	8	12	67.1818
	30.7692	13.375	64
	21.8276	13.6667	23.2
	12.7778	42.3	13.4
	8.71429	38.6667	14
	14.2857	33.5	18.6
	7.625	34.7059	19.1667
	7.84615	50	15.2
Figure 6-figure supplement 1g			Figure 6-figure supplement 1h
	miR-NTC	miR-MITF		miR-NTC	miR-MITF
	2.6875	4.36842		4.15385	6.47059
	2.16667	3.48387		4	8.22222
	1.36842	2.71429		1.76191	6.85714
	3.625	3.86111		4.63636	9
	3.45454	4.38462		4.57895	10.4444
	2			4.72727	8.4
