# Supplementary material for: MITF reprograms the extracellular matrix and focal adhesion in melanoma
Source: eLife. 2021 Jan 13;10:e63093. doi: 10.7554/eLife.63093 (PMC7857731; doi:10.7554/eLife.63093)
Supplement: Figure 6—figure supplement 2—source data 1. [file elife-63093-fig6-figsupp2-data1.xlsx]

## Sheet: Sheet1
western blot quantification
Skmel28
	miR-NTC			miR-MITF
DMSO	0.197336	0.296098	0.322631	0.0595546	0.0478277	0.0121264
Vemurafenib	0.165651	0.0787278	0.190028	0.0437207	0.0341427	0.0450668
501mel
	miR-NTC			miR-MITF
DMSO	0.482092	0.431451	0.931046	0.0765385	0.191943	0.289837
Vemurafenib	1.6788	1.29387	1.17129	0.59931	0.44932	0.47599
	MITF-X2			MITF-X6
DMSO	0.129073	0.0310254	0.113501	0.0553568	0.0231596	0.0366086
Vemurafenib	0.0687716	0.0464983	0.0563356	0.0688486	0.0268725	0.0661188
