# Supplementary material for: MITF reprograms the extracellular matrix and focal adhesion in melanoma
Source: eLife. 2021 Jan 13;10:e63093. doi: 10.7554/eLife.63093 (PMC7857731; doi:10.7554/eLife.63093)
Supplement: Figure 6—source data 1. [file elife-63093-fig6-data1.xlsx]

## Sheet: Sheet1
Figure 6 b
	EV-SkMel28					MITF-X2			MITF-X6
DMSO	10	4.16667	5.71429			20.7143	26	24.2857	28.5714	26
vemurafenib	21.5385	17.5	26	20.75	23	100	33.3333	53.3333	72	58.75	31.1111
Figure 6 e
	miR-NTC						miR-MITF
DMSO	2.07143	4.16667	1.72727	4.45455	4.54545	3.08333	5.4	5.33333	11.6667	7.33333	6.5	7.5
vemurafenib	1.9	3.09091	2	2.77778			13.3333	16.8421	16.3333	16.6667	10.3684
Figure 6 f	miR-NTC					miR-MITF
DMSO	5.71429	6.33333	4.23077	2.22222	5.4	16.375	16	13.5	9.82353
vemurafenib	37	17.75	32	17.5	16.25	33.5	53	35	73
