# Supplementary material for: MITF reprograms the extracellular matrix and focal adhesion in melanoma
Source: eLife. 2021 Jan 13;10:e63093. doi: 10.7554/eLife.63093 (PMC7857731; doi:10.7554/eLife.63093)
Supplement: Figure 7—source data 1. [file elife-63093-fig7-data1.xlsx]

## Sheet: Sheet1
Figure 7 a
	EV-SKmel28			MITF-X2			MITF-X6
0	1	1	1	1	1	1	1	1	1
24	1.52703	1.83976	1.73797	1.27109	1.57535	1.59079	1.2618	1.47604	1.50976
48	2.19235	3.52062	3.8697	1.62319	2.23487	2.92798	1.56177	2.3604	2.02746
72	3.22555	5.23425	6.30902	1.5886	3.24978	3.94314	1.5486	3.24909	3.06774
96	4.00813	5.78082	6.88622	1.77235	3.5803	4.2787	1.68781	3.74215	3.75922
Figure 7 b
	EV-SKmel28	MITF-X2	MITF-X6
	37	31	29
	50	29	24
	41	31	19
Figure 7 c												Figure 7 f
		EV-SkMel28			MITF-X2			MITF-X6					miR-NTC			miR-MITF
	0,000000	0	4.47834	1.64105	0	0	4.62775	0	0	4.1266		0	0	8	7	0	0	0
	1,000000	4.35893	28.8813	20.0773	6.20284	20.9668	21.5268	3.48766	20.7854	22.6127		1	7.06623	19	16	5.46073	25	6
	2,000000	9.1008	32.2989	21.4848	7.95786	22.787	21.9693	6.10097	22.0692	22.4291		2	13.9779	34	22	10.1049	28	15
	3,000000	14.3445	38.958	16.682	10.2613	26.8964	12.9582	8.91408	25.4985	12.0271		3	20.3688	41	37	14.751	15	21
	4,000000	20.1772	44.0408	22.421	12.341	28.2175	14.8015	10.4115	27.3673	15.0099		4	26.9348	48	34	19.9531	19	25
	5,000000	26.7765	47.3631	23.211	13.6812	27.2466	14.1012	12.356	28.195	14.4168		5	34.8245	57	41	24.972	25	33
	6,000000	32.8379	54.2785	27.2751	16.1024	28.5518	15.0536	14.7336	28.3774	15.4921		6	42.4224	67	49	30.1563	29	40
	7,000000	40.5068	62.2612	30.5718	17.9579	32.3874	16.1744	18.0627	31.6812	15.8919		7	50.1373	71	57	34.3503	38	42
	8,000000	47.5458	67.8894	33.7293	20.7767	33.9131	16.5011	20.0655	34.5034	16.6583		8	57.7119	80	65	40.4081	45	51
	9,000000	54.0378	74.4713	37.0878	22.5968	35.4993	17.2888	22.8621	36.9697	16.4501		9	65.643	83	75	46.369	45	58
	10,000000	62.004	79.7863	41.5816	20.29	34.9864	18.4239	25.3559	37.0268	17.4186		10	73.1796	91	80	52.8446	48	64
	11,000000	68.8106	84.6058	46.1102	22.4715	38.9184	18.9624	27.1758	40.2186	17.5517		11	84.0346	88	83	57.9865	53	69
	12,000000	74.3846	88.3175	49.4732	24.7425	38.8319	19.7971	29.7024	41.0976	17.9306		12	93.6103	93	93	64.1951	52	77
	13,000000	79.1046	91.3832	52.4305	26.9942	40.7753	20.2219	32.4986	44.0732	18.3403
	14,000000	82.6335	93.4038	56.5454	30.3285	41.9408	20.087	34.3903	46.2414	18.3678
	15,000000	85.2617	94.8602	60.4638	32.5904	46.5471	21.7095	37.1693	48.758	18.8952
	16,000000	87.4896	95.6158	63.7925	35.6019	47.5319	22.3762	39.4009	50.3379	19.7262
	17,000000	89.3332	96.3126	67.8684	37.9575	50.1592	23.0258	41.9978	52.5155	20.1404
	18,000000	90.2487	97.0552	71.5036	41.2933	51.1364	23.7311	44.1536	54.0966	20.6575
	19,000000	91.8878	97.6715	74.8003	44.7301	53.0984	23.8367	46.1968	56.7113	20.3716
	20,000000	92.8467	98.3507	77.7423	46.9617	55.4947	24.8201	48.1488	58.8944	20.5683
	21,000000	93.674	98.538	81.0054	49.7309	58.0023	25.8957	50.4157	61.4758	20.8239
	22,000000	94.6557	98.6537	83.1824	52.5198	59.4693	25.3829	53.0375	63.7082	21.0261
	24,000000	94.8727	98.8018	91.3996	54.5431	61.6707	32.6366	54.8655	66.1545	28.2828
Figure 7 f
	EV-SKmel28	MITF-X2	MITF-X6
	170	30	47
	453	18	78
	190	101	28
	129	44	46
	256	33	86
