# Supplementary material for: MITF reprograms the extracellular matrix and focal adhesion in melanoma
Source: eLife. 2021 Jan 13;10:e63093. doi: 10.7554/eLife.63093 (PMC7857731; doi:10.7554/eLife.63093)
Supplement: Supplementary file 1. [file elife-63093-supp1.xlsx]

## Sheet: DEG MITF-X6vsEV-SkMEL28
DEG MITF-X6 vs EV-SkMEL28
target_id	ens_gene	ext_gene	pval	qval	b	se_b	mean_obs	var_obs	tech_var	sigma_sq	smooth_sigma_sq	final_sigma_sq	LogFC
ENST00000467482	ENSG00000101850	GPR143	2.03643e-62	5.99534e-59	-8.18462	0.49087	3.60584	19.2288	0.0538552	0.0504267	0.428052	0.428052	-11.8079
ENST00000460393	ENSG00000196549	MME	2.60509e-29	1.46999e-26	-7.41161	0.659418	3.01266	15.7507	0.0590371	0.00617653	0.810627	0.810627	-10.6927
ENST00000368043	ENSG00000026751	SLAMF7	1.20555e-28	6.63667e-26	-7.25769	0.653637	2.9357	15.1014	0.00400166	0.0562109	0.850481	0.850481	-10.4706
ENST00000483392	ENSG00000080166	DCT	5.86696e-19	1.48235e-16	-7.13649	0.802347	3.6771	15.6549	0.188912	1.09861	0.388949	1.09861	-10.2958
ENST00000312481	ENSG00000172752	COL6A5	3.34086e-28	1.82435e-25	-7.08491	0.643374	3.11914	14.4054	0.0813132	-0.00693994	0.746547	0.746547	-10.2214
ENST00000171887	ENSG00000079308	TNS1	3.43177e-30	2.05642e-27	-6.82266	0.597578	3.93046	13.9118	0.25685	0.457349	0.278	0.457349	-9.84301
ENST00000559179	ENSG00000134160	TRPM1	9.20149e-25	3.80037e-22	-6.80208	0.662048	3.25861	13.8203	0.223345	0.477618	0.653271	0.653271	-9.81332
ENST00000617515	ENSG00000274965	TRPM1	2.55303e-22	8.47419e-20	-6.77807	0.697551	3.37835	13.9605	0.233618	0.739537	0.571401	0.739537	-9.77869
ENST00000372431	ENSG00000100979	PLTP	2.29604e-22	7.65872e-20	-6.7283	0.69166	2.671	12.9436	0.00466062	0.00613917	0.952128	0.952128	-9.70688
ENST00000615825	ENSG00000196549	MME	1.88439e-19	5.00383e-17	-6.66285	0.738691	3.20627	13.0276	0.402367	-0.00137039	0.688963	0.688963	-9.61245
ENST00000615583	ENSG00000274965	TRPM1	1.35006e-21	4.19344e-19	-6.64673	0.696296	2.63022	12.6418	0.00564098	0.0167688	0.964015	0.964015	-9.5892
ENST00000560658	ENSG00000134160	TRPM1	1.28402e-21	4.02524e-19	-6.64361	0.695591	2.62866	12.6575	0.0032375	0.0512931	0.964456	0.964456	-9.5847
ENST00000374272	ENSG00000158022	TRIM63	4.43189e-37	3.89736e-34	-6.57773	0.517014	3.97049	12.8201	0.116703	0.417903	0.264577	0.417903	-9.48965
ENST00000447366	ENSG00000101850	GPR143	1.20546e-19	3.26502e-17	-6.42291	0.708258	2.51831	11.8609	0.00965902	0.0767262	0.9936	0.9936	-9.2663
ENST00000222792	ENSG00000106069	CHN2	1.14393e-19	3.1108e-17	-6.31274	0.695671	2.92222	11.7823	0.110989	0.351429	0.856927	0.856927	-9.10735
ENST00000400081	ENSG00000186297	GABRA5	7.71472e-23	2.66524e-20	-6.28305	0.638644	3.35697	11.7543	0.229843	0.324644	0.585889	0.585889	-9.06451
ENST00000428161	ENSG00000069424	KCNAB2	1.46589e-07	8.17626e-06	-6.24836	1.18863	2.50125	11.2546	1.82782	-1.71145	0.997849	0.997849	-9.01447
ENST00000519209	ENSG00000006747	SCIN	1.0151e-16	2.07034e-14	-6.17274	0.743434	2.76695	11.1409	0.184604	0.112239	0.920783	0.920783	-8.90537
ENST00000264930	ENSG00000113504	SLC12A7	8.78032e-18	2.0154e-15	-6.13848	0.714699	2.56753	10.8352	0.0405625	0.040148	0.981028	0.981028	-8.85595
ENST00000331772	ENSG00000184719	RNLS	6.55124e-18	1.53496e-15	-6.13637	0.71167	2.68759	10.9455	0.0658788	0.152199	0.947071	0.947071	-8.85291
ENST00000367033	ENSG00000076356	PLXNA2	6.005e-24	2.2716e-21	-6.09058	0.603517	3.23382	11.1647	0.0582344	0.602228	0.67023	0.67023	-8.78684
ENST00000349752	ENSG00000158089	GALNT14	6.45544e-17	1.34085e-14	-6.0734	0.72678	2.34355	10.5724	0.0195951	0.0194929	1.03682	1.03682	-8.76206
ENST00000494110	ENSG00000115648	MLPH	2.28699e-14	3.68711e-12	-6.00899	0.7872	2.31135	10.3245	0.19415	-0.184876	1.04522	1.04522	-8.66913
ENST00000415485	ENSG00000089169	RPH3A	9.96269e-17	2.04425e-14	-5.98058	0.720098	4.22396	11.1082	0.176493	0.86059	0.197713	0.86059	-8.62815
ENST00000341757	ENSG00000006747	SCIN	8.01651e-15	1.34695e-12	-5.90771	0.760585	2.26071	10.0171	0.0978408	-0.0448737	1.05914	1.05914	-8.52301
ENST00000361511	ENSG00000086717	PPEF1	4.9837e-15	8.6751e-13	-5.87522	0.750604	2.24446	9.86994	0.0629873	-0.0541288	1.06383	1.06383	-8.47615
ENST00000310858	ENSG00000079308	TNS1	1.39815e-15	2.53135e-13	-5.85658	0.73339	2.23514	9.80933	0.00923275	0.00182543	1.06649	1.06649	-8.44925
ENST00000413554	ENSG00000079308	TNS1	1.20264e-14	1.99594e-12	-5.78757	0.750098	2.27673	9.7584	0.0706704	0.148791	1.05462	1.05462	-8.3497
ENST00000338530	ENSG00000115648	MLPH	1.53751e-09	1.24235e-07	-5.68882	0.941799	4.52874	10.767	0.273329	1.50064	0.135396	1.50064	-8.20723
ENST00000409373	ENSG00000115648	MLPH	2.09637e-10	1.96337e-08	-5.67778	0.89356	2.57814	9.676	0.618659	-0.0757104	0.978238	0.978238	-8.19129
ENST00000468178	ENSG00000115648	MLPH	1.73708e-10	1.65201e-08	-5.63009	0.882051	3.00281	10.3903	0.238333	1.31769	0.816047	1.31769	-8.12249
ENST00000492627	ENSG00000110651	CD81	1.93251e-11	2.15646e-09	-5.53654	0.824991	2.07512	8.87806	0.256288	-0.11632	1.10493	1.10493	-7.98754
ENST00000377028	ENSG00000080166	DCT	4.52619e-69	1.3931e-65	-5.51491	0.313963	6.86771	8.85877	0.0183617	0.178783	0.0225316	0.178783	-7.95633
ENST00000558070	ENSG00000134160	TRPM1	2.19589e-13	3.21145e-11	-5.48377	0.747486	2.04874	8.59678	0.00740643	-0.00175288	1.11006	1.11006	-7.91141
ENST00000323108	ENSG00000249481	SPATS1	2.9841e-11	3.23817e-09	-5.45937	0.821285	3.7159	9.67193	0.257748	1.09127	0.369062	1.09127	-7.8762
ENST00000369356	ENSG00000178104	PDE4DIP	6.11854e-12	7.41154e-10	-5.45534	0.793289	2.73774	9.42863	0.327724	0.75211	0.93089	0.93089	-7.87038
ENST00000573882	ENSG00000141527	CARD14	3.42502e-06	0.000145677	-5.43782	1.17105	2.1008	8.48469	1.64309	-1.60091	1.09963	1.09963	-7.84511
ENST00000321728	ENSG00000166501	PRKCB	9.57159e-13	1.28851e-10	-5.42514	0.760193	2.19379	8.48465	0.0780746	0.00997331	1.07771	1.07771	-7.82682
ENST00000462745	ENSG00000196549	MME	9.25651e-09	6.58388e-07	-5.39538	0.939337	2.00454	9.5296	0.646724	0.767779	1.11798	1.11798	-7.78388
ENST00000446688	ENSG00000079308	TNS1	3.0701e-12	3.90029e-10	-5.33559	0.765017	3.44908	9.13716	0.162948	1.00755	0.524398	1.00755	-7.69763
ENST00000613740	ENSG00000145242	EPHA5	2.39216e-12	3.09122e-10	-5.31046	0.757612	1.96208	8.11104	0.0231024	0.039455	1.12485	1.12485	-7.66137
ENST00000306317	ENSG00000168481	LGI3	7.49625e-12	8.92081e-10	-5.27547	0.770381	1.94459	7.99776	0.059493	-0.00562104	1.12748	1.12748	-7.61088
ENST00000477457	ENSG00000115648	MLPH	4.86173e-12	6.00734e-10	-5.22024	0.75551	2.52105	8.05498	0.148679	0.165168	0.992912	0.992912	-7.53121
ENST00000405010	ENSG00000048052	HDAC9	0.000110784	0.00316437	-5.17817	1.33953	3.22517	10.737	0.5573	3.03136	0.676129	3.03136	-7.47051
ENST00000296522	ENSG00000164120	HPGD	9.31325e-11	9.28761e-09	-5.16435	0.797251	1.88903	7.70654	0.136063	-0.0352643	1.13515	1.13515	-7.45058
ENST00000359331	ENSG00000026751	SLAMF7	1.30366e-10	1.27014e-08	-5.15847	0.802658	1.88609	7.67117	0.152985	-0.0732399	1.13553	1.13553	-7.4421
ENST00000368042	ENSG00000026751	SLAMF7	5.33361e-08	3.25658e-06	-5.12074	0.941344	1.86723	7.574	0.634355	-0.538665	1.1379	1.1379	-7.38766
ENST00000481227	ENSG00000178104	PDE4DIP	7.70491e-11	7.78691e-09	-5.10011	0.783879	2.40762	7.95488	0.208138	0.402165	1.02079	1.02079	-7.35791
ENST00000289575	ENSG00000137491	SLCO2B1	5.73147e-08	3.46823e-06	-5.05357	0.931193	1.83364	7.42286	0.592363	-0.445211	1.14188	1.14188	-7.29075
ENST00000409874	ENSG00000156414	TDRD9	4.64113e-11	4.83484e-09	-5.05306	0.767708	1.83338	7.34772	0.0368443	0.024341	1.14191	1.14191	-7.29003
ENST00000464123	ENSG00000115648	MLPH	6.54421e-11	6.67361e-09	-5.00507	0.766386	1.80939	7.16162	0.0301271	-0.0251576	1.14457	1.14457	-7.22079
ENST00000428693	ENSG00000182670	TTC3	8.81814e-07	4.22578e-05	-4.99066	1.01512	3.51465	8.88272	0.320424	1.74051	0.482559	1.74051	-7.2
ENST00000472871	ENSG00000080166	DCT	2.66873e-17	5.73676e-15	-4.97333	0.587849	3.84175	7.3495	0.379408	-0.0496692	0.311725	0.311725	-7.175
ENST00000429277	ENSG00000122367	LDB3	5.06821e-07	2.56298e-05	-4.92257	0.979866	2.63098	8.40868	0.956474	0.776432	0.963801	0.963801	-7.10176
ENST00000511294	ENSG00000145242	EPHA5	1.15844e-09	9.54278e-08	-4.90429	0.805846	2.02655	7.05901	0.184634	0.0335184	1.11414	1.11414	-7.07539
ENST00000611005	ENSG00000276482	SLC12A7	2.71642e-07	1.44264e-05	-4.90027	0.952965	1.94842	7.22185	0.689372	-0.268105	1.12691	1.12691	-7.06959
ENST00000381174	ENSG00000124343	XG	1.23303e-10	1.20654e-08	-4.89971	0.761391	1.75671	6.89898	0.00946144	0.0369617	1.14997	1.14997	-7.06878
ENST00000512097	ENSG00000080709	KCNN2	1.70648e-09	1.36263e-07	-4.89225	0.81219	1.75298	7.00092	0.168971	0.0207214	1.15033	1.15033	-7.05803
ENST00000446125	ENSG00000080166	DCT	7.91752e-13	1.07722e-10	-4.89005	0.682722	4.27425	6.95966	0.746046	-0.597297	0.186173	0.186173	-7.05484
ENST00000335625	ENSG00000186297	GABRA5	8.82428e-09	6.2981e-07	-4.86518	0.845839	1.73944	6.77275	0.279258	-0.267724	1.15163	1.15163	-7.01897
ENST00000430329	ENSG00000232242	ZYG11AP1	1.75421e-10	1.66595e-08	-4.86081	0.761709	1.73726	6.8283	0.0085675	0.0819618	1.15183	1.15183	-7.01266
ENST00000338230	ENSG00000189190	ZNF600	1.52135e-10	1.46746e-08	-4.84316	0.756363	2.31482	6.91668	0.0998728	0.150861	1.0443	1.0443	-6.98719
ENST00000564887	ENSG00000102900	NUP93	2.68553e-05	0.000911117	-4.83597	1.1518	3.70755	8.95615	0.667493	1.9858	0.373254	1.9858	-6.97683
ENST00000354638	ENSG00000104044	OCA2	0.000109241	0.00312903	-4.83264	1.24904	3.78416	9.34712	0.185865	2.93432	0.336587	2.93432	-6.97202
ENST00000309263	ENSG00000175356	SCUBE2	3.55888e-10	3.20455e-08	-4.80649	0.766312	2.23783	7.15912	0.10874	0.542783	1.06573	1.06573	-6.9343
ENST00000548285	ENSG00000129521	EGLN3	3.63621e-10	3.26983e-08	-4.7964	0.765111	1.70505	6.6403	0.0161484	0.062386	1.15464	1.15464	-6.91973
ENST00000617968	ENSG00000273936	TNFRSF14	2.74077e-09	2.09701e-07	-4.78019	0.803877	2.74586	7.16354	0.364304	0.376433	0.928133	0.928133	-6.89635
ENST00000475523	ENSG00000157873	TNFRSF14	2.74077e-09	2.09701e-07	-4.78019	0.803877	2.74586	7.16354	0.364304	0.376433	0.928133	0.928133	-6.89635
ENST00000617214	ENSG00000273645	KBTBD11	1.12415e-21	3.55699e-19	-4.77813	0.499554	3.7678	6.80907	0.155033	0.178706	0.344075	0.344075	-6.89338
ENST00000457749	ENSG00000198538	ZNF28	1.93035e-09	1.52342e-07	-4.7557	0.792146	1.6847	6.57708	0.0988291	0.0355441	1.15616	1.15616	-6.86102
ENST00000534098	ENSG00000085831	TTC39A	2.70903e-10	2.47219e-08	-4.72123	0.747672	3.09103	6.89258	0.353726	0.257615	0.764301	0.764301	-6.81129
ENST00000395097	ENSG00000119508	NR4A3	4.16169e-08	2.59963e-06	-4.70171	0.857375	2.92954	6.75013	0.616739	-0.110294	0.853444	0.853444	-6.78314
ENST00000360490	ENSG00000196549	MME	2.9419e-06	0.00012664	-4.66252	0.997366	1.99153	7.03733	0.869317	0.0945351	1.12016	1.12016	-6.72659
ENST00000480178	ENSG00000101850	GPR143	2.36403e-09	1.83783e-07	-4.64753	0.778405	1.89817	6.34355	0.0778679	0.123082	1.13396	1.13396	-6.70497
ENST00000595607	ENSG00000178150	ZNF114	6.43706e-10	5.52437e-08	-4.64614	0.751883	2.12729	6.69354	0.0368232	0.576764	1.09383	1.09383	-6.70296
ENST00000398806	ENSG00000056998	GYG2	3.529e-07	1.84382e-05	-4.6191	0.906995	2.05848	6.59667	0.537076	0.046994	1.10821	1.10821	-6.66395
ENST00000510835	ENSG00000164120	HPGD	3.33365e-09	2.51651e-07	-4.61693	0.780643	1.79279	6.24268	0.0724749	0.105306	1.14633	1.14633	-6.66082
ENST00000392055	ENSG00000153823	PID1	4.03918e-08	2.53055e-06	-4.60083	0.838171	2.12099	6.50925	0.309815	0.22844	1.09525	1.09525	-6.63759
ENST00000381471	ENSG00000120215	MLANA	7.10153e-15	1.20217e-12	-4.56821	0.586973	4.74726	6.51975	0.587121	0.0630805	0.101952	0.101952	-6.59053
ENST00000626465	ENSG00000273936	TNFRSF14	2.7425e-12	3.49723e-10	-4.56576	0.653154	3.05016	6.45	0.0641086	0.51217	0.789113	0.789113	-6.587
ENST00000496064	ENSG00000157873	TNFRSF14	2.7425e-12	3.49723e-10	-4.56576	0.653154	3.05016	6.45	0.0641086	0.51217	0.789113	0.789113	-6.587
ENST00000519578	ENSG00000104299	INTS9	2.61264e-09	2.00689e-07	-4.56519	0.766711	1.58945	6.00455	0.0148913	0.0434335	1.1608	1.1608	-6.58617
ENST00000465778	ENSG00000234487	HLA-F	4.70148e-06	0.000193527	-4.56009	0.996156	4.43144	7.6424	0.429254	1.5554	0.153286	1.5554	-6.57882
ENST00000453258	ENSG00000138185	ENTPD1	2.82687e-11	3.09234e-09	-4.55606	0.684574	3.10936	6.48254	0.184504	0.459244	0.752779	0.752779	-6.573
ENST00000412248	ENSG00000115339	GALNT3	3.05684e-07	1.61457e-05	-4.55025	0.888736	2.4396	7.26968	0.291925	1.28778	1.01297	1.28778	-6.56462
ENST00000481828	ENSG00000196549	MME	5.49997e-09	4.05685e-07	-4.5142	0.774133	1.56395	5.95055	0.0371842	0.112474	1.16138	1.16138	-6.5126
ENST00000376896	ENSG00000198963	RORB	3.01261e-09	2.28948e-07	-4.51042	0.760494	2.05379	6.22935	0.0475973	0.43868	1.1091	1.1091	-6.50716
ENST00000533768	ENSG00000178104	PDE4DIP	4.62739e-08	2.85639e-06	-4.49023	0.821624	1.55197	5.9039	0.188571	-0.0213916	1.16156	1.16156	-6.47802
ENST00000367459	ENSG00000090104	RGS1	4.93911e-09	3.65111e-07	-4.49006	0.767636	1.55189	5.84069	0.0169697	0.0769391	1.16156	1.16156	-6.47779
ENST00000264773	ENSG00000080709	KCNN2	2.52466e-13	3.66065e-11	-4.47728	0.611851	3.29653	6.33236	0.121489	0.584257	0.627235	0.627235	-6.45934
ENST00000415753	ENSG00000115648	MLPH	1.69068e-09	1.3532e-07	-4.46106	0.74042	2.77893	6.62583	0.166726	0.929719	0.91648	0.929719	-6.43595
ENST00000483165	ENSG00000002822	MAD1L1	6.81694e-09	4.94063e-07	-4.45681	0.769029	1.53526	5.71186	0.0210961	0.0216933	1.16171	1.16171	-6.42981
ENST00000630160	ENSG00000273936	TNFRSF14	2.46685e-08	1.60459e-06	-4.45115	0.798327	3.7031	6.75333	0.0328358	1.24181	0.37551	1.24181	-6.42164
ENST00000463471	ENSG00000157873	TNFRSF14	2.46685e-08	1.60459e-06	-4.45115	0.798327	3.7031	6.75333	0.0328358	1.24181	0.37551	1.24181	-6.42164
ENST00000264867	ENSG00000109819	PPARGC1A	7.49761e-11	7.60009e-09	-4.44304	0.682458	3.31803	6.43859	0.242064	0.689433	0.612483	0.689433	-6.40994
ENST00000303531	ENSG00000166501	PRKCB	4.7263e-18	1.11122e-15	-4.44232	0.512982	4.33238	6.08946	0.0971349	0.429167	0.173441	0.429167	-6.40891
ENST00000451024	ENSG00000229544	NKX1-2	7.13481e-09	5.15602e-07	-4.43767	0.766739	2.28895	5.78985	0.124528	0.0659865	1.05125	1.05125	-6.4022
ENST00000454962	ENSG00000137491	SLCO2B1	5.43747e-07	2.73542e-05	-4.42522	0.883243	1.51946	5.71424	0.39848	-0.259401	1.16176	1.16176	-6.38424
ENST00000621293	ENSG00000182612	TSPAN10	1.07253e-07	6.12861e-06	-4.42092	0.831941	1.88482	5.93193	0.248554	0.15718	1.1357	1.1357	-6.37804
ENST00000316950	ENSG00000196437	ZNF569	2.52274e-06	0.000110208	-4.41865	0.938882	1.85305	5.77781	0.623382	-0.39075	1.13962	1.13962	-6.37475
ENST00000326016	ENSG00000136002	ARHGEF4	2.20128e-06	9.7231e-05	-4.41832	0.933314	1.51601	5.61857	0.580396	-0.532575	1.16175	1.16175	-6.37428
ENST00000619380	NA	NA	4.16078e-06	0.000173372	-4.41631	0.959403	2.24542	6.63013	0.777357	0.456534	1.06355	1.06355	-6.37138
ENST00000568218	ENSG00000260211	AC139426.1	1.75527e-08	1.18263e-06	-4.41337	0.783271	1.51354	5.57262	0.065276	-0.0564901	1.16175	1.16175	-6.36714
ENST00000371205	ENSG00000138185	ENTPD1	2.04905e-07	1.11893e-05	-4.40663	0.848271	2.11387	5.77388	0.342311	-0.0788945	1.09682	1.09682	-6.35741
ENST00000485956	ENSG00000115648	MLPH	1.72664e-08	1.16682e-06	-4.40004	0.780513	2.38946	6.05018	0.193126	0.411961	1.02527	1.02527	-6.34791
ENST00000397795	ENSG00000134160	TRPM1	5.04135e-08	3.09196e-06	-4.39087	0.805687	1.50229	5.5458	0.136566	-0.0930385	1.1617	1.1617	-6.33468
ENST00000426088	ENSG00000106772	PRUNE2	2.64839e-05	0.000903428	-4.39037	1.04489	2.27823	5.92245	1.12937	-0.644948	1.05421	1.05421	-6.33395
ENST00000455470	ENSG00000151835	SACS	1.71021e-05	0.000609813	-4.38659	1.02021	2.33198	6.9904	1.04184	0.699561	1.03981	1.03981	-6.32851
ENST00000330847	ENSG00000119508	NR4A3	2.1439e-19	5.62675e-17	-4.38461	0.486874	5.20428	5.73473	0.415893	-0.133657	0.058199	0.058199	-6.32566
ENST00000376717	ENSG00000106772	PRUNE2	5.12631e-06	0.000209233	-4.37971	0.960558	2.24351	6.77407	0.781244	0.727881	1.0641	1.0641	-6.31859
ENST00000434505	ENSG00000223572	CKMT1A	6.06128e-09	4.42271e-07	-4.37231	0.751894	2.83546	5.95706	0.235849	0.341707	0.89484	0.89484	-6.3079
ENST00000531299	ENSG00000129158	SERGEF	1.29251e-08	8.95797e-07	-4.36154	0.766925	2.21026	6.3323	0.102993	0.94367	1.07335	1.07335	-6.29237
ENST00000506468	ENSG00000249481	SPATS1	3.64965e-08	2.31611e-06	-4.35796	0.791346	1.48583	5.66727	0.0909248	0.190298	1.16153	1.16153	-6.2872
ENST00000578554	ENSG00000141337	ARSG	2.92615e-08	1.88524e-06	-4.35616	0.785488	2.77269	6.47945	0.084306	1.14968	0.918733	1.14968	-6.28461
ENST00000611590	ENSG00000182612	TSPAN10	1.22736e-06	5.68069e-05	-4.34358	0.895369	1.89757	5.5454	0.469331	-0.288607	1.13404	1.13404	-6.26646
ENST00000305031	ENSG00000198108	CHSY3	2.47043e-08	1.60538e-06	-4.31086	0.773201	2.14683	5.60236	0.106345	0.235231	1.08934	1.08934	-6.21925
ENST00000263666	ENSG00000121440	PDZRN3	7.18842e-07	3.50432e-05	-4.30021	0.867641	4.03114	6.57388	0.258876	1.24673	0.246327	1.24673	-6.20388
ENST00000372141	ENSG00000185737	NRG3	7.6003e-07	3.67862e-05	-4.29678	0.868851	2.23873	5.7158	0.444335	0.0699896	1.06547	1.06547	-6.19894
ENST00000308831	ENSG00000173156	RHOD	2.82583e-08	1.82407e-06	-4.27003	0.769111	1.44187	5.26354	0.0224569	0.04063	1.16061	1.16061	-6.16034
ENST00000243639	ENSG00000204604	ZNF468	2.66088e-08	1.72252e-06	-4.26872	0.767423	2.91819	5.35845	0.319056	-0.141512	0.858821	0.858821	-6.15845
ENST00000410032	ENSG00000115648	MLPH	5.88024e-05	0.00182091	-4.26717	1.06213	1.44044	5.24055	1.09567	-1.05127	1.16057	1.16057	-6.15622
ENST00000259698	ENSG00000111913	RIPOR2	1.5376e-06	7.01115e-05	-4.26206	0.886768	2.93369	6.53809	0.435832	1.13688	0.851454	1.13688	-6.14885
ENST00000485207	ENSG00000160256	FAM207A	2.64735e-07	1.41149e-05	-4.25728	0.827143	1.75832	5.56588	0.218516	0.233548	1.14981	1.14981	-6.14195
ENST00000381476	ENSG00000120215	MLANA	1.56111e-26	7.09446e-24	-4.24583	0.398285	6.30238	5.42253	0.0290681	0.288193	0.0272396	0.288193	-6.12543
ENST00000381477	ENSG00000120215	MLANA	8.92615e-53	1.94973e-49	-4.24115	0.277382	6.59738	5.27115	0.013832	0.14005	0.024417	0.14005	-6.11869
ENST00000498338	ENSG00000184381	PLA2G6	7.62302e-08	4.53583e-06	-4.24093	0.788888	2.19104	5.51471	0.166265	0.272402	1.07842	1.07842	-6.11836
ENST00000254528	ENSG00000132205	EMILIN2	1.82333e-230	6.17317e-226	-4.23696	0.130719	6.66857	5.14954	0.0103151	0.0135561	0.02386	0.02386	-6.11263
ENST00000525630	ENSG00000178104	PDE4DIP	4.50044e-07	2.28955e-05	-4.22546	0.83731	1.41958	5.12237	0.242299	-0.217702	1.15988	1.15988	-6.09605
ENST00000510044	ENSG00000159685	CHCHD6	3.03783e-08	1.95347e-06	-4.2231	0.762396	3.15114	6.09201	0.125271	1.03723	0.725776	1.03723	-6.09264
ENST00000422695	ENSG00000115648	MLPH	1.7852e-07	9.84378e-06	-4.21565	0.807531	1.70286	5.25181	0.149401	0.0538066	1.15481	1.15481	-6.08189
ENST00000469619	ENSG00000115648	MLPH	7.08305e-07	3.45793e-05	-4.21231	0.849415	2.13113	5.44487	0.350047	0.087784	1.09296	1.09296	-6.07708
ENST00000618101	ENSG00000119508	NR4A3	1.44083e-05	0.000524813	-4.20995	0.970583	4.04334	6.67881	0.426013	1.45805	0.242954	1.45805	-6.07367
ENST00000396396	ENSG00000154330	PGM5	9.46505e-08	5.50607e-06	-4.2089	0.788671	1.4113	5.17021	0.0844399	0.0425132	1.15956	1.15956	-6.07216
ENST00000410045	ENSG00000198130	HIBCH	1.56267e-12	2.06263e-10	-4.20254	0.594518	4.33844	5.19068	0.53475	-0.366058	0.172154	0.172154	-6.06297
ENST00000355300	ENSG00000169783	LINGO1	3.89074e-08	2.45759e-06	-4.19653	0.763598	2.47139	5.89594	0.160962	0.84734	1.0052	1.0052	-6.05432
ENST00000416372	ENSG00000040608	RTN4R	5.27201e-06	0.000214792	-4.18759	0.919609	2.92818	6.44363	0.837266	0.835009	0.854094	0.854094	-6.04141
ENST00000341752	ENSG00000185046	ANKS1B	7.5187e-07	3.64695e-05	-4.16924	0.842703	1.39147	5.0647	0.261578	-0.146944	1.15872	1.15872	-6.01494
ENST00000432539	ENSG00000096155	BAG6	0.000960204	0.0202929	-4.16865	1.26249	1.39432	4.99847	2.0289	-1.98989	1.15885	1.15885	-6.01408
ENST00000392701	ENSG00000115339	GALNT3	3.40254e-05	0.00112443	-4.14152	0.999233	4.30537	6.61229	0.23255	1.76438	0.179276	1.76438	-5.97495
ENST00000436544	ENSG00000163803	PLB1	1.14377e-49	2.03811e-46	-4.10907	0.277328	4.92259	4.95597	0.0451455	0.108676	0.0813713	0.108676	-5.92813
ENST00000373640	ENSG00000204128	C2orf72	4.71425e-05	0.00149867	-4.09547	1.00642	3.09552	6.52861	0.119161	1.90659	0.761498	1.90659	-5.90851
ENST00000432475	ENSG00000115648	MLPH	1.31544e-07	7.40418e-06	-4.09374	0.775817	1.35372	4.83827	0.0470257	0.0113929	1.15676	1.15676	-5.90601
ENST00000354839	ENSG00000145242	EPHA5	1.83532e-05	0.000650315	-4.08533	0.953617	1.34952	5.3682	0.662258	0.0373325	1.15651	1.15651	-5.89388
ENST00000530130	ENSG00000178104	PDE4DIP	2.43332e-12	3.13247e-10	-4.08383	0.582814	4.0675	4.88272	0.4428	-0.305504	0.236543	0.236543	-5.89171
ENST00000625292	ENSG00000273936	TNFRSF14	9.46449e-12	1.10115e-09	-4.06545	0.596596	3.98247	4.86892	0.451078	-0.279971	0.260775	0.260775	-5.8652
ENST00000466750	ENSG00000157873	TNFRSF14	9.46449e-12	1.10115e-09	-4.06545	0.596596	3.98247	4.86892	0.451078	-0.279971	0.260775	0.260775	-5.8652
ENST00000377602	ENSG00000148488	ST8SIA6	2.1977e-07	1.19721e-05	-4.05574	0.782692	1.5414	4.78278	0.0635435	0.0333461	1.16167	1.16167	-5.8512
ENST00000626042	ENSG00000273936	TNFRSF14	1.25102e-07	7.06509e-06	-4.0553	0.767194	2.70822	5.08062	0.236589	0.208993	0.940585	0.940585	-5.85055
ENST00000442392	ENSG00000157873	TNFRSF14	1.25102e-07	7.06509e-06	-4.0553	0.767194	2.70822	5.08062	0.236589	0.208993	0.940585	0.940585	-5.85055
ENST00000453356	ENSG00000079308	TNS1	4.33651e-07	2.21781e-05	-4.03628	0.798699	1.32499	4.72262	0.120869	-0.0416532	1.15497	1.15497	-5.82311
ENST00000511506	ENSG00000163644	PPM1K	1.55669e-08	1.06152e-06	-4.02628	0.711962	2.83271	5.12821	0.117829	0.461432	0.895949	0.895949	-5.80869
ENST00000569415	ENSG00000259993	AC135731.1	3.67227e-07	1.9069e-05	-4.02572	0.791653	1.63796	4.87295	0.09449	0.188487	1.15894	1.15894	-5.80788
ENST00000464924	ENSG00000178104	PDE4DIP	3.73897e-07	1.93856e-05	-4.02225	0.791502	3.46611	5.69638	0.050834	1.20212	0.513346	1.20212	-5.80287
ENST00000621377	ENSG00000026751	SLAMF7	1.40212e-05	0.000512643	-4.0176	0.924963	1.31566	4.73267	0.556774	-0.415705	1.15434	1.15434	-5.79617
ENST00000471304	ENSG00000229698	HLA-F	6.9155e-07	3.38835e-05	-4.01193	0.80825	1.7179	4.88673	0.152956	0.183034	1.15358	1.15358	-5.78798
ENST00000490333	ENSG00000235220	HLA-F	6.9155e-07	3.38835e-05	-4.01193	0.80825	1.7179	4.88673	0.152956	0.183034	1.15358	1.15358	-5.78798
ENST00000470816	ENSG00000137403	HLA-F	6.9155e-07	3.38835e-05	-4.01193	0.80825	1.7179	4.88673	0.152956	0.183034	1.15358	1.15358	-5.78798
ENST00000485463	ENSG00000206509	HLA-F	6.9155e-07	3.38835e-05	-4.01193	0.80825	1.7179	4.88673	0.152956	0.183034	1.15358	1.15358	-5.78798
ENST00000474636	ENSG00000237508	HLA-F	6.9155e-07	3.38835e-05	-4.01193	0.80825	1.7179	4.88673	0.152956	0.183034	1.15358	1.15358	-5.78798
ENST00000381163	ENSG00000056998	GYG2	2.01176e-27	1.00164e-24	-4.00704	0.369339	5.92889	4.73728	0.240069	-0.065359	0.032754	0.032754	-5.78093
ENST00000448094	ENSG00000184381	PLA2G6	9.58433e-06	0.000366037	-4.0023	0.9042	2.40622	5.34541	0.614014	0.282827	1.02114	1.02114	-5.77409
ENST00000262487	ENSG00000101230	ISM1	1.55529e-10	1.49381e-08	-3.99953	0.624941	3.4659	4.69726	0.26762	-0.119558	0.513482	0.513482	-5.77009
ENST00000627817	ENSG00000273936	TNFRSF14	5.51917e-08	3.35174e-06	-3.99522	0.735265	3.3282	4.74061	0.475713	-0.265599	0.605515	0.605515	-5.76388
ENST00000463835	ENSG00000157873	TNFRSF14	5.51917e-08	3.35174e-06	-3.99522	0.735265	3.3282	4.74061	0.475713	-0.265599	0.605515	0.605515	-5.76388
ENST00000530004	ENSG00000085831	TTC39A	1.73528e-37	1.6096e-34	-3.99079	0.311888	5.04272	4.65267	0.124425	-0.00511984	0.0701235	0.0701235	-5.75749
ENST00000497757	ENSG00000114541	FRMD4B	3.81822e-13	5.40885e-11	-3.97738	0.547709	3.8071	4.61661	0.273569	-0.160716	0.326401	0.326401	-5.73815
ENST00000409820	ENSG00000198130	HIBCH	1.37441e-06	6.31378e-05	-3.9678	0.821716	1.29075	4.5546	0.197884	-0.131998	1.15255	1.15255	-5.72432
ENST00000346874	ENSG00000148498	PARD3	0.000878021	0.0187787	-3.96563	1.19197	1.28967	4.54681	1.68912	-1.62658	1.15247	1.15247	-5.72119
ENST00000411816	ENSG00000196177	ACADSB	7.00702e-07	3.4291e-05	-3.95311	0.796811	1.28341	4.54938	0.117819	-0.0192447	1.152	1.152	-5.70313
ENST00000323011	ENSG00000081138	CDH7	4.07131e-06	0.000170278	-3.94839	0.856909	2.18528	5.001	0.388682	0.249235	1.0799	1.0799	-5.69631
ENST00000353809	ENSG00000104044	OCA2	5.86314e-05	0.00181698	-3.9388	0.980227	3.9521	6.07977	0.609976	1.31171	0.270608	1.31171	-5.68248
ENST00000473116	ENSG00000168874	ATOH8	2.44555e-09	1.89036e-07	-3.9387	0.660296	3.06525	5.1672	0.0918747	0.7654	0.780108	0.780108	-5.68234
ENST00000462627	ENSG00000102349	KLF8	2.44233e-06	0.000107388	-3.93819	0.835622	2.3707	5.16985	0.366583	0.495122	1.02995	1.02995	-5.68161
ENST00000434770	ENSG00000115648	MLPH	1.14322e-06	5.33524e-05	-3.93372	0.808537	2.14549	5.03999	0.217816	0.504118	1.08965	1.08965	-5.67516
ENST00000376131	ENSG00000102466	FGF14	6.20074e-07	3.08049e-05	-3.91377	0.785132	2.44986	4.73936	0.2224	0.200989	1.01046	1.01046	-5.64637
ENST00000354050	ENSG00000100979	PLTP	1.49995e-05	0.000543717	-3.90158	0.901329	1.25764	4.41321	0.474817	-0.400172	1.14997	1.14997	-5.62878
ENST00000376848	ENSG00000229698	HLA-F	3.90131e-06	0.000163471	-3.89447	0.843586	3.28091	5.33304	0.78531	0.380924	0.637964	0.637964	-5.61854
ENST00000509016	ENSG00000164111	ANXA5	0.000280863	0.00710425	-3.8842	1.06934	1.24895	4.60658	1.13771	-0.792368	1.14926	1.14926	-5.60371
ENST00000519685	ENSG00000008853	RHOBTB2	0.000585777	0.0133282	-3.87975	1.12845	1.24673	4.9713	1.39773	-0.615359	1.14907	1.14907	-5.59729
ENST00000489682	ENSG00000168874	ATOH8	1.101e-05	0.000414177	-3.87517	0.881456	3.11201	5.62249	0.302542	1.25139	0.751096	1.25139	-5.59068
ENST00000549413	ENSG00000185664	PMEL	4.16406e-06	0.000173372	-3.86911	0.840559	3.38925	5.48836	0.763732	0.649347	0.564058	0.649347	-5.58194
ENST00000543227	ENSG00000213020	ZNF611	0.00166552	0.0321945	-3.86839	1.23033	1.24105	4.922	1.87884	-1.12465	1.14859	1.14859	-5.5809
ENST00000442488	ENSG00000128610	FEZF1	1.59575e-06	7.26165e-05	-3.86568	0.805543	2.28017	4.52928	0.24413	0.0588623	1.05367	1.05367	-5.577
ENST00000379612	ENSG00000133816	MICAL2	1.08216e-05	0.000407542	-3.8628	0.877894	2.74531	5.5844	0.380983	1.16041	0.92832	1.16041	-5.57284
ENST00000583477	ENSG00000108932	SLC16A6	1.68896e-06	7.64468e-05	-3.84585	0.803315	2.27059	5.1491	0.23429	0.842805	1.05634	1.05634	-5.54838
ENST00000463287	ENSG00000184381	PLA2G6	5.09278e-05	0.00160618	-3.84118	0.948129	2.1267	4.85689	0.703929	0.0442214	1.09397	1.09397	-5.54165
ENST00000506998	ENSG00000159788	RGS12	5.21461e-05	0.00163898	-3.82167	0.944604	1.21769	4.31281	0.638002	-0.474782	1.14655	1.14655	-5.51351
ENST00000379892	ENSG00000133083	DCLK1	4.34108e-06	0.000179819	-3.8202	0.831501	1.43658	4.28046	0.222339	-0.0931195	1.16045	1.16045	-5.51139
ENST00000302850	ENSG00000171105	INSR	2.9757e-05	0.00100308	-3.81853	0.914547	1.86349	5.19036	0.534434	0.660599	1.13836	1.13836	-5.50897
ENST00000382989	ENSG00000196549	MME	6.90542e-07	3.38835e-05	-3.81836	0.76921	1.2283	4.17428	0.0358757	-0.0258557	1.14749	1.14749	-5.50873
ENST00000551935	ENSG00000129521	EGLN3	6.59085e-07	3.25281e-05	-3.81636	0.767409	1.21503	4.20836	0.0315209	0.0233648	1.14631	1.14631	-5.50584
ENST00000459638	ENSG00000114541	FRMD4B	7.80591e-13	1.06565e-10	-3.81006	0.531795	3.96524	4.18549	0.299338	-0.255109	0.266274	0.266274	-5.49675
ENST00000490566	ENSG00000079308	TNS1	3.09465e-05	0.00103613	-3.80891	0.914199	2.3468	4.59512	0.635527	-0.110476	1.03599	1.03599	-5.49509
ENST00000451767	ENSG00000089101	CFAP61	0.000117894	0.00333456	-3.80316	0.987714	2.45605	5.805	0.707779	1.24338	1.00895	1.24338	-5.4868
ENST00000398540	ENSG00000114541	FRMD4B	3.24143e-33	2.23966e-30	-3.78841	0.315501	5.89051	4.11233	0.16558	-0.151874	0.0335022	0.0335022	-5.46551
ENST00000629696	ENSG00000273936	TNFRSF14	3.83672e-06	0.000160964	-3.78668	0.819622	2.01216	4.3401	0.226886	0.0569098	1.11667	1.11667	-5.46303
ENST00000480305	ENSG00000157873	TNFRSF14	3.83672e-06	0.000160964	-3.78668	0.819622	2.01216	4.3401	0.226886	0.0569098	1.11667	1.11667	-5.46303
ENST00000486034	ENSG00000166105	GLB1L3	6.66541e-05	0.00202756	-3.78488	0.949086	1.19929	4.21737	0.656668	-0.511521	1.14486	1.14486	-5.46043
ENST00000341411	ENSG00000137491	SLCO2B1	5.19316e-05	0.0016348	-3.77734	0.933424	1.19552	4.10768	0.598056	-0.561868	1.14451	1.14451	-5.44955
ENST00000376447	ENSG00000165105	RASEF	9.43029e-19	2.35629e-16	-3.77614	0.427085	3.97987	4.17123	0.103213	0.0101288	0.261591	0.261591	-5.44782
ENST00000429898	ENSG00000115648	MLPH	4.13019e-06	0.000172315	-3.77479	0.819765	1.97801	4.26221	0.221677	0.00122101	1.12235	1.12235	-5.44587
ENST00000569479	ENSG00000167191	GPRC5B	2.89264e-05	0.000976905	-3.76668	0.90074	3.79607	5.44453	0.687109	0.935556	0.331254	0.935556	-5.43416
ENST00000476710	ENSG00000229698	HLA-F	9.04365e-06	0.000347347	-3.76405	0.847976	1.82837	4.316	0.295654	0.0169883	1.14247	1.14247	-5.43037
ENST00000278175	ENSG00000148926	ADM	0.000454388	0.010728	-3.76002	1.07236	2.09123	4.60836	1.19828	-0.534441	1.10164	1.10164	-5.42456
ENST00000550929	ENSG00000050426	LETMD1	0.000924428	0.0196348	-3.75611	1.1339	1.18491	4.82442	1.42795	-0.502242	1.14349	1.14349	-5.41891
ENST00000379962	ENSG00000086717	PPEF1	9.7891e-06	0.000372806	-3.74644	0.847271	2.4915	5.06421	0.435475	0.794153	1.00026	1.00026	-5.40497
ENST00000406935	ENSG00000004846	ABCB5	2.7527e-06	0.000119406	-3.74643	0.799074	1.18007	4.35173	0.134025	0.264426	1.14301	1.14301	-5.40495
ENST00000353887	ENSG00000186575	NF2	0.000291847	0.00734081	-3.74378	1.0335	1.17874	4.01885	0.993361	-0.976668	1.14288	1.14288	-5.40113
ENST00000514829	ENSG00000109794	FAM149A	1.10246e-05	0.000414497	-3.74181	0.851178	1.17776	4.03276	0.306221	-0.268383	1.14279	1.14279	-5.39828
ENST00000527717	ENSG00000137726	FXYD6	4.80887e-06	0.000197347	-3.73694	0.817181	2.74018	4.57719	0.405507	0.279647	0.930064	0.930064	-5.39126
ENST00000520904	ENSG00000056998	GYG2	3.37986e-05	0.00111858	-3.73423	0.900631	2.00795	4.44836	0.504873	0.0367234	1.1174	1.1174	-5.38735
ENST00000462888	ENSG00000114541	FRMD4B	1.10164e-06	5.17664e-05	-3.73272	0.766071	1.17321	3.98755	0.0313934	-0.02366	1.14234	1.14234	-5.38518
ENST00000402357	ENSG00000219438	FAM19A5	4.5853e-05	0.00146041	-3.7253	0.914	2.13658	4.69085	0.579072	0.26764	1.09172	1.09172	-5.37446
ENST00000476195	ENSG00000036549	AC118549.1	2.84717e-06	0.000123032	-3.71188	0.792875	2.28862	4.80905	0.205961	0.811903	1.05134	1.05134	-5.35511
ENST00000420456	ENSG00000145979	TBC1D7	1.22977e-05	0.000456649	-3.68642	0.843142	2.39996	5.10144	0.206949	1.21483	1.02268	1.21483	-5.31838
ENST00000621877	ENSG00000273936	TNFRSF14	1.37823e-24	5.62193e-22	-3.68308	0.359842	5.51999	4.09771	0.11164	0.147333	0.0433894	0.147333	-5.31355
ENST00000355716	ENSG00000157873	TNFRSF14	1.37823e-24	5.62193e-22	-3.68308	0.359842	5.51999	4.09771	0.11164	0.147333	0.0433894	0.147333	-5.31355
ENST00000581601	ENSG00000081138	CDH7	1.41326e-06	6.4747e-05	-3.67853	0.762686	1.14612	3.90694	0.0238319	0.0237414	1.13955	1.13955	-5.30699
ENST00000315264	ENSG00000066735	KIF26A	3.86721e-06	0.000162142	-3.6765	0.796057	2.08893	4.46921	0.165293	0.543222	1.10212	1.10212	-5.30407
ENST00000378069	ENSG00000069535	MAOB	1.8673e-06	8.35692e-05	-3.66417	0.768609	1.94559	4.25928	0.0541851	0.439582	1.12733	1.12733	-5.28628
ENST00000477573	ENSG00000022277	RTF2	3.09218e-47	4.75866e-44	-3.66114	0.25362	5.14482	3.9143	0.0664564	0.0322492	0.0621895	0.0621895	-5.2819
ENST00000441322	ENSG00000237289	CKMT1B	1.94772e-06	8.67669e-05	-3.65625	0.768318	3.1956	3.94998	0.484454	-0.332205	0.69617	0.69617	-5.27485
ENST00000361588	ENSG00000132692	BCAN	8.1788e-06	0.000316825	-3.64923	0.81813	2.06991	4.04439	0.232702	0.0467936	1.10597	1.10597	-5.26472
ENST00000354228	ENSG00000125354	2006-09-01	0.000960508	0.0202929	-3.64349	1.10347	2.34634	4.78166	1.39918	-0.245582	1.03611	1.03611	-5.25644
ENST00000574882	ENSG00000182612	TSPAN10	1.00613e-05	0.000381242	-3.64215	0.824789	2.81171	4.6677	0.456347	0.567551	0.904208	0.904208	-5.25451
ENST00000388918	ENSG00000107165	TYRP1	3.80238e-06	0.00015982	-3.64003	0.787562	1.33354	3.91092	0.0849772	0.061155	1.15553	1.15553	-5.25145
ENST00000562961	ENSG00000197006	METTL9	6.47283e-07	3.20391e-05	-3.62658	0.728733	3.16727	4.66811	0.251822	0.810283	0.715123	0.810283	-5.23204
ENST00000548803	ENSG00000185664	PMEL	2.23684e-05	0.000777133	-3.62274	0.854454	2.37687	4.78697	0.43178	0.778259	1.0284	1.0284	-5.22651
ENST00000395184	ENSG00000138639	ARHGAP24	4.68996e-05	0.00149164	-3.60334	0.885218	2.14632	4.38833	0.477766	0.313946	1.08946	1.08946	-5.19851
ENST00000475320	ENSG00000158089	GALNT14	3.67037e-05	0.0011989	-3.6023	0.872796	1.37555	3.88118	0.3656	-0.163066	1.15795	1.15795	-5.19701
ENST00000512986	ENSG00000052795	FNIP2	8.36907e-05	0.00247141	-3.59283	0.913375	2.45228	5.11827	0.539731	1.12878	1.00988	1.12878	-5.18335
ENST00000479641	ENSG00000184381	PLA2G6	1.05118e-05	0.000397203	-3.58121	0.812736	2.368	4.79666	0.183736	1.13734	1.03062	1.13734	-5.16659
ENST00000483315	ENSG00000159079	C21orf59	0.00109466	0.0226397	-3.58121	1.09685	1.09746	3.77718	1.27205	-1.14038	1.13411	1.13411	-5.16659
ENST00000442415	ENSG00000132155	RAF1	0.000462576	0.0109061	-3.57059	1.01972	1.80604	4.82234	0.934721	0.441649	1.14493	1.14493	-5.15126
ENST00000620436	ENSG00000108932	SLC16A6	2.35284e-05	0.000812018	-3.55435	0.840574	1.08403	3.92885	0.280625	0.0919075	1.13251	1.13251	-5.12783
ENST00000382306	ENSG00000205944	DAZ2	0.00103537	0.021605	-3.54637	1.08097	1.73821	4.38179	1.18524	-0.265402	1.15174	1.15174	-5.11633
ENST00000431946	ENSG00000135596	MICAL1	8.4648e-06	0.000326969	-3.54624	0.796357	2.05505	4.42763	0.159506	0.814124	1.10886	1.10886	-5.11614
ENST00000436120	ENSG00000189164	ZNF527	4.95271e-05	0.00156858	-3.53417	0.870946	1.07394	3.59232	0.38582	-0.358219	1.13127	1.13127	-5.09872
ENST00000376143	ENSG00000102466	FGF14	1.11651e-05	0.000419082	-3.52755	0.802941	1.2773	3.66451	0.137901	-0.0105053	1.15153	1.15153	-5.08917
ENST00000392054	ENSG00000153823	PID1	0.000223997	0.0058663	-3.52606	0.955497	1.4227	3.86976	0.665958	-0.295604	1.15999	1.15999	-5.08703
ENST00000432037	ENSG00000144218	AFF3	1.75266e-05	0.000622982	-3.51974	0.819637	1.44036	3.68589	0.183045	-0.0123784	1.16056	1.16056	-5.07791
ENST00000359512	ENSG00000182484	WASH6P	0.000224994	0.0058868	-3.51664	0.953235	1.06517	3.58619	0.68713	-0.625491	1.13018	1.13018	-5.07343
ENST00000606530	ENSG00000145979	TBC1D7	7.58737e-06	0.000296459	-3.50581	0.783156	1.55964	4.02683	0.0652171	0.535858	1.16145	1.16145	-5.05781
ENST00000560801	ENSG00000134160	TRPM1	7.57623e-05	0.00227196	-3.49731	0.883734	1.05551	3.59609	0.433015	-0.314645	1.12896	1.12896	-5.04555
ENST00000380956	ENSG00000137265	IRF4	5.93494e-125	8.03745e-121	-3.49305	0.146916	6.04253	3.52312	0.00929738	0.0338712	0.0307656	0.0338712	-5.03941
ENST00000629542	ENSG00000273936	TNFRSF14	9.13455e-07	4.3589e-05	-3.49189	0.711263	2.65343	4.02164	0.054449	0.573038	0.95734	0.95734	-5.03773
ENST00000435221	ENSG00000157873	TNFRSF14	9.13455e-07	4.3589e-05	-3.49189	0.711263	2.65343	4.02164	0.054449	0.573038	0.95734	0.95734	-5.03773
ENST00000547137	ENSG00000185664	PMEL	3.01694e-18	7.24419e-16	-3.48525	0.400106	6.26935	3.60074	0.292546	-0.140674	0.027623	0.027623	-5.02815
ENST00000465994	ENSG00000112186	CAP2	0.000833281	0.0179294	-3.4819	1.04202	1.54973	4.00463	1.01002	-0.37916	1.16159	1.16159	-5.02332
ENST00000487252	ENSG00000169871	TRIM56	0.000800296	0.0173188	-3.47944	1.0378	1.6125	4.04323	0.994032	-0.312427	1.16004	1.16004	-5.01976
ENST00000482528	ENSG00000115648	MLPH	7.59998e-06	0.00029678	-3.47453	0.776232	1.04412	3.47605	0.0775868	-0.0463172	1.12748	1.12748	-5.01269
ENST00000258526	ENSG00000136040	PLXNC1	4.36797e-121	3.6971e-117	-3.46733	0.148182	6.1404	3.45617	0.014626	0.0101231	0.02929	0.02929	-5.00229
ENST00000524835	ENSG00000100926	TM9SF1	0.000430971	0.0102755	-3.46704	0.984856	1.04037	3.51921	0.812888	-0.713934	1.12699	1.12699	-5.00188
ENST00000360509	ENSG00000166415	WDR72	0.00020197	0.00537789	-3.45427	0.929431	1.03399	3.53368	0.601538	-0.456238	1.12615	1.12615	-4.98345
ENST00000545868	ENSG00000166206	GABRB3	0.000483359	0.0113212	-3.45346	0.989584	2.38646	4.42728	0.932535	0.257155	1.02602	1.02602	-4.98229
ENST00000456174	ENSG00000048052	HDAC9	0.000104981	0.0030185	-3.44355	0.887791	3.33083	4.71929	0.972627	0.58054	0.603719	0.603719	-4.96799
ENST00000585510	ENSG00000105679	GAPDHS	8.59682e-05	0.00253314	-3.43925	0.875769	2.46182	4.65624	0.526401	0.963055	1.00754	1.00754	-4.96179
ENST00000527820	ENSG00000158555	GDPD5	0.00104353	0.0217366	-3.43159	1.04669	1.53993	4.04305	1.02943	-0.237798	1.16168	1.16168	-4.95073
ENST00000543233	ENSG00000179242	CDH4	1.53201e-05	0.000554448	-3.42519	0.792128	1.01945	3.36174	0.130752	-0.119363	1.12418	1.12418	-4.9415
ENST00000522202	ENSG00000163517	HDAC11	0.00114194	0.023517	-3.42138	1.05176	1.01754	3.42831	1.08849	-0.990745	1.12392	1.12392	-4.93601
ENST00000398523	ENSG00000169302	STK32A	0.000194567	0.00520535	-3.40487	0.913821	2.13215	4.46064	0.577405	0.762306	1.09273	1.09273	-4.91218
ENST00000324581	ENSG00000167306	MYO5B	6.52688e-05	0.00199079	-3.3898	0.848955	1.60535	3.50708	0.281148	-0.0197911	1.1603	1.1603	-4.89044
ENST00000393515	ENSG00000230006	ANKRD36BP2	3.41161e-05	0.0011257	-3.38738	0.8174	1.7088	3.67049	0.181946	0.275503	1.15434	1.15434	-4.88696
ENST00000625695	ENSG00000273936	TNFRSF14	0.000174759	0.00473149	-3.38239	0.90126	1.43578	3.646	0.464113	-0.0239655	1.16042	1.16042	-4.87976
ENST00000409119	ENSG00000157873	TNFRSF14	0.000174759	0.00473149	-3.38239	0.90126	1.43578	3.646	0.464113	-0.0239655	1.16042	1.16042	-4.87976
ENST00000340147	ENSG00000185056	C5orf47	1.44677e-05	0.000526693	-3.38136	0.77972	1.59992	4.00252	0.0554412	0.80296	1.16048	1.16048	-4.87827
ENST00000534464	ENSG00000148926	ADM	0.00143478	0.0283992	-3.37959	1.06024	1.94028	3.94568	1.12012	-0.324041	1.12811	1.12811	-4.87572
ENST00000356450	ENSG00000122824	NUDT10	9.82068e-06	0.000373589	-3.37241	0.762802	2.29831	3.6644	0.115026	0.369054	1.04871	1.04871	-4.86536
ENST00000441662	ENSG00000026751	SLAMF7	0.000433157	0.0103167	-3.36632	0.956608	0.990011	3.74925	0.710163	-0.1134	1.12003	1.12003	-4.85656
ENST00000409579	ENSG00000144218	AFF3	0.000321216	0.00795555	-3.3651	0.935383	1.25264	3.50746	0.600322	-0.28291	1.14956	1.14956	-4.85481
ENST00000297146	ENSG00000164604	GPR85	3.03857e-05	0.00101958	-3.34521	0.802102	1.74635	3.5795	0.135765	0.310162	1.15097	1.15097	-4.82612
ENST00000261381	ENSG00000103489	XYLT1	1.81232e-22	6.13589e-20	-3.34315	0.342824	5.55069	3.39481	0.017069	0.217988	0.0423453	0.217988	-4.82314
ENST00000390689	ENSG00000184351	KRTAP19-1	1.295e-05	0.000477606	-3.33535	0.764823	0.97453	3.21944	0.0521455	-0.00433486	1.11776	1.11776	-4.8119
ENST00000490039	ENSG00000004866	ST7	0.000808183	0.0174671	-3.32837	0.99355	1.63247	3.94427	0.815083	0.09388	1.1592	1.1592	-4.80182
ENST00000276500	ENSG00000147509	RGS20	3.85006e-05	0.00125067	-3.32047	0.806664	3.14827	4.25323	0.573755	0.713167	0.727659	0.727659	-4.79042
ENST00000623960	ENSG00000277117	FP565260.3	9.33103e-05	0.00272694	-3.31272	0.847816	1.57652	3.78428	0.276456	0.480496	1.16113	1.16113	-4.77924
ENST00000379164	ENSG00000168843	FSTL5	1.5467e-05	0.000559167	-3.31083	0.766053	0.962266	3.17601	0.0577532	-0.00626427	1.11592	1.11592	-4.77651
ENST00000317233	ENSG00000144218	AFF3	2.18264e-14	3.53572e-12	-3.30426	0.43253	4.44032	3.24998	0.222589	-0.0703236	0.151575	0.151575	-4.76704
ENST00000555019	ENSG00000100628	ASB2	2.45562e-05	0.000842763	-3.30206	0.782693	2.26614	4.16549	0.0645084	1.16071	1.05759	1.16071	-4.76386
ENST00000612647	ENSG00000278693	ASB2	2.45562e-05	0.000842763	-3.30206	0.782693	2.26614	4.16549	0.0645084	1.16071	1.05759	1.16071	-4.76386
ENST00000320248	ENSG00000176595	KBTBD11	7.77987e-08	4.62104e-06	-3.30167	0.614589	4.28369	3.23926	0.57138	-0.425926	0.18406	0.18406	-4.7633
ENST00000483048	ENSG00000076356	PLXNA2	3.20293e-05	0.00106523	-3.28522	0.789995	1.15614	3.22537	0.107586	0.0577832	1.1406	1.1406	-4.73957
ENST00000416436	ENSG00000145979	TBC1D7	0.000145608	0.00403137	-3.28219	0.864089	2.88886	3.30265	0.621084	-0.358926	0.872216	0.872216	-4.7352
ENST00000282469	ENSG00000152582	SPEF2	6.47834e-05	0.00197687	-3.27557	0.819985	0.944639	3.59787	0.231551	0.389505	1.1132	1.1132	-4.72565
ENST00000479938	ENSG00000223572	CKMT1A	4.329e-05	0.00138792	-3.26449	0.798324	1.15244	3.15266	0.134429	-0.00862201	1.14021	1.14021	-4.70966
ENST00000486564	ENSG00000158089	GALNT14	0.000362424	0.00879914	-3.25899	0.913898	0.936348	3.16024	0.558526	-0.411916	1.11189	1.11189	-4.70173
ENST00000492157	ENSG00000106772	PRUNE2	0.000459064	0.0108271	-3.25841	0.930025	1.31527	3.31945	0.575579	-0.241964	1.15431	1.15431	-4.70089
ENST00000469442	ENSG00000168874	ATOH8	1.23392e-05	0.000457822	-3.25536	0.744678	2.79823	3.92915	0.199745	0.851799	0.909344	0.909344	-4.69649
ENST00000530826	ENSG00000154027	AK5	8.96992e-05	0.00263391	-3.2424	0.827801	1.35562	3.45871	0.213641	0.317125	1.15687	1.15687	-4.67779
ENST00000400577	ENSG00000185272	RBM11	0.0010156	0.0212711	-3.24199	0.986557	1.85934	3.51723	0.807727	-0.207797	1.13886	1.13886	-4.67721
ENST00000619906	ENSG00000100077	GRK3	1.37921e-08	9.46267e-07	-3.23467	0.56989	4.40817	3.13463	0.491706	-0.322336	0.157844	0.157844	-4.66664
ENST00000482341	ENSG00000120215	MLANA	9.88974e-05	0.00286052	-3.22045	0.827181	1.79373	3.51765	0.222223	0.424601	1.14623	1.14623	-4.64612
ENST00000468154	ENSG00000113905	HRG	8.01135e-05	0.00238135	-3.2197	0.816341	1.70485	3.23665	0.17817	0.14244	1.15466	1.15466	-4.64504
ENST00000304411	ENSG00000170837	GPR27	4.00187e-05	0.00129469	-3.21484	0.782699	1.09174	3.03485	0.091805	0.00379176	1.13343	1.13343	-4.63802
ENST00000562348	ENSG00000167191	GPRC5B	0.00015487	0.00426116	-3.20399	0.846915	3.25466	4.1626	0.537979	0.896549	0.655974	0.896549	-4.62237
ENST00000285393	ENSG00000147614	ATP6V0D2	3.73068e-20	1.05256e-17	-3.18021	0.345842	4.38219	2.90911	0.0761513	-0.0534217	0.163061	0.163061	-4.58806
ENST00000610164	ENSG00000164604	GPR85	8.64148e-05	0.00254434	-3.17341	0.808332	1.38648	3.04969	0.148318	0.052803	1.15848	1.15848	-4.57826
ENST00000556802	ENSG00000185664	PMEL	3.38475e-05	0.00111965	-3.16905	0.764382	4.49906	3.00223	1.02791	-0.872938	0.140652	0.140652	-4.57198
ENST00000424866	ENSG00000106772	PRUNE2	9.55184e-05	0.00278306	-3.16663	0.811603	1.13974	3.003	0.178533	-0.017557	1.13887	1.13887	-4.56848
ENST00000433139	ENSG00000168824	NSG1	0.000145626	0.00403137	-3.16509	0.833266	1.15421	3.03149	0.248265	-0.0507871	1.1404	1.1404	-4.56625
ENST00000546687	ENSG00000089169	RPH3A	0.00010922	0.00312903	-3.1646	0.817907	1.1567	2.99208	0.197288	-0.0447477	1.14066	1.14066	-4.56555
ENST00000237449	ENSG00000115423	DNAH6	9.81315e-05	0.00284451	-3.16388	0.812258	1.37037	3.08446	0.161851	0.0999733	1.15768	1.15768	-4.56451
ENST00000586475	ENSG00000171827	ZNF570	0.00185871	0.0352036	-3.15758	1.01467	0.885644	2.91898	0.955629	-0.873595	1.10349	1.10349	-4.55543
ENST00000409882	ENSG00000115339	GALNT3	2.05069e-05	0.000719472	-3.15728	0.741268	3.74763	3.79009	0.322561	0.776395	0.353563	0.776395	-4.55499
ENST00000493380	ENSG00000151474	FRMD4A	5.67796e-05	0.00176317	-3.13335	0.778315	1.051	2.87076	0.0831711	-0.00657645	1.12838	1.12838	-4.52046
ENST00000428109	ENSG00000145979	TBC1D7	2.17248e-05	0.000757884	-3.13294	0.737789	3.05044	3.73751	0.153693	0.934973	0.788948	0.934973	-4.51987
ENST00000523064	ENSG00000147509	RGS20	3.33804e-05	0.00110744	-3.12142	0.752315	2.88719	3.75404	0.0512154	1.08074	0.87296	1.08074	-4.50326
ENST00000549324	ENSG00000089169	RPH3A	0.000111827	0.00318559	-3.1115	0.805383	2.98025	3.87808	0.419451	0.877831	0.828081	0.877831	-4.48895
ENST00000328737	ENSG00000065413	ANKRD44	0.000446184	0.0105675	-3.11086	0.885996	2.44086	3.33678	0.557316	0.109785	1.01266	1.01266	-4.48802
ENST00000549025	ENSG00000185046	ANKS1B	0.00114273	0.0235261	-3.10387	0.954213	2.02463	3.07993	0.706558	-0.324635	1.11449	1.11449	-4.47793
ENST00000329117	ENSG00000132692	BCAN	0.0013313	0.0267416	-3.08751	0.962098	1.26381	3.03718	0.700799	-0.335008	1.15047	1.15047	-4.45434
ENST00000481955	ENSG00000224776	RPSAP50	9.32191e-05	0.00272545	-3.0808	0.788414	1.44572	2.94783	0.0824785	0.19287	1.16072	1.16072	-4.44466
ENST00000356865	ENSG00000206190	ATP10A	2.35541e-24	9.32702e-22	-3.07939	0.302398	4.8019	2.86609	0.0696865	0.113202	0.094975	0.113202	-4.44262
ENST00000546543	ENSG00000185664	PMEL	6.12055e-07	3.04736e-05	-3.07575	0.616707	5.01311	2.86987	0.68796	-0.493191	0.0726958	0.0726958	-4.43737
ENST00000443026	ENSG00000004846	ABCB5	5.35029e-05	0.00167646	-3.05413	0.756015	2.92345	2.84997	0.286775	-0.0710459	0.856344	0.856344	-4.40618
ENST00000484221	ENSG00000026751	SLAMF7	0.000252641	0.00649389	-3.05375	0.834456	2.33438	3.14786	0.353449	0.210599	1.03918	1.03918	-4.40562
ENST00000549404	ENSG00000185664	PMEL	6.29566e-11	6.44929e-09	-3.04625	0.466033	6.994	3.02364	0.0198065	0.414567	0.0218628	0.414567	-4.3948
ENST00000264735	ENSG00000127252	HRASLS	9.13989e-06	0.000350646	-3.04293	0.685873	3.226	2.85475	0.265282	-0.0212252	0.675562	0.675562	-4.39002
ENST00000263735	ENSG00000119888	EPCAM	0.000235259	0.00611284	-3.04278	0.827339	1.28208	3.03238	0.217083	0.234518	1.1519	1.1519	-4.3898
ENST00000396204	ENSG00000198963	RORB	0.000612691	0.0138614	-3.03439	0.885713	0.82405	2.71406	0.476658	-0.379434	1.09232	1.09232	-4.3777
ENST00000532435	ENSG00000158555	GDPD5	0.000441461	0.0104739	-3.03408	0.863433	1.74976	3.35577	0.34039	0.506125	1.15064	1.15064	-4.37725
ENST00000361360	ENSG00000198914	POU3F3	6.10647e-05	0.00187949	-3.03163	0.756271	2.30113	3.1287	0.095944	0.49061	1.04795	1.04795	-4.37372
ENST00000524395	ENSG00000182307	C8orf33	0.00116022	0.0238058	-3.02296	0.930576	1.2278	3.1222	0.584496	0.0119744	1.14745	1.14745	-4.36121
ENST00000452794	ENSG00000184381	PLA2G6	1.7139e-09	1.36694e-07	-3.01849	0.501174	4.04509	2.69027	0.259871	-0.158308	0.242479	0.242479	-4.35475
ENST00000477835	ENSG00000157680	DGKI	0.000278429	0.00705586	-3.01076	0.828364	1.83569	3.29021	0.230729	0.586299	1.14164	1.14164	-4.3436
ENST00000550464	ENSG00000185664	PMEL	8.08183e-06	0.000313608	-3.00992	0.674415	6.80647	3.36817	0.296148	0.613522	0.0229033	0.613522	-4.34239
ENST00000475850	ENSG00000186654	PRR5	0.000392471	0.00943729	-3.0081	0.848524	1.75361	3.14503	0.289715	0.363263	1.15027	1.15027	-4.33977
ENST00000373012	ENSG00000185668	POU3F1	1.2071e-05	0.000449597	-3.00265	0.686115	3.24554	2.77946	0.27929	-0.0418787	0.662219	0.662219	-4.3319
ENST00000464741	ENSG00000182771	GRID1	0.000204821	0.005433	-2.9959	0.806868	0.982893	2.65265	0.183074	-0.0801132	1.119	1.119	-4.32216
ENST00000306318	ENSG00000168505	GBX2	1.05179e-09	8.68535e-08	-2.98667	0.48951	3.99213	2.8364	0.221461	0.114271	0.257779	0.257779	-4.30885
ENST00000449207	ENSG00000126856	PRDM7	3.61427e-08	2.30012e-06	-2.98174	0.541274	3.91972	2.7333	0.304167	-0.0789036	0.281789	0.281789	-4.30173
ENST00000552352	ENSG00000089169	RPH3A	3.57057e-05	0.00117366	-2.96351	0.716925	2.60615	3.14873	0.0572572	0.68879	0.970706	0.970706	-4.27544
ENST00000626951	ENSG00000169302	STK32A	7.91312e-08	4.69606e-06	-2.95315	0.550027	3.58377	2.72719	0.164255	0.110438	0.440804	0.440804	-4.26049
ENST00000526182	ENSG00000178104	PDE4DIP	0.00013239	0.00370587	-2.95309	0.772662	3.01297	3.51508	0.0508327	1.14318	0.810451	1.14318	-4.26041
ENST00000599893	ENSG00000189190	ZNF600	0.000174387	0.00472519	-2.95236	0.786562	0.78303	2.55515	0.153076	-0.0775384	1.08428	1.08428	-4.25935
ENST00000398341	ENSG00000160190	SLC37A1	0.000510926	0.011846	-2.94335	0.847015	1.66805	2.68791	0.277606	-0.0294663	1.15726	1.15726	-4.24635
ENST00000360870	ENSG00000155657	TTN	9.6039e-05	0.00279342	-2.93205	0.751734	0.77288	2.84295	0.0479883	0.403135	1.08222	1.08222	-4.23006
ENST00000452972	ENSG00000184381	PLA2G6	0.000174877	0.00473278	-2.92139	0.778457	2.38841	2.97946	0.186458	0.444743	1.02553	1.02553	-4.21467
ENST00000496409	ENSG00000184381	PLA2G6	7.16761e-08	4.28368e-06	-2.91441	0.541017	4.03137	2.55561	0.339137	-0.188854	0.246261	0.246261	-4.20461
ENST00000621162	ENSG00000274749	KRTAP7-1	0.000108503	0.00311315	-2.9074	0.75112	0.760551	2.62202	0.0486895	0.192679	1.07967	1.07967	-4.19448
ENST00000550762	ENSG00000185664	PMEL	1.2614e-16	2.56497e-14	-2.89301	0.349517	5.14469	2.60071	0.0216636	0.222661	0.0621992	0.222661	-4.17373
ENST00000327773	ENSG00000183087	GAS6	0.000414431	0.00990647	-2.89144	0.818937	2.45529	2.96377	0.332176	0.338753	1.00914	1.00914	-4.17146
ENST00000613922	ENSG00000277632	CCL3	0.00040615	0.0097282	-2.88825	0.816799	1.1038	2.69601	0.199474	0.165214	1.13485	1.13485	-4.16686
ENST00000325921	ENSG00000126856	PRDM7	1.86543e-19	4.97298e-17	-2.88732	0.32007	5.58736	2.55751	0.0294191	0.17547	0.0411606	0.17547	-4.16552
ENST00000564210	ENSG00000126856	PRDM7	0.000437673	0.0104023	-2.88325	0.819978	2.51839	3.03305	0.351147	0.416364	0.993579	0.993579	-4.15965
ENST00000548493	ENSG00000185664	PMEL	4.89518e-13	6.8485e-11	-2.87736	0.398075	9.69109	2.63714	0.00216695	0.314761	0.039447	0.314761	-4.15115
ENST00000612769	ENSG00000276253	AC243790.1	0.000649776	0.0145883	-2.87471	0.843038	1.29492	2.89629	0.268568	0.355787	1.15286	1.15286	-4.14732
ENST00000487331	ENSG00000189367	KIAA0408	0.00075329	0.0164328	-2.871	0.852078	1.24402	2.98553	0.303232	0.432336	1.14884	1.14884	-4.14198
ENST00000492289	ENSG00000186654	PRR5	0.000323606	0.0080089	-2.86527	0.796875	0.978626	2.50071	0.151649	0.0292529	1.11837	1.11837	-4.13371
ENST00000550590	ENSG00000185664	PMEL	4.23942e-17	8.97075e-15	-2.86073	0.340317	5.71846	2.53677	0.0271329	0.204498	0.0374224	0.204498	-4.12716
ENST00000618462	ENSG00000178104	PDE4DIP	2.93248e-09	2.2336e-07	-2.85091	0.480328	5.56347	2.45296	0.419506	-0.266951	0.0419248	0.0419248	-4.11299
ENST00000491986	ENSG00000184381	PLA2G6	5.80932e-07	2.90307e-05	-2.84171	0.568632	3.8303	2.3621	0.330202	-0.266187	0.316482	0.316482	-4.09972
ENST00000361069	ENSG00000050555	LAMC3	3.31244e-08	2.11999e-06	-2.83831	0.513807	4.04357	2.43483	0.285105	-0.129799	0.242891	0.242891	-4.09481
ENST00000616794	ENSG00000170370	EMX2	0.000241504	0.00625353	-2.83618	0.772568	2.87561	3.18786	0.315681	0.722192	0.878041	0.878041	-4.09174
ENST00000528923	ENSG00000166833	NAV2	0.000710201	0.0156473	-2.83428	0.837155	1.50078	2.67574	0.239971	0.204008	1.16169	1.16169	-4.089
ENST00000266086	ENSG00000100191	SLC5A4	7.70624e-10	6.56368e-08	-2.83216	0.460449	6.49261	2.65521	0.00488855	0.419139	0.0253125	0.419139	-4.08594
ENST00000336985	ENSG00000186654	PRR5	1.58068e-05	0.000570233	-2.82431	0.65421	4.36604	2.44853	0.689608	-0.491907	0.166373	0.166373	-4.07462
ENST00000550314	ENSG00000111424	VDR	0.000200348	0.00533891	-2.82355	0.75931	2.44389	3.23685	0.141182	0.977654	1.01192	1.01192	-4.07352
ENST00000436015	ENSG00000183354	KIAA2026	0.000139731	0.00388885	-2.8152	0.739162	2.75546	3.20101	0.113695	0.979026	0.924823	0.979026	-4.06148
ENST00000490473	ENSG00000184381	PLA2G6	6.32778e-13	8.76223e-11	-2.80902	0.390509	4.18313	2.29915	0.0975632	-0.0454168	0.207432	0.207432	-4.05256
ENST00000331569	ENSG00000183779	ZNF703	2.74853e-49	4.65279e-46	-2.80284	0.189925	5.93793	2.30638	0.00884174	0.0633013	0.0325837	0.0633013	-4.04364
ENST00000381154	ENSG00000006756	ARSD	0.00089672	0.0191198	-2.79782	0.842446	1.41928	2.54253	0.259564	0.0974444	1.15987	1.15987	-4.03641
ENST00000395149	ENSG00000006042	TMEM98	0.000764616	0.0166317	-2.79556	0.830702	2.80295	2.58042	0.472569	-0.0671279	0.907563	0.907563	-4.03313
ENST00000454670	ENSG00000184381	PLA2G6	0.000182924	0.00491911	-2.78974	0.745621	3.17061	2.36961	0.398997	-0.228675	0.712903	0.712903	-4.02474
ENST00000443149	ENSG00000183354	KIAA2026	0.000437999	0.0104047	-2.7889	0.793188	2.72205	2.44125	0.32219	-0.0667193	0.936106	0.936106	-4.02353
ENST00000351817	ENSG00000125816	NKX2-4	0.000251142	0.0064624	-2.78783	0.761475	2.91978	2.26958	0.301615	-0.244434	0.858073	0.858073	-4.02199
ENST00000367009	ENSG00000054392	HHAT	0.000794598	0.017212	-2.77722	0.827868	3.46785	2.41881	0.858505	-0.607547	0.512227	0.512227	-4.00669
ENST00000629127	ENSG00000280680	HHAT	0.000794598	0.017212	-2.77722	0.827868	3.46785	2.41881	0.858505	-0.607547	0.512227	0.512227	-4.00669
ENST00000261769	ENSG00000039068	CDH1	8.09871e-14	2.37422e-12	-2.77545	0.37161	3.62393	2.29204	0.211838	-0.105499	0.0643503	0.0643503	-4.00412
ENST00000495879	ENSG00000144724	PTPRG	9.88098e-05	0.00285928	-2.76754	0.710812	2.6891	3.05403	0.0639012	0.946036	0.946605	0.946605	-3.99272
ENST00000327268	ENSG00000108932	SLC16A6	1.66913e-27	8.49788e-25	-2.76671	0.254615	7.97703	2.29819	0.00107137	0.128586	0.0206584	0.128586	-3.99152
ENST00000298049	ENSG00000101210	EEF1A2	4.2277e-05	0.00135866	-2.7604	0.674144	3.84608	2.38891	0.59899	-0.351858	0.30995	0.30995	-3.98241
ENST00000530015	ENSG00000137491	SLCO2B1	0.000536901	0.0123674	-2.74979	0.794362	2.2213	2.75014	0.19167	0.496377	1.07035	1.07035	-3.96711
ENST00000609841	ENSG00000215146	BX322639.1	1.36284e-06	6.27343e-05	-2.7456	0.568404	3.57099	2.17689	0.197842	-0.170904	0.448325	0.448325	-3.96106
ENST00000479369	ENSG00000178104	PDE4DIP	0.000599533	0.0135909	-2.73864	0.798013	1.86979	2.84155	0.136063	0.679031	1.13759	1.13759	-3.95102
ENST00000622311	ENSG00000230006	ANKRD36BP2	0.000243003	0.00628272	-2.73244	0.744631	2.75715	3.01097	0.184718	0.839333	0.924234	0.924234	-3.94208
ENST00000550447	ENSG00000185664	PMEL	3.7178e-16	7.17218e-14	-2.72076	0.333941	4.75036	2.27648	0.121492	0.0668915	0.101542	0.101542	-3.92522
ENST00000449260	ENSG00000185664	PMEL	9.01945e-24	3.39297e-21	-2.7203	0.270628	8.07699	2.23985	0.0264058	0.120073	0.0209189	0.120073	-3.92456
ENST00000505802	ENSG00000272442	AL353588.1	1.60012e-11	1.80282e-09	-2.7041	0.40129	4.38161	2.13734	0.158887	-0.102712	0.163181	0.163181	-3.90119
ENST00000348721	ENSG00000114737	CISH	0.00110899	0.0229013	-2.69974	0.82781	1.80247	2.41558	0.225228	0.163413	1.14531	1.14531	-3.8949
ENST00000267460	ENSG00000139946	PELI2	3.06885e-09	2.3244e-07	-2.67901	0.451934	3.835	2.08459	0.0939723	-0.0543127	0.314517	0.314517	-3.86499
ENST00000589070	ENSG00000184640	2009-09-01	0.000666279	0.0148897	-2.66663	0.783589	2.18633	2.57441	0.148389	0.484796	1.07964	1.07964	-3.84713
ENST00000340356	ENSG00000203883	SOX18	0.000648163	0.0145617	-2.66423	0.781157	2.11724	2.50224	0.124337	0.428906	1.09607	1.09607	-3.84366
ENST00000330055	ENSG00000184160	ADRA2C	0.000707698	0.0156092	-2.651	0.782796	2.25808	2.64883	0.165647	0.582057	1.05989	1.05989	-3.82458
ENST00000259526	ENSG00000136999	NOV	0.000721708	0.0158511	-2.64733	0.782956	2.08555	2.67491	0.123222	0.661387	1.10282	1.10282	-3.81928
ENST00000582867	ENSG00000108932	SLC16A6	0.00141925	0.0281576	-2.63131	0.82468	1.31098	2.31419	0.20618	0.185772	1.15401	1.15401	-3.79618
ENST00000397936	ENSG00000169302	STK32A	6.14669e-06	0.000246047	-2.62887	0.581444	4.7842	2.55412	0.0315715	0.644584	0.0971774	0.644584	-3.79266
ENST00000395864	ENSG00000101144	BMP7	1.19194e-06	5.52806e-05	-2.62181	0.539803	4.59714	2.09279	0.458832	-0.308542	0.123944	0.123944	-3.78247
ENST00000271751	ENSG00000143473	KCNH1	3.45691e-08	2.20412e-06	-2.61036	0.473186	3.98744	2.06119	0.188583	-0.0551858	0.259227	0.259227	-3.76595
ENST00000409359	ENSG00000136002	ARHGEF4	0.000267952	0.00683641	-2.60679	0.715273	3.02716	2.20129	0.220765	0.0822961	0.802466	0.802466	-3.76079
ENST00000331238	ENSG00000185924	RTN4RL1	0.00120682	0.0246285	-2.59913	0.80288	1.27749	2.20248	0.137688	0.180043	1.15154	1.15154	-3.74975
ENST00000377834	ENSG00000069812	HES2	0.00159668	0.0310532	-2.59873	0.823293	1.72271	2.26919	0.20246	0.193787	1.15316	1.15316	-3.74918
ENST00000439138	ENSG00000006042	TMEM98	0.000580012	0.0132237	-2.59418	0.753947	4.06123	1.95689	0.898689	-0.858897	0.238183	0.238183	-3.7426
ENST00000285879	ENSG00000155495	MAGEC1	0.00145547	0.0287366	-2.59166	0.814111	1.76637	2.217	0.176531	0.17107	1.14902	1.14902	-3.73897
ENST00000504194	ENSG00000159788	RGS12	6.09732e-06	0.00024459	-2.58592	0.571728	4.20487	2.07624	0.451527	-0.258241	0.202219	0.202219	-3.73069
ENST00000260526	ENSG00000137962	ARHGAP29	2.59256e-18	6.26965e-16	-2.58078	0.29569	4.73018	2.05287	0.0639502	0.110915	0.104244	0.110915	-3.72328
ENST00000587731	ENSG00000070540	WIPI1	1.30927e-06	6.03504e-05	-2.54776	0.526577	4.06376	1.99558	0.317044	-0.152554	0.237522	0.237522	-3.67564
ENST00000441391	ENSG00000141540	TTYH2	2.22692e-09	1.73924e-07	-2.52085	0.421523	4.52747	1.85498	0.219746	-0.173828	0.135618	0.135618	-3.63681
ENST00000463422	ENSG00000168874	ATOH8	3.8379e-10	3.43296e-08	-2.51309	0.401421	4.03081	1.95029	0.0758587	0.0942784	0.246419	0.246419	-3.62562
ENST00000403796	ENSG00000134955	SLC37A2	0.000643629	0.0144647	-2.47767	0.72605	4.83296	2.27816	0.963058	-0.351482	0.0912399	0.0912399	-3.57452
ENST00000356591	ENSG00000178878	APOLD1	6.44558e-23	2.27318e-20	-2.47447	0.251058	7.67305	1.85749	0.0065316	0.119529	0.0203065	0.119529	-3.56991
ENST00000333039	ENSG00000221890	NPTXR	3.1504e-09	2.38349e-07	-2.46075	0.415417	3.9925	1.77093	0.0874765	-0.039816	0.257666	0.257666	-3.55011
ENST00000264605	ENSG00000115648	MLPH	3.59593e-08	2.29061e-06	-2.42877	0.440824	4.06928	1.71075	0.152572	-0.123017	0.236079	0.236079	-3.50398
ENST00000332647	ENSG00000179083	FAM133A	0.000906176	0.0192956	-2.41441	0.727637	2.76042	1.99171	0.135824	0.244721	0.923088	0.923088	-3.48325
ENST00000397968	ENSG00000081138	CDH7	0.000330393	0.00813524	-2.3996	0.66837	3.27434	1.7547	0.25096	-0.123173	0.642478	0.642478	-3.46189
ENST00000379335	ENSG00000112137	PHACTR1	1.0514e-33	7.65519e-31	-2.39359	0.197811	5.2538	1.68558	0.0230537	0.0337061	0.0552047	0.0552047	-3.45321
ENST00000494559	ENSG00000121440	PDZRN3	3.28067e-07	1.71938e-05	-2.38454	0.466955	3.89352	1.86655	0.144722	0.13758	0.291372	0.291372	-3.44016
ENST00000628092	ENSG00000043462	LCP2	1.80168e-05	0.000639396	-2.36763	0.552134	4.91168	1.75216	0.527201	-0.351573	0.0825026	0.0825026	-3.41577
ENST00000463731	ENSG00000229698	HLA-F	2.49258e-06	0.000109172	-2.36699	0.502681	3.80542	1.6897	0.178243	-0.0744791	0.327135	0.327135	-3.41485
ENST00000401478	ENSG00000157851	DPYSL5	8.86874e-06	0.000341404	-2.3606	0.5313	3.98671	1.65457	0.305109	-0.232254	0.259451	0.259451	-3.40562
ENST00000445189	ENSG00000099917	MED15	0.000348478	0.0085063	-2.35683	0.659012	3.51003	1.72732	0.383151	-0.219493	0.485443	0.485443	-3.40019
ENST00000227451	ENSG00000110042	DTX4	9.11464e-15	1.5239e-12	-2.35602	0.303962	4.42668	1.64296	0.0305753	0.0359376	0.15421	0.15421	-3.39901
ENST00000493808	NA	NA	1.24999e-05	0.000463276	-2.34029	0.535697	3.48125	1.79843	0.0703131	0.202202	0.503629	0.503629	-3.37632
ENST00000315994	ENSG00000107957	SH3PXD2A	0.000139515	0.00388444	-2.33927	0.614138	5.14763	2.01357	0.69234	-0.167237	0.0619909	0.0619909	-3.37485
ENST00000242728	ENSG00000123095	BHLHE41	2.25132e-37	2.03259e-34	-2.33869	0.183063	6.48869	1.62015	0.0049787	0.0620451	0.025348	0.0620451	-3.37401
ENST00000476243	ENSG00000166582	CENPV	9.62144e-06	0.00036704	-2.30937	0.521832	3.90048	1.73777	0.255837	-0.00617569	0.28878	0.28878	-3.33172
ENST00000269346	ENSG00000141540	TTYH2	6.56751e-58	1.64706e-54	-2.3019	0.143498	6.34549	1.53739	0.0144202	0.0129554	0.0267629	0.0267629	-3.32094
ENST00000498454	ENSG00000136295	TTYH3	3.62399e-14	5.76036e-12	-2.26873	0.299548	4.53072	1.55863	0.0444059	0.0582962	0.135052	0.135052	-3.27308
ENST00000433878	ENSG00000163820	FYCO1	1.55981e-05	0.000563305	-2.26682	0.524719	5.66016	1.68624	0.511667	-0.257219	0.0389942	0.0389942	-3.27033
ENST00000252486	ENSG00000130203	APOE	3.2494e-07	1.70695e-05	-2.26515	0.443419	5.77887	1.80303	0.0211549	0.372085	0.0359315	0.372085	-3.26792
ENST00000486333	ENSG00000225932	CTAGE4	0.000396312	0.00951701	-2.25571	0.636752	3.38122	1.64127	0.241443	-0.0227026	0.569464	0.569464	-3.2543
ENST00000259407	ENSG00000136881	BAAT	6.08542e-10	5.23586e-08	-2.25559	0.364498	5.95063	1.68138	0.0313448	0.234372	0.0323483	0.234372	-3.25412
ENST00000394642	ENSG00000006042	TMEM98	7.56381e-61	2.04867e-57	-2.25157	0.136822	6.26517	1.48055	0.00544251	0.0319979	0.0276727	0.0319979	-3.24833
ENST00000494977	ENSG00000139132	FGD4	2.45306e-07	1.3214e-05	-2.24259	0.434505	4.81739	1.76056	0.038865	0.338724	0.0930916	0.338724	-3.23537
ENST00000483856	ENSG00000135596	MICAL1	0.000202896	0.00539407	-2.24127	0.603239	3.55372	1.46054	0.269161	-0.239627	0.458635	0.458635	-3.23346
ENST00000564609	ENSG00000069974	RAB27A	0.000847052	0.0181968	-2.22257	0.666048	4.23334	1.51842	0.691716	-0.566823	0.195525	0.195525	-3.20648
ENST00000324198	ENSG00000100077	GRK3	4.69277e-42	5.47865e-39	-2.22174	0.163502	5.678	1.43524	0.0149673	0.0141088	0.0384987	0.0384987	-3.20528
ENST00000456101	ENSG00000135596	MICAL1	7.54219e-16	1.40303e-13	-2.21895	0.275255	5.51413	1.43717	0.107937	-0.0724816	0.0435944	0.0435944	-3.20126
ENST00000261187	ENSG00000118596	SLC16A7	5.52263e-09	4.06409e-07	-2.21568	0.380008	4.06213	1.43774	0.0508643	-0.00991243	0.237948	0.237948	-3.19654
ENST00000318602	ENSG00000175899	A2M	1.03245e-13	1.57812e-11	-2.21057	0.297252	6.1617	1.54765	0.00437738	0.17234	0.0289944	0.17234	-3.18917
ENST00000369111	ENSG00000118298	CA14	4.13487e-07	2.12431e-05	-2.20241	0.435032	4.16158	1.71033	0.108812	0.269695	0.212683	0.269695	-3.17741
ENST00000569206	ENSG00000126856	PRDM7	5.67698e-06	0.000229085	-2.19064	0.482724	3.78229	1.43635	0.128613	-0.0525032	0.337432	0.337432	-3.16042
ENST00000373968	ENSG00000165471	MBL2	0.000301698	0.00756065	-2.18578	0.604835	3.36363	1.46423	0.150283	-0.0345516	0.581369	0.581369	-3.15341
ENST00000406072	ENSG00000048052	HDAC9	3.16197e-06	0.000135596	-2.16391	0.464357	5.51417	1.7075	0.25528	0.175974	0.0435933	0.175974	-3.12186
ENST00000358807	ENSG00000135596	MICAL1	8.17359e-09	5.86912e-07	-2.15468	0.373763	6.48695	1.38848	0.254033	-0.181691	0.0253638	0.0253638	-3.10855
ENST00000342435	ENSG00000188313	PLSCR1	5.10251e-21	1.52205e-18	-2.14541	0.228064	5.756	1.34593	0.0675459	-0.0315511	0.0364803	0.0364803	-3.09517
ENST00000286657	ENSG00000156140	ADAMTS3	2.75988e-11	3.02394e-09	-2.13486	0.320605	4.38796	1.34652	0.0436818	0.00805724	0.161893	0.161893	-3.07995
ENST00000621712	ENSG00000276559	BAAT	6.85484e-12	8.24443e-10	-2.12882	0.310295	5.41203	1.44398	0.145088	0.0289261	0.047478	0.047478	-3.07124
ENST00000341500	ENSG00000171105	INSR	1.1494e-06	5.35276e-05	-2.12521	0.436911	3.92307	1.35801	0.101181	-0.0223356	0.280601	0.280601	-3.06602
ENST00000377208	ENSG00000152192	POU4F1	5.24129e-07	2.64459e-05	-2.11299	0.421145	3.85594	1.33946	0.0487652	0.0256883	0.305961	0.305961	-3.0484
ENST00000259727	ENSG00000137198	GMPR	3.84158e-39	3.88246e-36	-2.10738	0.161013	6.02461	1.31332	0.00768622	0.0441641	0.0310583	0.0441641	-3.04031
ENST00000400758	ENSG00000188191	PRKAR1B	2.20456e-18	5.38907e-16	-2.10408	0.240567	5.19039	1.36411	0.0262843	0.089461	0.0590913	0.089461	-3.03554
ENST00000056217	ENSG00000050327	ARHGEF5	1.29931e-05	0.000478935	-2.06059	0.47259	4.66277	1.22479	0.332874	-0.319302	0.113807	0.113807	-2.97281
ENST00000401533	ENSG00000157833	GAREM2	1.19425e-09	9.81383e-08	-2.05864	0.338535	4.61098	1.28027	0.107475	-0.0264867	0.121737	0.121737	-2.96999
ENST00000433055	ENSG00000163923	RPL39L	1.66799e-09	1.33979e-07	-2.05589	0.341101	4.69143	1.35372	0.123062	0.0473869	0.109638	0.109638	-2.96602
ENST00000621840	ENSG00000083544	TDRD3	2.68752e-07	1.42954e-05	-2.0523	0.39896	5.77594	1.23692	0.282337	-0.243251	0.0360007	0.0360007	-2.96085
ENST00000217169	ENSG00000101197	BIRC7	1.82398e-07	1.00412e-05	-2.04694	0.392403	6.55928	1.4611	0.221233	0.086727	0.0247313	0.086727	-2.95311
ENST00000367196	ENSG00000117984	CTSD	4.52475e-27	2.18846e-24	-2.03839	0.18918	5.56863	1.2209	0.0298206	0.00956246	0.0417573	0.0417573	-2.94077
ENST00000377881	ENSG00000083544	TDRD3	0.00169551	0.0326511	-2.03307	0.647691	5.85819	1.24695	0.804842	-0.727868	0.0341651	0.0341651	-2.9331
ENST00000579849	ENSG00000006042	TMEM98	6.06695e-05	0.00187073	-2.02472	0.504893	3.99175	1.20315	0.251939	-0.214757	0.257895	0.257895	-2.92105
ENST00000534553	ENSG00000167995	BEST1	0.000582639	0.0132657	-2.00983	0.584326	3.88036	1.24806	0.386506	-0.276915	0.296369	0.296369	-2.89957
ENST00000524877	ENSG00000167995	BEST1	9.15301e-06	0.00035095	-2.00727	0.452469	4.36857	1.35856	0.243604	-0.00167027	0.165852	0.165852	-2.89588
ENST00000313401	ENSG00000176749	CDK5R1	2.19663e-17	4.82924e-15	-1.98994	0.234582	6.92817	1.22572	0.00243126	0.107626	0.0221953	0.107626	-2.87087
ENST00000524926	ENSG00000167995	BEST1	3.93965e-08	2.48154e-06	-1.98411	0.361171	5.35968	1.34838	0.0976497	0.163239	0.0497418	0.163239	-2.86246
ENST00000521416	ENSG00000043462	LCP2	3.80822e-07	1.97296e-05	-1.97679	0.389263	4.70096	1.13468	0.194765	-0.173547	0.108286	0.108286	-2.85191
ENST00000378083	ENSG00000069424	KCNAB2	1.00625e-06	4.76476e-05	-1.96284	0.401365	5.44378	1.121	0.275983	-0.252394	0.0462041	0.0462041	-2.83178
ENST00000372164	ENSG00000108219	TSPAN14	9.54849e-06	0.000364874	-1.9609	0.442926	6.77029	1.43492	0.00478944	0.387577	0.023138	0.387577	-2.82898
ENST00000319332	ENSG00000090530	P3H2	0.0010959	0.0226586	-1.95987	0.600326	4.03841	1.18988	0.476478	-0.368643	0.244305	0.244305	-2.82749
ENST00000342412	ENSG00000101197	BIRC7	7.16703e-06	0.000281824	-1.9519	0.43485	5.61067	1.28871	0.337748	-0.104216	0.0404407	0.0404407	-2.81599
ENST00000274605	ENSG00000145911	N4BP3	0.00100619	0.0211	-1.9481	0.592345	3.38796	1.10613	0.136819	-0.111359	0.564926	0.564926	-2.81051
ENST00000299267	ENSG00000166206	GABRB3	0.000414303	0.00990647	-1.94458	0.550746	4.80575	1.18982	0.51214	-0.384471	0.0945026	0.0945026	-2.80543
ENST00000334805	ENSG00000214530	STARD10	2.01375e-05	0.000707247	-1.94378	0.455926	5.38512	1.17458	0.367129	-0.256214	0.048609	0.048609	-2.80428
ENST00000252338	ENSG00000130054	FAM155B	0.00192021	0.0360875	-1.94101	0.625668	3.21729	1.17454	0.101432	0.0130175	0.681488	0.681488	-2.80029
ENST00000487389	ENSG00000188313	PLSCR1	5.79017e-10	5.00727e-08	-1.93517	0.312324	5.10923	1.23719	0.104211	0.0908825	0.0647954	0.0908825	-2.79186
ENST00000449131	ENSG00000167995	BEST1	1.63431e-11	1.83827e-09	-1.93213	0.286861	6.32931	1.20768	0.0143002	0.150278	0.0269388	0.150278	-2.78748
ENST00000359271	ENSG00000197496	SLC2A10	3.2041e-06	0.000137142	-1.93044	0.414498	3.92087	1.22658	0.0622353	0.126582	0.281382	0.281382	-2.78503
ENST00000422725	ENSG00000228594	FNDC10	5.48923e-05	0.0017147	-1.91148	0.473872	3.97017	1.21248	0.184427	0.0122094	0.264681	0.264681	-2.75768
ENST00000474889	ENSG00000144724	PTPRG	3.41707e-29	1.91223e-26	-1.91117	0.170403	6.2495	1.09337	0.00967775	0.0483964	0.0278614	0.0483964	-2.75724
ENST00000569493	ENSG00000069974	RAB27A	2.0581e-48	3.39903e-45	-1.90926	0.130582	6.46868	1.06266	0.00857138	0.0161058	0.0255318	0.0255318	-2.75447
ENST00000466332	ENSG00000188120	DAZ1	1.45729e-09	1.18177e-07	-1.89878	0.313899	4.63708	1.08123	0.0793891	-0.0197527	0.117677	0.117677	-2.73936
ENST00000420687	ENSG00000134508	CABLES1	1.69087e-45	2.38529e-42	-1.8899	0.133496	6.54377	1.03962	0.0107796	0.0115343	0.0248628	0.0248628	-2.72655
ENST00000463834	ENSG00000204128	C2orf72	4.5657e-05	0.00145532	-1.88892	0.463331	4.16879	1.12572	0.218435	-0.0944336	0.210917	0.210917	-2.72513
ENST00000339364	ENSG00000155629	PIK3AP1	0.000156413	0.00430011	-1.88475	0.498525	3.70941	1.06366	0.12474	-0.0678952	0.372314	0.372314	-2.71912
ENST00000507288	ENSG00000145555	MYO10	0.00146004	0.0287981	-1.87957	0.590592	3.52694	1.08993	0.222652	-0.128651	0.474946	0.474946	-2.71164
ENST00000579584	ENSG00000176658	MYO1D	7.0616e-07	3.45243e-05	-1.86843	0.376726	5.23979	1.19752	0.227822	0.00560933	0.0560222	0.0560222	-2.69557
ENST00000329099	ENSG00000183688	RFLNB	8.93011e-21	2.6064e-18	-1.86838	0.199869	6.28488	1.06587	0.00483905	0.0750565	0.0274407	0.0750565	-2.69551
ENST00000372086	ENSG00000070759	TESK2	0.000479025	0.0112353	-1.86186	0.533147	5.18124	1.13389	0.508798	-0.341442	0.0596927	0.0596927	-2.6861
ENST00000590402	ENSG00000070540	WIPI1	0.00019623	0.00524568	-1.85634	0.498505	4.03435	1.12499	0.251586	-0.0877652	0.245429	0.245429	-2.67814
ENST00000562009	ENSG00000260266	PPIAP46	3.61965e-21	1.09419e-18	-1.85631	0.196579	5.09455	0.992624	0.0113668	-0.00193415	0.0659196	0.0659196	-2.67809
ENST00000377399	ENSG00000171621	SPSB1	0.00020519	0.00544012	-1.85127	0.498654	4.7069	1.19287	0.389859	-0.14058	0.107452	0.107452	-2.67082
ENST00000329399	ENSG00000107438	PDLIM1	2.53466e-16	5.00376e-14	-1.82513	0.22275	5.43328	1.0368	0.0149995	0.0842358	0.0466183	0.0842358	-2.63311
ENST00000510784	ENSG00000111913	RIPOR2	3.40241e-07	1.78043e-05	-1.8168	0.356258	4.20492	1.06635	0.051633	0.0921819	0.202207	0.202207	-2.62109
ENST00000497973	ENSG00000117448	AKR1A1	0.00125734	0.0254753	-1.7988	0.557675	4.57277	1.09519	0.494083	-0.294931	0.127919	0.127919	-2.59512
ENST00000334049	ENSG00000141404	GNAL	1.20357e-21	3.79058e-19	-1.7967	0.187984	5.22681	0.944489	0.0138754	0.011986	0.0568003	0.0568003	-2.59209
ENST00000483725	ENSG00000189367	KIAA0408	1.06517e-07	6.10608e-06	-1.7917	0.337088	4.46659	1.02529	0.0806515	0.0454543	0.146605	0.146605	-2.58488
ENST00000222286	ENSG00000105679	GAPDHS	2.08292e-22	6.9822e-20	-1.78252	0.183054	5.44237	0.965267	0.0119326	0.0550852	0.0462594	0.0550852	-2.57163
ENST00000262209	ENSG00000104321	TRPA1	5.7874e-25	2.43405e-22	-1.78121	0.172616	5.96409	0.957564	0.0114418	0.0481505	0.0321033	0.0481505	-2.56974
ENST00000497291	ENSG00000169282	KCNAB1	1.73078e-08	1.1678e-06	-1.779	0.315596	4.66294	1.07499	0.0599526	0.139249	0.113782	0.139249	-2.56656
ENST00000513421	ENSG00000072201	LNX1	3.541e-05	0.00116564	-1.75715	0.424887	4.71576	1.19164	0.0651239	0.295935	0.106219	0.295935	-2.53502
ENST00000389826	ENSG00000163412	EIF4E3	4.45973e-08	2.77302e-06	-1.75362	0.320495	4.91558	0.94362	0.123338	-0.0475122	0.0820958	0.0820958	-2.52994
ENST00000519505	ENSG00000104413	ESRP1	4.68949e-06	0.000193233	-1.7533	0.382966	4.73791	0.960532	0.190127	-0.0941991	0.1032	0.1032	-2.52948
ENST00000368801	ENSG00000197915	HRNR	0.000677252	0.0150653	-1.75094	0.51519	3.75854	0.986572	0.182449	-0.0533767	0.348393	0.348393	-2.52607
ENST00000295612	ENSG00000163412	EIF4E3	1.38673e-13	2.08666e-11	-1.74569	0.23598	4.93332	0.937199	0.031096	0.0464951	0.0802774	0.0802774	-2.51849
ENST00000558480	ENSG00000058335	RASGRF1	6.09533e-07	3.03704e-05	-1.74284	0.349395	4.31168	0.932578	0.066253	0.00925789	0.1779	0.1779	-2.51438
ENST00000453654	ENSG00000157680	DGKI	3.25202e-10	2.94785e-08	-1.73691	0.276302	4.68481	0.992831	0.0225936	0.130092	0.110588	0.130092	-2.50583
ENST00000264071	ENSG00000104833	TUBB4A	6.82723e-05	0.00206657	-1.73438	0.43553	6.12841	1.18462	0.0564303	0.322942	0.0294603	0.322942	-2.50218
ENST00000475012	ENSG00000144724	PTPRG	0.000809505	0.0174901	-1.72464	0.514892	4.52579	0.936903	0.394318	-0.292731	0.135911	0.135911	-2.48813
ENST00000290552	ENSG00000159387	IRX6	2.61409e-09	2.00689e-07	-1.72085	0.289016	4.50009	0.864821	0.0265934	-0.00474054	0.140467	0.140467	-2.48266
ENST00000526355	ENSG00000152402	GUCY1A2	1.04265e-10	1.03521e-08	-1.71543	0.26552	4.62832	0.905319	0.0219762	0.0533339	0.119025	0.119025	-2.47484
ENST00000238738	ENSG00000119729	RHOQ	4.39315e-16	8.42701e-14	-1.70949	0.210342	8.82722	0.91081	0.000362384	0.0881254	0.0255355	0.0881254	-2.46628
ENST00000358577	ENSG00000135596	MICAL1	4.32997e-10	3.83261e-08	-1.70791	0.273632	6.19762	0.920726	0.121234	-0.0193732	0.0285147	0.0285147	-2.46399
ENST00000389286	ENSG00000166450	PRTG	2.43171e-40	2.61363e-37	-1.6968	0.127614	6.1759	0.835439	0.00376861	0.0112062	0.028802	0.028802	-2.44796
ENST00000510738	ENSG00000052126	PLEKHA5	1.68869e-08	1.14346e-06	-1.69095	0.299751	4.57184	0.967312	0.0516289	0.123793	0.128072	0.128072	-2.43953
ENST00000272117	ENSG00000143772	ITPKB	0.000832732	0.0179233	-1.69084	0.505985	7.02747	0.949574	0.490335	-0.33548	0.0217069	0.0217069	-2.43937
ENST00000399639	ENSG00000143469	SYT14	7.91701e-12	9.35575e-10	-1.68416	0.246221	4.74215	0.865105	0.0186169	0.0452067	0.102632	0.102632	-2.42973
ENST00000046794	ENSG00000043462	LCP2	2.87834e-06	0.00012422	-1.67812	0.358625	4.63567	0.844466	0.139331	-0.0928169	0.117894	0.117894	-2.42102
ENST00000487289	ENSG00000004455	AK2	1.32136e-12	1.76128e-10	-1.67385	0.236018	4.99896	0.896004	0.0349033	0.0765059	0.0739704	0.0765059	-2.41486
ENST00000549336	ENSG00000111424	VDR	5.52779e-09	4.06409e-07	-1.66879	0.286219	6.87837	0.936109	0.106148	0.0576947	0.0224701	0.0576947	-2.40755
ENST00000471320	ENSG00000151657	KIN	6.02065e-06	0.000241938	-1.66799	0.368562	4.70805	1.02777	0.100673	0.171002	0.107291	0.171002	-2.40639
ENST00000471710	ENSG00000083544	TDRD3	7.24536e-11	7.3554e-09	-1.64785	0.252912	4.70403	0.825941	0.020075	0.0383911	0.107854	0.107854	-2.37734
ENST00000261693	ENSG00000073060	SCARB1	1.65584e-09	1.33161e-07	-1.64472	0.272828	7.42239	0.900488	0.00272111	0.146149	0.0204996	0.146149	-2.37282
ENST00000343348	ENSG00000092421	SEMA6A	8.22397e-11	8.28675e-09	-1.63802	0.252141	7.16904	0.875589	0.00369396	0.123456	0.0211427	0.123456	-2.36316
ENST00000503191	ENSG00000104723	TUSC3	0.000182	0.00489817	-1.63242	0.436153	4.12308	0.903048	0.158193	0.00709689	0.222266	0.222266	-2.35508
ENST00000340607	ENSG00000148344	PTGES	4.47946e-11	4.68083e-09	-1.62689	0.246974	4.83188	0.760701	0.0306247	-0.0253958	0.0913676	0.0913676	-2.3471
ENST00000532090	ENSG00000254470	AP5B1	2.61734e-17	5.64419e-15	-1.62397	0.191903	5.16727	0.782123	0.0130231	0.0203556	0.0606303	0.0606303	-2.3429
ENST00000537121	NA	NA	1.07909e-11	1.2469e-09	-1.60454	0.236117	5.56643	0.831161	0.0116104	0.099892	0.0418288	0.099892	-2.31486
ENST00000338483	ENSG00000185022	MAFF	0.000292874	0.00735585	-1.60041	0.441916	6.32557	0.859406	0.3636	-0.214729	0.0269799	0.0269799	-2.3089
ENST00000332995	ENSG00000112137	PHACTR1	1.2882e-15	2.34483e-13	-1.59194	0.199099	5.95262	0.792032	0.00456222	0.0747185	0.0323117	0.0747185	-2.29668
ENST00000354675	ENSG00000131016	AKAP12	0.00203362	0.0377993	-1.58887	0.514984	7.19958	0.755294	0.509376	-0.4697	0.0210406	0.0210406	-2.29225
ENST00000450735	ENSG00000103942	HOMER2	4.21994e-05	0.00135681	-1.5879	0.387755	4.57001	0.809718	0.172333	-0.0681332	0.128376	0.128376	-2.29085
ENST00000372158	ENSG00000108219	TSPAN14	1.02087e-08	7.22322e-07	-1.58672	0.277048	5.37496	0.850915	0.0167365	0.136775	0.0490535	0.136775	-2.28915
ENST00000513137	ENSG00000092421	SEMA6A	5.63316e-12	6.88517e-10	-1.58557	0.230173	4.88421	0.794686	0.0205228	0.0685964	0.085436	0.085436	-2.2875
ENST00000282272	ENSG00000065413	ANKRD44	2.19352e-11	2.43093e-09	-1.57411	0.235205	7.26078	0.802789	0.00164426	0.108998	0.0208566	0.108998	-2.27096
ENST00000394745	ENSG00000058335	RASGRF1	4.09328e-08	2.56163e-06	-1.57057	0.286247	4.64623	0.731962	0.0475889	-0.0158649	0.116285	0.116285	-2.26585
ENST00000328528	ENSG00000187098	MITF	1.33545e-07	7.50732e-06	-1.56547	0.296833	8.43131	0.851243	0.00409193	0.172127	0.0224683	0.172127	-2.25849
ENST00000454170	ENSG00000104413	ESRP1	0.000255222	0.00654724	-1.55822	0.426095	4.01824	0.85095	0.113114	0.0703166	0.250001	0.250001	-2.24803
ENST00000256925	ENSG00000134508	CABLES1	1.046e-11	1.21073e-09	-1.54709	0.227512	6.55916	0.772586	0.00577426	0.0977492	0.0247323	0.0977492	-2.23197
ENST00000410113	ENSG00000115363	EVA1A	9.56132e-12	1.11051e-09	-1.52717	0.224157	5.98839	0.727672	0.0688196	0.00271534	0.0316728	0.0316728	-2.20324
ENST00000471651	ENSG00000117448	AKR1A1	2.93149e-05	0.000989038	-1.51795	0.363258	4.32526	0.742289	0.088947	0.00899498	0.174966	0.174966	-2.18994
ENST00000576422	ENSG00000262826	INTS3	2.25708e-24	8.99023e-22	-1.51662	0.148873	6.40242	0.69518	0.0080418	0.0362843	0.0261713	0.0362843	-2.18803
ENST00000512605	ENSG00000143624	INTS3	2.25708e-24	8.99023e-22	-1.51662	0.148873	6.40242	0.69518	0.0080418	0.0362843	0.0261713	0.0362843	-2.18803
ENST00000617581	ENSG00000164651	SP8	7.16922e-05	0.00216043	-1.50918	0.38009	4.04497	0.761177	0.0464259	0.0824014	0.242511	0.242511	-2.17729
ENST00000392039	ENSG00000135898	GPR55	4.46945e-07	2.2772e-05	-1.50899	0.29894	4.54325	0.657456	0.0458415	-0.0378256	0.132889	0.132889	-2.17701
ENST00000373313	ENSG00000204103	MAFB	0.000210522	0.00555755	-1.50112	0.405045	3.92864	0.894582	0.0494872	0.243076	0.278636	0.278636	-2.16565
ENST00000328089	ENSG00000171621	SPSB1	1.34892e-18	3.33356e-16	-1.48898	0.169172	7.00859	0.682508	0.0023061	0.0549321	0.0217938	0.0549321	-2.14814
ENST00000377474	ENSG00000178695	KCTD12	3.94694e-10	3.52585e-08	-1.48542	0.237435	4.77231	0.660204	0.0140623	0.0206867	0.0986882	0.0986882	-2.143
ENST00000367495	ENSG00000118508	RAB32	4.59604e-13	6.4701e-11	-1.48381	0.205038	7.43451	0.701124	0.00120014	0.0828813	0.0204802	0.0828813	-2.14068
ENST00000593411	ENSG00000099331	MYO9B	7.38113e-06	0.000289403	-1.47611	0.329313	4.30527	0.661771	0.0375963	0.00817141	0.179297	0.179297	-2.12957
ENST00000429204	ENSG00000143772	ITPKB	3.49838e-11	3.73637e-09	-1.47484	0.222655	7.04864	0.70646	0.0463744	0.0527757	0.0216129	0.0527757	-2.12775
ENST00000397860	ENSG00000197971	MBP	3.55004e-07	1.85336e-05	-1.47282	0.289263	7.26344	0.678496	0.146497	-0.0779821	0.0208492	0.0208492	-2.12483
ENST00000311320	ENSG00000174791	RIN1	3.64405e-06	0.000154122	-1.46951	0.317339	5.66695	0.683688	0.162605	-0.0847876	0.038804	0.038804	-2.12005
ENST00000505560	ENSG00000039319	ZFYVE16	2.93436e-06	0.000126396	-1.46767	0.313915	7.24922	0.784372	0.0613682	0.135717	0.0208893	0.135717	-2.11739
ENST00000371384	ENSG00000124098	FAM210B	5.17374e-10	4.50295e-08	-1.46756	0.236181	7.91544	0.710981	0.000660865	0.110902	0.0205342	0.110902	-2.11725
ENST00000462676	ENSG00000069424	KCNAB2	2.10831e-06	9.34904e-05	-1.46672	0.309255	4.40687	0.680445	0.033174	0.0435904	0.158103	0.158103	-2.11603
ENST00000494390	ENSG00000157680	DGKI	2.91233e-06	0.000125527	-1.46477	0.313192	4.61229	0.781166	0.0278324	0.168346	0.12153	0.168346	-2.11321
ENST00000338415	ENSG00000115828	QPCT	6.5751e-16	1.22989e-13	-1.46164	0.180937	7.71248	0.666516	0.000971999	0.0645042	0.0203156	0.0645042	-2.10869
ENST00000536974	ENSG00000052126	PLEKHA5	0.000815612	0.0176052	-1.46113	0.436493	4.13498	0.784849	0.161776	0.0422421	0.219276	0.219276	-2.10797
ENST00000469668	ENSG00000178104	PDE4DIP	0.000406549	0.00973431	-1.45965	0.412821	3.87645	0.633258	0.0429676	-0.0143614	0.297875	0.297875	-2.10583
ENST00000314557	ENSG00000187098	MITF	1.4981e-05	0.000543336	-1.45103	0.33519	5.83704	0.794168	0.0340144	0.19069	0.0346162	0.19069	-2.09339
ENST00000616406	ENSG00000108219	TSPAN14	5.50524e-06	0.000223086	-1.45092	0.319267	6.16172	0.776219	0.0107371	0.193125	0.0289941	0.193125	-2.09324
ENST00000287461	ENSG00000156853	ZNF689	5.72046e-27	2.70874e-24	-1.44335	0.134224	7.29638	0.626101	0.00146686	0.0345655	0.020762	0.0345655	-2.08231
ENST00000523347	ENSG00000104413	ESRP1	6.48145e-07	3.20583e-05	-1.44048	0.289469	6.46721	0.736496	0.00436432	0.16322	0.0255454	0.16322	-2.07817
ENST00000382788	ENSG00000159788	RGS12	9.79152e-10	8.1313e-08	-1.43688	0.235062	6.31584	0.684613	0.00564881	0.104859	0.027088	0.104859	-2.07298
ENST00000538291	ENSG00000073060	SCARB1	1.35373e-08	9.34155e-07	-1.43648	0.25294	4.75677	0.625139	0.027257	0.014247	0.1007	0.1007	-2.0724
ENST00000465904	ENSG00000135596	MICAL1	2.22544e-07	1.21037e-05	-1.43348	0.276762	4.60655	0.648406	0.0307559	0.0407675	0.122439	0.122439	-2.06807
ENST00000400228	ENSG00000088387	DOCK9	2.39931e-17	5.22395e-15	-1.42984	0.168759	5.74962	0.610436	0.0203229	0.0103762	0.0366366	0.0366366	-2.06281
ENST00000622179	ENSG00000198053	SIRPA	1.24199e-09	1.01815e-07	-1.42707	0.234919	5.38931	0.676468	0.0569293	0.0534441	0.0484292	0.0534441	-2.05882
ENST00000359741	ENSG00000104635	SLC39A14	0.000757976	0.0165191	-1.42461	0.423022	6.67879	0.698654	0.334113	-0.195524	0.0237833	0.0237833	-2.05528
ENST00000337318	ENSG00000189319	FAM53B	8.53626e-34	6.28278e-31	-1.41897	0.117101	6.6601	0.592394	0.00350104	0.0164662	0.0239244	0.0239244	-2.04714
ENST00000296657	ENSG00000164236	ANKRD33B	2.2595e-08	1.47967e-06	-1.41255	0.252654	4.67941	0.596985	0.0163	0.0150817	0.111368	0.111368	-2.03788
ENST00000291592	ENSG00000160233	LRRC3	1.79997e-05	0.000639128	-1.40695	0.328085	4.29103	0.60426	0.0328493	0.0122871	0.18243	0.18243	-2.02979
ENST00000367211	ENSG00000215817	ZC3H11B	9.45906e-06	0.000361865	-1.40159	0.316443	4.71606	0.60307	0.0940953	-0.0453281	0.106178	0.106178	-2.02206
ENST00000519845	ENSG00000164953	TMEM67	3.98683e-05	0.00129044	-1.40037	0.340869	5.00538	0.68988	0.158994	-0.00781399	0.0733892	0.0733892	-2.02031
ENST00000418664	ENSG00000096696	DSP	0.00121319	0.0247361	-1.39933	0.432457	5.24327	0.626445	0.318221	-0.240075	0.055817	0.055817	-2.0188
ENST00000358397	ENSG00000104413	ESRP1	4.07177e-05	0.00131542	-1.39881	0.340893	4.71268	0.758262	0.0652314	0.167185	0.106646	0.167185	-2.01805
ENST00000334181	ENSG00000186230	ZNF749	1.00409e-20	2.91802e-18	-1.39508	0.149436	5.691	0.577105	0.00651681	0.0180233	0.0381456	0.0381456	-2.01267
ENST00000301776	ENSG00000162174	ASRGL1	9.35032e-06	0.000357907	-1.39429	0.31462	6.18676	0.725134	0.0196198	0.178352	0.0286574	0.178352	-2.01154
ENST00000395863	ENSG00000101144	BMP7	1.66771e-17	3.70248e-15	-1.39124	0.163389	6.03525	0.598776	0.00716236	0.0462296	0.0308837	0.0462296	-2.00713
ENST00000370058	ENSG00000198910	L1CAM	4.74405e-09	3.51459e-07	-1.38927	0.237242	4.96328	0.626129	0.0352505	0.051878	0.0773171	0.0773171	-2.00429
ENST00000392040	ENSG00000135898	GPR55	8.05551e-21	2.36131e-18	-1.3827	0.147741	6.05645	0.557508	0.0131117	2.98304e-05	0.0305432	0.0305432	-1.99481
ENST00000262345	ENSG00000081985	IL12RB2	0.000204842	0.005433	-1.37375	0.369987	5.9129	0.671797	0.24072	-0.08602	0.0330608	0.0330608	-1.9819
ENST00000400068	ENSG00000198053	SIRPA	1.9122e-08	1.28199e-06	-1.37052	0.243875	5.76864	0.631227	0.0827756	0.0275465	0.0361747	0.0361747	-1.97724
ENST00000258052	ENSG00000135587	SMPD2	1.17739e-17	2.67532e-15	-1.36708	0.159797	5.55646	0.577363	0.00891554	0.0417054	0.0421544	0.0421544	-1.97228
ENST00000328557	ENSG00000174004	NRROS	1.36338e-09	1.1096e-07	-1.36286	0.224903	5.90459	0.617391	0.00598354	0.0951795	0.0332228	0.0951795	-1.96619
ENST00000284881	ENSG00000154642	C21orf91	9.475e-17	1.95009e-14	-1.34783	0.16217	6.68387	0.564124	0.00241839	0.05018	0.0237454	0.05018	-1.9445
ENST00000338492	ENSG00000151640	DPYSL4	1.69961e-08	1.14971e-06	-1.34709	0.238842	4.81169	0.520949	0.0203115	-0.0174207	0.0937792	0.0937792	-1.94344
ENST00000448504	ENSG00000141337	ARSG	1.88364e-13	2.77276e-11	-1.34523	0.182855	5.25836	0.556906	0.0119284	0.03458	0.0549438	0.0549438	-1.94076
ENST00000566673	ENSG00000156853	ZNF689	2.12808e-10	1.99031e-08	-1.34356	0.211525	6.00931	0.592461	0.00532889	0.0841564	0.031314	0.0841564	-1.93835
ENST00000263734	ENSG00000116016	EPAS1	2.44467e-07	1.32007e-05	-1.33815	0.259236	5.75888	0.555603	0.0979968	-0.0466753	0.0364103	0.0364103	-1.93054
ENST00000422240	ENSG00000143801	PSEN2	0.000742833	0.0162518	-1.33532	0.395853	5.26894	0.587012	0.259053	-0.168562	0.0543466	0.0543466	-1.92645
ENST00000394836	ENSG00000167994	RAB3IL1	1.31016e-07	7.38059e-06	-1.33117	0.252239	5.31198	0.61536	0.0433186	0.0839302	0.0520502	0.0839302	-1.92047
ENST00000572862	ENSG00000167291	TBC1D16	3.41173e-11	3.66115e-09	-1.32446	0.199839	6.40925	0.569657	0.0130081	0.0668635	0.0261031	0.0668635	-1.91079
ENST00000368485	ENSG00000160712	IL6R	7.02062e-10	6.00995e-08	-1.32396	0.214732	6.36829	0.579863	0.00399195	0.0882277	0.026521	0.0882277	-1.91006
ENST00000396307	ENSG00000069974	RAB27A	5.57367e-05	0.00173522	-1.31125	0.325359	7.03321	0.672725	0.00643259	0.205285	0.0216811	0.205285	-1.89174
ENST00000550776	ENSG00000135404	CD63	3.26345e-26	1.42567e-23	-1.30955	0.123642	7.32968	0.516188	0.00443399	0.0261408	0.0206818	0.0261408	-1.88929
ENST00000263268	ENSG00000118242	MREG	5.69501e-15	9.81237e-13	-1.30732	0.16738	5.99818	0.515617	0.0245283	0.00732633	0.0315036	0.0315036	-1.88607
ENST00000297029	ENSG00000006747	SCIN	0.000255361	0.00654724	-1.30704	0.357425	4.14467	0.535049	0.0386447	0.0161293	0.21686	0.21686	-1.88566
ENST00000424846	ENSG00000241015	TPM3P9	1.20203e-17	2.72217e-15	-1.30439	0.152512	5.68224	0.495559	0.00813681	0.00286921	0.0383828	0.0383828	-1.88184
ENST00000261622	ENSG00000103257	SLC7A5	4.03994e-10	3.5947e-08	-1.29959	0.207853	8.3547	0.556617	0.00310348	0.0833019	0.0220459	0.0833019	-1.87492
ENST00000366784	ENSG00000143772	ITPKB	3.66868e-11	3.90594e-09	-1.29638	0.19592	5.18197	0.53232	0.0171252	0.0437142	0.0596444	0.0596444	-1.87028
ENST00000366779	ENSG00000163050	COQ8A	2.565e-06	0.000111982	-1.29638	0.275655	4.6827	0.53843	0.0410788	0.0268922	0.110893	0.110893	-1.87028
ENST00000519921	ENSG00000158669	GPAT4	0.000744488	0.0162723	-1.29481	0.383916	4.9122	0.519517	0.212335	-0.16508	0.082448	0.082448	-1.86802
ENST00000264433	ENSG00000052795	FNIP2	2.84769e-20	8.13612e-18	-1.28932	0.139771	7.15074	0.50845	0.00126279	0.0378091	0.0212071	0.0378091	-1.8601
ENST00000356025	ENSG00000198053	SIRPA	4.75344e-13	6.66397e-11	-1.28821	0.178122	7.85845	0.52853	0.00578518	0.05767	0.0204436	0.05767	-1.8585
ENST00000374279	ENSG00000148154	UGCG	2.91338e-24	1.14694e-21	-1.27494	0.125454	7.0772	0.491398	0.00141723	0.0300603	0.0214914	0.0300603	-1.83934
ENST00000393913	ENSG00000115363	EVA1A	3.17466e-05	0.00105895	-1.272	0.305727	5.95561	0.622511	0.0274153	0.159523	0.0322572	0.159523	-1.8351
ENST00000429989	ENSG00000108219	TSPAN14	7.32077e-07	3.55859e-05	-1.27138	0.256706	4.71665	0.536255	0.0256997	0.061132	0.106096	0.106096	-1.83421
ENST00000490337	ENSG00000169282	KCNAB1	2.88705e-05	0.000975503	-1.27095	0.303896	5.23038	0.569588	0.128121	-0.00204315	0.0565844	0.0565844	-1.8336
ENST00000608933	ENSG00000163644	PPM1K	4.97672e-06	0.000203741	-1.27065	0.2783	6.28858	0.594075	0.00529385	0.149608	0.0273977	0.149608	-1.83316
ENST00000509337	ENSG00000153071	DAB2	1.33709e-05	0.000490989	-1.26911	0.291485	5.26979	0.605833	0.0715131	0.0984134	0.0542993	0.0984134	-1.83093
ENST00000479689	ENSG00000106266	SNX8	6.50334e-07	3.21431e-05	-1.26862	0.254966	5.13553	0.508908	0.0671614	-0.00989962	0.062854	0.062854	-1.83023
ENST00000498088	ENSG00000172458	IL17D	1.00017e-06	4.7426e-05	-1.26609	0.258829	5.12604	0.572839	0.0121565	0.121828	0.0635443	0.121828	-1.82658
ENST00000351578	ENSG00000082074	FYB1	0.000162984	0.00445186	-1.26081	0.334398	4.2842	0.618556	0.0396957	0.152069	0.183948	0.183948	-1.81897
ENST00000372271	ENSG00000126882	FAM78A	1.38189e-09	1.12332e-07	-1.25923	0.207876	5.83258	0.527121	0.00723214	0.0791929	0.0347131	0.0791929	-1.81668
ENST00000565644	ENSG00000103257	SLC7A5	1.3214e-13	1.99278e-11	-1.25386	0.169348	7.9599	0.498351	0.00554101	0.0518168	0.0206211	0.0518168	-1.80893
ENST00000358984	ENSG00000180777	ANKRD30B	1.10721e-11	1.27504e-09	-1.25282	0.184459	5.52284	0.493065	0.0247598	0.0273002	0.0432906	0.0432906	-1.80743
ENST00000296589	ENSG00000164175	SLC45A2	6.81108e-08	4.07779e-06	-1.24617	0.230939	7.12441	0.535122	0.0108277	0.095838	0.0213042	0.095838	-1.79784
ENST00000377893	ENSG00000158292	GPR153	1.56101e-10	1.49718e-08	-1.24166	0.19403	7.58498	0.505028	0.00111432	0.0741812	0.0203248	0.0741812	-1.79133
ENST00000241125	ENSG00000121743	GJA3	2.22704e-11	2.46251e-09	-1.23712	0.184912	5.21504	0.495113	0.0108619	0.0566168	0.057523	0.057523	-1.78478
ENST00000445155	ENSG00000148834	GSTO1	0.000148889	0.00410994	-1.2369	0.326108	5.68984	0.469563	0.174516	-0.136668	0.0381768	0.0381768	-1.78447
ENST00000524872	ENSG00000178538	CA8	1.72049e-07	9.54131e-06	-1.23337	0.235951	5.80486	0.53007	0.0164317	0.0949137	0.0353299	0.0949137	-1.77938
ENST00000513610	ENSG00000145555	MYO10	7.79824e-18	1.80836e-15	-1.22739	0.142678	8.35675	0.465322	0.000700702	0.0400132	0.0220565	0.0400132	-1.77075
ENST00000340857	ENSG00000189060	H1F0	6.98628e-23	2.43846e-20	-1.22655	0.124547	7.58904	0.456427	0.00111387	0.0299101	0.0203228	0.0299101	-1.76954
ENST00000470308	ENSG00000123200	ZC3H13	0.00067104	0.0149605	-1.22601	0.360469	4.18022	0.509536	0.051741	0.0416853	0.208135	0.208135	-1.76875
ENST00000557457	ENSG00000185567	AHNAK2	0.000295492	0.00741885	-1.22455	0.338347	4.22718	0.5092	0.031997	0.0622257	0.196961	0.196961	-1.76666
ENST00000356436	ENSG00000145979	TBC1D7	3.96523e-08	2.49533e-06	-1.22348	0.222759	6.81413	0.512752	0.00424747	0.0949955	0.022855	0.0949955	-1.76511
ENST00000259939	ENSG00000137393	RNF144B	1.2499e-11	1.42964e-09	-1.22187	0.180368	5.58378	0.482332	0.00535737	0.0597077	0.0412731	0.0597077	-1.76278
ENST00000381669	ENSG00000128298	BAIAP2L2	0.000428876	0.0102291	-1.21731	0.345665	5.18935	0.486077	0.179809	-0.106665	0.059159	0.059159	-1.7562
ENST00000020945	ENSG00000019549	SNAI2	1.64232e-06	7.45353e-05	-1.21704	0.253915	8.05637	0.533719	0.00152432	0.127421	0.0208591	0.127421	-1.75581
ENST00000382102	ENSG00000164175	SLC45A2	2.01873e-09	1.58762e-07	-1.21393	0.202447	7.24497	0.491295	0.0284265	0.0535427	0.0209015	0.0535427	-1.75133
ENST00000494552	ENSG00000128596	CCDC136	3.19792e-05	0.00106461	-1.21167	0.291343	4.96368	0.499863	0.0924834	0.00131198	0.0772784	0.0772784	-1.74806
ENST00000561387	ENSG00000246922	UBAP1L	1.02558e-05	0.000388395	-1.20319	0.272727	4.77844	0.54113	0.0157539	0.133006	0.0979056	0.133006	-1.73584
ENST00000394351	ENSG00000187098	MITF	2.0795e-18	5.10177e-16	-1.20277	0.137413	6.38751	0.444101	0.0114427	0.0244604	0.0263223	0.0263223	-1.73522
ENST00000554619	ENSG00000123374	CDK2	0.000206814	0.00548102	-1.19536	0.322153	4.80759	0.512164	0.113287	0.00794009	0.0942783	0.0942783	-1.72454
ENST00000369214	ENSG00000112238	PRDM13	0.000113591	0.00322769	-1.19383	0.309318	4.36613	0.435817	0.0250004	0.00837452	0.166355	0.166355	-1.72233
ENST00000355295	ENSG00000196116	TDRD7	7.89713e-10	6.70098e-08	-1.18293	0.192441	7.46855	0.463292	0.000902969	0.0731638	0.0204314	0.0731638	-1.7066
ENST00000361487	ENSG00000198807	PAX9	5.84583e-13	8.12811e-11	-1.18005	0.163804	5.77416	0.44386	0.0150689	0.0385947	0.0360429	0.0385947	-1.70245
ENST00000554545	ENSG00000123374	CDK2	3.94547e-11	4.16786e-09	-1.17772	0.178278	5.59137	0.437427	0.0225311	0.0254563	0.0410349	0.0410349	-1.69909
ENST00000288943	ENSG00000158050	DUSP2	2.87539e-07	1.52229e-05	-1.17726	0.229421	4.88752	0.466388	0.0201915	0.0619479	0.0850764	0.0850764	-1.69842
ENST00000236671	ENSG00000117984	CTSD	4.72352e-09	3.50322e-07	-1.16452	0.198838	10.5024	0.455235	9.03667e-05	0.0789825	0.0689659	0.0789825	-1.68004
ENST00000393359	ENSG00000135966	TGFBRAP1	0.00114871	0.0236063	-1.16384	0.357958	6.12852	0.475367	0.22681	-0.123721	0.0294587	0.0294587	-1.67906
ENST00000415432	ENSG00000134215	VAV3	4.52073e-10	3.98584e-08	-1.16248	0.186447	5.55306	0.427253	0.0272579	0.0207534	0.0422669	0.0422669	-1.6771
ENST00000513468	ENSG00000234602	MCIDAS	7.05372e-06	0.000278014	-1.15856	0.257913	4.70932	0.401955	0.0259248	-0.00439748	0.107113	0.107113	-1.67145
ENST00000586263	ENSG00000049759	NEDD4L	0.000126454	0.00355443	-1.1567	0.301754	6.69006	0.538371	0.109887	0.0722248	0.0236997	0.0722248	-1.66877
ENST00000345080	ENSG00000187772	LIN28B	0.00127635	0.0257986	-1.15332	0.358034	4.09224	0.448038	0.0262505	0.0530812	0.230126	0.230126	-1.66388
ENST00000523906	ENSG00000158669	GPAT4	2.24454e-07	1.2188e-05	-1.148	0.221714	5.08243	0.456684	0.0314451	0.0620481	0.0668694	0.0668694	-1.65622
ENST00000428572	ENSG00000128298	BAIAP2L2	0.000158387	0.00434381	-1.14618	0.303421	4.83954	0.471654	0.0936576	0.0186929	0.0904711	0.0904711	-1.65359
ENST00000308647	ENSG00000160072	ATAD3B	2.86154e-11	3.12522e-09	-1.14405	0.171946	7.61289	0.424638	0.00137123	0.0577595	0.0203132	0.0577595	-1.65051
ENST00000476623	ENSG00000156928	MALSU1	0.000902889	0.0192316	-1.14103	0.34377	4.39983	0.42705	0.0768503	-0.0126072	0.159506	0.159506	-1.64615
ENST00000340833	ENSG00000101224	CDC25B	0.000267257	0.00682124	-1.14091	0.312995	5.16568	0.435538	0.135193	-0.0609563	0.0607387	0.0607387	-1.64598
ENST00000268616	ENSG00000140948	ZCCHC14	4.4687e-17	9.39718e-15	-1.13981	0.135694	6.79224	0.402758	0.00491183	0.0319138	0.0229943	0.0319138	-1.6444
ENST00000612480	ENSG00000275131	AC241952.1	2.66245e-10	2.43625e-08	-1.13635	0.179881	5.59883	0.424411	0.00857465	0.0561394	0.0408032	0.0561394	-1.63941
ENST00000258672	ENSG00000136169	SETDB2	2.46251e-08	1.60459e-06	-1.13524	0.203597	5.22584	0.424124	0.0260443	0.0391773	0.0568595	0.0568595	-1.6378
ENST00000379070	ENSG00000101290	CDS2	4.46355e-10	3.94055e-08	-1.13353	0.181746	5.55242	0.396182	0.0237756	0.0101378	0.0422879	0.0422879	-1.63534
ENST00000392668	ENSG00000134954	ETS1	9.86736e-05	0.00285778	-1.13076	0.290399	6.77351	0.509891	0.0174041	0.151259	0.0231166	0.151259	-1.63135
ENST00000264399	ENSG00000138669	PRKG2	2.53289e-11	2.78877e-09	-1.13068	0.169481	6.3242	0.414509	0.0220025	0.0354448	0.0269951	0.0354448	-1.63123
ENST00000508895	ENSG00000145335	SNCA	6.96869e-05	0.00210469	-1.12807	0.283623	6.36999	0.501484	0.0317458	0.129138	0.0265033	0.129138	-1.62746
ENST00000281455	ENSG00000151726	ACSL1	3.04192e-09	2.30658e-07	-1.12566	0.189846	6.99613	0.423817	0.00864187	0.0634414	0.0218526	0.0634414	-1.62398
ENST00000366597	ENSG00000168243	GNG4	2.35013e-05	0.000811495	-1.1189	0.264595	4.7241	0.406505	0.0349492	0.0219937	0.105072	0.105072	-1.61423
ENST00000332536	ENSG00000128298	BAIAP2L2	0.000182643	0.00491351	-1.11055	0.29679	5.71963	0.503382	0.0912106	0.084958	0.0373923	0.084958	-1.60219
ENST00000406439	ENSG00000198198	SZT2	1.60525e-09	1.29247e-07	-1.1081	0.18366	5.32912	0.386381	0.0162701	0.0252115	0.0511923	0.0511923	-1.59865
ENST00000361981	ENSG00000198910	L1CAM	5.89211e-24	2.24142e-21	-1.1066	0.109633	8.24686	0.35963	0.00250354	0.00887854	0.0215352	0.0215352	-1.59648
ENST00000377532	ENSG00000049246	PER3	0.00177922	0.0339849	-1.10637	0.354062	6.95425	0.372063	0.22866	-0.202607	0.0220594	0.0220594	-1.59616
ENST00000423729	ENSG00000185818	NAT8L	0.00037448	0.00907233	-1.105	0.310617	6.23131	0.447178	0.16488	-0.0501812	0.0280854	0.0280854	-1.59418
ENST00000521349	ENSG00000158669	GPAT4	5.99447e-12	7.28732e-10	-1.10379	0.160439	5.65225	0.381665	0.0122632	0.026897	0.0392183	0.0392183	-1.59243
ENST00000369103	ENSG00000148908	RGS10	2.03232e-09	1.59646e-07	-1.09298	0.182309	6.64524	0.398292	0.0189902	0.0474829	0.0240385	0.0474829	-1.57683
ENST00000460120	ENSG00000163755	HPS3	1.14024e-06	5.32948e-05	-1.09173	0.224371	5.94953	0.372681	0.0683162	-0.030815	0.0323685	0.0323685	-1.57504
ENST00000369209	ENSG00000165868	HSPA12A	2.50717e-17	5.44128e-15	-1.08667	0.128334	6.15451	0.353935	0.00384611	0.0154609	0.0290933	0.0290933	-1.56773
ENST00000281038	ENSG00000137513	NARS2	1.73152e-08	1.1678e-06	-1.08522	0.192521	6.90045	0.400025	0.00356912	0.0705596	0.0223457	0.0705596	-1.56564
ENST00000344204	ENSG00000038382	TRIO	0.000123037	0.00346267	-1.08374	0.282225	6.86977	0.388349	0.136782	-0.0752087	0.0225196	0.0225196	-1.56351
ENST00000293971	ENSG00000162066	AMDHD2	9.56899e-05	0.00278622	-1.08371	0.277784	5.7125	0.467833	0.0211839	0.133144	0.037577	0.133144	-1.56346
ENST00000366783	ENSG00000143801	PSEN2	9.52258e-13	1.28447e-10	-1.08359	0.151822	6.54583	0.37499	0.0122124	0.0338873	0.0248452	0.0338873	-1.56329
ENST00000327355	ENSG00000185442	FAM174B	1.05009e-07	6.03607e-06	-1.08335	0.203719	5.40376	0.406471	0.0103751	0.0726281	0.0478202	0.0726281	-1.56294
ENST00000449030	ENSG00000042493	CAPG	1.3793e-08	9.46267e-07	-1.07721	0.189785	7.53325	0.393284	0.00691004	0.065127	0.0203606	0.065127	-1.55409
ENST00000502249	ENSG00000154608	CEP170P1	1.84949e-06	8.2827e-05	-1.07652	0.225722	5.26243	0.418456	0.0137443	0.088157	0.0547128	0.088157	-1.55309
ENST00000316418	ENSG00000063438	AHRR	7.22937e-13	9.92946e-11	-1.07284	0.149524	5.84086	0.367181	0.00739739	0.0373177	0.0345336	0.0373177	-1.54778
ENST00000266970	ENSG00000123374	CDK2	1.70168e-13	2.53244e-11	-1.06912	0.145057	8.62381	0.362651	0.000442337	0.0416409	0.023764	0.0416409	-1.54242
ENST00000342711	ENSG00000171219	CDC42BPG	5.51913e-05	0.0017222	-1.06652	0.264483	4.5974	0.444907	0.0147831	0.125119	0.123901	0.125119	-1.53866
ENST00000424100	ENSG00000164604	GPR85	4.24782e-05	0.00136448	-1.06537	0.260255	4.69936	0.37169	0.0269531	0.0283467	0.108512	0.108512	-1.537
ENST00000466335	ENSG00000165996	HACD1	5.38631e-05	0.00168593	-1.06524	0.263791	4.66442	0.353611	0.0256071	0.00869366	0.113564	0.113564	-1.53682
ENST00000437877	ENSG00000002822	MAD1L1	9.11208e-08	5.32361e-06	-1.05072	0.196631	5.7705	0.381713	0.00708529	0.0702426	0.0361303	0.0702426	-1.51587
ENST00000320892	ENSG00000151692	RNF144A	2.23031e-09	1.73987e-07	-1.04596	0.174907	7.69073	0.365025	0.000625088	0.0605601	0.0203092	0.0605601	-1.509
ENST00000325366	ENSG00000082213	C5orf22	1.45712e-05	0.000529892	-1.04166	0.240287	6.46453	0.332013	0.0899054	-0.0642437	0.0255703	0.0255703	-1.5028
ENST00000377411	ENSG00000180758	GPR157	8.95719e-10	7.50641e-08	-1.03772	0.16937	6.69365	0.356852	0.00216054	0.0552116	0.0236733	0.0552116	-1.49711
ENST00000374049	ENSG00000157693	TMEM268	2.64433e-12	3.39121e-10	-1.03674	0.148202	5.89849	0.336615	0.0105844	0.0238591	0.033343	0.033343	-1.49569
ENST00000319248	ENSG00000117450	PRDX1	2.54629e-10	2.34581e-08	-1.03418	0.163529	8.62463	0.351422	0.000736205	0.0527469	0.0237704	0.0527469	-1.492
ENST00000531648	ENSG00000149179	C11orf49	7.92256e-05	0.00236118	-1.03127	0.261297	4.61887	0.404839	0.0160559	0.101752	0.120496	0.120496	-1.4878
ENST00000323534	ENSG00000181467	RAP2B	1.21532e-19	3.2786e-17	-1.02925	0.113507	6.70927	0.316621	0.00220792	0.0140618	0.0235599	0.0235599	-1.4849
ENST00000361144	ENSG00000189337	KAZN	6.05002e-05	0.00186635	-1.02717	0.256099	6.68981	0.333608	0.107471	-0.0699573	0.0237016	0.0237016	-1.4819
ENST00000375754	ENSG00000165025	SYK	0.00149248	0.0293695	-1.02342	0.322222	7.2082	0.333851	0.186641	-0.14628	0.0210131	0.0210131	-1.47649
ENST00000559149	ENSG00000140471	LINS1	0.000734469	0.0161105	-1.02136	0.302502	5.20956	0.360172	0.125149	-0.0526733	0.0578657	0.0578657	-1.47351
ENST00000331758	ENSG00000184402	SS18L1	1.01324e-16	2.07034e-14	-1.02128	0.122998	7.51974	0.323938	0.000986729	0.0292702	0.020373	0.0292702	-1.47339
ENST00000361908	ENSG00000198836	OPA1	7.07324e-14	1.10104e-11	-1.02056	0.13632	8.07797	0.325298	0.0162444	0.0160903	0.0209218	0.0209218	-1.47235
ENST00000320816	ENSG00000153071	DAB2	1.54875e-16	3.10268e-14	-1.02048	0.123655	6.63083	0.310385	0.00643039	0.008556	0.0241506	0.0241506	-1.47225
ENST00000392185	ENSG00000130340	SNX9	6.29063e-06	0.000250711	-1.01897	0.225616	7.13639	0.383916	0.037849	0.063956	0.0212594	0.063956	-1.47006
ENST00000296051	ENSG00000163755	HPS3	8.81892e-05	0.00259407	-1.01681	0.259326	6.57215	0.356521	0.109876	-0.0385702	0.0246238	0.0246238	-1.46695
ENST00000310193	ENSG00000172817	CYP7B1	0.000173447	0.00470537	-1.01576	0.270519	5.78385	0.420242	0.00527896	0.141082	0.0358145	0.141082	-1.46543
ENST00000575774	ENSG00000262826	INTS3	1.04488e-15	1.91222e-13	-1.01377	0.126383	6.79034	0.315533	0.00893868	0.0166037	0.0230065	0.0230065	-1.46257
ENST00000476843	ENSG00000143624	INTS3	1.04488e-15	1.91222e-13	-1.01377	0.126383	6.79034	0.315533	0.00893868	0.0166037	0.0230065	0.0230065	-1.46257
ENST00000562687	ENSG00000260644	HERC2P5	2.59782e-06	0.000113196	-1.01374	0.215675	5.04771	0.348885	0.0233287	0.0411491	0.0697027	0.0697027	-1.46251
ENST00000228928	ENSG00000111331	OAS3	8.6821e-08	5.10322e-06	-1.01226	0.189125	6.22936	0.354081	0.00404767	0.0674888	0.0281096	0.0674888	-1.46038
ENST00000565500	ENSG00000103994	ZNF106	1.26006e-08	8.75998e-07	-1.00948	0.177369	5.75334	0.334504	0.0263739	0.0242007	0.0365454	0.0365454	-1.45636
ENST00000370035	ENSG00000162636	FAM102B	1.55448e-17	3.49697e-15	-1.00829	0.118302	7.81043	0.314464	0.000659283	0.0273315	0.020385	0.0273315	-1.45466
ENST00000513604	ENSG00000169247	SH3TC2	4.64083e-09	3.44566e-07	-1.00667	0.1718	5.58383	0.314527	0.017759	0.0113923	0.0412715	0.0412715	-1.45232
ENST00000451311	ENSG00000205542	TMSB4X	6.78487e-08	4.0657e-06	-1.0065	0.1865	8.61969	0.349068	0.000338101	0.0692267	0.0237327	0.0692267	-1.45207
ENST00000366654	ENSG00000182118	FAM89A	1.52139e-07	8.47189e-06	-1.00504	0.191438	7.24654	0.351427	0.00154237	0.0717545	0.020897	0.0717545	-1.44996
ENST00000367937	ENSG00000079950	STX7	6.91133e-11	7.03739e-09	-1.00477	0.154045	6.44933	0.329124	0.00529955	0.0421599	0.0257134	0.0421599	-1.44957
ENST00000409402	ENSG00000134278	SPIRE1	1.56344e-06	7.12298e-05	-1.00364	0.208963	5.92417	0.35853	0.0544871	0.0280352	0.0328438	0.0328438	-1.44794
ENST00000254508	ENSG00000132182	NUP210	5.36193e-13	7.48603e-11	-0.997238	0.138202	6.94862	0.316881	0.00136826	0.0368313	0.0220883	0.0368313	-1.43871
ENST00000474041	ENSG00000162894	FCMR	6.87709e-06	0.000271685	-0.992935	0.220777	4.95686	0.357421	0.0195457	0.0688061	0.0779392	0.0779392	-1.4325
ENST00000375980	ENSG00000142634	EFHD2	1.22134e-13	1.85427e-11	-0.988061	0.133262	7.37593	0.309376	0.00128977	0.0342276	0.0205833	0.0342276	-1.42547
ENST00000256246	ENSG00000133863	TEX15	4.85617e-08	2.9947e-06	-0.985994	0.180701	5.22754	0.316642	0.00854983	0.0368044	0.0567558	0.0567558	-1.42249
ENST00000263805	ENSG00000103994	ZNF106	5.20026e-16	9.91903e-14	-0.985721	0.121593	8.90892	0.302959	0.000327755	0.029242	0.0263765	0.029242	-1.42209
ENST00000392011	ENSG00000130147	SH3BP4	3.40079e-18	8.10837e-16	-0.985091	0.113265	8.47628	0.291953	0.0029176	0.014227	0.0227403	0.0227403	-1.42118
ENST00000243662	ENSG00000123892	RAB38	8.85793e-05	0.00260216	-0.983918	0.251005	7.41696	0.384604	0.0011515	0.124855	0.0205086	0.124855	-1.41949
ENST00000539397	ENSG00000135828	RNASEL	1.45634e-05	0.000529892	-0.983898	0.226956	4.88408	0.30242	0.0175685	0.0125696	0.0854497	0.0854497	-1.41946
ENST00000505747	ENSG00000138050	THUMPD2	0.000445682	0.0105593	-0.975416	0.277782	5.8283	0.296012	0.119519	-0.0913175	0.0348068	0.0348068	-1.40723
ENST00000524204	ENSG00000181163	NPM1	1.21688e-05	0.00045274	-0.975302	0.22295	5.03238	0.325464	0.0284052	0.0342308	0.0710078	0.0710078	-1.40706
ENST00000388995	ENSG00000188522	FAM83G	4.67943e-10	4.11504e-08	-0.972033	0.156037	5.78481	0.311695	0.0063674	0.0423278	0.035792	0.0423278	-1.40235
ENST00000396085	ENSG00000166833	NAV2	0.000177005	0.00478084	-0.971638	0.25912	7.20179	0.38484	0.0705103	0.0637762	0.0210335	0.0637762	-1.40178
ENST00000534038	ENSG00000103811	CTSH	1.89458e-08	1.27143e-06	-0.970726	0.172685	5.92846	0.320351	0.0112996	0.0483407	0.0327621	0.0483407	-1.40046
ENST00000520511	ENSG00000156804	FBXO32	4.00295e-11	4.20888e-09	-0.970364	0.146936	5.80268	0.290322	0.00780113	0.0170387	0.0353795	0.0353795	-1.39994
ENST00000262109	ENSG00000104714	ERICH1	5.75444e-10	4.98912e-08	-0.970172	0.156555	5.93336	0.31094	0.00560638	0.0434124	0.0326695	0.0434124	-1.39966
ENST00000370056	ENSG00000134215	VAV3	4.00421e-07	2.06188e-05	-0.966558	0.190689	7.18552	0.32926	0.00139793	0.0713269	0.0210867	0.0713269	-1.39445
ENST00000519853	ENSG00000158669	GPAT4	3.27908e-05	0.00108841	-0.96459	0.232254	5.17851	0.308973	0.0480103	0.00231388	0.0598737	0.0598737	-1.39161
ENST00000622205	ENSG00000275947	TMEM251	2.23772e-08	1.46967e-06	-0.964373	0.172439	5.36575	0.309548	0.0100052	0.0411297	0.0494654	0.0494654	-1.3913
ENST00000415050	ENSG00000153485	TMEM251	2.23772e-08	1.46967e-06	-0.964373	0.172439	5.36575	0.309548	0.0100052	0.0411297	0.0494654	0.0494654	-1.3913
ENST00000492783	ENSG00000025039	RRAGD	2.08094e-10	1.95162e-08	-0.962397	0.151434	5.76842	0.291389	0.0096842	0.0215331	0.03618	0.03618	-1.38844
ENST00000485527	ENSG00000115350	POLE4	3.4253e-10	3.08838e-08	-0.961955	0.153222	5.69409	0.299798	0.00889098	0.0324208	0.0380627	0.0380627	-1.38781
ENST00000395564	ENSG00000183696	UPP1	4.18377e-06	0.000174015	-0.954788	0.207471	6.81782	0.334253	0.00531834	0.0807699	0.022832	0.0807699	-1.37747
ENST00000421804	ENSG00000153208	MERTK	7.57734e-06	0.000296238	-0.953137	0.212906	5.44685	0.334916	0.0445738	0.0433381	0.0460844	0.0460844	-1.37509
ENST00000357436	ENSG00000100092	SH3BP1	2.81466e-06	0.00012186	-0.952491	0.203354	5.96421	0.330102	0.0121487	0.0705571	0.0321012	0.0705571	-1.37415
ENST00000380498	ENSG00000129226	CD68	0.000851	0.0182585	-0.952359	0.285509	5.27245	0.269417	0.10888	-0.0968894	0.0541515	0.0541515	-1.37396
ENST00000262741	ENSG00000117461	PIK3R3	8.9118e-07	4.26463e-05	-0.952109	0.193744	7.58024	0.323352	0.0119202	0.0631533	0.0203273	0.0631533	-1.3736
ENST00000430077	ENSG00000130821	SLC6A8	5.21927e-15	9.06186e-13	-0.951817	0.121692	6.6974	0.274617	0.00597203	0.01243	0.0236459	0.0236459	-1.37318
ENST00000354234	ENSG00000136169	SETDB2	4.12281e-08	2.57773e-06	-0.949538	0.173099	6.12192	0.293046	0.0303732	0.0109732	0.0295536	0.0295536	-1.36989
ENST00000547630	ENSG00000111412	C12orf49	6.74608e-05	0.00204658	-0.945735	0.23732	5.19889	0.352097	0.0501774	0.0624638	0.058542	0.0624638	-1.36441
ENST00000394991	ENSG00000145335	SNCA	2.54521e-05	0.000870864	-0.945083	0.224445	6.8831	0.341553	0.00790158	0.0928496	0.0224431	0.0928496	-1.36347
ENST00000297205	ENSG00000164647	STEAP1	9.36201e-11	9.32249e-09	-0.940761	0.145248	5.79443	0.268067	0.00662568	0.0111087	0.0355685	0.0355685	-1.35723
ENST00000320474	ENSG00000169255	B3GALNT1	0.000158252	0.00434188	-0.934573	0.247389	5.84548	0.354467	0.0184496	0.103953	0.0344346	0.103953	-1.3483
ENST00000443124	ENSG00000115109	EPB41L5	0.000132139	0.00370039	-0.932868	0.244051	4.81651	0.273402	0.0259238	0.00296455	0.0931976	0.0931976	-1.34584
ENST00000536315	ENSG00000100784	RPS6KA5	8.24712e-08	4.86868e-06	-0.932735	0.173965	6.47416	0.30045	0.0106738	0.0498535	0.025481	0.0498535	-1.34565
ENST00000303924	ENSG00000170961	HAS2	2.97608e-05	0.00100308	-0.932569	0.223354	7.00198	0.334002	0.00169485	0.0980795	0.0218248	0.0980795	-1.34541
ENST00000396425	ENSG00000100167	2003-09-01	2.22929e-11	2.46251e-09	-0.930441	0.139076	5.91243	0.279759	0.00561454	0.0321977	0.0330697	0.0330697	-1.34234
ENST00000465242	ENSG00000115350	POLE4	2.77388e-09	2.11995e-07	-0.928451	0.156188	6.99286	0.288111	0.00218057	0.0466087	0.0218683	0.0466087	-1.33947
ENST00000522356	ENSG00000206077	ZDHHC11B	1.56462e-09	1.26125e-07	-0.926915	0.153525	6.18647	0.285883	0.00297971	0.04416	0.0286612	0.04416	-1.33725
ENST00000436258	ENSG00000189212	DPY19L2P1	0.00163898	0.0317813	-0.925809	0.294012	4.4292	0.273692	0.0191665	0.0144331	0.15372	0.15372	-1.33566
ENST00000614152	NA	NA	6.39049e-08	3.84811e-06	-0.925332	0.17112	6.67046	0.294837	0.0133342	0.0452296	0.0238458	0.0452296	-1.33497
ENST00000280326	ENSG00000150753	CCT5	3.606e-07	1.8797e-05	-0.925087	0.181794	5.53819	0.301166	0.0196464	0.0464517	0.0427645	0.0464517	-1.33462
ENST00000523582	ENSG00000104321	TRPA1	6.19301e-05	0.00190267	-0.924451	0.230805	5.06406	0.292301	0.0381947	0.0179533	0.0683472	0.0683472	-1.3337
ENST00000441640	ENSG00000081985	IL12RB2	8.35441e-05	0.00246846	-0.923631	0.234782	4.86807	0.322141	0.0230276	0.0684391	0.0872172	0.0872172	-1.33252
ENST00000367091	ENSG00000162894	FCMR	0.000157861	0.00433289	-0.922026	0.244028	4.79789	0.31307	0.0236301	0.058241	0.095469	0.095469	-1.3302
ENST00000281243	ENSG00000151552	QDPR	0.000170281	0.00463061	-0.921523	0.245121	6.96279	0.345631	0.07332	0.0468486	0.0220161	0.0468486	-1.32948
ENST00000544797	ENSG00000139116	KIF21A	0.000658859	0.0147562	-0.919046	0.26982	5.99549	0.292961	0.114055	-0.0538158	0.0315498	0.0315498	-1.3259
ENST00000356208	ENSG00000132819	RBM38	1.17642e-10	1.15783e-08	-0.91824	0.142532	5.94218	0.25006	0.00812614	0.00255553	0.0325045	0.0325045	-1.32474
ENST00000382496	ENSG00000112902	SEMA5A	2.98347e-09	2.26989e-07	-0.9176	0.154673	5.85883	0.281581	0.00525464	0.042593	0.0341518	0.042593	-1.32382
ENST00000479184	ENSG00000182287	AP1S2	1.35518e-05	0.000496824	-0.915731	0.210465	5.20298	0.315524	0.0104673	0.0781233	0.058281	0.0781233	-1.32112
ENST00000361271	ENSG00000165996	HACD1	0.000467868	0.0110053	-0.914093	0.261281	4.70726	0.330255	0.0291343	0.077641	0.107401	0.107401	-1.31876
ENST00000417314	ENSG00000163376	KBTBD8	6.53099e-06	0.000259679	-0.912491	0.202397	5.54498	0.308122	0.00538678	0.076542	0.042536	0.076542	-1.31644
ENST00000334205	ENSG00000162302	RPS6KA4	4.18542e-08	2.61205e-06	-0.907697	0.165552	6.38398	0.282388	0.0120658	0.0427493	0.0263584	0.0427493	-1.30953
ENST00000265801	ENSG00000061337	LZTS1	5.34143e-12	6.56415e-10	-0.904382	0.131142	7.79928	0.26317	0.00545079	0.0289458	0.0203737	0.0289458	-1.30475
ENST00000507716	ENSG00000113407	TARS	1.42875e-05	0.000520745	-0.903174	0.208134	6.62891	0.307326	0.0493525	0.0372868	0.0241657	0.0372868	-1.303
ENST00000343242	ENSG00000198517	MAFK	1.97779e-11	2.20267e-09	-0.900132	0.134195	6.02036	0.258287	0.00488764	0.0263688	0.0311288	0.0311288	-1.29861
ENST00000369713	ENSG00000148834	GSTO1	7.5208e-08	4.48457e-06	-0.89976	0.167296	8.48885	0.279284	0.000606759	0.0553689	0.0228196	0.0553689	-1.29808
ENST00000381237	ENSG00000104635	SLC39A14	9.17293e-17	1.89368e-14	-0.899244	0.108147	8.4156	0.245807	0.00101393	0.0162145	0.0223775	0.0223775	-1.29733
ENST00000414518	ENSG00000231939	HLA-DQB1	6.27266e-06	0.000250289	-0.898621	0.198943	5.60115	0.298568	0.00768811	0.0714682	0.0407318	0.0714682	-1.29643
ENST00000254301	ENSG00000131981	LGALS3	1.61983e-07	8.9978e-06	-0.895631	0.170974	8.88601	0.2793	0.000259455	0.0582051	0.0261327	0.0582051	-1.29212
ENST00000480148	ENSG00000146267	FAXC	0.000289771	0.00729415	-0.895392	0.247054	4.76711	0.246658	0.0227151	-0.0021891	0.0993562	0.0993562	-1.29178
ENST00000348624	ENSG00000242802	AP5Z1	4.06485e-12	5.05961e-10	-0.893707	0.128871	6.2283	0.248423	0.00509236	0.0184967	0.028123	0.028123	-1.28935
ENST00000457199	ENSG00000110172	CHORDC1	8.27793e-10	6.95439e-08	-0.888834	0.144773	6.44944	0.249594	0.016206	0.0116455	0.0257124	0.0257124	-1.28232
ENST00000337979	ENSG00000166900	STX3	1.89507e-14	3.10704e-12	-0.888611	0.116044	7.40393	0.248693	0.00128457	0.0256477	0.0205311	0.0256477	-1.28199
ENST00000394652	ENSG00000172349	IL16	1.59105e-08	1.08385e-06	-0.887655	0.157067	5.75921	0.267111	0.0129379	0.0360477	0.0364021	0.0364021	-1.28061
ENST00000510038	ENSG00000113648	H2AFY	0.000620615	0.0140162	-0.884914	0.258562	5.51876	0.261869	0.0902765	-0.0457865	0.0434323	0.0434323	-1.27666
ENST00000574427	ENSG00000167291	TBC1D16	6.22292e-05	0.00190925	-0.884293	0.220842	5.27562	0.250297	0.0435655	-0.0122108	0.0539767	0.0539767	-1.27576
ENST00000394987	ENSG00000167173	C15orf39	2.10638e-08	1.39559e-06	-0.884112	0.157792	6.05957	0.265847	0.0193025	0.0303004	0.030494	0.030494	-1.2755
ENST00000398246	ENSG00000154359	LONRF1	3.38658e-11	3.63992e-09	-0.87943	0.13267	6.60139	0.249054	0.0108181	0.0219454	0.0243846	0.0243846	-1.26875
ENST00000409379	ENSG00000160949	TONSL	2.67273e-05	0.000908525	-0.877751	0.209003	6.98704	0.295012	0.00222774	0.0851371	0.0218963	0.0851371	-1.26633
ENST00000538333	ENSG00000106683	LIMK1	9.55092e-05	0.00278306	-0.876452	0.224632	6.46986	0.305979	0.0111892	0.0897298	0.0255208	0.0897298	-1.26445
ENST00000488451	ENSG00000119185	ITGB1BP1	1.68671e-09	1.35163e-07	-0.874502	0.145135	6.14512	0.241849	0.0129049	0.0143338	0.0292237	0.0292237	-1.26164
ENST00000403825	ENSG00000006652	IFRD1	3.18846e-05	0.0010625	-0.872907	0.209855	7.15883	0.2932	0.00242626	0.085652	0.0211783	0.085652	-1.25934
ENST00000264350	ENSG00000138646	HERC5	9.37973e-08	5.46113e-06	-0.870497	0.163065	5.78775	0.234368	0.017457	0.00338416	0.0357233	0.0357233	-1.25586
ENST00000343855	ENSG00000188707	ZBED6CL	2.66978e-11	2.93472e-09	-0.869656	0.130506	6.05532	0.223479	0.0035025	0.00512255	0.0305612	0.0305612	-1.25465
ENST00000358024	ENSG00000133069	TMCC2	5.08824e-06	0.000207805	-0.864175	0.189466	6.24543	0.274909	0.00854051	0.063254	0.027911	0.063254	-1.24674
ENST00000377346	ENSG00000171608	PIK3CD	1.67043e-08	1.13223e-06	-0.863605	0.153038	7.91616	0.253239	0.000706381	0.0461349	0.0205355	0.0461349	-1.24592
ENST00000463666	ENSG00000151657	KIN	4.44097e-05	0.00142046	-0.863099	0.211375	5.51062	0.289434	0.0159949	0.0733643	0.0437182	0.0733643	-1.24519
ENST00000409339	ENSG00000146918	NCAPG2	4.98299e-05	0.00157523	-0.861595	0.212403	5.07316	0.284103	0.0226207	0.0613833	0.0676091	0.0676091	-1.24302
ENST00000306065	ENSG00000105186	ANKRD27	3.79072e-13	5.3915e-11	-0.861337	0.118595	7.46071	0.236083	0.00114452	0.0269851	0.0204419	0.0269851	-1.24265
ENST00000562306	ENSG00000166104	AC126323.1	4.89258e-05	0.00155099	-0.860019	0.211791	4.9541	0.271659	0.0115015	0.0588898	0.0782091	0.0782091	-1.24074
ENST00000244137	ENSG00000124299	PEPD	4.17465e-05	0.00134353	-0.858942	0.209621	7.36114	0.286122	0.00211921	0.0857626	0.0206132	0.0857626	-1.23919
ENST00000558207	ENSG00000157766	ACAN	0.000454219	0.010728	-0.856502	0.244269	4.85499	0.251397	0.0306424	0.0181225	0.0886918	0.0886918	-1.23567
ENST00000392456	ENSG00000152492	CCDC50	3.79801e-13	5.3915e-11	-0.856367	0.117915	6.68986	0.231273	0.00410672	0.0212573	0.0237012	0.0237012	-1.23547
ENST00000262318	ENSG00000103249	CLCN7	8.14245e-09	5.85297e-07	-0.855099	0.148314	7.22302	0.246622	0.0136368	0.030357	0.0209669	0.030357	-1.23365
ENST00000576768	ENSG00000167291	TBC1D16	5.02625e-07	2.54557e-05	-0.852751	0.169691	7.97931	0.25713	0.00299995	0.0545903	0.0206635	0.0545903	-1.23026
ENST00000317995	ENSG00000178538	CA8	3.80942e-05	0.00124132	-0.847678	0.20581	7.09738	0.277916	0.00160387	0.0831116	0.0214093	0.0831116	-1.22294
ENST00000420515	ENSG00000162585	FAAP20	0.000524065	0.0121113	-0.846254	0.244008	5.08058	0.231317	0.0520639	-0.0209087	0.0670155	0.0670155	-1.22089
ENST00000588569	ENSG00000141376	BCAS3	6.79631e-05	0.00205813	-0.84269	0.211555	6.26835	0.279617	0.00468367	0.0848277	0.0276348	0.0848277	-1.21574
ENST00000556438	ENSG00000131981	LGALS3	1.85926e-11	2.08092e-09	-0.840045	0.125069	6.4731	0.220905	0.00579355	0.0167035	0.0254908	0.0254908	-1.21193
ENST00000462069	ENSG00000114405	C3orf14	1.34494e-07	7.54516e-06	-0.839537	0.159226	5.70762	0.235191	0.0130014	0.0264477	0.0377043	0.0377043	-1.21119
ENST00000530336	ENSG00000100504	PYGL	2.19718e-08	1.44725e-06	-0.83905	0.149945	6.40703	0.239687	0.00400463	0.0409624	0.0261252	0.0409624	-1.21049
ENST00000302506	ENSG00000164045	CDC25A	1.27651e-10	1.24548e-08	-0.838231	0.130364	6.62816	0.228578	0.00981778	0.0226466	0.0241716	0.0241716	-1.20931
ENST00000407643	ENSG00000136295	TTYH3	1.04521e-05	0.000395387	-0.837733	0.190065	6.76213	0.217647	0.0490573	-0.0290682	0.0231925	0.0231925	-1.20859
ENST00000355415	ENSG00000161091	MFSD12	1.80904e-05	0.000641675	-0.835337	0.194842	9.31522	0.264448	0.000210887	0.0757163	0.0318757	0.0757163	-1.20514
ENST00000298198	ENSG00000165434	PGM2L1	1.80078e-06	8.08596e-05	-0.832732	0.174409	5.31436	0.21731	0.0089079	0.0134729	0.0519293	0.0519293	-1.20138
ENST00000613183	ENSG00000066697	MSANTD3	5.2873e-06	0.000215285	-0.828292	0.18192	6.02387	0.245234	0.0351194	0.0222975	0.0310705	0.0310705	-1.19497
ENST00000369025	ENSG00000146285	SCML4	6.80955e-06	0.000269446	-0.82673	0.183736	5.66618	0.253153	0.00955792	0.0579599	0.0388254	0.0579599	-1.19272
ENST00000473385	ENSG00000082512	TRAF5	0.000208782	0.0055202	-0.825605	0.222646	5.15812	0.227147	0.0378842	-8.67563e-05	0.0612585	0.0612585	-1.1911
ENST00000441236	ENSG00000132600	PRMT7	3.76444e-05	0.00122785	-0.825136	0.200204	6.33262	0.263239	0.0128563	0.0673067	0.0269025	0.0673067	-1.19042
ENST00000399075	ENSG00000164096	C4orf3	6.04047e-12	7.33008e-10	-0.823639	0.119738	6.44629	0.21726	0.00293194	0.0244114	0.0257423	0.0257423	-1.18826
ENST00000531066	ENSG00000166689	PLEKHA7	0.000396349	0.00951701	-0.822151	0.232082	4.95482	0.250913	0.0295851	0.0378359	0.078139	0.078139	-1.18611
ENST00000308873	ENSG00000020633	RUNX3	2.55842e-05	0.0008745	-0.816315	0.193918	7.49553	0.254856	0.00846772	0.0667409	0.0203983	0.0667409	-1.17769
ENST00000469224	ENSG00000023330	ALAS1	1.13555e-05	0.000425993	-0.815876	0.185865	6.96991	0.249408	0.0130891	0.0560028	0.0219805	0.0560028	-1.17706
ENST00000296930	ENSG00000181163	NPM1	2.05526e-05	0.000720705	-0.815774	0.19155	5.93469	0.220354	0.0407384	-0.00548752	0.0326446	0.0326446	-1.17691
ENST00000567404	ENSG00000197006	METTL9	5.27867e-08	3.22594e-06	-0.815632	0.149887	6.33164	0.228586	0.00861402	0.036318	0.0269133	0.036318	-1.17671
ENST00000557769	ENSG00000205476	CCDC85C	1.70509e-05	0.000608608	-0.814312	0.189358	5.5671	0.250927	0.00957806	0.0621351	0.041807	0.0621351	-1.1748
ENST00000548815	ENSG00000158747	NBL1	5.06941e-06	0.000207161	-0.813451	0.178314	7.98647	0.243565	0.00390674	0.0596853	0.0206798	0.0596853	-1.17356
ENST00000396987	ENSG00000158669	GPAT4	1.66926e-05	0.000597415	-0.812083	0.188634	7.62683	0.249421	0.00138615	0.0697792	0.0203094	0.0697792	-1.17159
ENST00000322349	ENSG00000102189	EEA1	1.33688e-07	7.50732e-06	-0.808018	0.153216	7.03437	0.226784	0.00127311	0.0456772	0.0216759	0.0456772	-1.16572
ENST00000370251	ENSG00000063587	ZNF275	2.28758e-07	1.24018e-05	-0.807961	0.156149	5.5445	0.192541	0.00621272	0.000818216	0.042552	0.042552	-1.16564
ENST00000393820	ENSG00000181163	NPM1	8.74903e-12	1.02495e-09	-0.80794	0.118367	9.01874	0.191107	0.000385637	0.00498379	0.0276359	0.0276359	-1.16561
ENST00000398208	ENSG00000160193	WDR4	3.50328e-06	0.000148819	-0.807896	0.174158	5.46778	0.233367	0.01538	0.0393161	0.0452821	0.0452821	-1.16555
ENST00000317506	ENSG00000141084	RANBP10	0.00109388	0.0226305	-0.807654	0.247352	6.41717	0.214736	0.0963418	-0.0632514	0.0260246	0.0260246	-1.1652
ENST00000612090	NA	NA	1.06776e-07	6.11167e-06	-0.807519	0.151938	5.96831	0.225885	0.0112958	0.0348745	0.0320276	0.0348745	-1.165
ENST00000358713	ENSG00000167491	GATAD2A	5.46374e-12	6.70229e-10	-0.806808	0.117048	7.39059	0.207165	0.00684508	0.0178683	0.0205553	0.0205553	-1.16398
ENST00000619091	ENSG00000244306	AL589743.1	6.90681e-06	0.0002727	-0.805954	0.179239	5.9204	0.240663	0.00439824	0.0598547	0.0329159	0.0598547	-1.16274
ENST00000338560	ENSG00000187688	TRPV2	4.03988e-08	2.53055e-06	-0.804689	0.146598	8.18838	0.221849	0.000634278	0.0423475	0.0212977	0.0423475	-1.16092
ENST00000264670	ENSG00000037474	NSUN2	2.36121e-13	3.44578e-11	-0.803595	0.109682	7.40865	0.1902	0.00353759	0.00310727	0.0205228	0.0205228	-1.15934
ENST00000475836	ENSG00000163584	RPL22L1	7.97119e-06	0.000310025	-0.803449	0.179905	5.32073	0.189955	0.0131233	-0.0066861	0.0516084	0.0516084	-1.15913
ENST00000329673	ENSG00000183580	FBXL7	4.12422e-06	0.000172172	-0.802272	0.174217	5.64074	0.224606	0.0211539	0.0263398	0.0395491	0.0395491	-1.15743
ENST00000334444	ENSG00000114770	ABCC5	1.19596e-11	1.37025e-09	-0.800223	0.118015	6.88181	0.200007	0.00540457	0.0144843	0.0224504	0.0224504	-1.15448
ENST00000306846	ENSG00000172239	PAIP1	3.02141e-10	2.74985e-08	-0.798829	0.126845	6.58173	0.209904	0.00615815	0.0260212	0.0245446	0.0260212	-1.15247
ENST00000340828	ENSG00000113328	CCNG1	6.72559e-06	0.00026679	-0.796438	0.1769	8.05313	0.234879	0.00253155	0.0600557	0.02085	0.0600557	-1.14902
ENST00000482384	ENSG00000031698	SARS	7.96438e-05	0.00237051	-0.796097	0.201775	5.06194	0.222634	0.0129052	0.0355778	0.0685211	0.0685211	-1.14852
ENST00000534180	ENSG00000167996	FTH1	1.14148e-07	6.47888e-06	-0.795784	0.150074	7.57949	0.215143	0.0247164	0.0151923	0.0203278	0.0203278	-1.14807
ENST00000340848	ENSG00000167291	TBC1D16	2.67171e-08	1.72788e-06	-0.793955	0.142754	7.48745	0.215039	0.00438918	0.0363683	0.0204077	0.0363683	-1.14543
ENST00000418032	ENSG00000167491	GATAD2A	0.000112786	0.00321021	-0.793545	0.205513	7.08851	0.252322	0.00725572	0.0772152	0.021445	0.0772152	-1.14484
ENST00000592558	ENSG00000178982	EIF3K	4.09591e-05	0.00132196	-0.792806	0.193273	5.48727	0.198625	0.0301512	-0.00793617	0.0445576	0.0445576	-1.14378
ENST00000261991	NA	NA	0.000150305	0.00414736	-0.791734	0.20887	6.24957	0.253886	0.00799584	0.0792572	0.0278606	0.0792572	-1.14223
ENST00000615999	ENSG00000103811	CTSH	1.53298e-06	6.9948e-05	-0.790455	0.164442	6.91001	0.224876	0.00332691	0.0507555	0.0222931	0.0507555	-1.14038
ENST00000596802	ENSG00000127511	SIN3B	3.66282e-09	2.74968e-07	-0.790328	0.133982	6.00147	0.187997	0.00445537	0.0066686	0.0314472	0.0314472	-1.1402
ENST00000596655	ENSG00000167747	C19orf48	0.000220947	0.00580784	-0.789253	0.213671	5.39814	0.238795	0.0432557	0.0276983	0.0480548	0.0480548	-1.13865
ENST00000325590	ENSG00000078053	AMPH	0.000110802	0.00316437	-0.788556	0.203992	5.63547	0.248999	0.00457885	0.0786462	0.0397024	0.0786462	-1.13765
ENST00000342348	ENSG00000008130	NADK	0.000337119	0.00825882	-0.786034	0.219258	5.54562	0.24447	0.0536338	0.0256308	0.0425146	0.0425146	-1.13401
ENST00000350028	ENSG00000100347	SAMM50	2.00209e-08	1.3396e-06	-0.785868	0.140038	8.39721	0.210072	0.000386216	0.0388351	0.022274	0.0388351	-1.13377
ENST00000005260	ENSG00000006453	BAIAP2L1	1.08532e-11	1.25196e-09	-0.785154	0.115554	7.34255	0.199024	0.00141984	0.0252855	0.0206529	0.0252855	-1.13274
ENST00000518738	ENSG00000155097	ATP6V1C1	1.60837e-08	1.09455e-06	-0.785145	0.138974	7.82113	0.209239	0.000915349	0.0377122	0.0203966	0.0377122	-1.13272
ENST00000367941	ENSG00000079950	STX7	0.00011349	0.00322752	-0.784721	0.203307	7.63532	0.246797	0.000786098	0.0818816	0.0203078	0.0818816	-1.13211
ENST00000354617	ENSG00000134955	SLC37A2	8.06673e-05	0.00239677	-0.784606	0.199017	5.32889	0.243787	0.0126072	0.0666083	0.0512036	0.0666083	-1.13195
ENST00000444840	ENSG00000131368	MRPS25	1.4783e-06	6.75896e-05	-0.783327	0.162714	5.62905	0.213574	0.0130604	0.0315759	0.039891	0.039891	-1.1301
ENST00000242108	ENSG00000122547	EEPD1	0.000511711	0.0118541	-0.782129	0.225102	4.93603	0.19067	0.0213383	-0.00279925	0.0800037	0.0800037	-1.12837
ENST00000350796	ENSG00000008256	CYTH3	7.85072e-14	1.21092e-11	-0.779347	0.104291	8.13733	0.18773	0.000641065	0.0159171	0.0211122	0.0211122	-1.12436
ENST00000261318	ENSG00000111412	C12orf49	3.41867e-14	5.44679e-12	-0.777125	0.102504	7.75737	0.183264	0.000675124	0.0118253	0.0203391	0.0203391	-1.12115
ENST00000308683	ENSG00000173545	ZNF622	1.07907e-10	1.0698e-08	-0.776077	0.120221	6.40174	0.179995	0.0027279	0.00650065	0.0261782	0.0261782	-1.11964
ENST00000360578	ENSG00000171368	TPPP	8.82681e-09	6.2981e-07	-0.774825	0.134709	7.51251	0.202638	0.000935558	0.0353573	0.0203801	0.0353573	-1.11784
ENST00000264712	ENSG00000084731	KIF3C	5.58231e-08	3.38705e-06	-0.770772	0.141903	7.40175	0.204259	0.00353824	0.0367346	0.0205349	0.0367346	-1.11199
ENST00000402774	ENSG00000118246	FASTKD2	8.38159e-09	6.00574e-07	-0.768375	0.133385	7.02034	0.199185	0.0131802	0.0224027	0.0217394	0.0224027	-1.10853
ENST00000542061	ENSG00000112787	FBRSL1	0.000187213	0.00502646	-0.767861	0.205548	5.07331	0.240889	0.0109671	0.073533	0.0675975	0.073533	-1.10779
ENST00000356221	ENSG00000130177	CDC16	7.56494e-12	8.98675e-10	-0.758151	0.110735	7.6308	0.18176	0.00421575	0.0162394	0.0203086	0.0203086	-1.09378
ENST00000395862	ENSG00000155097	ATP6V1C1	1.29038e-11	1.47345e-09	-0.756595	0.111762	7.81422	0.184966	0.000888275	0.0240931	0.020389	0.0240931	-1.09154
ENST00000502942	ENSG00000171234	UGT2B7	5.38272e-05	0.00168585	-0.755876	0.187174	5.74908	0.223301	0.00728729	0.0627811	0.0366502	0.0627811	-1.0905
ENST00000542214	ENSG00000114405	C3orf14	7.72897e-06	0.00030095	-0.752082	0.168155	6.66494	0.210081	0.0082436	0.0483085	0.0238876	0.0483085	-1.08502
ENST00000460110	ENSG00000015676	NUDCD3	5.98489e-06	0.000240793	-0.750017	0.165679	7.34489	0.207778	0.00163812	0.0532611	0.0206477	0.0532611	-1.08204
ENST00000261741	ENSG00000122965	RBM19	1.0131e-07	5.84823e-06	-0.748119	0.140509	6.49827	0.192867	0.0142239	0.0242271	0.0252615	0.0252615	-1.07931
ENST00000340305	ENSG00000188807	TMEM201	7.11805e-13	9.79643e-11	-0.747668	0.104173	7.39594	0.167935	0.0011588	0.00842937	0.0205454	0.0205454	-1.07866
ENST00000278829	ENSG00000221968	FADS3	4.75176e-06	0.000195478	-0.746005	0.163045	5.68849	0.190422	0.014954	0.0216968	0.0382132	0.0382132	-1.07626
ENST00000443358	ENSG00000177192	PUS1	0.00010069	0.00290746	-0.74583	0.191783	5.58295	0.207419	0.032262	0.0243055	0.0412995	0.0412995	-1.076
ENST00000585124	ENSG00000178999	AURKB	1.14099e-05	0.000427795	-0.744671	0.169684	6.19912	0.177223	0.0290902	-0.00717468	0.0284953	0.0284953	-1.07433
ENST00000256720	ENSG00000134324	LPIN1	1.56423e-06	7.12298e-05	-0.744141	0.154937	7.53848	0.199365	0.00185056	0.0461606	0.0203561	0.0461606	-1.07357
ENST00000309241	ENSG00000155846	PPARGC1B	1.31417e-09	1.07472e-07	-0.743069	0.122504	6.29729	0.176997	0.002717	0.0197292	0.0272976	0.0272976	-1.07202
ENST00000622317	ENSG00000151131	C12orf45	5.93605e-05	0.00183622	-0.742684	0.184962	5.22785	0.184872	0.0116841	0.0201404	0.0567375	0.0567375	-1.07147
ENST00000345146	ENSG00000138413	IDH1	2.82306e-06	0.000122146	-0.741883	0.158411	8.54043	0.200272	0.000570347	0.0496175	0.0231602	0.0496175	-1.07031
ENST00000519531	ENSG00000101199	ARFGAP1	0.000236362	0.00613681	-0.739696	0.20119	5.12825	0.202733	0.0175727	0.0365658	0.0633822	0.0633822	-1.06715
ENST00000322177	ENSG00000178718	RPP25	8.2364e-09	5.90796e-07	-0.738572	0.128145	7.39205	0.184005	0.00108629	0.0317562	0.0205526	0.0317562	-1.06553
ENST00000488038	ENSG00000100364	KIAA0930	0.000147553	0.00407473	-0.738186	0.194508	7.62687	0.220548	0.00824328	0.0674232	0.0203094	0.0674232	-1.06498
ENST00000380672	ENSG00000173068	BNC2	6.71401e-05	0.00203959	-0.732178	0.183678	6.49264	0.211003	0.0024503	0.065025	0.0253122	0.065025	-1.05631
ENST00000194530	ENSG00000082146	STRADB	2.91388e-10	2.65555e-08	-0.730329	0.115865	7.2473	0.165693	0.00595447	0.00956034	0.0208948	0.0208948	-1.05364
ENST00000298532	ENSG00000165684	SNAPC4	4.88583e-06	0.000200142	-0.727819	0.159273	6.12425	0.194837	0.00340093	0.0473349	0.02952	0.0473349	-1.05002
ENST00000309061	ENSG00000141994	DUS3L	2.36986e-06	0.000104337	-0.726606	0.153974	6.082	0.191487	0.00697209	0.0404439	0.0301463	0.0404439	-1.04827
ENST00000399916	ENSG00000020633	RUNX3	7.66882e-06	0.000298779	-0.723848	0.161782	7.55301	0.19457	0.0050581	0.0472885	0.0203448	0.0472885	-1.04429
ENST00000295822	ENSG00000163577	EIF5A2	1.36038e-05	0.000498459	-0.723588	0.166336	7.41346	0.197024	0.000968868	0.0543663	0.0205145	0.0543663	-1.04392
ENST00000488973	ENSG00000064961	HMG20B	1.12204e-06	5.25535e-05	-0.72347	0.148589	6.2285	0.170755	0.016037	0.00870742	0.0281204	0.0281204	-1.04375
ENST00000377307	ENSG00000147799	ARHGAP39	7.19529e-07	3.50514e-05	-0.723378	0.14596	5.75525	0.185226	0.0061099	0.0355621	0.0364985	0.0364985	-1.04361
ENST00000502897	ENSG00000113387	SUB1	1.41519e-06	6.47917e-05	-0.72201	0.149706	6.01118	0.162774	0.0135413	0.00259578	0.0312824	0.0312824	-1.04164
ENST00000309602	ENSG00000173621	LRFN4	1.26706e-05	0.000468832	-0.720641	0.165068	5.45109	0.190679	0.00857526	0.0407754	0.0459197	0.0459197	-1.03966
ENST00000380668	ENSG00000101911	PRPS2	2.35073e-12	3.04349e-10	-0.720572	0.102764	7.79079	0.165906	0.000755094	0.0197269	0.0203657	0.0203657	-1.03956
ENST00000535754	ENSG00000102910	LONP2	2.97978e-05	0.00100333	-0.719575	0.172353	6.05651	0.157456	0.0288689	-0.0177667	0.0305423	0.0305423	-1.03813
ENST00000377797	ENSG00000070814	TCOF1	1.3981e-07	7.8201e-06	-0.719442	0.136633	7.14253	0.171886	0.0161005	0.0119004	0.0212368	0.0212368	-1.03794
ENST00000262097	ENSG00000104763	ASAH1	4.47358e-07	2.27759e-05	-0.716135	0.141876	8.72983	0.181035	0.00326377	0.0369937	0.0246323	0.0369937	-1.03316
ENST00000523483	ENSG00000137575	SDCBP	1.48501e-05	0.000539456	-0.715976	0.165318	5.56917	0.1866	0.01292	0.0339067	0.0417401	0.0417401	-1.03293
ENST00000449428	ENSG00000182534	MXRA7	5.67909e-05	0.00176317	-0.71523	0.177663	6.60142	0.200268	0.0143362	0.0487922	0.0243844	0.0487922	-1.03186
ENST00000361875	ENSG00000196428	TSC22D2	3.63314e-06	0.000153949	-0.713445	0.154047	5.62274	0.180443	0.00738327	0.0334653	0.0400779	0.0400779	-1.02928
ENST00000271636	ENSG00000143375	CGN	6.12926e-05	0.00188479	-0.713354	0.177992	5.40749	0.199703	0.0137705	0.049592	0.047665	0.049592	-1.02915
ENST00000315927	ENSG00000180667	YOD1	4.412e-05	0.00141253	-0.708988	0.173568	6.64256	0.195263	0.00940163	0.0508504	0.0240592	0.0508504	-1.02285
ENST00000274203	ENSG00000145555	MYO10	2.01469e-07	1.10106e-05	-0.707961	0.136199	6.26293	0.168442	0.00940113	0.0200456	0.0276993	0.0276993	-1.02137
ENST00000436066	ENSG00000166289	PLEKHF1	5.69201e-08	3.45052e-06	-0.707129	0.130269	6.12653	0.156875	0.0044528	0.0118912	0.0294873	0.0294873	-1.02017
ENST00000329047	ENSG00000184640	2009-09-01	1.88245e-06	8.41801e-05	-0.705422	0.148022	7.90015	0.166155	0.0233135	0.00466107	0.0205076	0.0205076	-1.01771
ENST00000427721	ENSG00000250644	AC068580.4	0.0013607	0.0271711	-0.703735	0.219721	5.20261	0.170402	0.0382496	-0.00452866	0.0583048	0.0583048	-1.01527
ENST00000378246	ENSG00000152457	DCLRE1C	0.000103667	0.00298451	-0.703083	0.181121	5.59924	0.161912	0.0248189	-0.000697141	0.0407906	0.0407906	-1.01433
ENST00000503026	ENSG00000150753	CCT5	2.59154e-10	2.38102e-08	-0.702471	0.111125	8.63651	0.143886	0.000835653	0.00254255	0.023862	0.023862	-1.01345
ENST00000335327	ENSG00000132970	WASF3	7.24862e-06	0.000284702	-0.701543	0.156376	6.08197	0.159545	0.0187603	0.00332188	0.0301467	0.0301467	-1.01211
ENST00000395074	ENSG00000110031	LPXN	2.0743e-11	2.30258e-09	-0.699701	0.104422	7.55434	0.158573	0.000902814	0.0209051	0.0203438	0.0209051	-1.00945
ENST00000380752	ENSG00000139514	SLC7A1	2.02681e-06	9.01588e-05	-0.699612	0.147264	8.29158	0.177022	0.000331515	0.0430418	0.0217353	0.0430418	-1.00933
ENST00000371472	ENSG00000165802	NSMF	0.00104616	0.0217696	-0.696783	0.212576	5.17399	0.176036	0.0302008	0.0133395	0.0601761	0.0601761	-1.00524
ENST00000567139	ENSG00000103249	CLCN7	0.000862271	0.0184778	-0.695732	0.208804	5.01934	0.17542	0.0150534	0.0282562	0.0721445	0.0721445	-1.00373
ENST00000394691	ENSG00000126822	PLEKHG3	0.000203462	0.00540488	-0.693998	0.186826	5.31641	0.151262	0.0179825	-0.00205462	0.0518253	0.0518253	-1.00123
ENST00000234179	ENSG00000115825	PRKD3	8.92316e-06	0.000343108	-0.693385	0.156106	7.90038	0.179142	0.0232967	0.0254416	0.020508	0.0254416	-1.00034
ENST00000329565	ENSG00000184602	SNN	2.16976e-09	1.70047e-07	-0.691089	0.115479	6.60553	0.15137	0.00231932	0.0150778	0.0243513	0.0243513	-0.99703
ENST00000261461	ENSG00000066027	PPP2R5A	7.10995e-05	0.00214515	-0.690976	0.173937	6.86636	0.188278	0.0038861	0.0566217	0.0225394	0.0566217	-0.996867
ENST00000269349	ENSG00000141543	EIF4A3	3.45058e-11	3.69698e-09	-0.689774	0.104102	8.17214	0.151257	0.000438012	0.017433	0.0212365	0.0212365	-0.995132
ENST00000265437	ENSG00000004866	ST7	6.14212e-09	4.47687e-07	-0.689742	0.118658	6.55911	0.149724	0.00342692	0.0126694	0.0247327	0.0247327	-0.995087
ENST00000298573	ENSG00000111266	DUSP16	2.79014e-06	0.000120876	-0.689603	0.147172	5.60475	0.172483	0.00269806	0.0400152	0.0406211	0.0406211	-0.994885
ENST00000626413	ENSG00000280962	DUSP16	2.79014e-06	0.000120876	-0.689603	0.147172	5.60475	0.172483	0.00269806	0.0400152	0.0406211	0.0406211	-0.994885
ENST00000253686	ENSG00000131368	MRPS25	1.85883e-09	1.47385e-07	-0.687465	0.114393	6.85015	0.157463	0.0024463	0.0237251	0.0226349	0.0237251	-0.991801
ENST00000502553	ENSG00000113407	TARS	5.05554e-10	4.4171e-08	-0.685993	0.110335	7.51703	0.145165	0.00397196	0.00852492	0.0203756	0.0203756	-0.989678
ENST00000389749	ENSG00000166166	TRMT61A	9.98898e-06	0.000378714	-0.685276	0.155131	5.77475	0.163741	0.0121019	0.0223952	0.0360291	0.0360291	-0.988643
ENST00000396408	ENSG00000196417	ZNF765	0.000219275	0.0057706	-0.684725	0.185276	5.18473	0.153491	0.00919211	0.0135978	0.0594622	0.0594622	-0.987849
ENST00000376215	ENSG00000148459	PDSS1	7.45767e-07	3.61994e-05	-0.683604	0.138128	6.0114	0.16191	0.00688013	0.0262433	0.0312787	0.0312787	-0.986231
ENST00000375992	ENSG00000196368	NUDT11	0.000111582	0.00318128	-0.680175	0.176032	5.29325	0.159016	0.00895072	0.0223553	0.053024	0.053024	-0.981284
ENST00000282007	ENSG00000123200	ZC3H13	2.28638e-08	1.49582e-06	-0.680055	0.121682	6.85916	0.156627	0.00703128	0.0215416	0.0225816	0.0225816	-0.981111
ENST00000358752	ENSG00000196371	FUT4	6.27009e-07	3.11266e-05	-0.679228	0.136317	5.9326	0.147369	0.00448083	0.0136654	0.0326839	0.0326839	-0.979919
ENST00000439220	ENSG00000103653	CSK	4.0311e-05	0.0013029	-0.676122	0.164679	6.89377	0.177102	0.00657522	0.0476632	0.0223829	0.0476632	-0.975437
ENST00000376573	ENSG00000150867	PIP4K2A	5.49004e-05	0.0017147	-0.669847	0.166062	7.37202	0.175473	0.000994011	0.054159	0.0205911	0.054159	-0.966384
ENST00000464228	ENSG00000119185	ITGB1BP1	1.12925e-07	6.42024e-06	-0.669837	0.126275	6.62385	0.14476	0.00768524	0.0116405	0.0242055	0.0242055	-0.96637
ENST00000562442	ENSG00000103429	BFAR	1.79475e-07	9.88837e-06	-0.668955	0.128166	6.30375	0.147598	0.00562923	0.0174013	0.027224	0.027224	-0.965097
ENST00000595531	ENSG00000135966	TGFBRAP1	1.90441e-10	1.80102e-08	-0.668857	0.10502	8.07037	0.137871	0.00115909	0.0105675	0.0208993	0.0208993	-0.964957
ENST00000357955	ENSG00000114738	MAPKAPK3	1.94649e-05	0.000685759	-0.666928	0.156155	6.38771	0.15292	0.0224483	0.00769435	0.0263203	0.0263203	-0.962173
ENST00000450114	ENSG00000166483	WEE1	8.39716e-07	4.0326e-05	-0.666456	0.135296	6.1011	0.15481	0.00675152	0.0258061	0.0298585	0.0298585	-0.961491
ENST00000218104	ENSG00000101986	ABCD1	8.15017e-07	3.92792e-05	-0.665633	0.134969	6.34284	0.157819	0.0032186	0.0332148	0.0267915	0.0332148	-0.960305
ENST00000466814	ENSG00000196428	TSC22D2	5.99659e-05	0.00185156	-0.664023	0.16547	5.77919	0.172917	0.00646938	0.0482915	0.035924	0.0482915	-0.957983
ENST00000302475	ENSG00000171444	MCC	3.46138e-09	2.60712e-07	-0.663118	0.112239	7.99429	0.147232	0.000514429	0.024681	0.0206981	0.024681	-0.956677
ENST00000235150	ENSG00000116514	RNF19B	8.35542e-05	0.00246846	-0.661564	0.168167	5.95427	0.173528	0.0233551	0.0332051	0.0322817	0.0332051	-0.954434
ENST00000542104	ENSG00000153179	RASSF3	1.39743e-10	1.35371e-08	-0.659923	0.102853	7.68232	0.142047	0.000849843	0.0197056	0.0203076	0.0203076	-0.952066
ENST00000216129	ENSG00000100304	TTLL12	2.60118e-09	2.00152e-07	-0.659435	0.110737	7.60187	0.145266	0.000817285	0.023708	0.0203172	0.023708	-0.951362
ENST00000558554	ENSG00000166411	IDH3A	5.38795e-05	0.00168593	-0.656956	0.162688	6.36985	0.168685	0.00728403	0.045651	0.0265047	0.045651	-0.947787
ENST00000378943	ENSG00000198814	GK	1.31968e-05	0.000485648	-0.655225	0.150391	5.91389	0.143101	0.0121933	0.0116517	0.0330415	0.0330415	-0.945289
ENST00000230122	ENSG00000112365	ZBTB24	1.36147e-08	9.36886e-07	-0.64957	0.114398	6.60197	0.139502	0.00179385	0.0203115	0.0243799	0.0243799	-0.937131
ENST00000407610	ENSG00000131732	ZCCHC9	0.00034168	0.00835242	-0.649285	0.181291	5.80895	0.168123	0.0304954	0.0251241	0.0352373	0.0352373	-0.93672
ENST00000575094	ENSG00000256594	AC010186.2	0.00145565	0.0287366	-0.647916	0.203531	5.03738	0.142293	0.0122709	0.0138062	0.0705786	0.0705786	-0.934745
ENST00000571688	ENSG00000189067	LITAF	0.000654434	0.0146831	-0.647466	0.189985	6.48597	0.148019	0.0468156	-0.0138643	0.0253727	0.0253727	-0.934095
ENST00000366794	ENSG00000143799	PARP1	8.97517e-08	5.26089e-06	-0.64729	0.121072	9.13534	0.129954	0.000168482	0.0117829	0.0291482	0.0291482	-0.933841
ENST00000380291	ENSG00000182287	AP1S2	8.58016e-05	0.00252934	-0.646431	0.164587	7.17594	0.165831	0.00122355	0.0529544	0.021119	0.0529544	-0.932603
ENST00000508451	ENSG00000150753	CCT5	2.26155e-05	0.000783607	-0.646413	0.152551	6.26572	0.15928	0.00309846	0.0434449	0.0276661	0.0434449	-0.932576
ENST00000008527	ENSG00000008405	CRY1	1.5281e-08	1.04412e-06	-0.645229	0.114031	6.68875	0.132877	0.00229664	0.0139532	0.0237094	0.0237094	-0.930868
ENST00000381774	ENSG00000103381	CPPED1	1.20277e-05	0.000448461	-0.642953	0.146891	5.7414	0.138067	0.00631322	0.0169694	0.0368405	0.0368405	-0.927584
ENST00000193403	ENSG00000072110	ACTN1	7.07737e-05	0.00213656	-0.64024	0.161121	9.00465	0.161619	0.000734893	0.0511848	0.0274658	0.0511848	-0.923671
ENST00000446987	ENSG00000136271	DDX56	7.68987e-05	0.00230095	-0.637726	0.161292	6.23732	0.133585	0.0240192	-0.00373481	0.0280108	0.0280108	-0.920043
ENST00000519100	ENSG00000070756	PABPC1	0.000133089	0.00372236	-0.635545	0.166344	5.89134	0.128398	0.021855	-0.00669681	0.0334854	0.0334854	-0.916897
ENST00000260197	ENSG00000137642	SORL1	4.11104e-06	0.000171728	-0.635184	0.137913	7.51905	0.14788	0.000839184	0.0372008	0.0203736	0.0372008	-0.916377
ENST00000404933	ENSG00000102172	SMS	8.16947e-06	0.000316645	-0.633855	0.142098	8.17891	0.149407	0.00124955	0.039134	0.0212617	0.039134	-0.914459
ENST00000396185	ENSG00000168036	CTNNB1	7.64382e-06	0.000298033	-0.632911	0.141435	8.29435	0.148743	0.00390232	0.0361054	0.0217483	0.0361054	-0.913097
ENST00000358726	ENSG00000214046	SMIM7	0.000739144	0.0161916	-0.632073	0.187301	5.17198	0.134633	0.00985169	0.0140484	0.0603119	0.0603119	-0.911888
ENST00000409409	ENSG00000172115	CYCS	3.1693e-05	0.00105768	-0.630787	0.151597	7.98384	0.153081	0.00303354	0.0429298	0.0206738	0.0429298	-0.910033
ENST00000276282	ENSG00000147324	MFHAS1	6.08773e-07	3.03548e-05	-0.629541	0.126201	6.47638	0.140538	0.00218285	0.0296704	0.0254606	0.0296704	-0.908236
ENST00000375114	ENSG00000125970	RALY	0.000779509	0.0169284	-0.628406	0.187027	5.19788	0.123078	0.0113516	0.000608061	0.0586069	0.0586069	-0.906598
ENST00000308482	ENSG00000124831	LRRFIP1	0.0010843	0.0224668	-0.626966	0.191868	5.23137	0.139171	0.017102	0.0142354	0.056525	0.056525	-0.90452
ENST00000355999	ENSG00000198648	STK39	1.0546e-07	6.05173e-06	-0.622164	0.117013	6.71651	0.120223	0.0038759	0.00735531	0.0235081	0.0235081	-0.897592
ENST00000504789	ENSG00000113387	SUB1	0.000139092	0.00387587	-0.621319	0.163085	5.85034	0.146333	0.0188628	0.02318	0.034331	0.034331	-0.896374
ENST00000268711	ENSG00000141026	MED9	1.12381e-06	5.25893e-05	-0.621112	0.127575	6.12207	0.13614	0.00299912	0.0272369	0.0295514	0.0295514	-0.896075
ENST00000372360	ENSG00000138326	RPS24	1.35475e-08	9.34155e-07	-0.62083	0.10932	8.49351	0.126942	0.00105244	0.0185701	0.0228493	0.0228493	-0.895668
ENST00000533161	ENSG00000140988	RPS2	2.36226e-06	0.00010407	-0.620727	0.131519	6.35416	0.125341	0.00792443	0.0098728	0.0266701	0.0266701	-0.895519
ENST00000396014	ENSG00000197006	METTL9	7.56164e-06	0.000295795	-0.619585	0.138386	8.14451	0.142511	0.000750976	0.0375502	0.0211371	0.0375502	-0.893871
ENST00000489459	ENSG00000196262	PPIA	2.15435e-05	0.000752333	-0.617235	0.145291	6.50168	0.12719	0.0169881	0.00440774	0.0252309	0.0252309	-0.890481
ENST00000344537	ENSG00000047579	DTNBP1	8.29817e-07	3.99191e-05	-0.616206	0.125036	6.42938	0.134132	0.00536304	0.0245542	0.0259051	0.0259051	-0.888997
ENST00000330317	ENSG00000160193	WDR4	0.000158989	0.0043568	-0.615765	0.163048	5.95937	0.153907	0.0104991	0.0426701	0.0321888	0.0426701	-0.888361
ENST00000220509	ENSG00000104142	VPS18	8.61887e-08	5.07046e-06	-0.615418	0.114953	6.95742	0.130864	0.00144932	0.0249789	0.0220433	0.0249789	-0.88786
ENST00000511348	ENSG00000164032	H2AFZ	0.00086505	0.0185247	-0.613719	0.184239	5.27635	0.121688	0.0139519	0.00246741	0.0539365	0.0539365	-0.885409
ENST00000344517	ENSG00000135776	ABCB10	4.46487e-06	0.000184572	-0.613295	0.13366	6.92742	0.138092	0.00145766	0.0342722	0.0221993	0.0342722	-0.884798
ENST00000242848	ENSG00000123200	ZC3H13	2.23481e-07	1.21449e-05	-0.611544	0.118089	8.27617	0.130759	0.000681771	0.0272083	0.0216645	0.0272083	-0.882271
ENST00000231498	ENSG00000113569	NUP155	6.59808e-08	3.96078e-06	-0.610213	0.112965	6.94311	0.113732	0.00340546	0.00516172	0.0221168	0.0221168	-0.880351
ENST00000255764	ENSG00000133398	MED10	5.43047e-07	2.73393e-05	-0.608713	0.121489	6.32149	0.116011	0.00249401	0.00934154	0.0270251	0.0270251	-0.878187
ENST00000360961	ENSG00000060762	MPC1	1.06737e-05	0.000402868	-0.607149	0.137893	5.94269	0.135003	0.00553376	0.0290936	0.032495	0.032495	-0.87593
ENST00000517671	ENSG00000181163	NPM1	0.000391931	0.00943274	-0.606494	0.171062	10.2785	0.117499	7.72128e-05	0.014393	0.0584474	0.0584474	-0.874986
ENST00000274255	ENSG00000145604	SKP2	3.35324e-06	0.000142894	-0.605663	0.130309	6.47464	0.125501	0.00848415	0.0156579	0.0254766	0.0254766	-0.873786
ENST00000602300	ENSG00000152795	HNRNPDL	2.00963e-08	1.34235e-06	-0.604889	0.107801	8.10788	0.124462	0.000654759	0.0225873	0.0210144	0.0225873	-0.87267
ENST00000481006	ENSG00000171863	RPS7	3.18217e-05	0.00106093	-0.604809	0.145386	5.74559	0.115752	0.00553782	0.0075743	0.0367364	0.0367364	-0.872555
ENST00000620041	ENSG00000167996	FTH1	0.000207539	0.00549378	-0.604594	0.162978	10.1411	0.119573	0.000114373	0.0175429	0.0530095	0.0530095	-0.872244
ENST00000483871	ENSG00000124193	SRSF6	1.81328e-06	8.13286e-05	-0.601428	0.126001	7.25302	0.130564	0.00258207	0.0291705	0.0208784	0.0291705	-0.867676
ENST00000359530	ENSG00000047249	ATP6V1H	6.39334e-08	3.84811e-06	-0.599526	0.110871	7.46308	0.113255	0.00414597	0.00817369	0.0204387	0.0204387	-0.864933
ENST00000409334	ENSG00000198612	COPS8	1.56815e-05	0.000566014	-0.596971	0.138223	6.14514	0.124887	0.00898776	0.017922	0.0292235	0.0292235	-0.861246
ENST00000282276	ENSG00000247626	MARS2	9.61783e-08	5.58535e-06	-0.59635	0.111806	6.73833	0.1077	0.0016462	0.00545941	0.0233548	0.0233548	-0.86035
ENST00000524732	ENSG00000234964	FABP5P7	2.1095e-05	0.000738574	-0.594933	0.139886	6.915	0.134673	0.00313104	0.0360054	0.022266	0.0360054	-0.858307
ENST00000220325	ENSG00000103966	EHD4	4.53426e-08	2.81419e-06	-0.594882	0.10878	7.03352	0.115062	0.00198647	0.014291	0.0216797	0.0216797	-0.858232
ENST00000372692	ENSG00000119335	SET	0.000110104	0.00314842	-0.592534	0.153221	7.59757	0.140559	0.00701082	0.0399427	0.0203189	0.0399427	-0.854845
ENST00000311601	ENSG00000174705	SH3PXD2B	2.618e-05	0.000893961	-0.59176	0.140748	7.37301	0.134011	0.000997959	0.0386223	0.0205891	0.0386223	-0.853728
ENST00000559169	ENSG00000140471	LINS1	0.000117623	0.00332829	-0.590904	0.153441	5.88132	0.140123	0.00680038	0.0402876	0.0336875	0.0402876	-0.852493
ENST00000344417	ENSG00000146576	C7orf26	4.72063e-05	0.00149999	-0.590026	0.145004	5.86691	0.12353	0.00806902	0.0200052	0.0339831	0.0339831	-0.851228
ENST00000316519	ENSG00000081760	AACS	3.61555e-05	0.00118557	-0.589759	0.142772	5.84695	0.13432	0.00570403	0.0350638	0.0344031	0.0350638	-0.850841
ENST00000261401	ENSG00000110880	CORO1C	7.54934e-07	3.65657e-05	-0.589696	0.119211	9.06122	0.119157	0.000257202	0.0228456	0.0281651	0.0281651	-0.850751
ENST00000300146	ENSG00000166889	PATL1	1.14168e-08	8.01106e-07	-0.588986	0.103182	7.44132	0.106808	0.000823317	0.00815108	0.0204698	0.0204698	-0.849727
ENST00000337714	ENSG00000121057	AKAP1	5.51427e-06	0.000223196	-0.58836	0.129475	6.77628	0.118207	0.0104291	0.0120903	0.0230983	0.0230983	-0.848823
ENST00000300584	ENSG00000167202	TBC1D2B	8.30063e-07	3.99191e-05	-0.588257	0.119366	6.58755	0.109472	0.00399967	0.00836866	0.0244969	0.0244969	-0.848674
ENST00000249806	ENSG00000128973	CLN6	4.93968e-08	3.03797e-06	-0.5881	0.10784	7.0109	0.103458	0.00147574	0.00393857	0.021783	0.021783	-0.848448
ENST00000353383	ENSG00000108557	RAI1	1.2351e-08	8.59533e-07	-0.586061	0.102912	7.70982	0.116064	0.000866929	0.0200514	0.0203146	0.0203146	-0.845507
ENST00000475411	ENSG00000172785	CBWD1	0.000139919	0.00389249	-0.585664	0.153786	5.57392	0.13102	0.00571306	0.0328091	0.0415871	0.0415871	-0.844934
ENST00000543633	ENSG00000139719	VPS33A	1.88551e-05	0.000666008	-0.585278	0.13681	6.16838	0.11067	0.00853055	0.00640112	0.0289035	0.0289035	-0.844377
ENST00000474550	ENSG00000170485	NPAS2	6.42254e-05	0.00196338	-0.585065	0.146386	5.97231	0.134536	0.00411681	0.038741	0.0319561	0.038741	-0.84407
ENST00000628983	ENSG00000281766	RYBP	1.11296e-05	0.000417979	-0.583417	0.132776	8.33646	0.127472	0.000375491	0.0348837	0.0219527	0.0348837	-0.841692
ENST00000440940	ENSG00000124275	MTRR	2.26313e-05	0.000783607	-0.580594	0.137023	6.92301	0.11857	0.0153276	0.0106407	0.0222228	0.0222228	-0.83762
ENST00000244815	ENSG00000124831	LRRFIP1	4.80257e-05	0.00152317	-0.580207	0.142731	8.04516	0.131107	0.00232642	0.038418	0.0208279	0.038418	-0.837062
ENST00000300456	ENSG00000167114	SLC27A4	7.34106e-07	3.56589e-05	-0.578716	0.116862	6.59151	0.114796	0.00284904	0.0194426	0.0244646	0.0244646	-0.834911
ENST00000264993	ENSG00000091527	CDV3	5.94812e-08	3.59612e-06	-0.577476	0.106538	7.86973	0.111311	0.00224119	0.0164622	0.0204597	0.0204597	-0.833121
ENST00000229769	ENSG00000112039	FANCE	0.000260471	0.00666313	-0.57703	0.158015	5.50547	0.129599	0.00603675	0.0341746	0.0439009	0.0439009	-0.832478
ENST00000234454	ENSG00000116096	SPR	8.4061e-05	0.00248127	-0.576991	0.146723	7.03007	0.132024	0.00158764	0.0414676	0.0216952	0.0414676	-0.832421
ENST00000353234	ENSG00000165138	ANKS6	2.42584e-05	0.000833813	-0.575297	0.136275	5.97745	0.10055	0.00527691	0.00170877	0.0318648	0.0318648	-0.829977
ENST00000405392	ENSG00000138031	ADCY3	0.000978927	0.0206242	-0.573911	0.174096	6.64556	0.116522	0.0365831	-0.0104317	0.024036	0.024036	-0.827978
ENST00000541166	ENSG00000136045	PWP1	4.27628e-08	2.66385e-06	-0.573884	0.104742	7.5259	0.105959	0.00157442	0.0122639	0.0203672	0.0203672	-0.827939
ENST00000361924	ENSG00000144674	GOLGA4	1.12227e-06	5.25535e-05	-0.57349	0.117787	7.57048	0.100245	0.00741434	-9.15287e-05	0.020333	0.020333	-0.82737
ENST00000216264	ENSG00000100422	CERK	3.71787e-08	2.35059e-06	-0.572315	0.103986	8.16051	0.0978739	0.000432356	0.00457239	0.0211939	0.0211939	-0.825675
ENST00000217162	ENSG00000101190	TCFL5	4.21277e-06	0.000175006	-0.570835	0.124078	6.37835	0.118598	0.00437449	0.0253717	0.0264164	0.0264164	-0.823541
ENST00000368778	ENSG00000188690	UROS	0.000831841	0.0179098	-0.568413	0.170083	5.39239	0.108372	0.00955866	0.00917814	0.0482977	0.0482977	-0.820046
ENST00000375213	ENSG00000091436	MAP3K20	0.000670573	0.0149605	-0.567663	0.166894	5.61627	0.111437	0.0154356	0.00716042	0.0402717	0.0402717	-0.818964
ENST00000367294	ENSG00000146476	ARMT1	5.47938e-08	3.33656e-06	-0.567387	0.104395	7.29879	0.110603	0.00104063	0.0206871	0.020756	0.020756	-0.818566
ENST00000374050	ENSG00000136888	ATP6V1G1	3.65772e-08	2.31906e-06	-0.563779	0.102382	7.71264	0.0945538	0.000648426	0.00371564	0.0203156	0.0203156	-0.81336
ENST00000367454	ENSG00000116750	UCHL5	3.89047e-05	0.00126227	-0.556522	0.135279	6.66568	0.102243	0.0127187	0.00332596	0.023882	0.023882	-0.802891
ENST00000307216	ENSG00000103978	TMEM87A	0.000378942	0.00916403	-0.555471	0.15628	5.54623	0.121354	0.00635293	0.0323774	0.042494	0.042494	-0.801375
ENST00000396926	ENSG00000070718	AP3M2	0.000160844	0.00440226	-0.554449	0.146925	6.83969	0.124839	0.00777512	0.0353985	0.0226977	0.0353985	-0.799901
ENST00000320270	ENSG00000179041	RRS1	1.18121e-06	5.48957e-05	-0.554029	0.114027	6.66983	0.0999549	0.00215367	0.0121442	0.0238506	0.0238506	-0.799295
ENST00000297440	ENSG00000164818	DNAAF5	9.76326e-08	5.65043e-06	-0.553046	0.10374	7.48438	0.0966045	0.00111267	0.00963913	0.0204114	0.0204114	-0.797877
ENST00000507110	ENSG00000112996	MRPS30	1.72915e-07	9.58077e-06	-0.552542	0.105723	7.57354	0.0922049	0.00202349	0.00378143	0.0203312	0.0203312	-0.797149
ENST00000506799	ENSG00000123213	NLN	0.000136646	0.00381241	-0.552392	0.144827	5.9125	0.119121	0.00888098	0.0283816	0.0330685	0.0330685	-0.796933
ENST00000374232	ENSG00000148158	SNX30	3.14476e-05	0.00105104	-0.551912	0.132584	7.35885	0.117165	0.000898788	0.0342585	0.0206179	0.0342585	-0.796241
ENST00000166345	ENSG00000071539	TRIP13	1.08905e-06	5.12461e-05	-0.551579	0.113148	6.71937	0.0975765	0.00211736	0.0103088	0.0234878	0.0234878	-0.79576
ENST00000272418	ENSG00000144029	MRPS5	9.54657e-06	0.000364874	-0.549803	0.124188	7.78134	0.112806	0.000709606	0.0301356	0.0203574	0.0301356	-0.793198
ENST00000248975	ENSG00000128245	YWHAH	1.76253e-05	0.00062616	-0.54979	0.128066	8.06392	0.114478	0.00150857	0.0312931	0.0208806	0.0312931	-0.793179
ENST00000242776	ENSG00000123136	DDX39A	0.000141417	0.00392771	-0.549389	0.14436	7.60238	0.121962	0.00154606	0.0401338	0.020317	0.0401338	-0.7926
ENST00000371208	ENSG00000134709	HOOK1	1.07553e-05	0.000405497	-0.54889	0.124708	6.23358	0.110234	0.00304698	0.0251329	0.0280572	0.0280572	-0.79188
ENST00000376588	ENSG00000135069	PSAT1	1.01169e-07	5.84507e-06	-0.5485	0.103012	7.90069	0.104149	0.000630133	0.0205929	0.0205086	0.0205929	-0.791317
ENST00000388968	ENSG00000144381	HSPD1	0.000241699	0.00625617	-0.546251	0.148806	9.8193	0.109387	0.00155103	0.0266038	0.0427353	0.0427353	-0.788073
ENST00000304332	ENSG00000113648	H2AFY	6.16109e-07	3.06529e-05	-0.545207	0.109345	7.36389	0.0908716	0.00330528	0.00362822	0.0206075	0.0206075	-0.786566
ENST00000416699	ENSG00000189306	RRP7A	0.00192114	0.0360948	-0.544165	0.175415	5.40492	0.0910658	0.0137689	-0.00623052	0.0477718	0.0477718	-0.785063
ENST00000263026	ENSG00000103319	EEF2K	1.0846e-06	5.1072e-05	-0.541931	0.111151	6.81314	0.0898202	0.00184776	0.0050461	0.0228613	0.0228613	-0.78184
ENST00000366957	ENSG00000143499	SMYD2	5.76498e-07	2.88398e-05	-0.54169	0.108361	6.96985	0.0988031	0.00150357	0.0159572	0.0219808	0.0219808	-0.781493
ENST00000217195	ENSG00000101220	C20orf27	9.99979e-05	0.00288872	-0.541196	0.139104	6.26348	0.109636	0.0110068	0.0192713	0.0276928	0.0276928	-0.780781
ENST00000324593	ENSG00000119725	ZNF410	1.71839e-05	0.000612103	-0.540752	0.125796	6.62291	0.103242	0.00743615	0.0155423	0.0242129	0.0242129	-0.78014
ENST00000392008	ENSG00000198612	COPS8	1.76709e-07	9.76775e-06	-0.540124	0.103426	8.0529	0.0938798	0.000544709	0.0117371	0.0208493	0.0208493	-0.779234
ENST00000251993	ENSG00000100364	KIAA0930	1.23008e-05	0.000456649	-0.539933	0.123493	8.10088	0.0977534	0.00950877	0.00736102	0.0209921	0.0209921	-0.778958
ENST00000396123	ENSG00000196208	GREB1	5.21312e-05	0.00163898	-0.539422	0.133327	8.41279	0.113609	0.000320617	0.0352315	0.0223615	0.0352315	-0.778221
ENST00000269143	ENSG00000141385	AFG3L2	1.77246e-07	9.78146e-06	-0.538669	0.103159	7.95123	0.091016	0.000680446	0.00878339	0.0206031	0.0206031	-0.777135
ENST00000266771	ENSG00000139370	SLC15A4	2.83201e-06	0.000122454	-0.538408	0.11498	6.85561	0.0945835	0.0038381	0.00988157	0.0226025	0.0226025	-0.776758
ENST00000277632	ENSG00000148481	MINDY3	7.7237e-07	3.73568e-05	-0.537168	0.10869	7.0377	0.0906255	0.00196581	0.00758087	0.021661	0.021661	-0.774969
ENST00000258062	ENSG00000135597	REPS1	0.000643417	0.0144647	-0.535383	0.156883	5.99668	0.0925991	0.0176953	-0.00520792	0.0315294	0.0315294	-0.772394
ENST00000254654	ENSG00000132323	ILKAP	5.64977e-07	2.8338e-05	-0.534615	0.106863	7.12046	0.089699	0.00152004	0.00785782	0.0213192	0.0213192	-0.771286
ENST00000320574	ENSG00000177084	POLE	3.18639e-06	0.000136471	-0.533109	0.11444	7.42927	0.103653	0.000865694	0.0253273	0.0204885	0.0253273	-0.769114
ENST00000375370	ENSG00000198176	TFDP1	2.34844e-07	1.27013e-05	-0.533019	0.10311	7.70711	0.0899865	0.000949824	0.00933116	0.0203137	0.0203137	-0.768984
ENST00000360876	ENSG00000106263	EIF3B	2.69876e-06	0.000117217	-0.532244	0.113424	8.58947	0.100072	0.00222295	0.0200996	0.0235072	0.0235072	-0.767865
ENST00000264126	ENSG00000121957	GPSM2	5.7971e-06	0.000233654	-0.532032	0.117352	6.76351	0.102577	0.00435954	0.0209606	0.0231833	0.0231833	-0.76756
ENST00000569715	ENSG00000179889	PDXDC1	3.00469e-06	0.000129179	-0.531058	0.113705	7.50814	0.0987803	0.00547294	0.0157631	0.0203846	0.0203846	-0.766154
ENST00000305786	ENSG00000172115	CYCS	2.23087e-06	9.84739e-05	-0.530927	0.112216	8.7585	0.0893052	0.000297496	0.00993079	0.0248873	0.0248873	-0.765965
ENST00000274000	ENSG00000138660	AP1AR	1.42619e-05	0.00052032	-0.53084	0.122319	6.59817	0.093655	0.00551345	0.00982037	0.0244106	0.0244106	-0.76584
ENST00000316881	ENSG00000121060	TRIM25	3.13762e-07	1.65208e-05	-0.530249	0.103666	7.44632	0.0840001	0.00103082	0.00324785	0.0204624	0.0204624	-0.764988
ENST00000581874	ENSG00000189159	JPT1	6.8506e-05	0.00207272	-0.529726	0.13305	6.17178	0.110521	0.00596984	0.0294346	0.0288575	0.0294346	-0.764233
ENST00000514825	ENSG00000170606	HSPA4	1.63523e-06	7.42631e-05	-0.529433	0.110437	7.04556	0.0973999	0.00276656	0.0174337	0.0216263	0.0216263	-0.763809
ENST00000219097	ENSG00000091651	ORC6	4.1495e-05	0.00133607	-0.529143	0.129091	6.41416	0.0886078	0.00727461	0.00277054	0.0260543	0.0260543	-0.763391
ENST00000308159	ENSG00000102900	NUP93	3.84015e-07	1.98798e-05	-0.528848	0.104171	7.68545	0.0972202	0.00139512	0.0188018	0.0203082	0.0203082	-0.762965
ENST00000258455	ENSG00000135972	MRPS9	3.4209e-07	1.78872e-05	-0.528645	0.103683	7.44829	0.093261	0.00104101	0.0146083	0.0204595	0.0204595	-0.762673
ENST00000497741	ENSG00000136238	RAC1	0.000102878	0.00296434	-0.528354	0.136044	6.42576	0.0882956	0.0110757	-0.00111689	0.0259403	0.0259403	-0.762254
ENST00000355943	ENSG00000164209	SLC25A46	7.63864e-06	0.000298033	-0.528347	0.118064	6.82537	0.0921028	0.00509325	0.00930989	0.0227852	0.0227852	-0.762243
ENST00000425046	ENSG00000170364	SETMAR	0.000220024	0.00578582	-0.526616	0.142527	5.92083	0.0919351	0.00772037	0.00709588	0.0329077	0.0329077	-0.759745
ENST00000315286	ENSG00000180329	CCDC43	3.47964e-06	0.000147908	-0.526317	0.113424	7.0991	0.1012	0.00203849	0.0236915	0.0214025	0.0236915	-0.759314
ENST00000295133	ENSG00000163013	FBXO41	0.000156527	0.0043015	-0.526074	0.139156	6.39803	0.0979778	0.0125131	0.0095429	0.0262154	0.0262154	-0.758965
ENST00000392521	ENSG00000122966	CIT	5.48772e-07	2.75865e-05	-0.52586	0.104995	8.15786	0.0861754	0.000863575	0.00749813	0.0211844	0.0211844	-0.758655
ENST00000239940	ENSG00000070087	PFN2	6.81245e-06	0.000269446	-0.523875	0.11643	7.55752	0.0887869	0.00677058	0.00533248	0.0203415	0.0203415	-0.755791
ENST00000397625	ENSG00000070495	JMJD6	6.19095e-06	0.000247612	-0.521316	0.115342	6.71306	0.100455	0.00261824	0.0239891	0.0235328	0.0239891	-0.7521
ENST00000299204	ENSG00000166170	BAG5	0.000143594	0.00397839	-0.521008	0.137039	7.05211	0.0970552	0.0159617	0.00678609	0.0215977	0.0215977	-0.751656
ENST00000314103	ENSG00000159259	CHAF1B	7.29545e-06	0.000286375	-0.520505	0.116058	6.53611	0.0870968	0.00201027	0.00929402	0.0249285	0.0249285	-0.75093
ENST00000258383	ENSG00000135900	MRPL44	1.60196e-05	0.000576374	-0.519848	0.120497	7.60026	0.102103	0.000836991	0.0282023	0.0203178	0.0282023	-0.749981
ENST00000399654	ENSG00000002822	MAD1L1	3.14235e-05	0.00105075	-0.519089	0.124694	6.966	0.103642	0.00335854	0.0277388	0.022	0.0277388	-0.748887
ENST00000407193	ENSG00000164587	RPS14	9.81186e-05	0.00284451	-0.515829	0.132427	6.70883	0.106086	0.00663941	0.0284344	0.0235631	0.0284344	-0.744184
ENST00000377036	ENSG00000160049	DFFA	1.18055e-06	5.48957e-05	-0.515828	0.106162	7.28643	0.0931853	0.00175318	0.0182702	0.0207876	0.0207876	-0.744182
ENST00000236980	ENSG00000118246	FASTKD2	1.83569e-06	8.22634e-05	-0.51427	0.107797	7.44358	0.0951731	0.002774	0.0201035	0.0204664	0.0204664	-0.741934
ENST00000359060	ENSG00000160075	SSU72	2.15885e-06	9.56062e-05	-0.512439	0.108156	6.94826	0.0931422	0.00130536	0.0198294	0.0220901	0.0220901	-0.739293
ENST00000497547	ENSG00000160214	RRP1	7.01104e-06	0.000276654	-0.511716	0.113883	6.72945	0.0922553	0.00252189	0.0178249	0.0234167	0.0234167	-0.73825
ENST00000278590	ENSG00000149289	ZC3H12C	5.39263e-05	0.00168629	-0.510699	0.126476	6.86327	0.10194	0.00190553	0.0300867	0.0225574	0.0300867	-0.736783
ENST00000366971	ENSG00000162769	FLVCR1	8.98724e-05	0.00263785	-0.51051	0.130351	6.06648	0.0895241	0.00359701	0.0139743	0.0303858	0.0303858	-0.73651
ENST00000262300	ENSG00000127564	PKMYT1	0.000273144	0.00695316	-0.510465	0.140256	6.24035	0.097397	0.0113701	0.0154015	0.0279734	0.0279734	-0.736445
ENST00000223029	ENSG00000106305	AIMP2	1.25574e-05	0.000465152	-0.51029	0.116833	7.01648	0.0977989	0.00158289	0.0257171	0.0217572	0.0257171	-0.736192
ENST00000220597	ENSG00000076641	PAG1	0.000170973	0.00464197	-0.505764	0.134567	7.65984	0.104128	0.000638636	0.0355781	0.0203058	0.0355781	-0.729663
ENST00000409374	ENSG00000115364	MRPL19	0.000544066	0.012518	-0.504078	0.145769	6.328	0.0925051	0.0155438	0.00768066	0.0269532	0.0269532	-0.72723
ENST00000296417	ENSG00000164032	H2AFZ	0.000238721	0.00619093	-0.503669	0.137088	9.60491	0.0970733	0.000130533	0.0285609	0.0374555	0.0374555	-0.72664
ENST00000440886	ENSG00000171517	LPAR3	6.79309e-05	0.00205808	-0.502932	0.126256	6.3675	0.0995954	0.00361504	0.0282662	0.0265293	0.0282662	-0.725576
ENST00000263997	ENSG00000103061	SLC7A6OS	0.000179937	0.00485035	-0.500905	0.13373	6.32975	0.101956	0.00883366	0.0264792	0.026934	0.026934	-0.722653
ENST00000558535	ENSG00000166411	IDH3A	1.69611e-06	7.67192e-05	-0.496855	0.103801	7.55223	0.0717451	0.00120387	0.000210327	0.0203453	0.0203453	-0.71681
ENST00000452185	ENSG00000106628	POLD2	5.82453e-05	0.0018075	-0.495166	0.123182	6.91515	0.0834929	0.00808223	0.00759617	0.0222652	0.0222652	-0.714374
ENST00000436644	ENSG00000172239	PAIP1	4.6366e-06	0.000191321	-0.493443	0.107725	7.78746	0.0894611	0.000935375	0.0222739	0.0203627	0.0222739	-0.711887
ENST00000589157	ENSG00000161091	MFSD12	0.000181002	0.00487711	-0.493423	0.131785	6.03908	0.08571	0.00391314	0.0149265	0.0308213	0.0308213	-0.711858
ENST00000381007	ENSG00000197860	SGTB	2.25288e-05	0.000781501	-0.492824	0.11628	6.55445	0.0811291	0.00227028	0.011422	0.024772	0.024772	-0.710994
ENST00000296511	ENSG00000164111	ANXA5	0.000297011	0.00744871	-0.491236	0.13578	9.55741	0.0846843	0.000444605	0.0179161	0.0364276	0.0364276	-0.708704
ENST00000302692	ENSG00000171612	SLC25A33	3.09778e-06	0.000132928	-0.491066	0.105283	7.26796	0.0835993	0.00133239	0.0158181	0.0208368	0.0208368	-0.708458
ENST00000296161	ENSG00000163840	DTX3L	4.23994e-06	0.000175918	-0.490417	0.10663	7.05764	0.0854022	0.00116581	0.0183005	0.0215739	0.0215739	-0.707522
ENST00000263881	ENSG00000011566	MAP4K3	0.000160751	0.00440226	-0.489776	0.129782	6.79672	0.0862073	0.0107212	0.00989368	0.0229654	0.0229654	-0.706597
ENST00000302979	ENSG00000186184	POLR1D	0.00032522	0.00803124	-0.489259	0.136119	6.07811	0.0906053	0.00685118	0.0190636	0.0302058	0.0302058	-0.705851
ENST00000459929	ENSG00000116679	IVNS1ABP	1.46913e-05	0.000533973	-0.487539	0.112511	7.90326	0.0896133	0.00190008	0.0234173	0.0205129	0.0234173	-0.70337
ENST00000336767	ENSG00000113460	BRIX1	1.18016e-05	0.000440287	-0.486109	0.110953	6.86947	0.0743014	0.0020997	0.00581807	0.0225213	0.0225213	-0.701306
ENST00000367619	ENSG00000057252	SOAT1	3.67492e-06	0.000155234	-0.485739	0.104935	8.14516	0.0841297	0.000883151	0.0186208	0.0211394	0.0211394	-0.700772
ENST00000407426	ENSG00000163811	WDR43	2.65615e-06	0.00011544	-0.484775	0.103237	7.97701	0.0795126	0.000657326	0.0137717	0.0206583	0.0206583	-0.699382
ENST00000494484	ENSG00000196262	PPIA	7.81496e-05	0.00233425	-0.481961	0.122015	6.3824	0.0752679	0.00340084	0.00698289	0.0263746	0.0263746	-0.695323
ENST00000343550	ENSG00000105698	USF2	0.000269742	0.00687432	-0.479408	0.131606	6.66675	0.0904946	0.0107665	0.0181999	0.0238738	0.0238738	-0.691639
ENST00000549260	ENSG00000171310	CHST11	0.000454237	0.010728	-0.47887	0.136571	7.40592	0.0810699	0.0167756	0.00136706	0.0205276	0.0205276	-0.690863
ENST00000397011	ENSG00000106263	EIF3B	2.1838e-05	0.000761048	-0.478866	0.112801	8.44901	0.0712518	0.00287509	0.00381441	0.0225732	0.0225732	-0.690857
ENST00000480769	ENSG00000116679	IVNS1ABP	8.1414e-05	0.00241683	-0.475974	0.120799	7.40538	0.0897445	0.00220918	0.0269758	0.0205285	0.0269758	-0.686684
ENST00000239882	ENSG00000120690	ELF1	1.83306e-05	0.000649855	-0.475187	0.110913	7.02862	0.0753792	0.00290174	0.00977311	0.0217018	0.0217018	-0.685549
ENST00000376962	ENSG00000107372	ZFAND5	8.22321e-05	0.00243471	-0.475186	0.120673	7.68966	0.0894783	0.00560089	0.0235231	0.020309	0.0235231	-0.685549
ENST00000296048	ENSG00000163754	GYG1	7.05947e-06	0.000278079	-0.474973	0.10574	7.42566	0.0793193	0.00186767	0.0154718	0.0204943	0.0204943	-0.685241
ENST00000374257	ENSG00000119314	PTBP3	2.16647e-05	0.000756178	-0.474779	0.111792	7.68086	0.0858285	0.000677998	0.0243167	0.0203074	0.0243167	-0.684962
ENST00000324953	ENSG00000135535	CD164	0.00124808	0.0253178	-0.474587	0.147038	7.04397	0.0802405	0.0216068	-0.00307047	0.0216333	0.0216333	-0.684684
ENST00000244007	ENSG00000124181	PLCG1	6.21082e-06	0.000248114	-0.472186	0.104487	7.37344	0.0748083	0.00124688	0.0117096	0.0205883	0.0205883	-0.68122
ENST00000264254	ENSG00000115539	PDCL3	9.07377e-06	0.000348306	-0.470509	0.106015	7.11336	0.077801	0.00113176	0.0158432	0.0213465	0.0213465	-0.678801
ENST00000230859	ENSG00000112941	PAPD7	8.22057e-05	0.00243471	-0.469376	0.119195	6.39831	0.0777605	0.00220238	0.0150803	0.0262126	0.0262126	-0.677166
ENST00000335007	ENSG00000186298	PPP1CC	2.85895e-05	0.000966972	-0.469095	0.112105	8.74016	0.0765171	0.000412034	0.0155077	0.0247231	0.0247231	-0.676761
ENST00000394818	ENSG00000149503	INCENP	0.000601576	0.0136327	-0.466458	0.135958	6.66814	0.0665062	0.0131057	-0.0080428	0.0238633	0.0238633	-0.672956
ENST00000367879	ENSG00000143179	UCK2	4.12992e-05	0.0013304	-0.466225	0.113711	6.74926	0.0711557	0.00258067	0.00797904	0.0232797	0.0232797	-0.67262
ENST00000303577	ENSG00000169564	PCBP1	0.000125128	0.00351861	-0.465485	0.121351	9.14692	0.0731984	0.000143353	0.0130293	0.0293088	0.0293088	-0.671553
ENST00000409276	ENSG00000115875	SRSF7	8.23061e-06	0.00031865	-0.463379	0.103918	7.66813	0.0723872	0.00129171	0.0115867	0.0203061	0.0203061	-0.668514
ENST00000397061	ENSG00000213965	NUDT19	1.5214e-05	0.000550902	-0.463361	0.107121	7.02256	0.0653714	0.00122073	0.0034782	0.0217293	0.0217293	-0.668488
ENST00000264956	ENSG00000072840	EVC	4.01594e-05	0.00129862	-0.463218	0.1128	6.70737	0.0769872	0.00187391	0.0164207	0.0235736	0.0235736	-0.668283
ENST00000381077	ENSG00000130021	PUDP	0.000470265	0.0110528	-0.462608	0.132282	6.01718	0.0766902	0.00381501	0.0143215	0.0311818	0.0311818	-0.667402
ENST00000558190	ENSG00000066427	ATXN3	5.51507e-05	0.00172173	-0.461889	0.114537	6.64012	0.0655968	0.00215941	0.00325647	0.0240781	0.0240781	-0.666364
ENST00000418342	ENSG00000169641	LUZP1	7.36026e-06	0.000288752	-0.460495	0.10272	7.8548	0.0700522	0.000664396	0.010378	0.0204385	0.0204385	-0.664353
ENST00000373449	ENSG00000004455	AK2	1.05234e-05	0.000397418	-0.460415	0.104494	8.09725	0.0701445	0.000857382	0.0103172	0.0209807	0.0209807	-0.664238
ENST00000356770	ENSG00000163939	PBRM1	9.66923e-06	0.000368656	-0.46007	0.103984	7.48336	0.0725906	0.00121266	0.0129216	0.0204126	0.0204126	-0.66374
ENST00000265631	ENSG00000004864	SLC25A13	1.32658e-05	0.000487923	-0.459809	0.105565	8.30171	0.0769211	0.000505223	0.0187613	0.0217829	0.0217829	-0.663364
ENST00000366899	ENSG00000143507	DUSP10	0.000176788	0.00478069	-0.459731	0.122593	6.36898	0.0818825	0.00354414	0.0215347	0.0265138	0.0265138	-0.663251
ENST00000542817	ENSG00000169246	NPIPB3	0.000466004	0.0109679	-0.458821	0.131108	6.67722	0.0809007	0.0105834	0.0136286	0.023795	0.023795	-0.661938
ENST00000497056	ENSG00000114209	PDCD10	0.000183374	0.0049281	-0.458632	0.1226	6.57867	0.0786114	0.00549165	0.0161073	0.0245698	0.0245698	-0.661665
ENST00000257700	ENSG00000135249	RINT1	1.68939e-05	0.000603662	-0.458251	0.10651	7.27618	0.0676542	0.00187416	0.00705772	0.0208146	0.0208146	-0.661116
ENST00000371072	ENSG00000162437	RAVER2	9.35084e-05	0.00273155	-0.45749	0.1171	6.83924	0.0653346	0.00472419	0.00173375	0.0227004	0.0227004	-0.660018
ENST00000395881	ENSG00000022277	RTF2	1.69523e-05	0.000605426	-0.45702	0.106243	7.67059	0.0779116	0.00226878	0.0190057	0.0203062	0.0203062	-0.65934
ENST00000406438	ENSG00000176994	SMCR8	9.84915e-06	0.000374251	-0.454083	0.102723	7.60261	0.075941	0.000787213	0.01908	0.0203169	0.0203169	-0.655103
ENST00000389266	ENSG00000106105	GARS	2.57449e-05	0.000879549	-0.450062	0.10695	8.44487	0.0664545	0.000328012	0.00968365	0.0225484	0.0225484	-0.649302
ENST00000372172	ENSG00000126107	HECTD3	0.000109574	0.00313501	-0.447114	0.115583	6.82129	0.0800191	0.00384449	0.0228742	0.0228104	0.0228742	-0.645049
ENST00000615899	ENSG00000170606	HSPA4	4.27942e-05	0.00137398	-0.446215	0.10905	8.47093	0.0760182	0.00107667	0.021242	0.0227069	0.0227069	-0.643751
ENST00000369550	ENSG00000130826	DKC1	1.37091e-05	0.000501775	-0.445042	0.102345	7.72914	0.0581107	0.000626147	0.00114877	0.0203227	0.0203227	-0.64206
ENST00000371755	ENSG00000112759	SLC29A1	0.00094335	0.0199803	-0.443796	0.134203	6.4886	0.0625333	0.0106721	-0.00336826	0.0253489	0.0253489	-0.640262
ENST00000309166	ENSG00000175352	NRIP3	3.15889e-05	0.00105472	-0.443169	0.106488	7.07172	0.0642132	0.00116497	0.00828421	0.0215142	0.0215142	-0.639357
ENST00000396210	ENSG00000008394	MGST1	0.000111699	0.00318327	-0.442746	0.114592	7.25595	0.0717137	0.00539265	0.0129319	0.0208702	0.0208702	-0.638748
ENST00000337970	ENSG00000169813	HNRNPF	4.40911e-05	0.00141227	-0.442706	0.108375	8.49318	0.0607684	0.00064329	0.00492381	0.0228472	0.0228472	-0.638689
ENST00000610387	ENSG00000215193	PEX26	9.30009e-05	0.00272025	-0.441553	0.112982	6.8252	0.0634503	0.00274369	0.00629208	0.0227863	0.0227863	-0.637025
ENST00000420329	ENSG00000140577	CRTC3	7.1726e-05	0.00216049	-0.441429	0.111177	6.85172	0.064918	0.00209527	0.00868934	0.0226256	0.0226256	-0.636847
ENST00000263246	ENSG00000100266	PACSIN2	0.000101316	0.00292431	-0.440265	0.113254	8.78412	0.0723632	0.000530034	0.0192826	0.0251228	0.0251228	-0.635168
ENST00000173527	ENSG00000066583	ISOC1	0.000170425	0.00463267	-0.439936	0.117028	6.49469	0.0595091	0.00209718	0.0028156	0.0252937	0.0252937	-0.634693
ENST00000416614	ENSG00000087269	NOP14	0.000338719	0.008292	-0.439854	0.122736	6.99765	0.0644384	0.00828299	0.00240455	0.0218454	0.0218454	-0.634575
ENST00000541679	ENSG00000132341	RAN	6.24059e-05	0.00191381	-0.439768	0.109845	7.88657	0.0759405	0.00135862	0.0227733	0.0204854	0.0227733	-0.634451
ENST00000347230	ENSG00000072121	ZFYVE26	0.000113973	0.00323719	-0.43925	0.113832	6.83557	0.0666736	0.00319297	0.0102794	0.0227227	0.0227227	-0.633703
ENST00000372358	ENSG00000130713	EXOSC2	0.000252871	0.00649389	-0.438678	0.119879	6.71544	0.0634307	0.00522628	0.00463006	0.0235158	0.0235158	-0.632878
ENST00000354371	ENSG00000198612	COPS8	0.000283593	0.00715324	-0.438364	0.120767	6.49709	0.0720418	0.0038971	0.0160973	0.0252721	0.0252721	-0.632426
ENST00000294064	ENSG00000162139	NEU3	0.000227278	0.00594424	-0.437976	0.118802	6.41647	0.0599622	0.00219648	0.00381854	0.0260315	0.0260315	-0.631865
ENST00000367075	ENSG00000092820	EZR	0.000311925	0.00776679	-0.43608	0.120959	7.6073	0.0615732	0.00894698	-0.000500028	0.0203151	0.0203151	-0.629129
ENST00000262570	ENSG00000106554	CHCHD3	3.09555e-05	0.00103613	-0.435743	0.104587	8.19428	0.0561635	0.000556491	0.001677	0.0213204	0.0213204	-0.628644
ENST00000568784	ENSG00000069329	VPS35	3.06281e-05	0.00102669	-0.432878	0.103839	8.00879	0.0591788	0.000831885	0.00574887	0.0207332	0.0207332	-0.624511
ENST00000265339	ENSG00000119048	UBE2B	0.000276387	0.00701679	-0.432827	0.119024	6.53219	0.0672483	0.00337084	0.012639	0.0249624	0.0249624	-0.624438
ENST00000359995	ENSG00000161547	SRSF2	7.64347e-05	0.00228909	-0.431243	0.109029	8.53641	0.071866	0.000641849	0.0212117	0.0231327	0.0231327	-0.622151
ENST00000260803	ENSG00000138231	DBR1	0.000307768	0.00769283	-0.42995	0.119144	6.41455	0.0555017	0.00233996	0.000792993	0.0260504	0.0260504	-0.620287
ENST00000292114	ENSG00000244045	TMEM199	7.61369e-05	0.00228219	-0.428515	0.108313	6.95062	0.0633905	0.00138563	0.0113617	0.022078	0.022078	-0.618216
ENST00000258243	ENSG00000135763	URB2	0.000171625	0.00465782	-0.426372	0.113473	6.66009	0.070718	0.00182758	0.020079	0.0239245	0.0239245	-0.615125
ENST00000404530	ENSG00000162959	MEMO1	0.000161774	0.00442057	-0.424187	0.112449	7.00036	0.0599592	0.00345694	0.00651745	0.0218325	0.0218325	-0.611971
ENST00000256854	ENSG00000134440	NARS	0.000183404	0.0049281	-0.423688	0.11326	8.79031	0.0552831	0.000474805	0.00418497	0.0251808	0.0251808	-0.611252
ENST00000526991	ENSG00000255112	CHMP1B	0.000146855	0.00405712	-0.423096	0.111449	6.78355	0.0605985	0.00179099	0.00923713	0.0230507	0.0230507	-0.610398
ENST00000492135	ENSG00000101361	NOP56	6.67869e-05	0.00203069	-0.422931	0.106066	7.6585	0.0592293	0.00219403	0.00728311	0.0203058	0.0203058	-0.610161
ENST00000380244	ENSG00000089280	FUS	0.000116423	0.00330262	-0.422012	0.109513	8.15435	0.0714435	0.00105893	0.0229272	0.0211718	0.0229272	-0.608834
ENST00000310137	ENSG00000239306	RBM14	9.80927e-05	0.00284451	-0.419081	0.107587	7.15041	0.0658126	0.00194179	0.0162966	0.0212083	0.0212083	-0.604606
ENST00000277746	ENSG00000148572	NRBF2	0.000489076	0.0114275	-0.417835	0.119838	6.55282	0.0616601	0.0039364	0.009805	0.0247858	0.0247858	-0.602808
ENST00000377798	ENSG00000137054	POLR1E	0.000133079	0.00372236	-0.415017	0.108624	6.91032	0.0585533	0.00130672	0.00959241	0.0222914	0.0222914	-0.598743
ENST00000283646	ENSG00000153574	RPIA	0.000448423	0.0106094	-0.413807	0.1179	6.48562	0.0553421	0.00242482	0.00506234	0.025376	0.025376	-0.596996
ENST00000347703	ENSG00000144354	CDCA7	0.000379493	0.00917407	-0.411219	0.115708	7.05234	0.0666553	0.00517971	0.0162178	0.0215968	0.0215968	-0.593263
ENST00000225519	ENSG00000197417	SHPK	0.00058681	0.0133472	-0.410713	0.119475	6.43215	0.0653009	0.00267061	0.0172853	0.0258782	0.0258782	-0.592534
ENST00000275532	ENSG00000243335	KCTD7	0.000197243	0.00526859	-0.409205	0.109927	6.83843	0.0582567	0.00146255	0.0106873	0.0227053	0.0227053	-0.590358
ENST00000258761	ENSG00000136261	BZW2	0.000500873	0.0116468	-0.408592	0.117402	7.97106	0.0619057	0.00692117	0.00965308	0.0206451	0.0206451	-0.589473
ENST00000409955	ENSG00000144231	POLR2D	0.000432303	0.0103	-0.408384	0.116033	6.72073	0.0522458	0.00344938	0.00191165	0.0234781	0.0234781	-0.589173
ENST00000504986	ENSG00000109133	TMEM33	7.90877e-05	0.00235811	-0.408357	0.103456	7.82286	0.0629755	0.00100777	0.0168785	0.0203986	0.0203986	-0.589134
ENST00000192788	ENSG00000065060	UHRF1BP1	0.000325094	0.00803124	-0.40668	0.113141	6.67867	0.0560663	0.00181783	0.00846342	0.0237841	0.0237841	-0.586714
ENST00000412830	ENSG00000136045	PWP1	0.000331422	0.0081574	-0.402101	0.112024	7.09978	0.0501934	0.00369902	0.000965018	0.0213997	0.0213997	-0.580108
ENST00000396912	ENSG00000146587	RBAK	0.000383815	0.00925872	-0.400944	0.112911	6.8277	0.0513593	0.00272698	0.00360689	0.0227709	0.0227709	-0.578439
ENST00000361786	ENSG00000198894	CIPC	0.000326005	0.00804474	-0.39959	0.111191	6.75833	0.0516372	0.00150899	0.00551035	0.0232181	0.0232181	-0.576486
ENST00000381482	ENSG00000125834	STK35	0.000479353	0.0112391	-0.399004	0.114261	6.65093	0.0579233	0.00211656	0.0123927	0.0239946	0.0239946	-0.57564
ENST00000302759	ENSG00000169679	BUB1	0.000203604	0.00540652	-0.398839	0.107374	8.21718	0.0576113	0.00164694	0.012542	0.0214112	0.0214112	-0.575403
ENST00000179259	ENSG00000078237	TIGAR	0.000292273	0.00734349	-0.398549	0.110034	6.93413	0.0574327	0.00205116	0.0120067	0.0221638	0.0221638	-0.574984
ENST00000353341	ENSG00000138668	HNRNPD	0.000126614	0.00355744	-0.397272	0.103646	7.96633	0.0550469	0.000850283	0.0107629	0.0206349	0.0206349	-0.573141
ENST00000193322	ENSG00000081087	OSTM1	0.000230129	0.00600253	-0.39643	0.107625	8.33452	0.0605946	0.00122353	0.0170847	0.021943	0.021943	-0.571927
ENST00000310955	ENSG00000117399	CDC20	0.000157352	0.00432068	-0.395437	0.104636	7.99764	0.0627114	0.00119126	0.0198486	0.0207061	0.0207061	-0.570494
ENST00000309971	ENSG00000119392	GLE1	0.000324362	0.0080188	-0.395266	0.109948	6.93457	0.0590317	0.00201575	0.0147761	0.0221614	0.0221614	-0.570248
ENST00000376663	ENSG00000168283	BMI1	0.000165863	0.00452138	-0.395024	0.104891	7.40759	0.0634449	0.000920742	0.0210836	0.0205247	0.0210836	-0.569899
ENST00000341369	ENSG00000187514	PTMA	0.000309859	0.00773652	-0.393515	0.1091	7.86616	0.0487062	0.00335125	0.00185455	0.0204545	0.0204545	-0.567722
ENST00000370397	ENSG00000213341	CHUK	0.000209256	0.00553059	-0.390812	0.105409	7.18916	0.0521152	0.00114749	0.00874233	0.0210747	0.0210747	-0.563822
ENST00000344420	ENSG00000213699	SLC35F6	0.000372974	0.00903907	-0.390048	0.10961	7.29299	0.0492643	0.00325811	0.0035044	0.0207707	0.0207707	-0.56272
ENST00000340648	ENSG00000160208	RRP1B	0.00013797	0.00384617	-0.38992	0.102294	7.72613	0.0536424	0.000606667	0.0112968	0.0203213	0.0203213	-0.562536
ENST00000370990	ENSG00000142864	SERBP1	0.000305277	0.00764186	-0.389903	0.107983	7.61525	0.0474747	0.00300818	0.00170422	0.0203125	0.0203125	-0.562511
ENST00000327347	ENSG00000086475	SEPHS1	0.000823106	0.0177387	-0.389528	0.116454	6.79182	0.0519081	0.00412622	0.00585575	0.0229969	0.0229969	-0.56197
ENST00000272427	ENSG00000144036	EXOC6B	0.000568441	0.0129861	-0.388731	0.112798	6.75516	0.0579407	0.00220744	0.0150196	0.0232395	0.0232395	-0.560819
ENST00000287295	ENSG00000156709	AIFM1	0.000359946	0.00874525	-0.387831	0.108702	7.14636	0.0563496	0.00240941	0.0131941	0.0212229	0.0212229	-0.559522
ENST00000378372	ENSG00000187522	HSPA14	0.00126675	0.0256198	-0.387503	0.120215	6.4096	0.0531956	0.00280389	0.00920465	0.0260996	0.0260996	-0.559049
ENST00000375120	ENSG00000169914	OTUD3	0.000286943	0.0072301	-0.383395	0.105711	7.14299	0.0524431	0.00111464	0.0110717	0.0212351	0.0212351	-0.553122
ENST00000361099	ENSG00000115415	STAT1	0.00106126	0.0220298	-0.383346	0.117096	8.98359	0.0539323	0.00020703	0.0137293	0.0272161	0.0272161	-0.553051
ENST00000273048	ENSG00000144567	RETREG2	0.000739283	0.0161916	-0.382285	0.113284	7.14618	0.0479642	0.00444282	0.00280159	0.0212235	0.0212235	-0.55152
ENST00000375512	ENSG00000185963	BICD2	0.000351427	0.00856902	-0.381037	0.10661	7.22705	0.0479706	0.00177691	0.00579231	0.0209547	0.0209547	-0.54972
ENST00000222567	ENSG00000105849	TWISTNB	0.000219905	0.00578494	-0.378723	0.102497	7.7856	0.0486866	0.000650099	0.00834047	0.0203611	0.0203611	-0.546382
ENST00000395969	ENSG00000006715	VPS41	0.000596067	0.0135396	-0.375413	0.109341	7.02785	0.0529545	0.00220586	0.0125961	0.0217052	0.0217052	-0.541606
ENST00000337288	ENSG00000084090	STARD7	0.00203747	0.0378603	-0.373393	0.121046	9.13533	0.0445728	0.000156302	0.00537122	0.029148	0.029148	-0.538691
ENST00000264279	ENSG00000055044	NOP58	0.000712839	0.0156883	-0.370468	0.109457	8.61638	0.0424425	0.000254246	0.00351321	0.0237075	0.0237075	-0.534472
ENST00000000412	ENSG00000003056	M6PR	0.000660317	0.0147734	-0.369976	0.108639	8.09296	0.0479599	0.00263759	0.00768831	0.0209674	0.0209674	-0.533762
ENST00000370508	ENSG00000120053	GOT1	0.000483623	0.0113235	-0.366784	0.105106	7.24564	0.0498721	0.00119485	0.0121457	0.0208996	0.0208996	-0.529157
ENST00000373299	ENSG00000136854	STXBP1	0.000476765	0.0111939	-0.363407	0.104024	8.0456	0.0499874	0.00081296	0.0134843	0.0208291	0.0208291	-0.524284
ENST00000567159	ENSG00000213614	HEXA	0.000826551	0.0178073	-0.363085	0.108586	7.43963	0.0482478	0.00310952	0.00923608	0.0204724	0.0204724	-0.52382
ENST00000316334	ENSG00000139517	LNX2	0.00126615	0.0256155	-0.362937	0.11259	6.6929	0.041109	0.00167402	0.00237859	0.0236788	0.0236788	-0.523608
ENST00000299300	ENSG00000166226	CCT2	0.00180567	0.0343931	-0.361748	0.115928	8.90275	0.0427662	0.000568198	0.00570511	0.0263103	0.0263103	-0.521892
ENST00000396503	ENSG00000171490	RSL1D1	0.000511689	0.0118541	-0.361528	0.10405	8.02643	0.0435879	0.000874858	0.0064103	0.0207779	0.0207779	-0.521574
ENST00000330263	ENSG00000053372	MRTO4	0.000544743	0.0125293	-0.359913	0.104089	8.14336	0.0453469	0.0005361	0.00918952	0.0211331	0.0211331	-0.519244
ENST00000349038	ENSG00000011304	PTBP1	0.00103862	0.0216661	-0.356709	0.108758	8.12893	0.045534	0.00257287	0.00813626	0.0210836	0.0210836	-0.514622
ENST00000331821	ENSG00000099901	RANBP1	0.000583497	0.0132808	-0.355893	0.103482	7.87875	0.0422599	0.000943954	0.00613925	0.0204732	0.0204732	-0.513445
ENST00000453153	ENSG00000138399	FASTKD1	0.0010889	0.0225551	-0.354878	0.108642	7.20652	0.0386538	0.00258776	0.000529002	0.0210184	0.0210184	-0.51198
ENST00000477128	ENSG00000108651	UTP6	0.00187387	0.0353637	-0.35322	0.113593	6.92989	0.0401414	0.00362044	0.00162315	0.0221861	0.0221861	-0.509588
ENST00000305253	ENSG00000166402	TUB	0.00103385	0.0215798	-0.353147	0.107629	7.02103	0.0404155	0.00143178	0.00414865	0.0217362	0.0217362	-0.509483
ENST00000361055	ENSG00000144744	UBA3	0.00137576	0.027407	-0.349987	0.109382	8.5109	0.0376887	0.000966577	0.00217319	0.0229621	0.0229621	-0.504925
ENST00000460766	ENSG00000136718	IMP4	0.000709385	0.0156413	-0.349775	0.103303	7.77355	0.0403477	0.000991832	0.00529964	0.020351	0.020351	-0.504618
ENST00000254193	ENSG00000131876	SNRPA1	0.000739602	0.0161916	-0.348181	0.103181	7.73207	0.0457385	0.000968602	0.011983	0.0203241	0.0203241	-0.502319
ENST00000305885	ENSG00000168496	FEN1	0.000711517	0.015668	-0.346192	0.102269	7.69273	0.0374066	0.000608331	0.00308312	0.0203097	0.0203097	-0.499449
ENST00000307720	ENSG00000171497	PPID	0.00165079	0.0319644	-0.345994	0.109952	6.90885	0.0384588	0.0018793	0.00308528	0.0222995	0.0222995	-0.499164
ENST00000022615	ENSG00000078668	VDAC3	0.000789532	0.0171241	-0.344749	0.102713	7.92074	0.0424301	0.000555903	0.00932866	0.0205438	0.0205438	-0.497367
ENST00000327300	ENSG00000121774	KHDRBS1	0.00141554	0.0281086	-0.344654	0.107993	8.51209	0.037082	0.000354827	0.00331201	0.0229699	0.0229699	-0.497231
ENST00000369466	ENSG00000116830	TTF2	0.00093131	0.0197686	-0.342264	0.103388	7.5524	0.0393455	0.00103281	0.00582196	0.0203452	0.0203452	-0.493783
ENST00000368232	ENSG00000160818	GPATCH4	0.00134617	0.0269525	-0.340685	0.106266	7.23031	0.0401987	0.00164029	0.0065695	0.0209448	0.0209448	-0.491504
ENST00000377705	ENSG00000162408	NOL9	0.000978293	0.0206194	-0.337848	0.102481	7.64907	0.0359031	0.000698445	0.00314141	0.0203062	0.0203062	-0.487411
ENST00000081029	ENSG00000061794	MRPS35	0.00114951	0.0236155	-0.334282	0.10282	7.66418	0.0372211	0.000838184	0.00533833	0.0203059	0.0203059	-0.482266
ENST00000366535	ENSG00000035687	ADSS	0.00217657	0.0399754	0.318543	0.103929	8.17357	0.032326	0.00036062	0.00352973	0.0212418	0.0212418	0.459561
ENST00000313368	ENSG00000178913	TAF7	0.000914915	0.0194633	0.341693	0.103061	8.03763	0.0360745	0.000435489	0.00273325	0.0208075	0.0208075	0.492959
ENST00000371142	ENSG00000077147	TM9SF3	0.00181594	0.0345594	0.34318	0.110036	8.64472	0.0392706	0.000289729	0.00626847	0.0239262	0.0239262	0.495104
ENST00000368885	ENSG00000123505	AMD1	0.00145715	0.0287578	0.34466	0.108279	8.30261	0.0395911	0.00166134	0.00493138	0.0217872	0.0217872	0.497239
ENST00000373204	ENSG00000092847	AGO1	0.000681399	0.0151277	0.34965	0.10293	7.69881	0.0391705	0.00087811	0.00406908	0.0203112	0.0203112	0.504438
ENST00000332512	ENSG00000183421	RIPK4	0.000668796	0.0149312	0.351903	0.103438	7.67212	0.0416253	0.00109256	0.00619168	0.0203064	0.0203064	0.507689
ENST00000396373	ENSG00000139083	ETV6	0.00123958	0.0251531	0.35491	0.109892	6.84018	0.041552	0.00145794	0.00503244	0.0226947	0.0226947	0.512026
ENST00000031146	ENSG00000029364	SLC39A9	0.000746165	0.0162984	0.355398	0.105396	7.31425	0.0428447	0.00149865	0.00638409	0.020718	0.020718	0.512731
ENST00000264607	ENSG00000065802	ASB1	0.000709766	0.0156446	0.359079	0.106055	7.15552	0.0441971	0.00130528	0.00727888	0.02119	0.02119	0.518041
ENST00000249647	ENSG00000092531	SNAP23	0.000582301	0.0132625	0.360559	0.104822	7.32852	0.0497127	0.00129089	0.0133729	0.0206845	0.0206845	0.520177
ENST00000376547	ENSG00000102572	STK24	0.000403864	0.0096803	0.363259	0.102687	7.74245	0.043595	0.000759403	0.00611572	0.0203297	0.0203297	0.524072
ENST00000274311	ENSG00000152684	PELO	0.000504771	0.0117254	0.363786	0.10459	7.33624	0.0493739	0.00121118	0.0122784	0.0206669	0.0206669	0.524832
ENST00000225724	ENSG00000108587	GOSR1	0.000695111	0.0153616	0.364571	0.107496	7.02887	0.0448611	0.00140999	0.0066239	0.0217006	0.0217006	0.525965
ENST00000457408	ENSG00000158604	TMED4	0.000364471	0.0088425	0.367239	0.103025	7.93025	0.0517455	0.000666743	0.0147483	0.0205616	0.0205616	0.529813
ENST00000244040	ENSG00000124209	RAB22A	0.000321592	0.00796196	0.367587	0.102186	7.75289	0.0495035	0.00054763	0.0121662	0.0203361	0.0203361	0.530316
ENST00000376387	ENSG00000125304	TM9SF2	0.000623953	0.0140739	0.369081	0.107887	8.51762	0.0469948	0.00027288	0.00914758	0.0230065	0.0230065	0.53247
ENST00000369367	ENSG00000139218	SCAF11	0.000472163	0.0110935	0.369275	0.105626	7.44274	0.0476818	0.0018459	0.00832825	0.0204677	0.0204677	0.532751
ENST00000201031	ENSG00000087510	TFAP2C	0.000350764	0.00855902	0.369459	0.103357	7.40519	0.0511117	0.000836395	0.0132939	0.0205288	0.0205288	0.533016
ENST00000311086	ENSG00000145919	BOD1	0.000318993	0.00791498	0.372367	0.103453	7.53177	0.0557535	0.0010433	0.0177835	0.0203619	0.0203619	0.537211
ENST00000264235	ENSG00000082701	GSK3B	0.000276473	0.00701679	0.373062	0.102591	7.64215	0.0434133	0.000742963	0.0035142	0.0203068	0.0203068	0.538214
ENST00000360150	ENSG00000087502	ERGIC2	0.000313576	0.00779772	0.374036	0.103789	7.50709	0.0462922	0.00115855	0.0062146	0.0203857	0.0203857	0.53962
ENST00000331222	ENSG00000182372	CLN8	0.000381098	0.0092063	0.374413	0.105384	7.26207	0.0548772	0.00135867	0.0159363	0.020853	0.020853	0.540164
ENST00000314574	ENSG00000176105	YES1	0.000311178	0.00775516	0.376352	0.104374	7.84987	0.0521863	0.00135588	0.0123145	0.0204319	0.0204319	0.542961
ENST00000281405	ENSG00000118965	WDR35	0.000735341	0.0161192	0.376402	0.111492	7.37874	0.0448839	0.00428304	0.000855261	0.0205779	0.0205779	0.543034
ENST00000369110	ENSG00000085377	PREP	0.000257384	0.00658913	0.376499	0.103015	8.02292	0.0417669	0.00045537	0.00102216	0.0207688	0.0207688	0.543173
ENST00000382581	ENSG00000179010	MRFAP1	0.000526011	0.0121521	0.376895	0.108705	8.56848	0.0527909	0.000277647	0.0139617	0.0233558	0.0233558	0.543745
ENST00000335753	ENSG00000065613	SLK	0.000266512	0.00680481	0.377255	0.103475	7.94789	0.0550586	0.000818015	0.0159765	0.0205962	0.0205962	0.544263
ENST00000323116	ENSG00000058063	ATP11B	0.000262321	0.00670538	0.381345	0.10448	7.44051	0.0498682	0.00136128	0.00834351	0.020471	0.020471	0.550165
ENST00000286548	ENSG00000156052	GNAQ	0.000191471	0.00513264	0.381985	0.102408	7.6392	0.0464247	0.000667787	0.00485697	0.0203072	0.0203072	0.551087
ENST00000311669	ENSG00000159322	ADPGK	0.000565209	0.0129254	0.382335	0.110893	7.13422	0.0488491	0.00332716	0.00493665	0.0212674	0.0212674	0.551593
ENST00000341255	ENSG00000188636	RTL6	0.000381332	0.00920869	0.384353	0.108187	6.94229	0.0524006	0.00128777	0.0106039	0.022121	0.022121	0.554504
ENST00000344922	ENSG00000154305	MIA3	0.00118093	0.0241657	0.385216	0.118767	6.91956	0.0475765	0.00597004	7.21633e-05	0.0222413	0.0222413	0.555748
ENST00000257787	ENSG00000135334	AKIRIN2	0.000536441	0.0123635	0.387419	0.111911	6.73475	0.0535253	0.00166823	0.0107466	0.0233797	0.0233797	0.558928
ENST00000296255	ENSG00000163902	RPN1	0.000561796	0.012856	0.387849	0.112439	8.75246	0.0514132	0.00045213	0.00938773	0.0248329	0.0248329	0.559547
ENST00000355235	ENSG00000197226	TBC1D9B	0.000229618	0.0059962	0.388591	0.105481	8.01285	0.052525	0.00150936	0.00943542	0.0207432	0.0207432	0.560618
ENST00000356554	ENSG00000198162	MAN1A2	0.000275759	0.00701182	0.391083	0.107527	8.49715	0.0553658	0.000251459	0.0133599	0.0228727	0.0228727	0.564214
ENST00000399788	ENSG00000073614	KDM5A	0.000457325	0.0107898	0.391854	0.111812	6.96269	0.0505134	0.00298714	0.00476203	0.0220166	0.0220166	0.565325
ENST00000426431	ENSG00000185591	SP1	0.000119658	0.0033774	0.393284	0.102236	7.74801	0.0500238	0.000571351	0.00623224	0.020333	0.020333	0.567389
ENST00000307602	ENSG00000168172	HOOK3	0.000109447	0.00313362	0.397579	0.10277	7.54499	0.0629403	0.000772485	0.0199681	0.0203509	0.0203509	0.573585
ENST00000567212	ENSG00000103353	UBFD1	0.000177005	0.00478084	0.397942	0.106125	7.53915	0.0483973	0.00216932	0.00150834	0.0203556	0.0203556	0.574108
ENST00000370867	ENSG00000162623	TYW3	0.000298837	0.00749173	0.398444	0.11018	7.09438	0.0537562	0.00285786	0.00693849	0.0214213	0.0214213	0.574833
ENST00000299413	ENSG00000166326	TRIM44	0.000385654	0.00929647	0.400008	0.112688	8.78879	0.0518674	0.000230427	0.006946	0.0251666	0.0251666	0.57709
ENST00000358689	ENSG00000197217	ENTPD4	0.000105151	0.00302212	0.400497	0.103264	7.59154	0.0535962	0.00100521	0.00805772	0.0203216	0.0203216	0.577795
ENST00000270139	ENSG00000142166	IFNAR1	9.04018e-05	0.00265109	0.400939	0.102411	7.61532	0.0564681	0.000663535	0.0116318	0.0203125	0.0203125	0.578433
ENST00000264914	ENSG00000113273	ARSB	0.000154382	0.00424945	0.400955	0.105963	7.15988	0.0579343	0.00128177	0.0127199	0.0211746	0.0211746	0.578456
ENST00000284006	ENSG00000153885	KCTD15	0.000133931	0.00374283	0.401253	0.105064	7.34229	0.0513514	0.00142357	0.00481841	0.0206535	0.0206535	0.578885
ENST00000259963	ENSG00000137414	FAM8A1	0.000120608	0.00339855	0.402754	0.10475	7.18721	0.05775	0.000864192	0.0124407	0.0210811	0.0210811	0.58105
ENST00000296328	ENSG00000163960	UBXN7	0.000161314	0.00441335	0.403028	0.10682	7.15012	0.0532096	0.00161155	0.00632254	0.0212093	0.0212093	0.581446
ENST00000409064	ENSG00000115548	KDM3A	0.000142864	0.00396142	0.403731	0.106157	7.33901	0.0534088	0.00187786	0.00609951	0.0206607	0.0206607	0.58246
ENST00000358701	ENSG00000165661	QSOX2	9.92293e-05	0.00286774	0.404053	0.103804	7.37001	0.0538554	0.000955386	0.00745624	0.0205951	0.0205951	0.582925
ENST00000388712	ENSG00000135052	GOLM1	0.000183574	0.00493073	0.405208	0.108327	8.54328	0.0660855	0.000289686	0.0220789	0.0231796	0.0231796	0.584591
ENST00000370982	ENSG00000172380	GNG12	0.000344603	0.00841779	0.407422	0.11383	8.84707	0.0641943	0.000181679	0.0193806	0.0257326	0.0257326	0.587786
ENST00000292599	ENSG00000161021	MAML1	6.75454e-05	0.00204731	0.407825	0.102346	7.63128	0.0531055	0.000640857	0.00587517	0.0203085	0.0203085	0.588366
ENST00000262039	ENSG00000078142	PIK3C3	0.00066042	0.0147734	0.408341	0.119906	6.52976	0.0610953	0.00377143	0.0119257	0.0249835	0.0249835	0.589111
ENST00000221086	ENSG00000104643	MTMR9	0.000922634	0.0196029	0.408614	0.123332	6.31328	0.053986	0.00330512	0.00402335	0.0271166	0.0271166	0.589505
ENST00000271277	ENSG00000143079	CTTNBP2NL	0.000303141	0.00759119	0.411571	0.113926	6.64783	0.0592785	0.00194001	0.0107547	0.0240185	0.0240185	0.593771
ENST00000286371	ENSG00000069849	ATP1B3	0.000221183	0.00581177	0.411766	0.111484	8.70672	0.0681475	0.000424091	0.0225644	0.0244331	0.0244331	0.594052
ENST00000373647	ENSG00000011454	RABGAP1	0.000279146	0.00707081	0.412858	0.113612	6.75376	0.06178	0.00256644	0.0126931	0.023249	0.023249	0.595627
ENST00000370113	ENSG00000162694	EXTL2	0.00017896	0.00482785	0.413993	0.110486	6.89099	0.058364	0.00201595	0.00894536	0.0223985	0.0223985	0.597265
ENST00000378073	ENSG00000105429	MEGF8	0.000546813	0.0125726	0.414563	0.11993	7.24633	0.0652391	0.00786879	0.010956	0.0208976	0.0208976	0.598088
ENST00000616986	ENSG00000077232	DNAJC10	8.83903e-05	0.00259773	0.416694	0.106288	8.30875	0.0627983	0.000777698	0.0146089	0.0218165	0.0218165	0.601162
ENST00000272638	ENSG00000144224	UBXN4	0.000150711	0.00415686	0.417106	0.110057	8.39644	0.059665	0.00195554	0.00966118	0.0222697	0.0222697	0.601756
ENST00000398073	ENSG00000175215	CTDSP2	7.26083e-05	0.00218318	0.417402	0.105203	7.28696	0.0592394	0.00134927	0.00968861	0.0207862	0.0207862	0.602183
ENST00000611717	ENSG00000275052	PPP4R3B	0.000305432	0.00764276	0.417402	0.115603	6.88676	0.0661939	0.00430574	0.0148457	0.0224224	0.0224224	0.602183
ENST00000394464	ENSG00000113580	NR3C1	0.000118125	0.00333969	0.41806	0.108587	7.27355	0.0632766	0.00276082	0.0128038	0.0208217	0.0208217	0.603133
ENST00000425019	ENSG00000071054	MAP4K4	0.000161518	0.00441716	0.418609	0.110959	8.03092	0.0711727	0.00302038	0.0216033	0.0207896	0.0216033	0.603925
ENST00000471696	ENSG00000198843	SELENOT	4.95084e-05	0.00156858	0.418674	0.103174	7.93133	0.0613062	0.000726144	0.0123685	0.0205637	0.0205637	0.604018
ENST00000366510	ENSG00000143653	SCCPDH	9.48215e-05	0.00276514	0.419249	0.107404	8.01125	0.0699954	0.000392213	0.0226791	0.0207393	0.0226791	0.604849
ENST00000306052	ENSG00000157193	LRP8	4.45702e-05	0.00142425	0.420234	0.102938	7.62494	0.0670981	0.000882432	0.0185332	0.0203099	0.0203099	0.606269
ENST00000265742	ENSG00000001629	ANKIB1	5.1271e-05	0.0016155	0.420977	0.103951	7.98655	0.0691592	0.000519209	0.0210925	0.02068	0.0210925	0.607342
ENST00000394196	ENSG00000173575	CHD2	5.54206e-05	0.00172776	0.421019	0.104432	7.62058	0.0677361	0.00150116	0.0184387	0.020311	0.020311	0.607401
ENST00000262120	ENSG00000128791	TWSG1	0.000116587	0.00330589	0.424705	0.110221	6.9251	0.0692733	0.00208591	0.0186082	0.0222116	0.0222116	0.612719
ENST00000400334	ENSG00000197563	PIGN	0.00133909	0.0268583	0.427731	0.133355	6.39047	0.0633008	0.00927477	0.00359161	0.0262921	0.0262921	0.617085
ENST00000295770	ENSG00000163527	STT3B	9.59827e-05	0.00279298	0.427923	0.109709	8.62696	0.063794	0.000283944	0.013103	0.0237882	0.0237882	0.617362
ENST00000361778	ENSG00000165282	PIGO	0.000378093	0.00915003	0.428434	0.120519	6.81492	0.067054	0.0061994	0.010845	0.0228501	0.0228501	0.618099
ENST00000323468	ENSG00000178202	KDELC2	4.359e-05	0.00139688	0.428867	0.10492	8.14581	0.0681971	0.0008746	0.0173797	0.0211416	0.0211416	0.618724
ENST00000261537	ENSG00000101752	MIB1	2.51298e-05	0.00086027	0.43161	0.102432	7.67993	0.0634423	0.000677276	0.011243	0.0203073	0.0203073	0.622681
ENST00000376747	ENSG00000102595	UGGT2	0.000252728	0.00649389	0.431733	0.117976	6.47223	0.0688872	0.00233804	0.0158994	0.0254989	0.0254989	0.622858
ENST00000489567	ENSG00000124783	SSR1	0.000108976	0.00312409	0.433027	0.111903	7.03711	0.068891	0.00338069	0.0144878	0.0216637	0.0216637	0.624726
ENST00000513973	ENSG00000013375	PGM3	4.99656e-05	0.00157878	0.436026	0.107507	7.11562	0.0617462	0.00177778	0.00688655	0.0213378	0.0213378	0.629052
ENST00000264065	ENSG00000077232	DNAJC10	0.000204051	0.00541626	0.437153	0.117706	6.57094	0.0609652	0.00307545	0.00434973	0.0246338	0.0246338	0.630678
ENST00000218348	ENSG00000102226	USP11	3.96248e-05	0.00128379	0.43781	0.106532	7.29418	0.0726156	0.00193046	0.0188953	0.0207676	0.0207676	0.631625
ENST00000430215	ENSG00000115486	GGCX	3.65847e-05	0.00119617	0.438504	0.106225	7.12771	0.06241	0.00127591	0.00744048	0.0212918	0.0212918	0.632627
ENST00000368324	ENSG00000132718	SYT11	3.37009e-05	0.00111629	0.438625	0.105772	7.12685	0.0580392	0.00108035	0.0025015	0.021295	0.021295	0.632801
ENST00000353704	ENSG00000107175	CREB3	4.12409e-05	0.00132915	0.438955	0.107051	7.74095	0.0609956	0.0025911	0.00434331	0.0203289	0.0203289	0.633278
ENST00000253814	ENSG00000131507	NDFIP1	2.20586e-05	0.000766763	0.440846	0.103901	8.16489	0.0685839	0.000380823	0.014852	0.0212098	0.0212098	0.636006
ENST00000299157	ENSG00000166130	IKBIP	1.63664e-05	0.000587601	0.44194	0.102551	7.53148	0.0693033	0.000671411	0.015079	0.0203621	0.0203621	0.637584
ENST00000538427	ENSG00000055208	TAB2	2.63625e-05	0.00089974	0.44257	0.105303	7.28273	0.0656131	0.00138038	0.00987879	0.0207972	0.0207972	0.638493
ENST00000251047	ENSG00000074695	LMAN1	0.000115634	0.0032816	0.442628	0.114813	8.89185	0.0647689	0.000169823	0.0100874	0.0261943	0.0261943	0.638577
ENST00000316902	ENSG00000092068	SLC7A8	0.000447356	0.0105878	0.444349	0.126579	9.28652	0.0687066	0.000638567	0.0137037	0.031406	0.031406	0.64106
ENST00000261942	ENSG00000113194	FAF2	3.10734e-05	0.00103956	0.444377	0.106682	8.43384	0.0642278	0.000278833	0.00882987	0.0224831	0.0224831	0.641101
ENST00000367123	ENSG00000171943	SRGAP2C	2.15032e-05	0.000751313	0.445968	0.104966	8.21984	0.0697262	0.00061375	0.0144376	0.021422	0.021422	0.643395
ENST00000268035	ENSG00000140443	IGF1R	0.00011248	0.00320283	0.44885	0.116223	8.53054	0.0715384	0.00392286	0.0123831	0.0230929	0.0230929	0.647554
ENST00000256079	ENSG00000133704	IPO8	1.41585e-05	0.000517105	0.449495	0.103537	8.09742	0.0627004	0.000458664	0.00534312	0.0209812	0.0209812	0.648484
ENST00000421351	ENSG00000112378	PERP	1.41729e-05	0.000517351	0.450691	0.103818	8.15773	0.0698302	0.000372456	0.0133886	0.0211839	0.0211839	0.650209
ENST00000378438	ENSG00000182220	ATP6AP2	0.000126996	0.00356669	0.451949	0.117934	8.06612	0.0822026	0.000433463	0.0273835	0.0208869	0.0273835	0.652024
ENST00000226760	ENSG00000109501	WFS1	0.000223643	0.00586051	0.452159	0.122513	6.49638	0.0785793	0.0047405	0.0187863	0.0252785	0.0252785	0.652327
ENST00000321612	ENSG00000178445	GLDC	2.24321e-05	0.000778947	0.453551	0.10699	7.70857	0.078397	0.000622307	0.0222714	0.0203142	0.0222714	0.654335
ENST00000355689	ENSG00000197557	TTC30A	0.000107306	0.00308274	0.453559	0.117094	6.4892	0.0626693	0.00207881	0.00246344	0.0253434	0.0253434	0.654347
ENST00000239165	ENSG00000260027	HOXB7	6.44673e-05	0.00196887	0.453847	0.11358	6.67139	0.0787153	0.00196209	0.0212135	0.0238387	0.0238387	0.654762
ENST00000373275	ENSG00000165288	BRWD3	0.000305539	0.00764276	0.454059	0.125759	6.24874	0.0718741	0.00375986	0.01137	0.0278707	0.0278707	0.655069
ENST00000269097	ENSG00000141349	G6PC3	0.000118575	0.00334965	0.456646	0.118638	6.88654	0.0837073	0.00275241	0.0253978	0.0224236	0.0253978	0.6588
ENST00000375208	ENSG00000127463	EMC1	2.06943e-05	0.000725296	0.457034	0.107354	8.03211	0.0764795	0.0022569	0.0173426	0.0207928	0.0207928	0.65936
ENST00000299608	ENSG00000166479	TMX3	7.15586e-06	0.000281548	0.458657	0.102174	7.82591	0.0741331	0.000476793	0.0158896	0.0204021	0.0204021	0.661702
ENST00000260746	ENSG00000138175	ARL3	0.000242978	0.00628272	0.460206	0.125412	6.16827	0.0795092	0.0025516	0.0196125	0.0289049	0.0289049	0.663937
ENST00000272519	ENSG00000144118	RALB	2.47245e-05	0.00084768	0.460471	0.109186	7.91655	0.071647	0.00330704	0.00960326	0.0205362	0.0205362	0.664319
ENST00000414423	ENSG00000162923	WDR26	1.48807e-05	0.000540279	0.460735	0.106394	7.82121	0.0800559	0.00104943	0.0215901	0.0203967	0.0215901	0.6647
ENST00000237530	ENSG00000118705	RPN2	0.000310893	0.00775377	0.461064	0.127858	9.35289	0.0816292	0.000182332	0.0241919	0.0325132	0.0325132	0.665174
ENST00000261951	ENSG00000113300	CNOT6	2.19583e-05	0.000764454	0.465093	0.109589	7.46804	0.0725592	0.00358731	0.00896135	0.020432	0.020432	0.670987
ENST00000297273	ENSG00000127995	CASD1	7.63777e-05	0.00228839	0.467414	0.118168	6.49151	0.0824969	0.00260507	0.0208161	0.0253225	0.0253225	0.674335
ENST00000551812	ENSG00000076108	BAZ2A	2.65719e-05	0.000905518	0.468968	0.111632	7.42106	0.0770667	0.00442163	0.0121792	0.0205018	0.0205018	0.676577
ENST00000264896	ENSG00000138760	SCARB2	0.000245516	0.0063356	0.469119	0.127934	9.35629	0.0853756	0.00016203	0.0260853	0.032572	0.032572	0.676795
ENST00000405409	ENSG00000100320	RBFOX2	4.7733e-06	0.000196006	0.469282	0.102586	7.6715	0.0737272	0.000741569	0.0118649	0.0203063	0.0203063	0.677031
ENST00000264689	ENSG00000109775	UFSP2	0.000553008	0.0126935	0.469403	0.135914	6.07393	0.0817928	0.0066751	0.0153036	0.0302702	0.0302702	0.677204
ENST00000392547	ENSG00000115935	WIPF1	1.08175e-05	0.000407542	0.470441	0.106915	8.44619	0.0733424	0.000305225	0.0114892	0.0225563	0.0225563	0.678703
ENST00000446594	ENSG00000226539	AC012512.1	3.40733e-05	0.00112547	0.47119	0.113694	6.66365	0.0764347	0.00195513	0.0132121	0.0238974	0.0238974	0.679783
ENST00000335251	ENSG00000164066	INTU	6.7372e-05	0.0020448	0.473015	0.118688	6.42382	0.0759243	0.00221423	0.011783	0.0259593	0.0259593	0.682416
ENST00000360568	ENSG00000072682	P4HA2	0.00169148	0.0325939	0.473993	0.15097	6.67968	0.0733742	0.0218071	-0.0110937	0.0237766	0.0237766	0.683827
ENST00000264431	ENSG00000109756	RAPGEF2	6.33419e-05	0.00194163	0.474328	0.118582	6.70824	0.0883878	0.00178727	0.0263361	0.0235674	0.0263361	0.684311
ENST00000256497	ENSG00000134109	EDEM1	4.60219e-06	0.000190133	0.474771	0.103613	8.12243	0.0702654	0.000409408	0.00643121	0.0210619	0.0210619	0.684949
ENST00000397511	ENSG00000124783	SSR1	6.74656e-06	0.000267465	0.475099	0.105542	8.22015	0.0698299	0.000854761	0.0053738	0.0214233	0.0214233	0.685423
ENST00000602402	ENSG00000102580	DNAJC3	3.76099e-06	0.000158277	0.475587	0.102848	7.93655	0.0789049	0.000581733	0.0160797	0.0205737	0.0205737	0.686127
ENST00000371224	ENSG00000059573	ALDH18A1	6.13215e-05	0.00188482	0.475804	0.118723	7.6931	0.0888459	0.00310341	0.0250871	0.0203098	0.0250871	0.686439
ENST00000410026	ENSG00000173559	NABP1	6.12643e-05	0.00188478	0.47855	0.119402	6.71284	0.0898718	0.00224851	0.0262652	0.0235344	0.0262652	0.690401
ENST00000542569	ENSG00000156671	SAMD8	2.36582e-05	0.000815665	0.480074	0.113567	6.91477	0.0810038	0.00352761	0.0141533	0.0222672	0.0222672	0.692599
ENST00000402966	ENSG00000184208	C22orf46	2.35776e-05	0.000813302	0.481792	0.113953	6.63583	0.086225	0.00185883	0.0213625	0.0241116	0.0241116	0.695078
ENST00000397977	ENSG00000104613	INTS10	3.73215e-06	0.000157357	0.482528	0.104313	7.41743	0.0767705	0.00125464	0.0106997	0.0205078	0.0205078	0.696141
ENST00000369085	ENSG00000151929	BAG3	2.17221e-06	9.60723e-05	0.486986	0.102811	7.58826	0.0753566	0.00081708	0.00804707	0.0203232	0.0203232	0.702572
ENST00000306376	ENSG00000244405	ETV5	4.2978e-05	0.00137923	0.487046	0.119057	8.63996	0.0920748	0.000290705	0.0280585	0.0238889	0.0280585	0.702659
ENST00000306085	ENSG00000169871	TRIM56	3.70929e-06	0.00015649	0.487212	0.105297	7.6439	0.0868286	0.000745544	0.0214293	0.0203066	0.0214293	0.702898
ENST00000262498	ENSG00000070761	CFAP20	9.98236e-06	0.000378675	0.487632	0.110385	6.86345	0.0703165	0.0018133	0.000960872	0.0225564	0.0225564	0.703504
ENST00000333896	ENSG00000115306	SPTBN1	3.84954e-05	0.00125067	0.488016	0.118556	8.83634	0.0921409	0.000393455	0.0277177	0.0256255	0.0277177	0.704058
ENST00000551848	ENSG00000151746	BICD1	0.000420625	0.0100429	0.488181	0.138421	5.9136	0.0908015	0.00527338	0.0212215	0.0330471	0.0330471	0.704296
ENST00000622306	ENSG00000185164	NOMO2	1.1126e-05	0.000417979	0.490336	0.111591	8.52998	0.0833319	0.00181598	0.0152615	0.0230891	0.0230891	0.707405
ENST00000576463	ENSG00000262795	IFNGR2	0.000140653	0.00390972	0.490364	0.128805	7.31912	0.0971434	0.00385965	0.029322	0.0207064	0.029322	0.707445
ENST00000607778	ENSG00000272047	GTF2H5	9.72487e-05	0.00282497	0.490665	0.125897	6.61201	0.0959576	0.00180015	0.0298999	0.0242994	0.0298999	0.707879
ENST00000434494	ENSG00000167004	PDIA3	0.000117083	0.00331716	0.491081	0.127482	9.34329	0.094708	0.000155024	0.0299508	0.0323484	0.0323484	0.70848
ENST00000342374	ENSG00000132824	SERINC3	1.79995e-06	8.08596e-05	0.492504	0.103149	7.61473	0.0812919	0.000966888	0.0130202	0.0203126	0.0203126	0.710533
ENST00000351870	ENSG00000127989	MTERF1	0.000111423	0.00317986	0.492577	0.12747	6.27444	0.0845955	0.00493432	0.0128829	0.0275628	0.0275628	0.710638
ENST00000345330	ENSG00000156642	NPTN	4.75797e-05	0.00151044	0.492608	0.121117	7.70992	0.0944796	0.00170551	0.0276331	0.0203147	0.0276331	0.710683
ENST00000225719	ENSG00000108582	CPD	3.03488e-06	0.000130311	0.495307	0.106097	8.33794	0.0817228	0.000552937	0.0130138	0.0219602	0.0219602	0.714577
ENST00000317483	ENSG00000112210	RAB23	9.35703e-05	0.00273218	0.495553	0.126847	6.17828	0.0933708	0.00341044	0.0236646	0.02877	0.02877	0.714931
ENST00000451899	ENSG00000164823	OSGIN2	4.08016e-05	0.0013175	0.496097	0.120914	7.49575	0.0914015	0.00884229	0.0157555	0.0203981	0.0203981	0.715716
ENST00000612696	ENSG00000244306	AL589743.1	3.36322e-05	0.0011147	0.496198	0.119642	6.4854	0.0761212	0.00325029	0.00348712	0.0253779	0.0253779	0.715861
ENST00000272167	ENSG00000143819	EPHX1	0.000119237	0.00336693	0.496815	0.12912	6.90017	0.0991021	0.00537328	0.0279708	0.0223473	0.0279708	0.716752
ENST00000263708	ENSG00000088179	PTPN4	2.97954e-05	0.00100333	0.497097	0.119064	6.47811	0.0906101	0.00290801	0.0204354	0.0254446	0.0254446	0.717158
ENST00000398022	ENSG00000101337	TM9SF4	3.64003e-06	0.000154067	0.497724	0.107478	7.46594	0.0876212	0.00266816	0.0169802	0.0204348	0.0204348	0.718063
ENST00000524189	ENSG00000197892	KIF13B	5.58266e-06	0.000225818	0.499371	0.109955	6.88336	0.0857761	0.00173836	0.0152101	0.0224417	0.0224417	0.720439
ENST00000393888	ENSG00000173786	CNP	1.64457e-05	0.000589198	0.499694	0.115982	8.50609	0.0944012	0.000330082	0.0265735	0.0229307	0.0265735	0.720905
ENST00000383791	ENSG00000131370	SH3BP5	1.81363e-06	8.13286e-05	0.50009	0.104771	8.07862	0.0797697	0.00103041	0.00867076	0.0209237	0.0209237	0.721477
ENST00000380764	ENSG00000124535	WRNIP1	5.84373e-05	0.0018118	0.500169	0.12445	6.6168	0.0980273	0.00456061	0.026415	0.0242613	0.026415	0.72159
ENST00000303155	ENSG00000171208	NETO2	2.17047e-06	9.60584e-05	0.501425	0.105856	7.23056	0.0882504	0.00146681	0.017683	0.0209441	0.0209441	0.723403
ENST00000399352	ENSG00000205726	ITSN1	1.60703e-05	0.000577582	0.502493	0.116494	6.72382	0.0809802	0.00368517	0.00662544	0.0234563	0.0234563	0.724943
ENST00000491511	ENSG00000144815	NXPE3	4.79838e-05	0.00152255	0.502891	0.123705	6.55298	0.0840812	0.00582143	0.00797368	0.0247845	0.0247845	0.725517
ENST00000207870	ENSG00000093217	XYLB	7.11217e-05	0.00214515	0.503209	0.126673	6.21735	0.077892	0.00383118	0.00263656	0.0282609	0.0282609	0.725976
ENST00000341590	ENSG00000073712	FERMT2	0.000107904	0.00309861	0.503852	0.130124	6.89509	0.10156	0.00879212	0.0250723	0.0223755	0.0250723	0.726904
ENST00000374168	ENSG00000117676	RPS6KA1	7.93932e-05	0.00236409	0.504748	0.127907	6.54136	0.0985262	0.00783674	0.0221869	0.0248835	0.0248835	0.728197
ENST00000629832	ENSG00000281877	RPS6KA1	7.93932e-05	0.00236409	0.504748	0.127907	6.54136	0.0985262	0.00783674	0.0221869	0.0248835	0.0248835	0.728197
ENST00000395957	ENSG00000164924	YWHAZ	3.58517e-05	0.00117674	0.505093	0.122218	6.5693	0.0870491	0.00522722	0.0112904	0.0246475	0.0246475	0.728695
ENST00000528499	ENSG00000084234	APLP2	9.3719e-05	0.00273416	0.505572	0.129425	6.39343	0.0880947	0.00723953	0.0103366	0.026262	0.026262	0.729386
ENST00000285599	ENSG00000013288	MAN2B2	0.000803532	0.0173721	0.506642	0.151165	5.7231	0.0921174	0.00839883	0.0135093	0.0373031	0.0373031	0.73093
ENST00000480753	ENSG00000138434	SSFA2	0.000119732	0.0033781	0.50742	0.131911	6.011	0.0826965	0.00351565	0.00713868	0.0312855	0.0312855	0.732051
ENST00000352689	ENSG00000128585	MKLN1	9.33954e-07	4.44731e-05	0.507471	0.103459	7.52601	0.0799385	0.00104025	0.00637911	0.0203671	0.0203671	0.732125
ENST00000379046	ENSG00000181019	NQO1	1.36898e-05	0.000501341	0.508514	0.116933	8.90856	0.0876086	0.000973778	0.0150409	0.0263727	0.0263727	0.73363
ENST00000357903	ENSG00000142192	APP	0.000161612	0.00441794	0.508942	0.134908	8.67617	0.105207	0.00198223	0.0344182	0.0241784	0.0344182	0.734248
ENST00000453505	ENSG00000240849	TMEM189	0.00105263	0.0218841	0.510261	0.155754	6.15736	0.0892931	0.0194648	-0.00207842	0.029054	0.029054	0.736151
ENST00000371065	ENSG00000213625	LEPROT	1.10612e-06	5.19344e-05	0.510334	0.104754	7.68831	0.0830692	0.00163796	0.00846247	0.0203087	0.0203087	0.736256
ENST00000310823	ENSG00000151694	ADAM17	1.08431e-05	0.000408128	0.510801	0.116101	7.50631	0.0976555	0.000756647	0.0262021	0.0203865	0.0262021	0.73693
ENST00000421367	ENSG00000107566	ERLIN1	6.64708e-07	3.27579e-05	0.512229	0.103035	7.54355	0.0813977	0.000880443	0.00662419	0.020352	0.020352	0.738989
ENST00000570311	ENSG00000263142	LRRC37A17P	0.00148531	0.0292454	0.512453	0.161274	5.466	0.0773918	0.00666911	-0.00391475	0.0453493	0.0453493	0.739313
ENST00000393360	ENSG00000050748	MAPK9	7.22681e-05	0.00217488	0.512944	0.129248	6.81806	0.0785718	0.0105794	-0.0066161	0.0228305	0.0228305	0.740021
ENST00000247194	ENSG00000126790	L3HYPDH	0.000231078	0.00601808	0.513024	0.139319	5.85867	0.0837133	0.00466469	0.00526948	0.034155	0.034155	0.740137
ENST00000381346	ENSG00000072042	RDH11	6.6456e-06	0.000263771	0.513098	0.113902	7.682	0.0974603	0.00147946	0.0244678	0.0203076	0.0244678	0.740243
ENST00000502346	ENSG00000174695	TMEM167A	1.38865e-06	6.37059e-05	0.51352	0.106393	8.36871	0.0841993	0.000519626	0.00981213	0.0221193	0.0221193	0.740852
ENST00000376352	ENSG00000166263	STXBP4	0.000502168	0.0116729	0.514028	0.147726	5.68034	0.0960431	0.00521157	0.018764	0.0384345	0.0384345	0.741584
ENST00000583313	ENSG00000265241	RBM8A	7.80585e-07	3.77271e-05	0.515316	0.104312	7.32995	0.0889202	0.00108066	0.0141427	0.0206812	0.0206812	0.743443
ENST00000380455	ENSG00000124588	NQO2	5.30343e-06	0.000215683	0.515681	0.113276	6.69052	0.0871629	0.00196681	0.0110809	0.0236963	0.0236963	0.74397
ENST00000308234	ENSG00000174136	RGMB	0.000402891	0.00966383	0.516587	0.146004	5.93909	0.0908641	0.010072	0.0069819	0.032562	0.032562	0.745277
ENST00000419036	ENSG00000033867	SLC4A7	5.21615e-05	0.00163898	0.516626	0.127697	7.35691	0.0816902	0.0119909	-0.00565308	0.020622	0.020622	0.745333
ENST00000361564	ENSG00000198856	OSTC	9.97038e-07	4.73108e-05	0.518306	0.105945	7.55643	0.0959962	0.000809488	0.0216391	0.0203423	0.0216391	0.747757
ENST00000342907	ENSG00000157350	ST3GAL2	4.7565e-06	0.000195499	0.518918	0.113419	6.76831	0.0955576	0.00257636	0.0191488	0.0231512	0.0231512	0.74864
ENST00000401867	ENSG00000072682	P4HA2	0.000451391	0.0106722	0.519982	0.148225	5.85355	0.0920193	0.00967838	0.0075505	0.0342629	0.0342629	0.750174
ENST00000238856	ENSG00000119844	AFTPH	3.03398e-06	0.000130311	0.520515	0.111495	7.07029	0.0843123	0.00334204	0.00471044	0.0215202	0.0215202	0.750943
ENST00000359213	ENSG00000121578	B4GALT4	2.68573e-05	0.000911117	0.521468	0.124201	6.77317	0.0963461	0.0077327	0.014028	0.0231189	0.0231189	0.752319
ENST00000366661	ENSG00000143643	TTC13	2.41643e-05	0.00083142	0.521803	0.123578	6.41234	0.0902092	0.00447059	0.010014	0.0260724	0.0260724	0.752802
ENST00000262719	ENSG00000081913	PHLPP1	1.2087e-06	5.59814e-05	0.521814	0.107497	7.01727	0.0972409	0.00135779	0.0213267	0.0217535	0.0217535	0.752818
ENST00000393640	ENSG00000157350	ST3GAL2	0.000739949	0.016194	0.52451	0.155441	5.69638	0.0954736	0.0103222	0.00936023	0.0380017	0.0380017	0.756707
ENST00000259253	ENSG00000136731	UGGT1	3.20981e-06	0.0001373	0.525088	0.112754	8.75879	0.0944245	0.000537138	0.017719	0.02489	0.02489	0.757541
ENST00000406875	ENSG00000064393	HIPK2	2.66549e-05	0.000907888	0.526352	0.125313	7.00564	0.106076	0.00145037	0.0299561	0.0218076	0.0299561	0.759365
ENST00000343638	ENSG00000108312	UBTF	1.64395e-05	0.000589198	0.528036	0.122558	6.78389	0.105413	0.00606132	0.0239795	0.0230484	0.0239795	0.761794
ENST00000337435	ENSG00000170113	NIPA1	3.17022e-07	1.66795e-05	0.528604	0.103384	7.55538	0.0835289	0.0010333	0.00327635	0.020343	0.020343	0.762614
ENST00000379426	ENSG00000205269	TMEM170B	0.000392003	0.00943274	0.529772	0.149425	5.63257	0.101635	0.00486825	0.0201535	0.0397873	0.0397873	0.764299
ENST00000357480	ENSG00000082641	NFE2L1	8.76101e-06	0.000337448	0.530048	0.119227	8.24288	0.0984068	0.00691219	0.0142454	0.0215182	0.0215182	0.764697
ENST00000614999	ENSG00000270629	NBPF14	0.000800773	0.0173224	0.530084	0.158115	6.3894	0.0906673	0.0236977	-0.0115823	0.026303	0.026303	0.76475
ENST00000251020	ENSG00000103449	SALL1	0.000104651	0.0030103	0.53249	0.137256	6.31154	0.113309	0.00805904	0.0296193	0.0271362	0.0296193	0.768221
ENST00000276461	ENSG00000147475	ERLIN2	2.76828e-07	1.46788e-05	0.533453	0.103813	7.3792	0.0952718	0.000977434	0.0153158	0.020577	0.020577	0.769609
ENST00000273047	ENSG00000144566	RAB5A	1.18969e-06	5.52448e-05	0.53417	0.109972	6.97553	0.0890074	0.00223486	0.00649459	0.0219526	0.0219526	0.770644
ENST00000308488	ENSG00000048649	RSF1	1.9533e-06	8.69583e-05	0.534507	0.112334	6.89555	0.100058	0.00286486	0.0186365	0.022373	0.022373	0.77113
ENST00000622772	ENSG00000276935	MBOAT7	0.000686302	0.0151933	0.534745	0.15751	5.63304	0.100862	0.00984498	0.0125101	0.0397737	0.0397737	0.771473
ENST00000610921	ENSG00000273592	MBOAT7	0.000686302	0.0151933	0.534745	0.15751	5.63304	0.100862	0.00984498	0.0125101	0.0397737	0.0397737	0.771473
ENST00000533601	ENSG00000139998	RAB15	0.000163694	0.00446945	0.53514	0.141973	7.13682	0.116375	0.0136889	0.0266236	0.0212578	0.0266236	0.772043
ENST00000370898	ENSG00000254685	FPGT	8.66671e-07	4.1591e-05	0.535353	0.108818	6.9527	0.0953897	0.00161525	0.0141384	0.0220673	0.0220673	0.772351
ENST00000333449	ENSG00000185475	TMEM179B	8.18742e-05	0.0024273	0.535477	0.135948	6.2768	0.113607	0.00319824	0.0337653	0.0275351	0.0337653	0.772529
ENST00000265735	ENSG00000127990	SGCE	1.14383e-06	5.33524e-05	0.538643	0.110715	7.27271	0.0989344	0.00369176	0.0150196	0.0208239	0.0208239	0.777097
ENST00000396861	ENSG00000111640	GAPDH	0.000997248	0.0209385	0.539876	0.164031	7.68638	0.105541	0.0335041	-0.00752806	0.0203083	0.0203083	0.778876
ENST00000429644	ENSG00000114480	GBE1	0.000174982	0.00473374	0.540021	0.143904	6.04763	0.0850409	0.0107332	-0.00872647	0.0306837	0.0306837	0.779085
ENST00000370132	ENSG00000137992	DBT	5.90962e-06	0.000237906	0.540099	0.119238	6.44333	0.106208	0.00266472	0.0240089	0.0257706	0.0257706	0.779198
ENST00000484302	ENSG00000108511	HOXB6	0.000983162	0.0207005	0.542524	0.164636	5.66449	0.093036	0.0153371	-0.00490603	0.0388727	0.0388727	0.782697
ENST00000258729	ENSG00000136231	IGF2BP3	1.88343e-06	8.41801e-05	0.542884	0.113919	8.1019	0.106454	0.00176041	0.0241945	0.0209953	0.0241945	0.783216
ENST00000277900	ENSG00000148700	ADD3	3.56871e-05	0.00117362	0.543041	0.131367	7.79672	0.113839	0.000921228	0.0335934	0.0203713	0.0335934	0.783442
ENST00000234827	ENSG00000116205	TCEANC2	1.94493e-05	0.000685564	0.543048	0.127144	6.1729	0.107662	0.0034889	0.0238169	0.0288423	0.0288423	0.783452
ENST00000254351	ENSG00000115884	SDC1	3.01545e-05	0.00101383	0.543469	0.130257	7.67672	0.113474	0.00123241	0.0327012	0.0203068	0.0327012	0.78406
ENST00000443585	ENSG00000235162	C12orf75	2.59437e-06	0.000113118	0.543549	0.115635	6.80447	0.0948308	0.00382682	0.00832724	0.022916	0.022916	0.784175
ENST00000230048	ENSG00000112304	ACOT13	5.98029e-05	0.00184737	0.544578	0.135684	5.9608	0.09789	0.00465729	0.0106925	0.0321628	0.0321628	0.78566
ENST00000324607	ENSG00000172197	MBOAT1	2.42516e-05	0.000833813	0.544892	0.129071	6.08623	0.101305	0.00323659	0.0159838	0.0300819	0.0300819	0.786112
ENST00000155926	ENSG00000071575	TRIB2	2.49534e-05	0.000854663	0.545827	0.129489	8.00953	0.113866	0.00148352	0.0320515	0.020735	0.0320515	0.787461
ENST00000265028	ENSG00000090520	DNAJB11	1.28649e-07	7.25328e-06	0.545849	0.103366	8.03223	0.0948121	0.000575801	0.0107213	0.0207931	0.0207931	0.787493
ENST00000266712	ENSG00000139324	TMTC3	1.14571e-06	5.33928e-05	0.547563	0.112556	6.72568	0.107382	0.00166809	0.0236696	0.0234432	0.0236696	0.789965
ENST00000542230	ENSG00000142188	TMEM50B	0.000230079	0.00600253	0.54951	0.149183	5.60868	0.103314	0.0040096	0.0158692	0.0405013	0.0405013	0.792774
ENST00000573374	ENSG00000263160	TMEM50B	0.000230079	0.00600253	0.54951	0.149183	5.60868	0.103314	0.0040096	0.0158692	0.0405013	0.0405013	0.792774
ENST00000300853	ENSG00000012061	ERCC1	0.000109589	0.00313501	0.551119	0.14247	6.16164	0.118288	0.0116001	0.0251589	0.0289952	0.0289952	0.795096
ENST00000369026	ENSG00000143384	MCL1	3.32615e-06	0.000141828	0.551156	0.118539	8.23333	0.110881	0.00356826	0.0245347	0.0214778	0.0245347	0.795149
ENST00000531380	ENSG00000174804	FZD4	0.000168417	0.00458692	0.551825	0.146676	5.70773	0.0893622	0.00532587	-0.00257365	0.0377017	0.0377017	0.796115
ENST00000396594	ENSG00000159921	GNE	1.89093e-07	1.03592e-05	0.552357	0.106024	7.38984	0.0917282	0.00192537	0.0033913	0.0205567	0.0205567	0.796883
ENST00000310430	ENSG00000173273	TNKS	7.92882e-08	4.70126e-06	0.553722	0.103138	7.48103	0.0972195	0.00085953	0.0103604	0.0204154	0.0204154	0.798852
ENST00000265729	ENSG00000075142	SRI	3.00331e-05	0.00101025	0.55453	0.132878	6.86613	0.118127	0.00430466	0.0310087	0.0225408	0.0310087	0.800018
ENST00000554752	ENSG00000006432	MAP3K9	0.000331654	0.0081574	0.554593	0.154516	6.39975	0.103697	0.021552	-0.00309615	0.0261982	0.0261982	0.800107
ENST00000264982	ENSG00000114107	CEP70	0.000122412	0.00344652	0.555974	0.144738	6.04383	0.116051	0.0111536	0.0212039	0.0307446	0.0307446	0.802101
ENST00000629438	ENSG00000114956	DGUOK	0.000137005	0.00382086	0.557249	0.146125	7.21955	0.125326	0.00227833	0.0404266	0.0209776	0.0404266	0.80394
ENST00000434821	ENSG00000115170	ACVR1	2.72336e-07	1.4452e-05	0.557622	0.108452	7.2611	0.0992845	0.00266796	0.00951634	0.0208557	0.0208557	0.804479
ENST00000367942	ENSG00000118217	ATF6	7.53024e-08	4.48457e-06	0.557923	0.103741	7.36926	0.0937492	0.000927798	0.00468681	0.0205966	0.0205966	0.804912
ENST00000282406	ENSG00000152527	PLEKHH2	5.66895e-05	0.00176164	0.558052	0.138606	5.93296	0.106249	0.00574591	0.0144039	0.0326771	0.0326771	0.805098
ENST00000274457	ENSG00000145780	FEM1C	1.98901e-05	0.000699645	0.561586	0.131639	7.59905	0.119815	0.000750615	0.0339069	0.0203183	0.0339069	0.810197
ENST00000261326	ENSG00000075643	MOCOS	5.36842e-07	2.70672e-05	0.562251	0.112166	6.72637	0.107311	0.00172422	0.0180965	0.0234383	0.0234383	0.811156
ENST00000521381	ENSG00000145675	PIK3R1	3.67276e-05	0.0011991	0.562486	0.136289	8.25727	0.12224	0.00049124	0.0366582	0.0215803	0.0366582	0.811496
ENST00000305997	ENSG00000143797	MBOAT2	0.00011354	0.00322758	0.563851	0.146088	7.51832	0.127422	0.0010162	0.0416671	0.0203744	0.0416671	0.813464
ENST00000217971	ENSG00000101856	PGRMC1	5.43272e-08	3.31411e-06	0.564906	0.103909	7.51581	0.103067	0.00121744	0.0126548	0.0203768	0.0203768	0.814986
ENST00000372410	ENSG00000148358	GPR107	3.01855e-05	0.00101433	0.566526	0.13579	7.15982	0.114484	0.0157032	0.0108781	0.0211748	0.0211748	0.817323
ENST00000362042	ENSG00000082641	NFE2L1	6.71983e-05	0.00204045	0.567099	0.142273	7.62873	0.125845	0.0201742	0.0194446	0.020309	0.020309	0.81815
ENST00000605930	ENSG00000096433	ITPR3	2.44973e-07	1.32069e-05	0.567431	0.109935	8.03261	0.112712	0.000831452	0.02334	0.0207941	0.02334	0.818629
ENST00000303714	ENSG00000169604	ANTXR1	3.27902e-08	2.10258e-06	0.567463	0.102693	7.92248	0.107339	0.000544486	0.0173458	0.020547	0.020547	0.818676
ENST00000360535	ENSG00000105270	CLIP3	9.16714e-06	0.000351293	0.568923	0.128253	6.1099	0.114811	0.003169	0.022886	0.0297287	0.0297287	0.820781
ENST00000296181	ENSG00000082781	ITGB5	3.58269e-05	0.00117674	0.569238	0.137734	7.83698	0.125102	0.00126677	0.0366747	0.0204154	0.0366747	0.821236
ENST00000605786	ENSG00000138036	DYNC2LI1	5.89479e-05	0.00182429	0.569992	0.141896	6.10987	0.115229	0.0105396	0.0155976	0.029729	0.029729	0.822324
ENST00000480824	ENSG00000198663	C6orf89	5.66232e-06	0.00022863	0.570008	0.12559	7.02654	0.11987	0.00187096	0.029675	0.0217112	0.029675	0.822347
ENST00000474473	ENSG00000163565	IFI16	1.60323e-05	0.000576526	0.570424	0.132226	7.13174	0.122939	0.00176629	0.0332012	0.0212767	0.0332012	0.822947
ENST00000366577	ENSG00000116984	MTR	3.59321e-05	0.00117881	0.570496	0.138061	7.32836	0.123484	0.017437	0.0181396	0.0206848	0.0206848	0.823051
ENST00000336735	ENSG00000071537	SEL1L	3.90004e-08	2.46059e-06	0.571762	0.104045	8.19396	0.100933	0.000331695	0.00845257	0.0213191	0.0213191	0.824878
ENST00000372004	ENSG00000124151	NCOA3	0.000168295	0.00458581	0.571918	0.152009	6.36684	0.133066	0.00403669	0.0421769	0.0265362	0.0421769	0.825103
ENST00000261534	ENSG00000009830	POMT2	3.81664e-05	0.00124308	0.572168	0.138933	6.12577	0.109533	0.00910644	0.0095565	0.0294981	0.0294981	0.825463
ENST00000280551	ENSG00000150961	SEC24D	3.37131e-05	0.00111629	0.572601	0.138082	6.79192	0.126363	0.00574599	0.0323873	0.0229963	0.0323873	0.826088
ENST00000373824	ENSG00000120656	TAF12	0.000192614	0.00516125	0.572861	0.153643	5.75359	0.115755	0.0106734	0.0149838	0.0365392	0.0365392	0.826463
ENST00000297107	ENSG00000164574	GALNT10	1.08249e-07	6.1803e-06	0.573027	0.107868	7.04664	0.101024	0.00164944	0.00675885	0.0216216	0.0216216	0.826703
ENST00000398136	ENSG00000152558	TMEM123	0.000155768	0.00428413	0.573171	0.151565	7.95661	0.133245	0.00900647	0.0369373	0.0206142	0.0369373	0.82691
ENST00000487273	ENSG00000168615	ADAM9	2.70565e-07	1.43805e-05	0.57661	0.112118	8.75704	0.112884	0.000266888	0.0206051	0.0248741	0.0248741	0.831872
ENST00000450852	ENSG00000164172	MOCS2	2.01017e-08	1.34235e-06	0.577254	0.102877	7.76243	0.102651	0.000824633	0.00786097	0.0203426	0.0203426	0.832801
ENST00000515209	ENSG00000169223	LMAN2	7.64526e-06	0.000298033	0.577544	0.129063	6.82143	0.115195	0.0105052	0.012703	0.0228095	0.0228095	0.833219
ENST00000418976	ENSG00000175854	SWI5	0.000376317	0.00911032	0.578019	0.16254	5.49337	0.120981	0.00850333	0.0212723	0.0443353	0.0443353	0.833904
ENST00000373212	ENSG00000131171	SH3BGRL	4.81212e-06	0.000197361	0.579189	0.126659	6.57801	0.123347	0.00235648	0.0297286	0.0245753	0.0297286	0.835593
ENST00000256545	ENSG00000134153	EMC7	2.64098e-07	1.40921e-05	0.579231	0.112528	7.58559	0.117567	0.000939917	0.0243854	0.0203245	0.0243854	0.835652
ENST00000483386	ENSG00000176273	SLC35G1	0.000833613	0.0179309	0.580018	0.173586	5.31517	0.114161	0.0083764	0.0126712	0.0518878	0.0518878	0.836788
ENST00000175091	ENSG00000068697	LAPTM4A	7.47279e-08	4.46213e-06	0.581329	0.108065	8.52684	0.114391	0.000288305	0.0205199	0.023068	0.023068	0.83868
ENST00000356401	ENSG00000177479	ARIH2	6.25162e-06	0.000249597	0.582514	0.128941	7.26199	0.125451	0.00146231	0.031789	0.0208533	0.031789	0.84039
ENST00000289119	ENSG00000158201	ABHD3	6.76766e-06	0.000267988	0.582831	0.129493	6.23225	0.106774	0.00546328	0.0058758	0.0280737	0.0280737	0.840847
ENST00000261416	ENSG00000049860	HEXB	9.66597e-08	5.6037e-06	0.583119	0.109344	8.56824	0.115396	0.000558025	0.0207279	0.0233541	0.0233541	0.841262
ENST00000256015	ENSG00000133639	BTG1	6.8714e-05	0.00207809	0.58462	0.146864	6.70957	0.134627	0.00175947	0.0413785	0.0235578	0.0413785	0.843428
ENST00000515859	ENSG00000104723	TUSC3	6.38842e-05	0.00195383	0.585249	0.146386	6.5685	0.134597	0.00903111	0.0338267	0.0246541	0.0338267	0.844336
ENST00000552695	ENSG00000198855	FICD	0.000316632	0.00786504	0.58536	0.162541	5.46006	0.107093	0.0072645	0.00346238	0.0455749	0.0455749	0.844496
ENST00000366844	ENSG00000154380	ENAH	5.1179e-05	0.00161335	0.585595	0.144585	7.64366	0.133814	0.00103243	0.0407772	0.0203066	0.0407772	0.844834
ENST00000357037	ENSG00000177469	CAVIN1	0.000111438	0.00317986	0.585672	0.151562	7.94951	0.137382	0.00048439	0.0454578	0.0205995	0.0454578	0.844945
ENST00000319041	ENSG00000142669	SH3BGRL3	7.65047e-05	0.00229017	0.58582	0.148118	6.89131	0.135663	0.00339726	0.0404806	0.0223967	0.0404806	0.845159
ENST00000406452	ENSG00000176623	RMDN1	1.44724e-07	8.08556e-06	0.587538	0.111717	6.86043	0.108714	0.00238748	0.0093779	0.0225741	0.0225741	0.847638
ENST00000320560	ENSG00000177119	ANO6	3.22906e-06	0.000137949	0.587693	0.126231	7.54987	0.125997	0.00172676	0.0301419	0.0203471	0.0301419	0.847861
ENST00000455123	ENSG00000105854	PON2	3.64647e-05	0.00119282	0.589268	0.142721	7.22172	0.134129	0.0057478	0.0349908	0.0209709	0.0349908	0.850133
ENST00000548336	ENSG00000235162	C12orf75	0.00012973	0.00363743	0.589729	0.154098	6.42388	0.140074	0.00587817	0.0416143	0.0259587	0.0416143	0.850799
ENST00000264963	ENSG00000114988	LMAN2L	4.91923e-08	3.02814e-06	0.59014	0.108199	7.15123	0.118279	0.00220875	0.0196956	0.0212053	0.0212053	0.851392
ENST00000305097	ENSG00000169860	P2RY1	2.2031e-05	0.000766196	0.590537	0.139171	5.84921	0.131906	0.00438213	0.0332633	0.034355	0.034355	0.851964
ENST00000258229	ENSG00000135749	PCNX2	0.000170619	0.00463423	0.59069	0.157142	5.57312	0.140843	0.00777429	0.0402383	0.0416127	0.0416127	0.852185
ENST00000216484	ENSG00000100596	SPTLC2	4.67788e-06	0.000192907	0.591235	0.129126	7.00458	0.128457	0.00171654	0.0316306	0.0218126	0.0316306	0.852971
ENST00000346798	ENSG00000142192	APP	1.84914e-05	0.000654867	0.592068	0.138257	8.91865	0.132924	0.00116274	0.0370674	0.026482	0.0370674	0.854174
ENST00000433351	ENSG00000116005	PCYOX1	2.25137e-08	1.4772e-06	0.592831	0.106024	8.33206	0.115617	0.000551493	0.0171851	0.0219307	0.0219307	0.855274
ENST00000422906	ENSG00000104343	UBE2W	0.0001103	0.00315271	0.595636	0.154041	6.04187	0.142044	0.00894151	0.0385158	0.0307762	0.0385158	0.859321
ENST00000367926	ENSG00000117143	UAP1	3.38942e-05	0.00112064	0.596015	0.143771	7.02064	0.13693	0.00639008	0.03495	0.021738	0.03495	0.859867
ENST00000309295	ENSG00000173442	EHBP1L1	1.86929e-08	1.25571e-06	0.596825	0.106127	7.24583	0.111336	0.00162683	0.00953145	0.0208991	0.0208991	0.861035
ENST00000301919	ENSG00000170903	MSANTD4	3.90276e-08	2.46059e-06	0.598849	0.108977	7.31615	0.122822	0.000967464	0.0227844	0.0207135	0.0227844	0.863956
ENST00000477853	ENSG00000127463	EMC1	2.63113e-08	1.7049e-06	0.599474	0.107734	7.97309	0.110389	0.0025638	0.00643425	0.0206496	0.0206496	0.864857
ENST00000310958	ENSG00000260916	CCPG1	2.84291e-05	0.00096203	0.600608	0.143491	6.18475	0.138362	0.00752781	0.0336513	0.028684	0.0336513	0.866494
ENST00000367042	ENSG00000117335	CD46	5.29291e-06	0.000215384	0.601642	0.132147	7.23402	0.121191	0.0139918	0.00674021	0.0209337	0.0209337	0.867985
ENST00000371217	ENSG00000119977	TCTN3	5.64109e-09	4.12946e-07	0.602575	0.10341	7.59781	0.120611	0.00106831	0.0186124	0.0203188	0.0203188	0.869331
ENST00000371959	ENSG00000126016	AMOT	2.30826e-05	0.000797853	0.602654	0.142378	6.61433	0.138076	0.016262	0.0237625	0.024281	0.024281	0.869445
ENST00000392783	ENSG00000123636	BAZ2B	3.75561e-06	0.000158247	0.603261	0.13045	6.90563	0.119651	0.0117171	0.00656759	0.0223171	0.0223171	0.870321
ENST00000262715	ENSG00000129566	TEP1	7.98463e-05	0.00237445	0.603537	0.152993	6.36376	0.113822	0.0202453	-0.00887199	0.0265685	0.0265685	0.870719
ENST00000013125	ENSG00000012983	MAP4K5	2.1031e-05	0.000736717	0.603995	0.141994	7.11687	0.138796	0.00129446	0.0390304	0.021333	0.0390304	0.87138
ENST00000422003	ENSG00000154114	TBCEL	1.33171e-05	0.000489277	0.604367	0.138781	6.0956	0.1096	0.00857962	-0.00246647	0.0299407	0.0299407	0.871917
ENST00000483207	ENSG00000159445	THEM4	4.2153e-05	0.00135596	0.607499	0.148339	5.79678	0.132294	0.00849416	0.022831	0.0355145	0.0355145	0.876435
ENST00000304363	ENSG00000110066	KMT5B	0.000255304	0.00654724	0.60771	0.166183	5.74293	0.125578	0.018431	0.00497291	0.0368024	0.0368024	0.87674
ENST00000368488	ENSG00000111860	CEP85L	8.37244e-06	0.000323586	0.609091	0.136707	6.65238	0.138036	0.00748506	0.0298928	0.0239834	0.0298928	0.878732
ENST00000258530	ENSG00000136044	APPL2	4.33421e-08	2.69745e-06	0.609121	0.111221	7.08471	0.122971	0.00327978	0.016511	0.0214605	0.0214605	0.878775
ENST00000283206	ENSG00000153214	TMEM87B	1.14613e-05	0.000429059	0.609939	0.139014	8.05415	0.139422	0.000447442	0.0382026	0.0208528	0.0382026	0.879955
ENST00000304743	ENSG00000100731	PCNX1	4.01795e-08	2.52148e-06	0.610775	0.111251	6.92598	0.119376	0.00254667	0.0123762	0.0222069	0.0222069	0.881162
ENST00000619301	ENSG00000152242	C18orf25	3.91319e-06	0.000163766	0.610909	0.132348	6.99462	0.136658	0.00411121	0.0309206	0.0218598	0.0309206	0.881354
ENST00000370253	ENSG00000137942	FNBP1L	5.18137e-06	0.000211353	0.611334	0.134144	7.0523	0.137627	0.00253267	0.0334563	0.0215969	0.0334563	0.881967
ENST00000222572	ENSG00000105854	PON2	1.39608e-08	9.56563e-07	0.611341	0.107747	7.88984	0.122863	0.00272809	0.0160333	0.0204906	0.0204906	0.881978
ENST00000295702	ENSG00000163479	SSR2	5.01225e-06	0.000204948	0.61136	0.133945	8.20628	0.137545	0.000427857	0.0354545	0.0213675	0.0354545	0.882006
ENST00000256495	ENSG00000134107	BHLHE40	2.19403e-09	1.71751e-07	0.611548	0.102219	7.80477	0.114248	0.000518076	0.00810726	0.0203792	0.0203792	0.882276
ENST00000370763	ENSG00000162616	DNAJB4	0.000165241	0.00450804	0.612111	0.162494	6.55933	0.152316	0.00236114	0.0504476	0.0247309	0.0504476	0.883089
ENST00000475723	ENSG00000011295	TTC19	4.45497e-05	0.00142425	0.612513	0.150033	7.43023	0.145781	0.00320589	0.041814	0.020487	0.041814	0.883669
ENST00000230461	ENSG00000112697	TMEM30A	1.66652e-08	1.13071e-06	0.613056	0.108631	8.37394	0.120137	0.00145416	0.0134265	0.0221472	0.0221472	0.884452
ENST00000379253	ENSG00000130066	SAT1	6.5126e-08	3.91641e-06	0.614213	0.113656	6.71691	0.124237	0.0023303	0.0168605	0.0235053	0.0235053	0.886122
ENST00000273317	ENSG00000144791	LIMD1	7.79153e-05	0.00232931	0.615017	0.155672	8.31333	0.149614	0.000337326	0.0481302	0.0218386	0.0481302	0.887281
ENST00000474223	ENSG00000130066	SAT1	2.17729e-07	1.18704e-05	0.615854	0.11881	7.17419	0.132563	0.00144128	0.0267902	0.021125	0.0267902	0.888488
ENST00000369287	ENSG00000165813	CCDC186	1.09231e-07	6.22591e-06	0.616697	0.116124	6.55271	0.115393	0.002183	0.00567058	0.0247868	0.0247868	0.889705
ENST00000272227	ENSG00000143870	PDIA6	1.5982e-05	0.00057594	0.619044	0.143473	9.75734	0.129234	7.38579e-05	0.0229606	0.0410953	0.0410953	0.893092
ENST00000273859	ENSG00000145246	ATP10D	4.98049e-06	0.000203773	0.619308	0.135646	6.53711	0.141126	0.00607968	0.0307202	0.02492	0.0307202	0.893472
ENST00000229266	ENSG00000111666	CHPT1	1.65073e-06	7.48666e-05	0.620096	0.129401	7.81089	0.138567	0.00152258	0.0319664	0.0203855	0.0319664	0.894609
ENST00000379047	ENSG00000181019	NQO1	1.14297e-05	0.000428302	0.621064	0.141531	9.50874	0.144545	0.000253622	0.0398083	0.0354228	0.0398083	0.896006
ENST00000604000	ENSG00000271601	LIX1L	1.54501e-08	1.05461e-06	0.622512	0.110053	6.90173	0.131483	0.00147187	0.0227514	0.0223387	0.0227514	0.898095
ENST00000304661	ENSG00000171155	C1GALT1C1	6.32561e-06	0.000251957	0.6226	0.13789	6.07851	0.13038	0.00782749	0.0150724	0.0301997	0.0301997	0.898222
ENST00000326587	ENSG00000179222	MAGED1	9.66235e-08	5.6037e-06	0.622716	0.116767	8.40521	0.134167	0.00110365	0.0261656	0.0223186	0.0261656	0.898389
ENST00000539319	ENSG00000137831	UACA	8.84724e-08	5.19578e-06	0.622816	0.116437	7.44022	0.130073	0.00664379	0.0158082	0.0204715	0.0204715	0.898532
ENST00000405358	ENSG00000006468	ETV1	8.22886e-07	3.96302e-05	0.62384	0.126543	7.07247	0.123349	0.0105153	0.00366651	0.021511	0.021511	0.90001
ENST00000409829	ENSG00000169604	ANTXR1	3.81178e-09	2.85201e-07	0.624511	0.10599	7.227	0.127242	0.001513	0.0169309	0.0209548	0.0209548	0.900978
ENST00000266458	ENSG00000139112	GABARAPL1	1.02883e-06	4.86488e-05	0.62484	0.127883	6.71327	0.134185	0.00917663	0.0172307	0.0235313	0.0235313	0.901453
ENST00000479870	ENSG00000198420	TCAF1	1.69705e-09	1.3567e-07	0.625752	0.103869	8.16256	0.12632	0.000376217	0.0164753	0.0212013	0.0212013	0.902769
ENST00000449141	ENSG00000125868	DSTN	2.15459e-06	9.54803e-05	0.626214	0.132158	6.75459	0.141982	0.00270556	0.0322261	0.0232434	0.0322261	0.903435
ENST00000396148	ENSG00000123080	CDKN2C	5.613e-05	0.00174619	0.626242	0.155452	6.59062	0.153478	0.00435091	0.0439799	0.0244718	0.0439799	0.903476
ENST00000264409	ENSG00000138678	GPAT3	0.00010887	0.00312238	0.627507	0.16215	7.98344	0.157577	0.00745541	0.0451297	0.0206729	0.0451297	0.905301
ENST00000367975	ENSG00000143252	SDHC	4.62666e-08	2.85639e-06	0.627711	0.114858	6.62784	0.123598	0.00221069	0.0106466	0.0241741	0.0241741	0.905594
ENST00000274811	ENSG00000146083	RNF44	0.000157131	0.00431637	0.630154	0.166729	6.42955	0.16111	0.00247403	0.0531228	0.0259034	0.0531228	0.909119
ENST00000372841	ENSG00000196968	FUT11	1.2752e-06	5.89003e-05	0.630374	0.130146	6.13308	0.117772	0.00448255	0.000460824	0.0293936	0.0293936	0.909437
ENST00000372037	ENSG00000107779	BMPR1A	1.04773e-09	8.67296e-08	0.630789	0.103375	7.40577	0.130263	0.00084488	0.0184963	0.0205278	0.0205278	0.910036
ENST00000343600	ENSG00000139793	MBNL2	0.000134799	0.00376553	0.631585	0.165444	7.61915	0.160894	0.00853991	0.0462033	0.0203113	0.0462033	0.911183
ENST00000446916	ENSG00000088812	ATRN	5.74494e-06	0.00023169	0.631608	0.139257	6.68634	0.147224	0.00455753	0.0342273	0.0237272	0.0342273	0.911217
ENST00000370625	ENSG00000117151	CTBS	5.2134e-05	0.00163898	0.631918	0.156189	5.61345	0.121446	0.00843362	0.000146492	0.0403566	0.0403566	0.911665
ENST00000284878	ENSG00000154639	CXADR	5.38653e-06	0.000218799	0.631972	0.138921	5.99757	0.147195	0.00425677	0.0343415	0.0315141	0.0343415	0.911743
ENST00000267890	ENSG00000128881	TTBK2	1.20546e-06	5.58696e-05	0.636462	0.131101	6.03186	0.138126	0.00343599	0.0226832	0.030939	0.030939	0.918219
ENST00000615790	ENSG00000242265	PEG10	0.000118523	0.00334955	0.636703	0.165413	10.1656	0.133147	0.000797373	0.0194104	0.0539258	0.0539258	0.918567
ENST00000443035	ENSG00000174485	DENND4A	5.27389e-05	0.00165559	0.637538	0.157684	5.74946	0.141536	0.0130876	0.0165529	0.0366406	0.0366406	0.919772
ENST00000263265	ENSG00000105559	PLEKHA4	5.09797e-10	4.44843e-08	0.637706	0.10259	7.7171	0.127875	0.000732083	0.0128993	0.0203174	0.0203174	0.920014
ENST00000415149	ENSG00000114439	BBX	4.45157e-10	3.9351e-08	0.639392	0.102511	7.7921	0.119164	0.000650024	0.00210076	0.0203669	0.0203669	0.922447
ENST00000377126	ENSG00000119138	KLF9	1.10812e-07	6.30541e-06	0.639801	0.120534	7.01196	0.141862	0.00128399	0.0277731	0.0217781	0.0277731	0.923038
ENST00000375749	ENSG00000101346	POFUT1	6.95284e-10	5.95946e-08	0.639999	0.103775	8.13551	0.118606	0.00043267	0.00140753	0.021106	0.021106	0.923323
ENST00000262455	ENSG00000023318	ERP44	2.55851e-08	1.65943e-06	0.641143	0.115122	7.60621	0.140167	0.000655443	0.0258508	0.0203155	0.0258508	0.924974
ENST00000374379	ENSG00000169504	CLIC4	2.57639e-06	0.000112407	0.64354	0.136865	9.59946	0.136824	0.000129067	0.0214515	0.0373352	0.0373352	0.928431
ENST00000268042	ENSG00000140450	ARRDC4	7.15108e-10	6.1062e-08	0.643563	0.104429	7.38339	0.13703	0.000818854	0.0209918	0.0205689	0.0209918	0.928464
ENST00000274496	ENSG00000145817	YIPF5	1.06588e-07	6.10608e-06	0.644926	0.121338	6.87121	0.14125	0.00693459	0.0192134	0.0225113	0.0225113	0.930431
ENST00000475243	ENSG00000124164	VAPB	3.24441e-10	2.94489e-08	0.6471	0.102933	7.61733	0.126217	0.000878436	0.00679537	0.0203119	0.0203119	0.933567
ENST00000246166	ENSG00000257365	FNTB	3.03815e-09	2.3063e-07	0.64715	0.10914	7.2189	0.127367	0.00284367	0.0061503	0.0209796	0.0209796	0.93364
ENST00000247020	ENSG00000132581	SDF2	4.75805e-06	0.000195499	0.64731	0.141483	6.04216	0.147249	0.00926328	0.0228569	0.0307716	0.0307716	0.933871
ENST00000611847	ENSG00000204186	ZDBF2	0.000164614	0.00449276	0.648414	0.172088	6.7458	0.147981	0.0359253	-0.00342814	0.0233034	0.0233034	0.935463
ENST00000326505	ENSG00000176597	B3GNT5	5.17245e-05	0.00162903	0.64868	0.160259	6.44212	0.164253	0.00310157	0.0482645	0.0257821	0.0482645	0.935847
ENST00000420781	ENSG00000187239	FNBP1	0.000889381	0.0189737	0.650623	0.195772	5.90046	0.145075	0.0433494	-0.0151986	0.0333041	0.0333041	0.93865
ENST00000311412	ENSG00000173083	HPSE	6.74984e-05	0.00204681	0.651393	0.163464	5.49441	0.140042	0.00914315	0.0128015	0.0442978	0.0442978	0.939761
ENST00000526627	ENSG00000256235	SMIM3	0.000121881	0.00343301	0.653827	0.170165	5.33761	0.145519	0.00713264	0.0201425	0.0507797	0.0507797	0.943272
ENST00000396037	ENSG00000111728	ST8SIA1	5.39408e-05	0.00168629	0.654416	0.16207	6.85368	0.167389	0.00183681	0.0506966	0.0226139	0.0506966	0.944122
ENST00000262644	ENSG00000104331	IMPAD1	1.17398e-08	8.22066e-07	0.655254	0.114887	8.89352	0.129101	0.000186154	0.00731258	0.0262119	0.0262119	0.945331
ENST00000433497	ENSG00000100852	ARHGAP5	8.83501e-07	4.23087e-05	0.655274	0.133295	7.03585	0.15314	0.00329662	0.0322386	0.0216693	0.0322386	0.94536
ENST00000454158	ENSG00000181826	RELL1	2.40552e-05	0.000828089	0.656061	0.155336	6.46175	0.164341	0.00223979	0.0460189	0.0255963	0.0460189	0.946495
ENST00000449934	ENSG00000204520	MICA	3.83796e-05	0.00124942	0.656091	0.159361	6.83796	0.166523	0.00201249	0.0487791	0.0227082	0.0487791	0.946539
ENST00000343411	ENSG00000140943	MBTPS1	1.42203e-10	1.37361e-08	0.65648	0.102359	7.7741	0.138196	0.000603212	0.0169704	0.0203515	0.0203515	0.9471
ENST00000371626	ENSG00000117862	TXNDC12	1.37051e-06	6.30014e-05	0.65666	0.135976	7.74585	0.154897	0.000704369	0.0362744	0.0203317	0.0362744	0.94736
ENST00000261017	ENSG00000138443	ABI2	2.615e-10	2.39931e-08	0.657621	0.104053	8.15969	0.139141	0.000463234	0.0177126	0.021191	0.021191	0.948746
ENST00000370447	ENSG00000162664	ZNF326	7.04674e-06	0.000277901	0.65771	0.146409	5.8975	0.160342	0.00500996	0.0378613	0.0333628	0.0378613	0.948874
ENST00000529032	ENSG00000158636	EMSY	0.000339928	0.00831559	0.658436	0.183777	5.51669	0.1654	0.0240431	0.0244113	0.0435046	0.0435046	0.949921
ENST00000522663	ENSG00000161010	MRNIP	6.62096e-06	0.000262947	0.658682	0.146194	6.63064	0.1606	0.00238764	0.040358	0.0241522	0.040358	0.950277
ENST00000299977	ENSG00000166750	SLFN5	4.97919e-08	3.05672e-06	0.659787	0.121016	8.0146	0.149482	0.000582341	0.0287075	0.0207476	0.0287075	0.951871
ENST00000374179	ENSG00000107643	MAPK8	0.000490792	0.0114518	0.662061	0.189935	5.93196	0.140813	0.0394543	-0.0212809	0.032696	0.032696	0.955152
ENST00000311922	ENSG00000173334	TRIB1	1.52726e-10	1.47106e-08	0.663	0.103551	7.47858	0.136828	0.00102724	0.0120824	0.0204185	0.0204185	0.956506
ENST00000243298	ENSG00000123570	RAB9B	0.000320059	0.0079298	0.663202	0.1843	5.18313	0.134913	0.00836527	0.00242081	0.0595674	0.0595674	0.956797
ENST00000285667	ENSG00000155304	HSPA13	6.53936e-09	4.75107e-07	0.66564	0.114719	7.78861	0.149154	0.000491144	0.0258298	0.0203638	0.0258298	0.960315
ENST00000482262	ENSG00000145050	MANF	4.51674e-05	0.00144129	0.666493	0.163383	5.67157	0.154678	0.0147126	0.0176745	0.0386757	0.0386757	0.961546
ENST00000505458	ENSG00000109320	NFKB1	3.40915e-05	0.00112552	0.666665	0.160865	6.41697	0.165249	0.0257283	0.0189149	0.0260266	0.0260266	0.961793
ENST00000278505	ENSG00000149218	ENDOD1	2.71123e-08	1.75177e-06	0.667224	0.120023	8.03946	0.151892	0.000457517	0.0283536	0.0208124	0.0283536	0.9626
ENST00000267257	ENSG00000089159	PXN	3.27223e-06	0.000139617	0.667595	0.143478	8.07577	0.162628	0.00541067	0.0357611	0.0209152	0.0357611	0.963135
ENST00000305949	ENSG00000172167	MTBP	6.44921e-05	0.00196887	0.668299	0.167253	5.44059	0.155664	0.00961771	0.0231152	0.0463293	0.0463293	0.964151
ENST00000417362	ENSG00000103544	VPS35L	1.03376e-06	4.88136e-05	0.668649	0.136875	6.47946	0.159857	0.00558404	0.0318855	0.0254322	0.0318855	0.964656
ENST00000371085	ENSG00000087460	GNAS	1.71977e-06	7.77374e-05	0.669329	0.139914	8.41248	0.161559	0.00377301	0.0353791	0.0223597	0.0353791	0.965636
ENST00000358252	ENSG00000149115	TNKS1BP1	2.99916e-05	0.00100936	0.669565	0.160431	6.67642	0.172214	0.0107228	0.0407537	0.023801	0.0407537	0.965978
ENST00000321037	ENSG00000001561	ENPP4	4.51434e-07	2.29489e-05	0.669792	0.13274	5.98841	0.14009	0.00356745	0.0103306	0.0316726	0.0316726	0.966305
ENST00000336418	ENSG00000157823	AP3S2	3.58421e-05	0.00117674	0.670151	0.162156	6.55868	0.173391	0.00283013	0.0497587	0.0247364	0.0497587	0.966823
ENST00000260502	ENSG00000137936	BCAR3	1.26044e-07	7.11234e-06	0.672141	0.127191	6.65553	0.135181	0.00839568	-0.00127556	0.0239593	0.0239593	0.969694
ENST00000371095	ENSG00000087460	GNAS	0.000139236	0.00387826	0.672424	0.176511	8.67197	0.182597	0.00240837	0.0599041	0.0241441	0.0599041	0.970102
ENST00000355312	ENSG00000139436	GIT2	9.52774e-10	7.94522e-08	0.672697	0.109969	7.49417	0.136843	0.00378667	0.00502365	0.0203999	0.0203999	0.970496
ENST00000521022	ENSG00000104299	INTS9	2.89198e-06	0.000124729	0.673533	0.143968	6.57933	0.165145	0.0049414	0.0365123	0.0245644	0.0365123	0.971702
ENST00000393892	ENSG00000173786	CNP	0.000146174	0.00404221	0.674251	0.177552	6.58237	0.183932	0.00445756	0.058592	0.0245394	0.058592	0.972738
ENST00000358161	ENSG00000197694	SPTAN1	1.868e-07	1.02502e-05	0.675243	0.129555	8.32203	0.151556	0.011688	0.0131433	0.021881	0.021881	0.974169
ENST00000317216	ENSG00000179388	EGR3	1.65411e-06	7.49696e-05	0.675928	0.141064	6.93177	0.164649	0.00123143	0.0385664	0.0221762	0.0385664	0.975157
ENST00000424649	ENSG00000089159	PXN	6.67542e-09	4.84472e-07	0.675958	0.116567	8.79366	0.151527	0.00196323	0.0225121	0.0252124	0.0252124	0.975201
ENST00000378163	ENSG00000147044	CASK	0.000222791	0.00584441	0.67599	0.183113	5.72598	0.166229	0.0298309	0.0117822	0.0372295	0.0372295	0.975247
ENST00000548676	ENSG00000110888	CAPRIN2	1.03901e-07	5.9876e-06	0.676406	0.12715	6.60286	0.140047	0.00796129	0.00291861	0.0243728	0.0243728	0.975847
ENST00000542527	ENSG00000185716	MOSMO	1.49693e-06	6.83954e-05	0.677124	0.140726	7.74496	0.164948	0.000578981	0.0390287	0.0203312	0.0390287	0.976882
ENST00000366835	ENSG00000196187	TMEM63A	6.11179e-10	5.25187e-08	0.67869	0.109687	6.90276	0.149275	0.00172951	0.0188846	0.022333	0.022333	0.979143
ENST00000276440	ENSG00000147459	DOCK5	3.92564e-05	0.00127307	0.678889	0.165107	6.62317	0.178415	0.00228213	0.0522384	0.0242109	0.0522384	0.979429
ENST00000562435	ENSG00000171208	NETO2	1.17294e-05	0.000438075	0.679501	0.155047	5.61104	0.152096	0.00764932	0.0158893	0.0404296	0.0404296	0.980312
ENST00000375533	ENSG00000095739	BAMBI	5.16386e-10	4.50013e-08	0.681081	0.109604	8.6204	0.141708	0.000287869	0.010414	0.023738	0.023738	0.982592
ENST00000477081	ENSG00000121068	TBX2	2.10685e-06	9.34871e-05	0.681432	0.143674	5.88129	0.154662	0.00759651	0.0180589	0.0336881	0.0336881	0.983098
ENST00000263212	ENSG00000100034	PPM1F	5.5245e-05	0.00172308	0.682358	0.169225	7.78127	0.182124	0.000675705	0.0565985	0.0203573	0.0565985	0.984433
ENST00000537553	ENSG00000110888	CAPRIN2	1.74852e-06	7.8879e-05	0.682537	0.142775	6.47107	0.168047	0.00442868	0.0363408	0.0255096	0.0363408	0.984693
ENST00000340385	ENSG00000117592	PRDX6	4.86048e-08	2.9947e-06	0.682681	0.125117	8.23926	0.159994	0.00070308	0.0306054	0.0215028	0.0306054	0.9849
ENST00000368989	ENSG00000107679	PLEKHA1	2.26358e-05	0.000783607	0.68377	0.161374	6.55547	0.146521	0.0273199	-0.0122258	0.0247634	0.0247634	0.98647
ENST00000356239	ENSG00000127914	AKAP9	1.34001e-10	1.30181e-08	0.684318	0.106549	8.28965	0.149142	0.000979127	0.016923	0.0217263	0.0217263	0.987262
ENST00000433091	ENSG00000105854	PON2	3.22419e-06	0.000137828	0.685712	0.147275	6.39626	0.158887	0.0171466	0.0114878	0.0262334	0.0262334	0.989273
ENST00000222803	ENSG00000106080	FKBP14	5.57237e-11	5.7431e-09	0.685776	0.104622	7.25885	0.139698	0.0010296	0.00518923	0.020862	0.020862	0.989364
ENST00000366935	ENSG00000092978	GPATCH2	0.000617248	0.0139552	0.687134	0.200686	5.04606	0.174891	0.0107084	0.0359462	0.0698417	0.0698417	0.991324
ENST00000378533	ENSG00000101955	SRPX	9.94534e-09	7.059e-07	0.687413	0.119933	8.78784	0.159669	0.000414618	0.0283531	0.0251577	0.0283531	0.991727
ENST00000265734	ENSG00000105810	CDK6	2.66796e-05	0.000908273	0.68886	0.16401	8.40689	0.181693	0.000276638	0.0535222	0.0223281	0.0535222	0.993815
ENST00000358655	ENSG00000140105	WARS	7.64411e-11	7.73701e-09	0.689256	0.105918	8.18055	0.152995	0.00116939	0.0189671	0.0212679	0.0212679	0.994385
ENST00000371337	ENSG00000116209	TMEM59	3.62879e-05	0.00118933	0.689884	0.167045	5.72522	0.183818	0.00562988	0.0501783	0.0372489	0.0501783	0.995292
ENST00000519973	ENSG00000147454	SLC25A37	9.54119e-09	6.77925e-07	0.689918	0.120222	6.38541	0.143669	0.00256297	0.00638842	0.0263438	0.0263438	0.995341
ENST00000621096	ENSG00000110047	EHD1	1.7095e-10	1.62807e-08	0.690628	0.108157	7.07871	0.155697	0.00191088	0.0207466	0.0214851	0.0214851	0.996365
ENST00000301981	ENSG00000168904	LRRC28	0.000918584	0.0195291	0.690726	0.208405	5.04781	0.170387	0.0171712	0.0225797	0.0696941	0.0696941	0.996506
ENST00000377102	ENSG00000136158	SPRY2	6.14796e-06	0.000246047	0.691708	0.152991	5.92032	0.176828	0.0123687	0.0344437	0.0329175	0.0344437	0.997922
ENST00000327299	ENSG00000162433	AK4	1.91257e-06	8.52572e-05	0.692042	0.145312	7.19578	0.173033	0.0133363	0.028895	0.0210529	0.028895	0.998405
ENST00000246024	ENSG00000125827	TMX4	8.77892e-11	8.7936e-09	0.693836	0.106964	8.45159	0.150116	0.000294026	0.0143718	0.0225887	0.0225887	1.00099
ENST00000314218	ENSG00000181004	BBS12	0.00105682	0.0219579	0.694591	0.212092	4.99341	0.167773	0.0154879	0.0194279	0.0744785	0.0744785	1.00208
ENST00000547291	ENSG00000139318	DUSP6	9.10008e-07	4.34858e-05	0.695036	0.141551	6.09364	0.145135	0.010103	-0.00180366	0.0299701	0.0299701	1.00272
ENST00000350198	ENSG00000071054	MAP4K4	5.51292e-09	4.06198e-07	0.695311	0.119246	7.15783	0.15843	0.00725737	0.0164247	0.0211818	0.0211818	1.00312
ENST00000341165	ENSG00000188554	NBR1	1.93311e-11	2.15646e-09	0.695408	0.103622	7.8153	0.156046	0.00108494	0.0197714	0.0203902	0.0203902	1.00326
ENST00000449705	ENSG00000229998	PPP1R18	2.51189e-07	1.3467e-05	0.695432	0.134857	5.92979	0.157232	0.00363589	0.0185927	0.0327369	0.0327369	1.0033
ENST00000451544	ENSG00000225060	PPP1R18	2.51189e-07	1.3467e-05	0.695432	0.134857	5.92979	0.157232	0.00363589	0.0185927	0.0327369	0.0327369	1.0033
ENST00000399199	ENSG00000146112	PPP1R18	2.51189e-07	1.3467e-05	0.695432	0.134857	5.92979	0.157232	0.00363589	0.0185927	0.0327369	0.0327369	1.0033
ENST00000279488	ENSG00000139318	DUSP6	3.45671e-11	3.6977e-09	0.695994	0.105045	7.50546	0.148317	0.00168148	0.0098853	0.0203874	0.0203874	1.00411
ENST00000480623	ENSG00000096093	EFHC1	1.04162e-07	5.99754e-06	0.696756	0.130986	6.10747	0.161071	0.00455042	0.0215425	0.0297644	0.0297644	1.00521
ENST00000296464	ENSG00000164070	HSPA4L	1.09852e-07	6.25601e-06	0.69707	0.131284	6.11133	0.159811	0.00476346	0.019714	0.0297076	0.0297076	1.00566
ENST00000369705	ENSG00000065833	ME1	1.33914e-08	9.26226e-07	0.697832	0.122836	7.72651	0.165001	0.000475752	0.0297018	0.0203214	0.0297018	1.00676
ENST00000406449	ENSG00000073008	PVR	0.000170615	0.00463423	0.698139	0.185726	5.25591	0.194166	0.013905	0.0501563	0.0550834	0.0550834	1.0072
ENST00000262348	ENSG00000116729	WLS	2.35288e-09	1.83127e-07	0.698259	0.116935	6.69544	0.151236	0.00368724	0.0102335	0.0236602	0.0236602	1.00737
ENST00000083182	ENSG00000062725	APPBP2	8.6875e-09	6.21179e-07	0.699591	0.121572	6.38754	0.157077	0.00323747	0.0168766	0.026322	0.026322	1.0093
ENST00000337057	ENSG00000079819	EPB41L2	1.87037e-07	1.02549e-05	0.699714	0.134256	7.50508	0.170785	0.00589452	0.030155	0.0203878	0.030155	1.00947
ENST00000265000	ENSG00000109586	GALNT7	1.49402e-11	1.68608e-09	0.700317	0.103774	7.33407	0.149162	0.000866282	0.00967518	0.0206718	0.0206718	1.01034
ENST00000400904	ENSG00000178585	CTNNBIP1	5.02437e-05	0.00158683	0.700755	0.172834	6.82265	0.191511	0.00351079	0.0562326	0.022802	0.0562326	1.01097
ENST00000322008	ENSG00000177697	CD151	0.000181516	0.00488707	0.701722	0.187454	8.19436	0.200928	0.00269777	0.06758	0.0213207	0.06758	1.01237
ENST00000392749	ENSG00000136560	TANK	2.90842e-05	0.000981744	0.702808	0.168115	5.94808	0.189576	0.0122161	0.0443092	0.0323952	0.0443092	1.01394
ENST00000357949	ENSG00000197019	SERTAD1	7.14161e-06	0.000281151	0.703007	0.156592	5.51958	0.153904	0.00563801	0.00917669	0.043404	0.043404	1.01422
ENST00000337664	ENSG00000109576	AADAT	7.45526e-05	0.00223767	0.703076	0.177487	5.83598	0.158299	0.0283644	-0.00845447	0.0346392	0.0346392	1.01432
ENST00000302060	ENSG00000170464	DNAJC18	4.56714e-05	0.00145532	0.704011	0.17269	5.33435	0.179667	0.00870601	0.0356945	0.0509374	0.0509374	1.01567
ENST00000507668	ENSG00000164300	SERINC5	9.0479e-11	9.04964e-09	0.705679	0.108866	8.5783	0.161532	0.000277734	0.0221817	0.0234261	0.0234261	1.01808
ENST00000333314	ENSG00000251201	TMED7-TICAM2	4.39698e-06	0.000181988	0.706912	0.153955	5.64225	0.181833	0.0078989	0.0376643	0.0395055	0.0395055	1.01986
ENST00000433722	ENSG00000110888	CAPRIN2	0.000423453	0.0101069	0.708795	0.201075	5.74188	0.177575	0.0440341	-0.00432611	0.0368285	0.0368285	1.02257
ENST00000233741	ENSG00000115392	FANCL	3.254e-07	1.70805e-05	0.709353	0.138868	6.9023	0.176825	0.00921734	0.0293513	0.0223355	0.0293513	1.02338
ENST00000585916	ENSG00000078043	PIAS2	2.08696e-08	1.38896e-06	0.709574	0.126605	6.20344	0.155947	0.00361841	0.0104879	0.0284392	0.0284392	1.0237
ENST00000035307	ENSG00000033100	CHPF2	3.92363e-11	4.15126e-09	0.712409	0.107828	7.01994	0.152727	0.00151232	0.00749386	0.0217412	0.0217412	1.02779
ENST00000581230	ENSG00000108654	DDX5	1.92069e-10	1.81388e-08	0.713014	0.111976	8.70413	0.162737	0.000666109	0.0197313	0.0244112	0.0244112	1.02866
ENST00000546136	ENSG00000134532	SOX5	2.30761e-06	0.000101729	0.714265	0.151185	6.95943	0.184948	0.00171276	0.0440013	0.0220331	0.0440013	1.03047
ENST00000343150	ENSG00000135047	CTSL	2.19532e-05	0.000764454	0.715734	0.168645	5.62171	0.174427	0.0167732	0.0159668	0.0401088	0.0401088	1.03259
ENST00000325551	ENSG00000119326	CTNNAL1	5.86375e-12	7.14123e-10	0.716967	0.104166	7.77019	0.161341	0.00135278	0.0155313	0.0203484	0.0203484	1.03436
ENST00000326840	ENSG00000057019	DCBLD2	2.51033e-09	1.93381e-07	0.717128	0.120308	8.76666	0.171748	0.000497669	0.0284502	0.0249615	0.0284502	1.0346
ENST00000368090	ENSG00000143315	PIGM	4.40283e-09	3.27255e-07	0.717329	0.122238	6.50637	0.172632	0.00187381	0.0280104	0.0251891	0.0280104	1.03489
ENST00000358755	ENSG00000164930	FZD6	2.45495e-07	1.3214e-05	0.718233	0.139163	7.31028	0.180588	0.0162214	0.0225111	0.0207276	0.0225111	1.03619
ENST00000262031	ENSG00000076067	RBMS2	2.91848e-08	1.88209e-06	0.718861	0.129612	6.65998	0.176445	0.00240503	0.0311934	0.0239253	0.0311934	1.0371
ENST00000308385	ENSG00000139318	DUSP6	3.86791e-11	4.09872e-09	0.719078	0.108802	7.10408	0.165033	0.002293	0.0178875	0.0213827	0.0213827	1.03741
ENST00000328827	ENSG00000177425	PAWR	1.31307e-08	9.09122e-07	0.719116	0.126508	6.13729	0.1623	0.00267459	0.014299	0.029334	0.029334	1.03746
ENST00000399022	ENSG00000141425	RPRD1A	3.34069e-11	3.60204e-09	0.72012	0.108604	7.01419	0.166958	0.00182177	0.0201047	0.0217677	0.0217677	1.03891
ENST00000489264	ENSG00000196968	FUT11	3.66662e-06	0.00015498	0.720175	0.155564	5.5563	0.186453	0.00624063	0.0384036	0.0421598	0.0421598	1.03899
ENST00000264657	ENSG00000168610	STAT3	1.09181e-06	5.134e-05	0.720548	0.147825	7.41614	0.185801	0.00207151	0.0416331	0.02051	0.0416331	1.03953
ENST00000368172	ENSG00000183853	KIRREL1	5.98515e-10	5.16929e-08	0.720562	0.116392	8.91057	0.162515	0.000699874	0.0158311	0.0263943	0.0263943	1.03955
ENST00000485438	ENSG00000143641	GALNT2	0.000382434	0.00923199	0.720861	0.20295	5.34549	0.155317	0.0319741	-0.0239843	0.0504032	0.0504032	1.03998
ENST00000378239	ENSG00000068912	ERLEC1	0.000255535	0.00654921	0.721384	0.19728	5.75898	0.195268	0.0414311	0.0129162	0.0364078	0.0364078	1.04074
ENST00000373850	ENSG00000119397	CNTRL	2.2514e-05	0.00078139	0.721628	0.17026	6.5527	0.198479	0.0129428	0.0450344	0.0247868	0.0450344	1.04109
ENST00000374395	ENSG00000117602	RCAN3	1.12947e-09	9.31545e-08	0.723175	0.118749	7.56403	0.173597	0.0012318	0.0269708	0.0203371	0.0269708	1.04332
ENST00000262051	ENSG00000110911	SLC11A2	0.000651766	0.0146281	0.724109	0.212404	5.07519	0.183739	0.0227854	0.0167986	0.0674459	0.0674459	1.04467
ENST00000503787	ENSG00000164294	GPX8	2.43864e-10	2.25584e-08	0.724748	0.114479	7.09028	0.172541	0.00280729	0.0234038	0.0214378	0.0234038	1.04559
ENST00000303498	ENSG00000169814	BTD	4.16543e-06	0.000173372	0.72535	0.157584	6.11499	0.192894	0.00532763	0.0443375	0.0296541	0.0443375	1.04646
ENST00000471567	ENSG00000162512	SDC3	2.91182e-07	1.54038e-05	0.725571	0.141463	5.95756	0.179539	0.00780177	0.0261754	0.0322216	0.0322216	1.04678
ENST00000333628	ENSG00000137267	TUBB2A	4.14871e-07	2.12884e-05	0.725631	0.143349	8.80399	0.185667	0.000292064	0.0408056	0.0253104	0.0408056	1.04686
ENST00000342745	ENSG00000100647	SUSD6	8.24113e-10	6.94933e-08	0.726757	0.11836	6.42477	0.159634	0.00206826	0.00811264	0.02595	0.02595	1.04849
ENST00000282903	ENSG00000152952	PLOD2	3.3084e-10	2.99095e-08	0.727591	0.115792	8.18214	0.174239	0.00197006	0.0248456	0.0212739	0.0248456	1.04969
ENST00000359943	ENSG00000196937	FAM3C	6.96192e-12	8.34358e-10	0.728586	0.106232	8.36868	0.156443	0.000451367	0.00511911	0.0221192	0.0221192	1.05113
ENST00000316754	ENSG00000126785	RHOJ	5.04628e-07	2.5538e-05	0.729041	0.145096	5.78599	0.177797	0.00634125	0.0239218	0.0357644	0.0357644	1.05178
ENST00000397560	ENSG00000006459	KDM7A	9.61269e-06	0.000366913	0.729259	0.164778	5.83014	0.198494	0.0102163	0.0440873	0.0347664	0.0440873	1.0521
ENST00000370630	ENSG00000117151	CTBS	0.000614892	0.0139065	0.72939	0.212963	5.0268	0.20654	0.0192154	0.0444114	0.0714913	0.0714913	1.05229
ENST00000233838	ENSG00000115486	GGCX	2.17888e-10	2.02663e-08	0.729806	0.114963	6.73458	0.173463	0.0030522	0.0217819	0.0233809	0.0233809	1.05289
ENST00000376004	ENSG00000134901	KDELC1	1.62413e-06	7.38086e-05	0.730197	0.152273	5.7285	0.192089	0.00522984	0.0411442	0.0371653	0.0411442	1.05345
ENST00000378823	ENSG00000113522	RAD50	3.98086e-07	2.05142e-05	0.731268	0.144238	5.9746	0.179605	0.00969375	0.0215948	0.0319154	0.0319154	1.055
ENST00000256997	ENSG00000134575	ACP2	7.25561e-05	0.00218258	0.733312	0.184818	5.67236	0.212198	0.025632	0.0426837	0.0386538	0.0426837	1.05795
ENST00000474024	ENSG00000125868	DSTN	9.04663e-10	7.56265e-08	0.73514	0.120015	8.78909	0.179101	0.000218179	0.0285892	0.0251694	0.0285892	1.06058
ENST00000398453	ENSG00000170545	SMAGP	5.88118e-05	0.00182091	0.735711	0.183125	5.80776	0.212137	0.0134147	0.053655	0.0352643	0.053655	1.06141
ENST00000331728	ENSG00000182541	LIMK2	0.00017777	0.00479767	0.736031	0.196344	7.77182	0.220871	0.00244602	0.0746561	0.0203497	0.0746561	1.06187
ENST00000489224	ENSG00000134121	CHL1	0.00023102	0.00601808	0.736141	0.199906	5.01806	0.200951	0.00766791	0.046141	0.0722571	0.0722571	1.06203
ENST00000312562	ENSG00000175592	FOSL1	3.63984e-05	0.00119159	0.736246	0.178301	7.68239	0.209373	0.00128649	0.0622962	0.0203076	0.0622962	1.06218
ENST00000302278	ENSG00000150093	ITGB1	1.13946e-08	8.00379e-07	0.737479	0.129189	9.39028	0.168455	0.000208874	0.0150299	0.0331705	0.0331705	1.06396
ENST00000354981	ENSG00000089177	KIF16B	1.20464e-10	1.18389e-08	0.7377	0.114572	6.75631	0.164893	0.00302178	0.00795241	0.0232317	0.0232317	1.06428
ENST00000544604	ENSG00000183579	ZNRF3	3.61741e-09	2.7186e-07	0.737734	0.125023	6.27165	0.181569	0.00366566	0.0267476	0.0275957	0.0275957	1.06432
ENST00000229708	ENSG00000111981	ULBP1	5.30996e-06	0.000215818	0.737989	0.162119	5.4189	0.190995	0.00536814	0.0359164	0.0471967	0.0471967	1.06469
ENST00000233121	ENSG00000084764	MAPRE3	6.1751e-07	3.07e-05	0.738026	0.14803	5.95613	0.165786	0.011578	0.000278059	0.0322476	0.0322476	1.06475
ENST00000330198	ENSG00000185621	LMLN	7.78646e-10	6.61536e-08	0.738725	0.120133	6.69666	0.163418	0.00521258	0.00353652	0.0236513	0.0236513	1.06575
ENST00000330909	ENSG00000151276	MAGI1	6.44043e-05	0.00196796	0.739108	0.184959	6.57505	0.214726	0.00577745	0.0626422	0.0245997	0.0626422	1.06631
ENST00000549982	ENSG00000198015	MRPL42	2.19356e-06	9.69534e-05	0.739879	0.156267	5.54666	0.179531	0.00635883	0.0206204	0.0424796	0.0424796	1.06742
ENST00000264036	ENSG00000076706	MCAM	2.93077e-09	2.2336e-07	0.74064	0.124783	9.26076	0.171635	0.000145583	0.0172455	0.030996	0.030996	1.06852
ENST00000369583	ENSG00000138166	DUSP5	5.80259e-09	4.2431e-07	0.741238	0.127309	6.14565	0.173596	0.00319886	0.016185	0.0292164	0.0292164	1.06938
ENST00000367559	ENSG00000135828	RNASEL	2.6435e-06	0.000115038	0.741434	0.157862	5.52814	0.174776	0.00673316	0.0139306	0.0431074	0.0431074	1.06966
ENST00000482054	ENSG00000135047	CTSL	0.000102332	0.00295112	0.741715	0.190918	5.64332	0.219668	0.0212554	0.0516439	0.0394743	0.0516439	1.07007
ENST00000541490	ENSG00000123094	RASSF8	9.5709e-05	0.00278622	0.741809	0.190148	7.91097	0.198246	0.0517862	-0.00392565	0.0205263	0.0205263	1.0702
ENST00000368575	ENSG00000143545	RAB13	1.37564e-06	6.31514e-05	0.743196	0.153918	7.97671	0.198424	0.000472436	0.0469093	0.0206577	0.0469093	1.0722
ENST00000430479	ENSG00000006468	ETV1	7.49687e-05	0.00224916	0.744186	0.187929	5.7478	0.218776	0.0324693	0.038165	0.0366818	0.038165	1.07363
ENST00000270001	ENSG00000142065	ZFP14	9.84858e-05	0.00285356	0.744287	0.191123	5.10307	0.171441	0.00779225	0.0075675	0.0652634	0.0652634	1.07378
ENST00000262067	ENSG00000106537	TSPAN13	3.19225e-13	4.56992e-11	0.74509	0.102263	7.63941	0.169451	0.00060822	0.0120319	0.0203072	0.0203072	1.07494
ENST00000456397	ENSG00000169490	TM2D2	4.31607e-07	2.20903e-05	0.745247	0.147443	5.84679	0.163044	0.00907259	-0.00398485	0.0344065	0.0344065	1.07516
ENST00000274276	ENSG00000145623	OSMR	2.48404e-06	0.000108869	0.746687	0.158551	5.49048	0.197653	0.0058364	0.0389119	0.0444406	0.0444406	1.07724
ENST00000343526	ENSG00000122779	TRIM24	2.61432e-07	1.39719e-05	0.746902	0.145049	5.81479	0.172901	0.00697214	0.00879164	0.035106	0.035106	1.07755
ENST00000261646	ENSG00000072310	SREBF1	8.58904e-08	5.0617e-06	0.747152	0.139543	6.88334	0.192877	0.00418225	0.034762	0.0224418	0.034762	1.07791
ENST00000533608	ENSG00000151348	EXT2	7.87613e-12	9.34004e-10	0.748281	0.109385	7.5604	0.175609	0.00359076	0.0146444	0.0203395	0.0203395	1.07954
ENST00000559488	ENSG00000259207	ITGB3	3.63849e-07	1.89227e-05	0.748299	0.147101	9.09038	0.197081	0.000171723	0.0431059	0.0285427	0.0431059	1.07957
ENST00000368984	ENSG00000166033	HTRA1	4.67516e-05	0.00148764	0.749559	0.184108	8.47479	0.218632	0.000691943	0.0670996	0.022731	0.0670996	1.08138
ENST00000377453	ENSG00000102805	CLN5	4.16575e-06	0.000173372	0.751749	0.16332	5.96649	0.20719	0.00640503	0.0469415	0.0320601	0.0469415	1.08454
ENST00000381431	ENSG00000163069	SGCB	1.29868e-11	1.48043e-09	0.75181	0.11107	6.93728	0.182639	0.00139772	0.0232755	0.0221472	0.0232755	1.08463
ENST00000393564	ENSG00000160211	G6PD	0.000102716	0.00296093	0.752394	0.193712	6.66683	0.226069	0.0136604	0.0613883	0.0238732	0.0613883	1.08547
ENST00000305366	ENSG00000169908	TM4SF1	1.60813e-10	1.54018e-08	0.753559	0.11784	7.87405	0.186048	0.000990937	0.0267818	0.0204661	0.0267818	1.08716
ENST00000359135	ENSG00000144366	GULP1	1.73027e-06	7.816e-05	0.754104	0.157676	7.70583	0.205098	0.00188792	0.0478356	0.0203133	0.0478356	1.08794
ENST00000428386	ENSG00000033867	SLC4A7	2.46366e-06	0.000108185	0.754856	0.160229	7.18317	0.206813	0.0189093	0.0324371	0.0210946	0.0324371	1.08903
ENST00000258884	ENSG00000136379	ABHD17C	5.77737e-12	7.04871e-10	0.756562	0.109885	6.91163	0.1737	0.00186513	0.009989	0.0222843	0.0222843	1.09149
ENST00000380492	ENSG00000130150	MOSPD2	2.02939e-06	9.01682e-05	0.75683	0.159317	7.32958	0.207166	0.0015621	0.0492015	0.020682	0.0492015	1.09187
ENST00000329421	ENSG00000175130	MARCKSL1	4.21793e-06	0.000175113	0.756856	0.164522	8.60614	0.210067	0.000277754	0.0538569	0.0236304	0.0538569	1.09191
ENST00000241704	ENSG00000122218	COPA	9.79892e-10	8.1313e-08	0.756998	0.123841	9.07287	0.187063	0.00235862	0.0248664	0.0283146	0.0283146	1.09212
ENST00000308775	ENSG00000173402	DAG1	2.07174e-10	1.94568e-08	0.758849	0.119392	8.89348	0.175974	0.00229755	0.0110543	0.0262115	0.0262115	1.09479
ENST00000336278	ENSG00000168807	SNTB2	8.58895e-12	1.00794e-09	0.759291	0.111197	7.68332	0.185917	0.000614721	0.0241147	0.0203078	0.0241147	1.09542
ENST00000375856	ENSG00000185950	IRS2	1.1385e-08	8.00379e-07	0.759316	0.133011	7.86563	0.195061	0.000527492	0.0348562	0.0204537	0.0348562	1.09546
ENST00000349062	ENSG00000146833	TRIM4	2.81943e-07	1.49384e-05	0.759564	0.147915	6.2521	0.202346	0.0128853	0.0308725	0.0278297	0.0308725	1.09582
ENST00000361377	ENSG00000164172	MOCS2	1.05291e-06	4.9649e-05	0.760143	0.15572	5.5694	0.175102	0.00676475	0.00491524	0.0417325	0.0417325	1.09665
ENST00000280154	ENSG00000150593	PDCD4	5.77658e-10	5.00191e-08	0.760353	0.122709	7.22675	0.190995	0.00295248	0.0271624	0.0209556	0.0271624	1.09696
ENST00000369709	ENSG00000116473	RAP1A	6.73756e-08	4.04092e-06	0.761909	0.141146	6.01005	0.200011	0.00486164	0.0349826	0.0313016	0.0349826	1.0992
ENST00000264658	ENSG00000108306	FBXL20	1.33709e-07	7.50732e-06	0.762525	0.14459	5.77689	0.196635	0.00583443	0.0297583	0.0359784	0.0359784	1.10009
ENST00000532313	ENSG00000159176	CSRP1	5.73263e-07	2.87111e-05	0.762525	0.152505	6.10842	0.205997	0.00665048	0.0398648	0.0297504	0.0398648	1.10009
ENST00000335154	ENSG00000161791	FMNL3	1.24846e-10	1.21987e-08	0.762737	0.11856	6.5583	0.186972	0.0033736	0.020837	0.0247396	0.0247396	1.1004
ENST00000226578	ENSG00000109323	MANBA	5.15494e-07	2.6049e-05	0.762964	0.151971	6.5129	0.20591	0.00498204	0.0412083	0.0251311	0.0412083	1.10072
ENST00000243077	ENSG00000123384	LRP1	5.5474e-05	0.00172863	0.763099	0.189294	7.33444	0.227804	0.00133113	0.0703336	0.020671	0.0703336	1.10092
ENST00000368173	ENSG00000183853	KIRREL1	1.27908e-06	5.90392e-05	0.763628	0.157677	7.08946	0.209229	0.0229428	0.0267815	0.0214411	0.0267815	1.10168
ENST00000185150	ENSG00000068912	ERLEC1	1.9176e-13	2.81663e-11	0.763713	0.103844	7.84951	0.175166	0.00113578	0.00880522	0.0204314	0.0204314	1.1018
ENST00000371996	ENSG00000107789	MINPP1	6.38573e-13	8.82443e-11	0.766146	0.106528	7.26844	0.175147	0.0018608	0.00681724	0.0208355	0.0208355	1.10531
ENST00000241436	ENSG00000122008	POLK	0.000234353	0.00609164	0.766351	0.208317	5.38407	0.212401	0.0381371	0.013899	0.0486546	0.0486546	1.10561
ENST00000361311	ENSG00000171603	CLSTN1	1.48289e-11	1.67631e-09	0.766857	0.113616	8.74956	0.175755	0.00101021	0.00801368	0.0248069	0.0248069	1.10634
ENST00000369902	ENSG00000107882	SUFU	8.72233e-07	4.18282e-05	0.76883	0.156315	6.30359	0.210773	0.00417692	0.0446918	0.0272258	0.0446918	1.10919
ENST00000505697	ENSG00000151883	PARP8	1.74269e-05	0.000619761	0.768918	0.179004	6.53546	0.223854	0.0218022	0.0422825	0.0249342	0.0422825	1.10931
ENST00000423057	ENSG00000128512	DOCK4	8.98142e-08	5.26089e-06	0.769126	0.143864	6.14043	0.195399	0.012104	0.0186766	0.0292896	0.0292896	1.10961
ENST00000263379	ENSG00000104998	IL27RA	5.67081e-07	2.84225e-05	0.769391	0.153813	5.56382	0.208347	0.00540369	0.0403467	0.0419135	0.0419135	1.11
ENST00000496567	ENSG00000148120	C9orf3	5.51456e-06	0.000223196	0.770505	0.169558	5.39522	0.182556	0.00932184	0.00576767	0.0481781	0.0481781	1.1116
ENST00000346786	ENSG00000101335	MYL9	0.00065618	0.0147028	0.770944	0.226265	4.89764	0.210048	0.0184047	0.0285328	0.0839869	0.0839869	1.11224
ENST00000519583	ENSG00000113240	CLK4	1.0328e-06	4.88025e-05	0.771045	0.15783	5.63837	0.193621	0.0102028	0.017518	0.0396179	0.0396179	1.11238
ENST00000331426	ENSG00000184898	RBM43	5.61903e-09	4.11776e-07	0.771208	0.132334	5.99628	0.190432	0.00348849	0.0204278	0.0315363	0.0315363	1.11262
ENST00000619360	ENSG00000146232	NFKBIE	0.000152009	0.00419096	0.771932	0.203796	5.7666	0.24145	0.0177372	0.0653286	0.0362237	0.0653286	1.11366
ENST00000371341	ENSG00000116209	TMEM59	3.77266e-05	0.00122994	0.772661	0.187495	7.32362	0.230837	0.00331518	0.0669932	0.0206958	0.0669932	1.11471
ENST00000497699	ENSG00000095739	BAMBI	1.49495e-05	0.000542482	0.774182	0.178818	5.61226	0.199923	0.0235595	0.00989863	0.0403926	0.0403926	1.11691
ENST00000262919	ENSG00000088812	ATRN	5.76225e-14	9.05289e-12	0.774344	0.103062	7.81748	0.173002	0.000850985	0.00111535	0.0203926	0.0203926	1.11714
ENST00000324344	ENSG00000188215	DCUN1D3	1.88964e-09	1.49478e-07	0.775819	0.129152	6.15473	0.178912	0.00427037	0.00382898	0.0290902	0.0290902	1.11927
ENST00000617285	ENSG00000149428	HYOU1	3.1322e-14	5.00214e-12	0.776437	0.10226	7.90976	0.184346	0.000390237	0.013729	0.0205242	0.0205242	1.12016
ENST00000630669	ENSG00000280682	HYOU1	3.1322e-14	5.00214e-12	0.776437	0.10226	7.90976	0.184346	0.000390237	0.013729	0.0205242	0.0205242	1.12016
ENST00000381465	ENSG00000071575	TRIB2	7.87244e-07	3.80219e-05	0.77762	0.157461	8.03613	0.215273	0.00112844	0.0484592	0.0208035	0.0484592	1.12187
ENST00000602540	ENSG00000139289	PHLDA1	2.40921e-09	1.87081e-07	0.777756	0.130332	8.79028	0.20195	0.000412893	0.03356	0.0251805	0.03356	1.12206
ENST00000497138	ENSG00000124224	PPP4R1L	9.14021e-05	0.00267595	0.777972	0.19885	5.06568	0.17709	0.0108675	-0.00600954	0.0682154	0.0682154	1.12238
ENST00000390664	ENSG00000183196	CHST6	0.000693226	0.01533	0.778311	0.229438	4.85112	0.229609	0.0161507	0.0498033	0.0891333	0.0891333	1.12287
ENST00000340342	ENSG00000135047	CTSL	5.19041e-14	8.1925e-12	0.780358	0.103674	7.63611	0.191976	0.00118892	0.0197975	0.0203076	0.0203076	1.12582
ENST00000517746	ENSG00000154188	ANGPT1	5.92948e-07	2.96094e-05	0.780459	0.156295	6.96793	0.192964	0.0268659	-0.00478068	0.0219903	0.0219903	1.12596
ENST00000337179	ENSG00000173598	NUDT4	0.000216093	0.0056935	0.780492	0.210977	5.11057	0.208117	0.0243278	0.0154195	0.0646946	0.0646946	1.12601
ENST00000358912	ENSG00000197329	PELI1	3.06997e-11	3.32071e-09	0.780573	0.1175	6.48854	0.187541	0.00226308	0.0134368	0.0253494	0.0253494	1.12613
ENST00000343218	ENSG00000113657	DPYSL3	6.21635e-14	9.7212e-12	0.782012	0.10422	7.96146	0.186241	0.00109938	0.0123346	0.0206244	0.0206244	1.1282
ENST00000295588	ENSG00000163389	POGLUT1	6.53234e-11	6.67156e-09	0.782559	0.119822	6.46429	0.187715	0.00314197	0.0117259	0.0255726	0.0255726	1.12899
ENST00000296140	ENSG00000163823	CCR1	4.96706e-05	0.00157239	0.782697	0.192917	5.35162	0.238833	0.00977009	0.0646638	0.0501147	0.0646638	1.12919
ENST00000422840	ENSG00000090863	GLG1	4.9101e-12	6.05606e-10	0.785537	0.113712	7.67951	0.198471	0.00305712	0.0228035	0.0203072	0.0228035	1.13329
ENST00000235307	ENSG00000116667	C1orf21	1.96342e-05	0.000691363	0.78571	0.18405	6.99376	0.234453	0.00139491	0.0663537	0.021864	0.0663537	1.13354
ENST00000353617	ENSG00000164144	ARFIP1	1.65743e-07	9.19916e-06	0.787317	0.150419	6.30824	0.187338	0.0180787	-0.00614	0.0271732	0.0271732	1.13586
ENST00000421587	ENSG00000147044	CASK	7.96803e-05	0.00237056	0.787628	0.199634	5.79864	0.245566	0.00731484	0.0723927	0.0354719	0.0723927	1.13631
ENST00000332408	ENSG00000185634	SHC4	0.000108068	0.003102	0.788006	0.203529	6.7688	0.248428	0.00287973	0.079968	0.0231479	0.079968	1.13685
ENST00000369314	ENSG00000121851	POLR3GL	0.000174251	0.00472341	0.789205	0.210248	5.95974	0.253734	0.0042875	0.0841208	0.032182	0.0841208	1.13858
ENST00000309575	ENSG00000175040	CHST2	7.2195e-07	3.51441e-05	0.790546	0.159533	6.51717	0.222191	0.00200649	0.0488954	0.0250935	0.0488954	1.14052
ENST00000217456	ENSG00000101474	APMAP	4.74762e-05	0.00150786	0.790765	0.1944	8.34288	0.243445	0.00184367	0.0737393	0.0219852	0.0737393	1.14083
ENST00000424785	ENSG00000079150	FKBP7	1.63691e-08	1.11174e-06	0.791568	0.140186	5.9688	0.212712	0.00465733	0.0346468	0.0320187	0.0346468	1.14199
ENST00000435422	ENSG00000170624	SGCD	9.88812e-06	0.000375521	0.792254	0.179259	6.59941	0.23442	0.00200747	0.0622601	0.0244005	0.0622601	1.14298
ENST00000491845	ENSG00000163689	C3orf67	0.000529908	0.0122296	0.792426	0.228683	4.8395	0.196228	0.014117	0.00550273	0.0904752	0.0904752	1.14323
ENST00000407627	ENSG00000066044	ELAVL1	6.04772e-05	0.00186635	0.793814	0.197912	5.12355	0.224439	0.0146112	0.0371878	0.0637272	0.0637272	1.14523
ENST00000398654	ENSG00000078043	PIAS2	1.76017e-06	7.93518e-05	0.79411	0.166161	5.62523	0.206664	0.0152147	0.0156893	0.0400039	0.0400039	1.14566
ENST00000359685	ENSG00000079156	OSBPL6	2.05704e-09	1.614e-07	0.794596	0.132582	6.40914	0.210529	0.00402173	0.0311343	0.0261042	0.0311343	1.14636
ENST00000369807	ENSG00000013563	DNASE1L1	5.66579e-05	0.00176147	0.795401	0.197551	5.45748	0.245923	0.0323792	0.0436429	0.0456734	0.0456734	1.14752
ENST00000471288	NA	NA	0.000259563	0.0066424	0.796035	0.217934	5.00171	0.205149	0.0212698	0.00684663	0.0737209	0.0737209	1.14843
ENST00000309983	ENSG00000137364	TPMT	4.86718e-14	7.70026e-12	0.798523	0.105969	7.12153	0.186691	0.00114373	0.00411571	0.0213152	0.0213152	1.15202
ENST00000336798	ENSG00000162512	SDC3	4.49636e-05	0.00143614	0.799238	0.195874	9.56093	0.24828	0.000117246	0.0766157	0.036502	0.0766157	1.15306
ENST00000303927	ENSG00000170955	CAVIN3	2.60534e-06	0.00011345	0.800018	0.170227	6.06441	0.232541	0.00505353	0.0529011	0.0304181	0.0529011	1.15418
ENST00000440460	ENSG00000150764	DIXDC1	5.4038e-10	4.6965e-08	0.800084	0.128902	6.31749	0.200887	0.00616204	0.0148275	0.0270696	0.0270696	1.15428
ENST00000457714	ENSG00000169760	NLGN1	7.14276e-12	8.53011e-10	0.800099	0.116722	6.74526	0.201804	0.00394076	0.0181105	0.0233071	0.0233071	1.1543
ENST00000216416	ENSG00000100528	CNIH1	2.48275e-06	0.000108869	0.800201	0.169911	7.40719	0.23244	0.0013582	0.056381	0.0205253	0.056381	1.15444
ENST00000369519	ENSG00000203867	RBM20	8.00188e-06	0.00031104	0.800285	0.17923	5.24025	0.223117	0.00825143	0.0385659	0.0559952	0.0559952	1.15457
ENST00000282841	ENSG00000152904	GGPS1	3.19151e-05	0.00106299	0.802831	0.193018	5.54542	0.248021	0.0105945	0.0639176	0.042521	0.0639176	1.15824
ENST00000372925	ENSG00000127603	MACF1	6.05631e-10	5.22409e-08	0.80377	0.129872	7.97034	0.213499	0.00503969	0.0286936	0.0206436	0.0286936	1.15959
ENST00000340834	ENSG00000151914	DST	1.32819e-05	0.000488249	0.805228	0.18488	5.87488	0.211502	0.0345423	-0.00392071	0.0338189	0.0338189	1.1617
ENST00000610712	ENSG00000186814	ZSCAN30	0.000142063	0.00394404	0.805496	0.211719	5.01564	0.227101	0.0171787	0.0314982	0.0724713	0.0724713	1.16208
ENST00000354724	ENSG00000164683	HEY1	1.91686e-09	1.51454e-07	0.805883	0.134209	7.68064	0.216434	0.00211099	0.033913	0.0203074	0.033913	1.16264
ENST00000301391	ENSG00000167740	CYB5D2	0.000130403	0.00365479	0.806392	0.210783	5.49536	0.261956	0.0113641	0.0774949	0.0442633	0.0774949	1.16338
ENST00000266037	ENSG00000088538	DOCK3	0.000329416	0.00811413	0.807574	0.224889	4.84912	0.19809	0.0117871	0.00192558	0.0893626	0.0893626	1.16508
ENST00000299957	ENSG00000166734	CASC4	5.77988e-11	5.9389e-09	0.810749	0.123791	6.91364	0.207874	0.00837524	0.0150402	0.0222733	0.0222733	1.16966
ENST00000373191	ENSG00000126070	AGO3	3.77534e-10	3.38147e-08	0.811614	0.129588	6.10203	0.202	0.00374113	0.012353	0.0298449	0.0298449	1.17091
ENST00000304758	ENSG00000126016	AMOT	6.15837e-08	3.71659e-06	0.812002	0.149978	6.59209	0.212257	0.0205269	0.00732357	0.0244599	0.0244599	1.17147
ENST00000479303	ENSG00000197448	GSTK1	5.17282e-08	3.16697e-06	0.812172	0.149152	5.92467	0.215187	0.0116583	0.0195182	0.0328344	0.0328344	1.17172
ENST00000361781	ENSG00000198964	SGMS1	0.000141094	0.00392036	0.812935	0.213579	5.69927	0.267017	0.00664384	0.0845884	0.0379247	0.0845884	1.17282
ENST00000298249	NA	NA	3.01353e-13	4.33238e-11	0.814932	0.11173	6.93496	0.211147	0.000540965	0.024426	0.0221594	0.024426	1.1757
ENST00000373758	ENSG00000165476	REEP3	3.01353e-13	4.33238e-11	0.814932	0.11173	6.93496	0.211147	0.000540965	0.024426	0.0221594	0.024426	1.1757
ENST00000585682	ENSG00000164125	FAM198B	0.000762129	0.0165936	0.815071	0.242134	6.86927	0.23721	0.0947355	-0.0394379	0.0225225	0.0225225	1.1759
ENST00000435456	ENSG00000100372	SLC25A17	6.64141e-15	1.12992e-12	0.815228	0.104635	7.94454	0.20545	0.00130766	0.0168517	0.0205895	0.0205895	1.17612
ENST00000606999	ENSG00000138085	ATRAID	7.23526e-07	3.51955e-05	0.818074	0.165103	7.44842	0.237942	0.00182263	0.0526951	0.0204593	0.0526951	1.18023
ENST00000360280	ENSG00000197969	VPS13A	5.54112e-07	2.78343e-05	0.819611	0.163707	5.69144	0.19889	0.0154662	-0.00734808	0.038134	0.038134	1.18245
ENST00000336824	ENSG00000075420	FNDC3B	5.11038e-12	6.29162e-10	0.820735	0.118904	8.377	0.216696	0.000696145	0.0275804	0.0221636	0.0275804	1.18407
ENST00000239243	ENSG00000120149	MSX2	3.36305e-08	2.15035e-06	0.821374	0.148762	6.03758	0.230696	0.00583252	0.0384276	0.0308457	0.0384276	1.18499
ENST00000621709	NA	NA	4.47196e-11	4.68021e-09	0.821843	0.124757	7.37372	0.21966	0.0025477	0.0285811	0.0205877	0.0285811	1.18567
ENST00000379504	ENSG00000175662	TOM1L2	0.00012031	0.00339157	0.822511	0.21389	5.48231	0.271719	0.0167193	0.0747783	0.0447399	0.0747783	1.18663
ENST00000559465	ENSG00000103855	CD276	1.36046e-08	9.36886e-07	0.823534	0.145032	6.99927	0.229832	0.00457893	0.0374896	0.0218377	0.0374896	1.18811
ENST00000322954	ENSG00000137831	UACA	8.53001e-11	8.56962e-09	0.826152	0.127278	6.45972	0.222778	0.00650408	0.0258951	0.0256153	0.0258951	1.19188
ENST00000293778	ENSG00000161921	CXCL16	1.72248e-05	0.000613219	0.826984	0.192406	5.52703	0.258717	0.030894	0.0429747	0.0431459	0.0431459	1.19309
ENST00000506123	ENSG00000164294	GPX8	3.95533e-11	4.17176e-09	0.827466	0.125265	7.05118	0.222528	0.00507337	0.0263091	0.0216018	0.0263091	1.19378
ENST00000452075	ENSG00000234420	ZNF37BP	6.7337e-12	8.11315e-10	0.827511	0.120572	6.43243	0.220572	0.00278591	0.0262894	0.0258755	0.0262894	1.19385
ENST00000234739	ENSG00000116128	BCL9	1.73512e-09	1.38061e-07	0.828256	0.137565	7.13586	0.228444	0.00151511	0.0363331	0.0212614	0.0363331	1.19492
ENST00000316308	ENSG00000113240	CLK4	9.52073e-07	4.52088e-05	0.829667	0.169275	5.61089	0.205535	0.0168741	-0.00653261	0.040434	0.040434	1.19696
ENST00000491720	ENSG00000138434	SSFA2	2.09465e-08	1.38918e-06	0.830413	0.148182	6.62775	0.234667	0.00686517	0.0370508	0.0241748	0.0370508	1.19803
ENST00000402844	ENSG00000100372	SLC25A17	0.000688475	0.0152299	0.831843	0.245083	4.90197	0.253678	0.0366056	0.0286982	0.0835257	0.0835257	1.20009
ENST00000483465	ENSG00000068885	IFT80	1.11441e-08	7.85225e-07	0.832031	0.145655	6.59207	0.234163	0.00514143	0.0372895	0.0244601	0.0372895	1.20037
ENST00000335012	ENSG00000187068	C3orf70	2.43145e-08	1.58614e-06	0.834935	0.149681	5.60984	0.232886	0.00434248	0.034986	0.0404661	0.0404661	1.20456
ENST00000347055	ENSG00000172086	KRCC1	8.27467e-13	1.12285e-10	0.835368	0.116728	6.48816	0.211775	0.00189809	0.0125593	0.0253528	0.0253528	1.20518
ENST00000382099	ENSG00000147852	VLDLR	3.75687e-12	4.70219e-10	0.835453	0.120278	6.84661	0.224223	0.00173825	0.0271952	0.0226561	0.0271952	1.2053
ENST00000336292	ENSG00000182253	SYNM	2.49495e-05	0.000854663	0.83569	0.198254	8.54349	0.266916	0.00104196	0.0775672	0.0231811	0.0775672	1.20565
ENST00000312214	ENSG00000174028	FAM3C2	2.55943e-07	1.37002e-05	0.837032	0.162426	6.37472	0.245405	0.00599427	0.0467704	0.026454	0.0467704	1.20758
ENST00000379799	ENSG00000145730	PAM	1.89364e-06	8.45247e-05	0.841062	0.176528	6.49963	0.255531	0.0121356	0.0501889	0.0252493	0.0501889	1.2134
ENST00000367419	ENSG00000055211	GINM1	4.30012e-11	4.50733e-09	0.849323	0.128815	6.75801	0.234546	0.0016482	0.0315385	0.0232202	0.0315385	1.22531
ENST00000232375	ENSG00000114268	PFKFB4	5.95421e-05	0.00184099	0.850561	0.211866	6.75865	0.28365	0.00196984	0.0878045	0.023216	0.0878045	1.2271
ENST00000295324	ENSG00000163171	CDC42EP3	1.39411e-06	6.39131e-05	0.850931	0.176328	6.19573	0.240547	0.0336437	0.00563342	0.0285395	0.0285395	1.22763
ENST00000396128	ENSG00000179454	KLHL28	2.63621e-09	2.02158e-07	0.850982	0.142955	5.8449	0.226541	0.0064255	0.0164825	0.034447	0.034447	1.22771
ENST00000617070	ENSG00000276600	RAB7B	5.23093e-11	5.40766e-09	0.851332	0.129693	6.5653	0.22243	0.00895974	0.00895343	0.0246808	0.0246808	1.22821
ENST00000393045	ENSG00000131788	PIAS3	1.88935e-09	1.49478e-07	0.853062	0.14201	6.3703	0.222022	0.0138338	0.00262097	0.0265	0.0265	1.23071
ENST00000305123	ENSG00000169047	IRS1	8.3209e-05	0.00246148	0.853319	0.216856	6.09296	0.288661	0.00355193	0.0905008	0.0299803	0.0905008	1.23108
ENST00000354232	ENSG00000105379	ETFB	1.60078e-05	0.000576256	0.853435	0.197813	5.08522	0.235363	0.0116115	0.020195	0.0666488	0.0666488	1.23125
ENST00000334793	ENSG00000186564	FOXD2	2.80723e-05	0.000950905	0.854209	0.203938	5.02105	0.236494	0.0111877	0.0214978	0.0719939	0.0719939	1.23236
ENST00000339562	ENSG00000153234	NR4A2	0.000176948	0.00478084	0.854851	0.22797	4.85355	0.278025	0.0150852	0.0656868	0.0888555	0.0888555	1.23329
ENST00000244763	ENSG00000124783	SSR1	1.00136e-14	1.67007e-12	0.855436	0.110535	6.91582	0.223393	0.00217425	0.0145273	0.0222615	0.0222615	1.23413
ENST00000315930	ENSG00000129682	FGF13	3.61981e-08	2.30148e-06	0.855697	0.155342	5.57174	0.224287	0.00660523	0.01099	0.0416572	0.0416572	1.23451
ENST00000473649	ENSG00000197448	GSTK1	0.00027816	0.00705431	0.85693	0.235755	4.80303	0.278532	0.0163246	0.0638532	0.0948362	0.0948362	1.23629
ENST00000354764	ENSG00000197121	PGAP1	2.02785e-06	9.01588e-05	0.857304	0.180461	6.83254	0.265819	0.00699428	0.0581382	0.0227412	0.0581382	1.23683
ENST00000286201	ENSG00000155760	FZD7	7.77625e-11	7.84729e-09	0.857365	0.131804	6.94542	0.239802	0.0013658	0.0333786	0.0221048	0.0333786	1.23692
ENST00000439227	ENSG00000160211	G6PD	5.19865e-08	3.17991e-06	0.857533	0.157508	5.81633	0.230908	0.0145458	0.00972622	0.0350717	0.0350717	1.23716
ENST00000297668	ENSG00000106714	CNTNAP3	9.03572e-08	5.28355e-06	0.858412	0.160597	5.79057	0.246339	0.0159251	0.0258467	0.0356579	0.0356579	1.23843
ENST00000359543	ENSG00000213853	EMP2	2.99968e-16	5.85353e-14	0.859503	0.105159	7.23001	0.22963	0.00117126	0.020482	0.0209457	0.0209457	1.24
ENST00000522111	ENSG00000253368	TRNP1	2.5194e-06	0.00011019	0.859912	0.182705	5.7722	0.268496	0.0053794	0.0613831	0.0360897	0.0613831	1.24059
ENST00000323871	ENSG00000089159	PXN	2.44563e-05	0.000840187	0.859938	0.203788	7.46354	0.282478	0.00289865	0.0801607	0.020438	0.0801607	1.24063
ENST00000468410	ENSG00000105856	HBP1	1.84431e-08	1.24015e-06	0.860235	0.152903	6.44125	0.248985	0.0209683	0.0228459	0.0257905	0.0257905	1.24106
ENST00000223210	ENSG00000106479	ZNF862	0.000497078	0.0115705	0.860295	0.247046	4.70699	0.270597	0.0146242	0.0543697	0.107439	0.107439	1.24114
ENST00000379086	ENSG00000072682	P4HA2	8.17554e-05	0.00242484	0.86069	0.218494	6.40305	0.283101	0.0693142	0.0140405	0.026165	0.026165	1.24171
ENST00000374315	ENSG00000162430	SELENON	1.15716e-08	8.11129e-07	0.860959	0.150889	8.37472	0.250815	0.00195576	0.043579	0.0221514	0.043579	1.2421
ENST00000287934	ENSG00000157240	FZD1	9.31945e-16	1.72417e-13	0.861084	0.10716	7.00654	0.222372	0.00116312	0.0111159	0.0218034	0.0218034	1.24228
ENST00000295958	ENSG00000163683	SMIM14	3.62991e-07	1.88926e-05	0.861682	0.169375	5.39409	0.249274	0.00915041	0.0341706	0.0482257	0.0482257	1.24314
ENST00000410087	ENSG00000188452	CERKL	4.13814e-10	3.67725e-08	0.86228	0.137993	6.14977	0.24508	0.00342162	0.0346625	0.029159	0.0346625	1.24401
ENST00000356537	ENSG00000147419	CCDC25	3.96021e-07	2.04285e-05	0.863289	0.170245	5.85256	0.262619	0.0122179	0.0457488	0.0342839	0.0457488	1.24546
ENST00000255977	ENSG00000133606	MKRN1	1.55652e-12	2.05853e-10	0.863837	0.122195	8.13864	0.238801	0.000688913	0.0291741	0.0211167	0.0291741	1.24625
ENST00000468303	ENSG00000001460	STPG1	9.83804e-06	0.000374039	0.864349	0.195523	5.64948	0.278993	0.00882505	0.0676335	0.0392973	0.0676335	1.24699
ENST00000467011	ENSG00000109689	STIM2	1.36863e-06	6.29581e-05	0.868207	0.179771	5.9603	0.270768	0.0322778	0.0323574	0.0321719	0.0323574	1.25256
ENST00000245817	ENSG00000125657	TNFSF9	0.000117339	0.00332303	0.868235	0.225421	4.83149	0.235415	0.0102152	0.0131587	0.0914139	0.0914139	1.2526
ENST00000261681	ENSG00000072415	MPP5	0.00076326	0.0166129	0.869015	0.258191	6.19615	0.239139	0.104791	-0.0775242	0.0285339	0.0285339	1.25372
ENST00000622082	ENSG00000070081	NUCB2	2.42891e-09	1.88395e-07	0.8693	0.145705	7.07252	0.252303	0.00232089	0.0401389	0.0215109	0.0401389	1.25413
ENST00000421459	ENSG00000026025	VIM	7.34328e-05	0.00220601	0.871119	0.219709	5.23545	0.299565	0.0198494	0.0766944	0.0562802	0.0766944	1.25676
ENST00000360689	ENSG00000033170	FUT8	0.000699513	0.0154438	0.871493	0.257095	4.79063	0.268976	0.035825	0.0248137	0.0963708	0.0963708	1.2573
ENST00000240328	ENSG00000121068	TBX2	3.72213e-05	0.00121463	0.871902	0.211417	7.50558	0.293828	0.00136681	0.0880276	0.0203873	0.0880276	1.25789
ENST00000316218	ENSG00000065485	PDIA5	7.05521e-09	5.10395e-07	0.873474	0.150869	6.72705	0.257008	0.00274463	0.0427785	0.0234336	0.0427785	1.26016
ENST00000278756	ENSG00000084234	APLP2	1.23482e-08	8.59533e-07	0.873938	0.153461	6.85072	0.245172	0.0244691	0.00697558	0.0226315	0.0226315	1.26082
ENST00000530349	ENSG00000176973	FAM89B	3.07051e-05	0.00102876	0.873991	0.209682	5.49976	0.286899	0.0438281	0.0362667	0.0441051	0.0441051	1.2609
ENST00000478013	ENSG00000118257	NRP2	4.00666e-10	3.56977e-08	0.874828	0.139888	6.5006	0.25221	0.00620644	0.0329309	0.0252406	0.0329309	1.26211
ENST00000449330	ENSG00000168758	SEMA4C	7.09651e-07	3.462e-05	0.875718	0.176602	5.97502	0.272575	0.00676561	0.055611	0.031908	0.055611	1.26339
ENST00000368404	ENSG00000169241	SLC50A1	5.29113e-05	0.00165963	0.876553	0.216841	5.20162	0.275554	0.0356719	0.0296925	0.0583679	0.0583679	1.2646
ENST00000215790	ENSG00000099992	TBC1D10A	1.97109e-05	0.000693704	0.881194	0.206458	6.83963	0.294929	0.00632614	0.0789241	0.0226981	0.0789241	1.27129
ENST00000348126	ENSG00000145730	PAM	6.60512e-13	9.10901e-11	0.88207	0.122725	6.91991	0.248119	0.00743589	0.022687	0.0222394	0.022687	1.27256
ENST00000328078	ENSG00000182890	GLUD2	9.52833e-08	5.53813e-06	0.88242	0.165387	5.4145	0.253478	0.00732907	0.02884	0.0473764	0.0473764	1.27306
ENST00000303221	ENSG00000170571	EMB	1.33193e-09	1.08793e-07	0.882555	0.145552	7.82824	0.258862	0.00072523	0.0416456	0.0204048	0.0416456	1.27326
ENST00000006053	ENSG00000006210	CX3CL1	1.88618e-15	3.36102e-13	0.88362	0.111167	6.78018	0.230521	0.00164334	0.00703615	0.0230727	0.0230727	1.27479
ENST00000396137	ENSG00000152409	JMY	7.96983e-12	9.40176e-10	0.884676	0.129356	6.08387	0.25147	0.00334802	0.02915	0.0301178	0.0301178	1.27632
ENST00000270776	ENSG00000142657	PGD	6.31197e-15	1.0793e-12	0.885538	0.113566	8.83308	0.239298	0.000201341	0.0175878	0.0255932	0.0255932	1.27756
ENST00000327578	ENSG00000078674	PCM1	6.54819e-08	3.93432e-06	0.885643	0.163912	5.96235	0.270162	0.013149	0.0405856	0.0321347	0.0405856	1.27771
ENST00000379939	ENSG00000172915	NBEA	8.95062e-07	4.28018e-05	0.886958	0.180518	5.60195	0.280633	0.0243168	0.0408566	0.0407071	0.0408566	1.27961
ENST00000245663	ENSG00000130584	ZBTB46	0.000444768	0.0105413	0.887323	0.252656	4.66343	0.269671	0.0139591	0.03821	0.113711	0.113711	1.28014
ENST00000380485	ENSG00000102048	ASB9	9.17579e-08	5.3516e-06	0.888601	0.166332	5.77393	0.270317	0.0192842	0.0328813	0.0360485	0.0360485	1.28198
ENST00000378279	ENSG00000205002	AARD	8.96415e-06	0.000344489	0.889425	0.200287	5.03401	0.262404	0.00936182	0.0330841	0.0708676	0.0708676	1.28317
ENST00000321196	ENSG00000179104	TMTC2	0.000189337	0.00507946	0.890965	0.238683	7.09542	0.324468	0.00888078	0.105059	0.0214171	0.105059	1.28539
ENST00000378026	ENSG00000136026	CKAP4	4.97585e-10	4.3531e-08	0.892189	0.143442	8.32402	0.262701	0.000363227	0.0407879	0.0218907	0.0407879	1.28716
ENST00000538274	ENSG00000135709	KIAA0513	4.21087e-06	0.000175006	0.892263	0.193941	5.6229	0.258501	0.0351531	0.00105425	0.0400731	0.0400731	1.28726
ENST00000369779	ENSG00000168679	SLC16A4	4.38748e-07	2.23881e-05	0.893614	0.176907	5.91016	0.277066	0.029478	0.0275838	0.033114	0.033114	1.28921
ENST00000332272	ENSG00000183196	CHST6	4.13054e-16	7.94577e-14	0.893662	0.109858	6.89784	0.236141	0.00177751	0.00751029	0.0223602	0.0223602	1.28928
ENST00000316660	ENSG00000141682	PMAIP1	8.45494e-05	0.00249351	0.894242	0.227477	6.9601	0.317184	0.00171673	0.101775	0.0220297	0.101775	1.29012
ENST00000360760	ENSG00000196141	SPATS2L	7.7297e-08	4.59527e-06	0.894434	0.166458	7.60372	0.276075	0.00557736	0.0498392	0.0203164	0.0498392	1.29039
ENST00000590320	ENSG00000267534	S1PR2	5.55368e-09	4.0776e-07	0.894643	0.153464	5.59493	0.258044	0.00617839	0.0280773	0.0409238	0.0409238	1.2907
ENST00000508779	ENSG00000113621	TXNDC15	9.86521e-10	8.17629e-08	0.898363	0.146994	6.12302	0.253104	0.0136765	0.0125924	0.0295378	0.0295378	1.29606
ENST00000284476	ENSG00000154309	DISP1	0.000636357	0.0143203	0.900132	0.263534	4.61104	0.305027	0.0171722	0.0686131	0.121728	0.121728	1.29861
ENST00000348108	ENSG00000092841	MYL6	4.36788e-12	5.40699e-10	0.903283	0.130443	7.19029	0.262289	0.00996428	0.0240664	0.0210709	0.0240664	1.30316
ENST00000559844	ENSG00000028528	SNX1	1.71556e-15	3.07317e-13	0.905128	0.113705	7.39067	0.256237	0.00103414	0.0248233	0.0205551	0.0248233	1.30582
ENST00000303921	ENSG00000170775	GPR37	7.83783e-05	0.00233799	0.911019	0.230678	5.41823	0.328352	0.00748424	0.0989407	0.0472241	0.0989407	1.31432
ENST00000528793	ENSG00000198055	GRK6	4.69149e-06	0.000193233	0.911938	0.199194	6.55259	0.305629	0.0176743	0.0616825	0.0247877	0.0616825	1.31565
ENST00000431877	ENSG00000138434	SSFA2	1.71844e-05	0.000612103	0.913704	0.212556	8.39069	0.315982	0.0108278	0.0795325	0.022238	0.0795325	1.3182
ENST00000296953	ENSG00000164463	CREBRF	9.03566e-10	7.56265e-08	0.914074	0.149222	7.10474	0.276896	0.00123955	0.0432951	0.0213801	0.0432951	1.31873
ENST00000431473	ENSG00000177181	RIMKLA	2.57579e-07	1.37768e-05	0.914943	0.177586	5.27067	0.263327	0.00882304	0.0193517	0.0542507	0.0542507	1.31998
ENST00000555925	ENSG00000072415	MPP5	1.35736e-12	1.80572e-10	0.917042	0.129373	7.05709	0.268969	0.00683906	0.0266359	0.0215763	0.0266359	1.32301
ENST00000306442	ENSG00000168938	PPIC	2.68365e-05	0.000911117	0.919417	0.218973	6.32617	0.323721	0.00267299	0.0932252	0.0269733	0.0932252	1.32644
ENST00000428084	ENSG00000128512	DOCK4	0.000936988	0.0198704	0.919433	0.277876	6.3853	0.289824	0.128085	-0.0717433	0.0263449	0.0263449	1.32646
ENST00000254190	ENSG00000131873	CHSY1	4.39101e-19	1.12199e-16	0.920292	0.103095	7.84046	0.250056	0.000837386	0.00858241	0.0204197	0.0204197	1.3277
ENST00000338779	ENSG00000132613	MTSS1L	1.6886e-05	0.000603662	0.922747	0.214466	4.98386	0.322124	0.0153251	0.0766664	0.0753635	0.0766664	1.33124
ENST00000321442	ENSG00000164466	SFXN1	1.33594e-14	2.20635e-12	0.922829	0.119812	9.08791	0.245282	0.000199343	0.00209194	0.0285103	0.0285103	1.33136
ENST00000381132	ENSG00000159200	RCAN1	3.02622e-05	0.00101594	0.926582	0.222123	7.62779	0.329882	0.00497569	0.0937015	0.0203092	0.0937015	1.33677
ENST00000393203	ENSG00000134247	PTGFRN	7.20404e-17	1.49177e-14	0.926648	0.11106	8.70396	0.265873	0.000259132	0.0237006	0.0244097	0.0244097	1.33687
ENST00000296932	ENSG00000112414	ADGRG6	5.25706e-11	5.42639e-09	0.926929	0.141226	7.78783	0.279676	0.0120223	0.027867	0.0203631	0.027867	1.33728
ENST00000261349	ENSG00000070018	LRP6	2.14002e-10	1.99597e-08	0.927909	0.146106	6.54093	0.282599	0.00330387	0.03939	0.0248872	0.03939	1.33869
ENST00000628182	ENSG00000281324	LRP6	2.14002e-10	1.99597e-08	0.927909	0.146106	6.54093	0.282599	0.00330387	0.03939	0.0248872	0.03939	1.33869
ENST00000332598	ENSG00000184840	TMED9	2.44342e-09	1.89036e-07	0.92939	0.155802	8.75582	0.288403	0.000465924	0.0480827	0.0248631	0.0480827	1.34083
ENST00000622186	ENSG00000131389	SLC6A6	2.19305e-08	1.44725e-06	0.929765	0.166147	7.55423	0.294312	0.00478562	0.050424	0.0203439	0.050424	1.34137
ENST00000358812	ENSG00000172469	MANEA	1.22896e-12	1.64135e-10	0.931596	0.131172	6.44837	0.277459	0.00248727	0.0319251	0.0257226	0.0319251	1.34401
ENST00000490424	ENSG00000163618	CADPS	0.00190353	0.0358636	0.931625	0.300051	4.42343	0.257414	0.0252186	-0.0142109	0.154843	0.154843	1.34405
ENST00000257497	ENSG00000135046	ANXA1	3.4136e-13	4.87054e-11	0.932015	0.128077	9.29372	0.276307	0.000143941	0.0326635	0.0315225	0.0326635	1.34461
ENST00000246069	ENSG00000125868	DSTN	4.99387e-07	2.53296e-05	0.933037	0.185622	5.32857	0.281213	0.0176912	0.0202043	0.0512197	0.0512197	1.34609
ENST00000286091	ENSG00000155660	PDIA4	2.7417e-11	3.0089e-09	0.933579	0.140181	9.61001	0.282707	9.65397e-05	0.0392049	0.0375687	0.0392049	1.34687
ENST00000546590	ENSG00000179104	TMTC2	8.99278e-08	5.26299e-06	0.933692	0.174653	6.54895	0.301372	0.017135	0.0438724	0.0248186	0.0438724	1.34703
ENST00000532933	ENSG00000175550	DRAP1	4.1114e-07	2.11386e-05	0.933869	0.184423	5.947	0.307481	0.0311736	0.0368502	0.0324152	0.0368502	1.34729
ENST00000360409	ENSG00000118257	NRP2	1.47121e-13	2.20399e-11	0.935923	0.126652	9.31586	0.259302	0.000195095	0.0103395	0.0318863	0.0318863	1.35025
ENST00000485303	ENSG00000177707	NECTIN3	4.23268e-12	5.24923e-10	0.937749	0.135333	6.33122	0.282647	0.00337293	0.0332572	0.0269178	0.0332572	1.35289
ENST00000264498	ENSG00000138685	FGF2	6.12235e-06	0.000245449	0.93785	0.207392	5.40061	0.325038	0.0341832	0.0518395	0.0479516	0.0518395	1.35303
	ENSG00000150630	VEGFC	0.00929371	0.0402068	0.938896	0.360967	2.58979	0.380521	0.12414	0.0259596	0.136455	0.136455	1.35454
ENST00000544001	ENSG00000129636	ITFG1	1.10675e-06	5.19344e-05	0.94073	0.193103	5.84353	0.316773	0.019561	0.0550168	0.0344764	0.0550168	1.35719
ENST00000237623	ENSG00000118785	SPP1	8.02921e-07	3.87238e-05	0.941054	0.190703	6.18054	0.315368	0.0127912	0.0599442	0.0287399	0.0599442	1.35765
ENST00000317568	ENSG00000126391	FRMD8	8.52299e-12	1.00194e-09	0.941679	0.137885	7.31308	0.281845	0.0173035	0.0159296	0.0207208	0.0207208	1.35855
ENST00000293662	ENSG00000161835	GRASP	0.000169801	0.00462123	0.943772	0.250992	5.34363	0.362482	0.0565869	0.0694072	0.0504914	0.0694072	1.36157
ENST00000298912	ENSG00000165959	CLMN	1.55287e-10	1.49361e-08	0.945811	0.147781	6.68164	0.293026	0.00236344	0.0413149	0.0237621	0.0413149	1.36452
ENST00000327245	ENSG00000118322	ATP10B	3.04652e-17	6.50753e-15	0.946359	0.112065	7.47496	0.277413	0.000895063	0.0242219	0.020423	0.0242219	1.36531
ENST00000267101	ENSG00000065361	ERBB3	1.04631e-07	6.01946e-06	0.946779	0.178016	8.3526	0.310437	0.000977892	0.0624018	0.022035	0.0624018	1.36591
ENST00000264832	ENSG00000090339	ICAM1	2.31093e-17	5.06409e-15	0.947317	0.111752	8.24651	0.277811	0.000445217	0.0245316	0.0215337	0.0245316	1.36669
ENST00000456264	ENSG00000144136	SLC20A1	3.85071e-05	0.00125067	0.948006	0.230308	5.15311	0.347705	0.0170598	0.0890235	0.0616067	0.0890235	1.36768
ENST00000599847	ENSG00000152439	ZNF773	1.3339e-11	1.51803e-09	0.949084	0.140295	5.82621	0.28076	0.00451263	0.0227875	0.0348528	0.0348528	1.36924
ENST00000556611	ENSG00000100852	ARHGAP5	1.37249e-05	0.000502083	0.952537	0.219064	6.23352	0.341503	0.0526499	0.043328	0.0280578	0.043328	1.37422
ENST00000298892	ENSG00000110888	CAPRIN2	1.64803e-05	0.000590126	0.952981	0.221216	6.35024	0.343369	0.0138649	0.0840085	0.0267119	0.0840085	1.37486
ENST00000355841	ENSG00000196923	PDLIM7	8.91101e-08	5.22869e-06	0.953431	0.17829	7.14356	0.314216	0.00304913	0.0605256	0.0212331	0.0605256	1.37551
ENST00000205061	ENSG00000090863	GLG1	2.26405e-14	3.65885e-12	0.954305	0.124996	7.00123	0.286983	0.00232657	0.0289215	0.0218284	0.0289215	1.37677
ENST00000479339	ENSG00000153721	CNKSR3	0.000788078	0.0170981	0.954922	0.284461	4.58784	0.31901	0.036389	0.0318313	0.125447	0.125447	1.37766
ENST00000619227	ENSG00000128346	C22orf23	1.35405e-05	0.000496677	0.957351	0.220021	4.98212	0.309656	0.0212919	0.0344663	0.0755264	0.0755264	1.38116
ENST00000379951	ENSG00000138795	LEF1	4.14996e-07	2.12884e-05	0.957523	0.189161	7.33388	0.323297	0.00342604	0.0681377	0.0206722	0.0681377	1.38141
ENST00000373782	ENSG00000136848	DAB2IP	2.62587e-07	1.40225e-05	0.957769	0.186029	6.67253	0.321418	0.0127362	0.0564774	0.0238302	0.0564774	1.38177
ENST00000321797	ENSG00000136153	LMO7	1.86151e-05	0.00065856	0.958884	0.223992	5.87632	0.309668	0.0665554	-0.0117622	0.0337894	0.0337894	1.38338
ENST00000367474	ENSG00000203727	SAMD5	4.77498e-07	2.42557e-05	0.959016	0.190465	6.87946	0.324963	0.00152993	0.0710235	0.0224639	0.0710235	1.38357
ENST00000550697	ENSG00000092841	MYL6	6.28009e-06	0.000250438	0.959487	0.212429	6.00095	0.340392	0.0417849	0.0484676	0.0314561	0.0484676	1.38425
ENST00000540010	ENSG00000056558	TRAF1	4.14169e-11	4.348e-09	0.960651	0.145577	6.1869	0.299958	0.0137299	0.0286038	0.0286554	0.0286554	1.38593
ENST00000324306	ENSG00000106261	ZKSCAN1	1.22589e-08	8.54876e-07	0.96165	0.168826	7.76	0.301761	0.0366638	0.00713412	0.0203409	0.0203409	1.38737
ENST00000467850	ENSG00000118257	NRP2	2.91271e-11	3.16578e-09	0.961784	0.144609	5.88657	0.293972	0.00824231	0.0263818	0.0335813	0.0335813	1.38756
ENST00000333305	ENSG00000182700	IGIP	2.22624e-10	2.06784e-08	0.961848	0.151595	5.61169	0.302939	0.00555212	0.0394924	0.0404098	0.0404098	1.38765
ENST00000389617	ENSG00000172986	GXYLT2	2.00128e-19	5.27287e-17	0.961961	0.106728	7.05994	0.281893	0.00121771	0.0192009	0.021564	0.021564	1.38782
ENST00000443517	ENSG00000229998	PPP1R18	7.9346e-10	6.70756e-08	0.962106	0.156536	5.63863	0.30285	0.00939684	0.0353783	0.0396102	0.0396102	1.38803
ENST00000437121	ENSG00000225060	PPP1R18	7.9346e-10	6.70756e-08	0.962106	0.156536	5.63863	0.30285	0.00939684	0.0353783	0.0396102	0.0396102	1.38803
ENST00000274853	ENSG00000146112	PPP1R18	7.9346e-10	6.70756e-08	0.962106	0.156536	5.63863	0.30285	0.00939684	0.0353783	0.0396102	0.0396102	1.38803
ENST00000367815	ENSG00000143153	ATP1B1	1.64055e-05	0.000588693	0.963149	0.223524	5.65173	0.350696	0.0585376	0.0413888	0.0392331	0.0413888	1.38953
ENST00000392870	ENSG00000198873	GRK5	5.57741e-16	1.06085e-13	0.963441	0.11897	7.17933	0.289469	0.000962759	0.0273448	0.0211075	0.0273448	1.38995
ENST00000222399	ENSG00000091136	LAMB1	1.23611e-09	1.01455e-07	0.964098	0.158686	9.18978	0.308735	0.00194526	0.0484175	0.0299207	0.0484175	1.3909
ENST00000265165	ENSG00000138795	LEF1	8.02986e-08	4.75285e-06	0.964395	0.179708	6.75331	0.321094	0.0166159	0.047974	0.0232521	0.047974	1.39133
ENST00000395080	ENSG00000118785	SPP1	3.26179e-08	2.09351e-06	0.964702	0.174551	7.15882	0.318131	0.00241682	0.0585191	0.0211784	0.0585191	1.39177
ENST00000439190	ENSG00000237155	IER3	2.09228e-08	1.38896e-06	0.965646	0.172308	6.34987	0.317318	0.000882189	0.0584977	0.0267159	0.0584977	1.39313
ENST00000450236	ENSG00000230128	IER3	2.09228e-08	1.38896e-06	0.965646	0.172308	6.34987	0.317318	0.000882189	0.0584977	0.0267159	0.0584977	1.39313
ENST00000416884	ENSG00000227231	IER3	2.09228e-08	1.38896e-06	0.965646	0.172308	6.34987	0.317318	0.000882189	0.0584977	0.0267159	0.0584977	1.39313
ENST00000435856	ENSG00000235030	IER3	2.09228e-08	1.38896e-06	0.965646	0.172308	6.34987	0.317318	0.000882189	0.0584977	0.0267159	0.0584977	1.39313
ENST00000529010	ENSG00000070081	NUCB2	0.000536973	0.0123674	0.966008	0.279064	4.76515	0.323411	0.056144	0.0101112	0.0996094	0.0996094	1.39365
ENST00000506310	ENSG00000169223	LMAN2	1.17919e-08	8.24009e-07	0.966588	0.169496	5.89224	0.278168	0.0239905	-0.0108915	0.0334675	0.0334675	1.39449
ENST00000376020	ENSG00000158352	SHROOM4	3.23055e-05	0.00107388	0.96684	0.232605	5.9985	0.346138	0.076712	0.015522	0.0314982	0.0314982	1.39485
ENST00000382100	ENSG00000147852	VLDLR	2.20882e-07	1.2023e-05	0.967155	0.186679	6.51982	0.326995	0.00326462	0.0664334	0.0250703	0.0664334	1.39531
ENST00000340852	ENSG00000101294	HM13	3.41663e-13	4.87054e-11	0.967335	0.132933	8.19502	0.297647	0.000930273	0.0344121	0.0213233	0.0344121	1.39557
ENST00000220931	ENSG00000104490	NCALD	3.97642e-05	0.00128769	0.968103	0.235614	5.15079	0.362945	0.0325905	0.0784377	0.0617691	0.0784377	1.39668
ENST00000303329	ENSG00000172379	ARNT2	1.65485e-17	3.68602e-15	0.968133	0.113687	7.96434	0.282405	0.00521895	0.0118262	0.0206306	0.0206306	1.39672
ENST00000262428	ENSG00000103187	COTL1	1.96654e-14	3.21643e-12	0.968398	0.126542	9.24895	0.291671	0.0012141	0.0264703	0.0308115	0.0308115	1.3971
ENST00000358387	ENSG00000113621	TXNDC15	8.25214e-10	6.94996e-08	0.968703	0.157769	6.10643	0.307548	0.0200025	0.0260083	0.0297798	0.0297798	1.39754
ENST00000306320	ENSG00000154153	RETREG1	2.76033e-05	0.000935954	0.969666	0.231292	5.68193	0.360351	0.00657944	0.100413	0.0383912	0.100413	1.39893
ENST00000383681	ENSG00000091972	CD200	4.99929e-07	2.53381e-05	0.970017	0.192987	6.23725	0.332685	0.0280476	0.0464402	0.0280116	0.0464402	1.39944
ENST00000455264	ENSG00000145730	PAM	0.00140997	0.028031	0.971158	0.30419	5.82875	0.307701	0.150266	-0.105665	0.0347969	0.0347969	1.40108
ENST00000262932	ENSG00000166997	CNPY4	8.25189e-06	0.000319291	0.974549	0.21858	6.03169	0.35326	0.00580731	0.0897473	0.0309418	0.0897473	1.40598
ENST00000337919	ENSG00000164683	HEY1	3.37202e-06	0.000143513	0.974714	0.209762	5.83528	0.317983	0.0533461	0.000944673	0.0346545	0.0346545	1.40621
ENST00000469893	ENSG00000160678	S100A1	0.000484038	0.0113293	0.9751	0.279443	4.51915	0.301297	0.0191015	0.015472	0.137076	0.137076	1.40677
ENST00000361972	ENSG00000198879	SFMBT2	4.59407e-08	2.84609e-06	0.975184	0.178398	5.23787	0.309697	0.00751551	0.0368036	0.056136	0.056136	1.40689
ENST00000261489	ENSG00000102804	TSC22D1	5.77508e-21	1.71512e-18	0.975499	0.103843	7.4543	0.289233	0.0011157	0.019123	0.0204508	0.0204508	1.40735
ENST00000374280	ENSG00000158008	EXTL1	1.83148e-17	4.03957e-15	0.976081	0.114779	7.35997	0.294794	0.00109654	0.0252519	0.0206156	0.0252519	1.40819
ENST00000377861	ENSG00000184226	PCDH9	1.17886e-07	6.67424e-06	0.976643	0.184386	5.20325	0.300207	0.00973199	0.0225662	0.0582641	0.0582641	1.409
ENST00000524717	ENSG00000184384	MAML2	9.11199e-09	6.48791e-07	0.976985	0.170015	6.37463	0.322266	0.00280721	0.0550027	0.026455	0.0550027	1.40949
ENST00000541377	ENSG00000074054	CLASP1	2.5049e-10	2.31397e-08	0.979088	0.154755	7.88638	0.314945	0.0102671	0.0376313	0.0204851	0.0376313	1.41252
ENST00000557522	ENSG00000139926	FRMD6	0.00131326	0.0264343	0.981667	0.305523	4.7177	0.315227	0.080739	-0.0341975	0.10595	0.10595	1.41625
ENST00000262844	ENSG00000101935	AMMECR1	1.75931e-13	2.60675e-11	0.98185	0.133296	6.23178	0.305896	0.00374336	0.0317925	0.0280795	0.0317925	1.41651
ENST00000509769	ENSG00000145390	USP53	5.04573e-08	3.09196e-06	0.982895	0.180358	7.46083	0.331787	0.00952925	0.0555287	0.0204417	0.0555287	1.41802
ENST00000382085	ENSG00000242110	AMACR	6.10023e-05	0.00187842	0.985404	0.245804	4.82136	0.291381	0.0282241	-0.0119532	0.0926152	0.0926152	1.42164
ENST00000542783	ENSG00000163659	TIPARP	9.70724e-08	5.62281e-06	0.988514	0.185389	6.479	0.292706	0.0433014	-0.0275314	0.0254364	0.0254364	1.42612
ENST00000584437	ENSG00000108375	RNF43	1.28608e-09	1.05301e-07	0.988553	0.162882	5.7648	0.306376	0.0167943	0.0148986	0.0362669	0.0362669	1.42618
ENST00000370963	ENSG00000170899	GSTA4	2.66433e-07	1.41831e-05	0.988571	0.192113	5.57319	0.342491	0.0158979	0.0579172	0.0416106	0.0579172	1.42621
ENST00000305409	ENSG00000171951	SCG2	7.50037e-09	5.41442e-07	0.988834	0.171099	5.92768	0.329555	0.00419969	0.0543499	0.032777	0.0543499	1.42659
ENST00000324460	ENSG00000044574	HSPA5	2.49441e-08	1.6194e-06	0.988929	0.177429	10.3794	0.295793	4.61803e-05	0.0190523	0.062916	0.062916	1.42672
	ENSG00000112715	VEGFA	8.2346e-07	9.97714e-06	0.988969	0.200613	5.69441	0.348438	0.00927396	0.0712176	0.0259604	0.0712176	1.42678
ENST00000335934	ENSG00000115129	TP53I3	2.07495e-12	2.6916e-10	0.992451	0.141187	5.90975	0.300398	0.00674538	0.0153998	0.033122	0.033122	1.4318
ENST00000246071	ENSG00000125870	SNRPB2	0.000196426	0.00524884	0.992622	0.266578	4.77426	0.388485	0.0436889	0.0811111	0.0984388	0.0984388	1.43205
ENST00000317829	ENSG00000166025	AMOTL1	0.000283698	0.00715324	0.992744	0.273502	6.94996	0.352532	0.127526	-0.0447518	0.0220814	0.0220814	1.43223
ENST00000474729	ENSG00000197965	MPZL1	8.12727e-08	4.80211e-06	0.995731	0.185622	5.50017	0.315085	0.0248212	0.012284	0.0440902	0.0440902	1.43654
[truncated: 1,007 more rows]

## Sheet: DEG MITFlowvsMITFhighTCGA
DEG MITFlowvsMITFhighTCGA
mRNA	logFC	FDR	HIGH	LOW	Delta
DCD	-9.88971	7.14013e-05	168.114	0.0227273	1662.59
SLC38A8	-9.11364	2.44778e-12	649.341	0.954545	5917.86
KRTAP19-1	-8.9317	1.33498e-23	229.523	0.272727	2050.03
CST5	-8.81449	1.39629e-09	954.295	1.97727	8411.63
PRDM7	-8.63537	4.47956e-33	1148.59	2.43182	9918.51
GAD2	-8.30151	1.04095e-06	130.568	0.25	1083.91
KRT71	-7.84482	0.000669891	75.5909	0.113636	592.997
TYRP1	-7.80836	2.32697e-17	124592	207.295	972858
DCT	-7.53253	3.36644e-32	53782.5	153.205	405119
TRPM1	-7.295	5.30052e-21	12038.2	14.3409	87818.6
KRT85	-7.19659	7.95449e-05	111.159	0.409091	799.967
KRTAP1-3	-7.16985	0.000307457	30.6818	0.0454545	219.984
ELSPBP1	-7.05298	2.51919e-08	53.0682	0.136364	374.289
ACCSL	-7.03712	9.06348e-39	132.227	0.818182	930.499
KRTAP9-2	-6.97065	7.89185e-11	58	0.25	404.298
SLC17A6	-6.9632	2.49643e-05	216.227	1.20455	1505.63
ABCC11	-6.68615	5.79825e-28	1322.77	11.0909	8844.26
PROM1	-6.51536	5.71038e-21	2076.61	21.5	13529.9
CST2	-6.29254	2.13031e-13	4415	39.0455	27781.6
OC90	-6.28659	1.13609e-09	221.636	1.11364	1393.34
KRTAP3-1	-6.14798	0.0071336	59	0.409091	362.731
ASB11	-6.11618	3.44572e-10	170.227	1.93182	1041.14
PKLR	-6.006	2.15216e-18	604	4.43182	3627.63
SLC7A4	-5.95686	3.85378e-19	1755.41	19.8864	10456.7
TEKT5	-5.80165	3.99522e-13	307.841	3.70455	1785.98
ABCB5	-5.7157	6.73445e-17	7798.23	151.364	44572.3
ARHGAP8	-5.66324	1.49018e-21	471.841	8.18182	2672.15
ATP6V0A4	-5.46174	8.81867e-18	1249.5	25.4773	6824.45
GLRA2	-5.28244	7.26854e-07	302.25	5.36364	1596.62
TRIM63	-5.19918	5.10854e-17	6219.55	101.432	32336.5
IP6K3	-5.1782	1.18053e-14	297.318	7.75	1539.57
TSPAN10	-5.15783	3.10409e-34	9040.95	146.977	46631.7
SLC16A6	-5.1326	3.62146e-24	5171.7	122.955	26544.3
CDH1	-5.07817	2.73762e-16	33042.7	314.045	167796
KCNJ13	-5.0446	1.18797e-18	1824.64	41.2955	9204.57
LDB3	-5.02057	6.36216e-33	2359.3	62	11845
KRT31	-5.01794	0.0018938	97.3409	2.93182	488.451
KRT34	-4.9699	2.75093e-05	33.4091	0.727273	166.04
C20orf26	-4.96012	3.67478e-15	795.068	21.7045	3943.63
SLC5A10	-4.95797	6.68859e-34	183.273	4.68182	908.66
OCA2	-4.94321	1.96723e-11	4220.59	57.0227	20863.3
NRG3	-4.86326	1.1848e-14	1156.64	32.0909	5625.02
ABCC2	-4.85523	4.6749e-21	2431.09	59.3182	11803.5
SCUBE1	-4.85408	6.95453e-11	533.182	13.7727	2588.11
PAEP	-4.84594	1.87157e-07	22671.7	625.977	109866
ALDH3B2	-4.84231	3.87524e-09	5285.57	59.7955	25594.4
BCAN	-4.83358	4.76423e-17	24557.3	614.341	118700
PRKG2	-4.80893	1.87722e-10	1170.14	31.2045	5627.1
NOX5	-4.79327	1.98196e-12	1081.07	28.0682	5181.85
PRODH	-4.75475	7.11716e-18	974.795	21.0227	4634.91
PLXNC1	-4.74522	5.60708e-60	17166	525.955	81456.6
FAM69C	-4.72542	1.50786e-16	1093.45	11.5682	5167.04
MITF	-4.69853	4.57312e-112	40048	1236.16	188167
SULT1C2	-4.68678	2.21895e-17	742.841	17.2045	3481.54
SYNPR	-4.64067	3.37899e-07	477.932	15.3182	2217.92
MLANA	-4.58438	1.18721e-12	68043.2	1539.34	311936
HES2	-4.57715	2.9979e-13	1028.14	36.1818	4705.94
GPR143	-4.53794	9.3547e-15	15690	334.659	71200.5
SPATS1	-4.51735	1.98196e-12	199.727	5.75	902.237
PCSK9	-4.50226	1.24506e-12	238.705	9.5	1074.71
MYLK3	-4.45474	5.67343e-21	312.205	11.3182	1390.79
KIT	-4.40361	2.3856e-16	11678.7	279.091	51428.4
KRTAP1-5	-4.39974	1.22765e-05	51.4773	2.02273	226.487
PSG4	-4.38905	2.4514e-06	101.75	4.18182	446.586
CA14	-4.34856	1.82591e-16	5745.64	161.341	24985.2
KRT83	-4.30215	0.000973949	15.4545	0.522727	66.4877
MAMDC2	-4.30165	1.91919e-12	1566.77	70.0227	6739.71
ATP2B3	-4.29196	6.92372e-08	137.591	5.34091	590.535
MCF2	-4.26998	2.242e-08	201.068	7.81818	858.557
FSTL4	-4.20303	1.03809e-16	213	7.18182	895.245
PRSS33	-4.18041	3.14842e-08	897.545	37.9545	3752.1
KCNN2	-4.15665	1.0927e-24	1212.91	49.2955	5041.64
CDK15	-4.08392	7.44939e-10	113.864	4.5	465.01
CHST9	-4.04821	3.21539e-07	1100.8	40.4545	4456.25
CA8	-4.04424	1.50927e-09	2131.36	81.4091	8619.75
SCIN	-4.01486	4.47288e-12	7467.57	393.795	29981.2
EFHD1	-4.00645	8.9613e-22	4550.41	206	18231
ESRP1	-3.98602	1.40711e-23	2384.11	132.636	9503.12
TTC39A	-3.97792	2.13071e-16	3876.73	203.795	15421.3
SLC6A17	-3.93225	4.22546e-14	13740.9	614.432	54032.7
STK32A	-3.88964	3.74288e-22	2847.41	163.705	11075.4
SV2B	-3.87338	2.18941e-12	2026.64	130.636	7849.94
ST8SIA6	-3.87335	3.17531e-11	308.455	18.0455	1194.75
SLC45A2	-3.86577	1.91524e-11	15207.3	286.455	58787.9
CABP7	-3.85643	1.86007e-12	191.795	12	739.645
GSG1L	-3.84442	1.47573e-05	288.955	14.3864	1110.86
BAAT	-3.81054	5.77071e-07	2573.82	196.568	9807.64
MCOLN3	-3.78527	3.63978e-12	3673.39	170.545	13904.7
LRRN4CL	-3.76493	9.72021e-16	4098.36	220.955	15430
GMPR	-3.76069	1.30521e-17	9907.16	371.341	37257.8
CRTAC1	-3.75663	2.16753e-08	9893.52	478.318	37166.3
GALNT3	-3.75553	1.22485e-24	2203.39	129.477	8274.88
CAPN3	-3.73415	8.87466e-22	22138.5	1380.25	82668.4
KLHL38	-3.68307	3.53147e-23	239.659	15.2045	882.681
TUBBP5	-3.63542	4.05913e-10	136.977	9.56818	497.97
CYSLTR2	-3.62266	1.01221e-09	972.386	62.25	3522.63
NR4A3	-3.60747	1.23606e-28	3460.77	240.068	12484.6
CABLES1	-3.60659	9.79744e-27	20819.1	1316.66	75085.9
FAT2	-3.57693	1.77309e-12	1250.5	95.0227	4472.95
TYR	-3.54715	9.06402e-09	71679.2	3164.95	254257
GYG2	-3.54153	4.36158e-19	13293.1	804.864	47078
LIN28A	-3.52268	0.000689371	665.386	48.0455	2343.94
DCDC2	-3.51382	1.24048e-14	336.25	23.1136	1181.52
GNAL	-3.48316	1.12767e-11	1439	82.1818	5012.26
PPM1H	-3.46235	2.42255e-42	4660.41	337.114	16136
BIRC7	-3.45869	2.30394e-13	6212.66	349.795	21487.7
LHFPL1	-3.4429	9.27718e-14	130.091	8.40909	447.89
TMPRSS13	-3.44094	1.78214e-10	624.909	37.2727	2150.28
DLL3	-3.4339	1.31582e-14	2484.66	146.023	8532.07
WDR63	-3.4269	3.88878e-11	788.273	54.8864	2701.33
SEMA6A	-3.38995	1.21931e-30	12156	883.114	41208.4
HPGD	-3.37611	1.28909e-11	2876.7	222.136	9712.07
CHGA	-3.36805	3.05246e-10	68.6818	5.70455	231.324
RDH8	-3.35596	1.3642e-06	446.909	31.7727	1499.81
OR7A5	-3.34926	4.35092e-07	222.5	20.0909	745.21
SLC24A5	-3.33983	5.3911e-12	12846.8	1012.95	42906.2
IRF4	-3.32734	1.08455e-17	9950	686.432	33107
PSCA	-3.2948	1.38179e-08	834.045	68.7955	2748.01
WFDC1	-3.27702	3.32117e-08	1760.34	141.773	5768.68
QPCT	-3.27183	2.76108e-15	36805	3200.18	120419
PNLIPRP3	-3.2637	0.000126437	211.114	17.7955	689.011
DRD2	-3.26283	3.11684e-05	400.841	36.3409	1307.87
MLPH	-3.24449	1.04863e-15	22404.7	1558.86	72691.9
FMN1	-3.22737	5.55105e-35	5333.02	495.773	17211.6
ANKRD30B	-3.21652	3.8707e-07	229.182	20.0909	737.167
EPHA5	-3.18874	1.35068e-10	645.273	62.25	2057.61
HBA1	-3.15182	0.000567347	1185.02	120.864	3734.98
KCNAB2	-3.13257	1.31005e-24	20049	1769.61	62804.8
ATP6V0D2	-3.12543	9.39957e-07	1392.11	128.977	4350.95
CDK2	-3.12474	2.99959e-35	43985.4	4061.09	137443
MAPK4	-3.12235	2.04016e-05	2419.68	191.932	7555.1
PPARGC1A	-3.11256	2.67973e-09	2073.98	210.977	6455.38
OVOL1	-3.09332	2.11585e-07	107.205	12.3182	331.618
GAPDHS	-3.09205	3.71999e-07	3569.95	273.795	11038.5
LGI3	-3.09108	1.81566e-07	2618.89	71.3864	8095.19
KCNH1	-3.04039	1.10102e-12	600.477	65.3636	1825.68
TTYH2	-3.03002	1.15603e-29	10677.8	1098.2	32353.8
GCNT2	-3.01385	8.521e-23	4871.77	479.455	14682.8
CDH3	-2.99099	6.87853e-08	11522.8	717.159	34464.8
NCCRP1	-2.97556	1.67065e-06	618.545	76.6364	1840.52
PIR	-2.94731	4.02096e-19	8626.09	792.818	25423.8
RAB38	-2.94394	1.8665e-20	10792.2	1092.55	31771.8
PKD1L2	-2.92912	4.88294e-09	263.25	32.9545	771.091
CRB1	-2.9223	0.000385796	472.523	47.5227	1380.85
KRT27	-2.91651	0.000447363	116.591	10.4545	340.039
RHCG	-2.91248	2.33237e-06	801	95.5455	2332.89
SLC30A2	-2.91133	5.17835e-10	184.841	23.6364	538.132
ENTHD1	-2.90977	2.08555e-06	2027.64	233.773	5899.96
SFRP5	-2.90828	4.17893e-05	131.091	11.7955	381.249
RTN4RL1	-2.90599	2.64878e-07	900.182	40.7045	2615.92
CASQ2	-2.90469	9.84061e-16	151.114	17.1136	438.939
ZNF704	-2.88537	2.1429e-24	3340.11	392.568	9637.47
BEST1	-2.88127	2.71548e-22	3713.89	423.318	10700.7
RAB6B	-2.87677	2.49648e-24	4588.61	519.659	13200.4
SOX6	-2.87442	2.32871e-11	4377.52	510.045	12582.8
SPTA1	-2.86939	2.1811e-08	137.114	15.2955	393.433
HRK	-2.86141	2.44239e-08	131.864	14.9318	377.316
CHRM1	-2.82669	0.000131647	315.023	40.1818	890.472
LRRC39	-2.82132	1.0544e-11	255.75	29.1364	721.552
TBC1D7	-2.82091	5.06021e-33	12243.5	1367.27	34538
SDCBP	-2.79603	7.31308e-50	103414	12267.3	289149
DAPL1	-2.77575	0.000202333	81.8182	10	227.106
NCKAP5	-2.77126	1.293e-16	721.864	95.5227	2000.47
TFAP2A	-2.76117	1.48531e-19	24834.8	3072.45	68572.9
DHRS2	-2.75757	1.53669e-07	674.682	77.4091	1860.48
CTNND2	-2.73507	0.00181888	568.523	66.2727	1554.95
GPRC5B	-2.72801	3.38109e-18	12570.9	1666.41	34293.6
PRRT4	-2.72333	9.28075e-07	368.682	47.6818	1004.04
DNAJA4	-2.69058	1.49673e-15	13987.9	1640.3	37635.5
MS4A15	-2.68711	0.00869977	282.273	29.8409	758.499
FAM167B	-2.67956	2.84419e-17	3407.2	383.727	9129.81
MYO1D	-2.66766	7.26812e-22	29510.3	2874.93	78723.4
SPRR2D	-2.66304	0.00249758	1323.57	176.432	3524.72
C2orf88	-2.65939	1.10276e-17	1553.09	206.205	4130.27
CEACAM1	-2.64384	4.69293e-08	15813.3	2104.48	41807.7
RASSF3	-2.64272	5.80787e-38	5451.52	732.159	14406.9
PDE3A	-2.63257	1.34225e-09	1227	178.477	3230.17
GREB1	-2.62999	2.36064e-16	7784.59	1040.34	20473.4
MAT1A	-2.62148	7.24733e-05	1649.86	233.614	4325.09
RFPL2	-2.6146	8.09419e-08	156.295	22.5227	408.651
ADCY2	-2.60854	0.000331731	1720.25	62.4318	4487.34
LAMA1	-2.60373	1.26667e-08	8913.52	1091.57	23208.4
PRTG	-2.60216	3.36261e-09	1838.48	246	4784.01
APOC2	-2.59956	8.7305e-06	8684.32	1083.3	22575.4
KIAA1024	-2.59945	1.28432e-12	1460.09	211.591	3795.44
PTPLA	-2.57996	1.96978e-14	970.364	138.886	2503.49
KLHL30	-2.55741	2.07335e-07	98.3409	14.8409	251.498
RAB27A	-2.55045	5.57716e-28	11920.8	1720.86	30403.4
ITPKB	-2.5245	8.61365e-25	31921.3	4293.89	80585.4
ATP10A	-2.52075	3.1726e-12	6751.34	947.727	17018.5
GOLGA7B	-2.51205	4.94929e-12	2670.7	379.591	6708.94
P2RX7	-2.51045	6.89917e-16	5153.27	788.25	12937
RGS20	-2.50047	5.13525e-14	2867.43	411.273	7169.92
ASAH1	-2.4995	1.84146e-37	50179.4	7462.73	125423
CITED1	-2.48716	4.26788e-09	3408.41	460.705	8477.27
ZNF703	-2.48272	3.67649e-18	3364.93	465.114	8354.17
C21orf91	-2.47681	2.91708e-15	5808.98	870.045	14387.7
TBC1D16	-2.47643	1.23606e-28	13561.3	1946.57	33583.5
PLEKHH1	-2.47532	2.0095e-16	8768.75	1412.8	21705.5
GPRC5D	-2.46756	4.0568e-05	21.0455	2.68182	51.9308
HES6	-2.45968	1.83495e-17	3762.3	481.591	9254.05
KRT13	-2.45699	0.00869806	5124.5	896.614	12590.8
NECAB2	-2.45423	9.12977e-06	228.773	31.7273	561.461
CD5L	-2.43984	0.00119806	255.386	35.5227	623.101
KCNQ5	-2.43971	7.50845e-09	1480.75	251.295	3612.6
OMG	-2.43149	3.77406e-08	90.8864	9.70455	220.989
SNCA	-2.42827	3.68387e-19	11221.5	1684.43	27248.8
KIF17	-2.42782	1.88052e-07	772.773	121.273	1876.15
CNNM1	-2.37785	4.23249e-08	921.432	147.068	2191.03
DDIT4L	-2.37409	2.85488e-07	447.159	69.8864	1061.59
FAM180B	-2.36889	3.50808e-10	103	16.5455	243.995
DIRAS3	-2.36736	9.83596e-06	269.955	48.3864	639.08
GALNTL6	-2.362	0.000576292	81.3864	13.0227	192.235
UBL3	-2.35912	2.1175e-33	23280.8	3867.14	54922.3
KREMEN2	-2.35548	1.33691e-11	385.977	62.7727	909.16
FGF9	-2.35546	0.00548143	64.7045	10.5909	152.409
MME	-2.35523	3.02348e-05	12191.4	2197	28713.5
SCML4	-2.35488	1.15741e-05	1361.43	146.091	3206.01
MET	-2.35041	2.65726e-08	21969.2	3868.05	51636.7
VEPH1	-2.34701	1.87996e-05	1999.91	350.795	4693.81
ISM1	-2.34645	3.18217e-07	686.455	113.136	1610.73
TEX15	-2.34444	0.000973348	296.114	45.8864	694.22
KLK4	-2.3367	0.00279133	129.25	16.5	302.019
SLC13A3	-2.33478	9.71101e-07	3407.5	607.25	7955.77
HPS4	-2.33332	1.18012e-44	15238.2	2524	35555.6
SLC7A5	-2.32658	2.02135e-17	72706.7	9352.39	169158
HBB	-2.32505	4.60329e-05	2268.7	364.386	5274.85
HPN	-2.3247	3.87193e-08	281.705	48.6136	654.877
IGSF11	-2.3194	2.36946e-10	5091.39	899.682	11808.9
TFF3	-2.31386	4.05147e-05	327.795	57.6136	758.473
KCNG3	-2.31285	1.53299e-07	178.909	30.5455	413.79
TPPP	-2.30776	1.10689e-08	1663.36	291.818	3838.64
CALN1	-2.30682	0.00320784	47.2727	6.63636	109.05
SLC24A4	-2.30523	1.2286e-05	503.068	75.7273	1159.69
REPS2	-2.30187	3.10124e-18	835.795	127.886	1923.89
WNK2	-2.30033	2.15155e-05	870.068	129.864	2001.45
RASEF	-2.2958	0.000104026	330.705	51.75	759.232
ZNF749	-2.29345	1.42328e-22	980.068	169.568	2247.73
KLK10	-2.28822	0.00126822	113.295	21.4773	259.245
SLC19A2	-2.28656	1.52583e-28	4172.68	737.432	9541.1
INPP4B	-2.28597	4.31496e-17	3807.77	626.023	8704.47
PKNOX2	-2.28237	2.41361e-08	3890.39	620.114	8879.32
FAM174B	-2.27561	2.52757e-14	3736.59	643.773	8503.04
NPM2	-2.26178	4.43193e-07	383.318	55.0227	866.981
PLEKHA5	-2.25702	3.15711e-20	6872.07	1210.98	15510.4
PHACTR1	-2.25626	8.89117e-15	1613	282.659	3639.35
MAPK8IP2	-2.24985	3.1541e-08	1569.52	296.136	3531.2
MYO10	-2.2452	3.01396e-20	50758.5	9224.89	113963
SLC44A3	-2.24327	1.18481e-11	1114.59	203.682	2500.33
PIP5K1B	-2.24265	3.41985e-06	237.295	40.0455	532.17
HSPA2	-2.23638	1.90852e-13	7210.8	1153.57	16126.1
LYST	-2.23398	2.32679e-18	24157.4	4334.07	53967
DAPK1	-2.2222	2.12715e-18	7778.45	1338.55	17285.3
AHCYL2	-2.20803	1.13375e-15	10671.3	1946.57	23562.6
ST6GALNAC2	-2.20646	8.69616e-11	10296.6	1877.11	22719
GDPD5	-2.20318	7.75619e-20	3511.68	595.386	7736.87
BNC2	-2.19949	1.02107e-20	4686.66	832.318	10308.2
CYP2U1	-2.19821	1.22889e-18	3525.73	643.545	7750.27
CBLN1	-2.19732	2.70004e-07	125.568	21.1818	275.913
ZNF280A	-2.1929	1.95696e-05	341.886	61.8409	749.722
PAX3	-2.19085	3.22337e-14	7717.34	1426.41	16907.5
RAMP1	-2.18814	6.93942e-05	1773.14	283.25	3879.88
GPR56	-2.1858	1.84813e-12	59719.4	9080.48	130535
SEZ6	-2.17049	0.000175139	9.22727	1.52273	20.0277
IL12RB2	-2.16628	1.24838e-07	3695.34	653.523	8005.15
HCG4	-2.16594	1.09369e-05	744.341	122.932	1612.2
SLC27A3	-2.16192	7.22861e-08	9929.61	1530.02	21467
FAM69B	-2.15053	5.71483e-11	4072.16	637.318	8757.29
CPEB2	-2.14207	1.06049e-23	8204.86	1549.32	17575.4
RASGRF1	-2.13655	7.23743e-06	1258.25	224.341	2688.32
CELSR1	-2.13283	3.00487e-09	7643.23	1510.18	16301.7
MCC	-2.13022	3.82224e-18	7209.61	1451.66	15358.1
IRX6	-2.12953	0.000106377	643.068	84.9318	1369.43
TDRD7	-2.12901	4.27237e-25	4953.8	938.705	10546.7
MBP	-2.12588	1.453e-08	33685.4	5880.45	71611.1
FAM163A	-2.11728	0.00315835	1057.66	215.318	2239.36
SLC1A4	-2.11658	1.17419e-13	15260.6	2748.32	32300.3
PAG1	-2.11198	2.47597e-17	9670.41	1889.48	20423.7
ACTL8	-2.10087	0.00932388	79	14.6591	165.969
HRASLS	-2.09911	0.0023191	160.886	32.7273	337.718
CDKL2	-2.09648	2.94753e-05	197.182	37.9545	413.389
DMKN	-2.09493	7.45889e-05	1495.73	323.318	3133.44
NARS2	-2.0933	4.17086e-18	4180.27	840.909	8750.57
MYO5A	-2.08951	6.95104e-20	33048.2	6904.5	69054.6
GPR85	-2.0874	4.30435e-09	740.841	150.523	1546.43
GPAT2	-2.08497	3.40446e-05	409.023	88.8182	852.8
HBA2	-2.08026	9.22565e-05	2408.14	429.477	5009.56
ST3GAL6	-2.06677	5.25585e-16	7620.7	1553.82	15750.3
BCAS3	-2.06166	2.69534e-19	6207.09	1248.61	12796.9
UNC5CL	-2.05498	5.63667e-09	240.886	46.2273	495.017
SGCD	-2.03774	2.00387e-09	8473.64	1765.27	17267.1
TPCN2	-2.03548	2.55117e-19	4324.14	892.864	8801.7
SCUBE2	-2.03347	7.66476e-05	3171.14	471.068	6448.4
CPN1	-2.02462	0.000783445	1216.36	236.5	2462.67
NEDD4L	-2.01847	1.88968e-17	15519.1	3168.39	31324.8
SLC6A10P	-2.01735	3.76057e-06	385.5	89.7273	777.687
ADAM11	-2.01471	7.44061e-06	689.614	156.432	1389.37
ATP11A	-2.0102	9.48373e-14	8436.86	1823.25	16959.8
UGCG	-2.00185	2.63198e-21	3945.11	879.977	7897.51
LONRF1	-1.98994	4.27237e-25	5386.91	1126.14	10719.6
ARSG	-1.97928	5.99485e-11	882.705	186.591	1747.12
SLC7A8	-1.97722	5.61479e-09	12644.9	2401.86	25001.9
FSTL5	-1.97287	0.00560442	1518.84	331.114	2996.47
RIPK4	-1.96724	3.61511e-05	5533.23	1143.2	10885.2
PFKFB2	-1.96569	5.51749e-23	5617.3	1239.32	11041.9
SCARB1	-1.9605	2.45672e-11	21741.8	3274.39	42624.8
PRUNE2	-1.95239	2.69066e-05	4626.91	978.523	9033.53
TMPRSS3	-1.95224	0.000180329	69.5455	14.4318	135.769
TESK2	-1.94594	1.27164e-15	1346.23	281.023	2619.68
C9orf91	-1.94389	5.6112e-30	5456.68	1191	10607.2
MCF2L	-1.92819	3.32556e-06	5203.91	939.432	10034.1
HHAT	-1.92795	2.1354e-16	1822.36	415.591	3513.42
EPHX1	-1.9269	1.77065e-10	12193	2366.39	23494.7
TRAF3IP2	-1.92537	6.9786e-17	4349.34	859.295	8374.08
WIPI1	-1.9247	2.3856e-16	11038	2421.07	21244.7
ASB9	-1.92329	5.32382e-10	1388	300.523	2669.52
ESR2	-1.92231	7.08832e-07	221.932	51.1364	426.622
RAB17	-1.92145	5.34319e-06	6011.84	1339.36	11551.5
CAP2	-1.92115	2.91834e-05	1953.34	413.591	3752.66
GPR137B	-1.91402	2.90933e-17	13789.8	3162.7	26394
SFTPC	-1.90834	0.00682033	103	14.1818	196.559
PRKD3	-1.90449	2.24342e-17	19748.8	4509.93	37611.4
FAM124A	-1.90368	5.95771e-12	480.045	83.6818	913.854
SORT1	-1.87997	4.77187e-17	36019.8	7966.93	67716.3
RBPMS2	-1.87947	5.45084e-06	1305.25	266.386	2453.18
STX3	-1.87609	8.87466e-22	7824.14	1802.77	14678.8
AFF3	-1.87573	1.00223e-06	3274.23	759.568	6141.58
HLA-G	-1.87275	2.50418e-05	1892.18	411.477	3543.58
SLC5A9	-1.87143	5.34296e-05	153.432	38.7273	287.138
RTN4R	-1.87057	3.1113e-06	1465.66	330.159	2741.62
AMOT	-1.86512	2.54678e-09	4543.75	1040.61	8474.66
BFSP2	-1.86233	0.00206579	54.2045	11.0909	100.947
C15orf59	-1.86085	3.3136e-05	143.545	27.75	267.117
STX7	-1.85895	1.38627e-22	15015.7	3354.36	27913.5
CARD14	-1.85617	2.23677e-11	450.977	100.636	837.092
RRAGD	-1.85548	1.75088e-16	5988.07	1419.41	11110.7
XG	-1.8413	2.33237e-06	238.023	58.4091	438.271
GNPTAB	-1.83357	1.70941e-26	16708.6	4018.77	30636.3
GSTP1	-1.83225	2.37546e-12	52686.2	11546.5	96534.3
BHLHE41	-1.82716	2.2495e-09	9407.84	2341.95	17189.6
GRM1	-1.82387	0.00168063	297.955	84.5455	543.43
KRT17	-1.8199	0.00553948	932.068	233.091	1696.27
NT5DC3	-1.81823	2.61408e-13	6943.98	1701.98	12625.7
OTUD7A	-1.81643	5.38785e-06	82.3864	18.2045	149.649
SYTL2	-1.81315	4.42293e-11	3068.02	770.886	5562.8
WDFY1	-1.81297	3.19667e-33	16788.3	4153.61	30436.7
TDRD3	-1.80624	5.74931e-13	4268.61	1021.57	7710.15
TCHH	-1.80402	0.00112191	464.477	116.182	837.925
AGAP11	-1.80177	2.07966e-05	109.886	27.1136	197.99
ZNF280B	-1.80132	3.69903e-11	1248.89	306.318	2249.64
SIRPA	-1.80085	2.40883e-13	27810.8	5931.57	50083
PRSS8	-1.79762	0.00621726	62.2955	18.3182	111.983
PLEKHG3	-1.79717	3.09116e-13	4718.75	1127.32	8480.41
GPNMB	-1.79172	1.25378e-09	133193	30471.4	238644
BCL2	-1.78261	1.81019e-11	4744.43	1104.05	8457.48
SH3BP4	-1.78215	3.04468e-11	9946.57	2457.05	17726.2
BAIAP2L1	-1.77725	2.22983e-06	2717.39	694.727	4829.47
ZNF689	-1.75941	3.7113e-13	2129.36	545.273	3746.43
CLCN7	-1.75836	2.89413e-19	33940	7580.09	59678.9
C19orf71	-1.75261	6.5284e-10	205.864	54.25	360.799
OTX1	-1.75233	1.55246e-06	174.159	41.2727	305.184
LRRC16A	-1.74991	2.65448e-10	3003.02	756.341	5255.03
PLCL1	-1.74174	3.64771e-07	1244.32	302.318	2167.28
USP51	-1.74116	1.08291e-11	530.273	138.614	923.288
NAV2	-1.73819	1.14158e-11	15768.3	4231.39	27408.4
NNT	-1.732	5.1814e-20	10820.7	2829.27	18741.5
GNAO1	-1.7255	1.94682e-05	1600.2	409.091	2761.15
PYGL	-1.72513	1.68898e-07	23933.8	6441.45	41289
PTPRR	-1.72272	7.40828e-05	176.682	48.4545	304.374
RDH12	-1.72163	0.000140616	74.7045	18.4545	128.613
EDNRB	-1.72067	3.30805e-08	59773.4	16062.8	102850
VAT1	-1.71763	8.38805e-20	83512.3	20297.9	143443
FAM149A	-1.71503	2.05217e-08	927.614	229.386	1590.88
ADRBK2	-1.71245	3.87524e-09	3491.68	920.955	5979.34
C8orf46	-1.70864	6.35416e-06	1116.05	291.182	1906.92
LZTS1	-1.70643	1.89665e-09	26325.1	6701.95	44921.9
FAR2	-1.70569	3.50603e-11	1708.32	442.841	2913.87
C10orf90	-1.70447	2.65417e-06	2202.57	583.932	3754.22
ZNF114	-1.70278	0.00014577	173.455	45.9773	295.355
LSR	-1.69854	1.53069e-05	1951.14	411.591	3314.09
LGALS3	-1.6984	1.48246e-11	41847.5	10704.6	71073.8
MAP7D2	-1.69433	0.00211849	337.659	82.5909	572.107
RAB32	-1.68965	2.10189e-15	6191.43	1590.09	10461.3
PI15	-1.68695	0.00140599	3803.11	1004.66	6415.67
GDF15	-1.68283	0.00020731	25933.1	5630.57	43640.9
SGK1	-1.68005	1.31187e-12	24734.3	6290.41	41554.8
MGAT5B	-1.67983	1.74773e-05	2789	614.909	4685.04
SALL4	-1.67709	0.000274083	306.023	74.9318	513.229
PSEN2	-1.66932	1.21072e-15	6954.75	1661.02	11609.7
CDK5R1	-1.66433	1.34631e-10	4678.5	1236.77	7786.58
MID1	-1.66218	1.26897e-08	3191.34	868.5	5304.58
GJA3	-1.66107	0.00015556	1225.82	354.568	2036.17
WIPF3	-1.65325	0.000217882	398.977	107.295	659.61
CYGB	-1.65087	9.36957e-06	8527.48	1885.95	14077.7
RGS12	-1.65032	1.00115e-11	8506.57	1924.64	14038.5
ALDH1A1	-1.64966	0.000125374	7592.86	2008.84	12525.7
HERC5	-1.64847	1.80883e-09	2786.84	743.023	4594.02
ABCD1	-1.64715	2.69662e-10	8869.89	2033.18	14610
HOOK1	-1.64315	0.00173675	900.409	233.045	1479.51
SUSD5	-1.64297	0.000507649	1359.68	366.409	2233.92
IL17D	-1.64204	1.22972e-05	457.932	119.477	751.944
ZDHHC11	-1.63855	5.5789e-05	116.75	30.3864	191.301
MXI1	-1.62961	8.73069e-15	8554.34	2276.91	13940.2
RAP1GAP	-1.62953	4.39553e-06	3125.75	768.682	5093.52
FNIP2	-1.62822	3.22372e-18	4713.77	1347.11	7675.04
CYTH3	-1.62762	6.05245e-13	21217.3	5551.3	34533.6
IL6R	-1.62457	6.24115e-10	2956.73	840.341	4803.42
VLDLR	-1.62322	2.53111e-09	4325.39	1250.02	7021.04
C1orf95	-1.62198	0.00120999	291.455	84.1364	472.732
VSTM2L	-1.61721	0.00125415	424.841	101.5	687.057
CHCHD6	-1.61412	6.61863e-10	2843.66	676.614	4590
SPIRE1	-1.61363	3.46213e-18	7307.91	2081.82	11792.2
USP54	-1.61286	6.87499e-21	5360.59	1527.39	8645.9
PTPRM	-1.61153	2.93625e-18	12781.5	3567.77	20597.7
RETSAT	-1.61108	2.10909e-12	13746.1	3257.23	22146
LONP2	-1.61094	7.98925e-22	13045.9	3741.64	21016.1
PNPLA3	-1.60829	1.17277e-05	582.523	169.705	936.864
FAM69A	-1.60811	8.3185e-12	1450.14	382.068	2331.98
PIK3CD	-1.60231	9.623e-09	9593.95	2508.59	15372.5
LRRC3	-1.60015	2.64958e-05	538.068	148.841	860.992
HOXD1	-1.59732	2.84509e-05	395.636	107.136	631.96
KLC3	-1.59459	7.01723e-05	131.682	42.5455	209.979
CTNNB1	-1.59435	1.02107e-20	104930	30310.5	167296
CDC42BPG	-1.5924	0.000290828	440.523	122.591	701.49
ADCY1	-1.59208	0.000387913	5620.14	1614.27	8947.68
FAM178B	-1.59148	0.00359999	2203.93	686.25	3507.5
DGCR5	-1.59008	0.00591449	305.545	96.6591	485.842
HSBP1L1	-1.58768	7.30837e-09	519.886	146.795	825.414
ADHFE1	-1.58348	4.35915e-09	351.614	98.3864	556.772
C5orf22	-1.58255	2.69924e-19	5193.98	1499.36	8219.72
MESDC1	-1.58155	1.19747e-16	7741.23	1979.75	12243.1
CADPS2	-1.57906	5.36069e-07	2542.73	689.909	4015.12
EPM2A	-1.57715	1.37104e-15	929.909	264.455	1466.6
SIRPB1	-1.56906	2.51703e-11	1780.86	463.705	2794.29
JPH2	-1.56891	0.000231019	123.159	35.5909	193.225
C1orf115	-1.56877	1.34971e-05	1611.55	413.159	2528.14
PLA1A	-1.56804	0.00601116	10337.4	2913.64	16209.4
ULK4	-1.56598	7.70537e-09	539.182	164.568	844.347
NHSL1	-1.56215	4.9489e-15	4250.27	1215.34	6639.55
SPINT1	-1.55796	1.37481e-05	2412.57	612.545	3758.68
SCD	-1.55764	1.01869e-10	67899	19021.1	105762
PDE3B	-1.55751	6.42137e-07	3296.34	918.227	5134.08
KCP	-1.55657	0.000315311	155.136	45.5455	241.48
C1orf85	-1.55647	2.007e-15	21082.9	5810.89	32815
AQP11	-1.55018	8.52981e-09	209.409	61.7045	324.622
FAM53B	-1.54992	5.8063e-14	10326.4	2930.48	16005
CNFN	-1.54956	0.000331669	143.068	45.7273	221.692
PAK6	-1.54322	0.000927181	384.568	107.25	593.473
ANK2	-1.54156	2.27499e-07	7740.82	2310.82	11933
NANOS1	-1.54153	2.24411e-07	2011.25	610.25	3100.41
APOLD1	-1.54003	1.25667e-07	3264.41	972.886	5027.29
PNMA2	-1.53982	0.000859121	1248.73	349.295	1922.82
RANBP10	-1.53977	7.62116e-20	6518.57	1878.66	10037.1
DUSP3	-1.5332	2.75614e-20	15571.8	4731.5	23874.7
KCNIP3	-1.53186	1.55137e-05	2239.43	541.409	3430.49
TNFRSF14	-1.53115	1.30797e-09	13739.8	3413.41	21037.7
HPDL	-1.531	5.17186e-06	830.795	261.795	1271.95
LNX2	-1.53013	1.59685e-17	1911.75	553.773	2925.23
STAM	-1.52797	2.2742e-19	4900.7	1480.3	7488.11
NBL1	-1.52164	1.6759e-07	23347.8	5737.34	35526.9
DERA	-1.51571	6.72441e-26	3963.09	1153.27	6006.88
SETDB2	-1.51568	4.75821e-21	2656.5	777.773	4026.41
SLC37A1	-1.5129	1.1346e-06	1345.18	383.364	2035.12
SYNGR1	-1.51233	9.53491e-09	8670.8	2452.61	13113.1
AFG3L2	-1.5085	1.53841e-24	10877.5	3281.39	16408.6
RNF144B	-1.49496	1.36048e-08	2400.09	703.455	3588.05
RBP7	-1.49414	3.53341e-05	637.25	192.909	952.138
MICAL1	-1.49302	4.84821e-09	8904.59	2387.61	13294.8
SLC16A7	-1.49067	5.40866e-05	293.727	91.1818	437.851
MAPT	-1.48999	0.000375383	675.841	230.614	1006.99
RPS6KA5	-1.48814	2.31898e-10	1481.52	455.818	2204.72
RUNX3	-1.48799	6.00117e-06	9946.55	2680.48	14800.4
C1orf116	-1.48793	0.000744405	152.205	52.4318	226.469
MAL	-1.486	0.00753168	3126.82	956.5	4646.45
CELSR2	-1.48528	5.4592e-07	11419	3054.75	16960.4
GPR161	-1.48062	8.9548e-08	3200.43	1004.27	4738.62
HSD3B2	-1.47915	0.00379166	7.97727	2.18182	11.7996
ANXA5	-1.47858	3.37602e-23	88120.3	26429	130292
TP53TG3B	-1.47828	0.00441308	241.568	64.0909	357.105
ANXA3	-1.47638	0.00740643	882.25	276.591	1302.53
PKD1L1	-1.47514	0.000363199	182.5	57.4773	269.212
RTTN	-1.47434	1.59941e-08	3364.68	1083.05	4960.69
TRAK2	-1.46873	9.34772e-19	13268.3	4185.3	19487.5
SOX13	-1.46833	1.30642e-09	8998.68	2635.25	13213.1
CHAC1	-1.46483	7.34873e-06	856.045	246	1253.96
EPS8	-1.46117	2.73358e-12	10289.2	3260.43	15034.3
SNX30	-1.45785	2.95944e-13	6456.91	1991.89	9413.2
CPEB1	-1.45613	0.000211078	1174.5	371.841	1710.23
ARID5B	-1.45604	3.62059e-10	8102.7	2546.2	11797.9
PHYHIPL	-1.45375	0.00279302	53.1136	15.25	77.2137
QPRT	-1.44953	6.55852e-06	6627.05	1843.8	9606.13
ATP8A1	-1.44941	0.000398309	1736.57	509.591	2517.01
DUSP10	-1.4469	1.34258e-07	3119.95	991.318	4514.25
SLC7A1	-1.4447	2.41294e-14	16086.6	5079.5	23240.2
IGSF3	-1.43777	7.21266e-06	29598.2	9112.48	42555.6
CCL28	-1.43752	3.74139e-10	667.318	191.318	959.284
ALDH1B1	-1.4369	4.01462e-07	4871.89	1564.91	7000.44
PIP4K2A	-1.43614	2.79727e-15	9077.55	2766.11	13036.6
FAM186B	-1.43414	6.82457e-10	94	29.0227	134.809
FBXO2	-1.43262	0.000171917	650.773	168.795	932.313
SLC25A13	-1.4325	4.34726e-14	8223.89	2557.91	11780.7
TEX14	-1.4318	0.00557678	143.182	35.7273	205.008
ILVBL	-1.43153	4.27908e-19	9865.41	3032.66	14122.6
CRYL1	-1.4307	2.27374e-08	5023.59	1532.43	7187.24
CLCN5	-1.42979	3.77036e-11	3898.64	1247.18	5574.22
MYC	-1.42893	3.40894e-12	13360	4443.77	19090.6
GPR133	-1.42787	0.00463595	402.727	134.136	575.042
OSTM1	-1.4221	3.83265e-12	11213.8	3630.45	15947.1
NAT8L	-1.41855	0.00052403	1829.02	569.932	2594.57
RENBP	-1.41816	6.3064e-09	6008.05	1726.73	8520.38
DYNC2H1	-1.41654	9.67667e-06	3230.14	1061.3	4575.63
FRK	-1.41507	2.7316e-06	81.1136	24.4091	114.781
SULT2B1	-1.41405	0.0048754	65.4318	23.8636	92.5237
QDPR	-1.41376	3.86556e-08	8765.7	2473.07	12392.6
GRTP1	-1.41342	0.000510108	245.682	78.7273	347.252
PRAME	-1.41033	2.92825e-08	42017	12858.6	59257.7
ATP6V1C1	-1.40762	7.09469e-18	12664.1	4194.02	17826.1
SOCS6	-1.40682	7.87696e-13	5433.95	1692.95	7644.59
ANKRD28	-1.4049	4.82389e-16	10072.9	3344.52	14151.4
ANKRD9	-1.39946	6.61863e-10	554.5	171.886	775.999
FYCO1	-1.39201	1.69154e-10	9663.77	3174.16	13452
SLC25A4	-1.39196	7.12344e-10	5758.93	1810.25	8016.23
ZFYVE16	-1.39121	2.44778e-12	9721.18	3306.59	13524.2
STXBP1	-1.3895	9.30716e-08	23410.8	6973	32529.3
DTX4	-1.38924	0.000104217	2734.55	803.273	3798.95
C10orf11	-1.38849	1.87693e-08	562.409	178.795	780.901
TGFBRAP1	-1.38629	8.55401e-18	3304.89	1117.05	4581.53
PLXNB1	-1.38616	1.06759e-06	5839.05	1772.86	8093.88
OSBPL1A	-1.38548	8.52237e-15	8326.66	2728.7	11536.4
SELENBP1	-1.38504	9.74531e-05	3519.7	1160.7	4874.93
SNTA1	-1.38503	1.90217e-08	3317.91	1005.61	4595.41
TM7SF3	-1.38324	8.94296e-14	15885.9	5353.98	21973.9
FAM65B	-1.38225	0.00161641	2916.84	843.386	4031.81
ELOVL7	-1.3814	0.000898593	411.682	132.636	568.697
FZD9	-1.38108	0.000744549	639	171.636	882.51
PIK3CB	-1.38076	1.98318e-16	4940.41	1643.25	6821.53
DUSP16	-1.37885	1.9354e-12	5640.07	1805.98	7776.82
HSD17B14	-1.37439	1.76813e-05	1542.75	432.523	2120.34
FN3K	-1.37115	9.08095e-07	3466.34	1058.7	4752.87
RASD2	-1.37006	0.000333064	691.909	220.455	947.954
PARD6G	-1.36597	8.91793e-12	1856.91	593.727	2536.48
RHOQ	-1.3651	8.89117e-15	18450.4	5953.75	25186.7
SWAP70	-1.3642	1.29701e-10	12134	4030.84	16553.2
LRRN2	-1.36278	0.00493937	205.182	66.2045	279.618
KCTD21	-1.3616	1.2783e-09	2126.66	686.295	2895.67
STRADB	-1.36034	1.48324e-14	2734.45	905.932	3719.78
C18orf56	-1.35711	7.6453e-06	143	45.4773	194.066
CTH	-1.35636	3.34891e-09	635.182	210.841	861.537
PHLPP1	-1.35319	9.2567e-10	7582.73	2428.18	10260.8
TRMT12	-1.35182	6.49039e-15	2370.82	809.909	3204.92
GANC	-1.3509	5.74931e-13	2694.93	868.568	3640.58
ZC3H12C	-1.34793	3.62673e-10	2181.23	740.727	2940.15
KIAA1244	-1.34711	0.000973752	517.091	170.114	696.576
BBS5	-1.34516	6.96766e-15	2146.98	731.068	2888.02
HIST3H2A	-1.34435	5.61558e-06	513.432	176.705	690.232
SLC39A6	-1.34389	1.1415e-12	21991.5	7540.55	29554.1
SAMM50	-1.34044	3.80993e-12	9205	3070.57	12338.8
TBC1D14	-1.33984	2.85283e-19	14017.8	4740.89	18781.5
WDR31	-1.33945	5.35738e-07	196.773	70.4773	263.567
SNAI2	-1.33803	4.31316e-05	5901.23	2174.2	7896.04
CASP1	-1.33574	0.000161698	2944.09	897.5	3932.53
PDZRN3	-1.3357	2.25801e-05	3009.14	986.705	4019.3
RASSF2	-1.33485	2.58848e-05	6403.93	1949.23	8548.3
AP3M2	-1.33465	4.36173e-16	5128.59	1721.91	6844.85
ZNF330	-1.33183	3.8491e-23	4017.27	1347.25	5350.31
FAM161A	-1.33151	1.21102e-09	937.295	314.545	1248.02
FMO4	-1.33146	3.35738e-09	601.386	195.409	800.72
DAAM2	-1.32987	1.0165e-05	16357	5738.68	21752.7
GPR89B	-1.32806	4.08641e-07	115.977	40	154.024
PLD1	-1.32774	2.78086e-08	3206.77	1076.07	4257.75
MSRB2	-1.32584	6.60478e-12	2523.91	759.045	3346.31
ETV5	-1.32454	2.37603e-12	26581.4	9008.39	35208
C9orf96	-1.32125	5.3136e-06	92.7955	32.75	122.606
IRX3	-1.31897	1.29418e-05	805.795	260.636	1062.82
TIMM50	-1.31877	2.44324e-13	9447.25	3033.57	12458.7
NLK	-1.3172	9.99118e-13	2896.45	989.023	3815.21
NEU3	-1.3139	5.1491e-09	761.636	274	1000.71
OSBPL9	-1.313	7.77855e-18	10830.5	3684.64	14220.4
MYEF2	-1.31289	5.66721e-07	6386.36	2174.57	8384.59
AVPI1	-1.31226	5.88682e-06	3501.07	1076.98	4594.31
FBXL7	-1.30944	8.76043e-05	3371.95	1094.8	4415.39
SEPT4	-1.30766	5.09038e-05	2450.27	745.523	3204.13
TEX2	-1.30638	2.4108e-12	10997.7	3921.57	14367.1
TACR2	-1.30394	4.46002e-08	129.295	44.1818	168.593
PLEKHA2	-1.30351	1.1467e-08	8644.02	2849.91	11267.6
FBXO32	-1.30259	2.71375e-07	5090.07	1741.23	6630.28
PRKCE	-1.29903	6.53866e-14	3098.95	1079.57	4025.62
ZMYND12	-1.29832	8.03696e-07	201.045	70.1364	261.021
POU3F1	-1.29767	0.00636139	1008.11	376	1308.2
ADPRHL1	-1.29501	0.00134115	154.159	53.5909	199.637
GPR158	-1.29443	0.00910716	991.273	351.341	1283.14
ZNF697	-1.29436	6.62485e-07	9401.91	3404.73	12169.5
DAB2	-1.28961	3.35046e-09	14681.1	5063.77	18932.8
CTSF	-1.284	4.54662e-07	10506.8	3533.75	13490.8
CDC16	-1.28191	1.93483e-13	9953.5	3335.43	12759.5
DCLK1	-1.27765	0.00248706	3422.5	1192.09	4372.76
L3MBTL4	-1.27633	0.00166947	605.545	205.659	772.875
PRCD	-1.2741	0.000222579	150.636	48.0227	191.926
CYP27A1	-1.27066	8.72128e-07	17576	5041.5	22333
PRELID2	-1.26908	2.52897e-06	317.5	112.136	402.932
FARP2	-1.26832	1.69289e-07	7104.02	2609.84	9010.16
MOSPD1	-1.26601	6.66518e-14	1993.36	727.5	2523.62
WNT4	-1.26587	0.00825938	363.091	120.023	459.627
ZNF608	-1.2651	0.000121936	1652.93	573.795	2091.13
ZFYVE26	-1.26414	2.47597e-17	6864.34	2425.18	8677.46
TMEM144	-1.26379	1.46827e-06	790.25	285.864	998.71
MSC	-1.26368	0.00238397	2610.59	813.091	3298.95
ADCY9	-1.26168	1.56928e-11	4605.7	1647.57	5810.95
HIPK2	-1.26069	7.13817e-09	13205.9	4436.64	16648.5
SEPT3	-1.26053	0.00266131	4347.05	1739.09	5479.59
NIPAL2	-1.25786	1.22541e-05	704.227	265.409	885.82
AP1S3	-1.25681	1.69018e-06	841.409	302.795	1057.49
AHRR	-1.25649	0.00103364	673.705	231.045	846.503
KIF6	-1.25644	0.000226238	560.591	201.682	704.346
MDM2	-1.25561	7.74338e-07	14317.8	5033.23	17977.5
HEATR5A	-1.2536	1.31946e-11	5477.86	2033.11	6867.05
PLEKHF2	-1.25046	8.77635e-09	3038.75	1087.91	3799.82
CRYAB	-1.24986	0.00435015	17094.3	6322	21365.5
FEM1B	-1.24916	5.28943e-15	11860.3	4349.84	14815.5
DIP2C	-1.24862	1.36244e-09	7604.43	2857.41	9495.03
HILS1	-1.24669	0.000416836	734.818	239.932	916.088
CYP7B1	-1.2463	0.00257638	857.227	323	1068.36
FDFT1	-1.24537	1.18927e-11	18551.1	6505.18	23103.1
DFNB31	-1.24503	1.29928e-08	2915.75	1016.43	3630.18
DUSP22	-1.2436	3.48498e-11	5371.27	1892.91	6679.72
SPSB1	-1.23763	1.42815e-07	5217.43	1863.48	6457.24
MREG	-1.23697	2.57959e-05	5287.34	1831.3	6540.3
TULP4	-1.23695	1.88157e-12	6245.77	2272.93	7725.73
TPD52L1	-1.2344	0.00670671	1103.75	388.909	1362.47
IQGAP2	-1.23438	0.000123219	2568.93	920.295	3171.03
PPFIBP2	-1.23383	6.72052e-08	3090.82	1060.09	3813.53
VAV3	-1.23277	0.00356919	1933.18	683.545	2383.16
PPM1K	-1.23108	2.48267e-07	1809.89	644.455	2228.11
RNLS	-1.23107	5.89933e-05	495.5	179	609.995
KLHDC8B	-1.22941	5.4236e-08	4282.64	1479.61	5265.11
GSTA4	-1.22792	2.11961e-05	2361.57	870.159	2899.81
LRRC16B	-1.22755	0.000614574	192.114	70.2045	235.83
REV3L	-1.22665	1.42815e-07	5042.3	1846.48	6185.12
VANGL1	-1.22174	2.21628e-11	4497.82	1656.25	5495.15
RNF150	-1.21958	0.00221854	895.091	346.955	1091.64
PTTG1IP	-1.21877	6.61551e-14	60847.6	22447.9	74159.1
SOAT1	-1.21778	6.54135e-09	7452.45	2865.68	9075.41
B3GALTL	-1.21547	9.72256e-14	2385.11	875.5	2899.02
SLC6A12	-1.21544	0.001316	258.636	93.1364	314.356
OTUD7B	-1.21347	3.4209e-13	8608.16	3271.34	10445.7
LPIN3	-1.21094	4.58396e-06	1383.18	513.614	1674.95
SNX8	-1.20722	2.18702e-14	5895.7	2170.84	7117.4
FAM101B	-1.20675	1.23639e-05	5753.86	2121.66	6943.48
RAI1	-1.20573	4.32406e-13	10585.3	3779.48	12763.1
MRPL44	-1.2057	1.30857e-19	5010.05	1861.52	6040.59
ST6GALNAC3	-1.20359	0.000639823	1578.18	561.25	1899.49
BAMBI	-1.20308	0.000374053	10520.6	3801	12657
PHGDH	-1.20217	0.00640719	16619.1	5305.5	19979
BACE2	-1.20061	8.56797e-07	30328.9	11491.9	36413.2
HEBP1	-1.20023	1.97956e-13	3943.09	1414.73	4732.62
ST3GAL4	-1.19936	1.12066e-08	16755.3	6067.5	20095.6
PHYHD1	-1.19805	0.00316179	333.136	116.068	399.114
DMXL1	-1.19765	6.38872e-09	4673.48	1755.95	5597.18
ZC3H13	-1.19613	4.48075e-06	26538	9557.8	31742.9
NPHP4	-1.19379	1.10017e-07	2926.11	1096.32	3493.15
ST7	-1.19105	2.69445e-10	4398.93	1601.68	5239.36
ATP6V1B2	-1.18982	8.61613e-13	28446.5	10445.8	33846.3
MPDZ	-1.18972	8.66367e-08	4554.55	1733.89	5418.64
ZBED3	-1.18661	5.66885e-06	220.864	82.4091	262.078
MMACHC	-1.18648	1.49901e-08	1694.2	643.318	2010.14
KIAA1522	-1.18407	2.22409e-06	2820.18	1073.05	3339.29
ALDH4A1	-1.18303	4.87474e-08	3830.32	1391.98	4531.37
HOMER2	-1.18287	0.0012972	738.182	252.75	873.17
HSD17B8	-1.18225	1.32982e-06	951.795	336.341	1125.26
GSTO1	-1.18189	9.414e-09	14223.6	5292.41	16810.7
SLC15A4	-1.18185	6.82581e-11	5303.07	1995.2	6267.43
PINX1	-1.18078	6.86809e-12	1185.64	435.727	1399.97
C15orf37	-1.17967	1.89869e-11	557.614	209.75	657.798
STARD10	-1.17964	4.66019e-10	1836.73	643.386	2166.68
CDS2	-1.17929	7.99995e-18	5492.27	2024.84	6477
SYNE2	-1.17878	8.65546e-08	10758.2	4001.84	12681.6
RHOBTB3	-1.17515	8.85887e-06	13875.2	5115.8	16305.4
TMEM192	-1.17478	3.07716e-11	3364.48	1308.89	3952.51
ARSI	-1.17357	0.00932269	1257.98	479.091	1476.33
KLF15	-1.17336	6.56832e-05	988.659	370.932	1160.05
PELI2	-1.16856	4.68023e-06	1491.11	532.705	1742.46
SYDE2	-1.16615	0.00063082	230.818	86.8409	269.17
TMEM98	-1.16599	0.000347255	8204.89	2921.91	9566.82
EPS8L2	-1.1658	0.00609836	1309.16	497.591	1526.22
H2AFJ	-1.16469	1.49771e-05	5332.55	1713.07	6210.76
HAGHL	-1.16463	2.07646e-05	1229.48	415	1431.88
XYLB	-1.16289	8.81701e-08	1528.48	606.545	1777.46
CAPG	-1.16194	0.00550463	18475	5921.95	21467
NIN	-1.16107	1.00884e-10	13646.6	5221.16	15844.7
NCOA2	-1.1596	3.86485e-08	2835.55	1126.43	3288.09
FARP1	-1.15934	6.72052e-08	14977.8	5501.48	17364.4
EPB41L3	-1.1592	3.58085e-05	6295.07	2359.64	7297.21
EGLN1	-1.1575	1.2696e-10	11255.5	4285.2	13028.2
METTL9	-1.15706	7.14178e-10	18149	7160.91	20999.5
SLC39A11	-1.15674	2.11994e-09	2143.84	810.045	2479.86
ATP1A1	-1.1511	6.39573e-09	246257	91541.8	283467
ERC1	-1.15067	1.94167e-12	11084.4	4376.11	12754.5
KIAA1211	-1.14946	5.42146e-06	3176.98	1254.23	3651.82
RAB5B	-1.14719	1.67406e-11	24312	8992.8	27890.6
UHRF1BP1	-1.14693	1.32206e-09	4439.34	1773.95	5091.63
TMCC2	-1.14222	1.61988e-06	3145.66	1166.36	3593.04
PITRM1	-1.13857	1.18884e-11	10487.3	3952.75	11940.6
TTC7B	-1.1373	7.2963e-11	4197.52	1660.52	4773.84
CHSY3	-1.13331	0.000929235	854.341	338.75	968.233
SMPD2	-1.13293	1.88341e-08	1023.27	345.841	1159.29
FBXO25	-1.1327	1.11388e-11	2289.3	860.136	2593.1
ALDH6A1	-1.13213	5.0503e-08	1482	605.591	1677.82
EHHADH	-1.12989	3.81263e-12	1456.59	586.886	1645.79
RHOBTB1	-1.12856	3.56944e-07	1931.75	751.318	2180.09
NRG2	-1.12704	0.000431879	340.727	134.682	384.013
EIF4EBP3	-1.12622	1.8335e-06	1200.91	438.886	1352.49
IGSF8	-1.12474	2.47462e-06	19919.2	7219.55	22404
TMC6	-1.12034	3.12051e-05	7131.2	2492.2	7989.38
TMEM51	-1.11855	3.54715e-07	3883.11	1465.66	4343.45
DAAM1	-1.11744	2.65417e-06	2103.91	845.636	2350.99
GDPD1	-1.11654	0.000102632	266.818	103.795	297.913
DHX33	-1.11601	2.22916e-07	3840.75	1548.64	4286.3
CNTF	-1.11544	7.71356e-05	105.523	40.5455	117.705
ADIPOR2	-1.11523	3.28174e-17	13713.2	5352.59	15293.4
CD44	-1.11506	1.25998e-06	93179.8	37355.2	103901
PGBD5	-1.11142	0.00293669	548.523	204.386	609.638
SLC25A16	-1.11038	1.68457e-08	912.227	375	1012.92
ACACB	-1.10775	1.48141e-06	1772.98	677.818	1964.02
KIF13A	-1.10553	5.04457e-08	7862.95	3255.39	8692.76
WDR81	-1.10487	5.93403e-11	9828.64	3837.5	10859.4
SLC3A2	-1.10487	1.722e-08	29534.7	10089.7	32632
STAT5A	-1.1046	2.59339e-08	8286.09	3195.36	9152.81
BFAR	-1.1021	4.30456e-15	11217.7	4470.93	12363
TRIM2	-1.10087	0.000154948	10906.2	4443.61	12006.3
AP1S2	-1.10028	7.20951e-06	20543.7	8261.02	22603.9
COL4A3BP	-1.09689	5.32382e-10	5855.41	2330.2	6422.73
TMTC1	-1.09665	0.00395245	2288	860.068	2509.14
ROPN1B	-1.09415	0.00685517	1189.61	426.523	1301.61
F11R	-1.09397	6.93942e-05	5065.34	2023.52	5541.31
PARD3B	-1.09284	0.000803315	285.295	115.25	311.782
KAT2B	-1.09189	4.41925e-06	5253.8	2137.45	5736.56
KIAA1467	-1.09036	1.36528e-08	1583.45	636.773	1726.53
TMEM97	-1.08693	1.9292e-06	4231.02	1582.7	4598.82
USP32	-1.08671	1.81204e-10	7909.8	3253.82	8595.65
HES4	-1.08654	0.00256509	182.659	69.9773	198.466
ARHGEF37	-1.0855	0.00831166	704.614	289.182	764.858
AMDHD2	-1.08384	2.10792e-07	2626.64	1033.52	2846.86
SIRT5	-1.08288	6.51607e-10	1595.61	642.636	1727.86
ALDH9A1	-1.08116	2.42337e-16	9674.34	3935.77	10459.5
ATP7A	-1.08046	4.77204e-07	3561.27	1477.34	3847.81
WNK3	-1.07846	0.001841	261.955	107.341	282.508
VPS33B	-1.07587	1.84987e-14	2541.25	1007.3	2734.04
BEND7	-1.07573	0.0088128	454.568	164.864	488.993
DMXL2	-1.07529	1.52507e-07	5487.27	2244.64	5900.39
SERPINB9	-1.07468	0.00936185	4351.39	1876.8	4676.36
CLYBL	-1.07356	2.5809e-06	339.955	133.182	364.961
SLC6A8	-1.07332	3.11879e-08	17007.3	6826.95	18254.3
ZBTB10	-1.07066	1.46142e-06	2917.7	1221.82	3123.86
ABCA5	-1.07024	0.000370071	1873.43	750.955	2005.03
BCL2A1	-1.07002	0.00514917	3921.55	1559.32	4196.12
SLC2A9	-1.06999	0.00212924	206.091	82.8636	220.515
AIFM3	-1.06945	0.00196096	114.045	47.6364	121.966
SAMD4A	-1.06846	4.05484e-08	4327.68	1746.64	4623.94
EXOC6B	-1.06706	3.12574e-07	1069.61	448.886	1141.34
GPR19	-1.06585	5.10214e-05	444.432	180.25	473.697
SLC11A2	-1.06495	6.74483e-08	7158.5	3016.98	7623.47
RPP25	-1.06222	1.93053e-05	3518.68	1399.64	3737.6
IFT81	-1.06078	1.39893e-06	2431.8	1014.16	2579.6
NLGN1	-1.05905	0.00825288	1553.55	661.909	1645.28
GFOD1	-1.05839	2.69244e-05	225.295	97.3182	238.45
KIAA1598	-1.0582	8.32403e-05	4823.48	1994.23	5104.19
IL16	-1.05782	0.00243268	6230.66	2107.57	6590.93
FLYWCH1	-1.05583	1.60192e-11	5215.98	2099.3	5507.17
MRPS25	-1.05577	1.20028e-11	5390.18	2140.3	5690.8
ASRGL1	-1.05496	0.000205445	1078.07	411.409	1137.32
NHLRC1	-1.05494	0.00147951	499.568	208.864	527.012
FAM83H	-1.0532	1.91446e-05	3517.68	1447.09	3704.83
TBC1D4	-1.05225	0.00210848	8157.23	3218.57	8583.45
CHAF1B	-1.05197	1.54061e-07	1576.75	653.068	1658.69
ECHDC3	-1.04947	1.04849e-08	666.205	280.886	699.163
FBXO7	-1.04936	6.08757e-12	25173.4	9852.05	26416
LIMS2	-1.04861	0.00200738	1770.07	712.409	1856.11
PIK3R3	-1.04653	1.51429e-05	4437.3	1752.27	4643.78
BTD	-1.04428	1.6707e-09	2047.93	814.182	2138.62
GAB2	-1.04425	7.94502e-05	9739.07	4028.59	10170.1
OSGIN1	-1.04397	0.000434324	1366.75	493.614	1426.84
OBSCN	-1.0424	0.00267372	1562.05	625.727	1628.27
ATP6V1H	-1.04156	3.22875e-15	6840.55	2825.14	7124.81
ALG8	-1.03948	1.10998e-05	5666.55	2295.93	5890.25
ALX1	-1.03833	0.00120192	1328.68	512.955	1379.61
ADCK1	-1.03784	3.97522e-10	1118.45	435.568	1160.78
PGRMC2	-1.03759	1.38543e-11	6414.41	2717.43	6655.51
MTSS1L	-1.03691	1.89976e-05	9821.09	4182.84	10183.6
PARVB	-1.03638	9.48215e-08	9321.02	3685.66	9660.1
PLB1	-1.03541	0.00833955	495.295	199.955	512.836
ETNK2	-1.0349	0.000233409	3468.48	1314.84	3589.51
EIF3C	-1.03301	6.27557e-05	2795.93	1245.52	2888.22
SLC26A1	-1.03288	0.000130186	120.159	50.9318	124.109
TRPV2	-1.02957	0.000277976	11835.7	4833.82	12185.6
TMEM220	-1.02835	1.215e-05	469.955	192.114	483.28
BDH1	-1.02719	0.000119603	1616.8	650.295	1660.76
PARVA	-1.02707	7.06792e-11	11298.9	4758.7	11604.7
H2AFZ	-1.02703	2.04521e-10	26206.4	10581.6	26914.7
DDI2	-1.02538	3.21185e-07	529.409	228.455	542.847
FABP3	-1.02534	0.000112254	652.932	239.273	669.479
MTL5	-1.02503	0.00318471	134.773	58.8182	138.146
ANKRD44	-1.02383	5.22125e-06	1347.86	572.886	1379.98
RCHY1	-1.02363	5.9238e-08	2144.55	889.932	2195.22
HSD17B1	-1.02342	0.00649419	902.432	427.523	923.569
NT5DC1	-1.02042	1.52011e-08	2026.2	825.068	2067.59
ACSL1	-1.01746	6.9864e-08	6512.23	2686.75	6625.91
PIGA	-1.01609	1.2703e-07	1497.98	620.023	1522.08
CCNG1	-1.01582	2.28358e-07	9889.48	4051.3	10046
IMMP2L	-1.01245	3.15398e-06	680.977	278.545	689.454
ARFGEF2	-1.01244	4.63248e-10	10941.8	4679.59	11077.9
GPR157	-1.01106	0.000623593	169.045	77.1364	170.915
CLCN3	-1.00739	1.38098e-07	9893.55	4358.3	9966.65
CLASP2	-1.00734	1.58238e-08	7243.57	3178.48	7296.71
HADH	-1.00489	1.96723e-11	3825.75	1599.64	3844.48
CHKA	-1.0042	5.68171e-08	3050.09	1233.77	3062.91
MSI2	-1.00391	3.11708e-08	2336.61	1017.07	2345.75
MAP3K9	-1.00357	0.00239718	246.068	102.091	246.947
SLC25A23	-1.00246	6.86011e-07	8609.09	3284.23	8630.26
APOE	-1.00174	0.0093617	117860	39880.2	118066
PCDH7	-1.00109	0.00833228	8855.61	4050.75	8865.27
DMD	1.00028	0.00602928	1226.61	2098.64	1226.96
TNFRSF1B	1.00061	0.000271911	2798.75	4365.84	2800.47
SACS	1.00147	8.18264e-06	3261.09	5704.48	3265.88
GIMAP8	1.00193	0.000521885	609.273	985.023	610.451
GPR132	1.00249	0.00172364	226.955	361.364	227.52
HK3	1.00275	0.00290134	335.705	554.659	336.628
SYP	1.00293	0.0016363	226.909	382.909	227.574
DLL4	1.00329	1.01676e-06	481.318	833.727	482.901
PLOD2	1.00566	5.85796e-05	2408	4357.18	2421.62
SLC1A3	1.00585	0.000558512	800.955	1344.64	805.644
CXCR4	1.00632	0.000889408	2532.84	4070.98	2548.85
CLIC2	1.00632	0.00254622	440.909	726.045	443.697
GIMAP5	1.00663	0.00282462	1058.95	1658.91	1065.97
INMT	1.00746	0.00665155	150.091	229.295	151.211
KIAA1462	1.00827	4.56659e-05	794.25	1346.02	800.817
CFD	1.00931	0.00913993	388.136	506.545	391.75
PVRIG	1.01094	0.00318241	216	319	218.363
COL8A2	1.01244	0.00359481	612.727	962.886	620.347
RGL4	1.01268	0.00747017	28.1818	43.3636	28.539
C10orf54	1.01458	0.0001738	1597.3	2626.43	1620.59
MAP4K1	1.01508	0.00449108	648.159	960.682	657.934
SPINT2	1.01596	0.000519581	448.614	727	455.772
ODC1	1.01722	0.00015683	5048.43	8873.07	5135.38
SCNN1D	1.01729	0.00053188	103.136	181.659	104.92
SLFN11	1.01896	0.000925335	1343.61	2350.43	1369.09
SDS	1.01898	0.00620597	321.932	485.432	328.043
SRGN	1.01907	0.000240631	3813.57	6375.14	3886.28
PNP	1.02008	1.68013e-05	1598.18	2798.45	1630.28
VAMP5	1.02059	2.43734e-05	2108.59	3358.55	2152.02
EVI2B	1.02066	0.00162272	1080.5	1682.11	1102.83
CYSLTR1	1.02105	0.00280888	51.5909	82.9091	52.6767
SEMA3F	1.02176	5.70743e-06	712.364	1250.36	727.867
TCTEX1D2	1.02343	1.24328e-07	127.705	226.136	130.696
ATP8B4	1.02392	0.00039274	116.409	194.364	119.194
PCDHGA5	1.02494	0.00137133	46.2727	85.9091	47.4269
TUSC3	1.02574	0.00277886	2723.27	4975.32	2793.38
ITGAM	1.02609	0.000233763	714.5	1176.93	733.143
ACE	1.02618	3.18835e-05	764.318	1238.91	784.327
ENPEP	1.02642	0.00017413	213.727	379.614	219.374
KLF5	1.02648	0.00617666	514.318	939.909	527.937
ROBO3	1.02688	3.12942e-05	359.773	594.932	369.442
PALMD	1.02701	0.00669228	379.295	640.045	389.54
BICC1	1.02715	0.00290134	176.273	322.273	181.058
CEBPA	1.02757	0.00214586	618.455	890.364	635.506
BAIAP3	1.02758	0.00962008	129.614	210.273	133.188
STAC3	1.02788	0.000336266	145.091	231.205	149.136
HS3ST1	1.02799	0.00120897	234.977	413.795	241.554
ZNF177	1.02892	0.000164838	115.614	199.477	118.957
CST3	1.02936	1.3332e-06	17019.9	26869.2	17519.6
GNG2	1.03028	0.000183253	5808.57	10090.1	5984.45
SATB1	1.03208	0.00288345	1751.36	3142.41	1807.55
VWA5A	1.03299	0.000901739	615.955	1055.02	636.277
DERL3	1.03321	0.00634352	537.091	733.114	554.93
LCAT	1.03451	1.94915e-07	165.341	302.091	171.047
MT1F	1.03484	0.00565549	312.545	594.068	323.433
P4HA2	1.03564	8.83678e-05	3685.84	6683.68	3817.21
PRR5L	1.0365	2.28547e-05	292.705	477.818	303.387
GPX7	1.03708	0.000775531	897.864	1552.43	931.156
HVCN1	1.03729	0.000838073	500.909	776.545	519.586
SLC8A1	1.03745	0.00092015	415.773	710.477	431.342
FBLN1	1.03781	0.00439184	4863.98	7675.52	5047.9
IL18	1.03803	0.00392758	269.636	432.068	279.891
POPDC2	1.03863	1.46284e-05	109.841	188.591	114.084
CD180	1.0394	0.00439184	346.182	501.182	359.821
HOXB3	1.03993	0.000388486	401.114	700.591	417.128
GADD45B	1.04002	9.83596e-06	884.705	1486.43	920.109
NBEA	1.04151	0.00200143	932.591	1694	971.3
SGCE	1.04315	0.000173945	2353.3	4173.66	2454.85
ARHGAP30	1.04499	0.00238097	1746.95	2866.14	1825.55
GCNT1	1.04517	0.000293539	441.227	761.159	461.159
OLFML1	1.04523	0.00131605	298.182	468.682	311.668
RIN1	1.04537	5.07967e-06	932.75	1673.27	975.073
TAGLN	1.04638	0.000236503	3770.75	5943.52	3945.65
PPP1R13L	1.0468	4.95858e-05	306.5	542.932	320.844
PEAR1	1.04743	0.00825288	356.5	618.386	373.411
MYO1F	1.04762	0.000546532	1214.68	1950.32	1272.52
MYO1G	1.04774	0.00360632	605.932	956.182	634.859
PTCH2	1.04919	0.000628419	44.8182	75.2955	47.0226
NOTCH1	1.05067	9.76227e-07	4777.36	8455.64	5019.41
B3GNT9	1.05087	3.60934e-05	645.886	1140.73	678.743
CA13	1.05136	0.0010143	117.5	205.841	123.535
SFXN5	1.05154	1.38896e-10	700.136	1259.43	736.219
SGMS1	1.05224	3.54422e-06	518.432	919.705	545.517
BIN2	1.05255	0.00299654	496.341	773.045	522.421
IL10RA	1.05453	0.00261646	1698.93	2773.27	1791.57
SNX20	1.05541	0.00803606	177.205	283.795	187.023
ITGB2	1.05544	0.00187058	6090.73	9733.52	6428.38
S1PR2	1.05546	1.453e-08	1944.7	3410.95	2052.56
VAV1	1.05897	0.00441424	586.682	909.045	621.28
COTL1	1.06024	1.33319e-07	14366.1	24864.5	15231.6
GAB3	1.06038	0.000148183	214.432	371.523	227.379
C16orf54	1.06115	0.008083	238.773	371.068	253.373
MMP19	1.06298	5.8517e-10	740.773	1259.05	787.427
MMP11	1.06301	0.00357467	1821.27	2848.66	1936.03
P2RY8	1.0636	0.00335384	508.136	779.432	540.454
KCNA3	1.06476	0.00692	74.9091	117.955	79.7598
CXorf21	1.0648	0.001316	81.4545	137.477	86.7331
ZGLP1	1.07175	7.46072e-08	41.25	72.7045	44.2098
TMEM87B	1.07234	6.05022e-08	2058.14	3736.84	2207.02
FLT3LG	1.07301	0.000293329	232.068	377.409	249.011
PRDM1	1.07306	0.000646678	740.727	1392.89	794.844
FGR	1.07367	0.0012313	416.614	657.045	447.307
ASCL2	1.07382	0.00547835	45.5909	71.75	48.9562
WBSCR27	1.07541	0.00206166	97.7273	172.364	105.097
NEXN	1.0755	0.000145671	162.795	292.341	175.087
KLHL23	1.07568	0.00148155	156.977	288.136	168.857
ID4	1.07604	0.0029211	1141.52	2062.64	1228.32
SERPINH1	1.07758	5.39413e-08	17486.7	31244.7	18843.4
DUSP1	1.07823	0.00061397	3197.86	6380.66	3448.03
GNGT2	1.0783	0.00131825	56.5455	89.75	60.973
FOXD2	1.0787	0.000179185	303.341	532.341	327.215
KCNQ1	1.07871	3.05921e-05	212.909	355.045	229.667
ACP6	1.07911	5.00187e-05	1274.95	2374.91	1375.82
TTC39C	1.07996	9.39501e-05	828.5	1513.89	894.75
AMICA1	1.08006	0.00227597	464.409	739.023	501.588
EGR2	1.08013	0.000244847	854.182	1683.45	922.624
IRAK3	1.08017	0.00162495	497.386	875.955	537.26
GADD45A	1.08032	1.11171e-05	1548.75	3076.02	1673.15
HLA-DMA	1.08058	0.000788933	3918.64	6240.55	4234.41
LETM2	1.08086	3.10829e-05	125.318	231.727	135.452
AADAT	1.08198	0.000266937	298.795	559.136	323.291
OSBP2	1.08264	0.00847081	542.614	1058.93	587.455
COL18A1	1.08321	9.65258e-06	13862	25060.2	15015.4
F12	1.08411	0.00892996	226.75	400.205	245.821
ZMYND15	1.08439	0.000347255	110	179.364	119.282
CPZ	1.08478	0.00634352	164.409	268.705	178.348
IRF8	1.08552	0.00466779	949.273	1519.77	1030.45
GPR34	1.08694	0.00112377	249.909	442.864	271.635
DENND1C	1.08698	0.00277002	487.818	762.159	530.249
PDGFB	1.0879	6.48216e-06	731.75	1333.77	796.07
ARHGAP25	1.08808	0.00026431	811.864	1352.09	883.374
NFATC2	1.08835	0.00156336	608.045	1051.48	661.767
LILRB3	1.08847	0.000331669	260.136	419.727	283.152
ADAP1	1.08928	0.000652374	472.136	787.25	514.287
RFX2	1.09047	1.13224e-05	273.409	487.773	298.143
CYBB	1.09059	0.0019934	2995.84	5357.36	3267.24
FLI1	1.09093	6.13198e-05	757.614	1280.61	826.506
DOK2	1.09114	0.00102335	569.909	927.864	621.85
CSF2RB	1.09386	0.00181067	670.182	1122.36	733.083
PITPNM3	1.09386	0.00349728	88	174.432	96.2599
NPDC1	1.09594	0.000145853	1378.02	2243.91	1510.24
NOD2	1.09676	0.000623709	176.432	308	193.504
TSPAN18	1.09686	9.67229e-05	493.818	810.727	541.649
LYL1	1.097	1.30898e-05	279.295	453.727	306.388
MFAP2	1.09841	0.00589478	2246.43	4019.14	2467.51
RASSF5	1.09998	0.000395119	1067.57	1765.14	1174.3
P2RY13	1.1001	0.00448725	163.886	281.659	180.292
PCDHB8	1.1004	0.0084177	154.568	296.409	170.087
HLA-DRA	1.10084	0.0026879	34217.1	56486.3	37667.7
SPHK1	1.10207	0.00221631	1807.77	3668.43	1992.3
ROM1	1.1021	1.01976e-06	129.932	234.068	143.198
SLC25A37	1.10294	5.57325e-07	1342	2502.2	1480.14
CD53	1.10296	0.00117751	2189.41	3561.43	2414.84
SCARF1	1.10343	3.46061e-06	346.318	637.636	382.138
C5AR1	1.10398	0.000113262	529.864	993.295	584.961
ATP8B1	1.10399	0.000329569	304.75	589.205	336.44
CALCRL	1.10402	1.96579e-05	470.341	879.614	519.265
C5	1.10452	0.000448403	252.75	481.523	279.166
MFSD2B	1.10465	5.3498e-05	222.205	434.977	245.459
LMO7	1.10472	2.4473e-05	932.25	1707.64	1029.87
HLA-DOA	1.10503	0.00361937	2041.09	3510.18	2255.47
RASGRP4	1.10646	0.000226529	90.4773	155.5	100.109
ASPHD1	1.10678	0.00602928	466.068	860.182	515.836
FBLN7	1.10739	0.00187605	490.114	973.5	542.749
CYP2S1	1.10773	0.000398212	110.023	187.705	121.875
CAPN12	1.10849	1.31848e-07	165.045	285.318	182.951
IL3RA	1.1085	2.84879e-05	247.75	419.909	274.631
LBX2	1.10889	0.000121222	111.25	209.023	123.364
CTXN1	1.10927	0.00164156	414.955	727	460.297
CSRNP1	1.10979	1.5764e-09	1055.59	1981.52	1171.49
ICAM2	1.11044	5.86429e-05	424.886	690.614	471.81
WNT10A	1.11316	0.00536776	42.0455	70.5455	46.8034
KL	1.11482	1.62751e-05	36.4773	65.3864	40.6655
ITGA4	1.11542	0.00423588	2263.82	4089.45	2525.1
GIMAP1	1.11604	0.000512692	263.977	443.818	294.609
MLKL	1.1162	1.89716e-05	468.159	855.841	522.558
STK17B	1.11626	6.42043e-05	1583.45	2768.55	1767.55
NFAM1	1.11746	0.000458316	555.068	953.409	620.269
CD72	1.11813	0.00181464	370.5	594.023	414.267
ATHL1	1.11837	2.41809e-05	773.705	1312.2	865.287
CFH	1.11996	0.000359175	2299.66	3896.11	2575.53
PIK3CG	1.12031	0.00245203	248.977	433.591	278.932
CD163	1.12094	0.00131062	3231.52	5928.2	3622.33
IL4R	1.12119	3.33215e-06	1688.36	3048.18	1892.97
BCL6B	1.12124	1.93661e-06	324.295	604.932	363.614
SNRPB2	1.12164	1.88555e-09	3802.48	7162.61	4265
SEL1L3	1.1232	0.00314152	2985.3	5633.93	3353.09
DCHS1	1.12482	0.000248164	2827.27	5101.23	3180.16
CNIH3	1.12682	0.00759154	1780.07	3481.48	2005.82
PDE1B	1.12798	0.0001129	172.227	287.295	194.268
PTPN6	1.12814	0.0010193	1634.16	2601.48	1843.55
MYCT1	1.12818	1.90861e-05	173.682	318.614	195.945
FCGR1A	1.12864	0.00112155	363.432	630.545	410.182
C9orf89	1.1293	3.40185e-07	1060	1975.16	1197.05
RRN3P2	1.12969	0.00018937	33.9091	58	38.3067
MARCH1	1.12982	0.000317543	156.568	280.295	176.894
IFITM2	1.13054	8.33393e-06	6489.98	11786.4	7337.19
DAPK2	1.13232	9.71385e-05	123.273	220.227	139.584
TMEM121	1.13327	4.11233e-05	328.864	619.682	372.691
FLT4	1.13446	3.8714e-06	402.432	726.932	456.542
IQCG	1.1347	8.33393e-06	519.795	1014	589.814
RRAS	1.13494	4.00724e-07	1307.41	2442.75	1483.82
ANKRD34A	1.13507	1.4143e-06	203.114	391.705	230.548
BACH1	1.13673	1.11857e-08	3626.8	7168.41	4122.7
TECTA	1.13675	0.0016625	46.2955	92.1591	52.6263
SYNM	1.13711	0.0042095	7052.41	12287.3	8019.35
F10	1.13763	0.00489476	52.1136	67.8409	59.286
TYROBP	1.13912	0.000164083	2420.98	3897.25	2757.78
AMOTL1	1.13933	9.03582e-06	7046.75	13897.5	8028.6
SPARC	1.13938	4.39447e-08	108714	214375	123867
IL32	1.14046	0.0023086	2055.75	3451.73	2344.5
MFNG	1.14068	0.000205653	470.932	800.341	537.184
SSTR2	1.14072	5.23714e-05	45.9773	78.3182	52.4473
FGD5	1.14158	6.58081e-06	526.841	948.523	601.428
KLRB1	1.14171	0.00621648	60.5227	96.5455	69.0993
MRGPRF	1.14193	0.000508074	168.955	283.114	192.934
SLC43A2	1.14245	6.62485e-07	855.432	1537.16	977.284
ADAMTSL4	1.14325	4.398e-05	668.114	1233.7	763.82
LFNG	1.14403	9.5301e-06	418.182	738.477	478.412
CCDC109B	1.14423	1.34063e-05	437.25	787.795	500.315
SERPINF2	1.14483	0.000202707	101.614	175.955	116.33
DPEP2	1.14543	0.00129919	101.75	152.273	116.548
ZCCHC6	1.14722	8.38748e-08	1642.5	3255.34	1884.3
HLA-DRB6	1.14806	0.00500118	1076.09	1896.68	1235.41
C16orf52	1.14834	8.12695e-08	1156.93	2209.8	1328.55
CCDC150	1.14925	0.000139424	56.0682	104.114	64.4365
FUT8	1.14936	6.0801e-09	1909.75	3746.05	2195
CD248	1.14963	0.000308385	1890.91	3373.66	2173.85
CD6	1.14991	0.0065941	502.477	848.341	577.805
TRERF1	1.15136	0.000133313	550.136	1044.7	633.406
ME1	1.15155	0.00206028	392.25	765.136	451.696
WISP1	1.15171	0.000197469	220.705	429.841	254.187
NUCB2	1.15276	9.226e-07	2530.93	4668.98	2917.57
MST4	1.1528	0.00580998	346.432	624.045	399.368
PPP1R9A	1.15296	0.00333781	797.818	1518	919.854
SH2D3C	1.15623	4.48831e-06	590.727	1007.59	683.015
C2orf27A	1.15645	3.81336e-06	37.8636	69.9773	43.7873
LAIR1	1.15656	0.000165855	1246.64	2148.14	1441.81
SH3RF3	1.15695	0.000706508	619.023	1164.68	716.177
RHOF	1.15794	0.00183416	452.886	780.955	524.414
TNFRSF10C	1.15973	0.00413766	155.432	295.091	180.259
MAPK13	1.16075	3.80427e-05	260.341	474.386	302.191
CYP1B1	1.16279	0.000179985	719.727	1407.89	836.891
CERKL	1.16521	0.000973348	229.659	416.023	267.601
ARHGEF19	1.16568	2.85061e-07	391.227	752.455	456.046
PRKCA	1.16577	0.000107271	2792.43	5790.59	3255.34
CTHRC1	1.16753	0.000278852	4436.45	8723.5	5179.68
LTBP4	1.16782	5.41653e-08	3804.09	7269.5	4442.48
TBXAS1	1.16897	0.00031763	973.432	1708.75	1137.91
NHSL2	1.169	0.000167379	53.2273	104.682	62.2229
SCML2	1.16921	0.00247929	153	295.864	178.889
HSD11B1	1.17037	0.00332355	101.727	203.341	119.059
SIRPB2	1.17112	0.000281507	127.932	224.909	149.824
FCGR1B	1.17132	0.000431431	315.75	567.364	369.844
P4HTM	1.17178	0.000102762	548.841	1054.89	643.121
VSIG4	1.17179	0.000329881	1355.34	2498.73	1588.17
KCNMB3	1.17187	7.79791e-06	81.1364	151.864	95.0811
COL4A1	1.17201	4.95324e-07	16395.1	31512.6	19215.3
CALHM2	1.17295	1.77331e-08	936.568	1695.73	1098.55
COLQ	1.17309	0.000268982	103.432	169.727	121.334
TDO2	1.17352	0.000258341	88.6364	166.864	104.017
SP140	1.17864	0.00360718	309.523	515.932	364.815
GPR65	1.17957	0.000321073	186	341.523	219.399
P2RY14	1.18004	0.000178419	55.4773	102.568	65.4652
SMURF2	1.18063	3.35297e-08	1284.5	2701.64	1516.52
F2RL3	1.18122	0.000278609	56.8409	104.364	67.1419
HCST	1.18181	0.000525115	462.591	750.364	546.696
SLC31A2	1.18287	1.98875e-06	807.636	1716.11	955.327
CD48	1.18298	0.00358006	804.727	1333.41	951.978
TMEM37	1.18299	5.36672e-05	197.432	322.705	233.56
TRAF3IP3	1.18421	0.0032228	344.614	574	408.094
SGCB	1.18517	1.6361e-09	2371.32	4810	2810.43
CHST7	1.18587	1.03499e-05	145.523	291.705	172.571
VWA1	1.18688	5.71717e-05	3361.07	6842.77	3989.18
ULBP2	1.18715	0.0045573	82.9318	159.818	98.4521
FBLIM1	1.18721	3.95044e-05	1851.11	3686.52	2197.66
AIF1	1.18758	8.65562e-05	1053.7	1887.55	1251.36
PCDHB12	1.18922	0.000864728	112.591	213.25	133.896
SLC1A1	1.18969	0.00472608	328.773	613.932	391.137
CD74	1.1927	0.00119719	108166	182794	129009
NOTCH3	1.19316	4.64758e-06	4413.91	8346.23	5266.51
PLEKHO1	1.19382	8.48268e-08	2701.3	5028.11	3224.87
VCAM1	1.19483	0.00070195	1170.52	2059.93	1398.58
FBLN2	1.19548	0.00178095	2288.48	4286.09	2735.83
PCDH12	1.19617	3.80489e-07	533.705	1015.73	638.403
S1PR4	1.1974	0.00307799	160.341	271.909	191.993
PBX3	1.19771	5.20704e-08	782.114	1512.75	936.744
HLA-DRB1	1.19957	0.00155448	13456.7	23240	16142.3
B4GALT6	1.20027	0.000103333	1954.73	4004.48	2346.21
GBP2	1.20041	0.000307279	4796.66	8119.16	5757.94
HSPA6	1.20093	0.000107392	1514.3	2758	1818.56
STAMBPL1	1.20166	7.35333e-07	659.227	1264.7	792.17
GLIS2	1.20187	1.71951e-06	1075.61	1999.14	1292.74
ABI3	1.20254	4.60315e-05	546.159	953.023	656.777
ID2	1.20271	1.41461e-06	1393.34	2736.66	1675.78
LUM	1.20295	0.000287616	5186.91	9964.25	6239.57
CD3E	1.20327	0.00898739	1209.05	1974.23	1454.8
SEMA4B	1.20385	3.97264e-07	2590.82	5280.86	3118.94
PRND	1.20457	0.00643257	62.2045	109.273	74.9296
SOCS1	1.2055	0.000611666	167.159	300.682	201.51
FLT1	1.20654	7.84892e-09	1717.27	3487.64	2071.96
HLA-DPB1	1.20809	0.00057118	10229.2	17679.8	12357.8
P2RX1	1.20834	0.0028286	52.8636	85.3636	63.8775
PABPC4L	1.20888	0.00316689	62.6364	115.205	75.7199
B3GNT7	1.21079	0.00206579	1378.32	2759.84	1668.85
IL2RG	1.2108	0.00349551	1593.59	2641.84	1929.52
KBTBD8	1.21249	0.000144692	133.455	239.068	161.813
PCDHGA7	1.21289	0.00366752	136.455	265.182	165.504
HBEGF	1.21311	1.72301e-06	1057.18	2245.5	1282.48
PTPN7	1.21324	0.00196855	719.227	1313.23	872.598
CMTM1	1.21325	2.15978e-07	308.795	631.068	374.646
TFEC	1.21451	0.000508074	255.977	484.659	310.887
ITM2A	1.21466	0.00326507	776.727	1203.48	943.462
F13A1	1.21566	0.0012581	1665.61	3335.3	2024.82
IDUA	1.21604	8.78475e-06	502.932	916.455	611.584
NAGS	1.21633	5.52321e-05	151.841	309.818	184.689
SLC35E4	1.21714	1.12099e-06	515.568	1087.45	627.521
SULF2	1.21751	0.000401972	4003.91	7840.8	4874.8
KCTD17	1.21857	6.86866e-06	637.955	1268.68	777.391
PCDHB7	1.21875	0.00210781	206.614	421.682	251.81
PALM2-AKAP2	1.21936	1.13604e-07	3327.66	6870.86	4057.6
ABCA9	1.2202	0.00335979	177.682	355.932	216.808
FAM3C	1.22117	3.94e-08	3852.73	7643.25	4704.82
IL21R	1.22217	0.00367365	337.477	600.023	412.454
OXTR	1.22225	0.00229112	87.2045	180.955	106.586
LYZ	1.22228	0.00175341	9044.95	16865.1	11055.5
KRT18	1.22371	0.00370683	1793.34	3650.89	2194.53
TOX	1.22373	0.00407362	287.523	534.045	351.85
TLE2	1.22505	0.00201804	443.136	834.455	542.866
ADAMTSL2	1.22541	0.00018427	197.932	347.114	242.548
ITPRIPL1	1.2271	0.000105733	252.864	513.75	310.289
MRO	1.2275	0.000382438	86.0682	172.114	105.649
CD33	1.22992	0.000204154	203.227	405	249.953
SH3BGRL3	1.23064	6.0801e-09	13605.8	25258.1	16743.8
SELPLG	1.2309	7.49599e-05	1299.73	2362.91	1599.84
ANXA1	1.23122	3.56856e-05	13231.3	27557.9	16290.7
TICAM2	1.23171	0.000279463	184.727	374.909	227.531
SIGLEC10	1.23181	0.00121838	442.318	809.091	544.851
TPPP3	1.23249	8.74122e-06	492.705	1010.52	607.251
GJA1	1.23263	0.000375222	1673.45	3275.66	2062.75
GPR35	1.2334	1.12136e-07	43.6136	79.0909	53.7931
WDFY4	1.23363	0.00283676	664.273	1134.11	819.466
KDELC2	1.23382	1.49541e-09	2649.7	5547.82	3269.26
ENO3	1.23414	0.000233123	212.023	466.386	261.665
NCF4	1.2342	1.86888e-05	445.773	810.455	550.174
PRKG1	1.2355	0.000808842	114.591	247.659	141.577
PSTPIP1	1.23617	0.00118744	246.114	448.841	304.237
ACOX2	1.23649	0.00645717	190.273	423.409	235.271
SH2B3	1.237	7.25996e-07	5507.91	11674.5	6813.27
PRNP	1.23719	7.2219e-07	14215	29132.2	17586.7
PCDHB6	1.23721	0.00796589	250.977	480.818	310.512
LIME1	1.23733	0.000329569	286.75	488.795	354.804
NCF1	1.23775	0.00206608	503.455	846.545	623.149
MRPS6	1.23792	2.85951e-06	2774.43	5511.14	3434.52
NLGN2	1.23803	3.80463e-08	1633.84	3232.77	2022.75
PLXDC2	1.23815	1.30281e-05	385.023	769.909	476.717
SLIT1	1.23842	0.00524206	60.9773	111.932	75.5154
SASH3	1.23925	0.000847734	1089.45	1874.98	1350.1
ACRC	1.23937	0.000909971	59.7955	102.909	74.1086
APLN	1.23969	1.53824e-05	210.455	444.318	260.899
REEP2	1.23985	0.000473535	419.955	808.955	520.679
GPR174	1.24012	0.00699642	44.9545	81	55.749
DDN	1.2403	0.000336172	48	106.705	59.5342
ZNF300	1.241	0.000191253	276.909	529.682	343.646
EPHB2	1.24135	7.01752e-05	395.5	770.659	490.956
HLA-DQA1	1.24143	0.00396724	5481.8	8879.57	6805.27
CREB5	1.24144	0.000996155	1354.3	2799.75	1681.28
INPP5D	1.24163	0.000161745	1298.61	2328.68	1612.4
CSF1	1.24295	2.16421e-06	1649.02	3373.75	2049.66
TREM2	1.24296	0.000148457	566.091	976.477	703.627
HOXA3	1.24318	0.00117827	292.795	589.977	363.997
PLD4	1.24381	0.00831166	188.205	335.523	234.091
LRRTM2	1.24388	0.00574273	122.636	260.205	152.545
FCGR1C	1.2439	0.000137528	97.3636	187.114	121.11
KYNU	1.24396	0.0068592	540.182	1034.77	671.965
SLC26A7	1.24428	0.00537381	30.5	59.3409	37.9506
BASP1	1.24447	0.000127836	903.591	1761.93	1124.49
FRMD3	1.24494	0.000550742	146.182	322.364	181.987
HPGDS	1.24533	0.00177233	43.5682	90.3636	54.2568
ZC4H2	1.24625	0.00106539	171.523	312.341	213.76
AGER	1.24648	6.53925e-07	91.1136	178.523	113.571
MAN1A1	1.24723	2.04971e-05	722.591	1457.45	901.236
BMP8A	1.24772	8.18791e-07	399.341	842.614	498.267
KCNE1	1.24791	0.00516156	78.4091	139.682	97.8473
NUAK1	1.24832	4.35397e-06	400.091	803.25	499.442
SLC26A4	1.2486	0.0054313	255.886	535.864	319.499
CYTH4	1.24888	2.63566e-05	928.932	1720.75	1160.12
EFEMP2	1.24946	6.37427e-06	2357.86	4775	2946.05
SYT7	1.24957	0.00250864	201.955	429.023	252.356
EMB	1.25032	0.000978916	1034.48	2009.93	1293.43
PRSS53	1.2512	1.19957e-08	82.7727	176.818	103.565
DAPP1	1.25212	0.00121117	161.273	298.023	201.933
CD300C	1.25246	5.49095e-05	94.0227	181.705	117.76
GGT5	1.25354	3.46602e-06	853.773	1593.11	1070.24
FAM107B	1.25492	3.06259e-06	1492.52	2759.23	1873
SV2A	1.25542	0.00132929	1214.86	2493.11	1525.16
GIMAP7	1.25614	0.000390352	448.909	832.455	563.895
ZFP37	1.25698	2.7727e-05	134.523	273.568	169.092
ZNF385A	1.25728	2.50087e-07	1676.27	3028.64	2107.55
OLFML2A	1.25779	5.43088e-05	1458.48	3049.23	1834.46
STARD13	1.25793	3.88746e-06	1705.45	3597.18	2145.35
TC2N	1.25801	0.00309156	442.273	942	556.384
ELK3	1.25938	7.64157e-10	1623.05	3479.93	2044.03
EN1	1.25974	0.00276833	111.273	200.659	140.174
ZNF117	1.26	6.21991e-06	587.364	1101.55	740.081
KCTD12	1.2602	1.56228e-08	4654.73	9634.25	5865.9
CORO1A	1.26034	0.000757679	3594.05	6332.68	4529.73
NET1	1.26051	1.03499e-05	1987.66	4310.14	2505.47
MXRA5	1.26064	0.000836167	2774.84	5331.3	3498.07
TUBA4A	1.26145	0.000136699	492.659	899.273	621.465
SIT1	1.26145	0.00733176	202.045	344.864	254.871
SAMD3	1.26266	0.00371271	62.5227	119.955	78.9448
TMEM88	1.26315	2.08053e-05	105.636	208.659	133.434
CNN2	1.26349	2.35599e-08	5238.14	10049.4	6618.35
HSD11B2	1.26395	0.000223662	64.0682	123.364	80.9792
FAM134B	1.26557	0.000796464	942.955	2040.82	1193.37
FOXD3	1.26567	0.000212895	936.136	1982.93	1184.84
POTEF	1.26575	0.00014287	38.1136	76.2727	48.2422
ZCCHC24	1.26606	3.65854e-08	5912.18	12295.8	7485.19
TLE4	1.26759	0.000939099	995.614	2078.16	1262.03
PTGIR	1.26891	3.19877e-07	66.9318	127.159	84.9305
FJX1	1.26911	8.43618e-07	455.727	976.364	578.369
RPGR	1.26998	1.20796e-08	627.977	1319.39	797.519
ABHD2	1.27024	2.49683e-06	14117	31641.8	17932.1
PPM1J	1.27032	4.68023e-06	84.2045	179.864	106.967
CSPG4	1.27104	0.00357161	53465.4	107218	67956.5
SLCO4A1	1.27112	0.000802482	614.068	1312.23	780.556
VGLL3	1.27133	0.00112665	316.409	653.864	402.26
IER3	1.27163	0.000239701	5477.77	11751.5	6965.69
ECM2	1.27213	6.6429e-05	165.795	324.636	210.913
COL4A2	1.2723	3.31969e-07	22095.3	44063.6	28111.9
FNDC1	1.27233	0.0019096	601.045	1189.32	764.725
DGKI	1.27358	0.00599237	177.068	351.023	225.511
CCL14	1.27368	0.00751725	220.182	364.568	280.44
ARHGAP9	1.27455	0.000390501	533.432	965.773	679.885
ZNF831	1.2776	0.00300589	140.705	258.864	179.764
PRICKLE1	1.2781	0.000115891	580.591	1198.2	742.055
HSH2D	1.27814	0.00429976	154.591	268.977	197.59
DDO	1.27874	0.00189539	73.4545	161.636	93.9296
TIMP3	1.27877	2.90678e-05	47522.9	102133	60770.7
HCLS1	1.28	9.85096e-05	2091.02	3903.3	2676.52
OLFML2B	1.28002	4.51972e-06	2013.68	3983.07	2577.54
ADM2	1.28151	0.000190986	317.955	633.341	407.463
IL2RA	1.28235	0.000645409	180.273	359.114	231.173
TNFSF12-TNFSF13	1.28251	0.00200738	334.364	588.136	428.826
DGAT2	1.28407	7.76206e-06	416.864	870.727	535.281
C12orf68	1.2843	0.00154216	95.2955	188.682	122.388
TSPAN32	1.28463	0.000749695	44.5909	87.9318	57.2828
LST1	1.28612	2.62864e-05	313.614	586.477	403.345
AHR	1.2865	8.18658e-07	5959.84	12903.8	7667.35
CAMK1D	1.2872	0.000150229	69.9773	141.795	90.0748
EMID1	1.28766	0.00415495	230.977	478.523	297.419
EHD3	1.28785	0.000195919	1496.64	3079.27	1927.44
CD300A	1.28848	6.82211e-07	436.545	867.159	562.48
VWCE	1.29043	0.00122938	47.8182	98.3182	61.7062
JAK3	1.29068	8.05075e-06	1200.91	2338.34	1549.98
GPR4	1.29078	5.63016e-11	269.386	554.091	347.72
COL16A1	1.29148	4.04652e-06	3195.43	6630.57	4126.85
LMO4	1.29212	5.68278e-08	3149.3	6508.48	4069.28
GJA5	1.2952	6.2713e-07	282.341	583.5	365.688
SYTL1	1.29665	0.00114946	191.045	359.25	247.719
SPI1	1.29691	1.73528e-05	1324.27	2431.27	1717.46
TSPAN2	1.29694	0.000121936	38.6818	77	50.168
CST7	1.29698	0.0012313	518.568	896.591	672.574
FAM171A2	1.29847	0.000521601	212.227	427.636	275.571
SEMA4D	1.29955	3.30298e-06	1379.14	2734.3	1792.26
CTSW	1.30018	0.00263707	443.659	787.341	576.835
HLA-DQA2	1.3007	0.00309156	1101.48	2259.59	1432.69
ST14	1.30184	6.68396e-05	432.182	843.659	562.631
MFSD2A	1.30253	7.72211e-06	417.682	889.841	544.041
UNC80	1.30309	0.00675747	182.295	394.023	237.548
DCBLD1	1.30347	6.96364e-07	471.75	1067.39	614.911
FMO1	1.30482	0.00551404	166.659	309.477	217.46
SIX1	1.30581	8.1677e-05	239.909	507.932	313.276
TNFAIP8	1.30664	2.30772e-06	506.955	968.114	662.407
BCL3	1.30774	3.94015e-09	1234.7	2525.75	1614.67
DOCK3	1.30823	0.00583536	69.3182	143.795	90.6844
ALCAM	1.30973	6.9151e-05	1970.02	4311.14	2580.2
BLNK	1.30989	0.00154657	181	326.364	237.09
TGM2	1.31012	2.56942e-05	5262.86	11819.2	6894.97
EXOC3L2	1.3117	2.10171e-07	184.5	363.795	242.009
PTPRN2	1.31341	0.000470513	184.5	363.545	242.325
DSE	1.31438	1.80029e-11	899.091	1908.09	1181.75
LDB2	1.31497	8.28901e-05	440.864	931.364	579.722
RASGRF2	1.31618	2.01585e-06	86	181.727	113.191
PAQR6	1.31735	0.000175372	121.386	259.75	159.909
STARD4	1.31778	0.000188918	249.977	549.455	329.416
C1orf162	1.318	1.70153e-05	478.909	864.477	631.204
PARVG	1.31933	3.80392e-05	602.341	1101.84	794.684
PCDHGA6	1.32066	0.00223923	173.386	373.091	228.985
SYT11	1.32126	2.71391e-06	2809.3	6216.82	3711.81
HOXB2	1.32149	0.000179933	569.773	1271.36	752.946
JPH1	1.32229	0.00769011	325.659	789.432	430.616
IL1R2	1.32385	0.00102815	45.6136	92.7045	60.3857
WAS	1.32436	5.82596e-05	674.523	1260.61	893.308
GPR55	1.32506	0.000507744	84.4773	184.523	111.938
CD14	1.32646	3.52311e-06	4429.3	9034.3	5875.27
NRCAM	1.32733	0.00645615	1115.84	2120.18	1481.09
GATA3	1.32883	0.001933	145.75	273.591	193.677
DNALI1	1.32979	0.00589989	334.5	770.955	444.816
TRIM46	1.33211	3.66825e-06	159.591	335.636	212.593
CX3CR1	1.33331	0.00253247	147.568	322.432	196.754
WSCD1	1.33358	0.00307194	172.795	360.386	230.436
LAPTM5	1.33543	5.23717e-06	9341.5	18278.7	12474.9
LSP1	1.33556	3.86426e-05	2864	5015.61	3825.06
FAM110B	1.3363	0.000113721	233.227	531.568	311.662
CHST6	1.33687	0.000341665	1589.7	3821.11	2125.23
DPF3	1.33887	0.000272575	71.3182	159.977	95.4855
NTNG2	1.33973	0.00133016	69.7273	145.636	93.4158
P2RX5	1.33983	0.000133266	198.977	368.114	266.596
CARD11	1.34068	0.00158653	402.318	737.545	539.381
SEPT1	1.34107	0.000705303	461.068	830.659	618.323
AURKC	1.34377	5.42886e-05	24.4545	45.7727	32.8613
EFNA5	1.34407	0.000410146	780.75	1685.59	1049.38
TRPC6	1.3472	3.58814e-05	75.7955	160.818	102.111
STEAP4	1.34725	0.000137084	495.864	918.159	668.054
SLC6A6	1.34766	7.81234e-09	2110.41	4937.75	2844.11
PRICKLE2	1.34876	1.13779e-06	1453.25	3308.05	1960.09
NKX3-2	1.35101	4.72663e-05	39.5227	83.4091	53.3956
PCDHB14	1.35277	2.13444e-05	214.295	454.727	289.892
PLBD1	1.35497	0.000595523	1005.95	2026.11	1363.04
SVEP1	1.35569	0.00022678	435	819.591	589.724
PRR16	1.3575	1.07232e-05	76.5	167.023	103.849
CEND1	1.35762	0.00308379	43.8409	104.5	59.5193
LCTL	1.36036	0.00361937	98.4318	215.727	133.902
ITGA6	1.36087	2.44221e-06	7428.66	16983.5	10109.4
BIN1	1.36093	2.80825e-07	1854.02	3886.3	2523.19
MIAT	1.36107	7.68712e-05	267.045	559.205	363.467
RCSD1	1.36136	8.08667e-05	823.886	1660.68	1121.6
LAMA3	1.36257	0.000507904	217.318	446.545	296.112
CCR7	1.363	0.00601116	332.591	642.955	453.322
NLRP3	1.36332	7.5192e-06	208.682	478.386	284.501
CLIP3	1.36375	3.71841e-08	1769.68	3711.16	2413.4
CD96	1.36391	0.00151661	417.795	801.818	569.836
PLEKHN1	1.36659	0.00100841	57.7045	131.568	78.8585
SIX4	1.36693	4.93712e-05	142.114	320.023	194.259
PRAM1	1.36774	0.000126242	86.3409	161.682	118.092
GSDMB	1.36785	1.45085e-06	55.5227	117.409	75.9469
LARP6	1.36811	1.18711e-05	621.023	1378.66	849.625
MAGI1	1.36915	3.15331e-06	244.273	523.909	334.445
LOXL1	1.36952	7.19203e-06	618.886	1236.64	847.575
SELL	1.37089	0.00140612	1009	1899	1383.23
GPR68	1.37101	4.13716e-05	229.045	498.682	314.023
CACNA1C	1.372	0.00169353	276.386	510.068	379.202
CD52	1.3732	0.00139808	922.364	1643.55	1266.59
NDUFA4L2	1.37383	3.41692e-05	671.295	1397.14	922.249
LEPREL2	1.37489	1.37746e-05	1193.2	2657.14	1640.52
RGS18	1.37558	8.36932e-05	58.7727	123.409	80.8468
EFCAB4A	1.37564	7.84513e-06	72.9545	159.795	100.359
PSD	1.37752	0.000118448	216.614	482.727	298.39
CCDC74A	1.38055	1.87627e-06	135.841	304.841	187.535
FCGR2A	1.38123	6.06236e-09	3638.07	7806.09	5024.99
GP1BA	1.38273	0.00243859	127.227	233.523	175.921
DCN	1.38373	0.000243345	5026.86	10722.7	6955.83
STK32B	1.38502	1.215e-05	942.705	2084.8	1305.66
LRCH2	1.38545	0.00204068	212.977	464.659	295.07
EML1	1.3857	0.000115591	436.955	985.568	605.486
HLA-DRB5	1.38575	0.00114934	4349.43	8705.55	6027.21
SDC2	1.38662	0.000207005	3228.66	6732.07	4476.92
ZNF682	1.38679	2.86653e-05	43.6136	92.8636	60.483
VNN1	1.3883	0.000221101	69.9545	159.205	97.1179
ADAMDEC1	1.38832	0.00666561	367.318	746.341	509.954
JAM3	1.39191	1.2736e-05	2873.82	6467.89	4000.08
GPR173	1.39291	0.00215586	67.3409	138.568	93.7996
FGF1	1.39291	0.000774402	479.568	1087.95	667.995
BGN	1.39307	1.84134e-06	14564.2	30119.8	20289
TRIM9	1.39346	9.53342e-05	1283.48	3123.48	1788.48
RARRES2	1.39457	0.000134763	1030.05	1921.86	1436.47
FGFR1	1.39474	5.51635e-06	5868.3	13334.3	8184.75
METTL7B	1.39501	0.000498912	342.818	774.818	478.235
GUCY1A3	1.39529	1.93693e-07	462.318	1041.18	645.067
DENND3	1.39605	4.22807e-11	679.682	1465	948.87
ACPL2	1.39614	6.79153e-11	786.477	1834.5	1098.03
IL15RA	1.3964	5.58649e-06	263.909	567.841	368.523
TBX1	1.39652	0.0097417	41.1818	82.0227	57.5111
ADORA2A	1.39677	8.93358e-06	304.477	657.068	425.285
RASAL3	1.39794	0.000271911	492.227	961.727	688.102
GPR84	1.40049	7.34994e-05	91.1818	194.159	127.699
CDH24	1.40152	5.33673e-07	309.591	685.341	433.897
GCOM1	1.40168	0.000383059	45.5455	93.0682	63.8401
MMP25	1.40332	1.45407e-05	118.977	248.864	166.963
IGFBP4	1.40496	2.67043e-09	10049	21763.4	14118.4
HOXB5	1.4058	9.06483e-05	102.523	232.159	144.126
SYN1	1.40581	3.14842e-08	50.2727	107.5	70.6738
SERINC2	1.40634	6.22437e-05	1897.18	4424	2668.08
MDK	1.40668	7.61533e-05	5100.61	11850.5	7174.92
CSF3R	1.4068	7.35482e-06	399.886	795.477	562.56
FUT7	1.40687	0.000768547	40.6136	81.4318	57.1383
MGP	1.40756	0.00473637	10598.5	24562.9	14918
ATP2B1	1.40822	2.34036e-11	3469.18	8015.77	4885.38
ASNS	1.40844	1.19163e-05	1249.14	2815.39	1759.33
TSHZ3	1.40919	5.71331e-06	580.682	1355.3	818.29
SECTM1	1.40963	3.48267e-05	719.227	1509.61	1013.84
CLEC4E	1.41091	0.00104376	74.5455	160.136	105.177
TMEM119	1.41095	0.00017888	919.75	1582.98	1297.72
THBS1	1.41109	5.94469e-07	5538.07	13514.2	7814.69
HOXB6	1.41116	1.43425e-05	217.068	500.091	306.318
CLSTN3	1.41274	6.62485e-07	1980.36	4392.64	2797.74
PROX1	1.41294	0.000617388	88.5227	202.682	125.077
NUDT16P1	1.41298	0.000554561	44.7727	103.341	63.2628
MEI1	1.41422	0.000148041	114.773	242.864	162.313
TNFRSF18	1.41438	7.98483e-05	64.3864	135.75	91.0668
ARL11	1.4149	2.04633e-06	83.7045	177.114	118.434
FAT4	1.41491	4.62228e-05	270.455	580.864	382.669
COL15A1	1.41494	1.58854e-06	4650.73	10696.6	6580.49
SERPINE2	1.41499	3.83238e-05	106607	245265	150848
C3orf67	1.41557	1.46634e-05	330.273	799.091	467.524
EFNB1	1.41599	2.21628e-11	1174.07	2627.91	1662.47
HTRA3	1.41647	0.000544372	870.023	1734.43	1232.36
GREM1	1.4165	0.00209864	297.636	690.477	421.603
MN1	1.41754	7.77352e-06	126.455	275.977	179.255
PITPNC1	1.41769	6.32753e-11	772.477	1844.98	1095.13
BCL11A	1.41968	0.00360718	144.659	277.455	205.37
C17orf72	1.41975	2.64878e-07	33.3636	74.0682	47.3682
LY86	1.42177	2.032e-05	281.795	544.114	400.647
FGF7	1.42232	4.61448e-06	196.886	448.773	280.035
ELN	1.42274	0.00360128	831.295	1563.93	1182.71
HTRA1	1.42312	5.56072e-05	3713.09	8510.64	5284.16
ACHE	1.42351	2.76507e-05	92.9318	186.227	132.289
PID1	1.42466	0.000383718	74.25	161.295	105.781
TNFAIP8L2	1.42518	3.88746e-06	193.091	393.773	275.19
GALNT6	1.42603	0.000709677	596.727	1492.66	850.953
COL3A1	1.4263	5.75548e-05	51156.3	109882	72964.1
FPR1	1.42661	5.08277e-06	271.045	633.182	386.675
APBB1IP	1.4269	2.80824e-05	682.523	1432.48	973.889
MYOF	1.42712	7.97468e-07	3248.77	7756.5	4636.4
NCF1B	1.42737	0.000188167	93.5455	189	133.524
PDCD1LG2	1.42853	0.00028416	209.636	505.205	299.472
SLC17A9	1.42935	0.00223731	689.227	1651.64	985.144
NCF1C	1.42961	0.000560404	160.568	309.977	229.549
DAGLA	1.42997	0.000105933	1400.84	3240.3	2003.16
TMTC2	1.43209	6.0981e-06	1078.25	2600.2	1544.15
RASA4	1.43214	4.97488e-09	481.114	1041.64	689.023
MEF2B	1.43228	0.000127712	95.1818	177.818	136.327
SLC26A2	1.43267	9.76092e-06	6340.89	14969.4	9084.42
PODN	1.4339	0.000498912	701.886	1290.59	1006.44
MIA	1.43439	0.00112774	9114.05	18987.4	13073.1
CCDC102B	1.43656	1.15874e-08	187.182	398.977	268.899
PSD4	1.43755	3.60866e-06	837.205	1737.93	1203.53
KCNK13	1.43828	1.66692e-05	50.8636	121.432	73.1562
CSF1R	1.43874	3.88746e-06	3046.86	6722.25	4383.64
CRISPLD2	1.44008	6.93738e-08	1139.82	2564.32	1641.43
KCNMB1	1.44042	2.38251e-07	66.5	147.659	95.7876
MEIS3	1.4421	0.000357487	478.432	972.636	689.945
SERPINB8	1.44344	5.15718e-09	990.636	2380	1429.93
ITIH4	1.4439	1.52681e-05	38.4545	83.6136	55.5245
RCOR2	1.44702	0.00116482	271.182	612.523	392.407
CARD9	1.4497	1.05871e-06	108.364	236.136	157.095
ALOX5	1.45023	5.38025e-06	504.295	1079.25	731.344
TERT	1.45078	0.000347255	40.5	98.9773	58.7564
EVI2A	1.45244	3.13557e-07	608.25	1369.43	883.444
ZNF883	1.45275	0.000757817	123.591	272.955	179.546
TLR9	1.4534	0.000103644	88.5909	176.273	128.758
ALOX15B	1.45371	0.00188132	81.7955	155.932	118.907
TMEM176B	1.45677	3.38335e-06	2223.07	4813.2	3238.49
CDYL2	1.45932	0.00023215	88.7045	205.409	129.448
DDAH1	1.46124	1.58488e-06	564.909	1344.84	825.469
COL10A1	1.46155	0.00242536	263.75	644.75	385.484
GPR183	1.46285	2.78903e-05	322.455	755.841	471.703
PDIA4	1.46291	1.54491e-11	15330	35631.2	22426.3
SLC4A3	1.46352	2.81409e-05	583.045	1387.34	853.296
PRKAR2B	1.4643	7.27696e-07	867.523	2025.41	1270.31
TMEM176A	1.46445	4.99285e-06	1046.93	2183.2	1533.18
CD1E	1.46447	0.00205448	28.0455	65.0682	41.0717
IL15	1.46569	6.71773e-05	122.545	268.841	179.614
RHOH	1.46666	0.000771275	244.273	496.705	358.266
RARRES1	1.46686	1.93661e-06	435.409	1003.93	638.683
DZIP1	1.46694	0.000125291	678.591	1650.32	995.455
SLC11A1	1.46727	3.31897e-06	231.409	538.227	339.54
PTPRO	1.46941	1.58813e-06	134.341	301.955	197.402
INHBB	1.47	5.21968e-08	261.114	683.273	383.837
SEMA6C	1.47098	7.61404e-08	273.636	621.159	402.514
ACAP1	1.47159	0.000689371	437.818	890.659	644.288
POSTN	1.47208	0.000498912	13811.8	33166.7	20332.2
FAM13C	1.47377	6.37231e-05	82.2045	197.091	121.15
ZFHX4	1.47414	4.69197e-05	551.068	1291.41	812.354
VOPP1	1.47476	4.0516e-09	1320.52	2972.8	1947.45
LTBP2	1.47548	1.90857e-07	2464.98	5763.23	3637.02
KCNAB3	1.47592	0.000241719	36.9545	87.8636	54.5418
C3orf52	1.4791	9.9296e-06	211.068	482.5	312.19
SRPK3	1.47965	2.53961e-08	48.2727	118.5	71.4265
PDGFRB	1.48088	1.59293e-08	3957.48	8952.07	5860.55
RASL11B	1.48252	0.000111993	52.7273	118.841	78.1692
CLEC4A	1.48313	1.10046e-06	88.9091	197.682	131.863
HECW2	1.48401	4.68073e-11	200.523	490.341	297.578
SLC9A5	1.48485	1.92624e-07	87.5227	212.705	129.958
LRRC49	1.48581	2.35636e-07	147.568	329.818	219.259
PTPRCAP	1.48586	0.000720766	791.273	1563.48	1175.72
TBC1D10C	1.48762	0.000718463	347.205	705.795	516.507
SOCS2	1.48802	1.32658e-06	766.182	1842.11	1140.09
CD1D	1.48829	2.16442e-07	105.159	226.318	156.508
DACT3	1.48864	5.82596e-05	365.045	822.955	543.423
LILRA4	1.48992	0.00603922	48.1818	99.25	71.7872
TEK	1.4909	2.75349e-05	258.295	605.432	385.094
TMEM108	1.49198	0.00039976	282.114	695.523	420.907
ANGPTL2	1.49248	1.50851e-05	3024.39	7262.48	4513.82
PRRG4	1.49449	0.00025285	150.045	388.705	224.241
VASH1	1.49505	3.31584e-08	2328.75	5300.11	3481.61
APOD	1.49527	0.00408902	68403.2	160112	102281
TWIST1	1.49536	5.75116e-05	746.136	1795.84	1115.74
AFAP1	1.49647	2.07659e-10	3110.41	7869.89	4654.62
COL21A1	1.49709	0.000853621	40.2045	93.1364	60.1898
CD55	1.49812	7.08282e-06	5228.18	12734.5	7832.44
PPL	1.50034	0.00109226	708.75	1835.45	1063.36
CYR61	1.50048	5.34319e-06	2861.84	7430.34	4294.14
MAP1A	1.50103	2.77393e-07	1182.2	3061.05	1774.53
LTBP3	1.50165	6.82581e-11	7663.27	19335.4	11507.5
CLEC2B	1.50313	1.62106e-08	612.091	1401.07	920.05
FGL2	1.5056	0.000101364	1735.48	4237.8	2612.94
RAB31	1.50575	6.47962e-10	2180.93	5501.8	3283.94
GPR114	1.50581	0.000555548	107.932	224.477	162.525
FGFBP2	1.50646	0.00220354	299.318	673.477	450.91
CD300LB	1.50734	3.8707e-07	34.7727	76.0227	52.4142
SPOCK1	1.50739	0.000644062	1871.55	4618.32	2821.15
STAB1	1.50898	5.66698e-09	2462.89	5997.43	3716.45
HIVEP3	1.51096	1.22218e-12	1298	3232.14	1961.23
CA12	1.51116	0.00350177	909.795	2179.09	1374.85
CHRNA3	1.51196	0.00267132	40.0227	84.8182	60.5128
CA2	1.51197	1.43873e-07	183.977	453.705	278.168
CLDN5	1.51326	9.49371e-07	228.841	488.977	346.296
FZD2	1.51389	3.75008e-07	286.091	656.205	433.109
MAP1B	1.51389	5.02867e-06	4561.5	11888.7	6905.61
PTGER3	1.5156	2.59337e-05	66.5682	160.295	100.89
SAMD5	1.51624	0.000803807	430.75	944.659	653.121
SPRY4	1.5164	8.95562e-07	12765	32048.8	19356.9
AGPAT4	1.51706	5.42595e-06	291.795	698.955	442.672
SELM	1.5176	1.30898e-05	1298.34	3047.2	1970.36
SLC16A2	1.51838	7.11837e-07	405.977	995.545	616.427
NMUR1	1.51838	8.6109e-06	31	76.5227	47.0699
SLC17A7	1.52061	0.000770164	119.841	266.591	182.231
OSM	1.52077	1.77882e-05	89.3864	239.295	135.936
GAS2	1.52156	0.00170863	90.4091	194.318	137.563
GPR176	1.52224	4.86527e-09	330.159	810.955	502.581
CLEC5A	1.52278	2.04189e-05	86.5227	225.023	131.755
PHLDB2	1.52293	5.44684e-05	872.545	2106.11	1328.83
ZDHHC15	1.52396	0.00796076	47.1818	110.932	71.9033
NUDT11	1.52492	0.000862771	97.3864	241.75	148.507
IL10	1.52733	2.19874e-05	44.9091	111.25	68.5912
KAZALD1	1.52983	5.71889e-07	197.864	477.295	302.697
NPTXR	1.53124	0.00199806	1076.45	3064.45	1648.31
FZD7	1.53188	1.11847e-05	2216.95	5743.55	3396.11
PCNXL2	1.53227	5.75764e-08	456.227	1105.75	699.063
THBS2	1.53261	0.00250834	18037.6	49433.4	27644.6
ELOVL3	1.533	0.000278852	19.5682	48.8636	29.9979
MYLK	1.53409	9.79413e-07	2746.84	6883.07	4213.91
VMO1	1.53419	1.46677e-05	91.2273	203.591	139.96
RUNX2	1.53624	4.14448e-09	581.682	1469.48	893.606
SSC5D	1.53633	3.742e-08	476.477	1086.27	732.027
CYP26B1	1.53683	4.74929e-05	378.705	918.75	582.005
CRIM1	1.54032	3.11053e-10	1361.16	3469.89	2096.62
PTH1R	1.54183	5.18081e-05	31.6364	68.9318	48.7778
FBLN5	1.5436	6.80157e-05	1509.09	3968.82	2329.43
AMPD3	1.54387	1.47165e-08	370.341	873.977	571.757
TPM2	1.54611	3.8707e-07	2641.32	6522.11	4083.78
RBP5	1.54864	0.000214392	137.227	276.091	212.516
EBF1	1.54958	7.44939e-10	232.545	549.477	360.347
RAB3B	1.5508	0.00794308	40.8636	122.409	63.3715
ROBO4	1.55307	1.94039e-09	626.773	1564.43	973.423
SMTN	1.55326	1.41611e-13	2842.41	7393.95	4415
KRT80	1.55333	0.000579054	119.909	316.932	186.258
DLG3	1.55351	1.79206e-10	706.5	1737.09	1097.56
MFAP4	1.55405	0.000485487	795.545	1554.41	1236.31
GNA15	1.55543	2.03662e-08	260.591	624.409	405.331
CD40LG	1.55699	0.00266324	44.3409	92.7955	69.0385
SORCS1	1.55847	0.00101673	1596.8	4131.73	2488.56
KRT10	1.55874	7.17625e-05	1816.8	5729.82	2831.92
SLC35F2	1.5591	4.51443e-06	545.477	1350.48	850.456
ZYX	1.55946	8.77062e-15	10948.6	27489.3	17073.9
FOXS1	1.55998	7.7113e-08	77.9318	184.636	121.572
KIF21B	1.56099	4.15473e-06	619.75	1513.5	967.426
GAPT	1.56154	0.000112989	80.4545	170.614	125.633
TBX15	1.56254	4.23728e-07	151.432	349.773	236.618
PRTFDC1	1.56403	0.00116971	114.932	303.25	179.756
PCDHB11	1.56524	0.00023001	145.205	376.841	227.279
COL5A3	1.56545	3.20707e-05	2922.66	7732.36	4575.29
HOXA9	1.56657	3.96451e-05	27.7955	77.4545	43.5436
F3	1.56734	1.71977e-07	194.273	493.409	304.491
CD69	1.56805	0.000291403	149.205	351.773	233.961
ADAMTS7	1.56984	1.49059e-05	860.227	2089.41	1350.42
BEND6	1.56987	5.55745e-06	101.795	277.136	159.805
SRPX	1.57299	1.00606e-07	7577.43	19967.4	11919.2
PDE2A	1.57418	4.05516e-06	287.295	693.682	452.254
ELOVL4	1.57436	2.70893e-05	153.068	381.364	240.985
DOK5	1.5748	0.00186663	151.886	334.75	239.191
MEX3A	1.57564	7.93065e-05	1185.86	2958.2	1868.49
OSBPL6	1.5758	9.66609e-06	307.318	815.318	484.272
CACNA1A	1.57685	4.17269e-07	70.3409	151.205	110.917
TRPV4	1.57708	0.000116247	1338.36	3398.32	2110.7
ABLIM3	1.57755	4.79975e-07	1422.11	3895.98	2243.45
NDRG1	1.57869	5.75445e-06	17463.3	48661	27569.2
GRIP2	1.57959	0.00168091	31.5	83.2955	49.757
CDR2L	1.57962	6.53145e-10	670.341	1740.39	1058.89
NNMT	1.58118	6.84314e-06	2587.91	6779.36	4091.95
CDC42EP2	1.58145	1.57377e-10	315.591	811.023	499.092
FBN1	1.58372	2.70292e-06	4576.39	12088.9	7247.7
NLRP1	1.5841	1.49709e-07	392.318	940.273	621.47
PLXDC1	1.58466	3.80965e-09	432.023	1092.52	684.609
REEP1	1.58704	8.71647e-05	34.7955	89.5455	55.2218
BDNF	1.58759	0.00248617	116.909	343.591	185.603
REP15	1.58778	9.95391e-10	54.8182	142.091	87.0391
AQP9	1.58874	0.000109273	115.955	294.091	184.222
SLC9A3R2	1.59149	1.15365e-12	1505.57	3820.43	2396.1
NAPSB	1.59185	0.000398137	422.818	926.682	673.065
DOK1	1.59358	4.68465e-16	667.818	1650.23	1064.22
TLR2	1.59465	2.0707e-08	738.614	1810.48	1177.83
GPC2	1.59631	1.83296e-05	231.477	525.977	369.51
FSCN1	1.59738	7.01036e-07	9022.7	23448.8	14412.7
SLC12A8	1.59747	1.35887e-06	190.614	491.227	304.499
USP53	1.60366	7.26518e-07	2077.86	5540.55	3332.2
LTA	1.60372	0.000470874	47.1591	99.5909	75.6302
LRMP	1.60382	0.000149169	232.909	487.227	373.543
COL4A5	1.60404	0.00636139	432.682	1063.77	694.038
ABLIM2	1.60474	1.04711e-05	94.3409	252.386	151.392
AOX1	1.60641	0.000110445	215.841	584	346.729
SCHIP1	1.60906	1.67143e-06	604.705	1569.98	973.008
MECOM	1.60952	2.66273e-10	193.182	516	310.93
PCDHB2	1.60968	0.000241892	317.795	819.091	511.548
COL4A4	1.61015	3.6927e-05	98.2045	211.205	158.124
CENPV	1.61121	0.00057888	149.545	371.409	240.95
RGS9	1.61157	0.000338893	50.5455	112.636	81.4577
KITLG	1.61231	1.66524e-11	256.659	688.818	413.815
C19orf35	1.61294	4.99581e-07	28.2045	68.4091	45.4923
PPAP2B	1.61342	2.69606e-10	1608.43	4345.41	2595.07
EMX2OS	1.61531	9.4397e-06	32.7727	73.1591	52.938
FAP	1.61594	4.83786e-08	687.5	1870.14	1110.96
LAT2	1.6187	1.40442e-08	426.136	1055.09	689.787
COCH	1.61877	0.00520779	163.659	398.591	264.927
ANGPT2	1.62025	0.000245403	994.636	2399.8	1611.56
TFAP2C	1.62195	0.00118061	1214.45	3345.07	1969.78
CD37	1.62488	1.22733e-05	1080.82	2373.41	1756.2
PLEK2	1.62504	0.000541805	432.477	1196.68	702.791
IL7R	1.62636	0.000210449	166.841	422.205	271.343
FPR2	1.62703	5.18727e-05	32.8409	86.5	53.4333
TNFRSF19	1.62868	2.84632e-07	4703.18	12944.2	7659.98
PROCR	1.63169	1.24278e-08	626.864	1603.34	1022.84
KCNC3	1.63183	3.0346e-09	145.795	385.523	237.913
SERPINA5	1.63186	0.00506508	1619.09	4405.39	2642.12
ZBTB46	1.63255	1.23901e-07	372.364	921.614	607.901
CCR6	1.63331	0.000217758	88.2955	189.318	144.214
ZNF521	1.63573	1.95572e-05	545.159	1455.07	891.736
RAC2	1.6394	6.63932e-06	2490.18	5860.27	4082.41
SPTBN5	1.64016	3.16665e-06	65.7273	199.727	107.803
PDLIM4	1.64093	0.000446097	1883.48	4947.2	3090.65
CDH11	1.64107	5.85252e-07	1135.39	2964.84	1863.25
LAMA4	1.64171	1.49276e-11	11716.1	31934.5	19234.4
TGFB1	1.64244	3.28539e-13	2696.16	6879.84	4428.28
FGF14	1.64308	0.000197071	49.4091	144.591	81.183
RAP1GAP2	1.64427	0.000120335	459.955	1262.68	756.29
ELTD1	1.64457	4.32326e-10	538.705	1428.73	885.939
CASS4	1.6486	7.56948e-08	55.3182	152.75	91.1976
ADAMTS12	1.65321	1.41597e-07	167.045	463.705	276.162
ICOSLG	1.65357	8.7675e-10	440.182	1201.86	727.871
ZNF467	1.65397	7.61404e-08	133.273	342.25	220.429
PVRL3	1.65432	5.93499e-06	405.136	1153.68	670.223
LAMB1	1.65446	1.50083e-12	12915.1	34775.6	21367.5
COLEC12	1.65714	5.03789e-08	548.023	1435.55	908.152
PGM2L1	1.65763	2.37345e-08	718.136	2018.39	1190.41
THY1	1.65893	2.33177e-09	3611.55	9014.27	5991.28
PRKCDBP	1.66204	2.00361e-09	1782.41	4726.64	2962.44
PLAC8	1.6621	0.000375383	100.432	223.795	166.928
H19	1.66488	6.89275e-05	6412.25	15229.5	10675.6
POU3F2	1.66662	0.000320697	326	895.955	543.319
RGS2	1.66804	1.84722e-07	1040.61	2810.82	1735.79
UNC5B	1.66944	2.17591e-11	1062.16	2840.98	1773.21
CCL2	1.67222	7.10782e-09	987.364	2561.55	1651.09
STX1B	1.67497	2.92825e-08	54.8409	145.182	91.857
AGAP2	1.67563	5.51801e-09	291.864	722.773	489.056
CR1	1.67582	5.40866e-05	230.068	540.932	385.552
COL5A2	1.67752	6.37944e-07	7637.8	21499.9	12812.5
HOTAIR	1.67834	0.00193036	39.7273	102.818	66.6759
CTGF	1.67877	5.81654e-07	4758.07	13789	7987.68
RGMA	1.6792	9.05519e-05	294.455	790.818	494.449
CNIH2	1.67935	7.0702e-08	103.136	268.25	173.202
DCBLD2	1.68306	2.60658e-08	8293.05	24444.7	13957.7
GABRD	1.68342	3.19689e-06	62.1136	165.659	104.563
ANKRD35	1.68622	2.93205e-07	29.2045	84.8864	49.2452
TGFB3	1.68643	3.07154e-11	777.182	2180.61	1310.66
TFR2	1.68692	3.8513e-05	84.7045	236.227	142.89
SYT6	1.69029	0.00259676	143.818	438.386	243.095
ADAMTS1	1.69154	3.13343e-10	2473.07	7566.64	4183.28
PREX2	1.69443	1.59578e-06	31.3409	82.2727	53.1051
NFE2	1.69571	5.73041e-05	42.0682	122	71.3354
FAM115C	1.69731	1.66188e-09	412.818	1126.41	700.681
PCDHB10	1.69769	3.13421e-06	176.023	495.682	298.833
GAD1	1.6979	0.00309156	53.1818	155.795	90.2974
PTPRE	1.70143	7.92831e-13	693.273	1978.95	1179.56
NID1	1.70283	3.17383e-08	12102.5	34499	20608.5
PTPN22	1.70337	6.55501e-06	185.023	500.318	315.162
RIN2	1.70392	2.289e-11	1295.7	3746.18	2207.78
TMEM132A	1.70508	3.08638e-12	2008.16	5496.3	3424.07
CRIP1	1.70674	4.24027e-08	733.5	1889.93	1251.89
NFE2L3	1.70711	1.14209e-10	1666.68	4842.68	2845.22
DUSP5	1.7081	9.08077e-08	1971.23	5933.48	3367.06
PAM	1.71032	1.40088e-08	4321.05	12124.5	7390.36
ADAMTS5	1.71117	4.38607e-10	233.386	647.159	399.363
B4GALNT1	1.71234	0.00013873	261.409	751.727	447.622
FGF11	1.7129	4.05836e-07	141.75	396.159	242.804
ZNF423	1.71315	4.70826e-06	147.773	362.818	253.157
DPYSL3	1.71376	1.24773e-11	3055.5	8658.84	5236.4
BAI1	1.71511	0.0028927	429.864	1467.89	737.263
SOX17	1.71613	1.48604e-08	64.8409	173.909	111.275
TNFRSF11B	1.71674	1.6715e-05	104.182	272.795	178.853
ST8SIA4	1.71992	1.21061e-12	494.523	1375.73	850.539
TAL1	1.7204	4.28463e-08	48	117.795	82.5792
STK17A	1.72192	4.8488e-14	1900.05	5590.25	3271.72
PLAUR	1.72285	6.70425e-06	3167.89	9087.16	5457.79
TNC	1.72509	8.73384e-07	27836.2	77273.1	48019.9
CABP1	1.72543	6.82051e-08	5.36364	15	9.2546
SLC22A17	1.72909	3.21917e-06	1445.43	4133.3	2499.29
ABCC9	1.73031	1.69443e-07	279.136	824.705	482.993
THSD4	1.73044	6.16115e-06	273.614	789.932	473.471
LGALS2	1.73212	0.000915549	44.7955	113.568	77.5911
SLC38A5	1.73248	7.02969e-06	229.955	578.136	398.392
CCND2	1.73274	6.83192e-08	965.568	2389.75	1673.08
JAKMIP2	1.73458	0.00119461	110.455	301.795	191.592
DGKA	1.73506	3.87995e-13	659.591	1782.55	1144.43
NID2	1.73847	6.21287e-10	906.818	2551.93	1576.47
BCL11B	1.74016	7.61054e-05	225.591	589.409	392.563
FAM26E	1.74028	2.036e-09	113.75	340.864	197.957
NOVA2	1.74035	1.80272e-13	54.7727	152.773	95.324
GJC3	1.74345	0.00264942	105.455	265.341	183.855
OSCAR	1.75039	4.50535e-08	196.909	503.114	344.667
ZNF469	1.75371	1.83689e-06	447.75	1364.07	785.225
MSX1	1.75457	1.53088e-07	292.182	799.727	512.653
ASGR1	1.75595	6.71619e-08	40.6818	109.159	71.4354
TFPI	1.75739	5.74865e-09	629.591	1688.39	1106.44
FAM101A	1.75856	1.1921e-05	78.3636	210.25	137.807
GMFG	1.76082	5.0255e-10	612.5	1654.84	1078.5
S1PR5	1.76127	3.34399e-07	50.0682	138.955	88.1837
COL1A1	1.7641	2.14262e-06	73689	195605	129994
CHN1	1.76495	9.73416e-10	815.318	2421.61	1439
KIRREL2	1.76913	0.000558198	29.1818	87.0227	51.6264
TNFRSF13C	1.77116	6.38492e-05	30.8409	77.4091	54.6241
CHRNA1	1.77211	0.00317739	260.727	659.227	462.037
FZD1	1.77256	9.21014e-11	2177.61	6398.93	3859.95
TTC9	1.77334	6.28335e-07	113.773	290.273	201.758
DMRTA1	1.77418	0.00158762	74.8864	240.205	132.862
IGLON5	1.77486	0.00186561	80.1818	225.909	142.311
PDZD2	1.77499	3.00488e-05	570.818	1710.59	1013.2
DSEL	1.77705	4.36687e-06	227.614	649.182	404.481
NLGN3	1.77854	0.000136825	456.364	1484.34	811.66
IL27RA	1.77864	2.95553e-11	879.091	2570.32	1563.58
CEACAM21	1.78105	1.63327e-06	48	127.114	85.4904
STEAP2	1.78107	3.06395e-06	197.886	588.682	352.45
SCN9A	1.78114	0.00104091	186.727	621.955	332.588
ADAMTS14	1.78277	5.43323e-05	242.273	826.386	431.916
FHL1	1.78361	1.4169e-08	1017.75	2934.43	1815.27
SDK2	1.78401	0.00236382	478.591	1632.57	853.809
RLTPR	1.78413	3.40708e-05	162.341	416.773	289.638
TPSAB1	1.78549	0.00046961	108.955	321.909	194.537
TNFRSF4	1.78728	1.338e-08	179.091	512.886	320.086
ZNF204P	1.78887	0.000137636	71.1136	208.477	127.213
ARSJ	1.78929	8.95533e-08	194.318	579.341	347.692
HRH1	1.7895	3.88519e-09	249.182	783.977	445.91
SLC2A5	1.79036	1.14413e-08	354.409	1036.23	634.521
DYNLT3	1.79733	5.28062e-08	1317.2	4002.23	2367.45
GJB3	1.79819	0.00586346	32.3409	94.1591	58.1552
MPZ	1.79936	0.00393262	7343.52	21092.4	13213.6
TF	1.80025	0.00647006	1822.61	4568.48	3281.15
AADACL3	1.8022	0.00751725	0.113636	0.590909	0.204796
LMO2	1.80254	5.89067e-11	352.205	924.227	634.864
FCGBP	1.80316	0.000405606	954	3187.91	1720.21
WWTR1	1.80351	6.1737e-12	2751.7	8835.59	4962.74
ADAM28	1.8044	1.66883e-06	125.636	339.045	226.699
HLA-DOB	1.80626	0.000230177	128.5	305.659	232.105
SOX2	1.80654	0.00202663	331.205	1037.34	598.333
FCGR2B	1.8081	1.06155e-08	495.273	1495.86	895.505
ADAM12	1.80831	1.3487e-09	1725.75	5429.5	3120.7
ECE1	1.80884	6.55676e-15	5817.55	18134.3	10523
TNFRSF11A	1.80946	3.01525e-07	75.6364	219	136.861
FAM46A	1.81004	1.37074e-14	1470.68	4464.18	2662
CD1C	1.81051	0.000279463	60	153.136	108.63
CDK14	1.81199	3.02572e-08	725.977	2208.91	1315.46
FABP7	1.81203	0.00937295	1020.93	3270.39	1849.95
TNFRSF12A	1.81556	4.3226e-09	1941	6165.18	3524.01
DPYD	1.81773	5.52616e-10	791.5	2321.82	1438.73
PCOLCE2	1.81909	1.88156e-05	288.273	866.545	524.395
SLC5A3	1.81925	3.52928e-07	5449.27	16440.9	9913.58
DLG4	1.81995	1.82303e-14	686.136	2093.59	1248.73
ADAMTS15	1.81997	7.59649e-06	48.1364	155.955	87.6067
EYA2	1.82013	3.34482e-07	48.9318	150.295	89.0625
SPIB	1.82205	0.00106839	146.614	324.659	267.137
PDGFRA	1.82246	7.67442e-09	761.432	2181.02	1387.68
ARHGEF6	1.82285	1.59124e-12	1356.05	4160.57	2471.87
WNT5B	1.82621	2.80358e-06	117.955	345.705	215.409
LYVE1	1.83235	4.37227e-05	201.682	642.364	369.552
WDR86	1.83311	1.92127e-05	31.3636	91.3182	57.4929
RND3	1.83474	2.44661e-11	2198.39	7111.86	4033.48
PKP3	1.83487	0.000521242	111.818	402.068	205.172
CD163L1	1.8359	9.80206e-07	197.864	572.023	363.257
NR5A1	1.83642	0.00164338	2.02273	4.97727	3.71457
KCNK1	1.83864	0.00212879	31.1818	102.205	57.332
FNDC4	1.83891	1.03533e-09	284.364	844.705	522.92
BRSK1	1.83893	1.13426e-08	606.182	2034.84	1114.72
JAM2	1.84018	3.69356e-12	117.636	342.773	216.472
A4GALT	1.84108	3.97944e-11	242.545	703.955	446.547
OAF	1.84558	1.38075e-10	3052.55	9941.02	5633.71
OSMR	1.84687	7.91574e-09	1382.86	4470.07	2553.96
KALRN	1.84903	1.88668e-08	527.318	1610.48	975.025
PRKAA2	1.85039	0.00290048	84.5455	260.432	156.442
TM4SF1	1.85239	7.78932e-07	3066.45	9952.14	5680.27
PLAC9	1.8541	9.34532e-07	63.7955	172.523	118.283
TMEM151B	1.85557	4.01609e-05	90.0455	212.659	167.085
FCER1G	1.85853	2.18527e-06	2113.41	5415.93	3927.83
DLX3	1.85926	0.00153708	31.1136	69.2955	57.8483
STAP1	1.85947	0.00142414	45.5455	104.205	84.6903
TNFRSF13B	1.86065	0.00435782	29.9773	74.0682	55.7774
IL6	1.86217	1.22262e-06	58.2273	195.477	108.429
ALOX5AP	1.86353	6.62691e-10	373.75	1128.23	696.496
CFB	1.86417	3.89621e-06	757.795	2163.16	1412.66
JSRP1	1.86566	0.000810249	28.4773	66.7727	53.1289
SEC14L2	1.86714	1.9418e-10	702.864	2368.48	1312.35
PDGFRL	1.87227	6.93738e-08	205.318	608.227	384.41
ITGB3	1.87261	7.63911e-06	4978.93	16879.1	9323.58
TRPS1	1.87554	1.42271e-12	664.659	2078.34	1246.59
DTX1	1.87837	6.63833e-08	220.227	600.273	413.668
ARL4C	1.88172	3.49671e-12	2085.27	6884.61	3923.89
LOX	1.88181	1.23598e-10	722.977	2240.09	1360.5
GPC4	1.88501	6.5402e-05	975	3288.5	1837.88
RNF152	1.88513	1.36975e-10	34.8182	116.227	65.6367
FGF2	1.88626	7.87343e-07	438.75	1403.68	827.598
MMP12	1.88844	0.00218053	137.909	465.205	260.432
SDK1	1.89008	7.7277e-06	143.955	414	272.086
NAP1L3	1.89176	2.87738e-06	159.614	485.727	301.951
AQP5	1.89235	0.00678319	39.5909	125.045	74.9198
MDFI	1.89262	0.000427861	734.273	2285.5	1389.7
EHF	1.89851	0.000703532	65.6136	244.341	124.568
IRAK2	1.89937	4.40264e-14	206.523	672.659	392.263
SEMA7A	1.9055	1.03548e-07	3886.82	13177.1	7406.31
ELMO1	1.90696	3.48697e-12	728.341	2232.91	1388.91
CPT1C	1.9086	1.04506e-07	214.682	680.205	409.742
XPNPEP2	1.91246	7.5293e-05	42.25	123.659	80.8013
AFAP1L2	1.91468	1.91322e-08	2178.11	7095.68	4170.39
FAM20A	1.91489	3.19951e-08	639.045	2017.11	1223.7
CDH19	1.91592	1.18255e-05	4006.41	14100.8	7675.97
RGAG4	1.91593	4.1424e-10	367.864	1149.39	704.799
NCR3	1.91653	6.01058e-06	26.7727	72.1818	51.3108
RASL12	1.91864	1.43429e-12	222.886	669.455	427.639
ITGA11	1.91914	8.81685e-08	367.455	1076.52	705.197
CLGN	1.92111	0.00034634	66.2273	224.545	127.23
P2RY1	1.92305	1.37792e-09	131	464.364	251.92
ZNF365	1.92394	5.007e-05	256.386	898.068	493.273
RSPO3	1.92419	3.18878e-06	41.4545	117.159	79.7665
DHRS3	1.92655	3.07161e-12	1203.64	3832	2318.86
VEGFA	1.9279	4.59742e-10	2780.86	9651.75	5361.23
HOXA7	1.93287	2.45554e-05	173.818	555.818	335.967
SLC26A10	1.93292	5.59297e-07	42.2727	141.455	81.7096
NR2F1	1.93336	8.2361e-09	267.477	842.273	517.131
MOXD1	1.93511	3.56856e-05	2930.39	10088.1	5670.62
C15orf27	1.93588	6.27557e-05	52.1136	178.773	100.886
MGLL	1.93761	2.21628e-11	2452.16	7773.82	4751.33
CLIC6	1.93822	1.1021e-06	78.5682	256.659	152.282
CNTN3	1.93847	0.00209388	76.8409	238.023	148.954
FAM105A	1.93903	3.13607e-09	308.568	1019.5	598.322
OLFM2	1.94131	3.47093e-06	543.341	1742.14	1054.79
SLC16A14	1.94618	1.7165e-11	62.8182	242.341	122.255
PCDHB18	1.94725	5.58322e-07	33.1136	106.568	64.4805
IL17B	1.95218	0.00230539	42.9545	135.932	83.855
NPAS1	1.95547	2.70292e-06	68.4318	219.182	133.816
MT1X	1.95798	1.71366e-12	646.364	2350.77	1265.57
NEBL	1.95815	9.34205e-06	89.5	361.591	175.254
PALM2	1.95893	2.96463e-06	223.318	755.227	437.466
HCN1	1.96062	0.00480265	96.8409	367.227	189.868
PARM1	1.9615	4.54662e-07	588.614	1835.66	1154.57
TPBG	1.96505	1.2932e-08	452.864	1489.11	889.901
ASTN2	1.96515	3.18412e-07	581	2077.34	1141.75
TMEM154	1.96748	1.88002e-09	132.568	441.523	260.826
PTGS1	1.96791	5.88158e-15	384.023	1298.48	755.722
IL17RD	1.96971	1.39905e-05	1285.23	3904.61	2531.53
DNASE1L3	1.97097	0.0011107	66.75	176.364	131.562
SNCG	1.97203	1.41597e-07	86.4773	271.614	170.536
PLA2R1	1.97316	4.00724e-07	158.386	544.5	312.521
CTSG	1.97623	0.00161412	42.1364	154.455	83.2713
NAP1L2	1.98271	0.000369309	42.3636	121.045	83.9946
TPSB2	1.98278	0.000191704	188.841	667.318	374.431
CD79A	1.98512	0.000714322	764.75	1930.34	1518.12
CCDC152	1.98517	2.33237e-06	115.705	351.455	229.693
TRPM3	1.98713	9.6473e-06	44.5682	150.955	88.5629
COL1A2	1.98736	4.30904e-09	53530.9	167524	106385
FAM171A1	1.9881	5.49996e-07	457.523	1492.25	909.601
COL5A1	1.98885	4.08782e-08	6199.86	20475	12330.6
MT2A	1.9897	7.17609e-09	11746.5	42233	23372
COL6A3	1.99374	9.60948e-09	18444.8	66354.8	36774.1
PMAIP1	1.9973	3.0456e-11	481.023	1622.86	960.746
CCL13	2	0.0001354	98.7273	359.409	197.455
UBE2QL1	2.00641	7.01052e-08	26.8864	84.0227	53.9451
CHST2	2.01155	6.006e-13	1243.84	4191.14	2502.05
B4GALNT4	2.01246	4.25369e-05	490.977	1627.8	988.073
LRIG1	2.01377	3.09365e-11	665.818	2364.68	1340.81
FCRL2	2.01439	0.00169729	33.7045	95.0909	67.8941
CPXM2	2.01702	0.00010477	1053	3798.41	2123.92
CADM4	2.01991	6.15573e-08	1934.05	6943.2	3906.6
PCDHA7	2.02025	0.000113722	42.3409	150	85.5391
HIC1	2.02076	6.7815e-12	241.455	797.545	487.923
FCGR3B	2.02167	9.13336e-06	40.0455	134.273	80.9588
GLDC	2.02311	1.18382e-05	395.364	1282.93	799.864
LAMA2	2.02514	1.64007e-08	442.136	1475.2	895.389
SLC6A1	2.02518	6.41181e-09	25.8409	102	52.3326
ITGA2	2.0294	3.31605e-10	970.295	3558.2	1969.11
TLL1	2.0301	7.48023e-06	35.7955	110.705	72.6684
TIMP4	2.0324	0.000190274	49.0909	181.227	99.7723
FREM1	2.03573	0.0016989	758.455	2820.11	1544.01
AGPAT9	2.03759	2.46166e-05	453.205	1504.18	923.445
TMSB15B	2.03806	2.97395e-08	57.4773	182.318	117.142
POU2F2	2.03891	1.54112e-08	335.727	1140.59	684.517
ADAMTS10	2.03959	4.54055e-08	113.5	362.955	231.494
UNC13A	2.04376	1.50855e-06	59.0227	220.182	120.628
IGSF9B	2.04384	1.13374e-05	35.3182	128.136	72.1846
PRRT2	2.04428	2.83404e-09	112.25	395.182	229.471
SAMD12	2.04766	4.37151e-05	54.0682	188.864	110.713
MT1M	2.04836	1.33979e-05	89.5	335.273	183.328
CDH23	2.04863	4.50308e-11	38.0909	118.955	78.0343
ABCC3	2.0497	2.52765e-09	160.045	515.182	328.045
SEMA3G	2.04977	1.04697e-11	283.909	1044.16	581.947
SCARA3	2.05158	3.57291e-08	387.295	1283.66	794.568
LPHN2	2.05259	3.18328e-08	702.068	2605.45	1441.06
KRT23	2.05412	0.00185114	38	154	78.0567
SEMA3B	2.05624	1.94715e-06	4105.86	14378.6	8442.64
CLU	2.05934	1.39545e-05	3975	12205.8	8185.88
ZCCHC18	2.06	1.39091e-12	28.6591	96.8636	59.0377
ZFPM2	2.06061	8.20585e-09	82.6591	279.659	170.328
PCDHA6	2.06195	9.59297e-05	35.4091	139.591	73.0118
LAMB3	2.06339	7.42086e-08	1315.18	5275.75	2713.74
RNASE2	2.06515	1.96046e-12	25.4545	89.8636	52.5675
PALM3	2.0682	0.000202787	68.1591	236.727	140.967
OCIAD2	2.07139	7.38345e-07	376.364	1275.18	779.596
CHRD	2.07172	1.32463e-11	91.5909	312.114	189.751
S100A16	2.07268	1.34006e-11	5609.98	20202.4	11627.7
FOXF1	2.07362	9.89137e-07	59.9318	200.75	124.276
THRB	2.0766	4.06262e-06	128.932	453.455	267.74
TNFRSF25	2.07869	9.96981e-13	52.9091	190.364	109.982
PDE7B	2.08026	1.42801e-07	337.886	1163.14	702.891
SOD3	2.08395	1.06365e-05	1297.02	4118.93	2702.93
CFI	2.08463	1.53495e-06	1392	5157.59	2901.81
TNFRSF10A	2.08474	3.15964e-07	109.795	389.364	228.895
RASAL1	2.08483	0.00112417	99.7727	372.568	208.01
ADORA1	2.08538	6.02937e-08	152.114	557.932	317.214
C12orf75	2.08888	1.28049e-09	315.227	1182.14	658.473
STC2	2.08937	2.68065e-12	227.432	872.568	475.189
PNOC	2.09632	0.000160124	39.8409	125.591	83.5191
ABI3BP	2.10202	3.0812e-06	490.432	1830.77	1030.9
CDC42EP5	2.10244	6.47679e-14	200.932	737.023	422.447
ECSCR	2.10306	1.60696e-10	75.4091	265.273	158.59
DOCK4	2.10507	2.90933e-17	1020.36	3956.34	2147.94
TREML2	2.10901	1.75963e-05	26.1818	75.2273	55.2176
ITGA1	2.10972	1.11331e-14	1201.55	4696.86	2534.92
LRRC15	2.11238	6.36584e-05	657.818	2443.75	1389.56
C1orf106	2.1124	0.000265849	148.545	480.705	313.787
EGFL6	2.11457	5.23327e-07	55.7273	178.114	117.839
BATF3	2.11541	2.52757e-14	75.6136	279.136	159.954
ITGA5	2.11991	1.86136e-13	3917.23	15024.7	8304.17
LRRN3	2.12525	9.55104e-07	60.9773	219.932	129.592
PDGFA	2.12762	6.09448e-09	1402.73	5271.41	2984.48
SLC22A3	2.13459	1.11412e-05	68.9773	219.841	147.238
SERPINA1	2.13645	6.94569e-07	2057.05	6558.5	4394.78
RASGRP2	2.13695	7.99137e-07	180.045	575.75	384.748
SYTL4	2.13868	3.84154e-13	166.864	615.182	356.868
RNF175	2.14146	0.000212667	183.795	752.205	393.591
PCYT1B	2.14642	1.5222e-06	109.045	409.841	234.058
FOSL1	2.14658	2.57647e-08	1161.66	4669.3	2493.59
SUSD4	2.14761	4.29339e-06	29.1591	106.75	62.6224
DIO2	2.14913	2.85375e-08	206.114	815.159	442.965
IGSF21	2.1494	3.14219e-07	41.75	165.386	89.7375
NRXN3	2.14974	1.4303e-06	222.273	825.932	477.828
S1PR3	2.15559	7.26675e-13	491.636	1897.02	1059.77
PDE8B	2.15641	1.16524e-08	31.0909	111.841	67.0446
PRIMA1	2.15929	0.00340554	432.045	1951.09	932.913
COL11A2	2.1619	0.000130186	1934.95	7482.84	4183.17
PLCE1	2.16623	1.27905e-10	230.864	928.114	500.105
ACTN2	2.16828	6.73752e-06	41.6136	169.114	90.2299
STON2	2.16855	3.73278e-10	77.5227	299.341	168.112
KIF5C	2.16868	3.15646e-06	319	1125.36	691.809
EFNB2	2.1689	4.0903e-13	857.341	3431.77	1859.49
PDGFC	2.17039	6.28398e-10	392.273	1708.77	851.383
DNM1	2.17168	9.92318e-15	499.409	1922.45	1084.55
MARCO	2.17522	8.28459e-05	373.273	1323.91	811.952
KCNMB4	2.1794	8.83827e-07	285.295	1108.11	621.772
MRGPRX4	2.18135	0.00569895	94.6364	357.091	206.435
[truncated: 657 more rows]

## Sheet: DEG siMITFvs.siCTRL-501Mel
DEG siMITFvs.siCTRL-501Mel
target_id	ensembl_gene_id	gene_symbol	gene_name	target_id2	pval	qval	test_stat	rss	degrees_free	mean_obs	var_obs	tech_var	sigma_sq	smooth_sigma_sq	final_sigma_sq	Beta estimate	tpm_control	tpm_siMITF	Ratio	log2
ENST00000237500.9	ENSG00000118680	MYL12B	myosin light chain 12B [Source:HGNC Symbol;Acc:HGNC:29827]	protein_coding	7.04e-10	1.73e-05	38.0104	6.8172	1	8.20268	1.36344	0.000506872	1.36293	0.0192494	1.36293	-2.13125	142.129	16.7581	0.1177	-3.08681
ENST00000367609.7	ENSG00000112414	ADGRG6	adhesion G protein-coupled receptor G6 [Source:HGNC Symbol;Acc:HGNC:13841]	protein_coding	2.45e-10	1.73e-05	40.0705	131.326	1	3.98419	26.2651	0.0100968	26.255	0.0853741	26.255	-9.35468	11.2165	7.55e-11	6.59e-12	-37.1435
ENST00000434579.6	ENSG00000226869	LHFPL3-AS1	LHFPL3 antisense RNA 1 [Source:HGNC Symbol;Acc:HGNC:40341]	antisense	7.02e-10	1.73e-05	38.0152	14.5962	1	7.39309	2.91924	0.00337516	2.91587	0.0253546	2.91587	-3.1184	126.88	5.56906	0.0438061	-4.51272
ENST00000394351.8	ENSG00000187098	MITF	melanocyte inducing transcription factor [Source:HGNC Symbol;Acc:HGNC:7105]	protein_coding	1.03e-09	1.75e-05	37.2766	5.5893	1	9.41612	1.11786	0.000334529	1.11753	0.0136161	1.11753	-1.92867	97.6894	14.1488	0.144465	-2.79121
ENST00000366592.8	ENSG00000077585	GPR137B	G protein-coupled receptor 137B [Source:HGNC Symbol;Acc:HGNC:11862]	protein_coding	5.22e-09	1.79e-05	34.106	3.14328	1	8.45022	0.628655	0.000388235	0.628267	0.0178103	0.628267	-1.44676	69.4219	16.2602	0.233382	-2.09924
ENST00000340342.10	ENSG00000135047	CTSL	cathepsin L [Source:HGNC Symbol;Acc:HGNC:2537]	protein_coding	3.88e-09	1.79e-05	34.6842	3.54402	1	8.94734	0.708804	0.000319473	0.708485	0.0153989	0.708485	-1.53542	179.567	38.5573	0.214425	-2.22146
ENST00000371933.8	ENSG00000159658	EFCAB14	EF-hand calcium binding domain 14 [Source:HGNC Symbol;Acc:HGNC:29051]	protein_coding	5.1e-09	1.79e-05	34.1496	2.9144	1	8.90625	0.58288	0.000153435	0.582726	0.0155764	0.582726	-1.39245	34.1355	8.45548	0.245903	-2.02384
ENST00000374279.4	ENSG00000148154	UGCG	UDP-glucose ceramide glucosyltransferase [Source:HGNC Symbol;Acc:HGNC:12524]	protein_coding	3.05e-09	1.79e-05	35.1525	2.99304	1	9.52588	0.598608	0.000104631	0.598503	0.0132577	0.598503	-1.41116	96.0364	23.3682	0.242694	-2.04279
ENST00000053468.4	ENSG00000048544	MRPS10	mitochondrial ribosomal protein S10 [Source:HGNC Symbol;Acc:HGNC:14502]	protein_coding	5.19e-09	1.79e-05	34.1168	5.54216	1	7.85525	1.10843	0.000568089	1.10786	0.0215831	1.10786	-1.91976	46.824	6.8427	0.145361	-2.78229
ENST00000409458.3	ENSG00000136235	GPNMB	glycoprotein nmb [Source:HGNC Symbol;Acc:HGNC:4462]	protein_coding	3.93e-09	1.79e-05	34.6575	6.77827	1	8.62479	1.35565	0.000370649	1.35528	0.0168953	1.35528	-2.12264	145.395	17.3506	0.119129	-3.0694
ENST00000341459.7	ENSG00000188467	SLC24A5	solute carrier family 24 member 5 [Source:HGNC Symbol;Acc:HGNC:20611]	protein_coding	4.42e-09	1.79e-05	34.4275	2.31533	1	9.32991	0.463066	0.000148691	0.462917	0.0139125	0.462917	-1.24164	163.434	47.0416	0.287393	-1.7989
ENST00000380420.10	ENSG00000087842	PIR	pirin [Source:HGNC Symbol;Acc:HGNC:30048]	protein_coding	5.16e-09	1.79e-05	34.1294	3.19001	1	8.53698	0.638002	0.000271436	0.63773	0.0173458	0.63773	-1.45713	132.853	30.7499	0.231023	-2.11389
ENST00000324453.13	ENSG00000180354	MTURN	maturin, neural progenitor differentiation regulator homolog [Source:HGNC Symbol;Acc:HGNC:25457]	protein_coding	3.79e-09	1.79e-05	34.7297	4.67667	1	8.37472	0.935335	0.000364086	0.934971	0.018231	0.934971	-1.7637	24.3589	4.1665	0.169309	-2.56227
ENST00000449260.6	ENSG00000185664	PMEL	premelanosome protein [Source:HGNC Symbol;Acc:HGNC:10880]	protein_coding	2.62e-09	1.79e-05	35.4454	4.29145	1	10.5865	0.858289	0.000376889	0.857913	0.0107258	0.857913	-1.68926	630.895	116.126	0.183992	-2.44228
ENST00000369535.5	ENSG00000213281	NRAS	NRAS proto-oncogene, GTPase [Source:HGNC Symbol;Acc:HGNC:7989]	protein_coding	2.63e-09	1.79e-05	35.4398	2.32574	1	9.38629	0.465148	8.89e-05	0.465059	0.0137171	0.465059	-1.24503	69.9355	20.057	0.285771	-1.80707
ENST00000254301.14	ENSG00000131981	LGALS3	galectin 3 [Source:HGNC Symbol;Acc:HGNC:6563]	protein_coding	5.57e-09	1.79e-05	33.9781	3.91089	1	9.04663	0.782177	0.000200293	0.781977	0.0149848	0.781977	-1.61206	346.364	68.7533	0.198357	-2.33383
ENST00000269346.9	ENSG00000141540	TTYH2	tweety family member 2 [Source:HGNC Symbol;Acc:HGNC:13877]	protein_coding	5.31e-09	1.79e-05	34.073	3.73345	1	8.51849	0.746691	0.000384419	0.746306	0.0174431	0.746306	-1.57582	44.4025	9.1443	0.204788	-2.2878
ENST00000650405.1	ENSG00000249937	LINC02223	long intergenic non-protein coding RNA 2223 [Source:HGNC Symbol;Acc:HGNC:53092]	lincRNA	1.9e-09	1.79e-05	36.0754	17.4532	1	6.92791	3.49064	0.00441579	3.48623	0.0299624	3.48623	-3.40807	16.364	0.538931	0.0324383	-4.94616
ENST00000374586.8	ENSG00000106771	TMEM245	transmembrane protein 245 [Source:HGNC Symbol;Acc:HGNC:1363]	protein_coding	7.29e-09	1.89e-05	33.4568	2.37648	1	8.84081	0.475296	0.000224083	0.475072	0.0158667	0.475072	-1.25778	21.4403	6.07733	0.280186	-1.83554
ENST00000260126.9	ENSG00000137571	SLCO5A1	solute carrier organic anion transporter family member 5A1 [Source:HGNC Symbol;Acc:HGNC:19046]	protein_coding	7.13e-09	1.89e-05	33.4993	2.73072	1	8.78984	0.546144	0.00018525	0.545959	0.0160996	0.545959	-1.34773	18.8779	4.89079	0.255689	-1.96754
ENST00000631460.1	ENSG00000048740	CELF2	CUGBP Elav-like family member 2 [Source:HGNC Symbol;Acc:HGNC:2550]	protein_coding	7.18e-09	1.89e-05	33.4868	3.75386	1	8.12675	0.750772	0.00119183	0.749581	0.0197266	0.749581	-1.58103	18.1193	3.70846	0.201884	-2.30841
ENST00000260130.9	ENSG00000137575	SDCBP	syndecan binding protein [Source:HGNC Symbol;Acc:HGNC:10662]	protein_coding	7.18e-09	1.89e-05	33.4852	3.84639	1	10.0968	0.769278	0.000171675	0.769106	0.0117028	0.769106	-1.59848	379.945	76.727	0.201809	-2.30893
ENST00000266970.9	ENSG00000123374	CDK2	cyclin dependent kinase 2 [Source:HGNC Symbol;Acc:HGNC:1771]	protein_coding	9.96e-09	2.18e-05	32.8497	1.67404	1	10.6797	0.334807	3.45e-05	0.334773	0.0105724	0.334773	-1.05492	475.474	164.92	0.346672	-1.52836
ENST00000398136.7	ENSG00000152558	TMEM123	transmembrane protein 123 [Source:HGNC Symbol;Acc:HGNC:30138]	protein_coding	1.12e-08	2.36e-05	32.6138	1.67437	1	9.15659	0.334874	0.000230775	0.334643	0.01455	0.334643	-1.05616	67.5048	23.3805	0.345076	-1.53501
ENST00000397204.8	ENSG00000092529	CAPN3	calpain 3 [Source:HGNC Symbol;Acc:HGNC:1480]	protein_coding	1.27e-08	2.54e-05	32.384	9.71665	1	7.04252	1.94333	0.00911264	1.93422	0.0287531	1.93422	-2.54313	53.2006	4.17858	0.0781765	-3.67712
ENST00000351193.6	ENSG00000169251	NMD3	NMD3 ribosome export adaptor [Source:HGNC Symbol;Acc:HGNC:24250]	protein_coding	1.28e-08	2.54e-05	32.36	2.4231	1	8.55814	0.484621	0.000215068	0.484406	0.0172354	0.484406	-1.26939	45.0698	12.6273	0.278626	-1.8436
ENST00000494857.5	ENSG00000003989	SLC7A2	solute carrier family 7 member 2 [Source:HGNC Symbol;Acc:HGNC:11060]	protein_coding	1.29e-08	2.54e-05	32.3467	2.87327	1	8.55284	0.574654	0.000514565	0.574139	0.0172629	0.574139	-1.38185	17.9643	4.50542	0.247356	-2.01534
[truncated: 1,097 more rows]

## Sheet: DEG siMITFvs.siCTRL-SkMel28
DEG siMITFvs.siCTRL-SkMel28
target_id	ensembl_gene_id	gene_symbol	full_name	biotype	pval	qval	test_stat	rss	degrees_free	mean_obs	var_obs	tech_var	sigma_sq	smooth_sigma_sq	final_sigma_sq	estimate	log2fc
[truncated: 2,255 more rows]

## Sheet: DEG OE.MITFvs.EVA375P
DEG OE.MITFvs.EVA375P
[truncated: 14,899 more rows]
