# Supplementary material for: MITF reprograms the extracellular matrix and focal adhesion in melanoma
Source: eLife. 2021 Jan 13;10:e63093. doi: 10.7554/eLife.63093 (PMC7857731; doi:10.7554/eLife.63093)
Supplement: Supplementary file 2. — MITF targets in differentially expressed genes in ∆MITF-X6 vs. SkMel28. [file elife-63093-supp2.xlsx]

## Sheet: CutandRunMITFChIPseq-all
CutandRun MITF peak associated genes
seqnames	start	end	width	strand	V4	V5	V6	V7	V8	V9	V10	annotation	geneChr	geneStart	geneEnd	geneLength	geneStrand	geneId	transcriptId	distanceToTSS	ENSEMBL	SYMBOL	GENENAME
chr1	566064	566750	687	*	CK6___lt__120_BAM_filter_on_data_707_peak_7a	1757	.	6.10217	181.684	175.797	102	Exon (uc021oej.1/uc021oej.1, exon 1 of 1)	1	621096	622034	939	2	729759	uc010nxv.2	55284	ENSG00000284733	OR4F29	olfactory receptor family 4 subfamily F member 29
chr1	566064	566750	687	*	CK6___lt__120_BAM_filter_on_data_707_peak_7a	1757	.	6.10217	181.684	175.797	102	Exon (uc021oej.1/uc021oej.1, exon 1 of 1)	1	621096	622034	939	2	729759	uc010nxv.2	55284	ENSG00000284733	OR4F29	olfactory receptor family 4 subfamily F member 29
chr1	566064	566750	687	*	CK6___lt__120_BAM_filter_on_data_707_peak_7a	1757	.	6.10217	181.684	175.797	102	Exon (uc021oej.1/uc021oej.1, exon 1 of 1)	1	621096	622034	939	2	729759	uc010nxv.2	55284	ENSG00000284733	OR4F29	olfactory receptor family 4 subfamily F member 29
chr1	566064	566750	687	*	CK6___lt__120_BAM_filter_on_data_707_peak_7b	719	.	3.94184	76.6521	71.9862	398	Exon (uc021oej.1/uc021oej.1, exon 1 of 1)	1	621096	622034	939	2	729759	uc010nxv.2	55284	ENSG00000284733	OR4F29	olfactory receptor family 4 subfamily F member 29
chr1	566064	566750	687	*	CK6___lt__120_BAM_filter_on_data_707_peak_7b	719	.	3.94184	76.6521	71.9862	398	Exon (uc021oej.1/uc021oej.1, exon 1 of 1)	1	621096	622034	939	2	729759	uc010nxv.2	55284	ENSG00000284733	OR4F29	olfactory receptor family 4 subfamily F member 29
chr1	566064	566750	687	*	CK6___lt__120_BAM_filter_on_data_707_peak_7b	719	.	3.94184	76.6521	71.9862	398	Exon (uc021oej.1/uc021oej.1, exon 1 of 1)	1	621096	622034	939	2	729759	uc010nxv.2	55284	ENSG00000284733	OR4F29	olfactory receptor family 4 subfamily F member 29
chr1	566064	566750	687	*	CK6___lt__120_BAM_filter_on_data_707_peak_7c	627	.	3.70997	67.2058	62.7005	628	Exon (uc021oej.1/uc021oej.1, exon 1 of 1)	1	621096	622034	939	2	729759	uc010nxv.2	55284	ENSG00000284733	OR4F29	olfactory receptor family 4 subfamily F member 29
chr1	566064	566750	687	*	CK6___lt__120_BAM_filter_on_data_707_peak_7c	627	.	3.70997	67.2058	62.7005	628	Exon (uc021oej.1/uc021oej.1, exon 1 of 1)	1	621096	622034	939	2	729759	uc010nxv.2	55284	ENSG00000284733	OR4F29	olfactory receptor family 4 subfamily F member 29
chr1	566064	566750	687	*	CK6___lt__120_BAM_filter_on_data_707_peak_7c	627	.	3.70997	67.2058	62.7005	628	Exon (uc021oej.1/uc021oej.1, exon 1 of 1)	1	621096	622034	939	2	729759	uc010nxv.2	55284	ENSG00000284733	OR4F29	olfactory receptor family 4 subfamily F member 29
chr1	568793	568925	133	*	CK6___lt__120_BAM_filter_on_data_707_peak_10	554	.	3.52069	59.8283	55.4568	64	Exon (uc001abb.3/uc001abb.3, exon 1 of 1)	1	621096	622034	939	2	729759	uc010nxv.2	53109	ENSG00000284733	OR4F29	olfactory receptor family 4 subfamily F member 29
chr1	714055	714229	175	*	CK6___lt__120_BAM_filter_on_data_707_peak_14	106	.	8.57001	13.728	10.6554	95	Promoter (<=1kb)	1	700245	714068	13824	2	100288069	uc001abo.3	0	NA	LOC100288069	uncharacterized LOC100288069
chr1	911556	911671	116	*	CK6___lt__120_BAM_filter_on_data_707_peak_21	105	.	8.31741	13.5797	10.5144	51	Promoter (<=1kb)	1	910579	912021	1443	2	84808	uc001acg.2	350	ENSG00000187642	PERM1	PPARGC1 and ESRR induced regulator, muscle 1
chr1	1014647	1015034	388	*	CK6___lt__120_BAM_filter_on_data_707_peak_25b	133	.	8.9381	16.5717	13.3744	364	Downstream (2-3kb)	1	1007126	1009687	2562	2	401934	uc021oen.1	-4960	ENSG00000237330	RNF223	ring finger protein 223
chr1	1051513	1051823	311	*	CK6___lt__120_BAM_filter_on_data_707_peak_26	550	.	23.2403	59.3962	55.0322	106	Promoter (<=1kb)	1	1017198	1051736	34539	2	54991	uc001acr.2	0	ENSG00000131591	C1orf159	chromosome 1 open reading frame 159
chr1	1051513	1051823	311	*	CK6___lt__120_BAM_filter_on_data_707_peak_26	550	.	23.2403	59.3962	55.0322	106	Promoter (<=1kb)	1	1017198	1051736	34539	2	54991	uc001acr.2	0	ENSG00000131591	C1orf159	chromosome 1 open reading frame 159
chr1	1167364	1167660	297	*	CK6___lt__120_BAM_filter_on_data_707_peak_29	262	.	14.6923	29.884	26.2292	199	Promoter (<=1kb)	1	1167629	1170420	2792	1	126792	uc001adk.3	0	ENSG00000176022	B3GALT6	beta-1,3-galactosyltransferase 6
chr1	1167364	1167660	297	*	CK6___lt__120_BAM_filter_on_data_707_peak_29	262	.	14.6923	29.884	26.2292	199	Promoter (<=1kb)	1	1167629	1170420	2792	1	126792	uc001adk.3	0	ENSG00000176022	B3GALT6	beta-1,3-galactosyltransferase 6
chr1	1209242	1209412	171	*	CK6___lt__120_BAM_filter_on_data_707_peak_31	87	.	7.5994	11.6889	8.71682	88	Promoter (<=1kb)	1	1189292	1209234	19943	2	118424	uc001adr.3	-8	ENSG00000160087	UBE2J2	ubiquitin conjugating enzyme E2 J2
chr1	1243732	1244040	309	*	CK6___lt__120_BAM_filter_on_data_707_peak_33	201	.	10.9315	23.5574	20.1009	187	Promoter (<=1kb)	1	1243994	1247057	3064	1	126789	uc001aed.3	0	ENSG00000169972	PUSL1	pseudouridylate synthase-like 1
chr1	1284765	1284935	171	*	CK6___lt__120_BAM_filter_on_data_707_peak_35	143	.	10.4119	17.5574	14.3201	62	Promoter (<=1kb)	1	1270658	1284492	13835	2	1855	uc001aer.4	-273	ENSG00000107404	DVL1	dishevelled segment polarity protein 1
chr1	1310637	1310956	320	*	CK6___lt__120_BAM_filter_on_data_707_peak_36	414	.	18.752	45.4665	41.4004	140	Promoter (<=1kb)	1	1309110	1310818	1709	2	54998	uc001afc.2	0	ENSG00000175756	AURKAIP1	aurora kinase A interacting protein 1
chr1	1334721	1334980	260	*	CK6___lt__120_BAM_filter_on_data_707_peak_37	272	.	14.5912	30.8969	27.2128	165	Promoter (<=1kb)	1	1334910	1337426	2517	1	148413	uc001afm.3	0	ENSG00000224870	LOC148413	uncharacterized LOC148413
chr1	1345376	1346060	685	*	CK6___lt__120_BAM_filter_on_data_707_peak_38b	476	.	15.8787	51.8475	47.6359	412	Promoter (2-3kb)	1	1340413	1342693	2281	2	55052	uc010nyn.1	-2683	ENSG00000242485	MRPL20	mitochondrial ribosomal protein L20
chr1	1345376	1346060	685	*	CK6___lt__120_BAM_filter_on_data_707_peak_38b	476	.	15.8787	51.8475	47.6359	412	Promoter (2-3kb)	1	1340413	1342693	2281	2	55052	uc010nyn.1	-2683	ENSG00000242485	MRPL20	mitochondrial ribosomal protein L20
chr1	1358212	1358393	182	*	CK6___lt__120_BAM_filter_on_data_707_peak_39	338	.	18.1553	37.6871	33.8152	120	Promoter (1-2kb)	1	1353800	1356824	3025	2	441869	uc010nyo.2	-1388	ENSG00000235098	ANKRD65	ankyrin repeat domain 65
chr1	1440436	1440610	175	*	CK6___lt__120_BAM_filter_on_data_707_peak_44	83	.	7.3539	11.3263	8.37253	52	Intron (uc021oeq.1/83858, intron 7 of 7)	1	1447523	1470067	22545	1	55210	uc001afz.2	-6913	ENSG00000197785	ATAD3A	ATPase family, AAA domain containing 3A
chr1	1440924	1441091	168	*	CK6___lt__120_BAM_filter_on_data_707_peak_45	109	.	8.57955	13.9882	10.9034	104	Intron (uc021oeq.1/83858, intron 7 of 7)	1	1447523	1470067	22545	1	55210	uc001afz.2	-6432	ENSG00000197785	ATAD3A	ATPase family, AAA domain containing 3A
chr1	1447341	1447503	163	*	CK6___lt__120_BAM_filter_on_data_707_peak_46	154	.	10.7199	18.7389	15.4564	134	Promoter (<=1kb)	1	1447523	1470067	22545	1	55210	uc001afz.2	-20	ENSG00000197785	ATAD3A	ATPase family, AAA domain containing 3A
chr1	1502698	1503407	710	*	CK6___lt__120_BAM_filter_on_data_707_peak_47a	358	.	11.5287	39.7352	35.8099	133	Intron (uc001agd.3/29101, intron 1 of 4)	1	1477053	1510262	33210	2	29101	uc001agd.3	6855	ENSG00000160075	SSU72	SSU72 homolog, RNA polymerase II CTD phosphatase
chr1	1502698	1503407	710	*	CK6___lt__120_BAM_filter_on_data_707_peak_47a	358	.	11.5287	39.7352	35.8099	133	Intron (uc001agd.3/29101, intron 1 of 4)	1	1477053	1510262	33210	2	29101	uc001agd.3	6855	ENSG00000160075	SSU72	SSU72 homolog, RNA polymerase II CTD phosphatase
chr1	1502698	1503407	710	*	CK6___lt__120_BAM_filter_on_data_707_peak_47a	358	.	11.5287	39.7352	35.8099	133	Intron (uc001agd.3/29101, intron 1 of 4)	1	1477053	1510262	33210	2	29101	uc001agd.3	6855	ENSG00000160075	SSU72	SSU72 homolog, RNA polymerase II CTD phosphatase
chr1	1502698	1503407	710	*	CK6___lt__120_BAM_filter_on_data_707_peak_47b	542	.	15.0873	58.5567	54.2083	364	Intron (uc001agd.3/29101, intron 1 of 4)	1	1477053	1510262	33210	2	29101	uc001agd.3	6855	ENSG00000160075	SSU72	SSU72 homolog, RNA polymerase II CTD phosphatase
chr1	1502698	1503407	710	*	CK6___lt__120_BAM_filter_on_data_707_peak_47b	542	.	15.0873	58.5567	54.2083	364	Intron (uc001agd.3/29101, intron 1 of 4)	1	1477053	1510262	33210	2	29101	uc001agd.3	6855	ENSG00000160075	SSU72	SSU72 homolog, RNA polymerase II CTD phosphatase
chr1	1502698	1503407	710	*	CK6___lt__120_BAM_filter_on_data_707_peak_47b	542	.	15.0873	58.5567	54.2083	364	Intron (uc001agd.3/29101, intron 1 of 4)	1	1477053	1510262	33210	2	29101	uc001agd.3	6855	ENSG00000160075	SSU72	SSU72 homolog, RNA polymerase II CTD phosphatase
chr1	1502698	1503407	710	*	CK6___lt__120_BAM_filter_on_data_707_peak_47c	177	.	7.64949	21.1619	17.7896	534	Intron (uc001agd.3/29101, intron 1 of 4)	1	1477053	1510262	33210	2	29101	uc001agd.3	6855	ENSG00000160075	SSU72	SSU72 homolog, RNA polymerase II CTD phosphatase
chr1	1502698	1503407	710	*	CK6___lt__120_BAM_filter_on_data_707_peak_47c	177	.	7.64949	21.1619	17.7896	534	Intron (uc001agd.3/29101, intron 1 of 4)	1	1477053	1510262	33210	2	29101	uc001agd.3	6855	ENSG00000160075	SSU72	SSU72 homolog, RNA polymerase II CTD phosphatase
chr1	1502698	1503407	710	*	CK6___lt__120_BAM_filter_on_data_707_peak_47c	177	.	7.64949	21.1619	17.7896	534	Intron (uc001agd.3/29101, intron 1 of 4)	1	1477053	1510262	33210	2	29101	uc001agd.3	6855	ENSG00000160075	SSU72	SSU72 homolog, RNA polymerase II CTD phosphatase
chr1	1549777	1550139	363	*	CK6___lt__120_BAM_filter_on_data_707_peak_50	143	.	8.7033	17.6352	14.3952	330	Promoter (<=1kb)	1	1550795	1554590	3796	1	142678	uc021oet.1	-656	ENSG00000197530	MIB2	mindbomb E3 ubiquitin protein ligase 2
chr1	1549777	1550139	363	*	CK6___lt__120_BAM_filter_on_data_707_peak_50	143	.	8.7033	17.6352	14.3952	330	Promoter (<=1kb)	1	1550795	1554590	3796	1	142678	uc021oet.1	-656	ENSG00000197530	MIB2	mindbomb E3 ubiquitin protein ligase 2
chr1	1550669	1550932	264	*	CK6___lt__120_BAM_filter_on_data_707_peak_51	294	.	13.6679	33.2331	29.4821	167	Promoter (<=1kb)	1	1550795	1554590	3796	1	142678	uc021oet.1	0	ENSG00000197530	MIB2	mindbomb E3 ubiquitin protein ligase 2
chr1	1590577	1590706	130	*	CK6___lt__120_BAM_filter_on_data_707_peak_53a	95	.	7.93878	12.5925	9.57435	125	Intron (uc001ags.1/984, intron 2 of 15)	1	1577747	1580625	2879	2	984	uc010nyr.1	-9952	ENSG00000248333	CDK11B	cyclin dependent kinase 11B
chr1	1590577	1590706	130	*	CK6___lt__120_BAM_filter_on_data_707_peak_53b	82	.	7.30249	11.237	8.28768	264	Intron (uc001ags.1/984, intron 2 of 15)	1	1577747	1580625	2879	2	984	uc010nyr.1	-9952	ENSG00000248333	CDK11B	cyclin dependent kinase 11B
chr1	1600496	1600689	194	*	CK6___lt__120_BAM_filter_on_data_707_peak_54	138	.	10.1942	17.0823	13.8643	91	Promoter (<=1kb)	1	1592939	1601578	8640	2	728661	uc001ahe.4	889	ENSG00000189339	SLC35E2B	solute carrier family 35 member E2B
chr1	1624735	1625114	380	*	CK6___lt__120_BAM_filter_on_data_707_peak_55	184	.	10.9082	21.8445	18.448	170	Promoter (<=1kb)	1	1601877	1624243	22367	2	728661	uc009vkn.2	-492	ENSG00000189339	SLC35E2B	solute carrier family 35 member E2B
chr1	1677984	1678473	490	*	CK6___lt__120_BAM_filter_on_data_707_peak_58a	125	.	8.96629	15.7289	12.5665	152	Promoter (<=1kb)	1	1658824	1677438	18615	2	9906	uc001aia.2	-546	ENSG00000215790	SLC35E2	solute carrier family 35 member E2
chr1	1785265	1785599	335	*	CK6___lt__120_BAM_filter_on_data_707_peak_59	101	.	8.12214	13.1996	10.1522	433	Intron (uc001aif.3/2782, intron 1 of 11)	1	1716725	1822526	105802	2	2782	uc001aif.3	36927	ENSG00000078369	GNB1	G protein subunit beta 1
chr1	1785265	1785599	335	*	CK6___lt__120_BAM_filter_on_data_707_peak_59	101	.	8.12214	13.1996	10.1522	433	Intron (uc001aif.3/2782, intron 1 of 11)	1	1716725	1822526	105802	2	2782	uc001aif.3	36927	ENSG00000078369	GNB1	G protein subunit beta 1
chr1	2064760	2065016	257	*	CK6___lt__120_BAM_filter_on_data_707_peak_69	104	.	6.17876	13.5388	10.476	162	Intron (uc001aiq.3/5590, intron 4 of 17)	1	2076796	2088167	11372	1	5590	uc009vlb.3	-11780	ENSG00000067606	PRKCZ	protein kinase C zeta
chr1	2066816	2067173	358	*	CK6___lt__120_BAM_filter_on_data_707_peak_70	285	.	10.4449	32.2612	28.5376	193	Intron (uc001aiq.3/5590, intron 5 of 17)	1	2076796	2088167	11372	1	5590	uc009vlb.3	-9623	ENSG00000067606	PRKCZ	protein kinase C zeta
chr1	2121011	2121197	187	*	CK6___lt__120_BAM_filter_on_data_707_peak_73	189	.	12.1284	22.4092	18.9927	79	3' UTR	1	2115899	2126214	10316	2	199990	uc001aiv.2	5017	ENSG00000162585	FAAP20	Fanconi anemia core complex associated protein 20
chr1	2166084	2166303	220	*	CK6___lt__120_BAM_filter_on_data_707_peak_78a	132	.	8.89006	16.4926	13.2981	86	Intron (uc001aja.4/6497, intron 1 of 6)	1	2160134	2241652	81519	1	6497	uc001aja.4	5950	ENSG00000157933	SKI	SKI proto-oncogene
chr1	2188711	2189003	293	*	CK6___lt__120_BAM_filter_on_data_707_peak_80	223	.	12.6493	25.8574	22.3257	168	Intron (uc001aja.4/6497, intron 1 of 6)	1	2160134	2241652	81519	1	6497	uc001aja.4	28577	ENSG00000157933	SKI	SKI proto-oncogene
chr1	2222174	2222358	185	*	CK6___lt__120_BAM_filter_on_data_707_peak_81	90	.	7.76894	12.0915	9.09739	111	Intron (uc001aja.4/6497, intron 1 of 6)	1	2281853	2284100	2248	2	100129534	uc001ajc.3	61742	ENSG00000269896	LOC100129534	small nuclear ribonucleoprotein polypeptide N pseudogene
chr1	2319398	2319858	461	*	CK6___lt__120_BAM_filter_on_data_707_peak_84a	359	.	10.5508	39.9244	35.9941	197	5' UTR	1	2252696	2322993	70298	2	79906	uc001ajb.1	3135	ENSG00000116151	MORN1	MORN repeat containing 1
chr1	2319398	2319858	461	*	CK6___lt__120_BAM_filter_on_data_707_peak_84a	359	.	10.5508	39.9244	35.9941	197	5' UTR	1	2252696	2322993	70298	2	79906	uc001ajb.1	3135	ENSG00000116151	MORN1	MORN repeat containing 1
chr1	2322995	2323231	237	*	CK6___lt__120_BAM_filter_on_data_707_peak_85	459	.	12.2133	50.0822	45.9108	209	Promoter (<=1kb)	1	2323214	2336885	13672	1	11079	uc001aje.2	0	ENSG00000157916	RER1	retention in endoplasmic reticulum sorting receptor 1
chr1	2457642	2457923	282	*	CK6___lt__120_BAM_filter_on_data_707_peak_87	184	.	12.0685	21.8975	18.499	117	Promoter (<=1kb)	1	2439975	2458035	18061	2	55229	uc001ajm.1	112	ENSG00000157881	PANK4	pantothenate kinase 4
chr1	2478381	2478556	176	*	CK6___lt__120_BAM_filter_on_data_707_peak_89	207	.	9.67084	24.1931	20.7153	81	Downstream (2-3kb)	1	2481359	2484284	2926	2	115110	uc001ajo.2	5728	NA	TNFRSF14-AS1	TNFRSF14 antisense RNA 1
chr1	2480198	2480374	177	*	CK6___lt__120_BAM_filter_on_data_707_peak_90	206	.	9.63631	24.128	20.6526	83	Downstream (<1kb)	1	2481359	2484284	2926	2	115110	uc001ajo.2	3910	NA	TNFRSF14-AS1	TNFRSF14 antisense RNA 1
chr1	2487069	2487634	566	*	CK6___lt__120_BAM_filter_on_data_707_peak_91a	368	.	10.8804	40.7585	36.8074	214	Promoter (<=1kb)	1	2487805	2490438	2634	1	8764	uc010nzc.1	-171	ENSG00000157873	TNFRSF14	TNF receptor superfamily member 14
chr1	2487069	2487634	566	*	CK6___lt__120_BAM_filter_on_data_707_peak_91a	368	.	10.8804	40.7585	36.8074	214	Promoter (<=1kb)	1	2487805	2490438	2634	1	8764	uc010nzc.1	-171	ENSG00000157873	TNFRSF14	TNF receptor superfamily member 14
chr1	2487069	2487634	566	*	CK6___lt__120_BAM_filter_on_data_707_peak_91b	301	.	9.62695	33.9624	30.1914	303	Promoter (<=1kb)	1	2487805	2490438	2634	1	8764	uc010nzc.1	-171	ENSG00000157873	TNFRSF14	TNF receptor superfamily member 14
chr1	2487069	2487634	566	*	CK6___lt__120_BAM_filter_on_data_707_peak_91b	301	.	9.62695	33.9624	30.1914	303	Promoter (<=1kb)	1	2487805	2490438	2634	1	8764	uc010nzc.1	-171	ENSG00000157873	TNFRSF14	TNF receptor superfamily member 14
chr1	2517866	2518233	368	*	CK6___lt__120_BAM_filter_on_data_707_peak_93a	450	.	17.7935	49.2101	45.0581	157	Promoter (<=1kb)	1	2517899	2522908	5010	1	127281	uc021oew.1	0	ENSG00000157870	FAM213B	family with sequence similarity 213 member B
chr1	2517866	2518233	368	*	CK6___lt__120_BAM_filter_on_data_707_peak_93b	325	.	14.3122	36.4055	32.5674	274	Promoter (<=1kb)	1	2517899	2522908	5010	1	127281	uc021oew.1	0	ENSG00000157870	FAM213B	family with sequence similarity 213 member B
chr1	3229626	3229966	341	*	CK6___lt__120_BAM_filter_on_data_707_peak_108	236	.	14.095	27.2622	23.6862	172	Intron (uc001akc.3/63976, intron 3 of 16)	1	3371147	3397677	26531	1	27237	uc001akg.4	-141181	ENSG00000130762	ARHGEF16	Rho guanine nucleotide exchange factor 16
chr1	3283145	3283285	141	*	CK6___lt__120_BAM_filter_on_data_707_peak_109	87	.	7.63271	11.7663	8.78994	105	Intron (uc001akc.3/63976, intron 3 of 16)	1	3371147	3397677	26531	1	27237	uc001akg.4	-87862	ENSG00000130762	ARHGEF16	Rho guanine nucleotide exchange factor 16
chr1	3420788	3421023	236	*	CK6___lt__120_BAM_filter_on_data_707_peak_111	551	.	21.867	59.5594	55.1923	95	Intron (uc001akk.3/1953, intron 14 of 29)	1	3404506	3448012	43507	2	1953	uc001akk.3	26989	ENSG00000162591	MEGF6	multiple EGF like domains 6
chr1	3541348	3541557	210	*	CK6___lt__120_BAM_filter_on_data_707_peak_114	497	.	19.6129	54.0017	49.7438	90	Promoter (<=1kb)	1	3541556	3546694	5139	1	127262	uc001akm.3	0	ENSG00000158109	TPRG1L	tumor protein p63 regulated 1 like
chr1	3566616	3566808	193	*	CK6___lt__120_BAM_filter_on_data_707_peak_115	158	.	10.7656	19.19	15.8897	99	Promoter (<=1kb)	1	3547331	3566671	19341	2	49856	uc001ako.3	0	ENSG00000116213	WRAP73	WD repeat containing, antisense to TP73
chr1	3689016	3689250	235	*	CK6___lt__120_BAM_filter_on_data_707_peak_117	160	.	11.0397	19.3231	16.0179	108	Promoter (<=1kb)	1	3689334	3692546	3213	1	388588	uc031pkx.1	-84	ENSG00000235169	SMIM1	small integral membrane protein 1 (Vel blood group)
chr1	3713020	3713209	190	*	CK6___lt__120_BAM_filter_on_data_707_peak_119	159	.	11.1381	19.259	15.956	73	Promoter (<=1kb)	1	3696784	3713068	16285	2	57470	uc001akx.1	0	ENSG00000130764	LRRC47	leucine rich repeat containing 47
chr1	3773758	3773937	180	*	CK6___lt__120_BAM_filter_on_data_707_peak_122	199	.	12.4317	23.3883	19.9376	105	Promoter (<=1kb)	1	3773845	3782564	8720	1	1677	uc009vln.1	0	ENSG00000169598	DFFB	DNA fragmentation factor subunit beta
chr1	3780153	3780496	344	*	CK6___lt__120_BAM_filter_on_data_707_peak_123	188	.	11.4645	22.2396	18.8287	191	Intron (uc009vln.1/1677, intron 2 of 2)	1	3773845	3801993	28149	1	1677	uc010nzn.2	6308	ENSG00000169598	DFFB	DNA fragmentation factor subunit beta
chr1	3816756	3817524	769	*	CK6___lt__120_BAM_filter_on_data_707_peak_125a	98	.	6.28111	12.9108	9.87797	100	Promoter (<=1kb)	1	3816968	3832011	15044	1	100133612	uc001alg.3	0	ENSG00000236423	LINC01134	long intergenic non-protein coding RNA 1134
chr1	3816756	3817524	769	*	CK6___lt__120_BAM_filter_on_data_707_peak_125a	98	.	6.28111	12.9108	9.87797	100	Promoter (<=1kb)	1	3816968	3832011	15044	1	100133612	uc001alg.3	0	ENSG00000236423	LINC01134	long intergenic non-protein coding RNA 1134
chr1	3816756	3817524	769	*	CK6___lt__120_BAM_filter_on_data_707_peak_125b	98	.	6.28111	12.9108	9.87797	283	Promoter (<=1kb)	1	3816968	3832011	15044	1	100133612	uc001alg.3	0	ENSG00000236423	LINC01134	long intergenic non-protein coding RNA 1134
chr1	3816756	3817524	769	*	CK6___lt__120_BAM_filter_on_data_707_peak_125b	98	.	6.28111	12.9108	9.87797	283	Promoter (<=1kb)	1	3816968	3832011	15044	1	100133612	uc001alg.3	0	ENSG00000236423	LINC01134	long intergenic non-protein coding RNA 1134
chr1	3816756	3817524	769	*	CK6___lt__120_BAM_filter_on_data_707_peak_125c	189	.	9.00395	22.3714	18.9562	664	Promoter (<=1kb)	1	3816968	3832011	15044	1	100133612	uc001alg.3	0	ENSG00000236423	LINC01134	long intergenic non-protein coding RNA 1134
chr1	3816756	3817524	769	*	CK6___lt__120_BAM_filter_on_data_707_peak_125c	189	.	9.00395	22.3714	18.9562	664	Promoter (<=1kb)	1	3816968	3832011	15044	1	100133612	uc001alg.3	0	ENSG00000236423	LINC01134	long intergenic non-protein coding RNA 1134
chr1	3817904	3818073	170	*	CK6___lt__120_BAM_filter_on_data_707_peak_126	190	.	9.06647	22.4907	19.0711	116	Promoter (<=1kb)	1	3816968	3833879	16912	1	100133612	uc001alh.4	936	ENSG00000236423	LINC01134	long intergenic non-protein coding RNA 1134
chr1	4472047	4472168	122	*	CK6___lt__120_BAM_filter_on_data_707_peak_137	174	.	11.6891	20.8468	17.4862	74	Promoter (<=1kb)	1	4472111	4484744	12634	1	284661	uc001alj.2	0	ENSG00000235054	LINC01777	long intergenic non-protein coding RNA 1777
chr1	4482423	4482855	433	*	CK6___lt__120_BAM_filter_on_data_707_peak_138	415	.	17.4897	45.5861	41.5168	172	Exon (uc001alj.2/284661, exon 4 of 6)	1	4472111	4484744	12634	1	284661	uc001alj.2	10312	ENSG00000235054	LINC01777	long intergenic non-protein coding RNA 1777
chr1	5975898	5976257	360	*	CK6___lt__120_BAM_filter_on_data_707_peak_167	332	.	7.90203	37.1414	33.2837	155	Intron (uc001alq.2/261734, intron 11 of 29)	1	5946555	5965543	18989	2	261734	uc009vlu.2	-10355	ENSG00000131697	NPHP4	nephrocystin 4
chr1	5977507	5978003	497	*	CK6___lt__120_BAM_filter_on_data_707_peak_168a	1208	.	17.5981	126.203	120.863	255	Intron (uc001alq.2/261734, intron 11 of 29)	1	5946555	5965543	18989	2	261734	uc009vlu.2	-11964	ENSG00000131697	NPHP4	nephrocystin 4
chr1	5977507	5978003	497	*	CK6___lt__120_BAM_filter_on_data_707_peak_168b	296	.	7.41099	33.3936	29.6381	422	Intron (uc001alq.2/261734, intron 11 of 29)	1	5946555	5965543	18989	2	261734	uc009vlu.2	-11964	ENSG00000131697	NPHP4	nephrocystin 4
chr1	5988995	5989441	447	*	CK6___lt__120_BAM_filter_on_data_707_peak_169	608	.	17.057	65.36	60.8879	329	Intron (uc001alq.2/261734, intron 10 of 29)	1	5946555	5965543	18989	2	261734	uc009vlu.2	-23452	ENSG00000131697	NPHP4	nephrocystin 4
chr1	6052511	6052779	269	*	CK6___lt__120_BAM_filter_on_data_707_peak_175	975	.	30.9713	102.564	97.5102	103	Promoter (<=1kb)	1	5922870	6052533	129664	2	261734	uc001alq.2	0	ENSG00000131697	NPHP4	nephrocystin 4
chr1	6076407	6076784	378	*	CK6___lt__120_BAM_filter_on_data_707_peak_177	1009	.	23.8166	106.013	100.912	140	Intron (uc009vlv.2/8514, intron 1 of 15)	1	6086073	6158621	72549	1	8514	uc001alu.3	-9289	ENSG00000069424	KCNAB2	potassium voltage-gated channel subfamily A regulatory beta subunit 2
chr1	6086212	6086454	243	*	CK6___lt__120_BAM_filter_on_data_707_peak_178	669	.	14.5508	71.5507	66.9697	128	Promoter (<=1kb)	1	6086073	6161253	75181	1	8514	uc001alw.2	139	ENSG00000069424	KCNAB2	potassium voltage-gated channel subfamily A regulatory beta subunit 2
chr1	6088794	6089055	262	*	CK6___lt__120_BAM_filter_on_data_707_peak_179	162	.	6.22354	19.5414	16.2283	167	Promoter (2-3kb)	1	6086073	6161253	75181	1	8514	uc001alw.2	2721	ENSG00000069424	KCNAB2	potassium voltage-gated channel subfamily A regulatory beta subunit 2
chr1	6123765	6124035	271	*	CK6___lt__120_BAM_filter_on_data_707_peak_182a	144	.	9.91419	17.7351	14.4911	146	Intron (uc009vlv.2/8514, intron 3 of 15)	1	6105981	6161253	55273	1	8514	uc009vlw.2	17784	ENSG00000069424	KCNAB2	potassium voltage-gated channel subfamily A regulatory beta subunit 2
chr1	6259589	6259836	248	*	CK6___lt__120_BAM_filter_on_data_707_peak_187	727	.	26.0674	77.4448	72.7659	119	Promoter (<=1kb)	1	6245080	6259679	14600	2	6146	uc001amd.3	0	ENSG00000116251	RPL22	ribosomal protein L22
chr1	6296072	6296213	142	*	CK6___lt__120_BAM_filter_on_data_707_peak_189	112	.	8.76465	14.3153	11.216	142	Promoter (<=1kb)	1	6281253	6296044	14792	2	23463	uc001aml.3	-28	ENSG00000116237	ICMT	isoprenylcysteine carboxyl methyltransferase
chr1	6333446	6333964	519	*	CK6___lt__120_BAM_filter_on_data_707_peak_194a	147	.	8.94725	18.0477	14.7914	180	Intron (uc001amq.3/11332, intron 8 of 8)	1	6307406	6321035	13630	2	387509	uc001amp.2	-12411	ENSG00000158292	GPR153	G protein-coupled receptor 153
chr1	6372167	6372576	410	*	CK6___lt__120_BAM_filter_on_data_707_peak_197	411	.	13.7007	45.1668	41.1072	215	Intron (uc001amq.3/11332, intron 6 of 8)	1	6324332	6419004	94673	2	11332	uc001amq.3	46428	ENSG00000097021	ACOT7	acyl-CoA thioesterase 7
chr1	6373492	6373742	251	*	CK6___lt__120_BAM_filter_on_data_707_peak_198	201	.	8.82433	23.6481	20.1887	172	Intron (uc001amq.3/11332, intron 6 of 8)	1	6324332	6419004	94673	2	11332	uc001amq.3	45262	ENSG00000097021	ACOT7	acyl-CoA thioesterase 7
chr1	6381299	6382064	766	*	CK6___lt__120_BAM_filter_on_data_707_peak_200a	122	.	5.72659	15.384	12.2365	75	Intron (uc001amq.3/11332, intron 5 of 8)	1	6324332	6419004	94673	2	11332	uc001amq.3	36940	ENSG00000097021	ACOT7	acyl-CoA thioesterase 7
chr1	6381299	6382064	766	*	CK6___lt__120_BAM_filter_on_data_707_peak_200a	122	.	5.72659	15.384	12.2365	75	Intron (uc001amq.3/11332, intron 5 of 8)	1	6324332	6419004	94673	2	11332	uc001amq.3	36940	ENSG00000097021	ACOT7	acyl-CoA thioesterase 7
chr1	6381299	6382064	766	*	CK6___lt__120_BAM_filter_on_data_707_peak_200a	122	.	5.72659	15.384	12.2365	75	Intron (uc001amq.3/11332, intron 5 of 8)	1	6324332	6419004	94673	2	11332	uc001amq.3	36940	ENSG00000097021	ACOT7	acyl-CoA thioesterase 7
chr1	6381299	6382064	766	*	CK6___lt__120_BAM_filter_on_data_707_peak_200a	122	.	5.72659	15.384	12.2365	75	Intron (uc001amq.3/11332, intron 5 of 8)	1	6324332	6419004	94673	2	11332	uc001amq.3	36940	ENSG00000097021	ACOT7	acyl-CoA thioesterase 7
chr1	6381299	6382064	766	*	CK6___lt__120_BAM_filter_on_data_707_peak_200b	165	.	6.68102	19.8477	16.5232	192	Intron (uc001amq.3/11332, intron 5 of 8)	1	6324332	6419004	94673	2	11332	uc001amq.3	36940	ENSG00000097021	ACOT7	acyl-CoA thioesterase 7
chr1	6381299	6382064	766	*	CK6___lt__120_BAM_filter_on_data_707_peak_200b	165	.	6.68102	19.8477	16.5232	192	Intron (uc001amq.3/11332, intron 5 of 8)	1	6324332	6419004	94673	2	11332	uc001amq.3	36940	ENSG00000097021	ACOT7	acyl-CoA thioesterase 7
chr1	6381299	6382064	766	*	CK6___lt__120_BAM_filter_on_data_707_peak_200b	165	.	6.68102	19.8477	16.5232	192	Intron (uc001amq.3/11332, intron 5 of 8)	1	6324332	6419004	94673	2	11332	uc001amq.3	36940	ENSG00000097021	ACOT7	acyl-CoA thioesterase 7
chr1	6381299	6382064	766	*	CK6___lt__120_BAM_filter_on_data_707_peak_200b	165	.	6.68102	19.8477	16.5232	192	Intron (uc001amq.3/11332, intron 5 of 8)	1	6324332	6419004	94673	2	11332	uc001amq.3	36940	ENSG00000097021	ACOT7	acyl-CoA thioesterase 7
chr1	6381299	6382064	766	*	CK6___lt__120_BAM_filter_on_data_707_peak_200c	962	.	19.6829	101.272	96.2345	624	Intron (uc001amq.3/11332, intron 5 of 8)	1	6324332	6419004	94673	2	11332	uc001amq.3	36940	ENSG00000097021	ACOT7	acyl-CoA thioesterase 7
chr1	6381299	6382064	766	*	CK6___lt__120_BAM_filter_on_data_707_peak_200c	962	.	19.6829	101.272	96.2345	624	Intron (uc001amq.3/11332, intron 5 of 8)	1	6324332	6419004	94673	2	11332	uc001amq.3	36940	ENSG00000097021	ACOT7	acyl-CoA thioesterase 7
chr1	6381299	6382064	766	*	CK6___lt__120_BAM_filter_on_data_707_peak_200c	962	.	19.6829	101.272	96.2345	624	Intron (uc001amq.3/11332, intron 5 of 8)	1	6324332	6419004	94673	2	11332	uc001amq.3	36940	ENSG00000097021	ACOT7	acyl-CoA thioesterase 7
chr1	6381299	6382064	766	*	CK6___lt__120_BAM_filter_on_data_707_peak_200c	962	.	19.6829	101.272	96.2345	624	Intron (uc001amq.3/11332, intron 5 of 8)	1	6324332	6419004	94673	2	11332	uc001amq.3	36940	ENSG00000097021	ACOT7	acyl-CoA thioesterase 7
chr1	6402135	6402574	440	*	CK6___lt__120_BAM_filter_on_data_707_peak_201	699	.	15.6401	74.5884	69.9568	282	Intron (uc001amq.3/11332, intron 2 of 8)	1	6324332	6419004	94673	2	11332	uc001amq.3	16430	ENSG00000097021	ACOT7	acyl-CoA thioesterase 7
chr1	6403651	6403872	222	*	CK6___lt__120_BAM_filter_on_data_707_peak_202	201	.	7.26129	23.6574	20.1977	135	Intron (uc001amq.3/11332, intron 2 of 8)	1	6324332	6419004	94673	2	11332	uc001amq.3	15132	ENSG00000097021	ACOT7	acyl-CoA thioesterase 7
chr1	6408690	6408934	245	*	CK6___lt__120_BAM_filter_on_data_707_peak_203	146	.	9.13824	17.8667	14.6173	104	Intron (uc001amq.3/11332, intron 2 of 8)	1	6324332	6419004	94673	2	11332	uc001amq.3	10070	ENSG00000097021	ACOT7	acyl-CoA thioesterase 7
chr1	6419779	6420009	231	*	CK6___lt__120_BAM_filter_on_data_707_peak_204	436	.	17.4067	47.7471	43.6284	173	Promoter (<=1kb)	1	6324332	6420764	96433	2	11332	uc001amr.3	755	ENSG00000097021	ACOT7	acyl-CoA thioesterase 7
chr1	6427862	6428079	218	*	CK6___lt__120_BAM_filter_on_data_707_peak_206	109	.	7.93295	14.0325	10.9468	168	Intron (uc001ams.3/11332, intron 1 of 8)	1	6324332	6420764	96433	2	11332	uc001amr.3	-7098	ENSG00000097021	ACOT7	acyl-CoA thioesterase 7
chr1	6445841	6446063	223	*	CK6___lt__120_BAM_filter_on_data_707_peak_207a	170	.	10.6563	20.382	17.0378	72	Promoter (<=1kb)	1	6324332	6445883	121552	2	11332	uc001ams.3	0	ENSG00000097021	ACOT7	acyl-CoA thioesterase 7
chr1	6445841	6446063	223	*	CK6___lt__120_BAM_filter_on_data_707_peak_207b	223	.	12.6861	25.9191	22.3858	190	Promoter (<=1kb)	1	6324332	6445883	121552	2	11332	uc001ams.3	0	ENSG00000097021	ACOT7	acyl-CoA thioesterase 7
chr1	6453461	6453610	150	*	CK6___lt__120_BAM_filter_on_data_707_peak_208	467	.	16.222	50.9835	46.7903	79	Promoter (<=1kb)	1	6324332	6453826	129495	2	11332	uc001amt.3	216	ENSG00000097021	ACOT7	acyl-CoA thioesterase 7
chr1	6453802	6454130	329	*	CK6___lt__120_BAM_filter_on_data_707_peak_209	197	.	9.42644	23.171	19.7279	228	Promoter (<=1kb)	1	6324332	6453826	129495	2	11332	uc001amt.3	0	ENSG00000097021	ACOT7	acyl-CoA thioesterase 7
chr1	6453802	6454130	329	*	CK6___lt__120_BAM_filter_on_data_707_peak_209	197	.	9.42644	23.171	19.7279	228	Promoter (<=1kb)	1	6324332	6453826	129495	2	11332	uc001amt.3	0	ENSG00000097021	ACOT7	acyl-CoA thioesterase 7
chr1	6575811	6576233	423	*	CK6___lt__120_BAM_filter_on_data_707_peak_212a	87	.	6.53232	11.7254	8.75183	93	Intron (uc001anp.2/57449, intron 1 of 21)	1	6526152	6580121	53970	2	57449	uc001anp.2	3888	ENSG00000171680	PLEKHG5	pleckstrin homology and RhoGEF domain containing G5
chr1	6575811	6576233	423	*	CK6___lt__120_BAM_filter_on_data_707_peak_212a	87	.	6.53232	11.7254	8.75183	93	Intron (uc001anp.2/57449, intron 1 of 21)	1	6526152	6580121	53970	2	57449	uc001anp.2	3888	ENSG00000171680	PLEKHG5	pleckstrin homology and RhoGEF domain containing G5
chr1	6575811	6576233	423	*	CK6___lt__120_BAM_filter_on_data_707_peak_212b	674	.	23.4914	71.991	67.4024	247	Intron (uc001anp.2/57449, intron 1 of 21)	1	6526152	6580121	53970	2	57449	uc001anp.2	3888	ENSG00000171680	PLEKHG5	pleckstrin homology and RhoGEF domain containing G5
chr1	6575811	6576233	423	*	CK6___lt__120_BAM_filter_on_data_707_peak_212b	674	.	23.4914	71.991	67.4024	247	Intron (uc001anp.2/57449, intron 1 of 21)	1	6526152	6580121	53970	2	57449	uc001anp.2	3888	ENSG00000171680	PLEKHG5	pleckstrin homology and RhoGEF domain containing G5
chr1	6585748	6585897	150	*	CK6___lt__120_BAM_filter_on_data_707_peak_214	182	.	11.0991	21.6305	18.2415	92	3' UTR	1	6526152	6580121	53970	2	57449	uc001anq.2	-5627	ENSG00000171680	PLEKHG5	pleckstrin homology and RhoGEF domain containing G5
chr1	6639872	6640093	222	*	CK6___lt__120_BAM_filter_on_data_707_peak_216	255	.	13.9036	29.1326	25.5001	105	Promoter (<=1kb)	1	6640056	6649340	9285	1	3104	uc009vmc.2	0	ENSG00000204859	ZBTB48	zinc finger and BTB domain containing 48
chr1	6661373	6661586	214	*	CK6___lt__120_BAM_filter_on_data_707_peak_217b	322	.	8.03513	36.0373	32.2093	240	Promoter (1-2kb)	1	6650779	6662929	12151	2	9903	uc001anz.1	1343	ENSG00000162413	KLHL21	kelch like family member 21
chr1	6662892	6663147	256	*	CK6___lt__120_BAM_filter_on_data_707_peak_218	340	.	8.28386	37.9309	34.053	124	Promoter (<=1kb)	1	6650779	6662929	12151	2	9903	uc001anz.1	0	ENSG00000162413	KLHL21	kelch like family member 21
chr1	6663316	6663613	298	*	CK6___lt__120_BAM_filter_on_data_707_peak_219a	524	.	10.7135	56.77	52.4567	74	Promoter (<=1kb)	1	6650784	6662929	12146	2	9903	uc001aoa.3	-387	ENSG00000162413	KLHL21	kelch like family member 21
chr1	6663316	6663613	298	*	CK6___lt__120_BAM_filter_on_data_707_peak_219a	524	.	10.7135	56.77	52.4567	74	Promoter (<=1kb)	1	6650784	6662929	12146	2	9903	uc001aoa.3	-387	ENSG00000162413	KLHL21	kelch like family member 21
chr1	6663316	6663613	298	*	CK6___lt__120_BAM_filter_on_data_707_peak_219b	503	.	10.4618	54.645	50.3745	212	Promoter (<=1kb)	1	6650784	6662929	12146	2	9903	uc001aoa.3	-387	ENSG00000162413	KLHL21	kelch like family member 21
chr1	6663316	6663613	298	*	CK6___lt__120_BAM_filter_on_data_707_peak_219b	503	.	10.4618	54.645	50.3745	212	Promoter (<=1kb)	1	6650784	6662929	12146	2	9903	uc001aoa.3	-387	ENSG00000162413	KLHL21	kelch like family member 21
chr1	6673505	6673823	319	*	CK6___lt__120_BAM_filter_on_data_707_peak_220	539	.	19.2619	58.3023	53.9588	204	Promoter (<=1kb)	1	6673756	6684093	10338	1	148479	uc001aob.4	0	ENSG00000116273	PHF13	PHD finger protein 13
chr1	6713164	6713461	298	*	CK6___lt__120_BAM_filter_on_data_707_peak_222b	461	.	15.48	50.2856	46.109	283	Intron (uc001aof.2/55735, intron 5 of 15)	1	6685210	6695646	10437	1	90326	uc001aoe.2	27954	ENSG00000041988	THAP3	THAP domain containing 3
chr1	6714067	6714379	313	*	CK6___lt__120_BAM_filter_on_data_707_peak_223	95	.	6.08258	12.5407	9.52519	108	Exon (uc001aof.2/55735, exon 5 of 16)	1	6685210	6695646	10437	1	90326	uc001aoe.2	28857	ENSG00000041988	THAP3	THAP domain containing 3
chr1	6714067	6714379	313	*	CK6___lt__120_BAM_filter_on_data_707_peak_223	95	.	6.08258	12.5407	9.52519	108	Exon (uc001aof.2/55735, exon 5 of 16)	1	6685210	6695646	10437	1	90326	uc001aoe.2	28857	ENSG00000041988	THAP3	THAP domain containing 3
chr1	6761847	6762054	208	*	CK6___lt__120_BAM_filter_on_data_707_peak_225	300	.	16.2986	33.8146	30.048	128	Promoter (<=1kb)	1	6694228	6761966	67739	2	55735	uc001aof.2	0	ENSG00000007923	DNAJC11	DnaJ heat shock protein family (Hsp40) member C11
chr1	6844630	6844844	215	*	CK6___lt__120_BAM_filter_on_data_707_peak_229	294	.	8.679	33.1733	29.4242	133	Promoter (<=1kb)	1	6845384	6932107	86724	1	23261	uc001aoh.3	-540	ENSG00000171735	CAMTA1	calmodulin binding transcription activator 1
chr1	6845057	6845473	417	*	CK6___lt__120_BAM_filter_on_data_707_peak_230	1128	.	20.3219	118.061	112.809	158	Promoter (<=1kb)	1	6845384	6932107	86724	1	23261	uc001aoh.3	0	ENSG00000171735	CAMTA1	calmodulin binding transcription activator 1
chr1	6908992	6909162	171	*	CK6___lt__120_BAM_filter_on_data_707_peak_232	110	.	8.81159	14.123	11.0322	87	Intron (uc001aoh.3/23261, intron 3 of 3)	1	6845384	7829766	984383	1	23261	uc001aoi.3	63608	ENSG00000171735	CAMTA1	calmodulin binding transcription activator 1
chr1	6929134	6929520	387	*	CK6___lt__120_BAM_filter_on_data_707_peak_234	287	.	12.4832	32.4641	28.7348	379	Intron (uc001aoh.3/23261, intron 3 of 3)	1	6845384	7829766	984383	1	23261	uc001aoi.3	83750	ENSG00000171735	CAMTA1	calmodulin binding transcription activator 1
chr1	6929134	6929520	387	*	CK6___lt__120_BAM_filter_on_data_707_peak_234	287	.	12.4832	32.4641	28.7348	379	Intron (uc001aoh.3/23261, intron 3 of 3)	1	6845384	7829766	984383	1	23261	uc001aoi.3	83750	ENSG00000171735	CAMTA1	calmodulin binding transcription activator 1
chr1	7096982	7097227	246	*	CK6___lt__120_BAM_filter_on_data_707_peak_239	83	.	7.44898	11.3298	8.37561	201	Intron (uc001aoi.3/23261, intron 3 of 22)	1	6845384	7829766	984383	1	23261	uc001aoi.3	251598	ENSG00000171735	CAMTA1	calmodulin binding transcription activator 1
chr1	7146239	7146442	204	*	CK6___lt__120_BAM_filter_on_data_707_peak_241	93	.	7.91078	12.3262	9.3206	190	Intron (uc001aoi.3/23261, intron 3 of 22)	1	6845384	7829766	984383	1	23261	uc001aoi.3	300855	ENSG00000171735	CAMTA1	calmodulin binding transcription activator 1
chr1	7153468	7153877	410	*	CK6___lt__120_BAM_filter_on_data_707_peak_242	181	.	11.6418	21.5611	18.1746	136	Intron (uc001aoi.3/23261, intron 4 of 22)	1	6845384	7829766	984383	1	23261	uc001aoi.3	308084	ENSG00000171735	CAMTA1	calmodulin binding transcription activator 1
chr1	7177723	7178273	551	*	CK6___lt__120_BAM_filter_on_data_707_peak_244a	319	.	12.4993	35.8138	31.9917	181	Intron (uc001aoi.3/23261, intron 4 of 22)	1	6845384	7829766	984383	1	23261	uc001aoi.3	332339	ENSG00000171735	CAMTA1	calmodulin binding transcription activator 1
chr1	7177723	7178273	551	*	CK6___lt__120_BAM_filter_on_data_707_peak_244a	319	.	12.4993	35.8138	31.9917	181	Intron (uc001aoi.3/23261, intron 4 of 22)	1	6845384	7829766	984383	1	23261	uc001aoi.3	332339	ENSG00000171735	CAMTA1	calmodulin binding transcription activator 1
chr1	7177723	7178273	551	*	CK6___lt__120_BAM_filter_on_data_707_peak_244b	356	.	13.3905	39.596	35.6735	408	Intron (uc001aoi.3/23261, intron 4 of 22)	1	6845384	7829766	984383	1	23261	uc001aoi.3	332339	ENSG00000171735	CAMTA1	calmodulin binding transcription activator 1
chr1	7177723	7178273	551	*	CK6___lt__120_BAM_filter_on_data_707_peak_244b	356	.	13.3905	39.596	35.6735	408	Intron (uc001aoi.3/23261, intron 4 of 22)	1	6845384	7829766	984383	1	23261	uc001aoi.3	332339	ENSG00000171735	CAMTA1	calmodulin binding transcription activator 1
chr1	7263680	7263927	248	*	CK6___lt__120_BAM_filter_on_data_707_peak_245	166	.	11.1884	19.9359	16.6079	86	Intron (uc001aoi.3/23261, intron 4 of 22)	1	6845384	7829766	984383	1	23261	uc001aoi.3	418296	ENSG00000171735	CAMTA1	calmodulin binding transcription activator 1
chr1	7373158	7373507	350	*	CK6___lt__120_BAM_filter_on_data_707_peak_248	206	.	12.8693	24.1581	20.6811	154	Intron (uc001aoi.3/23261, intron 5 of 22)	1	7732054	7805082	73029	1	23261	uc010nzv.1	-358547	ENSG00000171735	CAMTA1	calmodulin binding transcription activator 1
chr1	7451577	7451774	198	*	CK6___lt__120_BAM_filter_on_data_707_peak_249	165	.	11.3357	19.878	16.5524	156	Intron (uc001aoi.3/23261, intron 5 of 22)	1	7732054	7805082	73029	1	23261	uc010nzv.1	-280280	ENSG00000171735	CAMTA1	calmodulin binding transcription activator 1
chr1	7609898	7610139	242	*	CK6___lt__120_BAM_filter_on_data_707_peak_253	81	.	7.02687	11.0536	8.1141	58	Intron (uc001aoi.3/23261, intron 6 of 22)	1	7732054	7805082	73029	1	23261	uc010nzv.1	-121915	ENSG00000171735	CAMTA1	calmodulin binding transcription activator 1
chr1	7635013	7635713	701	*	CK6___lt__120_BAM_filter_on_data_707_peak_254a	917	.	15.2433	96.6843	91.71	82	Intron (uc001aoi.3/23261, intron 6 of 22)	1	7732054	7805082	73029	1	23261	uc010nzv.1	-96341	ENSG00000171735	CAMTA1	calmodulin binding transcription activator 1
chr1	7635013	7635713	701	*	CK6___lt__120_BAM_filter_on_data_707_peak_254a	917	.	15.2433	96.6843	91.71	82	Intron (uc001aoi.3/23261, intron 6 of 22)	1	7732054	7805082	73029	1	23261	uc010nzv.1	-96341	ENSG00000171735	CAMTA1	calmodulin binding transcription activator 1
chr1	7635013	7635713	701	*	CK6___lt__120_BAM_filter_on_data_707_peak_254a	917	.	15.2433	96.6843	91.71	82	Intron (uc001aoi.3/23261, intron 6 of 22)	1	7732054	7805082	73029	1	23261	uc010nzv.1	-96341	ENSG00000171735	CAMTA1	calmodulin binding transcription activator 1
chr1	7635013	7635713	701	*	CK6___lt__120_BAM_filter_on_data_707_peak_254b	1105	.	17.249	115.806	110.578	322	Intron (uc001aoi.3/23261, intron 6 of 22)	1	7732054	7805082	73029	1	23261	uc010nzv.1	-96341	ENSG00000171735	CAMTA1	calmodulin binding transcription activator 1
chr1	7635013	7635713	701	*	CK6___lt__120_BAM_filter_on_data_707_peak_254b	1105	.	17.249	115.806	110.578	322	Intron (uc001aoi.3/23261, intron 6 of 22)	1	7732054	7805082	73029	1	23261	uc010nzv.1	-96341	ENSG00000171735	CAMTA1	calmodulin binding transcription activator 1
chr1	7635013	7635713	701	*	CK6___lt__120_BAM_filter_on_data_707_peak_254b	1105	.	17.249	115.806	110.578	322	Intron (uc001aoi.3/23261, intron 6 of 22)	1	7732054	7805082	73029	1	23261	uc010nzv.1	-96341	ENSG00000171735	CAMTA1	calmodulin binding transcription activator 1
chr1	7635013	7635713	701	*	CK6___lt__120_BAM_filter_on_data_707_peak_254c	149	.	5.34853	18.1915	14.9293	645	Intron (uc001aoi.3/23261, intron 6 of 22)	1	7732054	7805082	73029	1	23261	uc010nzv.1	-96341	ENSG00000171735	CAMTA1	calmodulin binding transcription activator 1
chr1	7635013	7635713	701	*	CK6___lt__120_BAM_filter_on_data_707_peak_254c	149	.	5.34853	18.1915	14.9293	645	Intron (uc001aoi.3/23261, intron 6 of 22)	1	7732054	7805082	73029	1	23261	uc010nzv.1	-96341	ENSG00000171735	CAMTA1	calmodulin binding transcription activator 1
chr1	7635013	7635713	701	*	CK6___lt__120_BAM_filter_on_data_707_peak_254c	149	.	5.34853	18.1915	14.9293	645	Intron (uc001aoi.3/23261, intron 6 of 22)	1	7732054	7805082	73029	1	23261	uc010nzv.1	-96341	ENSG00000171735	CAMTA1	calmodulin binding transcription activator 1
chr1	7814533	7814643	111	*	CK6___lt__120_BAM_filter_on_data_707_peak_256	173	.	11.4029	20.7107	17.3542	105	Intron (uc001aoi.3/23261, intron 21 of 22)	1	7804895	7829766	24872	1	23261	uc009vmf.3	9638	ENSG00000171735	CAMTA1	calmodulin binding transcription activator 1
chr1	7843899	7844375	477	*	CK6___lt__120_BAM_filter_on_data_707_peak_259	901	.	19.9978	95.0869	90.1324	198	Promoter (<=1kb)	1	7844380	7864018	19639	1	8863	uc001aon.3	-5	ENSG00000049246	PER3	period circadian regulator 3
chr1	7871679	7872072	394	*	CK6___lt__120_BAM_filter_on_data_707_peak_261b	830	.	20.2861	87.8753	83.0245	238	Intron (uc009vmg.1/8863, intron 13 of 18)	1	7844714	7905237	60524	1	8863	uc010nzw.2	26965	ENSG00000049246	PER3	period circadian regulator 3
chr1	7933922	7934164	243	*	CK6___lt__120_BAM_filter_on_data_707_peak_263	417	.	18.5169	45.8219	41.7475	103	Intron (uc001aoq.3/10911, intron 1 of 7)	1	7907672	7913565	5894	2	10911	uc001aos.3	-20357	ENSG00000049247	UTS2	urotensin 2
chr1	7976474	7976608	135	*	CK6___lt__120_BAM_filter_on_data_707_peak_265	93	.	7.87435	12.3535	9.34699	53	3' UTR	1	7903143	7973294	70152	2	10911	uc001aoq.3	-3180	ENSG00000049247	UTS2	urotensin 2
chr1	8021468	8021705	238	*	CK6___lt__120_BAM_filter_on_data_707_peak_267	188	.	11.1824	22.3	18.8869	118	Promoter (<=1kb)	1	8021714	8045342	23629	1	11315	uc001aou.4	-9	ENSG00000116288	PARK7	Parkinsonism associated deglycase
chr1	8078095	8078216	122	*	CK6___lt__120_BAM_filter_on_data_707_peak_272a	98	.	7.72424	12.889	9.8569	96	Promoter (2-3kb)	1	8073487	8075752	2266	2	54206	uc001apa.1	-2343	ENSG00000116285	ERRFI1	ERBB receptor feedback inhibitor 1
chr1	8472371	8472480	110	*	CK6___lt__120_BAM_filter_on_data_707_peak_288	150	.	10.2381	18.2824	15.0163	63	Intron (uc001apd.3/473, intron 2 of 12)	1	8412464	8483747	71284	2	473	uc001apd.3	11267	ENSG00000142599	RERE	arginine-glutamic acid dipeptide repeats
chr1	8487685	8488002	318	*	CK6___lt__120_BAM_filter_on_data_707_peak_289	98	.	8.08049	12.8411	9.81065	227	Intron (uc001ape.3/473, intron 12 of 23)	1	8412464	8483747	71284	2	473	uc001apd.3	-3938	ENSG00000142599	RERE	arginine-glutamic acid dipeptide repeats
chr1	8499087	8499446	360	*	CK6___lt__120_BAM_filter_on_data_707_peak_290	434	.	17.7289	47.5385	43.4247	243	Intron (uc001ape.3/473, intron 12 of 23)	1	8412464	8483747	71284	2	473	uc001apd.3	-15340	ENSG00000142599	RERE	arginine-glutamic acid dipeptide repeats
chr1	8521666	8521819	154	*	CK6___lt__120_BAM_filter_on_data_707_peak_291	297	.	14.218	33.5053	29.7467	73	Intron (uc001ape.3/473, intron 12 of 23)	1	8412464	8483747	71284	2	473	uc001apd.3	-37919	ENSG00000142599	RERE	arginine-glutamic acid dipeptide repeats
chr1	8521666	8521819	154	*	CK6___lt__120_BAM_filter_on_data_707_peak_291	297	.	14.218	33.5053	29.7467	73	Intron (uc001ape.3/473, intron 12 of 23)	1	8412464	8483747	71284	2	473	uc001apd.3	-37919	ENSG00000142599	RERE	arginine-glutamic acid dipeptide repeats
chr1	8523196	8523417	222	*	CK6___lt__120_BAM_filter_on_data_707_peak_292	146	.	9.13824	17.8667	14.6173	81	Intron (uc001ape.3/473, intron 12 of 23)	1	8412464	8483747	71284	2	473	uc001apd.3	-39449	ENSG00000142599	RERE	arginine-glutamic acid dipeptide repeats
chr1	8580767	8580937	171	*	CK6___lt__120_BAM_filter_on_data_707_peak_294	120	.	9.09632	15.1966	12.058	57	Intron (uc001ape.3/473, intron 8 of 23)	1	8420172	8585844	165673	2	473	uc010nzx.1	4907	ENSG00000142599	RERE	arginine-glutamic acid dipeptide repeats
chr1	8681116	8681400	285	*	CK6___lt__120_BAM_filter_on_data_707_peak_300	158	.	10.465	19.1034	15.8059	120	Intron (uc001ape.3/473, intron 4 of 23)	1	8420172	8585844	165673	2	473	uc010nzx.1	-95272	ENSG00000142599	RERE	arginine-glutamic acid dipeptide repeats
chr1	8681116	8681400	285	*	CK6___lt__120_BAM_filter_on_data_707_peak_300	158	.	10.465	19.1034	15.8059	120	Intron (uc001ape.3/473, intron 4 of 23)	1	8420172	8585844	165673	2	473	uc010nzx.1	-95272	ENSG00000142599	RERE	arginine-glutamic acid dipeptide repeats
chr1	8686681	8686795	115	*	CK6___lt__120_BAM_filter_on_data_707_peak_301	120	.	9.3103	15.1796	12.0416	64	Intron (uc001ape.3/473, intron 3 of 23)	1	8420172	8585844	165673	2	473	uc010nzx.1	-100837	ENSG00000142599	RERE	arginine-glutamic acid dipeptide repeats
chr1	8763491	8763872	382	*	CK6___lt__120_BAM_filter_on_data_707_peak_306a	118	.	7.42984	14.9703	11.8415	113	Intron (uc001ape.3/473, intron 2 of 23)	1	8525030	8813897	288868	2	473	uc001aph.1	50025	ENSG00000142599	RERE	arginine-glutamic acid dipeptide repeats
chr1	8763491	8763872	382	*	CK6___lt__120_BAM_filter_on_data_707_peak_306b	108	.	7.07604	13.9079	10.8269	249	Intron (uc001ape.3/473, intron 2 of 23)	1	8525030	8813897	288868	2	473	uc001aph.1	50025	ENSG00000142599	RERE	arginine-glutamic acid dipeptide repeats
chr1	8772447	8772705	259	*	CK6___lt__120_BAM_filter_on_data_707_peak_307b	111	.	7.28324	14.2658	11.1691	195	Intron (uc001ape.3/473, intron 2 of 23)	1	8525030	8813897	288868	2	473	uc001aph.1	41192	ENSG00000142599	RERE	arginine-glutamic acid dipeptide repeats
chr1	8772447	8772705	259	*	CK6___lt__120_BAM_filter_on_data_707_peak_307b	111	.	7.28324	14.2658	11.1691	195	Intron (uc001ape.3/473, intron 2 of 23)	1	8525030	8813897	288868	2	473	uc001aph.1	41192	ENSG00000142599	RERE	arginine-glutamic acid dipeptide repeats
chr1	8772447	8772705	259	*	CK6___lt__120_BAM_filter_on_data_707_peak_307b	111	.	7.28324	14.2658	11.1691	195	Intron (uc001ape.3/473, intron 2 of 23)	1	8525030	8813897	288868	2	473	uc001aph.1	41192	ENSG00000142599	RERE	arginine-glutamic acid dipeptide repeats
chr1	8772830	8773218	389	*	CK6___lt__120_BAM_filter_on_data_707_peak_308	187	.	9.79141	22.1599	18.7517	175	Intron (uc001ape.3/473, intron 2 of 23)	1	8525030	8813897	288868	2	473	uc001aph.1	40679	ENSG00000142599	RERE	arginine-glutamic acid dipeptide repeats
chr1	8772830	8773218	389	*	CK6___lt__120_BAM_filter_on_data_707_peak_308	187	.	9.79141	22.1599	18.7517	175	Intron (uc001ape.3/473, intron 2 of 23)	1	8525030	8813897	288868	2	473	uc001aph.1	40679	ENSG00000142599	RERE	arginine-glutamic acid dipeptide repeats
chr1	8772830	8773218	389	*	CK6___lt__120_BAM_filter_on_data_707_peak_308	187	.	9.79141	22.1599	18.7517	175	Intron (uc001ape.3/473, intron 2 of 23)	1	8525030	8813897	288868	2	473	uc001aph.1	40679	ENSG00000142599	RERE	arginine-glutamic acid dipeptide repeats
chr1	8800235	8800476	242	*	CK6___lt__120_BAM_filter_on_data_707_peak_310	254	.	14.2305	29.0953	25.4638	164	Intron (uc001ape.3/473, intron 2 of 23)	1	8525030	8813897	288868	2	473	uc001aph.1	13421	ENSG00000142599	RERE	arginine-glutamic acid dipeptide repeats
chr1	8877752	8877984	233	*	CK6___lt__120_BAM_filter_on_data_707_peak_312	96	.	7.80986	12.6743	9.65191	141	Promoter (<=1kb)	1	8412464	8877699	465236	2	473	uc001apf.3	-53	ENSG00000142599	RERE	arginine-glutamic acid dipeptide repeats
chr1	8877752	8877984	233	*	CK6___lt__120_BAM_filter_on_data_707_peak_312	96	.	7.80986	12.6743	9.65191	141	Promoter (<=1kb)	1	8412464	8877699	465236	2	473	uc001apf.3	-53	ENSG00000142599	RERE	arginine-glutamic acid dipeptide repeats
chr1	8938706	8938903	198	*	CK6___lt__120_BAM_filter_on_data_707_peak_318	231	.	8.50237	26.73	23.1704	120	Promoter (<=1kb)	1	8938894	8939943	1050	1	100505975	uc021oft.1	0	ENSG00000230679	ENO1-AS1	ENO1 antisense RNA 1
chr1	9007425	9007835	411	*	CK6___lt__120_BAM_filter_on_data_707_peak_322a	123	.	9.1005	15.5541	12.3999	122	Promoter (1-2kb)	1	9005893	9035148	29256	1	765	uc031pld.1	1532	ENSG00000131686	CA6	carbonic anhydrase 6
chr1	9007425	9007835	411	*	CK6___lt__120_BAM_filter_on_data_707_peak_322b	98	.	7.96294	12.9307	9.89644	304	Promoter (1-2kb)	1	9005893	9035148	29256	1	765	uc031pld.1	1532	ENSG00000131686	CA6	carbonic anhydrase 6
chr1	9168389	9168541	153	*	CK6___lt__120_BAM_filter_on_data_707_peak_326	141	.	10.1629	17.4083	14.177	108	Intron (uc001apq.1/80045, intron 2 of 3)	1	9117507	9148510	31004	2	6518	uc021ofv.1	-19879	ENSG00000142583	SLC2A5	solute carrier family 2 member 5
chr1	9180488	9180734	247	*	CK6___lt__120_BAM_filter_on_data_707_peak_328	316	.	13.4172	35.5005	31.6872	120	Intron (uc001apq.1/80045, intron 1 of 3)	1	9164476	9189229	24754	2	80045	uc001apq.1	8495	ENSG00000180758	GPR157	G protein-coupled receptor 157
chr1	9189179	9189436	258	*	CK6___lt__120_BAM_filter_on_data_707_peak_331	764	.	21.7235	81.225	76.4817	154	Promoter (<=1kb)	1	9164476	9189229	24754	2	80045	uc001apq.1	0	ENSG00000180758	GPR157	G protein-coupled receptor 157
chr1	9222991	9223273	283	*	CK6___lt__120_BAM_filter_on_data_707_peak_334	693	.	19.0809	73.9272	69.3068	203	Intron (uc009vmq.3/uc009vmq.3, intron 1 of 1)	1	9211727	9211836	110	2	407040	uc021ofw.1	-11155	ENSG00000284357	MIR34A	microRNA 34a
chr1	9223930	9224262	333	*	CK6___lt__120_BAM_filter_on_data_707_peak_335a	128	.	6.75537	15.9735	12.8005	109	Intron (uc009vmq.3/uc009vmq.3, intron 1 of 1)	1	9211727	9211836	110	2	407040	uc021ofw.1	-12094	ENSG00000284357	MIR34A	microRNA 34a
chr1	9223930	9224262	333	*	CK6___lt__120_BAM_filter_on_data_707_peak_335a	128	.	6.75537	15.9735	12.8005	109	Intron (uc009vmq.3/uc009vmq.3, intron 1 of 1)	1	9211727	9211836	110	2	407040	uc021ofw.1	-12094	ENSG00000284357	MIR34A	microRNA 34a
chr1	9223930	9224262	333	*	CK6___lt__120_BAM_filter_on_data_707_peak_335b	306	.	11.1723	34.4389	30.654	266	Intron (uc009vmq.3/uc009vmq.3, intron 1 of 1)	1	9211727	9211836	110	2	407040	uc021ofw.1	-12094	ENSG00000284357	MIR34A	microRNA 34a
chr1	9223930	9224262	333	*	CK6___lt__120_BAM_filter_on_data_707_peak_335b	306	.	11.1723	34.4389	30.654	266	Intron (uc009vmq.3/uc009vmq.3, intron 1 of 1)	1	9211727	9211836	110	2	407040	uc021ofw.1	-12094	ENSG00000284357	MIR34A	microRNA 34a
chr1	9240170	9240480	311	*	CK6___lt__120_BAM_filter_on_data_707_peak_337a	110	.	8.47634	14.1351	11.0439	79	Intron (uc009vmq.3/uc009vmq.3, intron 1 of 1)	1	9211727	9211836	110	2	407040	uc021ofw.1	-28334	ENSG00000284357	MIR34A	microRNA 34a
chr1	9240170	9240480	311	*	CK6___lt__120_BAM_filter_on_data_707_peak_337a	110	.	8.47634	14.1351	11.0439	79	Intron (uc009vmq.3/uc009vmq.3, intron 1 of 1)	1	9211727	9211836	110	2	407040	uc021ofw.1	-28334	ENSG00000284357	MIR34A	microRNA 34a
chr1	9240170	9240480	311	*	CK6___lt__120_BAM_filter_on_data_707_peak_337b	123	.	9.04143	15.4543	12.3043	237	Intron (uc009vmq.3/uc009vmq.3, intron 1 of 1)	1	9211727	9211836	110	2	407040	uc021ofw.1	-28334	ENSG00000284357	MIR34A	microRNA 34a
chr1	9240170	9240480	311	*	CK6___lt__120_BAM_filter_on_data_707_peak_337b	123	.	9.04143	15.4543	12.3043	237	Intron (uc009vmq.3/uc009vmq.3, intron 1 of 1)	1	9211727	9211836	110	2	407040	uc021ofw.1	-28334	ENSG00000284357	MIR34A	microRNA 34a
chr1	9294849	9295050	202	*	CK6___lt__120_BAM_filter_on_data_707_peak_341a	97	.	7.40675	12.7614	9.73485	55	Promoter (<=1kb)	1	9294863	9331394	36532	1	9563	uc001apt.3	0	ENSG00000049239	H6PD	hexose-6-phosphate dehydrogenase/glucose 1-dehydrogenase
chr1	9294849	9295050	202	*	CK6___lt__120_BAM_filter_on_data_707_peak_341b	169	.	9.98359	20.3048	16.9637	255	Promoter (<=1kb)	1	9294863	9331394	36532	1	9563	uc001apt.3	0	ENSG00000049239	H6PD	hexose-6-phosphate dehydrogenase/glucose 1-dehydrogenase
chr1	9327200	9327433	234	*	CK6___lt__120_BAM_filter_on_data_707_peak_344	146	.	10.4292	17.8962	14.6459	149	3' UTR	1	9352941	9429590	76650	1	80176	uc010oae.2	-25508	ENSG00000171621	SPSB1	splA/ryanodine receptor domain and SOCS box containing 1
chr1	9327200	9327433	234	*	CK6___lt__120_BAM_filter_on_data_707_peak_344	146	.	10.4292	17.8962	14.6459	149	3' UTR	1	9352941	9429590	76650	1	80176	uc010oae.2	-25508	ENSG00000171621	SPSB1	splA/ryanodine receptor domain and SOCS box containing 1
chr1	9362953	9363541	589	*	CK6___lt__120_BAM_filter_on_data_707_peak_347a	95	.	6.30706	12.5485	9.53232	76	Intron (uc010oae.2/80176, intron 1 of 2)	1	9352941	9429590	76650	1	80176	uc010oae.2	10012	ENSG00000171621	SPSB1	splA/ryanodine receptor domain and SOCS box containing 1
chr1	9362953	9363541	589	*	CK6___lt__120_BAM_filter_on_data_707_peak_347a	95	.	6.30706	12.5485	9.53232	76	Intron (uc010oae.2/80176, intron 1 of 2)	1	9352941	9429590	76650	1	80176	uc010oae.2	10012	ENSG00000171621	SPSB1	splA/ryanodine receptor domain and SOCS box containing 1
chr1	9362953	9363541	589	*	CK6___lt__120_BAM_filter_on_data_707_peak_347b	498	.	17.0291	54.1085	49.8487	433	Intron (uc010oae.2/80176, intron 1 of 2)	1	9352941	9429590	76650	1	80176	uc010oae.2	10012	ENSG00000171621	SPSB1	splA/ryanodine receptor domain and SOCS box containing 1
chr1	9362953	9363541	589	*	CK6___lt__120_BAM_filter_on_data_707_peak_347b	498	.	17.0291	54.1085	49.8487	433	Intron (uc010oae.2/80176, intron 1 of 2)	1	9352941	9429590	76650	1	80176	uc010oae.2	10012	ENSG00000171621	SPSB1	splA/ryanodine receptor domain and SOCS box containing 1
chr1	9371143	9371443	301	*	CK6___lt__120_BAM_filter_on_data_707_peak_348	795	.	21.9356	84.3617	79.5669	113	Intron (uc010oae.2/80176, intron 1 of 2)	1	9352941	9429590	76650	1	80176	uc010oae.2	18202	ENSG00000171621	SPSB1	splA/ryanodine receptor domain and SOCS box containing 1
chr1	9384472	9384839	368	*	CK6___lt__120_BAM_filter_on_data_707_peak_350a	410	.	14.7626	45.133	41.0743	158	Intron (uc010oae.2/80176, intron 1 of 2)	1	9415766	9429590	13825	1	80176	uc001apv.3	-30927	ENSG00000171621	SPSB1	splA/ryanodine receptor domain and SOCS box containing 1
chr1	9384472	9384839	368	*	CK6___lt__120_BAM_filter_on_data_707_peak_350b	346	.	13.2015	38.535	34.6417	270	Intron (uc010oae.2/80176, intron 1 of 2)	1	9415766	9429590	13825	1	80176	uc001apv.3	-30927	ENSG00000171621	SPSB1	splA/ryanodine receptor domain and SOCS box containing 1
chr1	9599274	9599648	375	*	CK6___lt__120_BAM_filter_on_data_707_peak_364	536	.	19.1053	58.0152	53.6769	130	Promoter (<=1kb)	1	9599528	9642831	43304	1	84275	uc001apw.3	0	ENSG00000171612	SLC25A33	solute carrier family 25 member 33
chr1	9634782	9634973	192	*	CK6___lt__120_BAM_filter_on_data_707_peak_366	173	.	11.7404	20.6631	17.3087	67	Intron (uc001apw.3/84275, intron 5 of 6)	1	9648932	9665020	16089	1	199953	uc001apy.3	-13959	ENSG00000188807	TMEM201	transmembrane protein 201
chr1	9648627	9648939	313	*	CK6___lt__120_BAM_filter_on_data_707_peak_367a	314	.	15.2359	35.2296	31.4241	61	Promoter (<=1kb)	1	9648932	9665020	16089	1	199953	uc001apy.3	0	ENSG00000188807	TMEM201	transmembrane protein 201
chr1	9648627	9648939	313	*	CK6___lt__120_BAM_filter_on_data_707_peak_367a	314	.	15.2359	35.2296	31.4241	61	Promoter (<=1kb)	1	9648932	9665020	16089	1	199953	uc001apy.3	0	ENSG00000188807	TMEM201	transmembrane protein 201
chr1	9648627	9648939	313	*	CK6___lt__120_BAM_filter_on_data_707_peak_367b	115	.	8.03356	14.6305	11.5176	244	Promoter (<=1kb)	1	9648932	9665020	16089	1	199953	uc001apy.3	0	ENSG00000188807	TMEM201	transmembrane protein 201
chr1	9648627	9648939	313	*	CK6___lt__120_BAM_filter_on_data_707_peak_367b	115	.	8.03356	14.6305	11.5176	244	Promoter (<=1kb)	1	9648932	9665020	16089	1	199953	uc001apy.3	0	ENSG00000188807	TMEM201	transmembrane protein 201
chr1	9749476	9749599	124	*	CK6___lt__120_BAM_filter_on_data_707_peak_373	152	.	9.24974	18.5561	15.2803	56	Promoter (1-2kb)	1	9751525	9789172	37648	1	5293	uc010oaf.2	-1926	ENSG00000171608	PIK3CD	phosphatidylinositol-4,5-bisphosphate 3-kinase catalytic subunit delta
chr1	9751255	9751413	159	*	CK6___lt__120_BAM_filter_on_data_707_peak_374	109	.	7.64178	13.9854	10.9012	204	Promoter (<=1kb)	1	9751525	9789172	37648	1	5293	uc010oaf.2	-112	ENSG00000171608	PIK3CD	phosphatidylinositol-4,5-bisphosphate 3-kinase catalytic subunit delta
chr1	9777534	9777954	421	*	CK6___lt__120_BAM_filter_on_data_707_peak_376a	376	.	12.6934	41.6368	37.6634	170	Exon (uc001aqb.4/5293, exon 8 of 24)	1	9770163	9789172	19010	1	5293	uc001aqe.4	7371	ENSG00000171608	PIK3CD	phosphatidylinositol-4,5-bisphosphate 3-kinase catalytic subunit delta
chr1	9777534	9777954	421	*	CK6___lt__120_BAM_filter_on_data_707_peak_376a	376	.	12.6934	41.6368	37.6634	170	Exon (uc001aqb.4/5293, exon 8 of 24)	1	9770163	9789172	19010	1	5293	uc001aqe.4	7371	ENSG00000171608	PIK3CD	phosphatidylinositol-4,5-bisphosphate 3-kinase catalytic subunit delta
chr1	9777534	9777954	421	*	CK6___lt__120_BAM_filter_on_data_707_peak_376b	717	.	19.4576	76.4526	71.7899	393	Exon (uc001aqb.4/5293, exon 8 of 24)	1	9770163	9789172	19010	1	5293	uc001aqe.4	7371	ENSG00000171608	PIK3CD	phosphatidylinositol-4,5-bisphosphate 3-kinase catalytic subunit delta
chr1	9777534	9777954	421	*	CK6___lt__120_BAM_filter_on_data_707_peak_376b	717	.	19.4576	76.4526	71.7899	393	Exon (uc001aqb.4/5293, exon 8 of 24)	1	9770163	9789172	19010	1	5293	uc001aqe.4	7371	ENSG00000171608	PIK3CD	phosphatidylinositol-4,5-bisphosphate 3-kinase catalytic subunit delta
chr1	9797081	9797412	332	*	CK6___lt__120_BAM_filter_on_data_707_peak_377	186	.	12.1572	22.0595	18.655	278	Intron (uc001aqh.3/22883, intron 11 of 18)	1	9789079	9793604	4526	2	22883	uc001aqf.3	-3477	ENSG00000171603	CLSTN1	calsyntenin 1
chr1	9797081	9797412	332	*	CK6___lt__120_BAM_filter_on_data_707_peak_377	186	.	12.1572	22.0595	18.655	278	Intron (uc001aqh.3/22883, intron 11 of 18)	1	9789079	9793604	4526	2	22883	uc001aqf.3	-3477	ENSG00000171603	CLSTN1	calsyntenin 1
chr1	9825959	9826319	361	*	CK6___lt__120_BAM_filter_on_data_707_peak_378	281	.	11.4842	31.8854	28.1727	95	Intron (uc001aqh.3/22883, intron 2 of 18)	1	9789079	9793604	4526	2	22883	uc001aqf.3	-32355	ENSG00000171603	CLSTN1	calsyntenin 1
chr1	9825959	9826319	361	*	CK6___lt__120_BAM_filter_on_data_707_peak_378	281	.	11.4842	31.8854	28.1727	95	Intron (uc001aqh.3/22883, intron 2 of 18)	1	9789079	9793604	4526	2	22883	uc001aqf.3	-32355	ENSG00000171603	CLSTN1	calsyntenin 1
chr1	9826863	9827098	236	*	CK6___lt__120_BAM_filter_on_data_707_peak_379	188	.	8.97302	22.3122	18.8987	180	Intron (uc001aqh.3/22883, intron 2 of 18)	1	9789079	9793604	4526	2	22883	uc001aqf.3	-33259	ENSG00000171603	CLSTN1	calsyntenin 1
chr1	9858547	9858722	176	*	CK6___lt__120_BAM_filter_on_data_707_peak_381	224	.	13.3435	25.9439	22.4095	98	Intron (uc001aqh.3/22883, intron 1 of 18)	1	9789079	9884550	95472	2	22883	uc001aqh.3	25828	ENSG00000171603	CLSTN1	calsyntenin 1
chr1	9941923	9942154	232	*	CK6___lt__120_BAM_filter_on_data_707_peak_382	193	.	12.0626	22.7501	19.3214	138	Intron (uc001aqk.1/56998, intron 2 of 5)	1	9908334	9970316	61983	2	56998	uc001aqk.1	28162	ENSG00000178585	CTNNBIP1	catenin beta interacting protein 1
chr1	9949121	9949269	149	*	CK6___lt__120_BAM_filter_on_data_707_peak_383	215	.	9.51087	25.0212	21.5166	181	Intron (uc001aqk.1/56998, intron 1 of 5)	1	9908334	9970316	61983	2	56998	uc001aqk.1	21047	ENSG00000178585	CTNNBIP1	catenin beta interacting protein 1
chr1	9951322	9951451	130	*	CK6___lt__120_BAM_filter_on_data_707_peak_384	101	.	6.21708	13.2015	10.1541	72	Intron (uc001aqk.1/56998, intron 1 of 5)	1	9908334	9970316	61983	2	56998	uc001aqk.1	18865	ENSG00000178585	CTNNBIP1	catenin beta interacting protein 1
chr1	9960486	9960642	157	*	CK6___lt__120_BAM_filter_on_data_707_peak_386	134	.	9.73666	16.6489	13.4485	74	Intron (uc001aqk.1/56998, intron 1 of 5)	1	9908334	9970316	61983	2	56998	uc001aqk.1	9674	ENSG00000178585	CTNNBIP1	catenin beta interacting protein 1
chr1	9970291	9970777	487	*	CK6___lt__120_BAM_filter_on_data_707_peak_387	655	.	18.886	70.1253	65.5688	220	Promoter (<=1kb)	1	9908334	9970316	61983	2	56998	uc001aqk.1	0	ENSG00000178585	CTNNBIP1	catenin beta interacting protein 1
chr1	9989512	9989777	266	*	CK6___lt__120_BAM_filter_on_data_707_peak_388b	518	.	18.9761	56.1357	51.8349	257	3' UTR	1	9989776	10002840	13065	2	84328	uc001aqm.3	13063	ENSG00000162441	LZIC	leucine zipper and CTNNBIP1 domain containing
chr1	10003379	10003542	164	*	CK6___lt__120_BAM_filter_on_data_707_peak_390	113	.	7.91187	14.4305	11.3259	191	Promoter (<=1kb)	1	10003486	10045556	42071	1	64802	uc001aqp.3	0	ENSG00000173614	NMNAT1	nicotinamide nucleotide adenylyltransferase 1
chr1	10061113	10061385	273	*	CK6___lt__120_BAM_filter_on_data_707_peak_392	166	.	11.1884	19.9359	16.6079	144	Intron (uc001aqq.3/116362, intron 1 of 3)	1	10057255	10076078	18824	1	116362	uc009vms.3	3858	ENSG00000162444	RBP7	retinol binding protein 7
chr1	10072980	10073148	169	*	CK6___lt__120_BAM_filter_on_data_707_peak_393	144	.	10.1327	17.7007	14.4577	93	Intron (uc001aqq.3/116362, intron 3 of 3)	1	10057255	10076078	18824	1	116362	uc009vms.3	15725	ENSG00000162444	RBP7	retinol binding protein 7
chr1	10092674	10093203	530	*	CK6___lt__120_BAM_filter_on_data_707_peak_394a	428	.	14.2329	46.9981	42.8963	256	Promoter (<=1kb)	1	10093041	10241296	148256	1	10277	uc001aqr.4	0	ENSG00000130939	UBE4B	ubiquitination factor E4B
chr1	10092674	10093203	530	*	CK6___lt__120_BAM_filter_on_data_707_peak_394a	428	.	14.2329	46.9981	42.8963	256	Promoter (<=1kb)	1	10093041	10241296	148256	1	10277	uc001aqr.4	0	ENSG00000130939	UBE4B	ubiquitination factor E4B
chr1	10092674	10093203	530	*	CK6___lt__120_BAM_filter_on_data_707_peak_394b	134	.	7.11645	16.6939	13.4923	435	Promoter (<=1kb)	1	10093041	10241296	148256	1	10277	uc001aqr.4	0	ENSG00000130939	UBE4B	ubiquitination factor E4B
chr1	10092674	10093203	530	*	CK6___lt__120_BAM_filter_on_data_707_peak_394b	134	.	7.11645	16.6939	13.4923	435	Promoter (<=1kb)	1	10093041	10241296	148256	1	10277	uc001aqr.4	0	ENSG00000130939	UBE4B	ubiquitination factor E4B
chr1	10117297	10117646	350	*	CK6___lt__120_BAM_filter_on_data_707_peak_396	215	.	11.4907	25.0851	21.5783	257	Intron (uc001aqr.4/10277, intron 1 of 26)	1	10093041	10241296	148256	1	10277	uc021ogc.1	24256	ENSG00000130939	UBE4B	ubiquitination factor E4B
chr1	10117297	10117646	350	*	CK6___lt__120_BAM_filter_on_data_707_peak_396	215	.	11.4907	25.0851	21.5783	257	Intron (uc001aqr.4/10277, intron 1 of 26)	1	10093041	10241296	148256	1	10277	uc021ogc.1	24256	ENSG00000130939	UBE4B	ubiquitination factor E4B
chr1	10127198	10127457	260	*	CK6___lt__120_BAM_filter_on_data_707_peak_398	261	.	13.1865	29.7933	26.1412	151	Intron (uc001aqr.4/10277, intron 1 of 26)	1	10093041	10241296	148256	1	10277	uc021ogc.1	34157	ENSG00000130939	UBE4B	ubiquitination factor E4B
chr1	10134399	10134762	364	*	CK6___lt__120_BAM_filter_on_data_707_peak_399	662	.	23.3125	70.7765	66.2083	124	Intron (uc001aqr.4/10277, intron 2 of 26)	1	10093041	10241296	148256	1	10277	uc021ogc.1	41358	ENSG00000130939	UBE4B	ubiquitination factor E4B
chr1	10232684	10233035	352	*	CK6___lt__120_BAM_filter_on_data_707_peak_402	99	.	7.98904	12.9746	9.93865	138	Promoter (1-2kb)	1	10231014	10241296	10283	1	10277	uc001aqu.3	1670	ENSG00000130939	UBE4B	ubiquitination factor E4B
chr1	10270475	10270629	155	*	CK6___lt__120_BAM_filter_on_data_707_peak_405	81	.	7.20181	11.0633	8.12231	90	Promoter (<=1kb)	1	10270764	10334469	63706	1	23095	uc009vmt.3	-135	ENSG00000054523	KIF1B	kinesin family member 1B
chr1	10355517	10356051	535	*	CK6___lt__120_BAM_filter_on_data_707_peak_409a	252	.	12.6438	28.8729	25.2479	206	Exon (uc001aqv.4/23095, exon 17 of 21)	1	10292308	10441655	149348	1	23095	uc001arb.3	63209	ENSG00000054523	KIF1B	kinesin family member 1B
chr1	10355517	10356051	535	*	CK6___lt__120_BAM_filter_on_data_707_peak_409a	252	.	12.6438	28.8729	25.2479	206	Exon (uc001aqv.4/23095, exon 17 of 21)	1	10292308	10441655	149348	1	23095	uc001arb.3	63209	ENSG00000054523	KIF1B	kinesin family member 1B
chr1	10355517	10356051	535	*	CK6___lt__120_BAM_filter_on_data_707_peak_409b	306	.	14.3644	34.4309	30.6463	364	Exon (uc001aqv.4/23095, exon 17 of 21)	1	10292308	10441655	149348	1	23095	uc001arb.3	63209	ENSG00000054523	KIF1B	kinesin family member 1B
chr1	10355517	10356051	535	*	CK6___lt__120_BAM_filter_on_data_707_peak_409b	306	.	14.3644	34.4309	30.6463	364	Exon (uc001aqv.4/23095, exon 17 of 21)	1	10292308	10441655	149348	1	23095	uc001arb.3	63209	ENSG00000054523	KIF1B	kinesin family member 1B
chr1	10427632	10427799	168	*	CK6___lt__120_BAM_filter_on_data_707_peak_410	86	.	7.38762	11.5943	8.62732	55	Intron (uc001aqw.4/23095, intron 41 of 46)	1	10459085	10480201	21117	1	5226	uc001arc.3	-31286	ENSG00000142657	PGD	phosphogluconate dehydrogenase
chr1	10458925	10459124	200	*	CK6___lt__120_BAM_filter_on_data_707_peak_412	200	.	12.4742	23.4623	20.0091	88	Promoter (<=1kb)	1	10459085	10480201	21117	1	5226	uc001arc.3	0	ENSG00000142657	PGD	phosphogluconate dehydrogenase
chr1	10532526	10532842	317	*	CK6___lt__120_BAM_filter_on_data_707_peak_415	309	.	13.39	34.7702	30.9763	203	Promoter (<=1kb)	1	10520603	10532613	12011	2	1676	uc001arj.3	0	ENSG00000160049	DFFA	DNA fragmentation factor subunit alpha
chr1	11039525	11039937	413	*	CK6___lt__120_BAM_filter_on_data_707_peak_422	555	.	15.6723	59.8947	55.5223	260	Promoter (2-3kb)	1	11006530	11042094	35565	2	148345	uc010oao.2	2157	ENSG00000175262	C1orf127	chromosome 1 open reading frame 127
chr1	11120103	11120356	254	*	CK6___lt__120_BAM_filter_on_data_707_peak_425	141	.	6.19668	17.3457	14.1174	104	Promoter (<=1kb)	1	11114649	11120091	5443	2	6723	uc001arz.1	-12	ENSG00000116649	SRM	spermidine synthase
chr1	11120103	11120356	254	*	CK6___lt__120_BAM_filter_on_data_707_peak_425	141	.	6.19668	17.3457	14.1174	104	Promoter (<=1kb)	1	11114649	11120091	5443	2	6723	uc001arz.1	-12	ENSG00000116649	SRM	spermidine synthase
chr1	11122974	11123343	370	*	CK6___lt__120_BAM_filter_on_data_707_peak_426b	853	.	18.1143	90.1946	85.3094	243	Promoter (2-3kb)	1	11114649	11120091	5443	2	6723	uc001arz.1	-2883	ENSG00000116649	SRM	spermidine synthase
chr1	11159878	11160158	281	*	CK6___lt__120_BAM_filter_on_data_707_peak_427a	100	.	7.81672	13.0405	10.0013	75	Promoter (<=1kb)	1	11126676	11159938	33263	2	5394	uc001asa.3	0	ENSG00000171824	EXOSC10	exosome component 10
chr1	11159878	11160158	281	*	CK6___lt__120_BAM_filter_on_data_707_peak_427b	271	.	14.5477	30.8236	27.1419	231	Promoter (<=1kb)	1	11126676	11159938	33263	2	5394	uc001asa.3	0	ENSG00000171824	EXOSC10	exosome component 10
chr1	11169178	11169859	682	*	CK6___lt__120_BAM_filter_on_data_707_peak_428a	655	.	15.1217	70.0945	65.5387	268	Exon (uc001asc.3/2475, exon 17 of 20)	1	11139768	11159938	20171	2	5394	uc009vmy.1	-9240	ENSG00000171824	EXOSC10	exosome component 10
chr1	11169178	11169859	682	*	CK6___lt__120_BAM_filter_on_data_707_peak_428a	655	.	15.1217	70.0945	65.5387	268	Exon (uc001asc.3/2475, exon 17 of 20)	1	11139768	11159938	20171	2	5394	uc009vmy.1	-9240	ENSG00000171824	EXOSC10	exosome component 10
chr1	11169178	11169859	682	*	CK6___lt__120_BAM_filter_on_data_707_peak_428b	486	.	12.5025	52.8975	48.6629	423	Exon (uc001asc.3/2475, exon 17 of 20)	1	11139768	11159938	20171	2	5394	uc009vmy.1	-9240	ENSG00000171824	EXOSC10	exosome component 10
chr1	11169178	11169859	682	*	CK6___lt__120_BAM_filter_on_data_707_peak_428b	486	.	12.5025	52.8975	48.6629	423	Exon (uc001asc.3/2475, exon 17 of 20)	1	11139768	11159938	20171	2	5394	uc009vmy.1	-9240	ENSG00000171824	EXOSC10	exosome component 10
chr1	11234376	11234908	533	*	CK6___lt__120_BAM_filter_on_data_707_peak_432	1075	.	20.6423	112.743	107.55	264	Intron (uc001asd.3/2475, intron 28 of 57)	1	11249346	11256038	6693	1	10218	uc001ase.4	-14438	ENSG00000171819	ANGPTL7	angiopoietin like 7
chr1	11240279	11240854	576	*	CK6___lt__120_BAM_filter_on_data_707_peak_434	1728	.	23.1076	178.722	172.865	297	Intron (uc001asd.3/2475, intron 28 of 57)	1	11249346	11256038	6693	1	10218	uc001ase.4	-8492	ENSG00000171819	ANGPTL7	angiopoietin like 7
chr1	11240279	11240854	576	*	CK6___lt__120_BAM_filter_on_data_707_peak_434	1728	.	23.1076	178.722	172.865	297	Intron (uc001asd.3/2475, intron 28 of 57)	1	11249346	11256038	6693	1	10218	uc001ase.4	-8492	ENSG00000171819	ANGPTL7	angiopoietin like 7
chr1	11247152	11247271	120	*	CK6___lt__120_BAM_filter_on_data_707_peak_435	110	.	6.9762	14.1718	11.0793	65	Promoter (2-3kb)	1	11249346	11256038	6693	1	10218	uc001ase.4	-2075	ENSG00000171819	ANGPTL7	angiopoietin like 7
chr1	11248103	11248381	279	*	CK6___lt__120_BAM_filter_on_data_707_peak_436	331	.	13.4679	36.967	33.1141	177	Promoter (<=1kb)	1	11249346	11256038	6693	1	10218	uc001ase.4	-965	ENSG00000171819	ANGPTL7	angiopoietin like 7
chr1	11322599	11322938	340	*	CK6___lt__120_BAM_filter_on_data_707_peak_441	523	.	18.3951	56.7007	52.3888	147	Promoter (<=1kb)	1	11166588	11322608	156021	2	2475	uc001asd.3	0	ENSG00000198793	MTOR	mechanistic target of rapamycin kinase
chr1	11333074	11333325	252	*	CK6___lt__120_BAM_filter_on_data_707_peak_442a	98	.	7.93701	12.8871	9.85525	74	Promoter (<=1kb)	1	11333255	11348491	15237	1	29914	uc001asg.3	0	ENSG00000120942	UBIAD1	UbiA prenyltransferase domain containing 1
chr1	11333074	11333325	252	*	CK6___lt__120_BAM_filter_on_data_707_peak_442b	99	.	7.98904	12.9746	9.93865	344	Promoter (<=1kb)	1	11333255	11348491	15237	1	29914	uc001asg.3	0	ENSG00000120942	UBIAD1	UbiA prenyltransferase domain containing 1
chr1	11708074	11708370	297	*	CK6___lt__120_BAM_filter_on_data_707_peak_446	274	.	13.1992	31.1035	27.4132	193	Downstream (<1kb)	1	11709144	11714401	5258	2	26232	uc009vnb.1	6031	ENSG00000116661	FBXO2	F-box protein 2
chr1	11728755	11729069	315	*	CK6___lt__120_BAM_filter_on_data_707_peak_448	224	.	13.0537	25.9773	22.4418	183	Exon (uc001aso.3/26270, exon 2 of 6)	1	11724150	11734409	10260	1	26270	uc001aso.3	4605	ENSG00000116663	FBXO6	F-box protein 6
chr1	11741275	11741582	308	*	CK6___lt__120_BAM_filter_on_data_707_peak_449	114	.	8.92511	14.6032	11.4917	99	Promoter (<=1kb)	1	11734537	11741495	6959	2	10459	uc001asp.3	0	ENSG00000116670	MAD2L2	mitotic arrest deficient 2 like 2
chr1	11741275	11741582	308	*	CK6___lt__120_BAM_filter_on_data_707_peak_449	114	.	8.92511	14.6032	11.4917	99	Promoter (<=1kb)	1	11734537	11741495	6959	2	10459	uc001asp.3	0	ENSG00000116670	MAD2L2	mitotic arrest deficient 2 like 2
chr1	11753260	11753544	285	*	CK6___lt__120_BAM_filter_on_data_707_peak_450	171	.	11.0158	20.4938	17.1456	171	Promoter (1-2kb)	1	11751781	11780336	28556	1	374946	uc001asr.1	1479	ENSG00000162490	DRAXIN	dorsal inhibitory axon guidance protein
chr1	11795964	11796188	225	*	CK6___lt__120_BAM_filter_on_data_707_peak_452	105	.	7.95679	13.658	10.589	122	Promoter (<=1kb)	1	11796142	11810828	14687	1	57085	uc001ast.3	0	ENSG00000177674	AGTRAP	angiotensin II receptor associated protein
chr1	11865952	11866493	542	*	CK6___lt__120_BAM_filter_on_data_707_peak_455a	1075	.	22.3294	112.706	107.513	149	Promoter (<=1kb)	1	11866153	11876844	10692	1	1185	uc009vne.2	0	ENSG00000011021	CLCN6	chloride voltage-gated channel 6
chr1	11865952	11866493	542	*	CK6___lt__120_BAM_filter_on_data_707_peak_455a	1075	.	22.3294	112.706	107.513	149	Promoter (<=1kb)	1	11866153	11876844	10692	1	1185	uc009vne.2	0	ENSG00000011021	CLCN6	chloride voltage-gated channel 6
chr1	11988018	11988362	345	*	CK6___lt__120_BAM_filter_on_data_707_peak_462a	187	.	10.1021	22.1429	18.7355	120	Promoter (1-2kb)	1	11982232	11986485	4254	2	90231	uc001atl.2	-1533	ENSG00000116685	KIAA2013	KIAA2013
chr1	11988018	11988362	345	*	CK6___lt__120_BAM_filter_on_data_707_peak_462a	187	.	10.1021	22.1429	18.7355	120	Promoter (1-2kb)	1	11982232	11986485	4254	2	90231	uc001atl.2	-1533	ENSG00000116685	KIAA2013	KIAA2013
chr1	11988018	11988362	345	*	CK6___lt__120_BAM_filter_on_data_707_peak_462b	187	.	10.1021	22.1429	18.7355	250	Promoter (1-2kb)	1	11982232	11986485	4254	2	90231	uc001atl.2	-1533	ENSG00000116685	KIAA2013	KIAA2013
chr1	11988018	11988362	345	*	CK6___lt__120_BAM_filter_on_data_707_peak_462b	187	.	10.1021	22.1429	18.7355	250	Promoter (1-2kb)	1	11982232	11986485	4254	2	90231	uc001atl.2	-1533	ENSG00000116685	KIAA2013	KIAA2013
chr1	12000676	12000939	264	*	CK6___lt__120_BAM_filter_on_data_707_peak_464	824	.	28.4527	87.2657	82.4231	144	Intron (uc001atm.3/5351, intron 1 of 18)	1	11994724	12035599	40876	1	5351	uc010obb.2	5952	ENSG00000083444	PLOD1	procollagen-lysine,2-oxoglutarate 5-dioxygenase 1
chr1	12015447	12015587	141	*	CK6___lt__120_BAM_filter_on_data_707_peak_465	92	.	7.91048	12.2479	9.24653	78	Intron (uc001atm.3/5351, intron 6 of 18)	1	11994724	12035599	40876	1	5351	uc010obb.2	20723	ENSG00000083444	PLOD1	procollagen-lysine,2-oxoglutarate 5-dioxygenase 1
chr1	12040048	12040477	430	*	CK6___lt__120_BAM_filter_on_data_707_peak_468	839	.	25.1035	88.8159	83.9499	288	Promoter (<=1kb)	1	12040238	12073572	33335	1	9927	uc001atn.4	0	ENSG00000116688	MFN2	mitofusin 2
chr1	12079284	12079594	311	*	CK6___lt__120_BAM_filter_on_data_707_peak_469	1001	.	27.6011	105.279	100.187	160	Promoter (<=1kb)	1	12079299	12092106	12808	1	60672	uc001ato.2	0	ENSG00000116691	MIIP	migration and invasion inhibitory protein
chr1	12140310	12140549	240	*	CK6___lt__120_BAM_filter_on_data_707_peak_471	239	.	13.9702	27.5457	23.9613	164	Intron (uc001atq.3/943, intron 1 of 14)	1	12123434	12204264	80831	1	943	uc010obc.2	16876	ENSG00000120949	TNFRSF8	TNF receptor superfamily member 8
chr1	12193073	12193543	471	*	CK6___lt__120_BAM_filter_on_data_707_peak_474a	214	.	11.7547	24.942	21.4395	122	Intron (uc001atq.3/943, intron 12 of 14)	1	12185958	12204264	18307	1	943	uc001ats.3	7115	ENSG00000120949	TNFRSF8	TNF receptor superfamily member 8
chr1	12193073	12193543	471	*	CK6___lt__120_BAM_filter_on_data_707_peak_474a	214	.	11.7547	24.942	21.4395	122	Intron (uc001atq.3/943, intron 12 of 14)	1	12185958	12204264	18307	1	943	uc001ats.3	7115	ENSG00000120949	TNFRSF8	TNF receptor superfamily member 8
chr1	12193073	12193543	471	*	CK6___lt__120_BAM_filter_on_data_707_peak_474b	213	.	11.7242	24.891	21.3905	249	Intron (uc001atq.3/943, intron 12 of 14)	1	12185958	12204264	18307	1	943	uc001ats.3	7115	ENSG00000120949	TNFRSF8	TNF receptor superfamily member 8
chr1	12193073	12193543	471	*	CK6___lt__120_BAM_filter_on_data_707_peak_474b	213	.	11.7242	24.891	21.3905	249	Intron (uc001atq.3/943, intron 12 of 14)	1	12185958	12204264	18307	1	943	uc001ats.3	7115	ENSG00000120949	TNFRSF8	TNF receptor superfamily member 8
chr1	12203725	12204103	379	*	CK6___lt__120_BAM_filter_on_data_707_peak_475a	757	.	20.527	80.4985	75.7653	140	3' UTR	1	12185958	12204264	18307	1	943	uc001ats.3	17767	ENSG00000120949	TNFRSF8	TNF receptor superfamily member 8
chr1	12203725	12204103	379	*	CK6___lt__120_BAM_filter_on_data_707_peak_475a	757	.	20.527	80.4985	75.7653	140	3' UTR	1	12185958	12204264	18307	1	943	uc001ats.3	17767	ENSG00000120949	TNFRSF8	TNF receptor superfamily member 8
chr1	12203725	12204103	379	*	CK6___lt__120_BAM_filter_on_data_707_peak_475b	265	.	10.3493	30.234	26.5689	283	3' UTR	1	12185958	12204264	18307	1	943	uc001ats.3	17767	ENSG00000120949	TNFRSF8	TNF receptor superfamily member 8
chr1	12203725	12204103	379	*	CK6___lt__120_BAM_filter_on_data_707_peak_475b	265	.	10.3493	30.234	26.5689	283	3' UTR	1	12185958	12204264	18307	1	943	uc001ats.3	17767	ENSG00000120949	TNFRSF8	TNF receptor superfamily member 8
chr1	12356758	12357024	267	*	CK6___lt__120_BAM_filter_on_data_707_peak_480	219	.	12.3971	25.4361	21.9175	204	Intron (uc001atv.3/55187, intron 24 of 69)	1	12371511	12398045	26535	1	55187	uc001aty.1	-14487	ENSG00000048707	VPS13D	vacuolar protein sorting 13 homolog D
chr1	12380642	12380976	335	*	CK6___lt__120_BAM_filter_on_data_707_peak_481	181	.	11.8949	21.5833	18.1959	125	Intron (uc001atv.3/55187, intron 32 of 69)	1	12371511	12398045	26535	1	55187	uc001aty.1	9131	ENSG00000048707	VPS13D	vacuolar protein sorting 13 homolog D
chr1	12402526	12402700	175	*	CK6___lt__120_BAM_filter_on_data_707_peak_482	101	.	8.35359	13.1752	10.1288	131	Intron (uc001atv.3/55187, intron 41 of 69)	1	12427725	12572098	144374	1	55187	uc009vnl.3	-25025	ENSG00000048707	VPS13D	vacuolar protein sorting 13 homolog D
chr1	12466114	12466720	607	*	CK6___lt__120_BAM_filter_on_data_707_peak_485b	691	.	12.3265	73.7546	69.1373	266	Intron (uc001atv.3/55187, intron 63 of 69)	1	12469884	12572098	102215	1	55187	uc010obd.2	-3164	ENSG00000048707	VPS13D	vacuolar protein sorting 13 homolog D
chr1	12466114	12466720	607	*	CK6___lt__120_BAM_filter_on_data_707_peak_485b	691	.	12.3265	73.7546	69.1373	266	Intron (uc001atv.3/55187, intron 63 of 69)	1	12469884	12572098	102215	1	55187	uc010obd.2	-3164	ENSG00000048707	VPS13D	vacuolar protein sorting 13 homolog D
chr1	12466114	12466720	607	*	CK6___lt__120_BAM_filter_on_data_707_peak_485c	1362	.	19.2448	141.735	136.224	467	Intron (uc001atv.3/55187, intron 63 of 69)	1	12469884	12572098	102215	1	55187	uc010obd.2	-3164	ENSG00000048707	VPS13D	vacuolar protein sorting 13 homolog D
chr1	12466114	12466720	607	*	CK6___lt__120_BAM_filter_on_data_707_peak_485c	1362	.	19.2448	141.735	136.224	467	Intron (uc001atv.3/55187, intron 63 of 69)	1	12469884	12572098	102215	1	55187	uc010obd.2	-3164	ENSG00000048707	VPS13D	vacuolar protein sorting 13 homolog D
chr1	12467006	12467201	196	*	CK6___lt__120_BAM_filter_on_data_707_peak_486	105	.	4.45094	13.6247	10.5565	98	Promoter (2-3kb)	1	12469884	12572098	102215	1	55187	uc010obd.2	-2683	ENSG00000048707	VPS13D	vacuolar protein sorting 13 homolog D
chr1	12495849	12495993	145	*	CK6___lt__120_BAM_filter_on_data_707_peak_488	127	.	9.52773	15.9624	12.7904	102	Intron (uc001atv.3/55187, intron 65 of 69)	1	12469884	12572098	102215	1	55187	uc010obd.2	25965	ENSG00000048707	VPS13D	vacuolar protein sorting 13 homolog D
chr1	12509161	12509504	344	*	CK6___lt__120_BAM_filter_on_data_707_peak_489a	375	.	13.282	41.4754	37.5061	140	Intron (uc001atv.3/55187, intron 65 of 69)	1	12469884	12572098	102215	1	55187	uc010obd.2	39277	ENSG00000048707	VPS13D	vacuolar protein sorting 13 homolog D
chr1	12509161	12509504	344	*	CK6___lt__120_BAM_filter_on_data_707_peak_489b	313	.	11.8115	35.1145	31.3119	235	Intron (uc001atv.3/55187, intron 65 of 69)	1	12469884	12572098	102215	1	55187	uc010obd.2	39277	ENSG00000048707	VPS13D	vacuolar protein sorting 13 homolog D
chr1	12514715	12515015	301	*	CK6___lt__120_BAM_filter_on_data_707_peak_491	337	.	14.2023	37.6085	33.7387	113	Intron (uc001atv.3/55187, intron 65 of 69)	1	12469884	12572098	102215	1	55187	uc010obd.2	44831	ENSG00000048707	VPS13D	vacuolar protein sorting 13 homolog D
chr1	12538201	12538661	461	*	CK6___lt__120_BAM_filter_on_data_707_peak_492a	356	.	13.3905	39.596	35.6735	164	Intron (uc001atv.3/55187, intron 67 of 69)	1	12567300	12567451	152	1	677882	uc001atz.1	-28639	ENSG00000266079	SNORA59B	small nucleolar RNA, H/ACA box 59B
chr1	12538201	12538661	461	*	CK6___lt__120_BAM_filter_on_data_707_peak_492a	356	.	13.3905	39.596	35.6735	164	Intron (uc001atv.3/55187, intron 67 of 69)	1	12567300	12567451	152	1	677882	uc001atz.1	-28639	ENSG00000266079	SNORA59B	small nucleolar RNA, H/ACA box 59B
chr1	12538201	12538661	461	*	CK6___lt__120_BAM_filter_on_data_707_peak_492b	170	.	8.5212	20.3876	17.043	367	Intron (uc001atv.3/55187, intron 67 of 69)	1	12567300	12567451	152	1	677882	uc001atz.1	-28639	ENSG00000266079	SNORA59B	small nucleolar RNA, H/ACA box 59B
chr1	12538201	12538661	461	*	CK6___lt__120_BAM_filter_on_data_707_peak_492b	170	.	8.5212	20.3876	17.043	367	Intron (uc001atv.3/55187, intron 67 of 69)	1	12567300	12567451	152	1	677882	uc001atz.1	-28639	ENSG00000266079	SNORA59B	small nucleolar RNA, H/ACA box 59B
chr1	12540935	12541046	112	*	CK6___lt__120_BAM_filter_on_data_707_peak_493	96	.	5.76098	12.7062	9.68218	55	Intron (uc001atv.3/55187, intron 67 of 69)	1	12567300	12567451	152	1	677882	uc001atz.1	-26254	ENSG00000266079	SNORA59B	small nucleolar RNA, H/ACA box 59B
chr1	12545759	12546089	331	*	CK6___lt__120_BAM_filter_on_data_707_peak_494	255	.	12.0828	29.1679	25.5344	140	Intron (uc001atv.3/55187, intron 67 of 69)	1	12567300	12567451	152	1	677882	uc001atz.1	-21211	ENSG00000266079	SNORA59B	small nucleolar RNA, H/ACA box 59B
chr1	12545759	12546089	331	*	CK6___lt__120_BAM_filter_on_data_707_peak_494	255	.	12.0828	29.1679	25.5344	140	Intron (uc001atv.3/55187, intron 67 of 69)	1	12567300	12567451	152	1	677882	uc001atz.1	-21211	ENSG00000266079	SNORA59B	small nucleolar RNA, H/ACA box 59B
chr1	12635271	12635508	238	*	CK6___lt__120_BAM_filter_on_data_707_peak_497	550	.	19.8726	59.4135	55.0492	165	Intron (uc001aub.3/9249, intron 4 of 5)	1	12640551	12656106	15556	2	9249	uc001aue.1	20598	ENSG00000162496	DHRS3	dehydrogenase/reductase 3
chr1	12664396	12664580	185	*	CK6___lt__120_BAM_filter_on_data_707_peak_499	167	.	11.2688	20.0801	16.7472	126	Intron (uc001aub.3/9249, intron 1 of 5)	1	12640551	12656106	15556	2	9249	uc001aue.1	-8290	ENSG00000162496	DHRS3	dehydrogenase/reductase 3
chr1	14075746	14075911	166	*	CK6___lt__120_BAM_filter_on_data_707_peak_518	97	.	7.88566	12.801	9.77309	104	Promoter (<=1kb)	1	14075856	14107358	31503	1	7799	uc021ogk.1	0	ENSG00000116731	PRDM2	PR/SET domain 2
chr1	14932408	14932746	339	*	CK6___lt__120_BAM_filter_on_data_707_peak_543	314	.	14.4366	35.2383	31.4324	170	Intron (uc009vog.1/23254, intron 1 of 7)	1	14925213	15444544	519332	1	23254	uc001avm.4	7195	ENSG00000189337	KAZN	kazrin, periplakin interacting protein
chr1	15116213	15116553	341	*	CK6___lt__120_BAM_filter_on_data_707_peak_547	661	.	23.7728	70.6976	66.131	173	Intron (uc009vog.1/23254, intron 1 of 7)	1	15250625	15394651	144027	1	23254	uc001avo.2	-134072	ENSG00000189337	KAZN	kazrin, periplakin interacting protein
chr1	15230425	15230800	376	*	CK6___lt__120_BAM_filter_on_data_707_peak_550	430	.	18.8794	47.1998	43.0938	206	Intron (uc009vog.1/23254, intron 1 of 7)	1	15250625	15394651	144027	1	23254	uc001avo.2	-19825	ENSG00000189337	KAZN	kazrin, periplakin interacting protein
chr1	15250529	15250674	146	*	CK6___lt__120_BAM_filter_on_data_707_peak_553	106	.	8.43117	13.7295	10.6567	61	Promoter (<=1kb)	1	15250625	15394651	144027	1	23254	uc001avo.2	0	ENSG00000189337	KAZN	kazrin, periplakin interacting protein
chr1	15294783	15295383	601	*	CK6___lt__120_BAM_filter_on_data_707_peak_557b	391	.	8.53411	43.1367	39.1252	216	Intron (uc009vog.1/23254, intron 2 of 7)	1	15287180	15394651	107472	1	23254	uc001avr.2	7603	ENSG00000189337	KAZN	kazrin, periplakin interacting protein
chr1	15294783	15295383	601	*	CK6___lt__120_BAM_filter_on_data_707_peak_557b	391	.	8.53411	43.1367	39.1252	216	Intron (uc009vog.1/23254, intron 2 of 7)	1	15287180	15394651	107472	1	23254	uc001avr.2	7603	ENSG00000189337	KAZN	kazrin, periplakin interacting protein
chr1	15294783	15295383	601	*	CK6___lt__120_BAM_filter_on_data_707_peak_557b	391	.	8.53411	43.1367	39.1252	216	Intron (uc009vog.1/23254, intron 2 of 7)	1	15287180	15394651	107472	1	23254	uc001avr.2	7603	ENSG00000189337	KAZN	kazrin, periplakin interacting protein
chr1	15294783	15295383	601	*	CK6___lt__120_BAM_filter_on_data_707_peak_557c	928	.	14.5182	97.8464	92.8557	384	Intron (uc009vog.1/23254, intron 2 of 7)	1	15287180	15394651	107472	1	23254	uc001avr.2	7603	ENSG00000189337	KAZN	kazrin, periplakin interacting protein
chr1	15294783	15295383	601	*	CK6___lt__120_BAM_filter_on_data_707_peak_557c	928	.	14.5182	97.8464	92.8557	384	Intron (uc009vog.1/23254, intron 2 of 7)	1	15287180	15394651	107472	1	23254	uc001avr.2	7603	ENSG00000189337	KAZN	kazrin, periplakin interacting protein
chr1	15294783	15295383	601	*	CK6___lt__120_BAM_filter_on_data_707_peak_557c	928	.	14.5182	97.8464	92.8557	384	Intron (uc009vog.1/23254, intron 2 of 7)	1	15287180	15394651	107472	1	23254	uc001avr.2	7603	ENSG00000189337	KAZN	kazrin, periplakin interacting protein
chr1	15296742	15296993	252	*	CK6___lt__120_BAM_filter_on_data_707_peak_558a	353	.	8.20015	39.2423	35.3299	66	Intron (uc009vog.1/23254, intron 2 of 7)	1	15287180	15394651	107472	1	23254	uc001avr.2	9562	ENSG00000189337	KAZN	kazrin, periplakin interacting protein
chr1	15296742	15296993	252	*	CK6___lt__120_BAM_filter_on_data_707_peak_558a	353	.	8.20015	39.2423	35.3299	66	Intron (uc009vog.1/23254, intron 2 of 7)	1	15287180	15394651	107472	1	23254	uc001avr.2	9562	ENSG00000189337	KAZN	kazrin, periplakin interacting protein
chr1	15358137	15358372	236	*	CK6___lt__120_BAM_filter_on_data_707_peak_560	140	.	10.0893	17.2754	14.0491	147	Intron (uc009vog.1/23254, intron 2 of 7)	1	15427704	15444544	16841	1	23254	uc001avs.4	-69332	ENSG00000189337	KAZN	kazrin, periplakin interacting protein
chr1	15358137	15358372	236	*	CK6___lt__120_BAM_filter_on_data_707_peak_560	140	.	10.0893	17.2754	14.0491	147	Intron (uc009vog.1/23254, intron 2 of 7)	1	15427704	15444544	16841	1	23254	uc001avs.4	-69332	ENSG00000189337	KAZN	kazrin, periplakin interacting protein
chr1	15438703	15439147	445	*	CK6___lt__120_BAM_filter_on_data_707_peak_561	195	.	11.5701	22.945	19.5098	194	Exon (uc001avm.4/23254, exon 14 of 15)	1	15427704	15444544	16841	1	23254	uc001avs.4	10999	ENSG00000189337	KAZN	kazrin, periplakin interacting protein
chr1	15438703	15439147	445	*	CK6___lt__120_BAM_filter_on_data_707_peak_561	195	.	11.5701	22.945	19.5098	194	Exon (uc001avm.4/23254, exon 14 of 15)	1	15427704	15444544	16841	1	23254	uc001avs.4	10999	ENSG00000189337	KAZN	kazrin, periplakin interacting protein
chr1	15455151	15455265	115	*	CK6___lt__120_BAM_filter_on_data_707_peak_562	140	.	10.2802	17.2677	14.0421	65	Intron (uc001avv.4/200197, intron 1 of 4)	1	15438311	15478960	40650	2	200197	uc001avv.4	23695	ENSG00000175147	TMEM51-AS1	TMEM51 antisense RNA 1
chr1	15478934	15479082	149	*	CK6___lt__120_BAM_filter_on_data_707_peak_563	104	.	7.08202	13.4831	10.4234	67	Promoter (<=1kb)	1	15438311	15478960	40650	2	200197	uc001avv.4	0	ENSG00000175147	TMEM51-AS1	TMEM51 antisense RNA 1
chr1	15482815	15483034	220	*	CK6___lt__120_BAM_filter_on_data_707_peak_565	98	.	6.73592	12.8901	9.85787	139	Promoter (2-3kb)	1	15480229	15546974	66746	1	55092	uc001avy.3	2586	ENSG00000171729	TMEM51	transmembrane protein 51
chr1	15498989	15499425	437	*	CK6___lt__120_BAM_filter_on_data_707_peak_566a	121	.	7.61554	15.2927	12.1505	217	Intron (uc001avw.4/55092, intron 1 of 3)	1	15480229	15546974	66746	1	55092	uc001avy.3	18760	ENSG00000171729	TMEM51	transmembrane protein 51
chr1	15498989	15499425	437	*	CK6___lt__120_BAM_filter_on_data_707_peak_566a	121	.	7.61554	15.2927	12.1505	217	Intron (uc001avw.4/55092, intron 1 of 3)	1	15480229	15546974	66746	1	55092	uc001avy.3	18760	ENSG00000171729	TMEM51	transmembrane protein 51
chr1	15498989	15499425	437	*	CK6___lt__120_BAM_filter_on_data_707_peak_566b	154	.	8.73989	18.7104	15.4286	343	Intron (uc001avw.4/55092, intron 1 of 3)	1	15480229	15546974	66746	1	55092	uc001avy.3	18760	ENSG00000171729	TMEM51	transmembrane protein 51
chr1	15498989	15499425	437	*	CK6___lt__120_BAM_filter_on_data_707_peak_566b	154	.	8.73989	18.7104	15.4286	343	Intron (uc001avw.4/55092, intron 1 of 3)	1	15480229	15546974	66746	1	55092	uc001avy.3	18760	ENSG00000171729	TMEM51	transmembrane protein 51
chr1	15506575	15507187	613	*	CK6___lt__120_BAM_filter_on_data_707_peak_568a	1063	.	14.5258	111.486	106.309	128	Intron (uc001avw.4/55092, intron 1 of 3)	1	15480229	15546974	66746	1	55092	uc001avy.3	26346	ENSG00000171729	TMEM51	transmembrane protein 51
chr1	15506575	15507187	613	*	CK6___lt__120_BAM_filter_on_data_707_peak_568a	1063	.	14.5258	111.486	106.309	128	Intron (uc001avw.4/55092, intron 1 of 3)	1	15480229	15546974	66746	1	55092	uc001avy.3	26346	ENSG00000171729	TMEM51	transmembrane protein 51
chr1	15506575	15507187	613	*	CK6___lt__120_BAM_filter_on_data_707_peak_568b	1872	.	21.1798	193.246	187.271	387	Intron (uc001avw.4/55092, intron 1 of 3)	1	15480229	15546974	66746	1	55092	uc001avy.3	26346	ENSG00000171729	TMEM51	transmembrane protein 51
chr1	15506575	15507187	613	*	CK6___lt__120_BAM_filter_on_data_707_peak_568b	1872	.	21.1798	193.246	187.271	387	Intron (uc001avw.4/55092, intron 1 of 3)	1	15480229	15546974	66746	1	55092	uc001avy.3	26346	ENSG00000171729	TMEM51	transmembrane protein 51
chr1	15544919	15545341	423	*	CK6___lt__120_BAM_filter_on_data_707_peak_572	640	.	20.6917	68.6015	64.0719	186	Intron (uc001avw.4/55092, intron 3 of 3)	1	15573768	15672019	98252	1	114827	uc001awa.1	-28427	ENSG00000142621	FHAD1	forkhead associated phosphopeptide binding domain 1
chr1	15544919	15545341	423	*	CK6___lt__120_BAM_filter_on_data_707_peak_572	640	.	20.6917	68.6015	64.0719	186	Intron (uc001avw.4/55092, intron 3 of 3)	1	15573768	15672019	98252	1	114827	uc001awa.1	-28427	ENSG00000142621	FHAD1	forkhead associated phosphopeptide binding domain 1
chr1	15587081	15587509	429	*	CK6___lt__120_BAM_filter_on_data_707_peak_576a	640	.	16.7212	68.6153	64.0854	145	Intron (uc001awa.1/114827, intron 2 of 15)	1	15573768	15724622	150855	1	114827	uc001awb.2	13313	ENSG00000142621	FHAD1	forkhead associated phosphopeptide binding domain 1
chr1	15587081	15587509	429	*	CK6___lt__120_BAM_filter_on_data_707_peak_576a	640	.	16.7212	68.6153	64.0854	145	Intron (uc001awa.1/114827, intron 2 of 15)	1	15573768	15724622	150855	1	114827	uc001awb.2	13313	ENSG00000142621	FHAD1	forkhead associated phosphopeptide binding domain 1
chr1	15587081	15587509	429	*	CK6___lt__120_BAM_filter_on_data_707_peak_576b	475	.	13.7435	51.7327	47.5233	270	Intron (uc001awa.1/114827, intron 2 of 15)	1	15573768	15724622	150855	1	114827	uc001awb.2	13313	ENSG00000142621	FHAD1	forkhead associated phosphopeptide binding domain 1
chr1	15587081	15587509	429	*	CK6___lt__120_BAM_filter_on_data_707_peak_576b	475	.	13.7435	51.7327	47.5233	270	Intron (uc001awa.1/114827, intron 2 of 15)	1	15573768	15724622	150855	1	114827	uc001awb.2	13313	ENSG00000142621	FHAD1	forkhead associated phosphopeptide binding domain 1
chr1	15587790	15587911	122	*	CK6___lt__120_BAM_filter_on_data_707_peak_577	148	.	6.88987	18.0631	14.8062	72	Intron (uc001awa.1/114827, intron 2 of 15)	1	15573768	15724622	150855	1	114827	uc001awb.2	14022	ENSG00000142621	FHAD1	forkhead associated phosphopeptide binding domain 1
chr1	15622303	15622785	483	*	CK6___lt__120_BAM_filter_on_data_707_peak_580a	465	.	16.4708	50.6882	46.5021	113	Intron (uc001awa.1/114827, intron 4 of 15)	1	15668232	15711054	42823	1	114827	uc001awd.1	-45447	ENSG00000142621	FHAD1	forkhead associated phosphopeptide binding domain 1
chr1	15622303	15622785	483	*	CK6___lt__120_BAM_filter_on_data_707_peak_580a	465	.	16.4708	50.6882	46.5021	113	Intron (uc001awa.1/114827, intron 4 of 15)	1	15668232	15711054	42823	1	114827	uc001awd.1	-45447	ENSG00000142621	FHAD1	forkhead associated phosphopeptide binding domain 1
chr1	15622303	15622785	483	*	CK6___lt__120_BAM_filter_on_data_707_peak_580a	465	.	16.4708	50.6882	46.5021	113	Intron (uc001awa.1/114827, intron 4 of 15)	1	15668232	15711054	42823	1	114827	uc001awd.1	-45447	ENSG00000142621	FHAD1	forkhead associated phosphopeptide binding domain 1
chr1	15622303	15622785	483	*	CK6___lt__120_BAM_filter_on_data_707_peak_580b	308	.	12.5953	34.6593	30.8683	238	Intron (uc001awa.1/114827, intron 4 of 15)	1	15668232	15711054	42823	1	114827	uc001awd.1	-45447	ENSG00000142621	FHAD1	forkhead associated phosphopeptide binding domain 1
chr1	15622303	15622785	483	*	CK6___lt__120_BAM_filter_on_data_707_peak_580b	308	.	12.5953	34.6593	30.8683	238	Intron (uc001awa.1/114827, intron 4 of 15)	1	15668232	15711054	42823	1	114827	uc001awd.1	-45447	ENSG00000142621	FHAD1	forkhead associated phosphopeptide binding domain 1
chr1	15622303	15622785	483	*	CK6___lt__120_BAM_filter_on_data_707_peak_580b	308	.	12.5953	34.6593	30.8683	238	Intron (uc001awa.1/114827, intron 4 of 15)	1	15668232	15711054	42823	1	114827	uc001awd.1	-45447	ENSG00000142621	FHAD1	forkhead associated phosphopeptide binding domain 1
chr1	15705833	15706001	169	*	CK6___lt__120_BAM_filter_on_data_707_peak_582	112	.	8.76465	14.3153	11.216	145	Promoter (1-2kb)	1	15707197	15726778	19582	1	114827	uc001awg.3	-1196	ENSG00000142621	FHAD1	forkhead associated phosphopeptide binding domain 1
chr1	15736258	15736406	149	*	CK6___lt__120_BAM_filter_on_data_707_peak_583	218	.	13.295	25.3688	21.8522	56	Promoter (<=1kb)	1	15736391	15756839	20449	1	79180	uc001awh.2	0	ENSG00000142634	EFHD2	EF-hand domain family member D2
chr1	15749825	15750051	227	*	CK6___lt__120_BAM_filter_on_data_707_peak_584	303	.	16.1259	34.118	30.3422	137	Intron (uc001awh.2/79180, intron 1 of 3)	1	15736391	15756839	20449	1	79180	uc001awh.2	13434	ENSG00000142634	EFHD2	EF-hand domain family member D2
chr1	15850902	15851138	237	*	CK6___lt__120_BAM_filter_on_data_707_peak_589a	333	.	9.96981	37.2081	33.3488	169	Promoter (<=1kb)	1	15817324	15850940	33617	2	842	uc001awm.2	0	ENSG00000132906	CASP9	caspase 9
chr1	15851307	15851644	338	*	CK6___lt__120_BAM_filter_on_data_707_peak_589a	333	.	9.96981	37.2081	33.3488	169	Promoter (<=1kb)	1	15817896	15851285	33390	2	842	uc010obm.3	-22	ENSG00000132906	CASP9	caspase 9
chr1	15851307	15851644	338	*	CK6___lt__120_BAM_filter_on_data_707_peak_589a	333	.	9.96981	37.2081	33.3488	169	Promoter (<=1kb)	1	15817896	15851285	33390	2	842	uc010obm.3	-22	ENSG00000132906	CASP9	caspase 9
chr1	15850902	15851138	237	*	CK6___lt__120_BAM_filter_on_data_707_peak_589b	354	.	10.3305	39.3575	35.4418	564	Promoter (<=1kb)	1	15817324	15850940	33617	2	842	uc001awm.2	0	ENSG00000132906	CASP9	caspase 9
chr1	15851307	15851644	338	*	CK6___lt__120_BAM_filter_on_data_707_peak_589b	354	.	10.3305	39.3575	35.4418	564	Promoter (<=1kb)	1	15817896	15851285	33390	2	842	uc010obm.3	-22	ENSG00000132906	CASP9	caspase 9
chr1	15851307	15851644	338	*	CK6___lt__120_BAM_filter_on_data_707_peak_589b	354	.	10.3305	39.3575	35.4418	564	Promoter (<=1kb)	1	15817896	15851285	33390	2	842	uc010obm.3	-22	ENSG00000132906	CASP9	caspase 9
chr1	15850902	15851138	237	*	CK6___lt__120_BAM_filter_on_data_707_peak_589c	343	.	10.1392	38.2505	34.3641	731	Promoter (<=1kb)	1	15817324	15850940	33617	2	842	uc001awm.2	0	ENSG00000132906	CASP9	caspase 9
chr1	15851307	15851644	338	*	CK6___lt__120_BAM_filter_on_data_707_peak_589c	343	.	10.1392	38.2505	34.3641	731	Promoter (<=1kb)	1	15817896	15851285	33390	2	842	uc010obm.3	-22	ENSG00000132906	CASP9	caspase 9
chr1	15851307	15851644	338	*	CK6___lt__120_BAM_filter_on_data_707_peak_589c	343	.	10.1392	38.2505	34.3641	731	Promoter (<=1kb)	1	15817896	15851285	33390	2	842	uc010obm.3	-22	ENSG00000132906	CASP9	caspase 9
chr1	15853030	15853305	276	*	CK6___lt__120_BAM_filter_on_data_707_peak_590b	176	.	6.96352	21.0056	17.6389	234	Promoter (<=1kb)	1	15853352	15893091	39740	1	23341	uc001awr.1	-47	ENSG00000116138	DNAJC16	DnaJ heat shock protein family (Hsp40) member C16
chr1	15943680	15944016	337	*	CK6___lt__120_BAM_filter_on_data_707_peak_595	362	.	15.2357	40.1614	36.2257	256	Promoter (<=1kb)	1	15943953	15960796	16844	1	84301	uc001aww.3	0	ENSG00000197312	DDI2	DNA damage inducible 1 homolog 2
chr1	15953892	15954246	355	*	CK6___lt__120_BAM_filter_on_data_707_peak_596	158	.	10.465	19.1034	15.8059	284	Promoter (2-3kb)	1	15956820	15987552	30733	1	84301	uc009voj.2	-2574	ENSG00000197312	DDI2	DNA damage inducible 1 homolog 2
chr1	16030152	16030331	180	*	CK6___lt__120_BAM_filter_on_data_707_peak_600	199	.	12.1558	23.4022	19.9507	155	Intron (uc010obo.2/23207, intron 1 of 19)	1	16010827	16061264	50438	1	23207	uc010obo.2	19325	ENSG00000116786	PLEKHM2	pleckstrin homology and RUN domain containing M2
chr1	16158673	16158823	151	*	CK6___lt__120_BAM_filter_on_data_707_peak_604	258	.	10.3038	29.5368	25.8927	61	Downstream (1-2kb)	1	16174359	16266950	92592	1	23013	uc001axk.1	-15536	ENSG00000065526	SPEN	spen family transcriptional repressor
chr1	16162375	16162564	190	*	CK6___lt__120_BAM_filter_on_data_707_peak_606	182	.	8.37961	21.6796	18.2893	84	Exon (uc001axj.2/729614, exon 2 of 2)	1	16174359	16266950	92592	1	23013	uc001axk.1	-11795	ENSG00000065526	SPEN	spen family transcriptional repressor
chr1	16291925	16292244	320	*	CK6___lt__120_BAM_filter_on_data_707_peak_609a	164	.	10.8423	19.7427	16.4221	82	Intron (uc001axl.4/7709, intron 2 of 15)	1	16268364	16302627	34264	2	7709	uc001axl.4	10383	ENSG00000116809	ZBTB17	zinc finger and BTB domain containing 17
chr1	16302558	16302694	137	*	CK6___lt__120_BAM_filter_on_data_707_peak_610	214	.	13.3388	25.0036	21.4993	56	Promoter (<=1kb)	1	16268364	16302627	34264	2	7709	uc001axl.4	0	ENSG00000116809	ZBTB17	zinc finger and BTB domain containing 17
chr1	16533048	16533299	252	*	CK6___lt__120_BAM_filter_on_data_707_peak_617	231	.	13.1857	26.757	23.1961	111	Promoter (<=1kb)	1	16524599	16533705	9107	2	128272	uc009voo.2	406	ENSG00000142632	ARHGEF19	Rho guanine nucleotide exchange factor 19
chr1	16563662	16563772	111	*	CK6___lt__120_BAM_filter_on_data_707_peak_619	126	.	9.45871	15.8381	12.6715	68	Promoter (<=1kb)	1	16558182	16563659	5478	2	79363	uc001ayd.3	-3	ENSG00000132881	RSG1	REM2 and RAB like small GTPase 1
chr1	16587569	16587697	129	*	CK6___lt__120_BAM_filter_on_data_707_peak_621	83	.	7.40546	11.2528	8.30295	75	Intron (uc001ayf.3/54455, intron 5 of 10)	1	16558182	16563659	5478	2	79363	uc001ayd.3	-23910	ENSG00000132881	RSG1	REM2 and RAB like small GTPase 1
chr1	16675519	16675682	164	*	CK6___lt__120_BAM_filter_on_data_707_peak_624	134	.	9.26909	16.661	13.4598	104	Intron (uc001ayg.3/54455, intron 1 of 9)	1	16576559	16678948	102390	2	54455	uc001ayg.3	3266	ENSG00000037637	FBXO42	F-box protein 42
chr1	16678967	16679127	161	*	CK6___lt__120_BAM_filter_on_data_707_peak_625	82	.	6.88355	11.1562	8.212	55	Promoter (<=1kb)	1	16576559	16678948	102390	2	54455	uc001ayg.3	-19	ENSG00000037637	FBXO42	F-box protein 42
chr1	16693449	16693700	252	*	CK6___lt__120_BAM_filter_on_data_707_peak_626	322	.	14.5391	36.1059	32.276	164	Promoter (<=1kb)	1	16693525	16722607	29083	1	26099	uc010ocb.2	0	ENSG00000055070	SZRD1	SUZ RNA binding domain containing 1
chr1	16713374	16713643	270	*	CK6___lt__120_BAM_filter_on_data_707_peak_628	195	.	11.8916	22.9559	19.5198	193	Intron (uc010ocb.2/26099, intron 1 of 3)	1	16693525	16724643	31119	1	26099	uc031plh.1	19849	ENSG00000055070	SZRD1	SUZ RNA binding domain containing 1
chr1	16713374	16713643	270	*	CK6___lt__120_BAM_filter_on_data_707_peak_628	195	.	11.8916	22.9559	19.5198	193	Intron (uc010ocb.2/26099, intron 1 of 3)	1	16693525	16724643	31119	1	26099	uc031plh.1	19849	ENSG00000055070	SZRD1	SUZ RNA binding domain containing 1
chr1	16766998	16767160	163	*	CK6___lt__120_BAM_filter_on_data_707_peak_629	148	.	10.5477	18.117	14.8576	272	Promoter (<=1kb)	1	16767167	16786584	19418	1	55707	uc001ayo.3	-7	ENSG00000157191	NECAP2	NECAP endocytosis associated 2
chr1	16940000	16940145	146	*	CK6___lt__120_BAM_filter_on_data_707_peak_640	92	.	7.08645	12.2397	9.23919	83	Promoter (<=1kb)	1	16888922	16940100	51179	2	55672	uc001ayw.4	0	ENSG00000219481	NBPF1	NBPF member 1
chr1	16947511	16947777	267	*	CK6___lt__120_BAM_filter_on_data_707_peak_641	347	.	13.6401	38.6779	34.7807	242	Intron (uc010ocf.2/84809, intron 2 of 3)	1	16944751	16952994	8244	2	84809	uc010ocf.2	5217	ENSG00000215908	CROCCP2	ciliary rootlet coiled-coil, rootletin pseudogene 2
chr1	16971170	16971423	254	*	CK6___lt__120_BAM_filter_on_data_707_peak_642	170	.	10.6563	20.382	17.0378	59	Promoter (<=1kb)	1	16951873	16971178	19306	2	84809	uc001azg.1	0	ENSG00000215908	CROCCP2	ciliary rootlet coiled-coil, rootletin pseudogene 2
chr1	17027739	17027974	236	*	CK6___lt__120_BAM_filter_on_data_707_peak_649b	90	.	7.42902	12.0445	9.05276	165	Intron (uc001azn.1/284729, intron 6 of 10)	1	17017713	17046652	28940	2	284729	uc001azn.1	18678	ENSG00000268869	ESPNP	espin pseudogene
chr1	17066612	17066794	183	*	CK6___lt__120_BAM_filter_on_data_707_peak_651	421	.	11.7654	46.2399	42.156	90	Promoter (<=1kb)	1	17066768	17267729	200962	1	9696	uc009voy.1	0	ENSG00000058453	CROCC	ciliary rootlet coiled-coil, rootletin
chr1	17067147	17067707	561	*	CK6___lt__120_BAM_filter_on_data_707_peak_652b	279	.	9.18351	31.7035	27.9959	348	Promoter (<=1kb)	1	17066768	17267729	200962	1	9696	uc009voy.1	379	ENSG00000058453	CROCC	ciliary rootlet coiled-coil, rootletin
chr1	17067147	17067707	561	*	CK6___lt__120_BAM_filter_on_data_707_peak_652b	279	.	9.18351	31.7035	27.9959	348	Promoter (<=1kb)	1	17066768	17267729	200962	1	9696	uc009voy.1	379	ENSG00000058453	CROCC	ciliary rootlet coiled-coil, rootletin
chr1	17067147	17067707	561	*	CK6___lt__120_BAM_filter_on_data_707_peak_652b	279	.	9.18351	31.7035	27.9959	348	Promoter (<=1kb)	1	17066768	17267729	200962	1	9696	uc009voy.1	379	ENSG00000058453	CROCC	ciliary rootlet coiled-coil, rootletin
chr1	17067147	17067707	561	*	CK6___lt__120_BAM_filter_on_data_707_peak_652c	103	.	5.39032	13.4294	10.3723	527	Promoter (<=1kb)	1	17066768	17267729	200962	1	9696	uc009voy.1	379	ENSG00000058453	CROCC	ciliary rootlet coiled-coil, rootletin
chr1	17067147	17067707	561	*	CK6___lt__120_BAM_filter_on_data_707_peak_652c	103	.	5.39032	13.4294	10.3723	527	Promoter (<=1kb)	1	17066768	17267729	200962	1	9696	uc009voy.1	379	ENSG00000058453	CROCC	ciliary rootlet coiled-coil, rootletin
chr1	17067147	17067707	561	*	CK6___lt__120_BAM_filter_on_data_707_peak_652c	103	.	5.39032	13.4294	10.3723	527	Promoter (<=1kb)	1	17066768	17267729	200962	1	9696	uc009voy.1	379	ENSG00000058453	CROCC	ciliary rootlet coiled-coil, rootletin
chr1	17122941	17123286	346	*	CK6___lt__120_BAM_filter_on_data_707_peak_654a	334	.	14.0553	37.3443	33.4813	102	Intron (uc009voy.1/9696, intron 1 of 8)	1	17081129	17090975	9847	2	11223	uc010ock.3	-31966	NA	MST1L	macrophage stimulating 1 like
chr1	17122941	17123286	346	*	CK6___lt__120_BAM_filter_on_data_707_peak_654b	296	.	13.0281	33.4477	29.6909	263	Intron (uc009voy.1/9696, intron 1 of 8)	1	17081129	17090975	9847	2	11223	uc010ock.3	-31966	NA	MST1L	macrophage stimulating 1 like
chr1	17222613	17223160	548	*	CK6___lt__120_BAM_filter_on_data_707_peak_659b	699	.	15.6234	74.543	69.912	289	Exon (uc021ohi.1/uc021ohi.1, exon 1 of 1)	1	17248445	17299474	51030	1	9696	uc001azt.2	-25285	ENSG00000058453	CROCC	ciliary rootlet coiled-coil, rootletin
chr1	17222613	17223160	548	*	CK6___lt__120_BAM_filter_on_data_707_peak_659b	699	.	15.6234	74.543	69.912	289	Exon (uc021ohi.1/uc021ohi.1, exon 1 of 1)	1	17248445	17299474	51030	1	9696	uc001azt.2	-25285	ENSG00000058453	CROCC	ciliary rootlet coiled-coil, rootletin
chr1	17222613	17223160	548	*	CK6___lt__120_BAM_filter_on_data_707_peak_659c	152	.	6.32374	18.5146	15.24	497	Exon (uc021ohi.1/uc021ohi.1, exon 1 of 1)	1	17248445	17299474	51030	1	9696	uc001azt.2	-25285	ENSG00000058453	CROCC	ciliary rootlet coiled-coil, rootletin
chr1	17222613	17223160	548	*	CK6___lt__120_BAM_filter_on_data_707_peak_659c	152	.	6.32374	18.5146	15.24	497	Exon (uc021ohi.1/uc021ohi.1, exon 1 of 1)	1	17248445	17299474	51030	1	9696	uc001azt.2	-25285	ENSG00000058453	CROCC	ciliary rootlet coiled-coil, rootletin
chr1	17231329	17231468	140	*	CK6___lt__120_BAM_filter_on_data_707_peak_660	122	.	4.69194	15.3694	12.2224	60	Intron (uc009voy.1/9696, intron 1 of 8)	1	17248445	17299474	51030	1	9696	uc001azt.2	-16977	ENSG00000058453	CROCC	ciliary rootlet coiled-coil, rootletin
chr1	17231764	17232286	523	*	CK6___lt__120_BAM_filter_on_data_707_peak_661	1345	.	18.5833	140.089	134.598	228	Intron (uc009voy.1/9696, intron 1 of 8)	1	17248445	17299474	51030	1	9696	uc001azt.2	-16159	ENSG00000058453	CROCC	ciliary rootlet coiled-coil, rootletin
chr1	17240341	17240702	362	*	CK6___lt__120_BAM_filter_on_data_707_peak_662	396	.	15.1807	43.7178	39.6924	134	Intron (uc009voy.1/9696, intron 1 of 8)	1	17248445	17299474	51030	1	9696	uc001azt.2	-7743	ENSG00000058453	CROCC	ciliary rootlet coiled-coil, rootletin
chr1	17278318	17278429	112	*	CK6___lt__120_BAM_filter_on_data_707_peak_665	304	.	17.14	34.2728	30.4925	119	Intron (uc001azt.2/9696, intron 20 of 36)	1	17266389	17299474	33086	1	9696	uc001azu.2	11929	ENSG00000058453	CROCC	ciliary rootlet coiled-coil, rootletin
chr1	17308126	17308284	159	*	CK6___lt__120_BAM_filter_on_data_707_peak_667	189	.	11.8669	22.4152	18.9982	119	Promoter (<=1kb)	1	17300999	17308081	7083	2	4237	uc010ocl.2	-45	ENSG00000117122	MFAP2	microfibril associated protein 2
chr1	17342454	17342771	318	*	CK6___lt__120_BAM_filter_on_data_707_peak_668	370	.	14.506	41.0066	37.0489	185	Downstream (2-3kb)	1	17312453	17338423	25971	2	23400	uc001bac.2	-4031	ENSG00000159363	ATP13A2	ATPase 13A2
chr1	17342454	17342771	318	*	CK6___lt__120_BAM_filter_on_data_707_peak_668	370	.	14.506	41.0066	37.0489	185	Downstream (2-3kb)	1	17312453	17338423	25971	2	23400	uc001bac.2	-4031	ENSG00000159363	ATP13A2	ATPase 13A2
chr1	17342454	17342771	318	*	CK6___lt__120_BAM_filter_on_data_707_peak_668	370	.	14.506	41.0066	37.0489	185	Downstream (2-3kb)	1	17312453	17338423	25971	2	23400	uc001bac.2	-4031	ENSG00000159363	ATP13A2	ATPase 13A2
chr1	17342454	17342771	318	*	CK6___lt__120_BAM_filter_on_data_707_peak_668	370	.	14.506	41.0066	37.0489	185	Downstream (2-3kb)	1	17312453	17338423	25971	2	23400	uc001bac.2	-4031	ENSG00000159363	ATP13A2	ATPase 13A2
chr1	17380527	17380904	378	*	CK6___lt__120_BAM_filter_on_data_707_peak_673	895	.	22.4292	94.5246	89.5782	129	Promoter (<=1kb)	1	17345225	17380665	35441	2	6390	uc001bae.3	0	ENSG00000117118	SDHB	succinate dehydrogenase complex iron sulfur subunit B
chr1	17416066	17416512	447	*	CK6___lt__120_BAM_filter_on_data_707_peak_675	1399	.	25.7264	145.494	139.948	175	Intron (uc001baf.3/11240, intron 6 of 15)	1	17393256	17445948	52693	2	11240	uc001baf.3	29436	ENSG00000117115	PADI2	peptidyl arginine deiminase 2
chr1	17436487	17436647	161	*	CK6___lt__120_BAM_filter_on_data_707_peak_676	180	.	12.1251	21.4432	18.0604	83	Intron (uc001baf.3/11240, intron 1 of 15)	1	17393256	17445948	52693	2	11240	uc001baf.3	9301	ENSG00000117115	PADI2	peptidyl arginine deiminase 2
chr1	17560376	17560584	209	*	CK6___lt__120_BAM_filter_on_data_707_peak_680	192	.	11.4379	22.7249	19.297	82	Promoter (<=1kb)	1	17559776	17572501	12726	1	29943	uc010ocq.1	600	ENSG00000142623	PADI1	peptidyl arginine deiminase 1
chr1	17718853	17719169	317	*	CK6___lt__120_BAM_filter_on_data_707_peak_686	243	.	13.9016	27.969	24.3712	204	Intron (uc001bak.1/353238, intron 10 of 16)	1	17698741	17728195	29455	1	353238	uc001bak.1	20112	ENSG00000276747	PADI6	peptidyl arginine deiminase 6
chr1	17738124	17738468	345	*	CK6___lt__120_BAM_filter_on_data_707_peak_687	455	.	18.5175	49.6932	45.5303	150	Intron (uc001bal.3/55920, intron 10 of 11)	1	17733251	17765059	31809	2	55920	uc001bal.3	26591	ENSG00000179051	RCC2	regulator of chromosome condensation 2
chr1	17738124	17738468	345	*	CK6___lt__120_BAM_filter_on_data_707_peak_687	455	.	18.5175	49.6932	45.5303	150	Intron (uc001bal.3/55920, intron 10 of 11)	1	17733251	17765059	31809	2	55920	uc001bal.3	26591	ENSG00000179051	RCC2	regulator of chromosome condensation 2
chr1	17858195	17858445	251	*	CK6___lt__120_BAM_filter_on_data_707_peak_694	132	.	9.42302	16.4903	13.2959	217	Intron (uc031pli.1/55160, intron 1 of 1)	1	17866330	18016673	150344	1	55160	uc009vpe.1	-7885	ENSG00000074964	ARHGEF10L	Rho guanine nucleotide exchange factor 10 like
chr1	17864969	17865163	195	*	CK6___lt__120_BAM_filter_on_data_707_peak_695	112	.	8.92451	14.3704	11.2682	111	Promoter (1-2kb)	1	17866330	18016673	150344	1	55160	uc009vpe.1	-1167	ENSG00000074964	ARHGEF10L	Rho guanine nucleotide exchange factor 10 like
chr1	17896299	17896508	210	*	CK6___lt__120_BAM_filter_on_data_707_peak_697	373	.	18.0232	41.321	37.3556	117	Intron (uc031pli.1/55160, intron 1 of 1)	1	17907048	18024370	117323	1	55160	uc001bao.3	-10540	ENSG00000074964	ARHGEF10L	Rho guanine nucleotide exchange factor 10 like
chr1	17896299	17896508	210	*	CK6___lt__120_BAM_filter_on_data_707_peak_697	373	.	18.0232	41.321	37.3556	117	Intron (uc031pli.1/55160, intron 1 of 1)	1	17907048	18024370	117323	1	55160	uc001bao.3	-10540	ENSG00000074964	ARHGEF10L	Rho guanine nucleotide exchange factor 10 like
chr1	18008943	18009119	177	*	CK6___lt__120_BAM_filter_on_data_707_peak_701	144	.	10.442	17.6942	14.4516	142	Intron (uc009vpe.1/55160, intron 25 of 26)	1	18020542	18024370	3829	1	55160	uc001bas.3	-11423	ENSG00000074964	ARHGEF10L	Rho guanine nucleotide exchange factor 10 like
chr1	19229290	19229485	196	*	CK6___lt__120_BAM_filter_on_data_707_peak_723	299	.	15.1565	33.7578	29.9925	88	Promoter (<=1kb)	1	19197924	19229293	31370	2	8659	uc001bbb.3	0	ENSG00000159423	ALDH4A1	aldehyde dehydrogenase 4 family member A1
chr1	19234038	19234166	129	*	CK6___lt__120_BAM_filter_on_data_707_peak_724	94	.	7.48086	12.4917	9.47858	56	3' UTR	1	19197924	19229293	31370	2	8659	uc021ohl.1	-4745	ENSG00000159423	ALDH4A1	aldehyde dehydrogenase 4 family member A1
chr1	19253018	19253348	331	*	CK6___lt__120_BAM_filter_on_data_707_peak_725a	102	.	8.31806	13.2657	10.2154	95	Intron (uc001bbd.2/126917, intron 1 of 8)	1	19197924	19229293	31370	2	8659	uc021ohl.1	-23725	ENSG00000159423	ALDH4A1	aldehyde dehydrogenase 4 family member A1
chr1	19253018	19253348	331	*	CK6___lt__120_BAM_filter_on_data_707_peak_725b	216	.	13.4369	25.1831	21.6727	264	Intron (uc001bbd.2/126917, intron 1 of 8)	1	19197924	19229293	31370	2	8659	uc021ohl.1	-23725	ENSG00000159423	ALDH4A1	aldehyde dehydrogenase 4 family member A1
chr1	19267881	19268006	126	*	CK6___lt__120_BAM_filter_on_data_707_peak_726	103	.	8.45501	13.3782	10.3225	133	Intron (uc001bbd.2/126917, intron 1 of 8)	1	19230774	19282826	52053	2	126917	uc001bbd.2	14820	ENSG00000169991	IFFO2	intermediate filament family orphan 2
chr1	19281268	19281520	253	*	CK6___lt__120_BAM_filter_on_data_707_peak_727a	112	.	7.87212	14.3651	11.2644	80	Promoter (1-2kb)	1	19230774	19282826	52053	2	126917	uc001bbd.2	1306	ENSG00000169991	IFFO2	intermediate filament family orphan 2
chr1	19281268	19281520	253	*	CK6___lt__120_BAM_filter_on_data_707_peak_727b	220	.	11.8082	25.6208	22.0963	191	Promoter (1-2kb)	1	19230774	19282826	52053	2	126917	uc001bbd.2	1306	ENSG00000169991	IFFO2	intermediate filament family orphan 2
chr1	19283181	19283359	179	*	CK6___lt__120_BAM_filter_on_data_707_peak_728	172	.	10.1609	20.601	17.2489	139	Promoter (<=1kb)	1	19230774	19282826	52053	2	126917	uc001bbd.2	-355	ENSG00000169991	IFFO2	intermediate filament family orphan 2
chr1	19526662	19526944	283	*	CK6___lt__120_BAM_filter_on_data_707_peak_737	211	.	12.2861	24.687	21.1928	122	Intron (uc001bbi.3/23352, intron 2 of 105)	1	19401000	19536746	135747	2	23352	uc001bbi.3	9802	ENSG00000127481	UBR4	ubiquitin protein ligase E3 component n-recognin 4
chr1	19638614	19638840	227	*	CK6___lt__120_BAM_filter_on_data_707_peak_741	518	.	20.4046	56.1985	51.8965	102	Promoter (<=1kb)	1	19638740	19655794	17055	1	54896	uc001bby.3	0	ENSG00000040487	PQLC2	PQ loop repeat containing 2
chr1	19751504	19751661	158	*	CK6___lt__120_BAM_filter_on_data_707_peak_744	154	.	9.05774	18.7441	15.4614	219	Intron (uc010ocz.2/832, intron 1 of 8)	1	19665267	19811201	145935	2	832	uc010ocz.2	59540	ENSG00000077549	CAPZB	capping actin protein of muscle Z-line beta subunit
chr1	19756784	19756924	141	*	CK6___lt__120_BAM_filter_on_data_707_peak_746	122	.	7.6474	15.3478	12.202	90	Intron (uc010ocz.2/832, intron 1 of 8)	1	19665267	19811201	145935	2	832	uc010ocz.2	54277	ENSG00000077549	CAPZB	capping actin protein of muscle Z-line beta subunit
chr1	19760213	19760315	103	*	CK6___lt__120_BAM_filter_on_data_707_peak_747	108	.	7.62319	13.9547	10.8721	80	Intron (uc010ocz.2/832, intron 1 of 8)	1	19665267	19811201	145935	2	832	uc010ocz.2	50886	ENSG00000077549	CAPZB	capping actin protein of muscle Z-line beta subunit
chr1	19796316	19796440	125	*	CK6___lt__120_BAM_filter_on_data_707_peak_750	86	.	7.59671	11.6152	8.64584	64	Intron (uc010ocz.2/832, intron 1 of 8)	1	19665267	19811201	145935	2	832	uc010ocz.2	14761	ENSG00000077549	CAPZB	capping actin protein of muscle Z-line beta subunit
chr1	19812022	19812317	296	*	CK6___lt__120_BAM_filter_on_data_707_peak_751	208	.	11.7607	24.3745	20.8908	95	Promoter (<=1kb)	1	19665267	19812066	146800	2	832	uc001bce.3	0	ENSG00000077549	CAPZB	capping actin protein of muscle Z-line beta subunit
chr1	19812022	19812317	296	*	CK6___lt__120_BAM_filter_on_data_707_peak_751	208	.	11.7607	24.3745	20.8908	95	Promoter (<=1kb)	1	19665267	19812066	146800	2	832	uc001bce.3	0	ENSG00000077549	CAPZB	capping actin protein of muscle Z-line beta subunit
chr1	19933356	19933566	211	*	CK6___lt__120_BAM_filter_on_data_707_peak_758	107	.	8.4899	13.8315	10.7544	155	Promoter (<=1kb)	1	19934301	19935138	838	1	644068	uc021ohx.2	-735	NA	RPS14P3	ribosomal protein S14 pseudogene 3
chr1	19959609	19960030	422	*	CK6___lt__120_BAM_filter_on_data_707_peak_760	510	.	16.8655	55.3702	51.0849	402	Intron (uc009vpl.2/100532736, intron 1 of 3)	1	19969723	19984949	15227	1	4681	uc001bcj.2	-9693	ENSG00000158747	NBL1	neuroblastoma 1, DAN family BMP antagonist
chr1	19959609	19960030	422	*	CK6___lt__120_BAM_filter_on_data_707_peak_760	510	.	16.8655	55.3702	51.0849	402	Intron (uc009vpl.2/100532736, intron 1 of 3)	1	19969723	19984949	15227	1	4681	uc001bcj.2	-9693	ENSG00000158747	NBL1	neuroblastoma 1, DAN family BMP antagonist
chr1	20042140	20042362	223	*	CK6___lt__120_BAM_filter_on_data_707_peak_765	257	.	13.6898	29.3832	25.7436	143	Intron (uc001bcn.3/255104, intron 13 of 15)	1	19991780	20006055	14276	1	3362	uc001bcl.3	50360	ENSG00000158748	HTR6	5-hydroxytryptamine receptor 6
chr1	20042140	20042362	223	*	CK6___lt__120_BAM_filter_on_data_707_peak_765	257	.	13.6898	29.3832	25.7436	143	Intron (uc001bcn.3/255104, intron 13 of 15)	1	19991780	20006055	14276	1	3362	uc001bcl.3	50360	ENSG00000158748	HTR6	5-hydroxytryptamine receptor 6
chr1	20142678	20143092	415	*	CK6___lt__120_BAM_filter_on_data_707_peak_771	575	.	19.8839	61.9537	57.5423	238	Promoter (<=1kb)	1	20140522	20141771	1250	2	54546	uc001bcr.3	-907	ENSG00000178828	RNF186	ring finger protein 186
chr1	20208697	20208980	284	*	CK6___lt__120_BAM_filter_on_data_707_peak_773a	235	.	12.3698	27.1688	23.5954	96	Promoter (<=1kb)	1	20208888	20239437	30550	1	23252	uc001bcs.4	0	ENSG00000169914	OTUD3	OTU deubiquitinase 3
chr1	20208697	20208980	284	*	CK6___lt__120_BAM_filter_on_data_707_peak_773b	304	.	14.6158	34.1811	30.4039	220	Promoter (<=1kb)	1	20208888	20239437	30550	1	23252	uc001bcs.4	0	ENSG00000169914	OTUD3	OTU deubiquitinase 3
chr1	20216240	20216437	198	*	CK6___lt__120_BAM_filter_on_data_707_peak_774	103	.	8.37965	13.3775	10.322	70	Intron (uc001bcs.4/23252, intron 1 of 7)	1	20208888	20239437	30550	1	23252	uc001bcs.4	7352	ENSG00000169914	OTUD3	OTU deubiquitinase 3
chr1	20238344	20238872	529	*	CK6___lt__120_BAM_filter_on_data_707_peak_775a	124	.	7.25311	15.5709	12.4159	59	3' UTR	1	20246800	20250110	3311	2	30814	uc001bct.1	11238	ENSG00000188784	PLA2G2E	phospholipase A2 group IIE
chr1	20238344	20238872	529	*	CK6___lt__120_BAM_filter_on_data_707_peak_775a	124	.	7.25311	15.5709	12.4159	59	3' UTR	1	20246800	20250110	3311	2	30814	uc001bct.1	11238	ENSG00000188784	PLA2G2E	phospholipase A2 group IIE
chr1	20238344	20238872	529	*	CK6___lt__120_BAM_filter_on_data_707_peak_775b	538	.	17.9102	58.2181	53.8762	330	3' UTR	1	20246800	20250110	3311	2	30814	uc001bct.1	11238	ENSG00000188784	PLA2G2E	phospholipase A2 group IIE
chr1	20238344	20238872	529	*	CK6___lt__120_BAM_filter_on_data_707_peak_775b	538	.	17.9102	58.2181	53.8762	330	3' UTR	1	20246800	20250110	3311	2	30814	uc001bct.1	11238	ENSG00000188784	PLA2G2E	phospholipase A2 group IIE
chr1	20356235	20356399	165	*	CK6___lt__120_BAM_filter_on_data_707_peak_780	226	.	12.8737	26.2332	22.6895	127	Promoter (1-2kb)	1	20354672	20418394	63723	1	5322	uc001bcx.3	1563	ENSG00000127472	PLA2G5	phospholipase A2 group V
chr1	20384594	20384828	235	*	CK6___lt__120_BAM_filter_on_data_707_peak_781	87	.	7.20929	11.6851	8.71323	214	Intron (uc001bcx.3/5322, intron 3 of 9)	1	20396701	20418394	21694	1	5322	uc001bcy.3	-11873	ENSG00000127472	PLA2G5	phospholipase A2 group V
chr1	20384594	20384828	235	*	CK6___lt__120_BAM_filter_on_data_707_peak_781	87	.	7.20929	11.6851	8.71323	214	Intron (uc001bcx.3/5322, intron 3 of 9)	1	20396701	20418394	21694	1	5322	uc001bcy.3	-11873	ENSG00000127472	PLA2G5	phospholipase A2 group V
chr1	20987921	20988201	281	*	CK6___lt__120_BAM_filter_on_data_707_peak_797	378	.	16.6383	41.8711	37.8917	181	Promoter (<=1kb)	1	20978260	20988037	9778	2	1650	uc001bdo.1	0	ENSG00000244038	DDOST	dolichyl-diphosphooligosaccharide--protein glycosyltransferase non-catalytic subunit
chr1	21023364	21023594	231	*	CK6___lt__120_BAM_filter_on_data_707_peak_798	395	.	18.5058	43.5713	39.5496	100	Promoter (1-2kb)	1	20990507	21024981	34475	2	57576	uc009vpx.3	1387	ENSG00000117245	KIF17	kinesin family member 17
chr1	21059606	21060093	488	*	CK6___lt__120_BAM_filter_on_data_707_peak_800a	300	.	14.8135	33.8436	30.0764	84	Promoter (<=1kb)	1	21046225	21059330	13106	2	400745	uc001bdu.1	-276	ENSG00000189410	SH2D5	SH2 domain containing 5
chr1	21107854	21108075	222	*	CK6___lt__120_BAM_filter_on_data_707_peak_803	316	.	15.3581	35.4358	31.6241	126	Promoter (<=1kb)	1	21069623	21107033	37411	2	50809	uc001bdy.1	-821	ENSG00000127483	HP1BP3	heterochromatin protein 1 binding protein 3
chr1	21113264	21113455	192	*	CK6___lt__120_BAM_filter_on_data_707_peak_804	186	.	11.3289	22.0132	18.6107	191	Promoter (<=1kb)	1	21069171	21113181	44011	2	50809	uc001bdw.1	-83	ENSG00000127483	HP1BP3	heterochromatin protein 1 binding protein 3
chr1	21164096	21164231	136	*	CK6___lt__120_BAM_filter_on_data_707_peak_805	100	.	8.22735	13.1024	10.0604	164	Intron (uc010odi.2/8672, intron 19 of 25)	1	21080551	21113799	33249	2	50809	uc001bea.2	-50297	ENSG00000127483	HP1BP3	heterochromatin protein 1 binding protein 3
chr1	21417693	21417791	99	*	CK6___lt__120_BAM_filter_on_data_707_peak_809	98	.	8.18987	12.8546	9.82345	50	Promoter (1-2kb)	1	21267738	21415706	147969	2	8672	uc010odk.2	-1987	ENSG00000075151	EIF4G3	eukaryotic translation initiation factor 4 gamma 3
chr1	21444117	21444297	181	*	CK6___lt__120_BAM_filter_on_data_707_peak_810	131	.	9.82442	16.3148	13.1278	60	Intron (uc001bee.3/8672, intron 2 of 34)	1	21132785	21437876	305092	2	8672	uc001bec.3	-6241	ENSG00000075151	EIF4G3	eukaryotic translation initiation factor 4 gamma 3
chr1	21613871	21614034	164	*	CK6___lt__120_BAM_filter_on_data_707_peak_816	89	.	7.48567	11.8849	8.90069	101	Promoter (2-3kb)	1	21543740	21616766	73027	2	1889	uc001bei.2	2732	ENSG00000117298	ECE1	endothelin converting enzyme 1
chr1	21637602	21637774	173	*	CK6___lt__120_BAM_filter_on_data_707_peak_817	134	.	9.9854	16.6434	13.4434	63	Intron (uc001bem.2/1889, intron 1 of 18)	1	21619783	21626362	6580	1	100506801	uc001beo.2	17819	ENSG00000231105	LOC100506801	uncharacterized LOC100506801
chr1	21660778	21661016	239	*	CK6___lt__120_BAM_filter_on_data_707_peak_818	130	.	9.66882	16.219	13.036	165	Intron (uc001bem.2/1889, intron 1 of 18)	1	21543740	21672034	128295	2	1889	uc001bem.2	11018	ENSG00000117298	ECE1	endothelin converting enzyme 1
chr1	21987735	21988078	344	*	CK6___lt__120_BAM_filter_on_data_707_peak_826a	291	.	14.6624	32.9272	29.1842	216	Intron (uc001bex.3/5909, intron 1 of 24)	1	21922708	21995856	73149	2	5909	uc001bex.3	7778	ENSG00000076864	RAP1GAP	RAP1 GTPase activating protein
chr1	22023515	22023912	398	*	CK6___lt__120_BAM_filter_on_data_707_peak_827a	852	.	20.8612	90.0875	85.204	215	Intron (uc001bfa.3/84196, intron 11 of 14)	1	22012385	22031108	18724	2	84196	uc001bfd.1	7196	ENSG00000090686	USP48	ubiquitin specific peptidase 48
chr1	22023515	22023912	398	*	CK6___lt__120_BAM_filter_on_data_707_peak_827a	852	.	20.8612	90.0875	85.204	215	Intron (uc001bfa.3/84196, intron 11 of 14)	1	22012385	22031108	18724	2	84196	uc001bfd.1	7196	ENSG00000090686	USP48	ubiquitin specific peptidase 48
chr1	22023515	22023912	398	*	CK6___lt__120_BAM_filter_on_data_707_peak_827b	726	.	18.7031	77.326	72.6486	344	Intron (uc001bfa.3/84196, intron 11 of 14)	1	22012385	22031108	18724	2	84196	uc001bfd.1	7196	ENSG00000090686	USP48	ubiquitin specific peptidase 48
chr1	22023515	22023912	398	*	CK6___lt__120_BAM_filter_on_data_707_peak_827b	726	.	18.7031	77.326	72.6486	344	Intron (uc001bfa.3/84196, intron 11 of 14)	1	22012385	22031108	18724	2	84196	uc001bfd.1	7196	ENSG00000090686	USP48	ubiquitin specific peptidase 48
chr1	22030642	22030941	300	*	CK6___lt__120_BAM_filter_on_data_707_peak_828	250	.	8.42671	28.6948	25.0753	94	Promoter (<=1kb)	1	22012385	22031108	18724	2	84196	uc001bfd.1	167	ENSG00000090686	USP48	ubiquitin specific peptidase 48
chr1	22032960	22033260	301	*	CK6___lt__120_BAM_filter_on_data_707_peak_830b	144	.	6.17734	17.7213	14.4778	236	Promoter (1-2kb)	1	22012385	22031108	18724	2	84196	uc001bfd.1	-1852	ENSG00000090686	USP48	ubiquitin specific peptidase 48
chr1	22032960	22033260	301	*	CK6___lt__120_BAM_filter_on_data_707_peak_830b	144	.	6.17734	17.7213	14.4778	236	Promoter (1-2kb)	1	22012385	22031108	18724	2	84196	uc001bfd.1	-1852	ENSG00000090686	USP48	ubiquitin specific peptidase 48
chr1	22050641	22050866	226	*	CK6___lt__120_BAM_filter_on_data_707_peak_831	170	.	11.2478	20.4404	17.094	98	Promoter (<=1kb)	1	22004792	22051612	46821	2	84196	uc001bfa.3	746	ENSG00000090686	USP48	ubiquitin specific peptidase 48
chr1	22066680	22067133	454	*	CK6___lt__120_BAM_filter_on_data_707_peak_832a	104	.	7.09721	13.5089	10.4475	188	Intron (uc001bfb.3/84196, intron 8 of 26)	1	22004792	22051612	46821	2	84196	uc001bfa.3	-15068	ENSG00000090686	USP48	ubiquitin specific peptidase 48
chr1	22067812	22067972	161	*	CK6___lt__120_BAM_filter_on_data_707_peak_833	103	.	7.05182	13.4317	10.3745	54	Intron (uc001bfb.3/84196, intron 8 of 26)	1	22004792	22051612	46821	2	84196	uc001bfa.3	-16200	ENSG00000090686	USP48	ubiquitin specific peptidase 48
chr1	22102024	22102352	329	*	CK6___lt__120_BAM_filter_on_data_707_peak_835	462	.	16.3495	50.4566	46.2763	209	Intron (uc001bfb.3/84196, intron 1 of 26)	1	22004792	22109688	104897	2	84196	uc001bfb.3	7336	ENSG00000090686	USP48	ubiquitin specific peptidase 48
chr1	22102024	22102352	329	*	CK6___lt__120_BAM_filter_on_data_707_peak_835	462	.	16.3495	50.4566	46.2763	209	Intron (uc001bfb.3/84196, intron 1 of 26)	1	22004792	22109688	104897	2	84196	uc001bfb.3	7336	ENSG00000090686	USP48	ubiquitin specific peptidase 48
chr1	22109691	22109903	213	*	CK6___lt__120_BAM_filter_on_data_707_peak_837	139	.	8.12094	17.1255	13.9058	88	Promoter (<=1kb)	1	22054339	22109688	55350	2	84196	uc001bff.3	-3	ENSG00000090686	USP48	ubiquitin specific peptidase 48
chr1	22109691	22109903	213	*	CK6___lt__120_BAM_filter_on_data_707_peak_837	139	.	8.12094	17.1255	13.9058	88	Promoter (<=1kb)	1	22054339	22109688	55350	2	84196	uc001bff.3	-3	ENSG00000090686	USP48	ubiquitin specific peptidase 48
chr1	22162537	22162825	289	*	CK6___lt__120_BAM_filter_on_data_707_peak_840	306	.	16.3346	34.4761	30.6905	149	Intron (uc001bfj.3/3339, intron 75 of 96)	1	22148737	22157206	8470	2	3339	uc001bfi.3	-5331	ENSG00000142798	HSPG2	heparan sulfate proteoglycan 2
chr1	22257502	22257875	374	*	CK6___lt__120_BAM_filter_on_data_707_peak_842	348	.	16.9082	38.737	34.838	265	Intron (uc001bfj.3/3339, intron 1 of 96)	1	22148737	22263750	115014	2	3339	uc001bfj.3	5875	ENSG00000142798	HSPG2	heparan sulfate proteoglycan 2
chr1	22257502	22257875	374	*	CK6___lt__120_BAM_filter_on_data_707_peak_842	348	.	16.9082	38.737	34.838	265	Intron (uc001bfj.3/3339, intron 1 of 96)	1	22148737	22263750	115014	2	3339	uc001bfj.3	5875	ENSG00000142798	HSPG2	heparan sulfate proteoglycan 2
chr1	22266282	22266573	292	*	CK6___lt__120_BAM_filter_on_data_707_peak_843	280	.	13.5854	31.7638	28.0544	152	Promoter (2-3kb)	1	22148737	22263750	115014	2	3339	uc009vqd.3	-2532	ENSG00000142798	HSPG2	heparan sulfate proteoglycan 2
chr1	22311475	22311585	111	*	CK6___lt__120_BAM_filter_on_data_707_peak_844	99	.	8.25129	12.985	9.94803	64	Intron (uc001bfk.3/23436, intron 6 of 7)	1	22303418	22333141	29724	1	23436	uc009vqf.3	8057	ENSG00000219073	CELA3B	chymotrypsin like elastase family member 3B
chr1	22334281	22334384	104	*	CK6___lt__120_BAM_filter_on_data_707_peak_845	106	.	8.54584	13.6757	10.6056	67	Intron (uc001bfl.3/10136, intron 6 of 7)	1	22328149	22339035	10887	1	10136	uc001bfl.3	6132	ENSG00000142789	CELA3A	chymotrypsin like elastase family member 3A
chr1	22448848	22449290	443	*	CK6___lt__120_BAM_filter_on_data_707_peak_853a	420	.	15.3032	46.1758	42.0934	168	Intron (uc001bfs.4/54361, intron 2 of 4)	1	22443798	22469519	25722	2	54361	uc001bfs.4	20229	ENSG00000162552	WNT4	Wnt family member 4
chr1	22448848	22449290	443	*	CK6___lt__120_BAM_filter_on_data_707_peak_853b	116	.	7.06574	14.7764	11.657	392	Intron (uc001bfs.4/54361, intron 2 of 4)	1	22443798	22469519	25722	2	54361	uc001bfs.4	20229	ENSG00000162552	WNT4	Wnt family member 4
chr1	22778169	22778494	326	*	CK6___lt__120_BAM_filter_on_data_707_peak_860	803	.	27.2729	85.1912	80.3832	136	Promoter (<=1kb)	1	22778344	22857650	79307	1	9923	uc001bft.2	0	ENSG00000184677	ZBTB40	zinc finger and BTB domain containing 40
chr1	22809692	22809927	236	*	CK6___lt__120_BAM_filter_on_data_707_peak_861	119	.	9.00226	15.0329	11.9012	144	Intron (uc001bft.2/9923, intron 2 of 18)	1	22828069	22838627	10559	1	9923	uc001bfv.1	-18142	ENSG00000184677	ZBTB40	zinc finger and BTB domain containing 40
chr1	22827087	22827319	233	*	CK6___lt__120_BAM_filter_on_data_707_peak_862	243	.	14.2077	27.9593	24.3616	132	Promoter (<=1kb)	1	22828069	22838627	10559	1	9923	uc001bfv.1	-750	ENSG00000184677	ZBTB40	zinc finger and BTB domain containing 40
chr1	23345781	23346020	240	*	CK6___lt__120_BAM_filter_on_data_707_peak_869	163	.	10.8068	19.6823	16.3638	69	Promoter (<=1kb)	1	23345941	23410184	64244	1	23028	uc001bgi.2	0	ENSG00000004487	KDM1A	lysine demethylase 1A
chr1	23506413	23506810	398	*	CK6___lt__120_BAM_filter_on_data_707_peak_872a	142	.	8.91541	17.4956	14.2611	62	Promoter (2-3kb)	1	23417683	23504301	86619	2	7798	uc001bgm.1	-2112	ENSG00000169641	LUZP1	leucine zipper protein 1
chr1	23506413	23506810	398	*	CK6___lt__120_BAM_filter_on_data_707_peak_872a	142	.	8.91541	17.4956	14.2611	62	Promoter (2-3kb)	1	23417683	23504301	86619	2	7798	uc001bgm.1	-2112	ENSG00000169641	LUZP1	leucine zipper protein 1
chr1	23506413	23506810	398	*	CK6___lt__120_BAM_filter_on_data_707_peak_872b	109	.	7.64178	13.9854	10.9012	248	Promoter (2-3kb)	1	23417683	23504301	86619	2	7798	uc001bgm.1	-2112	ENSG00000169641	LUZP1	leucine zipper protein 1
chr1	23506413	23506810	398	*	CK6___lt__120_BAM_filter_on_data_707_peak_872b	109	.	7.64178	13.9854	10.9012	248	Promoter (2-3kb)	1	23417683	23504301	86619	2	7798	uc001bgm.1	-2112	ENSG00000169641	LUZP1	leucine zipper protein 1
chr1	23515353	23515755	403	*	CK6___lt__120_BAM_filter_on_data_707_peak_875a	194	.	10.217	22.9045	19.4705	122	Downstream (2-3kb)	1	23518388	23521222	2835	2	3352	uc001bgn.3	5467	ENSG00000179546	HTR1D	5-hydroxytryptamine receptor 1D
chr1	23515353	23515755	403	*	CK6___lt__120_BAM_filter_on_data_707_peak_875a	194	.	10.217	22.9045	19.4705	122	Downstream (2-3kb)	1	23518388	23521222	2835	2	3352	uc001bgn.3	5467	ENSG00000179546	HTR1D	5-hydroxytryptamine receptor 1D
chr1	23515353	23515755	403	*	CK6___lt__120_BAM_filter_on_data_707_peak_875a	194	.	10.217	22.9045	19.4705	122	Downstream (2-3kb)	1	23518388	23521222	2835	2	3352	uc001bgn.3	5467	ENSG00000179546	HTR1D	5-hydroxytryptamine receptor 1D
chr1	23515353	23515755	403	*	CK6___lt__120_BAM_filter_on_data_707_peak_875b	182	.	9.83862	21.6877	18.297	205	Downstream (2-3kb)	1	23518388	23521222	2835	2	3352	uc001bgn.3	5467	ENSG00000179546	HTR1D	5-hydroxytryptamine receptor 1D
chr1	23515353	23515755	403	*	CK6___lt__120_BAM_filter_on_data_707_peak_875b	182	.	9.83862	21.6877	18.297	205	Downstream (2-3kb)	1	23518388	23521222	2835	2	3352	uc001bgn.3	5467	ENSG00000179546	HTR1D	5-hydroxytryptamine receptor 1D
chr1	23515353	23515755	403	*	CK6___lt__120_BAM_filter_on_data_707_peak_875b	182	.	9.83862	21.6877	18.297	205	Downstream (2-3kb)	1	23518388	23521222	2835	2	3352	uc001bgn.3	5467	ENSG00000179546	HTR1D	5-hydroxytryptamine receptor 1D
chr1	23670776	23671307	532	*	CK6___lt__120_BAM_filter_on_data_707_peak_876	348	.	14.4456	38.7516	34.8522	325	Promoter (<=1kb)	1	23636276	23670853	34578	2	10236	uc001bgp.4	0	ENSG00000125944	HNRNPR	heterogeneous nuclear ribonucleoprotein R
chr1	23670776	23671307	532	*	CK6___lt__120_BAM_filter_on_data_707_peak_876	348	.	14.4456	38.7516	34.8522	325	Promoter (<=1kb)	1	23636276	23670853	34578	2	10236	uc001bgp.4	0	ENSG00000125944	HNRNPR	heterogeneous nuclear ribonucleoprotein R
chr1	23694679	23695040	362	*	CK6___lt__120_BAM_filter_on_data_707_peak_877	440	.	18.5264	48.1427	44.0145	205	Promoter (<=1kb)	1	23685941	23694879	8939	2	80818	uc001bgt.3	0	ENSG00000125945	ZNF436	zinc finger protein 436
chr1	23730435	23730655	221	*	CK6___lt__120_BAM_filter_on_data_707_peak_881a	83	.	7.43709	11.3223	8.36911	64	Intron (uc021oig.1/6920, intron 5 of 10)	1	23710671	23720526	9856	2	6920	uc009vqm.2	-9909	ENSG00000204219	TCEA3	transcription elongation factor A3
chr1	23730435	23730655	221	*	CK6___lt__120_BAM_filter_on_data_707_peak_881b	83	.	7.43709	11.3223	8.36911	179	Intron (uc021oig.1/6920, intron 5 of 10)	1	23710671	23720526	9856	2	6920	uc009vqm.2	-9909	ENSG00000204219	TCEA3	transcription elongation factor A3
chr1	23738276	23738482	207	*	CK6___lt__120_BAM_filter_on_data_707_peak_882	87	.	7.63271	11.7663	8.78994	92	Intron (uc021oig.1/6920, intron 4 of 10)	1	23707555	23751261	43707	2	6920	uc021oig.1	12779	ENSG00000204219	TCEA3	transcription elongation factor A3
chr1	23810788	23811293	506	*	CK6___lt__120_BAM_filter_on_data_707_peak_887a	169	.	9.98359	20.3048	16.9637	83	Promoter (<=1kb)	1	23768994	23811057	42064	2	55616	uc001bhc.1	0	ENSG00000088280	ASAP3	ArfGAP with SH3 domain, ankyrin repeat and PH domain 3
chr1	23810788	23811293	506	*	CK6___lt__120_BAM_filter_on_data_707_peak_887a	169	.	9.98359	20.3048	16.9637	83	Promoter (<=1kb)	1	23768994	23811057	42064	2	55616	uc001bhc.1	0	ENSG00000088280	ASAP3	ArfGAP with SH3 domain, ankyrin repeat and PH domain 3
chr1	23810788	23811293	506	*	CK6___lt__120_BAM_filter_on_data_707_peak_887b	221	.	11.8678	25.7212	22.1939	369	Promoter (<=1kb)	1	23768994	23811057	42064	2	55616	uc001bhc.1	0	ENSG00000088280	ASAP3	ArfGAP with SH3 domain, ankyrin repeat and PH domain 3
chr1	23810788	23811293	506	*	CK6___lt__120_BAM_filter_on_data_707_peak_887b	221	.	11.8678	25.7212	22.1939	369	Promoter (<=1kb)	1	23768994	23811057	42064	2	55616	uc001bhc.1	0	ENSG00000088280	ASAP3	ArfGAP with SH3 domain, ankyrin repeat and PH domain 3
chr1	23885949	23886216	268	*	CK6___lt__120_BAM_filter_on_data_707_peak_891	207	.	7.12652	24.2566	20.7772	130	Promoter (<=1kb)	1	23884421	23886285	1865	2	3399	uc001bhh.4	69	ENSG00000117318	ID3	inhibitor of DNA binding 3, HLH protein
chr1	23886379	23886615	237	*	CK6___lt__120_BAM_filter_on_data_707_peak_892	114	.	5.26518	14.6038	11.4922	91	Promoter (<=1kb)	1	23884421	23886285	1865	2	3399	uc001bhh.4	-94	ENSG00000117318	ID3	inhibitor of DNA binding 3, HLH protein
chr1	23888780	23889100	321	*	CK6___lt__120_BAM_filter_on_data_707_peak_893a	253	.	8.54896	29.0042	25.3754	128	Promoter (2-3kb)	1	23884421	23886285	1865	2	3399	uc001bhh.4	-2495	ENSG00000117318	ID3	inhibitor of DNA binding 3, HLH protein
chr1	23888780	23889100	321	*	CK6___lt__120_BAM_filter_on_data_707_peak_893a	253	.	8.54896	29.0042	25.3754	128	Promoter (2-3kb)	1	23884421	23886285	1865	2	3399	uc001bhh.4	-2495	ENSG00000117318	ID3	inhibitor of DNA binding 3, HLH protein
chr1	23888780	23889100	321	*	CK6___lt__120_BAM_filter_on_data_707_peak_893b	177	.	7.00242	21.1015	17.7315	240	Promoter (2-3kb)	1	23884421	23886285	1865	2	3399	uc001bhh.4	-2495	ENSG00000117318	ID3	inhibitor of DNA binding 3, HLH protein
chr1	23888780	23889100	321	*	CK6___lt__120_BAM_filter_on_data_707_peak_893b	177	.	7.00242	21.1015	17.7315	240	Promoter (2-3kb)	1	23884421	23886285	1865	2	3399	uc001bhh.4	-2495	ENSG00000117318	ID3	inhibitor of DNA binding 3, HLH protein
chr1	24018068	24018268	201	*	CK6___lt__120_BAM_filter_on_data_707_peak_898	89	.	7.78192	11.9839	8.99486	105	Promoter (<=1kb)	1	24018269	24022915	4647	1	6135	uc001bhk.3	-1	ENSG00000142676	RPL11	ribosomal protein L11
chr1	24126029	24126277	249	*	CK6___lt__120_BAM_filter_on_data_707_peak_907	157	.	9.52578	19.0176	15.7237	161	Promoter (<=1kb)	1	24122089	24126060	3972	2	2582	uc009vqo.1	0	ENSG00000117308	GALE	UDP-galactose-4-epimerase
chr1	24127252	24127471	220	*	CK6___lt__120_BAM_filter_on_data_707_peak_908	157	.	9.52578	19.0176	15.7237	76	Promoter (<=1kb)	1	24122089	24127294	5206	2	2582	uc001bhx.1	0	ENSG00000117308	GALE	UDP-galactose-4-epimerase
chr1	24136318	24136500	183	*	CK6___lt__120_BAM_filter_on_data_707_peak_909	204	.	12.7348	23.9198	20.4512	74	Intron (uc001bib.3/3155, intron 6 of 8)	1	24130890	24144073	13184	2	3155	uc021oii.1	7573	ENSG00000117305	HMGCL	3-hydroxymethyl-3-methylglutaryl-CoA lyase
chr1	24151844	24152102	259	*	CK6___lt__120_BAM_filter_on_data_707_peak_910	399	.	18.3217	43.9941	39.9619	226	Promoter (<=1kb)	1	24128367	24151949	23583	2	3155	uc001bib.3	0	ENSG00000117305	HMGCL	3-hydroxymethyl-3-methylglutaryl-CoA lyase
chr1	24165096	24165258	163	*	CK6___lt__120_BAM_filter_on_data_707_peak_912b	114	.	8.92511	14.6032	11.4917	218	Promoter (<=1kb)	1	24128367	24165110	36744	2	3155	uc001bic.3	0	ENSG00000117305	HMGCL	3-hydroxymethyl-3-methylglutaryl-CoA lyase
chr1	24191796	24192294	499	*	CK6___lt__120_BAM_filter_on_data_707_peak_913a	159	.	9.35395	19.2466	15.9446	104	Promoter (2-3kb)	1	24186288	24194787	8500	2	2517	uc010oed.1	2493	ENSG00000179163	FUCA1	alpha-L-fucosidase 1
chr1	24191796	24192294	499	*	CK6___lt__120_BAM_filter_on_data_707_peak_913a	159	.	9.35395	19.2466	15.9446	104	Promoter (2-3kb)	1	24186288	24194787	8500	2	2517	uc010oed.1	2493	ENSG00000179163	FUCA1	alpha-L-fucosidase 1
chr1	24191796	24192294	499	*	CK6___lt__120_BAM_filter_on_data_707_peak_913a	159	.	9.35395	19.2466	15.9446	104	Promoter (2-3kb)	1	24186288	24194787	8500	2	2517	uc010oed.1	2493	ENSG00000179163	FUCA1	alpha-L-fucosidase 1
chr1	24191796	24192294	499	*	CK6___lt__120_BAM_filter_on_data_707_peak_913b	147	.	8.94725	18.0477	14.7914	424	Promoter (2-3kb)	1	24186288	24194787	8500	2	2517	uc010oed.1	2493	ENSG00000179163	FUCA1	alpha-L-fucosidase 1
chr1	24191796	24192294	499	*	CK6___lt__120_BAM_filter_on_data_707_peak_913b	147	.	8.94725	18.0477	14.7914	424	Promoter (2-3kb)	1	24186288	24194787	8500	2	2517	uc010oed.1	2493	ENSG00000179163	FUCA1	alpha-L-fucosidase 1
chr1	24191796	24192294	499	*	CK6___lt__120_BAM_filter_on_data_707_peak_913b	147	.	8.94725	18.0477	14.7914	424	Promoter (2-3kb)	1	24186288	24194787	8500	2	2517	uc010oed.1	2493	ENSG00000179163	FUCA1	alpha-L-fucosidase 1
chr1	24285535	24285746	212	*	CK6___lt__120_BAM_filter_on_data_707_peak_918	88	.	7.49206	11.8272	8.84767	155	Promoter (<=1kb)	1	24286301	24289949	3649	1	55629	uc001big.3	-555	ENSG00000189266	PNRC2	proline rich nuclear receptor coactivator 2
chr1	24462816	24463020	205	*	CK6___lt__120_BAM_filter_on_data_707_peak_925	176	.	11.9297	21.0423	17.6739	55	Promoter (<=1kb)	1	24446261	24463799	17539	2	58985	uc010oeg.1	779	ENSG00000142677	IL22RA1	interleukin 22 receptor subunit alpha 1
chr1	24528489	24528620	132	*	CK6___lt__120_BAM_filter_on_data_707_peak_929	81	.	7.343	11.1172	8.1747	103	Promoter (1-2kb)	1	24526730	24538180	11451	1	284632	uc010oei.1	1759	ENSG00000230023	LOC284632	uncharacterized LOC284632
chr1	24648833	24649071	239	*	CK6___lt__120_BAM_filter_on_data_707_peak_936	456	.	19.9738	49.8312	45.6649	157	Promoter (<=1kb)	1	24649530	24681808	32279	1	57822	uc001biy.3	-459	ENSG00000158055	GRHL3	grainyhead like transcription factor 3
chr1	24648833	24649071	239	*	CK6___lt__120_BAM_filter_on_data_707_peak_936	456	.	19.9738	49.8312	45.6649	157	Promoter (<=1kb)	1	24649530	24681808	32279	1	57822	uc001biy.3	-459	ENSG00000158055	GRHL3	grainyhead like transcription factor 3
chr1	24717689	24718013	325	*	CK6___lt__120_BAM_filter_on_data_707_peak_937	90	.	7.64387	12.0844	9.09105	290	Promoter (<=1kb)	1	24695211	24718169	22959	2	90529	uc001bjf.3	156	ENSG00000001460	STPG1	sperm tail PG-rich repeat containing 1
chr1	24717689	24718013	325	*	CK6___lt__120_BAM_filter_on_data_707_peak_937	90	.	7.64387	12.0844	9.09105	290	Promoter (<=1kb)	1	24695211	24718169	22959	2	90529	uc001bjf.3	156	ENSG00000001460	STPG1	sperm tail PG-rich repeat containing 1
chr1	24745605	24746029	425	*	CK6___lt__120_BAM_filter_on_data_707_peak_940	591	.	16.6384	63.6305	59.1889	232	5' UTR	1	24742245	24799473	57229	1	57185	uc009vrc.3	3360	ENSG00000001461	NIPAL3	NIPA like domain containing 3
chr1	24762347	24762821	475	*	CK6___lt__120_BAM_filter_on_data_707_peak_941	1015	.	21.4007	106.672	101.56	234	Intron (uc010oek.2/57185, intron 2 of 7)	1	24782628	24792864	10237	1	57185	uc001bji.3	-19807	ENSG00000001461	NIPAL3	NIPA like domain containing 3
chr1	24786136	24786663	528	*	CK6___lt__120_BAM_filter_on_data_707_peak_943a	264	.	13.3893	30.1358	26.4736	306	Intron (uc001bjh.3/57185, intron 9 of 11)	1	24782628	24792864	10237	1	57185	uc001bji.3	3508	ENSG00000001461	NIPAL3	NIPA like domain containing 3
chr1	24786136	24786663	528	*	CK6___lt__120_BAM_filter_on_data_707_peak_943b	126	.	8.47987	15.8171	12.6517	469	Intron (uc001bjh.3/57185, intron 9 of 11)	1	24782628	24792864	10237	1	57185	uc001bji.3	3508	ENSG00000001461	NIPAL3	NIPA like domain containing 3
chr1	24795399	24795548	150	*	CK6___lt__120_BAM_filter_on_data_707_peak_944	85	.	7.5667	11.5567	8.59144	101	Exon (uc001bjh.3/57185, exon 12 of 12)	1	24782628	24792864	10237	1	57185	uc001bji.3	12771	ENSG00000001461	NIPAL3	NIPA like domain containing 3
chr1	24829284	24829501	218	*	CK6___lt__120_BAM_filter_on_data_707_peak_945	162	.	10.9537	19.5196	16.2068	134	Promoter (<=1kb)	1	24829387	24863510	34124	1	11123	uc001bjj.3	0	ENSG00000117602	RCAN3	RCAN family member 3
chr1	24969310	24969788	479	*	CK6___lt__120_BAM_filter_on_data_707_peak_952	1338	.	27.6181	139.356	133.873	246	Promoter (<=1kb)	1	24969594	24999772	30179	1	10250	uc001bjm.3	0	ENSG00000133226	SRRM1	serine and arginine repetitive matrix 1
chr1	25071473	25071900	428	*	CK6___lt__120_BAM_filter_on_data_707_peak_958	754	.	19.9681	80.1602	75.4328	232	Promoter (<=1kb)	1	25071760	25170815	99056	1	25932	uc001bjo.2	0	ENSG00000169504	CLIC4	chloride intracellular channel 4
chr1	25085766	25085922	157	*	CK6___lt__120_BAM_filter_on_data_707_peak_959	171	.	11.4751	20.4535	17.1067	99	Intron (uc001bjo.2/25932, intron 1 of 5)	1	25071878	25169078	97201	1	25932	uc001bjp.1	13888	ENSG00000169504	CLIC4	chloride intracellular channel 4
chr1	25154922	25155034	113	*	CK6___lt__120_BAM_filter_on_data_707_peak_962	115	.	8.59509	14.708	11.5918	61	Intron (uc001bjo.2/25932, intron 4 of 5)	1	25071878	25169078	97201	1	25932	uc001bjp.1	83044	ENSG00000169504	CLIC4	chloride intracellular channel 4
chr1	25237643	25237944	302	*	CK6___lt__120_BAM_filter_on_data_707_peak_965a	127	.	6.13426	15.9368	12.7666	96	Intron (uc001bjq.3/864, intron 3 of 4)	1	25226002	25256770	30769	2	864	uc001bjq.3	18826	ENSG00000020633	RUNX3	runt related transcription factor 3
chr1	25237643	25237944	302	*	CK6___lt__120_BAM_filter_on_data_707_peak_965a	127	.	6.13426	15.9368	12.7666	96	Intron (uc001bjq.3/864, intron 3 of 4)	1	25226002	25256770	30769	2	864	uc001bjq.3	18826	ENSG00000020633	RUNX3	runt related transcription factor 3
chr1	25238104	25238580	477	*	CK6___lt__120_BAM_filter_on_data_707_peak_965a	127	.	6.13426	15.9368	12.7666	96	Intron (uc001bjq.3/864, intron 3 of 4)	1	25226002	25256770	30769	2	864	uc001bjq.3	18190	ENSG00000020633	RUNX3	runt related transcription factor 3
chr1	25238104	25238580	477	*	CK6___lt__120_BAM_filter_on_data_707_peak_965a	127	.	6.13426	15.9368	12.7666	96	Intron (uc001bjq.3/864, intron 3 of 4)	1	25226002	25256770	30769	2	864	uc001bjq.3	18190	ENSG00000020633	RUNX3	runt related transcription factor 3
chr1	25237643	25237944	302	*	CK6___lt__120_BAM_filter_on_data_707_peak_965c	144	.	6.5335	17.7113	14.468	631	Intron (uc001bjq.3/864, intron 3 of 4)	1	25226002	25256770	30769	2	864	uc001bjq.3	18826	ENSG00000020633	RUNX3	runt related transcription factor 3
chr1	25237643	25237944	302	*	CK6___lt__120_BAM_filter_on_data_707_peak_965c	144	.	6.5335	17.7113	14.468	631	Intron (uc001bjq.3/864, intron 3 of 4)	1	25226002	25256770	30769	2	864	uc001bjq.3	18826	ENSG00000020633	RUNX3	runt related transcription factor 3
chr1	25238104	25238580	477	*	CK6___lt__120_BAM_filter_on_data_707_peak_965c	144	.	6.5335	17.7113	14.468	631	Intron (uc001bjq.3/864, intron 3 of 4)	1	25226002	25256770	30769	2	864	uc001bjq.3	18190	ENSG00000020633	RUNX3	runt related transcription factor 3
chr1	25238104	25238580	477	*	CK6___lt__120_BAM_filter_on_data_707_peak_965c	144	.	6.5335	17.7113	14.468	631	Intron (uc001bjq.3/864, intron 3 of 4)	1	25226002	25256770	30769	2	864	uc001bjq.3	18190	ENSG00000020633	RUNX3	runt related transcription factor 3
chr1	25237643	25237944	302	*	CK6___lt__120_BAM_filter_on_data_707_peak_965d	135	.	6.32274	16.7916	13.5858	787	Intron (uc001bjq.3/864, intron 3 of 4)	1	25226002	25256770	30769	2	864	uc001bjq.3	18826	ENSG00000020633	RUNX3	runt related transcription factor 3
chr1	25237643	25237944	302	*	CK6___lt__120_BAM_filter_on_data_707_peak_965d	135	.	6.32274	16.7916	13.5858	787	Intron (uc001bjq.3/864, intron 3 of 4)	1	25226002	25256770	30769	2	864	uc001bjq.3	18826	ENSG00000020633	RUNX3	runt related transcription factor 3
chr1	25238104	25238580	477	*	CK6___lt__120_BAM_filter_on_data_707_peak_965d	135	.	6.32274	16.7916	13.5858	787	Intron (uc001bjq.3/864, intron 3 of 4)	1	25226002	25256770	30769	2	864	uc001bjq.3	18190	ENSG00000020633	RUNX3	runt related transcription factor 3
chr1	25238104	25238580	477	*	CK6___lt__120_BAM_filter_on_data_707_peak_965d	135	.	6.32274	16.7916	13.5858	787	Intron (uc001bjq.3/864, intron 3 of 4)	1	25226002	25256770	30769	2	864	uc001bjq.3	18190	ENSG00000020633	RUNX3	runt related transcription factor 3
chr1	25237643	25237944	302	*	CK6___lt__120_BAM_filter_on_data_707_peak_965e	144	.	6.5256	17.6931	14.4512	847	Intron (uc001bjq.3/864, intron 3 of 4)	1	25226002	25256770	30769	2	864	uc001bjq.3	18826	ENSG00000020633	RUNX3	runt related transcription factor 3
chr1	25237643	25237944	302	*	CK6___lt__120_BAM_filter_on_data_707_peak_965e	144	.	6.5256	17.6931	14.4512	847	Intron (uc001bjq.3/864, intron 3 of 4)	1	25226002	25256770	30769	2	864	uc001bjq.3	18826	ENSG00000020633	RUNX3	runt related transcription factor 3
chr1	25238104	25238580	477	*	CK6___lt__120_BAM_filter_on_data_707_peak_965e	144	.	6.5256	17.6931	14.4512	847	Intron (uc001bjq.3/864, intron 3 of 4)	1	25226002	25256770	30769	2	864	uc001bjq.3	18190	ENSG00000020633	RUNX3	runt related transcription factor 3
chr1	25238104	25238580	477	*	CK6___lt__120_BAM_filter_on_data_707_peak_965e	144	.	6.5256	17.6931	14.4512	847	Intron (uc001bjq.3/864, intron 3 of 4)	1	25226002	25256770	30769	2	864	uc001bjq.3	18190	ENSG00000020633	RUNX3	runt related transcription factor 3
chr1	25285952	25286347	396	*	CK6___lt__120_BAM_filter_on_data_707_peak_968a	252	.	11.2305	28.8884	25.2632	147	Intron (uc009vrj.3/864, intron 2 of 6)	1	25226002	25291475	65474	2	864	uc009vrj.3	5128	ENSG00000020633	RUNX3	runt related transcription factor 3
chr1	25285952	25286347	396	*	CK6___lt__120_BAM_filter_on_data_707_peak_968a	252	.	11.2305	28.8884	25.2632	147	Intron (uc009vrj.3/864, intron 2 of 6)	1	25226002	25291475	65474	2	864	uc009vrj.3	5128	ENSG00000020633	RUNX3	runt related transcription factor 3
chr1	25285952	25286347	396	*	CK6___lt__120_BAM_filter_on_data_707_peak_968b	294	.	12.5305	33.2096	29.4589	267	Intron (uc009vrj.3/864, intron 2 of 6)	1	25226002	25291475	65474	2	864	uc009vrj.3	5128	ENSG00000020633	RUNX3	runt related transcription factor 3
chr1	25285952	25286347	396	*	CK6___lt__120_BAM_filter_on_data_707_peak_968b	294	.	12.5305	33.2096	29.4589	267	Intron (uc009vrj.3/864, intron 2 of 6)	1	25226002	25291475	65474	2	864	uc009vrj.3	5128	ENSG00000020633	RUNX3	runt related transcription factor 3
chr1	25291363	25291874	512	*	CK6___lt__120_BAM_filter_on_data_707_peak_969a	295	.	12.9474	33.303	29.55	100	Promoter (<=1kb)	1	25226002	25291475	65474	2	864	uc009vrj.3	0	ENSG00000020633	RUNX3	runt related transcription factor 3
chr1	25291363	25291874	512	*	CK6___lt__120_BAM_filter_on_data_707_peak_969b	271	.	12.3043	30.8388	27.1563	328	Promoter (<=1kb)	1	25226002	25291475	65474	2	864	uc009vrj.3	0	ENSG00000020633	RUNX3	runt related transcription factor 3
chr1	25559537	25559851	315	*	CK6___lt__120_BAM_filter_on_data_707_peak_985b	349	.	15.3113	38.8549	34.9531	246	Promoter (<=1kb)	1	25556800	25559013	2214	2	25949	uc001bjv.1	-524	ENSG00000117614	SYF2	SYF2 pre-mRNA splicing factor
chr1	25559537	25559851	315	*	CK6___lt__120_BAM_filter_on_data_707_peak_985b	349	.	15.3113	38.8549	34.9531	246	Promoter (<=1kb)	1	25556800	25559013	2214	2	25949	uc001bjv.1	-524	ENSG00000117614	SYF2	SYF2 pre-mRNA splicing factor
chr1	25655971	25656141	171	*	CK6___lt__120_BAM_filter_on_data_707_peak_991	122	.	9.33528	15.361	12.2146	90	3' UTR	1	25568740	25664656	95917	2	57035	uc021ojj.1	8515	ENSG00000117616	RSRP1	arginine and serine rich protein 1
chr1	25757179	25757352	174	*	CK6___lt__120_BAM_filter_on_data_707_peak_993	243	.	14.2077	27.9593	24.3616	98	Promoter (<=1kb)	1	25757388	25785383	27996	1	55219	uc009vrt.2	-36	ENSG00000204178	MACO1	macoilin 1
chr1	25890184	25890626	443	*	CK6___lt__120_BAM_filter_on_data_707_peak_995a	234	.	9.38923	27.0484	23.4783	121	Promoter (<=1kb)	1	25889298	25895377	6080	1	26119	uc009vrx.3	886	ENSG00000157978	LDLRAP1	low density lipoprotein receptor adaptor protein 1
chr1	25890184	25890626	443	*	CK6___lt__120_BAM_filter_on_data_707_peak_995b	1288	.	28.929	134.268	128.847	286	Promoter (<=1kb)	1	25889298	25895377	6080	1	26119	uc009vrx.3	886	ENSG00000157978	LDLRAP1	low density lipoprotein receptor adaptor protein 1
chr1	26132446	26132655	210	*	CK6___lt__120_BAM_filter_on_data_707_peak_1003	87	.	7.59448	11.7505	8.77539	129	Intron (uc021ojk.1/57190, intron 4 of 12)	1	26126667	26144713	18047	1	57190	uc021ojl.1	5779	ENSG00000162430	SELENON	selenoprotein N
chr1	26228987	26229230	244	*	CK6___lt__120_BAM_filter_on_data_707_peak_1010	137	.	8.58065	16.9353	13.7236	101	Intron (uc010oev.2/3925, intron 3 of 4)	1	26226607	26232644	6038	2	3925	uc001bkz.3	3414	ENSG00000117632	STMN1	stathmin 1
chr1	26301792	26301998	207	*	CK6___lt__120_BAM_filter_on_data_707_peak_1014	141	.	10.2832	17.4156	14.1836	113	Intron (uc001bld.4/5051, intron 8 of 10)	1	26286258	26324648	38391	2	5051	uc001bld.4	22650	ENSG00000158006	PAFAH2	platelet activating factor acetylhydrolase 2
chr1	26324558	26324839	282	*	CK6___lt__120_BAM_filter_on_data_707_peak_1015	270	.	14.8713	30.7688	27.0882	103	Promoter (<=1kb)	1	26286258	26324648	38391	2	5051	uc001bld.4	0	ENSG00000158006	PAFAH2	platelet activating factor acetylhydrolase 2
chr1	26354971	26355326	356	*	CK6___lt__120_BAM_filter_on_data_707_peak_1016	735	.	19.483	78.2264	73.533	147	Intron (uc001blf.3/2134, intron 1 of 10)	1	26348271	26362954	14684	1	2134	uc001blf.3	6700	ENSG00000158008	EXTL1	exostosin like glycosyltransferase 1
chr1	26394004	26394480	477	*	CK6___lt__120_BAM_filter_on_data_707_peak_1019	316	.	14.5747	35.4757	31.6629	224	Promoter (<=1kb)	1	26377796	26394125	16330	2	84676	uc001bli.2	0	ENSG00000158022	TRIM63	tripartite motif containing 63
chr1	26394004	26394480	477	*	CK6___lt__120_BAM_filter_on_data_707_peak_1019	316	.	14.5747	35.4757	31.6629	224	Promoter (<=1kb)	1	26377796	26394125	16330	2	84676	uc001bli.2	0	ENSG00000158022	TRIM63	tripartite motif containing 63
chr1	26560420	26560705	286	*	CK6___lt__120_BAM_filter_on_data_707_peak_1026	402	.	17.1966	44.322	40.2819	189	Promoter (<=1kb)	1	26560693	26605298	44606	1	64793	uc001blr.3	0	ENSG00000130695	CEP85	centrosomal protein 85
chr1	26560420	26560705	286	*	CK6___lt__120_BAM_filter_on_data_707_peak_1026	402	.	17.1966	44.322	40.2819	189	Promoter (<=1kb)	1	26560693	26605298	44606	1	64793	uc001blr.3	0	ENSG00000130695	CEP85	centrosomal protein 85
chr1	26566559	26566736	178	*	CK6___lt__120_BAM_filter_on_data_707_peak_1027	181	.	11.6031	21.4942	18.11	79	Intron (uc001blr.3/64793, intron 2 of 13)	1	26560693	26605299	44607	1	64793	uc010ofa.1	5866	ENSG00000130695	CEP85	centrosomal protein 85
chr1	26602161	26602600	440	*	CK6___lt__120_BAM_filter_on_data_707_peak_1028a	87	.	7.03738	11.7715	8.795	104	Intron (uc001blr.3/64793, intron 12 of 13)	1	26606213	26608013	1801	1	83442	uc001blu.3	-3613	ENSG00000142669	SH3BGRL3	SH3 domain binding glutamate rich protein like 3
chr1	26602161	26602600	440	*	CK6___lt__120_BAM_filter_on_data_707_peak_1028a	87	.	7.03738	11.7715	8.795	104	Intron (uc001blr.3/64793, intron 12 of 13)	1	26606213	26608013	1801	1	83442	uc001blu.3	-3613	ENSG00000142669	SH3BGRL3	SH3 domain binding glutamate rich protein like 3
chr1	26602161	26602600	440	*	CK6___lt__120_BAM_filter_on_data_707_peak_1028a	87	.	7.03738	11.7715	8.795	104	Intron (uc001blr.3/64793, intron 12 of 13)	1	26606213	26608013	1801	1	83442	uc001blu.3	-3613	ENSG00000142669	SH3BGRL3	SH3 domain binding glutamate rich protein like 3
chr1	26602161	26602600	440	*	CK6___lt__120_BAM_filter_on_data_707_peak_1028a	87	.	7.03738	11.7715	8.795	104	Intron (uc001blr.3/64793, intron 12 of 13)	1	26606213	26608013	1801	1	83442	uc001blu.3	-3613	ENSG00000142669	SH3BGRL3	SH3 domain binding glutamate rich protein like 3
chr1	26633099	26633291	193	*	CK6___lt__120_BAM_filter_on_data_707_peak_1030	308	.	16.7465	34.5996	30.8104	100	Promoter (<=1kb)	1	26608773	26633195	24423	2	91544	uc001blw.3	0	ENSG00000158062	UBXN11	UBX domain protein 11
chr1	26758485	26758830	346	*	CK6___lt__120_BAM_filter_on_data_707_peak_1034	133	.	9.4834	16.5918	13.3938	271	Promoter (<=1kb)	1	26758773	26797795	39023	1	79947	uc001bmk.3	0	ENSG00000117682	DHDDS	dehydrodolichyl diphosphate synthase subunit
chr1	26758485	26758830	346	*	CK6___lt__120_BAM_filter_on_data_707_peak_1034	133	.	9.4834	16.5918	13.3938	271	Promoter (<=1kb)	1	26758773	26797795	39023	1	79947	uc001bmk.3	0	ENSG00000117682	DHDDS	dehydrodolichyl diphosphate synthase subunit
chr1	26799426	26799675	250	*	CK6___lt__120_BAM_filter_on_data_707_peak_1035	225	.	12.7605	26.0435	22.506	240	Promoter (<=1kb)	1	26798902	26803133	4232	1	3151	uc001bmp.4	524	ENSG00000198830	HMGN2	high mobility group nucleosomal binding domain 2
chr1	26882179	26882377	199	*	CK6___lt__120_BAM_filter_on_data_707_peak_1037	121	.	9.34875	15.2597	12.1182	102	Promoter (1-2kb)	1	26881033	26881084	52	1	100302190	uc021ojp.1	1146	ENSG00000238705	MIR1976	microRNA 1976
chr1	27191623	27191838	216	*	CK6___lt__120_BAM_filter_on_data_707_peak_1044	143	.	10.2376	17.544	14.3071	113	Promoter (1-2kb)	1	27189633	27190947	1315	1	2810	uc001bnc.1	1990	ENSG00000175793	SFN	stratifin
chr1	27248031	27248283	253	*	CK6___lt__120_BAM_filter_on_data_707_peak_1046	100	.	8.22735	13.1024	10.0604	139	Promoter (<=1kb)	1	27248213	27273362	25150	1	10726	uc001bng.2	0	ENSG00000090273	NUDC	nuclear distribution C, dynein complex regulator
chr1	27328256	27328736	481	*	CK6___lt__120_BAM_filter_on_data_707_peak_1047	388	.	15.529	42.8793	38.8742	226	Intron (uc021ojq.1/uc021ojq.1, intron 1 of 1)	1	27320195	27327377	7183	1	388610	uc001bnj.4	8061	ENSG00000253368	TRNP1	TMF1-regulated nuclear protein 1
chr1	27464243	27464390	148	*	CK6___lt__120_BAM_filter_on_data_707_peak_1051	139	.	10.1906	17.1799	13.9572	119	Intron (uc001bnm.4/6548, intron 1 of 11)	1	27425300	27481621	56322	2	6548	uc001bnm.4	17231	ENSG00000090020	SLC9A1	solute carrier family 9 member A1
chr1	27560872	27561070	199	*	CK6___lt__120_BAM_filter_on_data_707_peak_1056	96	.	8.11151	12.6755	9.65229	74	Promoter (<=1kb)	1	27561007	27635124	74118	1	23038	uc001bno.4	0	ENSG00000142784	WDTC1	WD and tetratricopeptide repeats 1
chr1	27648540	27648846	307	*	CK6___lt__120_BAM_filter_on_data_707_peak_1060a	238	.	13.8774	27.3851	23.8051	84	Promoter (<=1kb)	1	27648636	27662891	14256	1	84065	uc001bnr.4	0	ENSG00000186501	TMEM222	transmembrane protein 222
chr1	27648540	27648846	307	*	CK6___lt__120_BAM_filter_on_data_707_peak_1060a	238	.	13.8774	27.3851	23.8051	84	Promoter (<=1kb)	1	27648636	27662891	14256	1	84065	uc001bnr.4	0	ENSG00000186501	TMEM222	transmembrane protein 222
chr1	27692028	27692520	493	*	CK6___lt__120_BAM_filter_on_data_707_peak_1061a	149	.	8.74139	18.203	14.9401	58	Promoter (<=1kb)	1	27681670	27693337	11668	2	9064	uc001bny.1	817	ENSG00000142733	MAP3K6	mitogen-activated protein kinase kinase kinase 6
chr1	27692028	27692520	493	*	CK6___lt__120_BAM_filter_on_data_707_peak_1061a	149	.	8.74139	18.203	14.9401	58	Promoter (<=1kb)	1	27681670	27693337	11668	2	9064	uc001bny.1	817	ENSG00000142733	MAP3K6	mitogen-activated protein kinase kinase kinase 6
chr1	27692028	27692520	493	*	CK6___lt__120_BAM_filter_on_data_707_peak_1061a	149	.	8.74139	18.203	14.9401	58	Promoter (<=1kb)	1	27681670	27693337	11668	2	9064	uc001bny.1	817	ENSG00000142733	MAP3K6	mitogen-activated protein kinase kinase kinase 6
chr1	27692028	27692520	493	*	CK6___lt__120_BAM_filter_on_data_707_peak_1061b	127	.	7.98127	15.921	12.7511	219	Promoter (<=1kb)	1	27681670	27693337	11668	2	9064	uc001bny.1	817	ENSG00000142733	MAP3K6	mitogen-activated protein kinase kinase kinase 6
chr1	27692028	27692520	493	*	CK6___lt__120_BAM_filter_on_data_707_peak_1061b	127	.	7.98127	15.921	12.7511	219	Promoter (<=1kb)	1	27681670	27693337	11668	2	9064	uc001bny.1	817	ENSG00000142733	MAP3K6	mitogen-activated protein kinase kinase kinase 6
chr1	27692028	27692520	493	*	CK6___lt__120_BAM_filter_on_data_707_peak_1061b	127	.	7.98127	15.921	12.7511	219	Promoter (<=1kb)	1	27681670	27693337	11668	2	9064	uc001bny.1	817	ENSG00000142733	MAP3K6	mitogen-activated protein kinase kinase kinase 6
chr1	27692028	27692520	493	*	CK6___lt__120_BAM_filter_on_data_707_peak_1061c	282	.	12.9221	31.933	28.219	422	Promoter (<=1kb)	1	27681670	27693337	11668	2	9064	uc001bny.1	817	ENSG00000142733	MAP3K6	mitogen-activated protein kinase kinase kinase 6
chr1	27692028	27692520	493	*	CK6___lt__120_BAM_filter_on_data_707_peak_1061c	282	.	12.9221	31.933	28.219	422	Promoter (<=1kb)	1	27681670	27693337	11668	2	9064	uc001bny.1	817	ENSG00000142733	MAP3K6	mitogen-activated protein kinase kinase kinase 6
chr1	27692028	27692520	493	*	CK6___lt__120_BAM_filter_on_data_707_peak_1061c	282	.	12.9221	31.933	28.219	422	Promoter (<=1kb)	1	27681670	27693337	11668	2	9064	uc001bny.1	817	ENSG00000142733	MAP3K6	mitogen-activated protein kinase kinase kinase 6
chr1	27718924	27719140	217	*	CK6___lt__120_BAM_filter_on_data_707_peak_1062	124	.	9.44379	15.5674	12.4125	90	Promoter (<=1kb)	1	27719148	27722317	3170	1	2827	uc001bod.4	-8	ENSG00000181773	GPR3	G protein-coupled receptor 3
chr1	27728977	27729265	289	*	CK6___lt__120_BAM_filter_on_data_707_peak_1063a	106	.	8.57001	13.728	10.6554	77	Downstream (1-2kb)	1	27719148	27722317	3170	1	2827	uc001bod.4	9829	ENSG00000181773	GPR3	G protein-coupled receptor 3
chr1	27728977	27729265	289	*	CK6___lt__120_BAM_filter_on_data_707_peak_1063a	106	.	8.57001	13.728	10.6554	77	Downstream (1-2kb)	1	27719148	27722317	3170	1	2827	uc001bod.4	9829	ENSG00000181773	GPR3	G protein-coupled receptor 3
chr1	27748625	27748954	330	*	CK6___lt__120_BAM_filter_on_data_707_peak_1066	465	.	17.7772	50.7544	46.5668	186	Intron (uc001bof.2/10163, intron 2 of 8)	1	27719148	27722317	3170	1	2827	uc001bod.4	29477	ENSG00000181773	GPR3	G protein-coupled receptor 3
chr1	27895020	27895202	183	*	CK6___lt__120_BAM_filter_on_data_707_peak_1072	196	.	12.8384	23.0947	19.6545	76	Intron (uc009vsy.3/27245, intron 1 of 6)	1	27860756	27930143	69388	2	27245	uc009vsy.3	34941	ENSG00000126705	AHDC1	AT-hook DNA binding motif containing 1
chr1	27998702	27999076	375	*	CK6___lt__120_BAM_filter_on_data_707_peak_1075	277	.	14.9492	31.5014	27.7997	171	Promoter (<=1kb)	1	27992572	27998724	6153	2	2537	uc001bon.1	0	ENSG00000126709	IFI6	interferon alpha inducible protein 6
chr1	27998702	27999076	375	*	CK6___lt__120_BAM_filter_on_data_707_peak_1075	277	.	14.9492	31.5014	27.7997	171	Promoter (<=1kb)	1	27992572	27998724	6153	2	2537	uc001bon.1	0	ENSG00000126709	IFI6	interferon alpha inducible protein 6
chr1	28052109	28052533	425	*	CK6___lt__120_BAM_filter_on_data_707_peak_1078a	681	.	19.7496	72.7768	68.1749	75	Promoter (<=1kb)	1	28052490	28086275	33786	1	199870	uc009vtb.3	0	ENSG00000009780	FAM76A	family with sequence similarity 76 member A
chr1	28052109	28052533	425	*	CK6___lt__120_BAM_filter_on_data_707_peak_1078a	681	.	19.7496	72.7768	68.1749	75	Promoter (<=1kb)	1	28052490	28086275	33786	1	199870	uc009vtb.3	0	ENSG00000009780	FAM76A	family with sequence similarity 76 member A
chr1	28052109	28052533	425	*	CK6___lt__120_BAM_filter_on_data_707_peak_1078b	462	.	15.1617	50.3954	46.2164	244	Promoter (<=1kb)	1	28052490	28086275	33786	1	199870	uc009vtb.3	0	ENSG00000009780	FAM76A	family with sequence similarity 76 member A
chr1	28052109	28052533	425	*	CK6___lt__120_BAM_filter_on_data_707_peak_1078b	462	.	15.1617	50.3954	46.2164	244	Promoter (<=1kb)	1	28052490	28086275	33786	1	199870	uc009vtb.3	0	ENSG00000009780	FAM76A	family with sequence similarity 76 member A
chr1	28099497	28099776	280	*	CK6___lt__120_BAM_filter_on_data_707_peak_1079	193	.	12.752	22.8033	19.3729	174	Promoter (<=1kb)	1	28099694	28150963	51270	1	23673	uc001bou.4	0	ENSG00000117758	STX12	syntaxin 12
chr1	28157155	28157311	157	*	CK6___lt__120_BAM_filter_on_data_707_peak_1081	121	.	9.32273	15.2976	12.1542	105	Promoter (<=1kb)	1	28157252	28178183	20932	1	5511	uc001bov.2	0	ENSG00000117751	PPP1R8	protein phosphatase 1 regulatory subunit 8
chr1	28201805	28201952	148	*	CK6___lt__120_BAM_filter_on_data_707_peak_1082	208	.	13.3331	24.3206	20.8386	97	Promoter (2-3kb)	1	28199055	28213193	14139	1	9473	uc010ofo.2	2750	ENSG00000130775	THEMIS2	thymocyte selection associated family member 2
chr1	28241143	28241300	158	*	CK6___lt__120_BAM_filter_on_data_707_peak_1084	129	.	9.75153	16.1346	12.9552	60	Promoter (<=1kb)	1	28218049	28241236	23188	2	6118	uc001bpe.1	0	ENSG00000117748	RPA2	replication protein A2
chr1	28341693	28341875	183	*	CK6___lt__120_BAM_filter_on_data_707_peak_1086	167	.	11.4675	20.13	16.7953	101	Intron (uc001bpi.2/2140, intron 8 of 17)	1	28286504	28294604	8101	1	55113	uc001bph.1	55189	ENSG00000158156	XKR8	XK related 8
chr1	28393454	28393617	164	*	CK6___lt__120_BAM_filter_on_data_707_peak_1088	92	.	7.85133	12.2163	9.21634	226	Intron (uc001bpi.2/2140, intron 1 of 17)	1	28296855	28415148	118294	2	2140	uc001bpi.2	21531	ENSG00000158161	EYA3	EYA transcriptional coactivator and phosphatase 3
chr1	28405744	28406067	324	*	CK6___lt__120_BAM_filter_on_data_707_peak_1089a	261	.	13.2198	29.8497	26.1961	56	Intron (uc001bpi.2/2140, intron 1 of 17)	1	28296855	28415148	118294	2	2140	uc001bpi.2	9081	ENSG00000158161	EYA3	EYA transcriptional coactivator and phosphatase 3
chr1	28405744	28406067	324	*	CK6___lt__120_BAM_filter_on_data_707_peak_1089a	261	.	13.2198	29.8497	26.1961	56	Intron (uc001bpi.2/2140, intron 1 of 17)	1	28296855	28415148	118294	2	2140	uc001bpi.2	9081	ENSG00000158161	EYA3	EYA transcriptional coactivator and phosphatase 3
chr1	28405744	28406067	324	*	CK6___lt__120_BAM_filter_on_data_707_peak_1089b	332	.	15.5016	37.0583	33.2026	213	Intron (uc001bpi.2/2140, intron 1 of 17)	1	28296855	28415148	118294	2	2140	uc001bpi.2	9081	ENSG00000158161	EYA3	EYA transcriptional coactivator and phosphatase 3
chr1	28405744	28406067	324	*	CK6___lt__120_BAM_filter_on_data_707_peak_1089b	332	.	15.5016	37.0583	33.2026	213	Intron (uc001bpi.2/2140, intron 1 of 17)	1	28296855	28415148	118294	2	2140	uc001bpi.2	9081	ENSG00000158161	EYA3	EYA transcriptional coactivator and phosphatase 3
chr1	28415079	28415326	248	*	CK6___lt__120_BAM_filter_on_data_707_peak_1090	242	.	13.8574	27.8936	24.2982	167	Promoter (<=1kb)	1	28296855	28415148	118294	2	2140	uc001bpi.2	0	ENSG00000158161	EYA3	EYA transcriptional coactivator and phosphatase 3
chr1	28495742	28496106	365	*	CK6___lt__120_BAM_filter_on_data_707_peak_1094a	261	.	12.0678	29.7762	26.1249	198	Intron (uc001bpl.3/5724, intron 1 of 1)	1	28473677	28503455	29779	2	5724	uc001bpl.3	7349	ENSG00000169403	PTAFR	platelet activating factor receptor
chr1	28495742	28496106	365	*	CK6___lt__120_BAM_filter_on_data_707_peak_1094a	261	.	12.0678	29.7762	26.1249	198	Intron (uc001bpl.3/5724, intron 1 of 1)	1	28473677	28503455	29779	2	5724	uc001bpl.3	7349	ENSG00000169403	PTAFR	platelet activating factor receptor
chr1	28495742	28496106	365	*	CK6___lt__120_BAM_filter_on_data_707_peak_1094b	563	.	20.113	60.6881	56.3008	347	Intron (uc001bpl.3/5724, intron 1 of 1)	1	28473677	28503455	29779	2	5724	uc001bpl.3	7349	ENSG00000169403	PTAFR	platelet activating factor receptor
chr1	28495742	28496106	365	*	CK6___lt__120_BAM_filter_on_data_707_peak_1094b	563	.	20.113	60.6881	56.3008	347	Intron (uc001bpl.3/5724, intron 1 of 1)	1	28473677	28503455	29779	2	5724	uc001bpl.3	7349	ENSG00000169403	PTAFR	platelet activating factor receptor
chr1	28523538	28523807	270	*	CK6___lt__120_BAM_filter_on_data_707_peak_1095	199	.	12.7036	23.44	19.9874	75	Downstream (2-3kb)	1	28473677	28520447	46771	2	5724	uc009vte.3	-3091	ENSG00000169403	PTAFR	platelet activating factor receptor
chr1	28523538	28523807	270	*	CK6___lt__120_BAM_filter_on_data_707_peak_1095	199	.	12.7036	23.44	19.9874	75	Downstream (2-3kb)	1	28473677	28520447	46771	2	5724	uc009vte.3	-3091	ENSG00000169403	PTAFR	platelet activating factor receptor
chr1	28559498	28559680	183	*	CK6___lt__120_BAM_filter_on_data_707_peak_1096	93	.	6.89768	12.3332	9.32735	65	Promoter (<=1kb)	1	28526790	28559542	32753	2	22826	uc001bpn.3	0	ENSG00000126698	DNAJC8	DnaJ heat shock protein family (Hsp40) member C8
chr1	28562471	28562634	164	*	CK6___lt__120_BAM_filter_on_data_707_peak_1097	378	.	16.1921	41.8376	37.859	109	Promoter (<=1kb)	1	28562602	28564616	2015	1	93974	uc001bpp.3	0	ENSG00000130770	ATPIF1	ATPase inhibitory factor 1
chr1	28585804	28586005	202	*	CK6___lt__120_BAM_filter_on_data_707_peak_1099	203	.	12.8918	23.785	20.3209	145	Promoter (<=1kb)	1	28585963	28609002	23040	1	83667	uc001bps.3	0	ENSG00000130766	SESN2	sestrin 2
chr1	28764567	28764779	213	*	CK6___lt__120_BAM_filter_on_data_707_peak_1110a	105	.	7.70577	13.6611	10.592	70	Promoter (<=1kb)	1	28764661	28826881	62221	1	65979	uc001bpy.3	0	ENSG00000204138	PHACTR4	phosphatase and actin regulator 4
chr1	28832446	28832831	386	*	CK6___lt__120_BAM_filter_on_data_707_peak_1112b	153	.	9.61906	18.6643	15.3841	390	Promoter (<=1kb)	1	28832455	28865708	33254	1	1104	uc001bqa.2	0	ENSG00000180198	RCC1	regulator of chromosome condensation 1
chr1	28832446	28832831	386	*	CK6___lt__120_BAM_filter_on_data_707_peak_1112b	153	.	9.61906	18.6643	15.3841	390	Promoter (<=1kb)	1	28832455	28865708	33254	1	1104	uc001bqa.2	0	ENSG00000180198	RCC1	regulator of chromosome condensation 1
chr1	28879099	28879528	430	*	CK6___lt__120_BAM_filter_on_data_707_peak_1116a	291	.	13.8746	32.9195	29.1771	431	Promoter (<=1kb)	1	28879529	28905057	25529	1	54952	uc001bqh.4	-1	ENSG00000180098	TRNAU1AP	tRNA selenocysteine 1 associated protein 1
chr1	28879099	28879528	430	*	CK6___lt__120_BAM_filter_on_data_707_peak_1116a	291	.	13.8746	32.9195	29.1771	431	Promoter (<=1kb)	1	28879529	28905057	25529	1	54952	uc001bqh.4	-1	ENSG00000180098	TRNAU1AP	tRNA selenocysteine 1 associated protein 1
chr1	28928190	28928438	249	*	CK6___lt__120_BAM_filter_on_data_707_peak_1120	145	.	9.97731	17.8413	14.5929	134	Downstream (1-2kb)	1	28919007	28921088	2082	1	115273	uc001bqv.3	9183	ENSG00000188060	RAB42	RAB42, member RAS oncogene family
chr1	28975161	28975849	689	*	CK6___lt__120_BAM_filter_on_data_707_peak_1123c	138	.	8.68253	17.1062	13.8872	495	Promoter (<=1kb)	1	28975112	28975246	135	1	26824	uc009vtj.1	49	ENSG00000274978	RNU11	RNA, U11 small nuclear
chr1	28975161	28975849	689	*	CK6___lt__120_BAM_filter_on_data_707_peak_1123c	138	.	8.68253	17.1062	13.8872	495	Promoter (<=1kb)	1	28975112	28975246	135	1	26824	uc009vtj.1	49	ENSG00000274978	RNU11	RNA, U11 small nuclear
chr1	28975161	28975849	689	*	CK6___lt__120_BAM_filter_on_data_707_peak_1123c	138	.	8.68253	17.1062	13.8872	495	Promoter (<=1kb)	1	28975112	28975246	135	1	26824	uc009vtj.1	49	ENSG00000274978	RNU11	RNA, U11 small nuclear
chr1	29063251	29063478	228	*	CK6___lt__120_BAM_filter_on_data_707_peak_1125	154	.	10.7199	18.7389	15.4564	120	Promoter (<=1kb)	1	29063462	29096287	32826	1	51441	uc001bre.3	0	ENSG00000198492	YTHDF2	YTH N6-methyladenosine RNA binding protein 2
chr1	29077849	29078171	323	*	CK6___lt__120_BAM_filter_on_data_707_peak_1126	216	.	12.223	25.1456	21.6364	126	Intron (uc021okf.1/51441, intron 5 of 5)	1	29063462	29096287	32826	1	51441	uc001bre.3	14387	ENSG00000198492	YTHDF2	YTH N6-methyladenosine RNA binding protein 2
chr1	29077849	29078171	323	*	CK6___lt__120_BAM_filter_on_data_707_peak_1126	216	.	12.223	25.1456	21.6364	126	Intron (uc021okf.1/51441, intron 5 of 5)	1	29063462	29096287	32826	1	51441	uc001bre.3	14387	ENSG00000198492	YTHDF2	YTH N6-methyladenosine RNA binding protein 2
chr1	29186865	29187165	301	*	CK6___lt__120_BAM_filter_on_data_707_peak_1132	148	.	10.3452	18.0719	14.8142	130	Intron (uc001brf.1/4985, intron 2 of 2)	1	29213603	29446558	232956	1	2035	uc001brg.2	-26438	ENSG00000159023	EPB41	erythrocyte membrane protein band 4.1
chr1	29211583	29211783	201	*	CK6___lt__120_BAM_filter_on_data_707_peak_1133	146	.	10.0412	17.9491	14.6965	145	Promoter (1-2kb)	1	29213603	29446558	232956	1	2035	uc001brg.2	-1820	ENSG00000159023	EPB41	erythrocyte membrane protein band 4.1
chr1	29240809	29241015	207	*	CK6___lt__120_BAM_filter_on_data_707_peak_1134b	190	.	12.1708	22.4841	19.0647	176	Promoter (<=1kb)	1	29241088	29380164	139077	1	2035	uc009vtk.2	-73	ENSG00000159023	EPB41	erythrocyte membrane protein band 4.1
chr1	29483494	29483729	236	*	CK6___lt__120_BAM_filter_on_data_707_peak_1140a	93	.	7.91078	12.3262	9.3206	107	Intron (uc001bro.3/6429, intron 3 of 5)	1	29474250	29508637	34388	2	6429	uc001bro.3	24908	ENSG00000116350	SRSF4	serine and arginine rich splicing factor 4
chr1	29483494	29483729	236	*	CK6___lt__120_BAM_filter_on_data_707_peak_1140b	108	.	8.66848	13.9125	10.8311	220	Intron (uc001bro.3/6429, intron 3 of 5)	1	29474250	29508637	34388	2	6429	uc001bro.3	24908	ENSG00000116350	SRSF4	serine and arginine rich splicing factor 4
chr1	29508521	29508859	339	*	CK6___lt__120_BAM_filter_on_data_707_peak_1141	212	.	12.6681	24.788	21.2907	107	Promoter (<=1kb)	1	29474250	29508637	34388	2	6429	uc001bro.3	0	ENSG00000116350	SRSF4	serine and arginine rich splicing factor 4
chr1	31190962	31191563	602	*	CK6___lt__120_BAM_filter_on_data_707_peak_1160a	140	.	9.61017	17.2267	14.0025	86	Promoter (<=1kb)	1	31191619	31199593	7975	1	100129196	uc001bsb.1	-56	ENSG00000186056	MATN1-AS1	MATN1 antisense RNA 1
chr1	31190962	31191563	602	*	CK6___lt__120_BAM_filter_on_data_707_peak_1160a	140	.	9.61017	17.2267	14.0025	86	Promoter (<=1kb)	1	31191619	31199593	7975	1	100129196	uc001bsb.1	-56	ENSG00000186056	MATN1-AS1	MATN1 antisense RNA 1
chr1	31190962	31191563	602	*	CK6___lt__120_BAM_filter_on_data_707_peak_1160b	141	.	9.72951	17.4258	14.1932	540	Promoter (<=1kb)	1	31191619	31199593	7975	1	100129196	uc001bsb.1	-56	ENSG00000186056	MATN1-AS1	MATN1 antisense RNA 1
chr1	31190962	31191563	602	*	CK6___lt__120_BAM_filter_on_data_707_peak_1160b	141	.	9.72951	17.4258	14.1932	540	Promoter (<=1kb)	1	31191619	31199593	7975	1	100129196	uc001bsb.1	-56	ENSG00000186056	MATN1-AS1	MATN1 antisense RNA 1
chr1	31205648	31205864	217	*	CK6___lt__120_BAM_filter_on_data_707_peak_1161	244	.	14.5561	28.0933	24.4916	147	3' UTR	1	31212003	31212079	77	2	100616164	uc021okj.1	6215	ENSG00000264773	MIR4420	microRNA 4420
chr1	31449913	31450168	256	*	CK6___lt__120_BAM_filter_on_data_707_peak_1177	117	.	9.09155	14.9067	11.7806	105	Intron (uc001bsf.1/9698, intron 3 of 15)	1	31441010	31441084	75	2	692200	uc001bsl.1	-8829	NA	SNORD103C	small nucleolar RNA, C/D box 103C
chr1	31769599	31769846	248	*	CK6___lt__120_BAM_filter_on_data_707_peak_1184	154	.	10.8772	18.7451	15.462	117	Promoter (<=1kb)	1	31769842	31837780	67939	1	51538	uc001bsp.1	0	ENSG00000121766	ZCCHC17	zinc finger CCHC-type containing 17
chr1	32161875	32162086	212	*	CK6___lt__120_BAM_filter_on_data_707_peak_1194	124	.	9.50581	15.5927	12.4366	129	Promoter (2-3kb)	1	32117848	32164207	46360	2	1307	uc001btj.1	2121	ENSG00000084636	COL16A1	collagen type XVI alpha 1 chain
chr1	32389523	32389785	263	*	CK6___lt__120_BAM_filter_on_data_707_peak_1200	172	.	10.4625	20.5738	17.2228	231	Intron (uc001bty.2/8073, intron 1 of 5)	1	32372022	32385259	13238	2	8073	uc010ogs.2	-4264	ENSG00000184007	PTP4A2	protein tyrosine phosphatase type IVA, member 2
chr1	32403994	32404177	184	*	CK6___lt__120_BAM_filter_on_data_707_peak_1202	93	.	7.61468	12.3503	9.34395	102	Promoter (<=1kb)	1	32372022	32403988	31967	2	8073	uc001bty.2	-6	ENSG00000184007	PTP4A2	protein tyrosine phosphatase type IVA, member 2
chr1	32479108	32479453	346	*	CK6___lt__120_BAM_filter_on_data_707_peak_1207	447	.	19.4427	48.9294	44.7842	249	Promoter (<=1kb)	1	32479295	32509482	30188	1	10657	uc001bua.2	0	ENSG00000121774	KHDRBS1	KH RNA binding domain containing, signal transduction associated 1
chr1	32599090	32599299	210	*	CK6___lt__120_BAM_filter_on_data_707_peak_1210	307	.	16.6892	34.4985	30.7123	71	Intron (uc001bug.3/23633, intron 1 of 13)	1	32608580	32642168	33589	1	23633	uc010ogy.2	-9281	ENSG00000025800	KPNA6	karyopherin subunit alpha 6
chr1	32645172	32645316	145	*	CK6___lt__120_BAM_filter_on_data_707_peak_1211	145	.	10.3903	17.8242	14.5764	59	Promoter (<=1kb)	1	32645345	32663886	18542	1	200081	uc001bui.3	-29	ENSG00000084652	TXLNA	taxilin alpha
chr1	32701758	32702133	376	*	CK6___lt__120_BAM_filter_on_data_707_peak_1213b	244	.	10.1405	28.0109	24.4119	258	Intron (uc001but.3/339483, intron 1 of 3)	1	32697261	32706265	9005	2	339483	uc001but.3	4132	NA	MTMR9LP	myotubularin related protein 9-like, pseudogene
chr1	32701758	32702133	376	*	CK6___lt__120_BAM_filter_on_data_707_peak_1213b	244	.	10.1405	28.0109	24.4119	258	Intron (uc001but.3/339483, intron 1 of 3)	1	32697261	32706265	9005	2	339483	uc001but.3	4132	NA	MTMR9LP	myotubularin related protein 9-like, pseudogene
chr1	32701758	32702133	376	*	CK6___lt__120_BAM_filter_on_data_707_peak_1213c	222	.	9.59265	25.7527	22.2242	375	Intron (uc001but.3/339483, intron 1 of 3)	1	32697261	32706265	9005	2	339483	uc001but.3	4132	NA	MTMR9LP	myotubularin related protein 9-like, pseudogene
chr1	32701758	32702133	376	*	CK6___lt__120_BAM_filter_on_data_707_peak_1213c	222	.	9.59265	25.7527	22.2242	375	Intron (uc001but.3/339483, intron 1 of 3)	1	32697261	32706265	9005	2	339483	uc001but.3	4132	NA	MTMR9LP	myotubularin related protein 9-like, pseudogene
chr1	32705859	32706062	204	*	CK6___lt__120_BAM_filter_on_data_707_peak_1214	110	.	6.49968	14.1609	11.0688	122	Promoter (<=1kb)	1	32697261	32706265	9005	2	339483	uc001but.3	203	NA	MTMR9LP	myotubularin related protein 9-like, pseudogene
chr1	32712490	32712819	330	*	CK6___lt__120_BAM_filter_on_data_707_peak_1215	896	.	27.1551	94.6099	89.6619	172	Promoter (<=1kb)	1	32712818	32714461	1644	1	84734	uc001buw.3	0	ENSG00000183615	FAM167B	family with sequence similarity 167 member B
chr1	32757523	32757747	225	*	CK6___lt__120_BAM_filter_on_data_707_peak_1216	230	.	13.974	26.5873	23.0316	122	Promoter (<=1kb)	1	32757708	32793590	35883	1	3065	uc010ohd.1	0	ENSG00000116478	HDAC1	histone deacetylase 1
chr1	32804015	32804127	113	*	CK6___lt__120_BAM_filter_on_data_707_peak_1217	85	.	7.53692	11.4988	8.53609	74	Promoter (2-3kb)	1	32799430	32801840	2411	2	65108	uc031plp.1	-2175	ENSG00000175130	MARCKSL1	MARCKS like 1
chr1	32860045	32860426	382	*	CK6___lt__120_BAM_filter_on_data_707_peak_1221	329	.	15.3455	36.7929	32.9444	93	Promoter (<=1kb)	1	32830705	32860062	29358	2	55108	uc001bvg.4	0	ENSG00000160058	BSDC1	BSD domain containing 1
chr1	32955777	32956040	264	*	CK6___lt__120_BAM_filter_on_data_707_peak_1228a	112	.	7.62037	14.3912	11.2883	77	Intron (uc001bvk.3/653121, intron 4 of 9)	1	32930658	32953459	22802	1	728116	uc001bvl.4	25119	ENSG00000273274	ZBTB8B	zinc finger and BTB domain containing 8B
chr1	32958105	32958217	113	*	CK6___lt__120_BAM_filter_on_data_707_peak_1229	141	.	8.54792	17.3711	14.141	78	Intron (uc001bvk.3/653121, intron 4 of 9)	1	32930658	32953459	22802	1	728116	uc001bvl.4	27447	ENSG00000273274	ZBTB8B	zinc finger and BTB domain containing 8B
chr1	33116081	33116228	148	*	CK6___lt__120_BAM_filter_on_data_707_peak_1234	163	.	8.70363	19.6809	16.3628	101	Promoter (<=1kb)	1	33065773	33116185	50413	2	339487	uc001bvo.1	0	ENSG00000176261	ZBTB8OS	zinc finger and BTB domain containing 8 opposite strand
chr1	33116595	33116817	223	*	CK6___lt__120_BAM_filter_on_data_707_peak_1235	329	.	13.3902	36.823	32.9738	157	Promoter (<=1kb)	1	33116749	33151812	35064	1	5928	uc001bvr.3	0	ENSG00000162521	RBBP4	RB binding protein 4, chromatin remodeling factor
chr1	33169249	33169661	413	*	CK6___lt__120_BAM_filter_on_data_707_peak_1239a	181	.	10.3918	21.5274	18.142	161	Promoter (<=1kb)	1	33145507	33168361	22855	2	81493	uc010ohl.1	-888	ENSG00000162520	SYNC	syncoilin, intermediate filament protein
chr1	33169249	33169661	413	*	CK6___lt__120_BAM_filter_on_data_707_peak_1239a	181	.	10.3918	21.5274	18.142	161	Promoter (<=1kb)	1	33145507	33168361	22855	2	81493	uc010ohl.1	-888	ENSG00000162520	SYNC	syncoilin, intermediate filament protein
chr1	33169249	33169661	413	*	CK6___lt__120_BAM_filter_on_data_707_peak_1239a	181	.	10.3918	21.5274	18.142	161	Promoter (<=1kb)	1	33145507	33168361	22855	2	81493	uc010ohl.1	-888	ENSG00000162520	SYNC	syncoilin, intermediate filament protein
chr1	33169249	33169661	413	*	CK6___lt__120_BAM_filter_on_data_707_peak_1239b	157	.	9.54952	19.0572	15.762	303	Promoter (<=1kb)	1	33145507	33168361	22855	2	81493	uc010ohl.1	-888	ENSG00000162520	SYNC	syncoilin, intermediate filament protein
chr1	33169249	33169661	413	*	CK6___lt__120_BAM_filter_on_data_707_peak_1239b	157	.	9.54952	19.0572	15.762	303	Promoter (<=1kb)	1	33145507	33168361	22855	2	81493	uc010ohl.1	-888	ENSG00000162520	SYNC	syncoilin, intermediate filament protein
chr1	33169249	33169661	413	*	CK6___lt__120_BAM_filter_on_data_707_peak_1239b	157	.	9.54952	19.0572	15.762	303	Promoter (<=1kb)	1	33145507	33168361	22855	2	81493	uc010ohl.1	-888	ENSG00000162520	SYNC	syncoilin, intermediate filament protein
chr1	33215529	33215793	265	*	CK6___lt__120_BAM_filter_on_data_707_peak_1242	136	.	9.38006	16.8446	13.6362	181	Intron (uc001bvu.1/57648, intron 1 of 6)	1	33219687	33240571	20885	1	57648	uc010ohm.1	-3894	ENSG00000162522	KIAA1522	KIAA1522
chr1	33215529	33215793	265	*	CK6___lt__120_BAM_filter_on_data_707_peak_1242	136	.	9.38006	16.8446	13.6362	181	Intron (uc001bvu.1/57648, intron 1 of 6)	1	33219687	33240571	20885	1	57648	uc010ohm.1	-3894	ENSG00000162522	KIAA1522	KIAA1522
chr1	33252520	33252678	159	*	CK6___lt__120_BAM_filter_on_data_707_peak_1243	198	.	12.8166	23.2983	19.8506	117	Exon (uc001bvy.1/8565, exon 7 of 13)	1	33240840	33249356	8517	2	8565	uc001bvx.1	-3164	ENSG00000134684	YARS	tyrosyl-tRNA synthetase
chr1	33283015	33283201	187	*	CK6___lt__120_BAM_filter_on_data_707_peak_1245	158	.	10.2384	19.1943	15.8937	95	Promoter (<=1kb)	1	33283043	33324480	41438	1	64766	uc001bvz.4	0	ENSG00000116497	S100PBP	S100P binding protein
chr1	33405288	33405633	346	*	CK6___lt__120_BAM_filter_on_data_707_peak_1249	684	.	23.0871	73.0582	68.4517	188	Intron (uc001bwm.4/127544, intron 7 of 8)	1	33402050	33430286	28237	2	127544	uc001bwm.4	24653	ENSG00000116514	RNF19B	ring finger protein 19B
chr1	33430444	33430632	189	*	CK6___lt__120_BAM_filter_on_data_707_peak_1250	500	.	21.2265	54.3389	50.0744	144	Promoter (<=1kb)	1	33402050	33430286	28237	2	127544	uc010ohp.2	-158	ENSG00000116514	RNF19B	ring finger protein 19B
chr1	33458174	33458289	116	*	CK6___lt__120_BAM_filter_on_data_707_peak_1251	153	.	10.7929	18.5823	15.3052	87	Intron (uc001bwn.3/uc001bwn.3, intron 1 of 1)	1	33402050	33430286	28237	2	127544	uc010ohp.2	-27888	ENSG00000116514	RNF19B	ring finger protein 19B
chr1	33470396	33470579	184	*	CK6___lt__120_BAM_filter_on_data_707_peak_1252	86	.	4.08435	11.5773	8.61159	175	Intron (uc001bwn.3/uc001bwn.3, intron 1 of 1)	1	33473541	33502512	28972	2	204	uc001bwo.2	31933	ENSG00000004455	AK2	adenylate kinase 2
chr1	33471040	33471741	702	*	CK6___lt__120_BAM_filter_on_data_707_peak_1253a	1049	.	16.1388	110.151	104.991	158	Intron (uc001bwn.3/uc001bwn.3, intron 1 of 1)	1	33473541	33502512	28972	2	204	uc001bwo.2	30771	ENSG00000004455	AK2	adenylate kinase 2
chr1	33471040	33471741	702	*	CK6___lt__120_BAM_filter_on_data_707_peak_1253a	1049	.	16.1388	110.151	104.991	158	Intron (uc001bwn.3/uc001bwn.3, intron 1 of 1)	1	33473541	33502512	28972	2	204	uc001bwo.2	30771	ENSG00000004455	AK2	adenylate kinase 2
chr1	33471040	33471741	702	*	CK6___lt__120_BAM_filter_on_data_707_peak_1253a	1049	.	16.1388	110.151	104.991	158	Intron (uc001bwn.3/uc001bwn.3, intron 1 of 1)	1	33473541	33502512	28972	2	204	uc001bwo.2	30771	ENSG00000004455	AK2	adenylate kinase 2
chr1	33471040	33471741	702	*	CK6___lt__120_BAM_filter_on_data_707_peak_1253b	854	.	14.1158	90.3429	85.456	346	Intron (uc001bwn.3/uc001bwn.3, intron 1 of 1)	1	33473541	33502512	28972	2	204	uc001bwo.2	30771	ENSG00000004455	AK2	adenylate kinase 2
chr1	33471040	33471741	702	*	CK6___lt__120_BAM_filter_on_data_707_peak_1253b	854	.	14.1158	90.3429	85.456	346	Intron (uc001bwn.3/uc001bwn.3, intron 1 of 1)	1	33473541	33502512	28972	2	204	uc001bwo.2	30771	ENSG00000004455	AK2	adenylate kinase 2
chr1	33471040	33471741	702	*	CK6___lt__120_BAM_filter_on_data_707_peak_1253b	854	.	14.1158	90.3429	85.456	346	Intron (uc001bwn.3/uc001bwn.3, intron 1 of 1)	1	33473541	33502512	28972	2	204	uc001bwo.2	30771	ENSG00000004455	AK2	adenylate kinase 2
chr1	33471040	33471741	702	*	CK6___lt__120_BAM_filter_on_data_707_peak_1253c	141	.	5.08679	17.3514	14.1226	638	Intron (uc001bwn.3/uc001bwn.3, intron 1 of 1)	1	33473541	33502512	28972	2	204	uc001bwo.2	30771	ENSG00000004455	AK2	adenylate kinase 2
chr1	33471040	33471741	702	*	CK6___lt__120_BAM_filter_on_data_707_peak_1253c	141	.	5.08679	17.3514	14.1226	638	Intron (uc001bwn.3/uc001bwn.3, intron 1 of 1)	1	33473541	33502512	28972	2	204	uc001bwo.2	30771	ENSG00000004455	AK2	adenylate kinase 2
chr1	33471040	33471741	702	*	CK6___lt__120_BAM_filter_on_data_707_peak_1253c	141	.	5.08679	17.3514	14.1226	638	Intron (uc001bwn.3/uc001bwn.3, intron 1 of 1)	1	33473541	33502512	28972	2	204	uc001bwo.2	30771	ENSG00000004455	AK2	adenylate kinase 2
chr1	33502480	33502721	242	*	CK6___lt__120_BAM_filter_on_data_707_peak_1255	313	.	15.9634	35.1165	31.3135	118	Promoter (<=1kb)	1	33473541	33502512	28972	2	204	uc001bwo.2	0	ENSG00000004455	AK2	adenylate kinase 2
chr1	33546602	33546746	145	*	CK6___lt__120_BAM_filter_on_data_707_peak_1260	254	.	15.4203	29.1294	25.4971	63	Promoter (<=1kb)	1	33546714	33585995	39282	1	113451	uc001bwr.3	0	ENSG00000142920	AZIN2	antizyme inhibitor 2
chr1	33564961	33565493	533	*	CK6___lt__120_BAM_filter_on_data_707_peak_1262a	246	.	9.97051	28.2585	24.652	167	Intron (uc001bwr.3/113451, intron 10 of 11)	1	33547779	33585995	38217	1	113451	uc009vug.3	17182	ENSG00000142920	AZIN2	antizyme inhibitor 2
chr1	33564961	33565493	533	*	CK6___lt__120_BAM_filter_on_data_707_peak_1262b	527	.	16.1684	57.0906	52.7712	333	Intron (uc001bwr.3/113451, intron 10 of 11)	1	33547779	33585995	38217	1	113451	uc009vug.3	17182	ENSG00000142920	AZIN2	antizyme inhibitor 2
chr1	33626608	33627173	566	*	CK6___lt__120_BAM_filter_on_data_707_peak_1266a	236	.	10.9651	27.1737	23.6003	93	Intron (uc001bxb.3/55223, intron 2 of 4)	1	33611003	33647671	36669	2	55223	uc001bxb.3	20498	ENSG00000116525	TRIM62	tripartite motif containing 62
chr1	33626608	33627173	566	*	CK6___lt__120_BAM_filter_on_data_707_peak_1266a	236	.	10.9651	27.1737	23.6003	93	Intron (uc001bxb.3/55223, intron 2 of 4)	1	33611003	33647671	36669	2	55223	uc001bxb.3	20498	ENSG00000116525	TRIM62	tripartite motif containing 62
chr1	33626608	33627173	566	*	CK6___lt__120_BAM_filter_on_data_707_peak_1266a	236	.	10.9651	27.1737	23.6003	93	Intron (uc001bxb.3/55223, intron 2 of 4)	1	33611003	33647671	36669	2	55223	uc001bxb.3	20498	ENSG00000116525	TRIM62	tripartite motif containing 62
chr1	33626608	33627173	566	*	CK6___lt__120_BAM_filter_on_data_707_peak_1266b	94	.	6.49777	12.4768	9.4639	242	Intron (uc001bxb.3/55223, intron 2 of 4)	1	33611003	33647671	36669	2	55223	uc001bxb.3	20498	ENSG00000116525	TRIM62	tripartite motif containing 62
chr1	33626608	33627173	566	*	CK6___lt__120_BAM_filter_on_data_707_peak_1266b	94	.	6.49777	12.4768	9.4639	242	Intron (uc001bxb.3/55223, intron 2 of 4)	1	33611003	33647671	36669	2	55223	uc001bxb.3	20498	ENSG00000116525	TRIM62	tripartite motif containing 62
chr1	33626608	33627173	566	*	CK6___lt__120_BAM_filter_on_data_707_peak_1266b	94	.	6.49777	12.4768	9.4639	242	Intron (uc001bxb.3/55223, intron 2 of 4)	1	33611003	33647671	36669	2	55223	uc001bxb.3	20498	ENSG00000116525	TRIM62	tripartite motif containing 62
chr1	33626608	33627173	566	*	CK6___lt__120_BAM_filter_on_data_707_peak_1266c	322	.	13.3375	36.0391	32.211	395	Intron (uc001bxb.3/55223, intron 2 of 4)	1	33611003	33647671	36669	2	55223	uc001bxb.3	20498	ENSG00000116525	TRIM62	tripartite motif containing 62
chr1	33626608	33627173	566	*	CK6___lt__120_BAM_filter_on_data_707_peak_1266c	322	.	13.3375	36.0391	32.211	395	Intron (uc001bxb.3/55223, intron 2 of 4)	1	33611003	33647671	36669	2	55223	uc001bxb.3	20498	ENSG00000116525	TRIM62	tripartite motif containing 62
chr1	33626608	33627173	566	*	CK6___lt__120_BAM_filter_on_data_707_peak_1266c	322	.	13.3375	36.0391	32.211	395	Intron (uc001bxb.3/55223, intron 2 of 4)	1	33611003	33647671	36669	2	55223	uc001bxb.3	20498	ENSG00000116525	TRIM62	tripartite motif containing 62
chr1	33642056	33642392	337	*	CK6___lt__120_BAM_filter_on_data_707_peak_1268	223	.	12.331	25.9057	22.3727	164	Intron (uc001bxb.3/55223, intron 1 of 4)	1	33611003	33647671	36669	2	55223	uc001bxb.3	5279	ENSG00000116525	TRIM62	tripartite motif containing 62
chr1	33726963	33727414	452	*	CK6___lt__120_BAM_filter_on_data_707_peak_1273	593	.	20.8883	63.794	59.3492	256	Intron (uc001bxc.1/149076, intron 1 of 8)	1	33722174	33766320	44147	1	149076	uc001bxc.1	4789	ENSG00000160094	ZNF362	zinc finger protein 362
chr1	33726963	33727414	452	*	CK6___lt__120_BAM_filter_on_data_707_peak_1273	593	.	20.8883	63.794	59.3492	256	Intron (uc001bxc.1/149076, intron 1 of 8)	1	33722174	33766320	44147	1	149076	uc001bxc.1	4789	ENSG00000160094	ZNF362	zinc finger protein 362
chr1	33748420	33748773	354	*	CK6___lt__120_BAM_filter_on_data_707_peak_1274a	223	.	12.2975	25.8498	22.3184	75	Intron (uc001bxc.1/149076, intron 6 of 8)	1	33722174	33766320	44147	1	149076	uc001bxc.1	26246	ENSG00000160094	ZNF362	zinc finger protein 362
chr1	33748420	33748773	354	*	CK6___lt__120_BAM_filter_on_data_707_peak_1274a	223	.	12.2975	25.8498	22.3184	75	Intron (uc001bxc.1/149076, intron 6 of 8)	1	33722174	33766320	44147	1	149076	uc001bxc.1	26246	ENSG00000160094	ZNF362	zinc finger protein 362
chr1	33748420	33748773	354	*	CK6___lt__120_BAM_filter_on_data_707_peak_1274b	565	.	23.1761	60.9562	56.5633	260	Intron (uc001bxc.1/149076, intron 6 of 8)	1	33722174	33766320	44147	1	149076	uc001bxc.1	26246	ENSG00000160094	ZNF362	zinc finger protein 362
chr1	33748420	33748773	354	*	CK6___lt__120_BAM_filter_on_data_707_peak_1274b	565	.	23.1761	60.9562	56.5633	260	Intron (uc001bxc.1/149076, intron 6 of 8)	1	33722174	33766320	44147	1	149076	uc001bxc.1	26246	ENSG00000160094	ZNF362	zinc finger protein 362
chr1	33815497	33815654	158	*	CK6___lt__120_BAM_filter_on_data_707_peak_1279	495	.	19.5213	53.8418	49.5869	67	Promoter (<=1kb)	1	33789224	33815499	26276	2	1912	uc001bxe.1	0	ENSG00000134686	PHC2	polyhomeotic homolog 2
chr1	33876255	33876479	225	*	CK6___lt__120_BAM_filter_on_data_707_peak_1283	96	.	8.11151	12.6755	9.65229	136	Intron (uc009vuh.1/1912, intron 1 of 14)	1	33789224	33896216	106993	2	1912	uc009vuh.1	19737	ENSG00000134686	PHC2	polyhomeotic homolog 2
chr1	33896607	33896866	260	*	CK6___lt__120_BAM_filter_on_data_707_peak_1284	97	.	6.66804	12.7727	9.746	110	Promoter (<=1kb)	1	33832717	33896615	63899	2	1912	uc001bxi.1	0	ENSG00000134686	PHC2	polyhomeotic homolog 2
chr1	33899150	33899618	469	*	CK6___lt__120_BAM_filter_on_data_707_peak_1285a	253	.	11.6282	28.99	25.3622	86	Promoter (2-3kb)	1	33832717	33896615	63899	2	1912	uc001bxi.1	-2535	ENSG00000134686	PHC2	polyhomeotic homolog 2
chr1	33899150	33899618	469	*	CK6___lt__120_BAM_filter_on_data_707_peak_1285a	253	.	11.6282	28.99	25.3622	86	Promoter (2-3kb)	1	33832717	33896615	63899	2	1912	uc001bxi.1	-2535	ENSG00000134686	PHC2	polyhomeotic homolog 2
chr1	33899150	33899618	469	*	CK6___lt__120_BAM_filter_on_data_707_peak_1285b	149	.	8.45688	18.214	14.9508	335	Promoter (2-3kb)	1	33832717	33896615	63899	2	1912	uc001bxi.1	-2535	ENSG00000134686	PHC2	polyhomeotic homolog 2
chr1	33899150	33899618	469	*	CK6___lt__120_BAM_filter_on_data_707_peak_1285b	149	.	8.45688	18.214	14.9508	335	Promoter (2-3kb)	1	33832717	33896615	63899	2	1912	uc001bxi.1	-2535	ENSG00000134686	PHC2	polyhomeotic homolog 2
chr1	33937996	33938201	206	*	CK6___lt__120_BAM_filter_on_data_707_peak_1289	260	.	13.4965	29.6824	26.034	137	Promoter (<=1kb)	1	33938232	33961995	23764	1	7579	uc001bxj.4	-31	ENSG00000121903	ZSCAN20	zinc finger and SCAN domain containing 20
chr1	34516901	34517014	114	*	CK6___lt__120_BAM_filter_on_data_707_peak_1292	217	.	13.7774	25.2457	21.7333	65	Intron (uc001bxm.1/114784, intron 2 of 70)	1	33979609	34630875	651267	2	114784	uc001bxm.1	113861	ENSG00000121904	CSMD2	CUB and Sushi multiple domains 2
chr1	35244171	35244331	161	*	CK6___lt__120_BAM_filter_on_data_707_peak_1305	120	.	9.11526	15.2131	12.0736	105	Promoter (2-3kb)	1	35246790	35251967	5178	1	2707	uc001bxx.3	-2459	ENSG00000188910	GJB3	gap junction protein beta 3
chr1	35318303	35318544	242	*	CK6___lt__120_BAM_filter_on_data_707_peak_1307	188	.	12.2472	22.2249	18.8145	136	3' UTR	1	35315963	35324646	8684	2	113444	uc021olc.1	6102	ENSG00000163866	SMIM12	small integral membrane protein 12
chr1	35325342	35325525	184	*	CK6___lt__120_BAM_filter_on_data_707_peak_1308	125	.	9.54589	15.6793	12.5197	111	Promoter (<=1kb)	1	35315963	35325417	9455	2	113444	uc001byb.3	0	ENSG00000163866	SMIM12	small integral membrane protein 12
chr1	35658762	35659051	290	*	CK6___lt__120_BAM_filter_on_data_707_peak_1316	205	.	12.2048	24.0063	20.5346	188	Promoter (<=1kb)	1	35649201	35658743	9543	2	6421	uc001bys.3	-19	ENSG00000116560	SFPQ	splicing factor proline and glutamine rich
chr1	36069134	36069395	262	*	CK6___lt__120_BAM_filter_on_data_707_peak_1328a	115	.	6.09996	14.6151	11.5032	53	Intron (uc001bzd.2/5690, intron 5 of 6)	1	36065143	36097138	31996	2	5690	uc021olh.1	27743	ENSG00000126067	PSMB2	proteasome subunit beta 2
chr1	36069134	36069395	262	*	CK6___lt__120_BAM_filter_on_data_707_peak_1328b	160	.	7.28285	19.3873	16.0799	166	Intron (uc001bzd.2/5690, intron 5 of 6)	1	36065143	36097138	31996	2	5690	uc021olh.1	27743	ENSG00000126067	PSMB2	proteasome subunit beta 2
chr1	36071486	36071809	324	*	CK6___lt__120_BAM_filter_on_data_707_peak_1329a	286	.	10.7814	32.3602	28.6335	167	Intron (uc001bzd.2/5690, intron 4 of 6)	1	36065143	36097138	31996	2	5690	uc021olh.1	25329	ENSG00000126067	PSMB2	proteasome subunit beta 2
chr1	36071486	36071809	324	*	CK6___lt__120_BAM_filter_on_data_707_peak_1329a	286	.	10.7814	32.3602	28.6335	167	Intron (uc001bzd.2/5690, intron 4 of 6)	1	36065143	36097138	31996	2	5690	uc021olh.1	25329	ENSG00000126067	PSMB2	proteasome subunit beta 2
chr1	36071486	36071809	324	*	CK6___lt__120_BAM_filter_on_data_707_peak_1329b	220	.	9.21757	25.5592	22.0365	304	Intron (uc001bzd.2/5690, intron 4 of 6)	1	36065143	36097138	31996	2	5690	uc021olh.1	25329	ENSG00000126067	PSMB2	proteasome subunit beta 2
chr1	36071486	36071809	324	*	CK6___lt__120_BAM_filter_on_data_707_peak_1329b	220	.	9.21757	25.5592	22.0365	304	Intron (uc001bzd.2/5690, intron 4 of 6)	1	36065143	36097138	31996	2	5690	uc021olh.1	25329	ENSG00000126067	PSMB2	proteasome subunit beta 2
chr1	36235573	36235723	151	*	CK6___lt__120_BAM_filter_on_data_707_peak_1335	230	.	14.1657	26.5556	23.0015	77	Promoter (<=1kb)	1	36197713	36235551	37839	2	63967	uc009vux.3	-22	ENSG00000092853	CLSPN	claspin
chr1	36310578	36310800	223	*	CK6___lt__120_BAM_filter_on_data_707_peak_1337b	84	.	7.40603	11.4174	8.45867	199	Intron (uc001bzj.2/192670, intron 15 of 17)	1	36335409	36389899	54491	1	26523	uc001bzk.3	-24609	ENSG00000092847	AGO1	argonaute 1, RISC catalytic component
chr1	36348637	36348784	148	*	CK6___lt__120_BAM_filter_on_data_707_peak_1339	89	.	7.48567	11.8849	8.90069	72	Promoter (<=1kb)	1	36348810	36389899	41090	1	26523	uc001bzl.3	-26	ENSG00000092847	AGO1	argonaute 1, RISC catalytic component
chr1	36614941	36615351	411	*	CK6___lt__120_BAM_filter_on_data_707_peak_1344a	604	.	17.2027	64.8724	60.4087	197	Promoter (<=1kb)	1	36602170	36615115	12946	2	27095	uc001bzx.4	0	ENSG00000054116	TRAPPC3	trafficking protein particle complex 3
chr1	36614941	36615351	411	*	CK6___lt__120_BAM_filter_on_data_707_peak_1344b	564	.	16.4324	60.7978	56.408	314	Promoter (<=1kb)	1	36602170	36615115	12946	2	27095	uc001bzx.4	0	ENSG00000054116	TRAPPC3	trafficking protein particle complex 3
chr1	36689687	36690036	350	*	CK6___lt__120_BAM_filter_on_data_707_peak_1347	384	.	15.6886	42.4272	38.434	245	Promoter (<=1kb)	1	36690017	36770957	80941	1	9967	uc001cae.4	0	ENSG00000054118	THRAP3	thyroid hormone receptor associated protein 3
chr1	36689687	36690036	350	*	CK6___lt__120_BAM_filter_on_data_707_peak_1347	384	.	15.6886	42.4272	38.434	245	Promoter (<=1kb)	1	36690017	36770957	80941	1	9967	uc001cae.4	0	ENSG00000054118	THRAP3	thyroid hormone receptor associated protein 3
chr1	36772581	36772721	141	*	CK6___lt__120_BAM_filter_on_data_707_peak_1352	164	.	11.2925	19.796	16.4735	51	Promoter (<=1kb)	1	36772708	36787379	14672	1	79729	uc010oib.1	0	ENSG00000214193	SH3D21	SH3 domain containing 21
chr1	36839489	36839653	165	*	CK6___lt__120_BAM_filter_on_data_707_peak_1353	157	.	10.1786	19.0951	15.7985	96	Intron (uc001cak.1/83931, intron 1 of 11)	1	36805225	36851485	46261	2	83931	uc001cak.1	11832	ENSG00000196182	STK40	serine/threonine kinase 40
chr1	36840315	36840468	154	*	CK6___lt__120_BAM_filter_on_data_707_peak_1354	145	.	9.66964	17.7775	14.5319	56	Intron (uc001cak.1/83931, intron 1 of 11)	1	36805225	36851485	46261	2	83931	uc001cak.1	11017	ENSG00000196182	STK40	serine/threonine kinase 40
chr1	36851554	36851826	273	*	CK6___lt__120_BAM_filter_on_data_707_peak_1355	583	.	20.7843	62.7506	58.3245	131	Promoter (<=1kb)	1	36805225	36851485	46261	2	83931	uc001cam.1	-69	ENSG00000196182	STK40	serine/threonine kinase 40
chr1	36916066	36916369	304	*	CK6___lt__120_BAM_filter_on_data_707_peak_1358	84	.	7.31861	11.3983	8.44053	99	Promoter (<=1kb)	1	36883507	36916086	32580	2	127700	uc001caq.3	0	ENSG00000116885	OSCP1	organic solute carrier partner 1
chr1	36929958	36930414	457	*	CK6___lt__120_BAM_filter_on_data_707_peak_1359a	175	.	10.6368	20.8629	17.5003	136	Promoter (<=1kb)	1	36921362	36930040	8679	2	64960	uc001cas.2	0	ENSG00000116898	MRPS15	mitochondrial ribosomal protein S15
chr1	37457245	37457472	228	*	CK6___lt__120_BAM_filter_on_data_707_peak_1376	138	.	9.49372	17.0331	13.8169	156	Intron (uc001caz.2/2899, intron 1 of 15)	1	37261128	37499844	238717	2	2899	uc001caz.2	42372	ENSG00000163873	GRIK3	glutamate ionotropic receptor kainate type subunit 3
chr1	38019858	38019999	142	*	CK6___lt__120_BAM_filter_on_data_707_peak_1387	84	.	7.47806	11.3855	8.42879	93	Promoter (<=1kb)	1	38000050	38019945	19896	2	79753	uc001cbi.4	0	ENSG00000163877	SNIP1	Smad nuclear interacting protein 1
chr1	38061493	38061697	205	*	CK6___lt__120_BAM_filter_on_data_707_peak_1389	157	.	11.0061	18.9971	15.7041	117	Promoter (<=1kb)	1	38032413	38061586	29174	2	29889	uc001cbk.3	0	ENSG00000134697	GNL2	G protein nucleolar 2
chr1	38077348	38077588	241	*	CK6___lt__120_BAM_filter_on_data_707_peak_1390	2120	.	51.7984	218.174	212.02	65	3' UTR	1	38049176	38061586	12411	2	29889	uc009vve.2	-15762	ENSG00000134697	GNL2	G protein nucleolar 2
chr1	38157933	38158202	270	*	CK6___lt__120_BAM_filter_on_data_707_peak_1393	500	.	20.2498	54.2917	50.0283	88	Promoter (<=1kb)	1	38158073	38175391	17319	1	55143	uc001cbr.4	0	ENSG00000134690	CDCA8	cell division cycle associated 8
chr1	38157933	38158202	270	*	CK6___lt__120_BAM_filter_on_data_707_peak_1393	500	.	20.2498	54.2917	50.0283	88	Promoter (<=1kb)	1	38158073	38175391	17319	1	55143	uc001cbr.4	0	ENSG00000134690	CDCA8	cell division cycle associated 8
chr1	38325282	38325504	223	*	CK6___lt__120_BAM_filter_on_data_707_peak_1398a	101	.	8.35359	13.1752	10.1288	71	Promoter (<=1kb)	1	38275239	38325292	50054	2	4520	uc001cce.1	0	ENSG00000188786	MTF1	metal regulatory transcription factor 1
chr1	38325282	38325504	223	*	CK6___lt__120_BAM_filter_on_data_707_peak_1398b	115	.	9.04973	14.6502	11.5363	178	Promoter (<=1kb)	1	38275239	38325292	50054	2	4520	uc001cce.1	0	ENSG00000188786	MTF1	metal regulatory transcription factor 1
chr1	38478072	38478448	377	*	CK6___lt__120_BAM_filter_on_data_707_peak_1405	948	.	24.9088	99.8375	94.8195	102	Promoter (<=1kb)	1	38478384	38490497	12114	1	51118	uc001ccn.4	0	ENSG00000183520	UTP11	UTP11, small subunit processome component
chr1	38478072	38478448	377	*	CK6___lt__120_BAM_filter_on_data_707_peak_1405	948	.	24.9088	99.8375	94.8195	102	Promoter (<=1kb)	1	38478384	38490497	12114	1	51118	uc001ccn.4	0	ENSG00000183520	UTP11	UTP11, small subunit processome component
chr1	38512494	38512721	228	*	CK6___lt__120_BAM_filter_on_data_707_peak_1408	228	.	13.6157	26.4169	22.8671	105	Promoter (<=1kb)	1	38509523	38512450	2928	2	5453	uc001ccp.1	-44	ENSG00000185668	POU3F1	POU class 3 homeobox 1
chr1	39325349	39325724	376	*	CK6___lt__120_BAM_filter_on_data_707_peak_1420	365	.	14.622	40.5009	36.5561	189	Promoter (<=1kb)	1	39303869	39325495	21627	2	64121	uc001ccq.3	0	ENSG00000116954	RRAGC	Ras related GTP binding C
chr1	39325349	39325724	376	*	CK6___lt__120_BAM_filter_on_data_707_peak_1420	365	.	14.622	40.5009	36.5561	189	Promoter (<=1kb)	1	39303869	39325495	21627	2	64121	uc001ccq.3	0	ENSG00000116954	RRAGC	Ras related GTP binding C
chr1	39338980	39339227	248	*	CK6___lt__120_BAM_filter_on_data_707_peak_1421	84	.	7.37987	11.3716	8.41615	69	Promoter (<=1kb)	1	39328162	39339050	10889	2	26292	uc001ccs.3	0	ENSG00000214114	MYCBP	MYC binding protein
chr1	39463363	39463742	380	*	CK6___lt__120_BAM_filter_on_data_707_peak_1425a	89	.	7.54199	11.9115	8.92579	108	Intron (uc001ccw.3/79647, intron 1 of 4)	1	39456916	39471737	14822	1	79647	uc010oiq.2	6447	ENSG00000174574	AKIRIN1	akirin 1
chr1	39463363	39463742	380	*	CK6___lt__120_BAM_filter_on_data_707_peak_1425b	114	.	8.70229	14.5175	11.4093	220	Intron (uc001ccw.3/79647, intron 1 of 4)	1	39456916	39471737	14822	1	79647	uc010oiq.2	6447	ENSG00000174574	AKIRIN1	akirin 1
chr1	39596056	39596289	234	*	CK6___lt__120_BAM_filter_on_data_707_peak_1430	208	.	12.6789	24.2954	20.8145	120	Intron (uc001cdc.2/23499, intron 1 of 61)	1	39587985	39901433	313449	1	23499	uc001cda.1	8071	ENSG00000127603	MACF1	microtubule-actin crosslinking factor 1
chr1	39639432	39639619	188	*	CK6___lt__120_BAM_filter_on_data_707_peak_1431	104	.	8.44215	13.4917	10.4311	194	Intron (uc001cdc.2/23499, intron 1 of 61)	1	39670423	39748740	78318	1	23499	uc010oit.1	-30804	ENSG00000127603	MACF1	microtubule-actin crosslinking factor 1
chr1	39655353	39655619	267	*	CK6___lt__120_BAM_filter_on_data_707_peak_1432a	158	.	10.4982	19.1593	15.8605	70	Intron (uc001cdc.2/23499, intron 1 of 61)	1	39670423	39748740	78318	1	23499	uc010oit.1	-14804	ENSG00000127603	MACF1	microtubule-actin crosslinking factor 1
chr1	39655353	39655619	267	*	CK6___lt__120_BAM_filter_on_data_707_peak_1432b	82	.	7.13767	11.2362	8.28733	240	Intron (uc001cdc.2/23499, intron 1 of 61)	1	39670423	39748740	78318	1	23499	uc010oit.1	-14804	ENSG00000127603	MACF1	microtubule-actin crosslinking factor 1
chr1	39662577	39662779	203	*	CK6___lt__120_BAM_filter_on_data_707_peak_1433	126	.	9.02095	15.8195	12.6537	128	Intron (uc001cdc.2/23499, intron 1 of 61)	1	39670423	39748740	78318	1	23499	uc010oit.1	-7644	ENSG00000127603	MACF1	microtubule-actin crosslinking factor 1
chr1	39754775	39755071	297	*	CK6___lt__120_BAM_filter_on_data_707_peak_1436b	94	.	7.71103	12.5099	9.4959	231	Intron (uc001cdc.2/23499, intron 14 of 61)	1	39765882	39790406	24525	1	23499	uc009vvq.1	-10811	ENSG00000127603	MACF1	microtubule-actin crosslinking factor 1
chr1	39759125	39759299	175	*	CK6___lt__120_BAM_filter_on_data_707_peak_1437	81	.	7.07077	11.1258	8.18268	81	Exon (uc001cdc.2/23499, exon 17 of 62)	1	39765882	39790406	24525	1	23499	uc009vvq.1	-6583	ENSG00000127603	MACF1	microtubule-actin crosslinking factor 1
chr1	39776420	39776631	212	*	CK6___lt__120_BAM_filter_on_data_707_peak_1438	203	.	12.8918	23.785	20.3209	139	Exon (uc001cdc.2/23499, exon 25 of 62)	1	39765882	39839145	73264	1	23499	uc001cdb.1	10538	ENSG00000127603	MACF1	microtubule-actin crosslinking factor 1
chr1	39864100	39864697	598	*	CK6___lt__120_BAM_filter_on_data_707_peak_1443a	133	.	6.58694	16.5087	13.314	92	Intron (uc001cdc.2/23499, intron 51 of 61)	1	39875176	39882154	6979	1	643314	uc009vvt.1	-10479	ENSG00000127603	KIAA0754	KIAA0754
chr1	39864100	39864697	598	*	CK6___lt__120_BAM_filter_on_data_707_peak_1443a	133	.	6.58694	16.5087	13.314	92	Intron (uc001cdc.2/23499, intron 51 of 61)	1	39875176	39882154	6979	1	643314	uc009vvt.1	-10479	ENSG00000127603	KIAA0754	KIAA0754
chr1	39864100	39864697	598	*	CK6___lt__120_BAM_filter_on_data_707_peak_1443b	799	.	19.7076	84.7839	79.9827	300	Intron (uc001cdc.2/23499, intron 51 of 61)	1	39875176	39882154	6979	1	643314	uc009vvt.1	-10479	ENSG00000127603	KIAA0754	KIAA0754
chr1	39864100	39864697	598	*	CK6___lt__120_BAM_filter_on_data_707_peak_1443b	799	.	19.7076	84.7839	79.9827	300	Intron (uc001cdc.2/23499, intron 51 of 61)	1	39875176	39882154	6979	1	643314	uc009vvt.1	-10479	ENSG00000127603	KIAA0754	KIAA0754
chr1	39874313	39874707	395	*	CK6___lt__120_BAM_filter_on_data_707_peak_1444a	88	.	7.49206	11.8272	8.84767	165	Promoter (<=1kb)	1	39875176	39882154	6979	1	643314	uc009vvt.1	-469	ENSG00000127603	KIAA0754	KIAA0754
chr1	39874313	39874707	395	*	CK6___lt__120_BAM_filter_on_data_707_peak_1444b	114	.	8.70229	14.5175	11.4093	286	Promoter (<=1kb)	1	39875176	39882154	6979	1	643314	uc009vvt.1	-469	ENSG00000127603	KIAA0754	KIAA0754
chr1	39960620	39960776	157	*	CK6___lt__120_BAM_filter_on_data_707_peak_1446	86	.	7.38762	11.5943	8.62732	73	Intron (uc001cdi.3/353500, intron 1 of 6)	1	39957318	39995541	38224	1	353500	uc001cdi.3	3302	ENSG00000183682	BMP8A	bone morphogenetic protein 8a
chr1	40006442	40006797	356	*	CK6___lt__120_BAM_filter_on_data_707_peak_1448a	197	.	11.7397	23.2278	19.7827	149	Intron (uc001cdk.3/728448, intron 7 of 8)	1	39987952	39991357	3406	2	728448	uc001cdj.2	-15085	NA	PPIEL	peptidylprolyl isomerase E like pseudogene
chr1	40006442	40006797	356	*	CK6___lt__120_BAM_filter_on_data_707_peak_1448b	85	.	7.125	11.5479	8.58284	329	Intron (uc001cdk.3/728448, intron 7 of 8)	1	39987952	39991357	3406	2	728448	uc001cdj.2	-15085	NA	PPIEL	peptidylprolyl isomerase E like pseudogene
chr1	40123852	40123965	114	*	CK6___lt__120_BAM_filter_on_data_707_peak_1453	97	.	7.40675	12.7614	9.73485	61	Downstream (<1kb)	1	40124793	40137710	12918	2	84618	uc001cdq.1	13745	ENSG00000116981	NT5C1A	5'-nucleotidase, cytosolic IA
chr1	40203296	40203493	198	*	CK6___lt__120_BAM_filter_on_data_707_peak_1456	99	.	8.1386	12.9441	9.90904	152	Promoter (1-2kb)	1	40204517	40222441	17925	1	10450	uc001cds.2	-1024	ENSG00000084072	PPIE	peptidylprolyl isomerase E
chr1	40251548	40251776	229	*	CK6___lt__120_BAM_filter_on_data_707_peak_1458	134	.	9.88848	16.6255	13.4263	189	Promoter (2-3kb)	1	40223903	40254533	30631	2	656	uc001cdz.1	2757	ENSG00000116985	BMP8B	bone morphogenetic protein 8b
chr1	40308635	40308867	233	*	CK6___lt__120_BAM_filter_on_data_707_peak_1460	108	.	8.7015	13.8875	10.8067	125	Intron (uc001cec.4/54802, intron 8 of 8)	1	40306706	40319740	13035	2	54802	uc001cec.4	10873	ENSG00000043514	TRIT1	tRNA isopentenyltransferase 1
chr1	40344332	40344460	129	*	CK6___lt__120_BAM_filter_on_data_707_peak_1461	169	.	11.557	20.3032	16.9623	91	Intron (uc001cek.3/54802, intron 1 of 5)	1	40306706	40349177	42472	2	54802	uc001cek.3	4717	ENSG00000043514	TRIT1	tRNA isopentenyltransferase 1
chr1	40506092	40506404	313	*	CK6___lt__120_BAM_filter_on_data_707_peak_1469	341	.	14.8308	38.0169	34.1365	137	Promoter (<=1kb)	1	40506255	40525833	19579	1	10487	uc010ojd.1	0	ENSG00000131236	CAP1	cyclase associated actin cytoskeleton regulatory protein 1
chr1	40506092	40506404	313	*	CK6___lt__120_BAM_filter_on_data_707_peak_1469	341	.	14.8308	38.0169	34.1365	137	Promoter (<=1kb)	1	40506255	40525833	19579	1	10487	uc010ojd.1	0	ENSG00000131236	CAP1	cyclase associated actin cytoskeleton regulatory protein 1
chr1	40523096	40523390	295	*	CK6___lt__120_BAM_filter_on_data_707_peak_1471	243	.	14.2077	27.9593	24.3616	171	Intron (uc010ojd.1/10487, intron 1 of 2)	1	40506255	40538321	32067	1	10487	uc010oje.2	16841	ENSG00000131236	CAP1	cyclase associated actin cytoskeleton regulatory protein 1
chr1	40626723	40627047	325	*	CK6___lt__120_BAM_filter_on_data_707_peak_1476	110	.	8.76923	14.1037	11.0136	260	Promoter (<=1kb)	1	40627041	40706593	79553	1	6018	uc001cfc.4	0	ENSG00000117000	RLF	rearranged L-myc fusion
chr1	40723645	40723888	244	*	CK6___lt__120_BAM_filter_on_data_707_peak_1478	84	.	7.47806	11.3855	8.42879	210	Promoter (<=1kb)	1	40723722	40759856	36135	1	10269	uc001cfg.4	0	ENSG00000084073	ZMPSTE24	zinc metallopeptidase STE24
chr1	40858042	40858295	254	*	CK6___lt__120_BAM_filter_on_data_707_peak_1481b	111	.	8.84892	14.2041	11.1097	206	Promoter (<=1kb)	1	40859017	40888998	29982	1	64744	uc021oma.1	-722	ENSG00000084070	SMAP2	small ArfGAP2
chr1	40915874	40916243	370	*	CK6___lt__120_BAM_filter_on_data_707_peak_1482	122	.	9.01218	15.4049	12.2569	388	Promoter (<=1kb)	1	40916337	40929390	13054	1	65243	uc001cfn.2	-94	ENSG00000187801	ZFP69B	ZFP69 zinc finger protein B
chr1	41157738	41158104	367	*	CK6___lt__120_BAM_filter_on_data_707_peak_1487	290	.	15.3419	32.7843	29.0459	79	Promoter (<=1kb)	1	41154752	41157933	3182	2	100130557	uc010ojl.1	0	NA	NFYC-AS1	NFYC antisense RNA 1
chr1	41169153	41169265	113	*	CK6___lt__120_BAM_filter_on_data_707_peak_1488	125	.	9.54589	15.6793	12.5197	246	Intron (uc010ojm.1/4802, intron 1 of 4)	1	41175038	41237276	62239	1	4802	uc001cgb.3	-5773	ENSG00000066136	NFYC	nuclear transcription factor Y subunit gamma
chr1	41445379	41445666	288	*	CK6___lt__120_BAM_filter_on_data_707_peak_1494	88	.	7.71919	11.8576	8.87656	317	Promoter (<=1kb)	1	41445007	41478235	33229	1	1503	uc010ojo.2	372	ENSG00000171793	CTPS1	CTP synthase 1
chr1	41469440	41469743	304	*	CK6___lt__120_BAM_filter_on_data_707_peak_1495	459	.	20.6249	50.1602	45.9867	169	Intron (uc001cgk.4/1503, intron 12 of 18)	1	41480262	41509562	29301	1	100507178	uc021omd.1	-10519	ENSG00000281207	SLFNL1-AS1	SLFNL1 antisense RNA 1
chr1	41588905	41589160	256	*	CK6___lt__120_BAM_filter_on_data_707_peak_1499	515	.	22.1257	55.8666	51.5718	108	Intron (uc010ojr.2/22955, intron 2 of 8)	1	41492871	41625605	132735	2	22955	uc010ojr.2	36445	ENSG00000010803	SCMH1	Scm polycomb group protein homolog 1
chr1	41621632	41621849	218	*	CK6___lt__120_BAM_filter_on_data_707_peak_1501	183	.	11.7202	21.6964	18.3056	106	Intron (uc010ojr.2/22955, intron 1 of 8)	1	41492871	41625605	132735	2	22955	uc010ojr.2	3756	ENSG00000010803	SCMH1	Scm polycomb group protein homolog 1
chr1	41621632	41621849	218	*	CK6___lt__120_BAM_filter_on_data_707_peak_1501	183	.	11.7202	21.6964	18.3056	106	Intron (uc010ojr.2/22955, intron 1 of 8)	1	41492871	41625605	132735	2	22955	uc010ojr.2	3756	ENSG00000010803	SCMH1	Scm polycomb group protein homolog 1
chr1	41980818	41981073	256	*	CK6___lt__120_BAM_filter_on_data_707_peak_1511	281	.	15.1348	31.8161	28.1053	106	Intron (uc001cgy.3/59269, intron 3 of 4)	1	41944446	41950344	5899	2	1907	uc001cgx.3	-30474	ENSG00000127129	EDN2	endothelin 2
chr1	42065907	42066266	360	*	CK6___lt__120_BAM_filter_on_data_707_peak_1512	104	.	8.44215	13.4917	10.4311	225	Intron (uc001cgz.4/59269, intron 3 of 8)	1	41972036	42050989	78954	2	59269	uc001cgy.3	-14918	ENSG00000127124	HIVEP3	human immunodeficiency virus type I enhancer binding protein 3
chr1	42083771	42084015	245	*	CK6___lt__120_BAM_filter_on_data_707_peak_1513	108	.	8.70181	13.9754	10.8915	404	Intron (uc001cgz.4/59269, intron 3 of 8)	1	41972036	42050989	78954	2	59269	uc001cgy.3	-32782	ENSG00000127124	HIVEP3	human immunodeficiency virus type I enhancer binding protein 3
chr1	42348301	42348418	118	*	CK6___lt__120_BAM_filter_on_data_707_peak_1519	145	.	10.5016	17.7588	14.5139	87	Intron (uc001cgz.4/59269, intron 1 of 8)	1	41972036	42384496	412461	2	59269	uc001cgz.4	36078	ENSG00000127124	HIVEP3	human immunodeficiency virus type I enhancer binding protein 3
chr1	42421225	42421505	281	*	CK6___lt__120_BAM_filter_on_data_707_peak_1523	373	.	15.0431	41.2675	37.3034	132	Intron (uc001chb.2/59269, intron 1 of 3)	1	41972036	42384496	412461	2	59269	uc001cha.4	-36729	ENSG00000127124	HIVEP3	human immunodeficiency virus type I enhancer binding protein 3
chr1	42421225	42421505	281	*	CK6___lt__120_BAM_filter_on_data_707_peak_1523	373	.	15.0431	41.2675	37.3034	132	Intron (uc001chb.2/59269, intron 1 of 3)	1	41972036	42384496	412461	2	59269	uc001cha.4	-36729	ENSG00000127124	HIVEP3	human immunodeficiency virus type I enhancer binding protein 3
chr1	42501628	42501801	174	*	CK6___lt__120_BAM_filter_on_data_707_peak_1525	132	.	9.75815	16.4375	13.2459	70	Promoter (<=1kb)	1	42312860	42501596	188737	2	59269	uc001chb.2	-32	ENSG00000127124	HIVEP3	human immunodeficiency virus type I enhancer binding protein 3
chr1	42928729	42928882	154	*	CK6___lt__120_BAM_filter_on_data_707_peak_1529	124	.	9.50581	15.5927	12.4366	102	Promoter (<=1kb)	1	42929025	43120335	191311	1	728621	uc001chm.2	-143	ENSG00000186409	CCDC30	coiled-coil domain containing 30
chr1	43147850	43148046	197	*	CK6___lt__120_BAM_filter_on_data_707_peak_1531	433	.	18.5547	47.4163	43.3053	100	Promoter (<=1kb)	1	43148066	43168020	19955	1	4904	uc001chs.3	-20	ENSG00000065978	YBX1	Y-box binding protein 1
chr1	43232687	43232956	270	*	CK6___lt__120_BAM_filter_on_data_707_peak_1532	633	.	24.1752	67.8432	63.3275	161	Promoter (<=1kb)	1	43212006	43232755	20750	2	64175	uc001chv.2	0	ENSG00000117385	P3H1	prolyl 3-hydroxylase 1
chr1	43312104	43312289	186	*	CK6___lt__120_BAM_filter_on_data_707_peak_1535	279	.	15.7122	31.6612	27.9546	78	Promoter (<=1kb)	1	43312244	43318146	5903	1	51058	uc001cig.3	0	ENSG00000164011	ZNF691	zinc finger protein 691
chr1	43406759	43406976	218	*	CK6___lt__120_BAM_filter_on_data_707_peak_1539	121	.	9.29967	15.2938	12.1508	115	Intron (uc001cik.2/6513, intron 2 of 9)	1	43424720	43449029	24310	1	440584	uc001cil.3	-17744	ENSG00000227533	SLC2A1-AS1	SLC2A1 antisense RNA 1
chr1	43418952	43419620	669	*	CK6___lt__120_BAM_filter_on_data_707_peak_1540a	429	.	13.895	47.0131	42.9111	213	Intron (uc001cik.2/6513, intron 1 of 9)	1	43424720	43449029	24310	1	440584	uc001cil.3	-5100	ENSG00000227533	SLC2A1-AS1	SLC2A1 antisense RNA 1
chr1	43418952	43419620	669	*	CK6___lt__120_BAM_filter_on_data_707_peak_1540a	429	.	13.895	47.0131	42.9111	213	Intron (uc001cik.2/6513, intron 1 of 9)	1	43424720	43449029	24310	1	440584	uc001cil.3	-5100	ENSG00000227533	SLC2A1-AS1	SLC2A1 antisense RNA 1
chr1	43418952	43419620	669	*	CK6___lt__120_BAM_filter_on_data_707_peak_1540a	429	.	13.895	47.0131	42.9111	213	Intron (uc001cik.2/6513, intron 1 of 9)	1	43424720	43449029	24310	1	440584	uc001cil.3	-5100	ENSG00000227533	SLC2A1-AS1	SLC2A1 antisense RNA 1
chr1	43418952	43419620	669	*	CK6___lt__120_BAM_filter_on_data_707_peak_1540b	366	.	12.5464	40.6405	36.6917	407	Intron (uc001cik.2/6513, intron 1 of 9)	1	43424720	43449029	24310	1	440584	uc001cil.3	-5100	ENSG00000227533	SLC2A1-AS1	SLC2A1 antisense RNA 1
chr1	43418952	43419620	669	*	CK6___lt__120_BAM_filter_on_data_707_peak_1540b	366	.	12.5464	40.6405	36.6917	407	Intron (uc001cik.2/6513, intron 1 of 9)	1	43424720	43449029	24310	1	440584	uc001cil.3	-5100	ENSG00000227533	SLC2A1-AS1	SLC2A1 antisense RNA 1
chr1	43418952	43419620	669	*	CK6___lt__120_BAM_filter_on_data_707_peak_1540b	366	.	12.5464	40.6405	36.6917	407	Intron (uc001cik.2/6513, intron 1 of 9)	1	43424720	43449029	24310	1	440584	uc001cil.3	-5100	ENSG00000227533	SLC2A1-AS1	SLC2A1 antisense RNA 1
chr1	43424570	43424782	213	*	CK6___lt__120_BAM_filter_on_data_707_peak_1541	238	.	13.2322	27.4122	23.8315	63	Promoter (<=1kb)	1	43424720	43449029	24310	1	440584	uc001cil.3	0	ENSG00000227533	SLC2A1-AS1	SLC2A1 antisense RNA 1
chr1	43603359	43603672	314	*	CK6___lt__120_BAM_filter_on_data_707_peak_1549	307	.	14.8041	34.5	30.7135	243	Intron (uc009vwn.1/uc009vwn.1, intron 1 of 2)	1	43613594	43622067	8474	1	440585	uc009vwo.3	-9922	ENSG00000186973	FAM183A	family with sequence similarity 183 member A
chr1	43672586	43672757	172	*	CK6___lt__120_BAM_filter_on_data_707_peak_1551	138	.	9.94522	17.0175	13.8019	170	Exon (uc010ojz.2/149465, exon 11 of 13)	1	43629845	43638241	8397	2	10969	uc010ojx.2	-34345	ENSG00000117395	EBNA1BP2	EBNA1 binding protein 2
chr1	43815221	43815353	133	*	CK6___lt__120_BAM_filter_on_data_707_peak_1555	81	.	7.33487	11.1141	8.17177	65	Intron (uc001ciw.3/4352, intron 10 of 11)	1	43824626	43828873	4248	1	991	uc001cix.3	-9273	ENSG00000117399	CDC20	cell division cycle 20
chr1	43824428	43824597	170	*	CK6___lt__120_BAM_filter_on_data_707_peak_1556	154	.	10.7199	18.7389	15.4564	168	Promoter (<=1kb)	1	43824626	43828873	4248	1	991	uc001cix.3	-29	ENSG00000117399	CDC20	cell division cycle 20
chr1	43847800	43848075	276	*	CK6___lt__120_BAM_filter_on_data_707_peak_1558	177	.	11.076	21.0811	17.7116	170	Downstream (1-2kb)	1	43849579	43855483	5905	2	112950	uc001cje.2	7408	ENSG00000159479	MED8	mediator complex subunit 8
chr1	44047980	44048079	100	*	CK6___lt__120_BAM_filter_on_data_707_peak_1566	109	.	8.70114	14.0649	10.9769	85	Intron (uc001cjr.3/5792, intron 7 of 33)	1	44056643	44089343	32701	1	5792	uc001cju.3	-8564	ENSG00000142949	PTPRF	protein tyrosine phosphatase, receptor type F
chr1	44115564	44115911	348	*	CK6___lt__120_BAM_filter_on_data_707_peak_1567	441	.	16.4477	48.3293	44.1967	178	Promoter (<=1kb)	1	44115797	44171189	55393	1	9682	uc001cjx.3	0	ENSG00000066135	KDM4A	lysine demethylase 4A
chr1	44132385	44132663	279	*	CK6___lt__120_BAM_filter_on_data_707_peak_1568	412	.	19.5149	45.2823	41.2203	172	Exon (uc001cjx.3/9682, exon 8 of 22)	1	44115797	44171189	55393	1	9682	uc010oki.2	16588	ENSG00000066135	KDM4A	lysine demethylase 4A
chr1	44173091	44173222	132	*	CK6___lt__120_BAM_filter_on_data_707_peak_1569	240	.	14.2963	27.6226	24.0359	145	Promoter (<=1kb)	1	44173204	44385889	212686	1	6487	uc010okj.2	0	ENSG00000126091	ST3GAL3	ST3 beta-galactoside alpha-2,3-sialyltransferase 3
chr1	44300727	44301077	351	*	CK6___lt__120_BAM_filter_on_data_707_peak_1570a	298	.	13.1098	33.594	29.8332	132	Intron (uc009vwu.1/6487, intron 5 of 7)	1	44398992	44402912	3921	1	9048	uc001cks.3	-97915	ENSG00000117407	ARTN	artemin
chr1	44300727	44301077	351	*	CK6___lt__120_BAM_filter_on_data_707_peak_1570b	350	.	14.5665	38.969	35.0642	257	Intron (uc009vwu.1/6487, intron 5 of 7)	1	44398992	44402912	3921	1	9048	uc001cks.3	-97915	ENSG00000117407	ARTN	artemin
chr1	44412191	44412372	182	*	CK6___lt__120_BAM_filter_on_data_707_peak_1571	241	.	14.1118	27.7918	24.1996	136	Promoter (<=1kb)	1	44412478	44433694	21217	1	9670	uc001ckx.3	-106	ENSG00000117408	IPO13	importin 13
chr1	44435423	44435633	211	*	CK6___lt__120_BAM_filter_on_data_707_peak_1572	288	.	14.0655	32.5798	28.8471	122	Promoter (<=1kb)	1	44435653	44439043	3391	1	1802	uc001ckz.3	-20	ENSG00000132768	DPH2	DPH2 homolog
chr1	44440449	44440711	263	*	CK6___lt__120_BAM_filter_on_data_707_peak_1573	191	.	10.6918	22.5856	19.1627	52	Promoter (<=1kb)	1	44440602	44443972	3371	1	533	uc001cld.3	0	ENSG00000117410	ATP6V0B	ATPase H+ transporting V0 subunit b
chr1	44793498	44793656	159	*	CK6___lt__120_BAM_filter_on_data_707_peak_1577	96	.	7.61168	12.705	9.68098	143	Intron (uc010okv.2/79033, intron 1 of 6)	1	44686742	44818597	131856	2	79033	uc010okv.2	24941	ENSG00000117419	ERI3	ERI1 exoribonuclease family member 3
chr1	44797805	44797957	153	*	CK6___lt__120_BAM_filter_on_data_707_peak_1578	121	.	8.67715	15.2517	12.1115	91	Intron (uc010okv.2/79033, intron 1 of 6)	1	44686742	44818597	131856	2	79033	uc010okv.2	20640	ENSG00000117419	ERI3	ERI1 exoribonuclease family member 3
chr1	44820918	44821117	200	*	CK6___lt__120_BAM_filter_on_data_707_peak_1579	199	.	12.7036	23.44	19.9874	69	Promoter (<=1kb)	1	44686742	44820939	134198	2	79033	uc001clt.3	0	ENSG00000117419	ERI3	ERI1 exoribonuclease family member 3
chr1	44963110	44963424	315	*	CK6___lt__120_BAM_filter_on_data_707_peak_1580	210	.	12.849	24.5892	21.0978	107	Intron (uc001clv.1/55182, intron 2 of 14)	1	45011165	45011224	60	1	100847089	uc031pmh.1	-47741	ENSG00000263381	MIR5584	microRNA 5584
chr1	45138143	45138284	142	*	CK6___lt__120_BAM_filter_on_data_707_peak_1585b	94	.	6.23925	12.4259	9.41629	176	Promoter (1-2kb)	1	45119654	45139750	20097	2	79639	uc009vxh.1	1466	ENSG00000126106	TMEM53	transmembrane protein 53
chr1	45139761	45140385	625	*	CK6___lt__120_BAM_filter_on_data_707_peak_1586a	93	.	6.21697	12.3855	9.37756	87	Promoter (<=1kb)	1	45119501	45140099	20599	2	79639	uc001cmc.3	0	ENSG00000126106	TMEM53	transmembrane protein 53
chr1	45139761	45140385	625	*	CK6___lt__120_BAM_filter_on_data_707_peak_1586a	93	.	6.21697	12.3855	9.37756	87	Promoter (<=1kb)	1	45119501	45140099	20599	2	79639	uc001cmc.3	0	ENSG00000126106	TMEM53	transmembrane protein 53
chr1	45139761	45140385	625	*	CK6___lt__120_BAM_filter_on_data_707_peak_1586a	93	.	6.21697	12.3855	9.37756	87	Promoter (<=1kb)	1	45119501	45140099	20599	2	79639	uc001cmc.3	0	ENSG00000126106	TMEM53	transmembrane protein 53
chr1	45139761	45140385	625	*	CK6___lt__120_BAM_filter_on_data_707_peak_1586b	387	.	14.299	42.7772	38.7745	472	Promoter (<=1kb)	1	45119501	45140099	20599	2	79639	uc001cmc.3	0	ENSG00000126106	TMEM53	transmembrane protein 53
chr1	45139761	45140385	625	*	CK6___lt__120_BAM_filter_on_data_707_peak_1586b	387	.	14.299	42.7772	38.7745	472	Promoter (<=1kb)	1	45119501	45140099	20599	2	79639	uc001cmc.3	0	ENSG00000126106	TMEM53	transmembrane protein 53
chr1	45139761	45140385	625	*	CK6___lt__120_BAM_filter_on_data_707_peak_1586b	387	.	14.299	42.7772	38.7745	472	Promoter (<=1kb)	1	45119501	45140099	20599	2	79639	uc001cmc.3	0	ENSG00000126106	TMEM53	transmembrane protein 53
chr1	45187090	45187526	437	*	CK6___lt__120_BAM_filter_on_data_707_peak_1587b	427	.	16.4758	46.8486	42.7501	256	Intron (uc001cmf.2/339541, intron 6 of 11)	1	45205490	45233438	27949	1	11004	uc001cmg.4	-17964	ENSG00000142945	KIF2C	kinesin family member 2C
chr1	45187090	45187526	437	*	CK6___lt__120_BAM_filter_on_data_707_peak_1587c	282	.	12.5617	31.9501	28.2355	394	Intron (uc001cmf.2/339541, intron 6 of 11)	1	45205490	45233438	27949	1	11004	uc001cmg.4	-17964	ENSG00000142945	KIF2C	kinesin family member 2C
chr1	45205318	45205523	206	*	CK6___lt__120_BAM_filter_on_data_707_peak_1590	108	.	8.66848	13.9125	10.8311	96	Promoter (<=1kb)	1	45205490	45233438	27949	1	11004	uc001cmg.4	0	ENSG00000142945	KIF2C	kinesin family member 2C
chr1	45265459	45265659	201	*	CK6___lt__120_BAM_filter_on_data_707_peak_1591	168	.	9.58159	20.1598	16.8241	111	Promoter (<=1kb)	1	45266036	45271667	5632	1	1263	uc001cmn.3	-377	ENSG00000173846	PLK3	polo like kinase 3
chr1	45273021	45273598	578	*	CK6___lt__120_BAM_filter_on_data_707_peak_1593a	388	.	12.3329	42.8933	38.8875	94	Promoter (<=1kb)	1	45271586	45272957	1372	2	343521	uc001cmp.3	-64	ENSG00000188396	TCTEX1D4	Tctex1 domain containing 4
chr1	45273021	45273598	578	*	CK6___lt__120_BAM_filter_on_data_707_peak_1593a	388	.	12.3329	42.8933	38.8875	94	Promoter (<=1kb)	1	45271586	45272957	1372	2	343521	uc001cmp.3	-64	ENSG00000188396	TCTEX1D4	Tctex1 domain containing 4
chr1	45273021	45273598	578	*	CK6___lt__120_BAM_filter_on_data_707_peak_1593b	330	.	11.147	36.9332	33.081	307	Promoter (<=1kb)	1	45271586	45272957	1372	2	343521	uc001cmp.3	-64	ENSG00000188396	TCTEX1D4	Tctex1 domain containing 4
chr1	45273021	45273598	578	*	CK6___lt__120_BAM_filter_on_data_707_peak_1593b	330	.	11.147	36.9332	33.081	307	Promoter (<=1kb)	1	45271586	45272957	1372	2	343521	uc001cmp.3	-64	ENSG00000188396	TCTEX1D4	Tctex1 domain containing 4
chr1	45273021	45273598	578	*	CK6___lt__120_BAM_filter_on_data_707_peak_1593c	82	.	5.21066	11.2059	8.25876	503	Promoter (<=1kb)	1	45271586	45272957	1372	2	343521	uc001cmp.3	-64	ENSG00000188396	TCTEX1D4	Tctex1 domain containing 4
chr1	45273021	45273598	578	*	CK6___lt__120_BAM_filter_on_data_707_peak_1593c	82	.	5.21066	11.2059	8.25876	503	Promoter (<=1kb)	1	45271586	45272957	1372	2	343521	uc001cmp.3	-64	ENSG00000188396	TCTEX1D4	Tctex1 domain containing 4
chr1	45285160	45285574	415	*	CK6___lt__120_BAM_filter_on_data_707_peak_1594	146	.	10.0092	17.895	14.6448	266	3' UTR	1	45274154	45279801	5648	1	149478	uc010ole.1	11006	ENSG00000222009	BTBD19	BTB domain containing 19
chr1	45285160	45285574	415	*	CK6___lt__120_BAM_filter_on_data_707_peak_1594	146	.	10.0092	17.895	14.6448	266	3' UTR	1	45274154	45279801	5648	1	149478	uc010ole.1	11006	ENSG00000222009	BTBD19	BTB domain containing 19
chr1	45477712	45477922	211	*	CK6___lt__120_BAM_filter_on_data_707_peak_1597	215	.	12.8305	25.0638	21.5573	176	Promoter (<=1kb)	1	45477805	45479663	1859	1	7389	uc010oli.2	0	ENSG00000126088	UROD	uroporphyrinogen decarboxylase
chr1	45769269	45769573	305	*	CK6___lt__120_BAM_filter_on_data_707_peak_1602	499	.	21.1692	54.2414	49.9791	160	Promoter (<=1kb)	1	45769582	45771291	1710	1	400752	uc010olk.2	-9	ENSG00000281912	LINC01144	long intergenic non-protein coding RNA 1144
chr1	45816236	45816373	138	*	CK6___lt__120_BAM_filter_on_data_707_peak_1604	128	.	9.7097	16.0404	12.8649	77	Intron (uc009vxr.1/10420, intron 4 of 8)	1	45794914	45806142	11229	2	4595	uc010oll.2	-10094	ENSG00000132781	MUTYH	mutY DNA glycosylase
chr1	45830747	45830919	173	*	CK6___lt__120_BAM_filter_on_data_707_peak_1605	127	.	9.66822	15.9479	12.7771	100	Intron (uc009vxr.1/10420, intron 3 of 8)	1	45794914	45806142	11229	2	4595	uc010oll.2	-24605	ENSG00000132781	MUTYH	mutY DNA glycosylase
chr1	45846974	45847654	681	*	CK6___lt__120_BAM_filter_on_data_707_peak_1606a	254	.	11.3598	29.127	25.495	217	Intron (uc009vxr.1/10420, intron 3 of 8)	1	45794914	45806142	11229	2	4595	uc010oll.2	-40832	ENSG00000132781	MUTYH	mutY DNA glycosylase
chr1	45846974	45847654	681	*	CK6___lt__120_BAM_filter_on_data_707_peak_1606a	254	.	11.3598	29.127	25.495	217	Intron (uc009vxr.1/10420, intron 3 of 8)	1	45794914	45806142	11229	2	4595	uc010oll.2	-40832	ENSG00000132781	MUTYH	mutY DNA glycosylase
chr1	45846974	45847654	681	*	CK6___lt__120_BAM_filter_on_data_707_peak_1606a	254	.	11.3598	29.127	25.495	217	Intron (uc009vxr.1/10420, intron 3 of 8)	1	45794914	45806142	11229	2	4595	uc010oll.2	-40832	ENSG00000132781	MUTYH	mutY DNA glycosylase
chr1	45846974	45847654	681	*	CK6___lt__120_BAM_filter_on_data_707_peak_1606b	279	.	12.0512	31.6725	27.9655	456	Intron (uc009vxr.1/10420, intron 3 of 8)	1	45794914	45806142	11229	2	4595	uc010oll.2	-40832	ENSG00000132781	MUTYH	mutY DNA glycosylase
chr1	45846974	45847654	681	*	CK6___lt__120_BAM_filter_on_data_707_peak_1606b	279	.	12.0512	31.6725	27.9655	456	Intron (uc009vxr.1/10420, intron 3 of 8)	1	45794914	45806142	11229	2	4595	uc010oll.2	-40832	ENSG00000132781	MUTYH	mutY DNA glycosylase
chr1	45846974	45847654	681	*	CK6___lt__120_BAM_filter_on_data_707_peak_1606b	279	.	12.0512	31.6725	27.9655	456	Intron (uc009vxr.1/10420, intron 3 of 8)	1	45794914	45806142	11229	2	4595	uc010oll.2	-40832	ENSG00000132781	MUTYH	mutY DNA glycosylase
chr1	45846974	45847654	681	*	CK6___lt__120_BAM_filter_on_data_707_peak_1606c	121	.	7.36461	15.3131	12.1693	596	Intron (uc009vxr.1/10420, intron 3 of 8)	1	45794914	45806142	11229	2	4595	uc010oll.2	-40832	ENSG00000132781	MUTYH	mutY DNA glycosylase
chr1	45846974	45847654	681	*	CK6___lt__120_BAM_filter_on_data_707_peak_1606c	121	.	7.36461	15.3131	12.1693	596	Intron (uc009vxr.1/10420, intron 3 of 8)	1	45794914	45806142	11229	2	4595	uc010oll.2	-40832	ENSG00000132781	MUTYH	mutY DNA glycosylase
chr1	45846974	45847654	681	*	CK6___lt__120_BAM_filter_on_data_707_peak_1606c	121	.	7.36461	15.3131	12.1693	596	Intron (uc009vxr.1/10420, intron 3 of 8)	1	45794914	45806142	11229	2	4595	uc010oll.2	-40832	ENSG00000132781	MUTYH	mutY DNA glycosylase
chr1	45874848	45875161	314	*	CK6___lt__120_BAM_filter_on_data_707_peak_1607a	122	.	6.26702	15.3902	12.2427	123	Intron (uc009vxr.1/10420, intron 2 of 8)	1	45809555	45923543	113989	2	10420	uc009vxr.1	48382	ENSG00000070759	TESK2	testis-specific kinase 2
chr1	45874848	45875161	314	*	CK6___lt__120_BAM_filter_on_data_707_peak_1607a	122	.	6.26702	15.3902	12.2427	123	Intron (uc009vxr.1/10420, intron 2 of 8)	1	45809555	45923543	113989	2	10420	uc009vxr.1	48382	ENSG00000070759	TESK2	testis-specific kinase 2
chr1	45874848	45875161	314	*	CK6___lt__120_BAM_filter_on_data_707_peak_1607b	290	.	10.1453	32.8128	29.0735	319	Intron (uc009vxr.1/10420, intron 2 of 8)	1	45809555	45923543	113989	2	10420	uc009vxr.1	48382	ENSG00000070759	TESK2	testis-specific kinase 2
chr1	45874848	45875161	314	*	CK6___lt__120_BAM_filter_on_data_707_peak_1607b	290	.	10.1453	32.8128	29.0735	319	Intron (uc009vxr.1/10420, intron 2 of 8)	1	45809555	45923543	113989	2	10420	uc009vxr.1	48382	ENSG00000070759	TESK2	testis-specific kinase 2
chr1	45876475	45876944	470	*	CK6___lt__120_BAM_filter_on_data_707_peak_1608a	128	.	6.34683	15.9887	12.8154	185	Intron (uc009vxr.1/10420, intron 2 of 8)	1	45809555	45923543	113989	2	10420	uc009vxr.1	46599	ENSG00000070759	TESK2	testis-specific kinase 2
chr1	45876475	45876944	470	*	CK6___lt__120_BAM_filter_on_data_707_peak_1608a	128	.	6.34683	15.9887	12.8154	185	Intron (uc009vxr.1/10420, intron 2 of 8)	1	45809555	45923543	113989	2	10420	uc009vxr.1	46599	ENSG00000070759	TESK2	testis-specific kinase 2
chr1	45876475	45876944	470	*	CK6___lt__120_BAM_filter_on_data_707_peak_1608a	128	.	6.34683	15.9887	12.8154	185	Intron (uc009vxr.1/10420, intron 2 of 8)	1	45809555	45923543	113989	2	10420	uc009vxr.1	46599	ENSG00000070759	TESK2	testis-specific kinase 2
chr1	45876475	45876944	470	*	CK6___lt__120_BAM_filter_on_data_707_peak_1608b	234	.	8.84022	26.967	23.4001	416	Intron (uc009vxr.1/10420, intron 2 of 8)	1	45809555	45923543	113989	2	10420	uc009vxr.1	46599	ENSG00000070759	TESK2	testis-specific kinase 2
chr1	45876475	45876944	470	*	CK6___lt__120_BAM_filter_on_data_707_peak_1608b	234	.	8.84022	26.967	23.4001	416	Intron (uc009vxr.1/10420, intron 2 of 8)	1	45809555	45923543	113989	2	10420	uc009vxr.1	46599	ENSG00000070759	TESK2	testis-specific kinase 2
chr1	45876475	45876944	470	*	CK6___lt__120_BAM_filter_on_data_707_peak_1608b	234	.	8.84022	26.967	23.4001	416	Intron (uc009vxr.1/10420, intron 2 of 8)	1	45809555	45923543	113989	2	10420	uc009vxr.1	46599	ENSG00000070759	TESK2	testis-specific kinase 2
chr1	45956840	45957263	424	*	CK6___lt__120_BAM_filter_on_data_707_peak_1612a	222	.	11.2177	25.8089	22.2788	85	Promoter (<=1kb)	1	45809555	45956840	147286	2	10420	uc001cns.1	0	ENSG00000070759	TESK2	testis-specific kinase 2
chr1	45956840	45957263	424	*	CK6___lt__120_BAM_filter_on_data_707_peak_1612b	353	.	15.1531	39.2954	35.3812	280	Promoter (<=1kb)	1	45809555	45956840	147286	2	10420	uc001cns.1	0	ENSG00000070759	TESK2	testis-specific kinase 2
chr1	45984723	45985015	293	*	CK6___lt__120_BAM_filter_on_data_707_peak_1616	274	.	15.0619	31.0942	27.4049	188	Promoter (2-3kb)	1	45976707	45987610	10904	2	5052	uc001coa.3	2595	ENSG00000117450	PRDX1	peroxiredoxin 1
chr1	46016431	46016800	370	*	CK6___lt__120_BAM_filter_on_data_707_peak_1618	322	.	14.9318	36.0876	32.258	149	Promoter (<=1kb)	1	46016455	46035723	19269	1	10327	uc001cod.3	0	ENSG00000117448	AKR1A1	aldo-keto reductase family 1 member A1
chr1	46049074	46049218	145	*	CK6___lt__120_BAM_filter_on_data_707_peak_1619	177	.	11.076	21.0811	17.7116	78	Promoter (<=1kb)	1	46049660	46079853	30194	1	4678	uc010olq.2	-442	ENSG00000132780	NASP	nuclear autoantigenic sperm protein
chr1	46050366	46050458	93	*	CK6___lt__120_BAM_filter_on_data_707_peak_1621	100	.	7.86379	13.1178	10.0747	45	Promoter (<=1kb)	1	46049660	46084578	34919	1	4678	uc010olr.2	706	ENSG00000132780	NASP	nuclear autoantigenic sperm protein
chr1	46152842	46152963	122	*	CK6___lt__120_BAM_filter_on_data_707_peak_1624	127	.	9.07627	15.9113	12.7418	112	Promoter (<=1kb)	1	46092976	46152302	59327	2	60313	uc001coq.3	-540	ENSG00000159592	GPBP1L1	GC-rich promoter binding protein 1 like 1
chr1	46216392	46216574	183	*	CK6___lt__120_BAM_filter_on_data_707_peak_1626	87	.	7.65746	11.7348	8.76051	86	Promoter (<=1kb)	1	46159998	46216485	56488	2	3652	uc001cos.4	0	ENSG00000197429	IPP	intracisternal A particle-promoted polypeptide
chr1	46269092	46269285	194	*	CK6___lt__120_BAM_filter_on_data_707_peak_1631	160	.	10.8777	19.386	16.0786	136	Promoter (<=1kb)	1	46269285	46501796	232512	1	23139	uc001cov.3	0	ENSG00000086015	MAST2	microtubule associated serine/threonine kinase 2
chr1	46294604	46294822	219	*	CK6___lt__120_BAM_filter_on_data_707_peak_1632	104	.	8.47025	13.4929	10.4317	145	Intron (uc001cov.3/23139, intron 2 of 28)	1	46269285	46501796	232512	1	23139	uc001cow.3	25319	ENSG00000086015	MAST2	microtubule associated serine/threonine kinase 2
chr1	46322991	46323233	243	*	CK6___lt__120_BAM_filter_on_data_707_peak_1633	82	.	7.25088	11.2121	8.26409	163	Intron (uc001cov.3/23139, intron 3 of 28)	1	46330050	46472067	142018	1	23139	uc001cox.1	-6817	ENSG00000086015	MAST2	microtubule associated serine/threonine kinase 2
chr1	46337849	46338213	365	*	CK6___lt__120_BAM_filter_on_data_707_peak_1634a	285	.	12.7457	32.2791	28.5549	79	Intron (uc001cov.3/23139, intron 3 of 28)	1	46330050	46496962	166913	1	23139	uc001coy.1	7799	ENSG00000086015	MAST2	microtubule associated serine/threonine kinase 2
chr1	46337849	46338213	365	*	CK6___lt__120_BAM_filter_on_data_707_peak_1634a	285	.	12.7457	32.2791	28.5549	79	Intron (uc001cov.3/23139, intron 3 of 28)	1	46330050	46496962	166913	1	23139	uc001coy.1	7799	ENSG00000086015	MAST2	microtubule associated serine/threonine kinase 2
chr1	46337849	46338213	365	*	CK6___lt__120_BAM_filter_on_data_707_peak_1634b	728	.	24.0347	77.5073	72.8262	220	Intron (uc001cov.3/23139, intron 3 of 28)	1	46330050	46496962	166913	1	23139	uc001coy.1	7799	ENSG00000086015	MAST2	microtubule associated serine/threonine kinase 2
chr1	46337849	46338213	365	*	CK6___lt__120_BAM_filter_on_data_707_peak_1634b	728	.	24.0347	77.5073	72.8262	220	Intron (uc001cov.3/23139, intron 3 of 28)	1	46330050	46496962	166913	1	23139	uc001coy.1	7799	ENSG00000086015	MAST2	microtubule associated serine/threonine kinase 2
chr1	46543572	46543828	257	*	CK6___lt__120_BAM_filter_on_data_707_peak_1639a	91	.	7.79276	12.1088	9.11369	111	Intron (uc001cpb.4/8503, intron 2 of 9)	1	46505812	46527810	21999	2	8503	uc010olv.2	-15762	ENSG00000117461	PIK3R3	phosphoinositide-3-kinase regulatory subunit 3
chr1	46598655	46598847	193	*	CK6___lt__120_BAM_filter_on_data_707_peak_1640	179	.	10.9406	21.3671	17.987	148	Promoter (<=1kb)	1	46505812	46598708	92897	2	8503	uc001cpc.4	0	ENSG00000117461	PIK3R3	phosphoinositide-3-kinase regulatory subunit 3
chr1	46619309	46619557	249	*	CK6___lt__120_BAM_filter_on_data_707_peak_1641	81	.	5.17546	11.133	8.18971	92	Intron (uc010olw.2/8503, intron 1 of 9)	1	46505812	46598708	92897	2	8503	uc001cpc.4	-20601	ENSG00000117461	PIK3R3	phosphoinositide-3-kinase regulatory subunit 3
chr1	46622113	46622457	345	*	CK6___lt__120_BAM_filter_on_data_707_peak_1642	452	.	13.6677	49.3965	45.24	157	Intron (uc010olw.2/8503, intron 1 of 9)	1	46640749	46651634	10886	1	10103	uc001cpd.3	-18292	ENSG00000117472	TSPAN1	tetraspanin 1
chr1	46648979	46649090	112	*	CK6___lt__120_BAM_filter_on_data_707_peak_1643	102	.	8.34874	13.3213	10.2679	85	Intron (uc001cpd.3/10103, intron 3 of 8)	1	46505812	46642160	136349	2	8503	uc010olw.2	-6819	ENSG00000117461	PIK3R3	phosphoinositide-3-kinase regulatory subunit 3
chr1	46654156	46654549	394	*	CK6___lt__120_BAM_filter_on_data_707_peak_1644a	283	.	13.3896	32.0869	28.3686	82	3' UTR	1	46655789	46658237	2449	2	55624	uc001cph.1	3688	ENSG00000085998	POMGNT1	protein O-linked mannose N-acetylglucosaminyltransferase 1 (beta 1,2-)
chr1	46654156	46654549	394	*	CK6___lt__120_BAM_filter_on_data_707_peak_1644a	283	.	13.3896	32.0869	28.3686	82	3' UTR	1	46655789	46658237	2449	2	55624	uc001cph.1	3688	ENSG00000085998	POMGNT1	protein O-linked mannose N-acetylglucosaminyltransferase 1 (beta 1,2-)
chr1	46654156	46654549	394	*	CK6___lt__120_BAM_filter_on_data_707_peak_1644b	408	.	17.0811	44.8778	40.8251	278	3' UTR	1	46655789	46658237	2449	2	55624	uc001cph.1	3688	ENSG00000085998	POMGNT1	protein O-linked mannose N-acetylglucosaminyltransferase 1 (beta 1,2-)
chr1	46654156	46654549	394	*	CK6___lt__120_BAM_filter_on_data_707_peak_1644b	408	.	17.0811	44.8778	40.8251	278	3' UTR	1	46655789	46658237	2449	2	55624	uc001cph.1	3688	ENSG00000085998	POMGNT1	protein O-linked mannose N-acetylglucosaminyltransferase 1 (beta 1,2-)
chr1	46687614	46687846	233	*	CK6___lt__120_BAM_filter_on_data_707_peak_1647a	113	.	8.43886	14.4495	11.3444	102	Promoter (1-2kb)	1	46654353	46685977	31625	2	55624	uc001cpg.3	-1637	ENSG00000085998	POMGNT1	protein O-linked mannose N-acetylglucosaminyltransferase 1 (beta 1,2-)
chr1	46687614	46687846	233	*	CK6___lt__120_BAM_filter_on_data_707_peak_1647b	204	.	12.1309	23.8821	20.4144	221	Promoter (1-2kb)	1	46654353	46685977	31625	2	55624	uc001cpg.3	-1637	ENSG00000085998	POMGNT1	protein O-linked mannose N-acetylglucosaminyltransferase 1 (beta 1,2-)
chr1	46713107	46713406	300	*	CK6___lt__120_BAM_filter_on_data_707_peak_1649	143	.	10.2376	17.544	14.3071	223	Promoter (<=1kb)	1	46713367	46744145	30779	1	8438	uc001cpl.2	0	ENSG00000085999	RAD54L	RAD54 like
chr1	46768952	46769284	333	*	CK6___lt__120_BAM_filter_on_data_707_peak_1650a	95	.	7.76013	12.5915	9.57351	69	Promoter (<=1kb)	1	46744072	46769038	24967	2	10489	uc001cpn.3	0	ENSG00000132128	LRRC41	leucine rich repeat containing 41
chr1	46768952	46769284	333	*	CK6___lt__120_BAM_filter_on_data_707_peak_1650a	95	.	7.76013	12.5915	9.57351	69	Promoter (<=1kb)	1	46744072	46769038	24967	2	10489	uc001cpn.3	0	ENSG00000132128	LRRC41	leucine rich repeat containing 41
chr1	46768952	46769284	333	*	CK6___lt__120_BAM_filter_on_data_707_peak_1650a	95	.	7.76013	12.5915	9.57351	69	Promoter (<=1kb)	1	46744072	46769038	24967	2	10489	uc001cpn.3	0	ENSG00000132128	LRRC41	leucine rich repeat containing 41
chr1	46768952	46769284	333	*	CK6___lt__120_BAM_filter_on_data_707_peak_1650b	132	.	9.39311	16.4401	13.2482	245	Promoter (<=1kb)	1	46744072	46769038	24967	2	10489	uc001cpn.3	0	ENSG00000132128	LRRC41	leucine rich repeat containing 41
chr1	46768952	46769284	333	*	CK6___lt__120_BAM_filter_on_data_707_peak_1650b	132	.	9.39311	16.4401	13.2482	245	Promoter (<=1kb)	1	46744072	46769038	24967	2	10489	uc001cpn.3	0	ENSG00000132128	LRRC41	leucine rich repeat containing 41
chr1	46768952	46769284	333	*	CK6___lt__120_BAM_filter_on_data_707_peak_1650b	132	.	9.39311	16.4401	13.2482	245	Promoter (<=1kb)	1	46744072	46769038	24967	2	10489	uc001cpn.3	0	ENSG00000132128	LRRC41	leucine rich repeat containing 41
chr1	46806595	46806837	243	*	CK6___lt__120_BAM_filter_on_data_707_peak_1652	123	.	9.25754	15.4797	12.3283	112	Promoter (<=1kb)	1	46806850	46830824	23975	1	387338	uc009vyg.2	-13	ENSG00000117481	NSUN4	NOP2/Sun RNA methyltransferase family member 4
chr1	46813857	46814001	145	*	CK6___lt__120_BAM_filter_on_data_707_peak_1654	97	.	8.15789	12.793	9.76529	113	Intron (uc001cpr.2/387338, intron 3 of 5)	1	46807508	46830824	23317	1	387338	uc001cpt.2	6349	ENSG00000117481	NSUN4	NOP2/Sun RNA methyltransferase family member 4
chr1	47022512	47022832	321	*	CK6___lt__120_BAM_filter_on_data_707_peak_1657a	127	.	8.85028	15.971	12.798	71	Intron (uc021onb.1/100507423, intron 3 of 7)	1	47011316	47016887	5572	2	148930	uc009vyh.1	-5625	ENSG00000162456	KNCN	kinocilin
chr1	47022512	47022832	321	*	CK6___lt__120_BAM_filter_on_data_707_peak_1657b	344	.	16.6701	38.3354	34.4467	260	Intron (uc021onb.1/100507423, intron 3 of 7)	1	47011316	47016887	5572	2	148930	uc009vyh.1	-5625	ENSG00000162456	KNCN	kinocilin
chr1	47112576	47112876	301	*	CK6___lt__120_BAM_filter_on_data_707_peak_1658	87	.	7.65746	11.7348	8.76051	189	Intron (uc009vyk.3/64756, intron 7 of 9)	1	47100711	47131550	30840	2	64756	uc009vyk.3	18674	ENSG00000123472	ATPAF1	ATP synthase mitochondrial F1 complex assembly factor 1
chr1	47159112	47159386	275	*	CK6___lt__120_BAM_filter_on_data_707_peak_1660	170	.	11.4333	20.3773	17.0332	168	Intron (uc010omh.1/9813, intron 4 of 10)	1	47140831	47173723	32893	2	9813	uc010omj.2	14337	ENSG00000159658	EFCAB14	EF-hand calcium binding domain 14
chr1	47159112	47159386	275	*	CK6___lt__120_BAM_filter_on_data_707_peak_1660	170	.	11.4333	20.3773	17.0332	168	Intron (uc010omh.1/9813, intron 4 of 10)	1	47140831	47173723	32893	2	9813	uc010omj.2	14337	ENSG00000159658	EFCAB14	EF-hand calcium binding domain 14
chr1	47719828	47719943	116	*	CK6___lt__120_BAM_filter_on_data_707_peak_1669	155	.	10.9745	18.8862	15.5973	61	Intron (uc001crb.1/6491, intron 1 of 1)	1	47689676	47697892	8217	2	6886	uc001cra.1	-21936	ENSG00000162367	TAL1	TAL bHLH transcription factor 1, erythroid differentiation factor
chr1	47779798	47780114	317	*	CK6___lt__120_BAM_filter_on_data_707_peak_1671	323	.	16.9527	36.1585	32.327	165	Promoter (<=1kb)	1	47694868	47779819	84952	2	6491	uc001crb.1	0	ENSG00000123473	STIL	STIL, centriolar assembly protein
chr1	48406428	48406669	242	*	CK6___lt__120_BAM_filter_on_data_707_peak_1678	100	.	8.28732	13.0444	10.0045	177	Intron (uc021ong.1/388630, intron 2 of 6)	1	48226200	48462562	236363	2	388630	uc021ong.1	55893	ENSG00000269113	TRABD2B	TraB domain containing 2B
chr1	48416766	48417088	323	*	CK6___lt__120_BAM_filter_on_data_707_peak_1679	122	.	9.42663	15.4236	12.2747	109	Intron (uc021ong.1/388630, intron 2 of 6)	1	48226200	48462562	236363	2	388630	uc021ong.1	45474	ENSG00000269113	TRABD2B	TraB domain containing 2B
chr1	48428439	48428683	245	*	CK6___lt__120_BAM_filter_on_data_707_peak_1680	82	.	7.25088	11.2121	8.26409	90	Intron (uc021ong.1/388630, intron 2 of 6)	1	48226200	48462562	236363	2	388630	uc021ong.1	33879	ENSG00000269113	TRABD2B	TraB domain containing 2B
chr1	48580349	48580580	232	*	CK6___lt__120_BAM_filter_on_data_707_peak_1688	185	.	11.2955	21.9575	18.5568	189	Intron (uc010omr.1/391037, intron 9 of 9)	1	48567387	48648100	80714	2	391037	uc010omr.1	67520	NA	SKINT1L	Skint1 like (pseudogene)
chr1	48708024	48708139	116	*	CK6___lt__120_BAM_filter_on_data_707_peak_1696	98	.	8.05654	12.8306	9.80083	71	Exon (uc001crn.2/200010, exon 14 of 15)	1	48704994	48714316	9323	1	200010	uc009vyt.1	3030	ENSG00000117834	SLC5A9	solute carrier family 5 member 9
chr1	48937889	48938041	153	*	CK6___lt__120_BAM_filter_on_data_707_peak_1699	120	.	9.3103	15.1796	12.0416	95	Promoter (<=1kb)	1	48761044	48937876	176833	2	54558	uc010omv.2	-13	ENSG00000132122	SPATA6	spermatogenesis associated 6
chr1	49013347	49013560	214	*	CK6___lt__120_BAM_filter_on_data_707_peak_1702	157	.	11.0498	19.0832	15.7873	135	Intron (uc001cru.2/84871, intron 11 of 13)	1	48761044	48937876	176833	2	54558	uc010omv.2	-75471	ENSG00000132122	SPATA6	spermatogenesis associated 6
chr1	49083054	49083296	243	*	CK6___lt__120_BAM_filter_on_data_707_peak_1703	198	.	12.6116	23.2727	19.8259	122	Intron (uc001cru.2/84871, intron 9 of 13)	1	48761044	48937876	176833	2	54558	uc010omv.2	-145178	ENSG00000132122	SPATA6	spermatogenesis associated 6
chr1	49170406	49170782	377	*	CK6___lt__120_BAM_filter_on_data_707_peak_1704	197	.	12.0412	23.2082	19.7636	125	Intron (uc001cru.2/84871, intron 6 of 13)	1	49193540	49242547	49008	2	79656	uc001crw.4	71765	ENSG00000162373	BEND5	BEN domain containing 5
chr1	49170406	49170782	377	*	CK6___lt__120_BAM_filter_on_data_707_peak_1704	197	.	12.0412	23.2082	19.7636	125	Intron (uc001cru.2/84871, intron 6 of 13)	1	49193540	49242547	49008	2	79656	uc001crw.4	71765	ENSG00000162373	BEND5	BEN domain containing 5
chr1	49309997	49310183	187	*	CK6___lt__120_BAM_filter_on_data_707_peak_1707	186	.	12.3331	22.0744	18.6691	120	Intron (uc001cru.2/84871, intron 6 of 13)	1	49193540	49242547	49008	2	79656	uc001crx.4	-67450	ENSG00000162373	BEND5	BEN domain containing 5
chr1	49564689	49564808	120	*	CK6___lt__120_BAM_filter_on_data_707_peak_1711b	116	.	6.80913	14.7479	11.6295	209	Intron (uc001cru.2/84871, intron 4 of 13)	1	49049542	49511472	461931	2	84871	uc010omy.1	-53217	ENSG00000186094	AGBL4	ATP/GTP binding protein like 4
chr1	49568461	49568775	315	*	CK6___lt__120_BAM_filter_on_data_707_peak_1714	278	.	11.2882	31.5042	27.8024	136	Intron (uc001cru.2/84871, intron 4 of 13)	1	49049542	49511472	461931	2	84871	uc010omy.1	-56989	ENSG00000186094	AGBL4	ATP/GTP binding protein like 4
chr1	49628708	49628898	191	*	CK6___lt__120_BAM_filter_on_data_707_peak_1715	103	.	8.45501	13.3782	10.3225	140	Intron (uc001cru.2/84871, intron 4 of 13)	1	49049542	49511472	461931	2	84871	uc010omy.1	-117236	ENSG00000186094	AGBL4	ATP/GTP binding protein like 4
chr1	49656842	49656975	134	*	CK6___lt__120_BAM_filter_on_data_707_peak_1717	97	.	8.15789	12.793	9.76529	57	Intron (uc001cru.2/84871, intron 4 of 13)	1	49049542	49511472	461931	2	84871	uc010omy.1	-145370	ENSG00000186094	AGBL4	ATP/GTP binding protein like 4
chr1	49662815	49663071	257	*	CK6___lt__120_BAM_filter_on_data_707_peak_1718a	101	.	8.35359	13.1752	10.1288	57	Intron (uc001cru.2/84871, intron 4 of 13)	1	49049542	49511472	461931	2	84871	uc010omy.1	-151343	ENSG00000186094	AGBL4	ATP/GTP binding protein like 4
chr1	50289968	50290328	361	*	CK6___lt__120_BAM_filter_on_data_707_peak_1725a	300	.	11.4746	33.7858	30.0198	77	Intron (uc001cru.2/84871, intron 2 of 13)	1	48998527	50489626	1491100	2	84871	uc001cru.2	199298	ENSG00000186094	AGBL4	ATP/GTP binding protein like 4
chr1	50289968	50290328	361	*	CK6___lt__120_BAM_filter_on_data_707_peak_1725a	300	.	11.4746	33.7858	30.0198	77	Intron (uc001cru.2/84871, intron 2 of 13)	1	48998527	50489626	1491100	2	84871	uc001cru.2	199298	ENSG00000186094	AGBL4	ATP/GTP binding protein like 4
chr1	50289968	50290328	361	*	CK6___lt__120_BAM_filter_on_data_707_peak_1725b	622	.	18.4714	66.7462	62.2488	244	Intron (uc001cru.2/84871, intron 2 of 13)	1	48998527	50489626	1491100	2	84871	uc001cru.2	199298	ENSG00000186094	AGBL4	ATP/GTP binding protein like 4
chr1	50289968	50290328	361	*	CK6___lt__120_BAM_filter_on_data_707_peak_1725b	622	.	18.4714	66.7462	62.2488	244	Intron (uc001cru.2/84871, intron 2 of 13)	1	48998527	50489626	1491100	2	84871	uc001cru.2	199298	ENSG00000186094	AGBL4	ATP/GTP binding protein like 4
chr1	50290554	50290673	120	*	CK6___lt__120_BAM_filter_on_data_707_peak_1726	83	.	5.65189	11.341	8.38668	109	Intron (uc001cru.2/84871, intron 2 of 13)	1	48998527	50489626	1491100	2	84871	uc001cru.2	198953	ENSG00000186094	AGBL4	ATP/GTP binding protein like 4
chr1	50482869	50483039	171	*	CK6___lt__120_BAM_filter_on_data_707_peak_1729	195	.	12.7723	22.9818	19.5449	55	Intron (uc001cru.2/84871, intron 1 of 13)	1	48998527	50489626	1491100	2	84871	uc001cru.2	6587	ENSG00000186094	AGBL4	ATP/GTP binding protein like 4
chr1	51133773	51133896	124	*	CK6___lt__120_BAM_filter_on_data_707_peak_1739	95	.	8.04337	12.5284	9.51302	224	Intron (uc009vyw.1/11124, intron 7 of 15)	1	50906935	51078170	171236	2	11124	uc010onc.1	-55603	ENSG00000185104	FAF1	Fas associated factor 1
chr1	51425998	51426165	168	*	CK6___lt__120_BAM_filter_on_data_707_peak_1743	208	.	12.6789	24.2954	20.8145	164	Promoter (<=1kb)	1	50906935	51425936	519002	2	11124	uc001cse.1	-62	ENSG00000185104	FAF1	Fas associated factor 1
chr1	51876780	51876911	132	*	CK6___lt__120_BAM_filter_on_data_707_peak_1751	147	.	10.6117	18.0371	14.7811	68	Intron (uc001csp.3/2060, intron 1 of 12)	1	51819935	51887793	67859	2	2060	uc001csp.3	10882	ENSG00000085832	EPS15	epidermal growth factor receptor pathway substrate 15
chr1	52049348	52049675	328	*	CK6___lt__120_BAM_filter_on_data_707_peak_1758	467	.	21.5542	50.9796	46.7866	109	Intron (uc001css.4/114883, intron 1 of 25)	1	52042851	52254891	212041	1	114883	uc001css.4	6497	ENSG00000117859	OSBPL9	oxysterol binding protein like 9
chr1	52064871	52065067	197	*	CK6___lt__120_BAM_filter_on_data_707_peak_1760	103	.	8.41078	13.4343	10.3768	165	Intron (uc001css.4/114883, intron 2 of 25)	1	52082546	52254891	172346	1	114883	uc001cst.4	-17479	ENSG00000117859	OSBPL9	oxysterol binding protein like 9
chr1	52082611	52082754	144	*	CK6___lt__120_BAM_filter_on_data_707_peak_1761	101	.	8.35359	13.1752	10.1288	82	Promoter (<=1kb)	1	52082546	52254891	172346	1	114883	uc009vza.3	65	ENSG00000117859	OSBPL9	oxysterol binding protein like 9
chr1	52195217	52195471	255	*	CK6___lt__120_BAM_filter_on_data_707_peak_1763	105	.	8.5056	13.6085	10.5408	89	Promoter (<=1kb)	1	52195486	52254891	59406	1	114883	uc001csy.3	-15	ENSG00000117859	OSBPL9	oxysterol binding protein like 9
chr1	52250805	52251167	363	*	CK6___lt__120_BAM_filter_on_data_707_peak_1765a	85	.	6.88888	11.5308	8.56664	91	Intron (uc001css.4/114883, intron 22 of 25)	1	52225296	52254891	29596	1	114883	uc001ctb.3	25509	ENSG00000117859	OSBPL9	oxysterol binding protein like 9
chr1	52250805	52251167	363	*	CK6___lt__120_BAM_filter_on_data_707_peak_1765b	256	.	13.2835	29.3246	25.6866	294	Intron (uc001css.4/114883, intron 22 of 25)	1	52225296	52254891	29596	1	114883	uc001ctb.3	25509	ENSG00000117859	OSBPL9	oxysterol binding protein like 9
chr1	52344420	52344569	150	*	CK6___lt__120_BAM_filter_on_data_707_peak_1767	115	.	9.04973	14.6502	11.5363	130	Promoter (<=1kb)	1	52260144	52344420	84277	2	4898	uc010ong.1	0	ENSG00000078618	NRDC	nardilysin convertase
chr1	52439200	52439666	467	*	CK6___lt__120_BAM_filter_on_data_707_peak_1768a	153	.	10.4428	18.6319	15.3526	227	Intron (uc001cth.3/5865, intron 2 of 4)	1	52373628	52456436	82809	2	5865	uc001cth.3	16770	ENSG00000169213	RAB3B	RAB3B, member RAS oncogene family
chr1	52439200	52439666	467	*	CK6___lt__120_BAM_filter_on_data_707_peak_1768b	181	.	11.6031	21.4942	18.11	386	Intron (uc001cth.3/5865, intron 2 of 4)	1	52373628	52456436	82809	2	5865	uc001cth.3	16770	ENSG00000169213	RAB3B	RAB3B, member RAS oncogene family
chr1	52521838	52522013	176	*	CK6___lt__120_BAM_filter_on_data_707_peak_1772	163	.	11.2495	19.7149	16.3953	135	Promoter (<=1kb)	1	52485804	52521843	36040	2	51060	uc001cti.4	0	ENSG00000117862	TXNDC12	thioredoxin domain containing 12
chr1	52537999	52538371	373	*	CK6___lt__120_BAM_filter_on_data_707_peak_1773a	182	.	11.3864	21.6016	18.2137	171	Intron (uc001ctk.3/91408, intron 3 of 5)	1	52521857	52556388	34532	1	91408	uc010onh.2	16142	ENSG00000134717	BTF3L4	basic transcription factor 3 like 4
chr1	52831774	52832171	398	*	CK6___lt__120_BAM_filter_on_data_707_peak_1781	186	.	11.6402	22.03	18.6268	190	Promoter (<=1kb)	1	52816265	52831877	15613	2	200014	uc001ctq.2	0	ENSG00000154222	CC2D1B	coiled-coil and C2 domain containing 1B
chr1	52870117	52870271	155	*	CK6___lt__120_BAM_filter_on_data_707_peak_1783	137	.	10.1517	16.9918	13.7773	132	Promoter (<=1kb)	1	52838501	52870143	31643	2	4998	uc001ctt.3	0	ENSG00000085840	ORC1	origin recognition complex subunit 1
chr1	53128286	53128676	391	*	CK6___lt__120_BAM_filter_on_data_707_peak_1787	153	.	10.6428	18.6003	15.3222	272	Intron (uc001cug.1/348378, intron 3 of 4)	1	53099066	53135339	36274	1	348378	uc001cuh.3	29220	ENSG00000182183	SHISAL2A	shisa like 2A
chr1	53128286	53128676	391	*	CK6___lt__120_BAM_filter_on_data_707_peak_1787	153	.	10.6428	18.6003	15.3222	272	Intron (uc001cug.1/348378, intron 3 of 4)	1	53099066	53135339	36274	1	348378	uc001cuh.3	29220	ENSG00000182183	SHISAL2A	shisa like 2A
chr1	53164017	53164147	131	*	CK6___lt__120_BAM_filter_on_data_707_peak_1788	106	.	7.97959	13.6953	10.624	79	Promoter (<=1kb)	1	53152014	53164038	12025	2	65260	uc001cui.2	0	ENSG00000162377	COA7	cytochrome c oxidase assembly factor 7 (putative)
chr1	53392870	53392989	120	*	CK6___lt__120_BAM_filter_on_data_707_peak_1799	94	.	8.00973	12.4566	9.44432	60	Promoter (<=1kb)	1	53392901	53461672	68772	1	6342	uc001cuq.2	0	ENSG00000116171	SCP2	sterol carrier protein 2
chr1	53662340	53662509	170	*	CK6___lt__120_BAM_filter_on_data_707_peak_1806	90	.	7.76894	12.0915	9.09739	104	Promoter (<=1kb)	1	53662101	53679869	17769	1	1376	uc001cvb.4	239	ENSG00000157184	CPT2	carnitine palmitoyltransferase 2
chr1	53715488	53715848	361	*	CK6___lt__120_BAM_filter_on_data_707_peak_1808a	166	.	11.1884	19.9359	16.6079	85	Intron (uc001cvh.2/7804, intron 15 of 15)	1	53692564	53704282	11719	2	4116	uc010ont.2	-11206	ENSG00000162385	MAGOH	mago homolog, exon junction complex core component
chr1	53715488	53715848	361	*	CK6___lt__120_BAM_filter_on_data_707_peak_1808a	166	.	11.1884	19.9359	16.6079	85	Intron (uc001cvh.2/7804, intron 15 of 15)	1	53692564	53704282	11719	2	4116	uc010ont.2	-11206	ENSG00000162385	MAGOH	mago homolog, exon junction complex core component
chr1	53746966	53747214	249	*	CK6___lt__120_BAM_filter_on_data_707_peak_1809	450	.	20.0458	49.1782	45.0271	82	Intron (uc001cvh.2/7804, intron 3 of 15)	1	53716362	53734270	17909	2	7804	uc001cvm.1	-12696	ENSG00000157193	LRP8	LDL receptor related protein 8
chr1	53791758	53792074	317	*	CK6___lt__120_BAM_filter_on_data_707_peak_1811	469	.	17.5503	51.1332	46.9363	200	Promoter (<=1kb)	1	53708041	53793071	85031	2	7804	uc001cvh.2	997	ENSG00000157193	LRP8	LDL receptor related protein 8
chr1	54304241	54304379	139	*	CK6___lt__120_BAM_filter_on_data_707_peak_1823	167	.	11.2688	20.0801	16.7472	105	Promoter (<=1kb)	1	54231134	54304225	73092	2	55706	uc010onv.2	-16	ENSG00000058804	NDC1	NDC1 transmembrane nucleoporin
chr1	54324735	54324940	206	*	CK6___lt__120_BAM_filter_on_data_707_peak_1824	122	.	9.42663	15.4236	12.2747	126	Intron (uc001cvu.3/54432, intron 10 of 10)	1	54231134	54304225	73092	2	55706	uc010onv.2	-20510	ENSG00000058804	NDC1	NDC1 transmembrane nucleoporin
chr1	54355531	54355662	132	*	CK6___lt__120_BAM_filter_on_data_707_peak_1825	187	.	12.4303	22.1076	18.7014	52	Promoter (<=1kb)	1	54317392	54355487	38096	2	54432	uc001cvy.3	-44	ENSG00000058799	YIPF1	Yip1 domain family member 1
chr1	54411401	54411751	351	*	CK6___lt__120_BAM_filter_on_data_707_peak_1827	354	.	16.4465	39.3674	35.451	147	Promoter (<=1kb)	1	54387234	54411288	24055	2	51668	uc001cwi.1	-113	ENSG00000081870	HSPB11	heat shock protein family B (small) member 11
chr1	54494413	54494864	452	*	CK6___lt__120_BAM_filter_on_data_707_peak_1829a	173	.	9.89938	20.6988	17.343	63	Downstream (2-3kb)	1	54472971	54483859	10889	2	388633	uc031pmq.1	-10554	ENSG00000203985	LDLRAD1	low density lipoprotein receptor class A domain containing 1
chr1	54494413	54494864	452	*	CK6___lt__120_BAM_filter_on_data_707_peak_1829a	173	.	9.89938	20.6988	17.343	63	Downstream (2-3kb)	1	54472971	54483859	10889	2	388633	uc031pmq.1	-10554	ENSG00000203985	LDLRAD1	low density lipoprotein receptor class A domain containing 1
chr1	54494413	54494864	452	*	CK6___lt__120_BAM_filter_on_data_707_peak_1829a	173	.	9.89938	20.6988	17.343	63	Downstream (2-3kb)	1	54472971	54483859	10889	2	388633	uc031pmq.1	-10554	ENSG00000203985	LDLRAD1	low density lipoprotein receptor class A domain containing 1
chr1	54494413	54494864	452	*	CK6___lt__120_BAM_filter_on_data_707_peak_1829b	185	.	10.3119	21.9441	18.5436	231	Downstream (2-3kb)	1	54472971	54483859	10889	2	388633	uc031pmq.1	-10554	ENSG00000203985	LDLRAD1	low density lipoprotein receptor class A domain containing 1
chr1	54494413	54494864	452	*	CK6___lt__120_BAM_filter_on_data_707_peak_1829b	185	.	10.3119	21.9441	18.5436	231	Downstream (2-3kb)	1	54472971	54483859	10889	2	388633	uc031pmq.1	-10554	ENSG00000203985	LDLRAD1	low density lipoprotein receptor class A domain containing 1
chr1	54494413	54494864	452	*	CK6___lt__120_BAM_filter_on_data_707_peak_1829b	185	.	10.3119	21.9441	18.5436	231	Downstream (2-3kb)	1	54472971	54483859	10889	2	388633	uc031pmq.1	-10554	ENSG00000203985	LDLRAD1	low density lipoprotein receptor class A domain containing 1
chr1	54494413	54494864	452	*	CK6___lt__120_BAM_filter_on_data_707_peak_1829c	209	.	11.1368	24.4849	20.9978	339	Downstream (2-3kb)	1	54472971	54483859	10889	2	388633	uc031pmq.1	-10554	ENSG00000203985	LDLRAD1	low density lipoprotein receptor class A domain containing 1
chr1	54494413	54494864	452	*	CK6___lt__120_BAM_filter_on_data_707_peak_1829c	209	.	11.1368	24.4849	20.9978	339	Downstream (2-3kb)	1	54472971	54483859	10889	2	388633	uc031pmq.1	-10554	ENSG00000203985	LDLRAD1	low density lipoprotein receptor class A domain containing 1
chr1	54494413	54494864	452	*	CK6___lt__120_BAM_filter_on_data_707_peak_1829c	209	.	11.1368	24.4849	20.9978	339	Downstream (2-3kb)	1	54472971	54483859	10889	2	388633	uc031pmq.1	-10554	ENSG00000203985	LDLRAD1	low density lipoprotein receptor class A domain containing 1
chr1	54518912	54519326	415	*	CK6___lt__120_BAM_filter_on_data_707_peak_1830a	275	.	14.0748	31.2896	27.5942	112	Promoter (<=1kb)	1	54519274	54565416	46143	1	127428	uc001cwt.1	0	ENSG00000116205	TCEANC2	transcription elongation factor A N-terminal and central domain containing 2
chr1	54518912	54519326	415	*	CK6___lt__120_BAM_filter_on_data_707_peak_1830a	275	.	14.0748	31.2896	27.5942	112	Promoter (<=1kb)	1	54519274	54565416	46143	1	127428	uc001cwt.1	0	ENSG00000116205	TCEANC2	transcription elongation factor A N-terminal and central domain containing 2
chr1	54518912	54519326	415	*	CK6___lt__120_BAM_filter_on_data_707_peak_1830b	195	.	11.2598	22.9765	19.5398	208	Promoter (<=1kb)	1	54519274	54565416	46143	1	127428	uc001cwt.1	0	ENSG00000116205	TCEANC2	transcription elongation factor A N-terminal and central domain containing 2
chr1	54518912	54519326	415	*	CK6___lt__120_BAM_filter_on_data_707_peak_1830b	195	.	11.2598	22.9765	19.5398	208	Promoter (<=1kb)	1	54519274	54565416	46143	1	127428	uc001cwt.1	0	ENSG00000116205	TCEANC2	transcription elongation factor A N-terminal and central domain containing 2
chr1	54518912	54519326	415	*	CK6___lt__120_BAM_filter_on_data_707_peak_1830c	249	.	13.1719	28.5157	24.9014	283	Promoter (<=1kb)	1	54519274	54565416	46143	1	127428	uc001cwt.1	0	ENSG00000116205	TCEANC2	transcription elongation factor A N-terminal and central domain containing 2
chr1	54518912	54519326	415	*	CK6___lt__120_BAM_filter_on_data_707_peak_1830c	249	.	13.1719	28.5157	24.9014	283	Promoter (<=1kb)	1	54519274	54565416	46143	1	127428	uc001cwt.1	0	ENSG00000116205	TCEANC2	transcription elongation factor A N-terminal and central domain containing 2
chr1	54653859	54654268	410	*	CK6___lt__120_BAM_filter_on_data_707_peak_1831	179	.	11.5262	21.3622	17.9825	215	Intron (uc001cww.3/606495, intron 1 of 6)	1	54638027	54661388	23362	2	606495	uc001cww.3	7120	ENSG00000215883	CYB5RL	cytochrome b5 reductase like
chr1	54665703	54665844	142	*	CK6___lt__120_BAM_filter_on_data_707_peak_1832	191	.	12.5807	22.5672	19.1447	84	Promoter (<=1kb)	1	54665840	54684056	18217	1	51253	uc001cxa.4	0	ENSG00000116221	MRPL37	mitochondrial ribosomal protein L37
chr1	54711314	54711612	299	*	CK6___lt__120_BAM_filter_on_data_707_peak_1833a	181	.	8.56121	21.5148	18.1301	91	Intron (uc001cxe.4/23648, intron 9 of 17)	1	54665840	54684056	18217	1	51253	uc009vzp.3	45474	ENSG00000116221	MRPL37	mitochondrial ribosomal protein L37
chr1	54711314	54711612	299	*	CK6___lt__120_BAM_filter_on_data_707_peak_1833a	181	.	8.56121	21.5148	18.1301	91	Intron (uc001cxe.4/23648, intron 9 of 17)	1	54665840	54684056	18217	1	51253	uc009vzp.3	45474	ENSG00000116221	MRPL37	mitochondrial ribosomal protein L37
chr1	54711314	54711612	299	*	CK6___lt__120_BAM_filter_on_data_707_peak_1833b	235	.	9.98808	27.1173	23.5455	234	Intron (uc001cxe.4/23648, intron 9 of 17)	1	54665840	54684056	18217	1	51253	uc009vzp.3	45474	ENSG00000116221	MRPL37	mitochondrial ribosomal protein L37
chr1	54711314	54711612	299	*	CK6___lt__120_BAM_filter_on_data_707_peak_1833b	235	.	9.98808	27.1173	23.5455	234	Intron (uc001cxe.4/23648, intron 9 of 17)	1	54665840	54684056	18217	1	51253	uc009vzp.3	45474	ENSG00000116221	MRPL37	mitochondrial ribosomal protein L37
chr1	54715543	54715781	239	*	CK6___lt__120_BAM_filter_on_data_707_peak_1834	169	.	8.22194	20.3297	16.9877	223	Intron (uc001cxe.4/23648, intron 9 of 17)	1	54665840	54684056	18217	1	51253	uc009vzp.3	49703	ENSG00000116221	MRPL37	mitochondrial ribosomal protein L37
chr1	54739060	54739368	309	*	CK6___lt__120_BAM_filter_on_data_707_peak_1835	294	.	14.8235	33.198	29.4477	140	Intron (uc001cxe.4/23648, intron 5 of 17)	1	54665840	54684056	18217	1	51253	uc009vzp.3	73220	ENSG00000116221	MRPL37	mitochondrial ribosomal protein L37
chr1	54752927	54753283	357	*	CK6___lt__120_BAM_filter_on_data_707_peak_1836a	159	.	9.95969	19.2279	15.9264	142	Intron (uc001cxe.4/23648, intron 4 of 17)	1	54665840	54684056	18217	1	51253	uc009vzp.3	87087	ENSG00000116221	MRPL37	mitochondrial ribosomal protein L37
chr1	54789784	54790079	296	*	CK6___lt__120_BAM_filter_on_data_707_peak_1838	142	.	10.3591	17.5297	14.2935	114	Intron (uc001cxe.4/23648, intron 4 of 17)	1	54691104	54872068	180965	2	23648	uc001cxe.4	81989	ENSG00000157216	SSBP3	single stranded DNA binding protein 3
chr1	54795146	54795275	130	*	CK6___lt__120_BAM_filter_on_data_707_peak_1839	86	.	7.56637	11.6129	8.64423	57	Intron (uc001cxe.4/23648, intron 4 of 17)	1	54691104	54872068	180965	2	23648	uc001cxe.4	76793	ENSG00000157216	SSBP3	single stranded DNA binding protein 3
chr1	54849043	54849278	236	*	CK6___lt__120_BAM_filter_on_data_707_peak_1842	118	.	9.19958	15.0008	11.8709	96	Intron (uc001cxe.4/23648, intron 4 of 17)	1	54691104	54872068	180965	2	23648	uc001cxe.4	22790	ENSG00000157216	SSBP3	single stranded DNA binding protein 3
chr1	55043410	55043547	138	*	CK6___lt__120_BAM_filter_on_data_707_peak_1849	244	.	13.2754	28.0795	24.4783	91	Intron (uc001cxj.2/26027, intron 1 of 14)	1	55013807	55100417	86611	1	26027	uc001cxm.2	29603	ENSG00000162390	ACOT11	acyl-CoA thioesterase 11
chr1	55230162	55230497	336	*	CK6___lt__120_BAM_filter_on_data_707_peak_1852	317	.	15.4406	35.575	31.7592	224	Promoter (<=1kb)	1	55222571	55230226	7656	2	25973	uc001cxy.3	0	ENSG00000162396	PARS2	prolyl-tRNA synthetase 2, mitochondrial
chr1	55260409	55260733	325	*	CK6___lt__120_BAM_filter_on_data_707_peak_1854a	137	.	8.32498	16.9901	13.776	97	Intron (uc009vzt.1/55001, intron 1 of 6)	1	55246752	55266941	20190	2	55001	uc009vzt.1	6208	ENSG00000006555	TTC22	tetratricopeptide repeat domain 22
chr1	55260409	55260733	325	*	CK6___lt__120_BAM_filter_on_data_707_peak_1854b	281	.	12.8939	31.8835	28.1709	260	Intron (uc009vzt.1/55001, intron 1 of 6)	1	55246752	55266941	20190	2	55001	uc009vzt.1	6208	ENSG00000006555	TTC22	tetratricopeptide repeat domain 22
chr1	55521113	55521404	292	*	CK6___lt__120_BAM_filter_on_data_707_peak_1859a	277	.	15.8796	31.4509	27.7505	82	Intron (uc001cyf.2/255738, intron 5 of 11)	1	55505895	55530526	24632	1	255738	uc010oom.2	15218	ENSG00000169174	PCSK9	proprotein convertase subtilisin/kexin type 9
chr1	55521113	55521404	292	*	CK6___lt__120_BAM_filter_on_data_707_peak_1859b	154	.	10.7199	18.7389	15.4564	223	Intron (uc001cyf.2/255738, intron 5 of 11)	1	55505895	55530526	24632	1	255738	uc010oom.2	15218	ENSG00000169174	PCSK9	proprotein convertase subtilisin/kexin type 9
chr1	55546936	55547167	232	*	CK6___lt__120_BAM_filter_on_data_707_peak_1861	139	.	9.55159	17.1292	13.9091	120	Exon (uc001cyg.4/23358, exon 56 of 65)	1	55505895	55530526	24632	1	255738	uc010oom.2	41041	ENSG00000169174	PCSK9	proprotein convertase subtilisin/kexin type 9
chr1	55558021	55558395	375	*	CK6___lt__120_BAM_filter_on_data_707_peak_1863	450	.	18.2161	49.1684	45.0179	214	Intron (uc001cyg.4/23358, intron 50 of 64)	1	55505895	55530526	24632	1	255738	uc010oom.2	52126	ENSG00000169174	PCSK9	proprotein convertase subtilisin/kexin type 9
chr1	55558021	55558395	375	*	CK6___lt__120_BAM_filter_on_data_707_peak_1863	450	.	18.2161	49.1684	45.0179	214	Intron (uc001cyg.4/23358, intron 50 of 64)	1	55505895	55530526	24632	1	255738	uc010oom.2	52126	ENSG00000169174	PCSK9	proprotein convertase subtilisin/kexin type 9
chr1	56046476	56046947	472	*	CK6___lt__120_BAM_filter_on_data_707_peak_1871b	178	.	11.1435	21.194	17.8202	280	5' UTR	1	55691314	55691396	83	1	100616272	uc021ony.1	355162	ENSG00000265822	MIR4422	microRNA 4422
chr1	56982538	56982935	398	*	CK6___lt__120_BAM_filter_on_data_707_peak_1897	479	.	19.9815	52.216	47.9957	237	Intron (uc001cyj.2/8613, intron 4 of 5)	1	56960419	57045257	84839	2	8613	uc001cyj.2	62322	ENSG00000162407	PLPP3	phospholipid phosphatase 3
chr1	57023280	57023728	449	*	CK6___lt__120_BAM_filter_on_data_707_peak_1900	178	.	11.4504	21.2323	17.8572	149	Intron (uc001cyj.2/8613, intron 1 of 5)	1	56960419	57045257	84839	2	8613	uc001cyj.2	21529	ENSG00000162407	PLPP3	phospholipid phosphatase 3
chr1	57284396	57284514	119	*	CK6___lt__120_BAM_filter_on_data_707_peak_1911	95	.	8.04337	12.5284	9.51302	134	Promoter (<=1kb)	1	57184477	57285369	100893	2	199920	uc001cym.4	855	ENSG00000187889	FYB2	FYN binding protein 2
chr1	57658084	57658194	111	*	CK6___lt__120_BAM_filter_on_data_707_peak_1915	89	.	7.48567	11.8849	8.90069	78	Intron (uc001cyq.1/1600, intron 1 of 13)	1	57463579	57756838	293260	2	1600	uc001cyq.1	98644	ENSG00000173406	DAB1	DAB1, reelin adaptor protein
chr1	57816360	57816696	337	*	CK6___lt__120_BAM_filter_on_data_707_peak_1917	384	.	18.6864	42.447	38.4529	148	Intron (uc001cys.1/1600, intron 3 of 16)	1	57463579	57773037	309459	2	1600	uc009vzw.1	-43323	ENSG00000173406	DAB1	DAB1, reelin adaptor protein
chr1	57955016	57955163	148	*	CK6___lt__120_BAM_filter_on_data_707_peak_1919	96	.	7.58956	12.6689	9.64759	167	Intron (uc001cys.1/1600, intron 3 of 16)	1	57476353	57888872	412520	2	1600	uc009vzx.1	-66144	ENSG00000173406	DAB1	DAB1, reelin adaptor protein
chr1	57955497	57955797	301	*	CK6___lt__120_BAM_filter_on_data_707_peak_1920a	132	.	9.10747	16.3942	13.2041	82	Intron (uc001cys.1/1600, intron 3 of 16)	1	57476353	57888872	412520	2	1600	uc009vzx.1	-66625	ENSG00000173406	DAB1	DAB1, reelin adaptor protein
chr1	57955497	57955797	301	*	CK6___lt__120_BAM_filter_on_data_707_peak_1920a	132	.	9.10747	16.3942	13.2041	82	Intron (uc001cys.1/1600, intron 3 of 16)	1	57476353	57888872	412520	2	1600	uc009vzx.1	-66625	ENSG00000173406	DAB1	DAB1, reelin adaptor protein
chr1	57955497	57955797	301	*	CK6___lt__120_BAM_filter_on_data_707_peak_1920b	85	.	7.08359	11.4806	8.51895	224	Intron (uc001cys.1/1600, intron 3 of 16)	1	57476353	57888872	412520	2	1600	uc009vzx.1	-66625	ENSG00000173406	DAB1	DAB1, reelin adaptor protein
chr1	57955497	57955797	301	*	CK6___lt__120_BAM_filter_on_data_707_peak_1920b	85	.	7.08359	11.4806	8.51895	224	Intron (uc001cys.1/1600, intron 3 of 16)	1	57476353	57888872	412520	2	1600	uc009vzx.1	-66625	ENSG00000173406	DAB1	DAB1, reelin adaptor protein
chr1	58498874	58499287	414	*	CK6___lt__120_BAM_filter_on_data_707_peak_1927a	106	.	8.43117	13.7295	10.6567	156	Intron (uc001cys.1/1600, intron 1 of 16)	1	57463579	58716211	1252633	2	1600	uc001cys.1	216924	ENSG00000173406	DAB1	DAB1, reelin adaptor protein
chr1	58498874	58499287	414	*	CK6___lt__120_BAM_filter_on_data_707_peak_1927a	106	.	8.43117	13.7295	10.6567	156	Intron (uc001cys.1/1600, intron 1 of 16)	1	57463579	58716211	1252633	2	1600	uc001cys.1	216924	ENSG00000173406	DAB1	DAB1, reelin adaptor protein
chr1	58498874	58499287	414	*	CK6___lt__120_BAM_filter_on_data_707_peak_1927b	120	.	9.06475	15.1415	12.0052	331	Intron (uc001cys.1/1600, intron 1 of 16)	1	57463579	58716211	1252633	2	1600	uc001cys.1	216924	ENSG00000173406	DAB1	DAB1, reelin adaptor protein
chr1	58498874	58499287	414	*	CK6___lt__120_BAM_filter_on_data_707_peak_1927b	120	.	9.06475	15.1415	12.0052	331	Intron (uc001cys.1/1600, intron 1 of 16)	1	57463579	58716211	1252633	2	1600	uc001cys.1	216924	ENSG00000173406	DAB1	DAB1, reelin adaptor protein
chr1	58861057	58861240	184	*	CK6___lt__120_BAM_filter_on_data_707_peak_1933	94	.	7.91013	12.4446	9.43327	164	Intron (uc001cyt.1/1600, intron 3 of 20)	1	58939504	59004982	65479	2	115209	uc001cyx.1	143742	ENSG00000162600	OMA1	OMA1 zinc metallopeptidase
chr1	59012373	59012606	234	*	CK6___lt__120_BAM_filter_on_data_707_peak_1935	87	.	7.63271	11.7663	8.78994	159	Promoter (<=1kb)	1	58946391	59012446	66056	2	115209	uc001cyy.3	0	ENSG00000162600	OMA1	OMA1 zinc metallopeptidase
chr1	59130536	59130982	447	*	CK6___lt__120_BAM_filter_on_data_707_peak_1941	444	.	18.8056	48.6217	44.4831	262	Intron (uc001cza.3/114803, intron 4 of 6)	1	59120411	59134578	14168	2	114803	uc001cza.3	3596	ENSG00000162601	MYSM1	Myb like, SWIRM and MPN domains 1
chr1	59165734	59165907	174	*	CK6___lt__120_BAM_filter_on_data_707_peak_1942a	84	.	7.50738	11.4418	8.48228	99	Promoter (<=1kb)	1	59120411	59165747	45337	2	114803	uc009wab.2	0	ENSG00000162601	MYSM1	Myb like, SWIRM and MPN domains 1
chr1	59165734	59165907	174	*	CK6___lt__120_BAM_filter_on_data_707_peak_1942b	112	.	8.90727	14.3699	11.2682	195	Promoter (<=1kb)	1	59120411	59165747	45337	2	114803	uc009wab.2	0	ENSG00000162601	MYSM1	Myb like, SWIRM and MPN domains 1
chr1	59249742	59250055	314	*	CK6___lt__120_BAM_filter_on_data_707_peak_1945a	148	.	9.84226	18.0634	14.8062	87	Promoter (<=1kb)	1	59246463	59249785	3323	2	3725	uc001cze.3	0	ENSG00000177606	JUN	Jun proto-oncogene, AP-1 transcription factor subunit
chr1	59249742	59250055	314	*	CK6___lt__120_BAM_filter_on_data_707_peak_1945a	148	.	9.84226	18.0634	14.8062	87	Promoter (<=1kb)	1	59246463	59249785	3323	2	3725	uc001cze.3	0	ENSG00000177606	JUN	Jun proto-oncogene, AP-1 transcription factor subunit
chr1	59249742	59250055	314	*	CK6___lt__120_BAM_filter_on_data_707_peak_1945b	135	.	9.32425	16.7522	13.5478	246	Promoter (<=1kb)	1	59246463	59249785	3323	2	3725	uc001cze.3	0	ENSG00000177606	JUN	Jun proto-oncogene, AP-1 transcription factor subunit
chr1	59249742	59250055	314	*	CK6___lt__120_BAM_filter_on_data_707_peak_1945b	135	.	9.32425	16.7522	13.5478	246	Promoter (<=1kb)	1	59246463	59249785	3323	2	3725	uc001cze.3	0	ENSG00000177606	JUN	Jun proto-oncogene, AP-1 transcription factor subunit
chr1	59340577	59340841	265	*	CK6___lt__120_BAM_filter_on_data_707_peak_1949a	151	.	9.18321	18.4445	15.1729	100	Intron (uc001czf.2/100131060, intron 1 of 3)	1	59250823	59365384	114562	1	100131060	uc010oop.1	89754	ENSG00000234807	LINC01135	long intergenic non-protein coding RNA 1135
chr1	59340577	59340841	265	*	CK6___lt__120_BAM_filter_on_data_707_peak_1949b	176	.	10.0663	20.9805	17.6145	206	Intron (uc001czf.2/100131060, intron 1 of 3)	1	59250823	59365384	114562	1	100131060	uc010oop.1	89754	ENSG00000234807	LINC01135	long intergenic non-protein coding RNA 1135
chr1	59342120	59342324	205	*	CK6___lt__120_BAM_filter_on_data_707_peak_1950	96	.	7.07915	12.633	9.61316	131	Intron (uc001czf.2/100131060, intron 1 of 3)	1	59250823	59365384	114562	1	100131060	uc010oop.1	91297	ENSG00000234807	LINC01135	long intergenic non-protein coding RNA 1135
chr1	59762242	59762758	517	*	CK6___lt__120_BAM_filter_on_data_707_peak_1958	277	.	13.765	31.4148	27.7157	283	Promoter (<=1kb)	1	59762625	60092526	329902	1	55277	uc001czg.2	0	ENSG00000172456	FGGY	FGGY carbohydrate kinase domain containing
chr1	59762242	59762758	517	*	CK6___lt__120_BAM_filter_on_data_707_peak_1958	277	.	13.765	31.4148	27.7157	283	Promoter (<=1kb)	1	59762625	60092526	329902	1	55277	uc001czg.2	0	ENSG00000172456	FGGY	FGGY carbohydrate kinase domain containing
chr1	59841013	59841280	268	*	CK6___lt__120_BAM_filter_on_data_707_peak_1959	91	.	7.66977	12.1285	9.13192	207	Intron (uc001czg.2/55277, intron 3 of 8)	1	59775750	60228402	452653	1	55277	uc001czl.4	65263	ENSG00000172456	FGGY	FGGY carbohydrate kinase domain containing
chr1	59841013	59841280	268	*	CK6___lt__120_BAM_filter_on_data_707_peak_1959	91	.	7.66977	12.1285	9.13192	207	Intron (uc001czg.2/55277, intron 3 of 8)	1	59775750	60228402	452653	1	55277	uc001czl.4	65263	ENSG00000172456	FGGY	FGGY carbohydrate kinase domain containing
chr1	60066622	60066866	245	*	CK6___lt__120_BAM_filter_on_data_707_peak_1968	85	.	7.53692	11.4988	8.53609	183	Intron (uc001czg.2/55277, intron 7 of 8)	1	59981301	60228402	247102	1	55277	uc001czm.5	85321	ENSG00000172456	FGGY	FGGY carbohydrate kinase domain containing
chr1	60135626	60135954	329	*	CK6___lt__120_BAM_filter_on_data_707_peak_1972	195	.	11.2902	23.0272	19.5892	261	Intron (uc001czh.2/55277, intron 14 of 16)	1	60198899	60198968	70	2	100616409	uc021oob.1	63014	ENSG00000266150	MIR4711	microRNA 4711
chr1	60135626	60135954	329	*	CK6___lt__120_BAM_filter_on_data_707_peak_1972	195	.	11.2902	23.0272	19.5892	261	Intron (uc001czh.2/55277, intron 14 of 16)	1	60198899	60198968	70	2	100616409	uc021oob.1	63014	ENSG00000266150	MIR4711	microRNA 4711
chr1	60144546	60144814	269	*	CK6___lt__120_BAM_filter_on_data_707_peak_1973	101	.	8.35359	13.1752	10.1288	192	Intron (uc001czh.2/55277, intron 15 of 16)	1	60198899	60198968	70	2	100616409	uc021oob.1	54154	ENSG00000266150	MIR4711	microRNA 4711
chr1	60209245	60209759	515	*	CK6___lt__120_BAM_filter_on_data_707_peak_1975a	149	.	9.37249	18.2557	14.9912	304	Intron (uc001czi.4/55277, intron 14 of 15)	1	60198899	60198968	70	2	100616409	uc021oob.1	-10277	ENSG00000266150	MIR4711	microRNA 4711
chr1	60209245	60209759	515	*	CK6___lt__120_BAM_filter_on_data_707_peak_1975a	149	.	9.37249	18.2557	14.9912	304	Intron (uc001czi.4/55277, intron 14 of 15)	1	60198899	60198968	70	2	100616409	uc021oob.1	-10277	ENSG00000266150	MIR4711	microRNA 4711
chr1	60209245	60209759	515	*	CK6___lt__120_BAM_filter_on_data_707_peak_1975b	161	.	9.79369	19.4639	16.1533	475	Intron (uc001czi.4/55277, intron 14 of 15)	1	60198899	60198968	70	2	100616409	uc021oob.1	-10277	ENSG00000266150	MIR4711	microRNA 4711
chr1	60209245	60209759	515	*	CK6___lt__120_BAM_filter_on_data_707_peak_1975b	161	.	9.79369	19.4639	16.1533	475	Intron (uc001czi.4/55277, intron 14 of 15)	1	60198899	60198968	70	2	100616409	uc021oob.1	-10277	ENSG00000266150	MIR4711	microRNA 4711
chr1	60218366	60218733	368	*	CK6___lt__120_BAM_filter_on_data_707_peak_1977a	159	.	9.69454	19.2989	15.9946	76	Intron (uc001czi.4/55277, intron 14 of 15)	1	60198899	60198968	70	2	100616409	uc021oob.1	-19398	ENSG00000266150	MIR4711	microRNA 4711
chr1	60218366	60218733	368	*	CK6___lt__120_BAM_filter_on_data_707_peak_1977a	159	.	9.69454	19.2989	15.9946	76	Intron (uc001czi.4/55277, intron 14 of 15)	1	60198899	60198968	70	2	100616409	uc021oob.1	-19398	ENSG00000266150	MIR4711	microRNA 4711
chr1	60218366	60218733	368	*	CK6___lt__120_BAM_filter_on_data_707_peak_1977b	103	.	7.54855	13.4039	10.3471	197	Intron (uc001czi.4/55277, intron 14 of 15)	1	60198899	60198968	70	2	100616409	uc021oob.1	-19398	ENSG00000266150	MIR4711	microRNA 4711
chr1	60218366	60218733	368	*	CK6___lt__120_BAM_filter_on_data_707_peak_1977b	103	.	7.54855	13.4039	10.3471	197	Intron (uc001czi.4/55277, intron 14 of 15)	1	60198899	60198968	70	2	100616409	uc021oob.1	-19398	ENSG00000266150	MIR4711	microRNA 4711
chr1	60280193	60280465	273	*	CK6___lt__120_BAM_filter_on_data_707_peak_1982a	84	.	7.47806	11.3855	8.42879	105	Promoter (<=1kb)	1	60280463	60342050	61588	1	51361	uc009wad.3	0	ENSG00000134709	HOOK1	hook microtubule tethering protein 1
chr1	60280193	60280465	273	*	CK6___lt__120_BAM_filter_on_data_707_peak_1982a	84	.	7.47806	11.3855	8.42879	105	Promoter (<=1kb)	1	60280463	60342050	61588	1	51361	uc009wad.3	0	ENSG00000134709	HOOK1	hook microtubule tethering protein 1
chr1	60280193	60280465	273	*	CK6___lt__120_BAM_filter_on_data_707_peak_1982b	97	.	8.12616	12.7321	9.70738	199	Promoter (<=1kb)	1	60280463	60342050	61588	1	51361	uc009wad.3	0	ENSG00000134709	HOOK1	hook microtubule tethering protein 1
chr1	60280193	60280465	273	*	CK6___lt__120_BAM_filter_on_data_707_peak_1982b	97	.	8.12616	12.7321	9.70738	199	Promoter (<=1kb)	1	60280463	60342050	61588	1	51361	uc009wad.3	0	ENSG00000134709	HOOK1	hook microtubule tethering protein 1
chr1	61542653	61542860	208	*	CK6___lt__120_BAM_filter_on_data_707_peak_1998	258	.	13.3537	29.4427	25.8011	109	Promoter (<=1kb)	1	61542946	61928460	385515	1	4774	uc001czy.3	-86	ENSG00000162599	NFIA	nuclear factor I A
chr1	61693648	61693956	309	*	CK6___lt__120_BAM_filter_on_data_707_peak_2005	95	.	8.03244	12.554	9.537	165	Intron (uc001czy.3/4774, intron 2 of 10)	1	61547980	61928460	380481	1	4774	uc001czw.3	145668	ENSG00000162599	NFIA	nuclear factor I A
chr1	61693648	61693956	309	*	CK6___lt__120_BAM_filter_on_data_707_peak_2005	95	.	8.03244	12.554	9.537	165	Intron (uc001czy.3/4774, intron 2 of 10)	1	61547980	61928460	380481	1	4774	uc001czw.3	145668	ENSG00000162599	NFIA	nuclear factor I A
chr1	61752730	61753050	321	*	CK6___lt__120_BAM_filter_on_data_707_peak_2006	400	.	15.3593	44.049	40.0157	151	Intron (uc001czy.3/4774, intron 3 of 10)	1	61869748	61928460	58713	1	4774	uc001czx.3	-116698	ENSG00000162599	NFIA	nuclear factor I A
chr1	61753318	61753719	402	*	CK6___lt__120_BAM_filter_on_data_707_peak_2007a	104	.	6.85322	13.5193	10.4573	117	Intron (uc001czy.3/4774, intron 3 of 10)	1	61869748	61928460	58713	1	4774	uc001czx.3	-116029	ENSG00000162599	NFIA	nuclear factor I A
chr1	61753318	61753719	402	*	CK6___lt__120_BAM_filter_on_data_707_peak_2007a	104	.	6.85322	13.5193	10.4573	117	Intron (uc001czy.3/4774, intron 3 of 10)	1	61869748	61928460	58713	1	4774	uc001czx.3	-116029	ENSG00000162599	NFIA	nuclear factor I A
chr1	61753318	61753719	402	*	CK6___lt__120_BAM_filter_on_data_707_peak_2007b	189	.	9.59451	22.3657	18.9508	270	Intron (uc001czy.3/4774, intron 3 of 10)	1	61869748	61928460	58713	1	4774	uc001czx.3	-116029	ENSG00000162599	NFIA	nuclear factor I A
chr1	61753318	61753719	402	*	CK6___lt__120_BAM_filter_on_data_707_peak_2007b	189	.	9.59451	22.3657	18.9508	270	Intron (uc001czy.3/4774, intron 3 of 10)	1	61869748	61928460	58713	1	4774	uc001czx.3	-116029	ENSG00000162599	NFIA	nuclear factor I A
chr1	61758991	61759201	211	*	CK6___lt__120_BAM_filter_on_data_707_peak_2008	103	.	8.45501	13.3782	10.3225	207	Intron (uc001czy.3/4774, intron 3 of 10)	1	61869748	61928460	58713	1	4774	uc001czx.3	-110547	ENSG00000162599	NFIA	nuclear factor I A
chr1	61803688	61804029	342	*	CK6___lt__120_BAM_filter_on_data_707_peak_2009	95	.	8.03244	12.554	9.537	133	Intron (uc001czy.3/4774, intron 4 of 10)	1	61869748	61928460	58713	1	4774	uc001czx.3	-65719	ENSG00000162599	NFIA	nuclear factor I A
chr1	61869617	61869844	228	*	CK6___lt__120_BAM_filter_on_data_707_peak_2010	154	.	10.4777	18.6918	15.4108	264	Promoter (<=1kb)	1	61869748	61928460	58713	1	4774	uc001czx.3	0	ENSG00000162599	NFIA	nuclear factor I A
chr1	61870052	61870175	124	*	CK6___lt__120_BAM_filter_on_data_707_peak_2010	154	.	10.4777	18.6918	15.4108	264	Promoter (<=1kb)	1	61869748	61928460	58713	1	4774	uc001czx.3	304	ENSG00000162599	NFIA	nuclear factor I A
chr1	61918369	61918595	227	*	CK6___lt__120_BAM_filter_on_data_707_peak_2011	102	.	7.71442	13.2625	10.2129	84	Intron (uc001czy.3/4774, intron 10 of 10)	1	61872234	61928460	56227	1	4774	uc009wae.3	46135	ENSG00000162599	NFIA	nuclear factor I A
chr1	61919492	61919693	202	*	CK6___lt__120_BAM_filter_on_data_707_peak_2012	126	.	8.72705	15.7686	12.6046	205	Intron (uc001czy.3/4774, intron 10 of 10)	1	61872234	61928460	56227	1	4774	uc009wae.3	47258	ENSG00000162599	NFIA	nuclear factor I A
chr1	62190899	62191088	190	*	CK6___lt__120_BAM_filter_on_data_707_peak_2017	93	.	7.97638	12.3859	9.37756	83	Promoter (<=1kb)	1	62146719	62191095	44377	2	83941	uc001czz.1	7	ENSG00000162604	TM2D1	TM2 domain containing 1
chr1	62246986	62247134	149	*	CK6___lt__120_BAM_filter_on_data_707_peak_2020	118	.	9.19681	14.9462	11.8183	125	Intron (uc009waf.1/10207, intron 7 of 35)	1	62237103	62580582	343480	1	10207	uc001dad.3	9883	ENSG00000132849	PATJ	PATJ, crumbs cell polarity complex component
chr1	62303389	62303607	219	*	CK6___lt__120_BAM_filter_on_data_707_peak_2022	114	.	8.97793	14.5082	11.4006	90	Intron (uc009waf.1/10207, intron 17 of 35)	1	62271120	62629176	358057	1	10207	uc001dac.3	32269	ENSG00000132849	PATJ	PATJ, crumbs cell polarity complex component
chr1	62459101	62459261	161	*	CK6___lt__120_BAM_filter_on_data_707_peak_2024	129	.	9.75153	16.1346	12.9552	75	Intron (uc009waf.1/10207, intron 28 of 35)	1	62439040	62580582	141543	1	10207	uc010oou.1	20061	ENSG00000132849	PATJ	PATJ, crumbs cell polarity complex component
chr1	62765576	62765985	410	*	CK6___lt__120_BAM_filter_on_data_707_peak_2029b	114	.	8.70229	14.5175	11.4093	243	Intron (uc001dah.4/163782, intron 1 of 9)	1	62701837	62785083	83247	2	163782	uc001dah.4	19098	ENSG00000132854	KANK4	KN motif and ankyrin repeat domains 4
chr1	62901982	62902431	450	*	CK6___lt__120_BAM_filter_on_data_707_peak_2034a	147	.	8.94725	18.0477	14.7914	165	Promoter (<=1kb)	1	62902383	62917475	15093	1	7398	uc001dal.2	0	ENSG00000162607	USP1	ubiquitin specific peptidase 1
chr1	62901982	62902431	450	*	CK6___lt__120_BAM_filter_on_data_707_peak_2034a	147	.	8.94725	18.0477	14.7914	165	Promoter (<=1kb)	1	62902383	62917475	15093	1	7398	uc001dal.2	0	ENSG00000162607	USP1	ubiquitin specific peptidase 1
chr1	62901982	62902431	450	*	CK6___lt__120_BAM_filter_on_data_707_peak_2034b	284	.	13.4209	32.1408	28.4204	342	Promoter (<=1kb)	1	62902383	62917475	15093	1	7398	uc001dal.2	0	ENSG00000162607	USP1	ubiquitin specific peptidase 1
chr1	62901982	62902431	450	*	CK6___lt__120_BAM_filter_on_data_707_peak_2034b	284	.	13.4209	32.1408	28.4204	342	Promoter (<=1kb)	1	62902383	62917475	15093	1	7398	uc001dal.2	0	ENSG00000162607	USP1	ubiquitin specific peptidase 1
chr1	62982342	62982659	318	*	CK6___lt__120_BAM_filter_on_data_707_peak_2037	124	.	9.44379	15.5674	12.4125	179	Intron (uc001dam.3/85440, intron 11 of 29)	1	62923209	63001303	78095	2	85440	uc010oov.1	18644	ENSG00000116641	DOCK7	dedicator of cytokinesis 7
chr1	63142631	63143072	442	*	CK6___lt__120_BAM_filter_on_data_707_peak_2040a	83	.	7.3539	11.3263	8.37253	277	Intron (uc001dan.4/85440, intron 1 of 48)	1	62920397	63154039	233643	2	85440	uc001dan.4	10967	ENSG00000116641	DOCK7	dedicator of cytokinesis 7
chr1	63148331	63148521	191	*	CK6___lt__120_BAM_filter_on_data_707_peak_2041	211	.	13.147	24.6554	21.1623	98	Intron (uc001dan.4/85440, intron 1 of 48)	1	62920397	63154039	233643	2	85440	uc001dan.4	5518	ENSG00000116641	DOCK7	dedicator of cytokinesis 7
chr1	63249332	63249678	347	*	CK6___lt__120_BAM_filter_on_data_707_peak_2045	91	.	7.84567	12.114	9.11812	118	Promoter (<=1kb)	1	63249777	63330941	81165	1	84938	uc001dat.3	-99	ENSG00000125703	ATG4C	autophagy related 4C cysteine peptidase
chr1	63249332	63249678	347	*	CK6___lt__120_BAM_filter_on_data_707_peak_2045	91	.	7.84567	12.114	9.11812	118	Promoter (<=1kb)	1	63249777	63330941	81165	1	84938	uc001dat.3	-99	ENSG00000125703	ATG4C	autophagy related 4C cysteine peptidase
chr1	63262058	63262246	189	*	CK6___lt__120_BAM_filter_on_data_707_peak_2046	90	.	7.81366	12.0485	9.05645	177	Intron (uc001dat.3/84938, intron 1 of 10)	1	63249777	63330941	81165	1	84938	uc001dau.3	12281	ENSG00000125703	ATG4C	autophagy related 4C cysteine peptidase
chr1	63710959	63711314	356	*	CK6___lt__120_BAM_filter_on_data_707_peak_2056	115	.	8.79016	14.6675	11.5524	165	Intron (uc001daw.2/199899, intron 4 of 11)	1	63624754	63782901	158148	2	199899	uc001daw.2	71587	ENSG00000224209	LINC00466	long intergenic non-protein coding RNA 466
chr1	63727406	63727668	263	*	CK6___lt__120_BAM_filter_on_data_707_peak_2058	138	.	9.98085	17.081	13.863	153	Intron (uc001daw.2/199899, intron 3 of 11)	1	63624754	63782901	158148	2	199899	uc001daw.2	55233	ENSG00000224209	LINC00466	long intergenic non-protein coding RNA 466
chr1	63727406	63727668	263	*	CK6___lt__120_BAM_filter_on_data_707_peak_2058	138	.	9.98085	17.081	13.863	153	Intron (uc001daw.2/199899, intron 3 of 11)	1	63624754	63782901	158148	2	199899	uc001daw.2	55233	ENSG00000224209	LINC00466	long intergenic non-protein coding RNA 466
chr1	63880345	63880789	445	*	CK6___lt__120_BAM_filter_on_data_707_peak_2063a	199	.	9.52962	23.3639	19.9143	101	Intron (uc021oof.1/29929, intron 10 of 14)	1	63876817	63904233	27417	1	29929	uc010oox.2	3528	ENSG00000088035	ALG6	ALG6, alpha-1,3-glucosyltransferase
chr1	63880345	63880789	445	*	CK6___lt__120_BAM_filter_on_data_707_peak_2063a	199	.	9.52962	23.3639	19.9143	101	Intron (uc021oof.1/29929, intron 10 of 14)	1	63876817	63904233	27417	1	29929	uc010oox.2	3528	ENSG00000088035	ALG6	ALG6, alpha-1,3-glucosyltransferase
chr1	63880345	63880789	445	*	CK6___lt__120_BAM_filter_on_data_707_peak_2063b	599	.	19.4123	64.4365	59.98	287	Intron (uc021oof.1/29929, intron 10 of 14)	1	63876817	63904233	27417	1	29929	uc010oox.2	3528	ENSG00000088035	ALG6	ALG6, alpha-1,3-glucosyltransferase
chr1	63880345	63880789	445	*	CK6___lt__120_BAM_filter_on_data_707_peak_2063b	599	.	19.4123	64.4365	59.98	287	Intron (uc021oof.1/29929, intron 10 of 14)	1	63876817	63904233	27417	1	29929	uc010oox.2	3528	ENSG00000088035	ALG6	ALG6, alpha-1,3-glucosyltransferase
chr1	63916257	63916490	234	*	CK6___lt__120_BAM_filter_on_data_707_peak_2066	224	.	12.3647	25.962	22.4271	111	Intron (uc001dba.2/23421, intron 7 of 8)	1	63876817	63904233	27417	1	29929	uc010oox.2	39440	ENSG00000088035	ALG6	ALG6, alpha-1,3-glucosyltransferase
chr1	63916257	63916490	234	*	CK6___lt__120_BAM_filter_on_data_707_peak_2066	224	.	12.3647	25.962	22.4271	111	Intron (uc001dba.2/23421, intron 7 of 8)	1	63876817	63904233	27417	1	29929	uc010oox.2	39440	ENSG00000088035	ALG6	ALG6, alpha-1,3-glucosyltransferase
chr1	64013212	64013625	414	*	CK6___lt__120_BAM_filter_on_data_707_peak_2067	383	.	15.2135	42.3069	38.3165	195	Promoter (1-2kb)	1	64014651	64016307	1657	1	79469	uc001dbg.1	-1026	NA	DLEU2L	deleted in lymphocytic leukemia 2-like
chr1	64013212	64013625	414	*	CK6___lt__120_BAM_filter_on_data_707_peak_2067	383	.	15.2135	42.3069	38.3165	195	Promoter (1-2kb)	1	64014651	64016307	1657	1	79469	uc001dbg.1	-1026	NA	DLEU2L	deleted in lymphocytic leukemia 2-like
chr1	64104121	64104489	369	*	CK6___lt__120_BAM_filter_on_data_707_peak_2072b	201	.	11.332	23.6589	20.1991	459	Exon (uc001dbh.3/5236, exon 7 of 11)	1	64088887	64125916	37030	1	5236	uc010ooz.2	15234	ENSG00000079739	PGM1	phosphoglucomutase 1
chr1	64104121	64104489	369	*	CK6___lt__120_BAM_filter_on_data_707_peak_2072c	128	.	8.61233	16.0354	12.86	567	Exon (uc001dbh.3/5236, exon 7 of 11)	1	64088887	64125916	37030	1	5236	uc010ooz.2	15234	ENSG00000079739	PGM1	phosphoglucomutase 1
chr1	64116915	64117086	172	*	CK6___lt__120_BAM_filter_on_data_707_peak_2073	101	.	8.35934	13.2318	10.1834	105	Intron (uc001dbh.3/5236, intron 8 of 10)	1	64088887	64125916	37030	1	5236	uc010ooz.2	28028	ENSG00000079739	PGM1	phosphoglucomutase 1
chr1	64279409	64279646	238	*	CK6___lt__120_BAM_filter_on_data_707_peak_2080	83	.	6.9622	11.2836	8.33187	175	Intron (uc001dbi.4/4919, intron 1 of 6)	1	64239690	64647179	407490	1	4919	uc001dbj.3	39719	ENSG00000185483	ROR1	receptor tyrosine kinase like orphan receptor 1
chr1	64292277	64292563	287	*	CK6___lt__120_BAM_filter_on_data_707_peak_2082	95	.	8.04337	12.5284	9.51302	164	Intron (uc001dbi.4/4919, intron 1 of 6)	1	64239690	64647179	407490	1	4919	uc001dbj.3	52587	ENSG00000185483	ROR1	receptor tyrosine kinase like orphan receptor 1
chr1	64343580	64343727	148	*	CK6___lt__120_BAM_filter_on_data_707_peak_2085	85	.	7.35296	11.495	8.53313	82	Intron (uc001dbi.4/4919, intron 1 of 6)	1	64239690	64647179	407490	1	4919	uc001dbj.3	103890	ENSG00000185483	ROR1	receptor tyrosine kinase like orphan receptor 1
chr1	64466783	64467061	279	*	CK6___lt__120_BAM_filter_on_data_707_peak_2089a	91	.	5.67375	12.1444	9.14771	96	Intron (uc001dbi.4/4919, intron 1 of 6)	1	64669490	64710027	40538	1	148581	uc001dbn.1	-202429	ENSG00000177414	UBE2U	ubiquitin conjugating enzyme E2 U (putative)
chr1	64466783	64467061	279	*	CK6___lt__120_BAM_filter_on_data_707_peak_2089a	91	.	5.67375	12.1444	9.14771	96	Intron (uc001dbi.4/4919, intron 1 of 6)	1	64669490	64710027	40538	1	148581	uc001dbn.1	-202429	ENSG00000177414	UBE2U	ubiquitin conjugating enzyme E2 U (putative)
chr1	64470267	64470824	558	*	CK6___lt__120_BAM_filter_on_data_707_peak_2090a	250	.	9.87324	28.6458	25.0279	113	Intron (uc001dbi.4/4919, intron 1 of 6)	1	64669490	64710027	40538	1	148581	uc001dbn.1	-198666	ENSG00000177414	UBE2U	ubiquitin conjugating enzyme E2 U (putative)
chr1	64470267	64470824	558	*	CK6___lt__120_BAM_filter_on_data_707_peak_2090a	250	.	9.87324	28.6458	25.0279	113	Intron (uc001dbi.4/4919, intron 1 of 6)	1	64669490	64710027	40538	1	148581	uc001dbn.1	-198666	ENSG00000177414	UBE2U	ubiquitin conjugating enzyme E2 U (putative)
chr1	64470267	64470824	558	*	CK6___lt__120_BAM_filter_on_data_707_peak_2090a	250	.	9.87324	28.6458	25.0279	113	Intron (uc001dbi.4/4919, intron 1 of 6)	1	64669490	64710027	40538	1	148581	uc001dbn.1	-198666	ENSG00000177414	UBE2U	ubiquitin conjugating enzyme E2 U (putative)
chr1	64470267	64470824	558	*	CK6___lt__120_BAM_filter_on_data_707_peak_2090b	187	.	8.3517	22.1462	18.7387	341	Intron (uc001dbi.4/4919, intron 1 of 6)	1	64669490	64710027	40538	1	148581	uc001dbn.1	-198666	ENSG00000177414	UBE2U	ubiquitin conjugating enzyme E2 U (putative)
chr1	64470267	64470824	558	*	CK6___lt__120_BAM_filter_on_data_707_peak_2090b	187	.	8.3517	22.1462	18.7387	341	Intron (uc001dbi.4/4919, intron 1 of 6)	1	64669490	64710027	40538	1	148581	uc001dbn.1	-198666	ENSG00000177414	UBE2U	ubiquitin conjugating enzyme E2 U (putative)
chr1	64470267	64470824	558	*	CK6___lt__120_BAM_filter_on_data_707_peak_2090b	187	.	8.3517	22.1462	18.7387	341	Intron (uc001dbi.4/4919, intron 1 of 6)	1	64669490	64710027	40538	1	148581	uc001dbn.1	-198666	ENSG00000177414	UBE2U	ubiquitin conjugating enzyme E2 U (putative)
chr1	64505150	64505578	429	*	CK6___lt__120_BAM_filter_on_data_707_peak_2093a	123	.	8.80623	15.4644	12.3137	61	Intron (uc001dbi.4/4919, intron 2 of 6)	1	64669490	64710027	40538	1	148581	uc001dbn.1	-163912	ENSG00000177414	UBE2U	ubiquitin conjugating enzyme E2 U (putative)
chr1	64505150	64505578	429	*	CK6___lt__120_BAM_filter_on_data_707_peak_2093a	123	.	8.80623	15.4644	12.3137	61	Intron (uc001dbi.4/4919, intron 2 of 6)	1	64669490	64710027	40538	1	148581	uc001dbn.1	-163912	ENSG00000177414	UBE2U	ubiquitin conjugating enzyme E2 U (putative)
chr1	64505150	64505578	429	*	CK6___lt__120_BAM_filter_on_data_707_peak_2093b	99	.	7.77021	12.9643	9.92847	259	Intron (uc001dbi.4/4919, intron 2 of 6)	1	64669490	64710027	40538	1	148581	uc001dbn.1	-163912	ENSG00000177414	UBE2U	ubiquitin conjugating enzyme E2 U (putative)
chr1	64505150	64505578	429	*	CK6___lt__120_BAM_filter_on_data_707_peak_2093b	99	.	7.77021	12.9643	9.92847	259	Intron (uc001dbi.4/4919, intron 2 of 6)	1	64669490	64710027	40538	1	148581	uc001dbn.1	-163912	ENSG00000177414	UBE2U	ubiquitin conjugating enzyme E2 U (putative)
chr1	64537708	64537901	194	*	CK6___lt__120_BAM_filter_on_data_707_peak_2094	218	.	13.295	25.3688	21.8522	94	Intron (uc001dbi.4/4919, intron 4 of 6)	1	64669490	64710027	40538	1	148581	uc001dbn.1	-131589	ENSG00000177414	UBE2U	ubiquitin conjugating enzyme E2 U (putative)
chr1	64696845	64697127	283	*	CK6___lt__120_BAM_filter_on_data_707_peak_2101	376	.	18.1846	41.5944	37.6222	168	Intron (uc001dbn.1/148581, intron 6 of 8)	1	64669490	64710027	40538	1	148581	uc001dbn.1	27355	ENSG00000177414	UBE2U	ubiquitin conjugating enzyme E2 U (putative)
chr1	65009519	65009866	348	*	CK6___lt__120_BAM_filter_on_data_707_peak_2110a	138	.	8.07183	17.0392	13.8228	109	Intron (uc001dbo.1/57685, intron 1 of 26)	1	65029360	65158741	129382	1	57685	uc001dbq.1	-19494	ENSG00000158966	CACHD1	cache domain containing 1
chr1	65009519	65009866	348	*	CK6___lt__120_BAM_filter_on_data_707_peak_2110b	382	.	15.1519	42.1947	38.2072	266	Intron (uc001dbo.1/57685, intron 1 of 26)	1	65029360	65158741	129382	1	57685	uc001dbq.1	-19494	ENSG00000158966	CACHD1	cache domain containing 1
chr1	65383105	65383377	273	*	CK6___lt__120_BAM_filter_on_data_707_peak_2114a	173	.	11.6026	20.6869	17.3317	78	Intron (uc001dbu.1/3716, intron 1 of 24)	1	65298906	65432187	133282	2	3716	uc001dbu.1	48810	ENSG00000162434	JAK1	Janus kinase 1
chr1	65383105	65383377	273	*	CK6___lt__120_BAM_filter_on_data_707_peak_2114b	103	.	8.37965	13.3775	10.322	203	Intron (uc001dbu.1/3716, intron 1 of 24)	1	65298906	65432187	133282	2	3716	uc001dbu.1	48810	ENSG00000162434	JAK1	Janus kinase 1
chr1	65640281	65640523	243	*	CK6___lt__120_BAM_filter_on_data_707_peak_2122	170	.	10.3494	20.3864	17.0419	74	Intron (uc001dby.3/205, intron 2 of 5)	1	65613850	65697828	83979	1	205	uc001dca.3	26431	ENSG00000162433	AK4	adenylate kinase 4
chr1	65885939	65886260	322	*	CK6___lt__120_BAM_filter_on_data_707_peak_2128	277	.	13.765	31.4148	27.7157	194	Promoter (<=1kb)	1	65886131	66096095	209965	1	3953	uc001dcg.3	0	ENSG00000116678	LEPR	leptin receptor
chr1	66286755	66286922	168	*	CK6___lt__120_BAM_filter_on_data_707_peak_2131	99	.	8.25129	12.985	9.94803	60	Intron (uc001dcn.3/5142, intron 1 of 16)	1	66258856	66840262	581407	1	5142	uc001dco.3	27899	ENSG00000184588	PDE4B	phosphodiesterase 4B
chr1	66430912	66431486	575	*	CK6___lt__120_BAM_filter_on_data_707_peak_2133a	214	.	11.407	24.9435	21.4408	102	Intron (uc001dcn.3/5142, intron 3 of 16)	1	66458390	66840262	381873	1	5142	uc001dcp.3	-26904	ENSG00000184588	PDE4B	phosphodiesterase 4B
chr1	66430912	66431486	575	*	CK6___lt__120_BAM_filter_on_data_707_peak_2133a	214	.	11.407	24.9435	21.4408	102	Intron (uc001dcn.3/5142, intron 3 of 16)	1	66458390	66840262	381873	1	5142	uc001dcp.3	-26904	ENSG00000184588	PDE4B	phosphodiesterase 4B
chr1	66430912	66431486	575	*	CK6___lt__120_BAM_filter_on_data_707_peak_2133a	214	.	11.407	24.9435	21.4408	102	Intron (uc001dcn.3/5142, intron 3 of 16)	1	66458390	66840262	381873	1	5142	uc001dcp.3	-26904	ENSG00000184588	PDE4B	phosphodiesterase 4B
chr1	66430912	66431486	575	*	CK6___lt__120_BAM_filter_on_data_707_peak_2133b	153	.	9.29463	18.6313	15.3523	487	Intron (uc001dcn.3/5142, intron 3 of 16)	1	66458390	66840262	381873	1	5142	uc001dcp.3	-26904	ENSG00000184588	PDE4B	phosphodiesterase 4B
chr1	66430912	66431486	575	*	CK6___lt__120_BAM_filter_on_data_707_peak_2133b	153	.	9.29463	18.6313	15.3523	487	Intron (uc001dcn.3/5142, intron 3 of 16)	1	66458390	66840262	381873	1	5142	uc001dcp.3	-26904	ENSG00000184588	PDE4B	phosphodiesterase 4B
chr1	66430912	66431486	575	*	CK6___lt__120_BAM_filter_on_data_707_peak_2133b	153	.	9.29463	18.6313	15.3523	487	Intron (uc001dcn.3/5142, intron 3 of 16)	1	66458390	66840262	381873	1	5142	uc001dcp.3	-26904	ENSG00000184588	PDE4B	phosphodiesterase 4B
chr1	66444910	66445147	238	*	CK6___lt__120_BAM_filter_on_data_707_peak_2134	447	.	20.7584	48.8707	44.7267	123	Intron (uc001dcn.3/5142, intron 3 of 16)	1	66458390	66840262	381873	1	5142	uc001dcp.3	-13243	ENSG00000184588	PDE4B	phosphodiesterase 4B
chr1	66706184	66706473	290	*	CK6___lt__120_BAM_filter_on_data_707_peak_2139	326	.	14.376	36.5175	32.6766	121	Intron (uc001dcn.3/5142, intron 3 of 16)	1	66797793	66840262	42470	1	5142	uc001dcq.3	-91320	ENSG00000184588	PDE4B	phosphodiesterase 4B
chr1	66710264	66710381	118	*	CK6___lt__120_BAM_filter_on_data_707_peak_2141	130	.	7.91227	16.2773	13.0924	89	Intron (uc001dcn.3/5142, intron 3 of 16)	1	66797793	66840262	42470	1	5142	uc001dcq.3	-87412	ENSG00000184588	PDE4B	phosphodiesterase 4B
chr1	66724249	66724386	138	*	CK6___lt__120_BAM_filter_on_data_707_peak_2144	157	.	8.08961	19.0576	15.7623	63	Intron (uc001dcn.3/5142, intron 6 of 16)	1	66797793	66840262	42470	1	5142	uc001dcq.3	-73407	ENSG00000184588	PDE4B	phosphodiesterase 4B
chr1	66727190	66727356	167	*	CK6___lt__120_BAM_filter_on_data_707_peak_2145	103	.	6.31966	13.3964	10.3401	84	Intron (uc001dcn.3/5142, intron 6 of 16)	1	66797793	66840262	42470	1	5142	uc001dcq.3	-70437	ENSG00000184588	PDE4B	phosphodiesterase 4B
chr1	66736993	66737250	258	*	CK6___lt__120_BAM_filter_on_data_707_peak_2146	248	.	12.018	28.4252	24.8135	178	Intron (uc001dcn.3/5142, intron 7 of 16)	1	66797793	66840262	42470	1	5142	uc001dcq.3	-60543	ENSG00000184588	PDE4B	phosphodiesterase 4B
chr1	66758789	66758966	178	*	CK6___lt__120_BAM_filter_on_data_707_peak_2149	161	.	10.4223	19.4999	16.1882	61	Intron (uc001dcn.3/5142, intron 7 of 16)	1	66797793	66840262	42470	1	5142	uc001dcq.3	-38827	ENSG00000184588	PDE4B	phosphodiesterase 4B
chr1	66788051	66788402	352	*	CK6___lt__120_BAM_filter_on_data_707_peak_2151	299	.	15.8724	33.6849	29.9216	272	Intron (uc001dcn.3/5142, intron 7 of 16)	1	66797793	66840262	42470	1	5142	uc001dcq.3	-9391	ENSG00000184588	PDE4B	phosphodiesterase 4B
chr1	66796657	66796840	184	*	CK6___lt__120_BAM_filter_on_data_707_peak_2152	104	.	7.88919	13.5476	10.4847	64	Promoter (<=1kb)	1	66797793	66840262	42470	1	5142	uc001dcq.3	-953	ENSG00000184588	PDE4B	phosphodiesterase 4B
chr1	67030050	67030321	272	*	CK6___lt__120_BAM_filter_on_data_707_peak_2168	183	.	11.4938	21.7826	18.3883	176	Intron (uc001dcr.3/84251, intron 1 of 24)	1	66999825	67210768	210944	1	84251	uc001dcr.3	30225	ENSG00000118473	SGIP1	SH3 domain GRB2 like endophilin interacting protein 1
chr1	67042476	67042607	132	*	CK6___lt__120_BAM_filter_on_data_707_peak_2169	156	.	11.0611	18.9878	15.6957	83	Intron (uc001dcr.3/84251, intron 1 of 24)	1	66999825	67210768	210944	1	84251	uc001dcr.3	42651	ENSG00000118473	SGIP1	SH3 domain GRB2 like endophilin interacting protein 1
chr1	67390515	67390690	176	*	CK6___lt__120_BAM_filter_on_data_707_peak_2172	96	.	7.80986	12.6743	9.65191	64	Promoter (<=1kb)	1	67390578	67413923	23346	1	57708	uc001dda.5	0	ENSG00000198160	MIER1	MIER1 transcriptional regulator
chr1	67390993	67391231	239	*	CK6___lt__120_BAM_filter_on_data_707_peak_2173	136	.	9.38006	16.8446	13.6362	75	Promoter (<=1kb)	1	67390578	67454302	63725	1	57708	uc010opg.1	415	ENSG00000198160	MIER1	MIER1 transcriptional regulator
chr1	67390993	67391231	239	*	CK6___lt__120_BAM_filter_on_data_707_peak_2173	136	.	9.38006	16.8446	13.6362	75	Promoter (<=1kb)	1	67390578	67454302	63725	1	57708	uc010opg.1	415	ENSG00000198160	MIER1	MIER1 transcriptional regulator
chr1	67563089	67563399	311	*	CK6___lt__120_BAM_filter_on_data_707_peak_2179a	113	.	8.82813	14.4287	11.3242	132	Intron (uc001ddm.2/400757, intron 5 of 7)	1	67557859	67600654	42796	2	400757	uc001ddm.2	37255	ENSG00000203963	C1orf141	chromosome 1 open reading frame 141
chr1	67563089	67563399	311	*	CK6___lt__120_BAM_filter_on_data_707_peak_2179b	87	.	7.56697	11.7015	8.72838	277	Intron (uc001ddm.2/400757, intron 5 of 7)	1	67557859	67600654	42796	2	400757	uc001ddm.2	37255	ENSG00000203963	C1orf141	chromosome 1 open reading frame 141
chr1	67636459	67636682	224	*	CK6___lt__120_BAM_filter_on_data_707_peak_2181	82	.	6.88355	11.1562	8.212	94	Promoter (1-2kb)	1	67635025	67725650	90626	1	149233	uc010opn.2	1434	ENSG00000162594	IL23R	interleukin 23 receptor
chr1	67637794	67638143	350	*	CK6___lt__120_BAM_filter_on_data_707_peak_2182a	92	.	7.33381	12.2525	9.25096	74	Promoter (2-3kb)	1	67635025	67725650	90626	1	149233	uc010opn.2	2769	ENSG00000162594	IL23R	interleukin 23 receptor
chr1	67722746	67723143	398	*	CK6___lt__120_BAM_filter_on_data_707_peak_2183	350	.	14.9529	38.9431	35.0391	210	Intron (uc009waz.3/149233, intron 10 of 10)	1	67673299	67725650	52352	1	149233	uc001ddt.3	49447	ENSG00000162594	IL23R	interleukin 23 receptor
chr1	67779563	67779874	312	*	CK6___lt__120_BAM_filter_on_data_707_peak_2186b	181	.	10.7041	21.5053	18.1208	260	5' UTR	1	67773047	67862583	89537	1	3595	uc010oqn.3	6516	ENSG00000081985	IL12RB2	interleukin 12 receptor subunit beta 2
chr1	67779563	67779874	312	*	CK6___lt__120_BAM_filter_on_data_707_peak_2186b	181	.	10.7041	21.5053	18.1208	260	5' UTR	1	67773047	67862583	89537	1	3595	uc010oqn.3	6516	ENSG00000081985	IL12RB2	interleukin 12 receptor subunit beta 2
chr1	67896159	67896333	175	*	CK6___lt__120_BAM_filter_on_data_707_peak_2192	102	.	7.95966	13.2755	10.2249	42	Promoter (<=1kb)	1	67873493	67896123	22631	2	26135	uc001ddy.3	-36	ENSG00000142864	SERBP1	SERPINE1 mRNA binding protein 1
chr1	68148591	68148806	216	*	CK6___lt__120_BAM_filter_on_data_707_peak_2198	187	.	7.2455	22.1738	18.7653	150	Promoter (2-3kb)	1	68150860	68154021	3162	1	1647	uc001ddz.2	-2054	ENSG00000116717	GADD45A	growth arrest and DNA damage inducible alpha
chr1	68150647	68151013	367	*	CK6___lt__120_BAM_filter_on_data_707_peak_2200	329	.	10.0435	36.794	32.9455	206	Promoter (<=1kb)	1	68150860	68154021	3162	1	1647	uc001ddz.2	0	ENSG00000116717	GADD45A	growth arrest and DNA damage inducible alpha
chr1	68215761	68216081	321	*	CK6___lt__120_BAM_filter_on_data_707_peak_2202b	135	.	9.8052	16.7694	13.564	207	Intron (uc001dea.2/55970, intron 2 of 3)	1	68150860	68154021	3162	1	1647	uc009wbd.2	64901	ENSG00000116717	GADD45A	growth arrest and DNA damage inducible alpha
chr1	68215761	68216081	321	*	CK6___lt__120_BAM_filter_on_data_707_peak_2202b	135	.	9.8052	16.7694	13.564	207	Intron (uc001dea.2/55970, intron 2 of 3)	1	68150860	68154021	3162	1	1647	uc009wbd.2	64901	ENSG00000116717	GADD45A	growth arrest and DNA damage inducible alpha
chr1	68297604	68297995	392	*	CK6___lt__120_BAM_filter_on_data_707_peak_2206a	174	.	10.2651	20.7747	17.416	215	Promoter (<=1kb)	1	68297971	68668670	370700	1	100289178	uc001deb.2	0	ENSG00000232284	GNG12-AS1	GNG12 antisense RNA 1
chr1	68297604	68297995	392	*	CK6___lt__120_BAM_filter_on_data_707_peak_2206b	319	.	15.1745	35.8098	31.9879	313	Promoter (<=1kb)	1	68297971	68668670	370700	1	100289178	uc001deb.2	0	ENSG00000232284	GNG12-AS1	GNG12 antisense RNA 1
chr1	68353927	68354034	108	*	CK6___lt__120_BAM_filter_on_data_707_peak_2208	91	.	7.79276	12.1088	9.11369	65	Intron (uc001deb.2/100289178, intron 1 of 9)	1	68167149	68299155	132007	2	55970	uc001dea.2	-54772	ENSG00000172380	GNG12	G protein subunit gamma 12
chr1	68609173	68609345	173	*	CK6___lt__120_BAM_filter_on_data_707_peak_2215	121	.	9.14915	15.3157	12.1709	158	Intron (uc001deb.2/100289178, intron 9 of 9)	1	68649201	68649293	93	2	100302279	uc021oos.1	39948	ENSG00000221203	MIR1262	microRNA 1262
chr1	68999765	68999985	221	*	CK6___lt__120_BAM_filter_on_data_707_peak_2223	121	.	9.34875	15.2597	12.1182	146	Intron (uc001den.3/uc001den.3, intron 2 of 2)	1	68939835	68962799	22965	2	55635	uc001dem.4	-36966	ENSG00000024526	DEPDC1	DEP domain containing 1
chr1	70137304	70137675	372	*	CK6___lt__120_BAM_filter_on_data_707_peak_2238	167	.	11.0598	20.1154	16.7814	215	Intron (uc001deo.1/57554, intron 1 of 7)	1	70225858	70589171	363314	1	57554	uc001dep.3	-88183	ENSG00000033122	LRRC7	leucine rich repeat containing 7
chr1	70137304	70137675	372	*	CK6___lt__120_BAM_filter_on_data_707_peak_2238	167	.	11.0598	20.1154	16.7814	215	Intron (uc001deo.1/57554, intron 1 of 7)	1	70225858	70589171	363314	1	57554	uc001dep.3	-88183	ENSG00000033122	LRRC7	leucine rich repeat containing 7
chr1	70622278	70622495	218	*	CK6___lt__120_BAM_filter_on_data_707_peak_2243	116	.	9.02423	14.7834	11.6632	170	Intron (uc001der.2/55631, intron 10 of 14)	1	70610485	70671361	60877	2	55631	uc001der.2	48866	ENSG00000066557	LRRC40	leucine rich repeat containing 40
chr1	70687067	70687193	127	*	CK6___lt__120_BAM_filter_on_data_707_peak_2245	167	.	11.4675	20.13	16.7953	113	Promoter (<=1kb)	1	70687145	70716186	29042	1	9295	uc001deu.2	0	ENSG00000116754	SRSF11	serine and arginine rich splicing factor 11
chr1	71484939	71485256	318	*	CK6___lt__120_BAM_filter_on_data_707_peak_2259a	197	.	12.0034	23.1444	19.702	96	Intron (uc001dfg.1/5733, intron 1 of 4)	1	71512189	71532865	20677	1	100132618	uc001dfr.3	-26933	NA	ZRANB2-AS1	ZRANB2 antisense RNA 1
chr1	71484939	71485256	318	*	CK6___lt__120_BAM_filter_on_data_707_peak_2259a	197	.	12.0034	23.1444	19.702	96	Intron (uc001dfg.1/5733, intron 1 of 4)	1	71512189	71532865	20677	1	100132618	uc001dfr.3	-26933	NA	ZRANB2-AS1	ZRANB2 antisense RNA 1
chr1	71484939	71485256	318	*	CK6___lt__120_BAM_filter_on_data_707_peak_2259b	131	.	9.30453	16.2917	13.1062	214	Intron (uc001dfg.1/5733, intron 1 of 4)	1	71512189	71532865	20677	1	100132618	uc001dfr.3	-26933	NA	ZRANB2-AS1	ZRANB2 antisense RNA 1
chr1	71484939	71485256	318	*	CK6___lt__120_BAM_filter_on_data_707_peak_2259b	131	.	9.30453	16.2917	13.1062	214	Intron (uc001dfg.1/5733, intron 1 of 4)	1	71512189	71532865	20677	1	100132618	uc001dfr.3	-26933	NA	ZRANB2-AS1	ZRANB2 antisense RNA 1
chr1	72347209	72347565	357	*	CK6___lt__120_BAM_filter_on_data_707_peak_2269	143	.	10.0638	17.5814	14.3428	392	Intron (uc001dfv.3/257194, intron 2 of 6)	1	72259915	72302695	42781	2	100852409	uc031pmw.1	-44514	ENSG00000228853	NEGR1-IT1	NEGR1 intronic transcript 1
chr1	72347209	72347565	357	*	CK6___lt__120_BAM_filter_on_data_707_peak_2269	143	.	10.0638	17.5814	14.3428	392	Intron (uc001dfv.3/257194, intron 2 of 6)	1	72259915	72302695	42781	2	100852409	uc031pmw.1	-44514	ENSG00000228853	NEGR1-IT1	NEGR1 intronic transcript 1
chr1	74530799	74531118	320	*	CK6___lt__120_BAM_filter_on_data_707_peak_2294	245	.	14.0361	28.1987	24.5938	174	Intron (uc001dfy.4/127255, intron 6 of 7)	1	74491702	74663871	172170	2	127255	uc001dfy.4	132753	ENSG00000162620	LRRIQ3	leucine rich repeats and IQ motif containing 3
chr1	74822265	74822516	252	*	CK6___lt__120_BAM_filter_on_data_707_peak_2296	138	.	10.1183	17.0609	13.8438	82	Intron (uc001dgc.2/100526835, intron 13 of 18)	1	74701071	75010116	309046	1	51086	uc001dgf.2	121194	ENSG00000116783	TNNI3K	TNNI3 interacting kinase
chr1	75848709	75848782	74	*	CK6___lt__120_BAM_filter_on_data_707_peak_2312	96	.	7.98266	12.6331	9.61316	79	Intron (uc001dgr.2/204962, intron 4 of 25)	1	75667816	76076799	408984	2	204962	uc001dgr.2	228017	ENSG00000137968	SLC44A5	solute carrier family 44 member 5
chr1	76539266	76539594	329	*	CK6___lt__120_BAM_filter_on_data_707_peak_2331a	141	.	8.87214	17.4234	14.1911	125	Promoter (<=1kb)	1	76540389	77042892	502504	1	256435	uc001dhg.4	-795	ENSG00000184005	ST6GALNAC3	ST6 N-acetylgalactosaminide alpha-2,6-sialyltransferase 3
chr1	76540270	76540429	160	*	CK6___lt__120_BAM_filter_on_data_707_peak_2332	154	.	9.33996	18.7071	15.4257	61	Promoter (<=1kb)	1	76540389	77042892	502504	1	256435	uc001dhg.4	0	ENSG00000184005	ST6GALNAC3	ST6 N-acetylgalactosaminide alpha-2,6-sialyltransferase 3
chr1	76572622	76572823	202	*	CK6___lt__120_BAM_filter_on_data_707_peak_2334	107	.	8.46043	13.7803	10.7048	93	Intron (uc001dhg.4/256435, intron 1 of 3)	1	76540389	77096669	556281	1	256435	uc010orh.1	32233	ENSG00000184005	ST6GALNAC3	ST6 N-acetylgalactosaminide alpha-2,6-sialyltransferase 3
chr1	76613638	76613957	320	*	CK6___lt__120_BAM_filter_on_data_707_peak_2337a	82	.	7.27706	11.193	8.24631	72	Intron (uc001dhg.4/256435, intron 1 of 3)	1	76540389	77096669	556281	1	256435	uc010orh.1	73249	ENSG00000184005	ST6GALNAC3	ST6 N-acetylgalactosaminide alpha-2,6-sialyltransferase 3
chr1	76613638	76613957	320	*	CK6___lt__120_BAM_filter_on_data_707_peak_2337b	82	.	7.2518	11.1493	8.20546	182	Intron (uc001dhg.4/256435, intron 1 of 3)	1	76540389	77096669	556281	1	256435	uc010orh.1	73249	ENSG00000184005	ST6GALNAC3	ST6 N-acetylgalactosaminide alpha-2,6-sialyltransferase 3
chr1	76613638	76613957	320	*	CK6___lt__120_BAM_filter_on_data_707_peak_2337c	81	.	7.22672	11.1061	8.1641	288	Intron (uc001dhg.4/256435, intron 1 of 3)	1	76540389	77096669	556281	1	256435	uc010orh.1	73249	ENSG00000184005	ST6GALNAC3	ST6 N-acetylgalactosaminide alpha-2,6-sialyltransferase 3
chr1	76704927	76705547	621	*	CK6___lt__120_BAM_filter_on_data_707_peak_2338	505	.	16.5787	54.8	50.5262	342	Intron (uc001dhg.4/256435, intron 1 of 3)	1	76540389	77096669	556281	1	256435	uc010orh.1	164538	ENSG00000184005	ST6GALNAC3	ST6 N-acetylgalactosaminide alpha-2,6-sialyltransferase 3
chr1	76704927	76705547	621	*	CK6___lt__120_BAM_filter_on_data_707_peak_2338	505	.	16.5787	54.8	50.5262	342	Intron (uc001dhg.4/256435, intron 1 of 3)	1	76540389	77096669	556281	1	256435	uc010orh.1	164538	ENSG00000184005	ST6GALNAC3	ST6 N-acetylgalactosaminide alpha-2,6-sialyltransferase 3
chr1	76717867	76718113	247	*	CK6___lt__120_BAM_filter_on_data_707_peak_2340	84	.	7.50738	11.4418	8.48228	203	Intron (uc001dhg.4/256435, intron 1 of 3)	1	76540389	77096669	556281	1	256435	uc010orh.1	177478	ENSG00000184005	ST6GALNAC3	ST6 N-acetylgalactosaminide alpha-2,6-sialyltransferase 3
chr1	76733393	76733577	185	*	CK6___lt__120_BAM_filter_on_data_707_peak_2341	111	.	8.83771	14.2351	11.1392	68	Intron (uc001dhg.4/256435, intron 1 of 3)	1	76540389	77096669	556281	1	256435	uc010orh.1	193004	ENSG00000184005	ST6GALNAC3	ST6 N-acetylgalactosaminide alpha-2,6-sialyltransferase 3
chr1	76759594	76759799	206	*	CK6___lt__120_BAM_filter_on_data_707_peak_2343	163	.	11.0308	19.6558	16.3383	75	Intron (uc001dhg.4/256435, intron 1 of 3)	1	76540389	77096669	556281	1	256435	uc010orh.1	219205	ENSG00000184005	ST6GALNAC3	ST6 N-acetylgalactosaminide alpha-2,6-sialyltransferase 3
chr1	76899377	76899564	188	*	CK6___lt__120_BAM_filter_on_data_707_peak_2346	135	.	10.0103	16.7373	13.5335	114	Intron (uc001dhg.4/256435, intron 3 of 3)	1	76540389	77096669	556281	1	256435	uc010orh.1	358988	ENSG00000184005	ST6GALNAC3	ST6 N-acetylgalactosaminide alpha-2,6-sialyltransferase 3
chr1	77436951	77437201	251	*	CK6___lt__120_BAM_filter_on_data_707_peak_2355	1751	.	48.8675	181.081	175.198	123	Intron (uc001dhi.3/81849, intron 2 of 4)	1	77334182	77529737	195556	1	81849	uc009wbw.3	102769	ENSG00000117069	ST6GALNAC5	ST6 N-acetylgalactosaminide alpha-2,6-sialyltransferase 5
chr1	77836613	77836896	284	*	CK6___lt__120_BAM_filter_on_data_707_peak_2360	162	.	10.7367	19.563	16.2488	176	Intron (uc001dhn.3/26289, intron 6 of 13)	1	77748287	78025654	277368	1	26289	uc001dho.3	88326	ENSG00000154027	AK5	adenylate kinase 5
chr1	77980037	77980285	249	*	CK6___lt__120_BAM_filter_on_data_707_peak_2362	207	.	12.3174	24.1956	20.7177	180	Intron (uc001dhn.3/26289, intron 10 of 13)	1	78030190	78099090	68901	2	26009	uc001dhp.3	118805	ENSG00000036549	ZZZ3	zinc finger ZZ-type containing 3
chr1	78002560	78002747	188	*	CK6___lt__120_BAM_filter_on_data_707_peak_2364	85	.	7.45891	11.5102	8.54633	123	Intron (uc001dhn.3/26289, intron 13 of 13)	1	78030190	78099090	68901	2	26009	uc001dhp.3	96343	ENSG00000036549	ZZZ3	zinc finger ZZ-type containing 3
chr1	78070844	78071403	560	*	CK6___lt__120_BAM_filter_on_data_707_peak_2368b	364	.	11.5153	40.3574	36.4167	375	Intron (uc001dhp.3/26009, intron 1 of 10)	1	78030190	78099090	68901	2	26009	uc001dhp.3	27687	ENSG00000036549	ZZZ3	zinc finger ZZ-type containing 3
chr1	78070844	78071403	560	*	CK6___lt__120_BAM_filter_on_data_707_peak_2368b	364	.	11.5153	40.3574	36.4167	375	Intron (uc001dhp.3/26009, intron 1 of 10)	1	78030190	78099090	68901	2	26009	uc001dhp.3	27687	ENSG00000036549	ZZZ3	zinc finger ZZ-type containing 3
chr1	78109235	78109419	185	*	CK6___lt__120_BAM_filter_on_data_707_peak_2369	209	.	12.4709	24.4542	20.9679	146	Intron (uc001dhq.3/26009, intron 1 of 14)	1	78030190	78099090	68901	2	26009	uc001dhp.3	-10145	ENSG00000036549	ZZZ3	zinc finger ZZ-type containing 3
chr1	78148324	78148804	481	*	CK6___lt__120_BAM_filter_on_data_707_peak_2373b	269	.	12.5694	30.6615	26.9845	298	Promoter (<=1kb)	1	78030190	78148343	118154	2	26009	uc001dhq.3	0	ENSG00000036549	ZZZ3	zinc finger ZZ-type containing 3
chr1	78148324	78148804	481	*	CK6___lt__120_BAM_filter_on_data_707_peak_2373b	269	.	12.5694	30.6615	26.9845	298	Promoter (<=1kb)	1	78030190	78148343	118154	2	26009	uc001dhq.3	0	ENSG00000036549	ZZZ3	zinc finger ZZ-type containing 3
chr1	78262460	78262685	226	*	CK6___lt__120_BAM_filter_on_data_707_peak_2376	116	.	8.99095	14.7227	11.6049	99	Intron (uc001dhx.4/374986, intron 2 of 15)	1	78268955	78327860	58906	1	374986	uc001dhy.1	-6270	ENSG00000180488	MIGA1	mitoguardin 1
chr1	78444887	78444988	102	*	CK6___lt__120_BAM_filter_on_data_707_peak_2379	129	.	8.40885	16.1676	12.9867	128	Promoter (<=1kb)	1	78444934	78482995	38062	1	11080	uc010orn.2	0	ENSG00000162616	DNAJB4	DnaJ heat shock protein family (Hsp40) member B4
chr1	78580209	78580343	135	*	CK6___lt__120_BAM_filter_on_data_707_peak_2385	139	.	10.1906	17.1799	13.9572	72	Intron (uc001dik.3/54810, intron 3 of 5)	1	78511589	78603112	91524	1	54810	uc001dik.3	68620	ENSG00000137960	GIPC2	GIPC PDZ domain containing family member 2
chr1	78744761	78745114	354	*	CK6___lt__120_BAM_filter_on_data_707_peak_2386	290	.	13.3897	32.7505	29.0127	178	Intron (uc001dil.1/149047, intron 3 of 5)	1	78695283	78835147	139865	1	149047	uc009wcc.3	49478	ENSG00000237413	MGC27382	uncharacterized MGC27382
chr1	78744761	78745114	354	*	CK6___lt__120_BAM_filter_on_data_707_peak_2386	290	.	13.3897	32.7505	29.0127	178	Intron (uc001dil.1/149047, intron 3 of 5)	1	78695283	78835147	139865	1	149047	uc009wcc.3	49478	ENSG00000237413	MGC27382	uncharacterized MGC27382
chr1	81793470	81793909	440	*	CK6___lt__120_BAM_filter_on_data_707_peak_2410a	227	.	10.1493	26.2555	22.7113	250	Intron (uc001dis.3/23266, intron 1 of 8)	1	81771845	82458107	686263	1	23266	uc001dis.3	21625	ENSG00000117114	ADGRL2	adhesion G protein-coupled receptor L2
chr1	81793470	81793909	440	*	CK6___lt__120_BAM_filter_on_data_707_peak_2410b	436	.	15.3777	47.8181	43.6976	441	Intron (uc001dis.3/23266, intron 1 of 8)	1	81771845	82458107	686263	1	23266	uc001dis.3	21625	ENSG00000117114	ADGRL2	adhesion G protein-coupled receptor L2
chr1	81837459	81837885	427	*	CK6___lt__120_BAM_filter_on_data_707_peak_2411a	292	.	13.1302	32.9619	29.2183	344	Intron (uc001dis.3/23266, intron 1 of 8)	1	81771845	82458107	686263	1	23266	uc001dis.3	65614	ENSG00000117114	ADGRL2	adhesion G protein-coupled receptor L2
chr1	81837459	81837885	427	*	CK6___lt__120_BAM_filter_on_data_707_peak_2411a	292	.	13.1302	32.9619	29.2183	344	Intron (uc001dis.3/23266, intron 1 of 8)	1	81771845	82458107	686263	1	23266	uc001dis.3	65614	ENSG00000117114	ADGRL2	adhesion G protein-coupled receptor L2
chr1	81837459	81837885	427	*	CK6___lt__120_BAM_filter_on_data_707_peak_2411b	104	.	7.09721	13.5089	10.4475	514	Intron (uc001dis.3/23266, intron 1 of 8)	1	81771845	82458107	686263	1	23266	uc001dis.3	65614	ENSG00000117114	ADGRL2	adhesion G protein-coupled receptor L2
chr1	81837459	81837885	427	*	CK6___lt__120_BAM_filter_on_data_707_peak_2411b	104	.	7.09721	13.5089	10.4475	514	Intron (uc001dis.3/23266, intron 1 of 8)	1	81771845	82458107	686263	1	23266	uc001dis.3	65614	ENSG00000117114	ADGRL2	adhesion G protein-coupled receptor L2
chr1	82300658	82300900	243	*	CK6___lt__120_BAM_filter_on_data_707_peak_2417	174	.	10.2915	20.8187	17.4588	91	Intron (uc001dis.3/23266, intron 5 of 8)	1	82266082	82458107	192026	1	23266	uc009wcd.3	34576	ENSG00000117114	ADGRL2	adhesion G protein-coupled receptor L2
chr1	84262263	84262422	160	*	CK6___lt__120_BAM_filter_on_data_707_peak_2437	87	.	7.65746	11.7348	8.76051	80	Intron (uc001diz.4/uc001diz.4, intron 1 of 2)	1	84259598	84379059	119462	2	100847084	uc031pmy.1	116637	ENSG00000264406	MIR548AP	microRNA 548ap
chr1	84363286	84363435	150	*	CK6___lt__120_BAM_filter_on_data_707_peak_2439	120	.	9.3103	15.1796	12.0416	108	Intron (uc031pmy.1/100847084, intron 1 of 1)	1	84259598	84379059	119462	2	100847084	uc031pmy.1	15624	ENSG00000264406	MIR548AP	microRNA 548ap
chr1	84427592	84427829	238	*	CK6___lt__120_BAM_filter_on_data_707_peak_2440	85	.	7.50118	11.465	8.50393	67	Intron (uc001djc.3/79739, intron 1 of 20)	1	84335057	84418070	83014	2	79739	uc001djb.3	-9522	ENSG00000137941	TTLL7	tubulin tyrosine ligase like 7
chr1	84555237	84555427	191	*	CK6___lt__120_BAM_filter_on_data_707_peak_2442	124	.	9.44379	15.5674	12.4125	149	Intron (uc001dji.3/5567, intron 1 of 8)	1	84543745	84704181	160437	1	5567	uc001djj.3	11492	ENSG00000142875	PRKACB	protein kinase cAMP-activated catalytic subunit beta
chr1	84587959	84588171	213	*	CK6___lt__120_BAM_filter_on_data_707_peak_2443	127	.	9.52773	15.9624	12.7904	86	Intron (uc001dji.3/5567, intron 1 of 8)	1	84609952	84704181	94230	1	5567	uc001djl.3	-21781	ENSG00000142875	PRKACB	protein kinase cAMP-activated catalytic subunit beta
chr1	85313078	85313223	146	*	CK6___lt__120_BAM_filter_on_data_707_peak_2463	86	.	7.38762	11.5943	8.62732	78	Intron (uc001dkl.2/23566, intron 1 of 1)	1	85279086	85331842	52757	2	23566	uc001dkl.2	18619	ENSG00000171517	LPAR3	lysophosphatidic acid receptor 3
chr1	85320077	85320314	238	*	CK6___lt__120_BAM_filter_on_data_707_peak_2465	128	.	9.37617	16.0237	12.8488	97	Intron (uc001dkl.2/23566, intron 1 of 1)	1	85279086	85331842	52757	2	23566	uc001dkl.2	11528	ENSG00000171517	LPAR3	lysophosphatidic acid receptor 3
chr1	85438237	85438467	231	*	CK6___lt__120_BAM_filter_on_data_707_peak_2469	108	.	8.70181	13.9754	10.8915	121	Intron (uc001dkm.3/255231, intron 1 of 13)	1	85391266	85462796	71531	2	255231	uc001dkm.3	24329	ENSG00000153898	MCOLN2	mucolipin 2
chr1	85667347	85667531	185	*	CK6___lt__120_BAM_filter_on_data_707_peak_2476	213	.	13.6195	24.806	21.3082	51	Promoter (<=1kb)	1	85646846	85666728	19883	2	84144	uc001dku.4	-619	ENSG00000097096	SYDE2	synapse defective Rho GTPase homolog 2
chr1	85742252	85742628	377	*	CK6___lt__120_BAM_filter_on_data_707_peak_2477a	176	.	11.3018	20.9785	17.6127	187	Promoter (<=1kb)	1	85731460	85742587	11128	2	8915	uc021opd.1	0	ENSG00000142867	BCL10	B-cell CLL/lymphoma 10
chr1	85742252	85742628	377	*	CK6___lt__120_BAM_filter_on_data_707_peak_2477b	96	.	7.80986	12.6743	9.65191	332	Promoter (<=1kb)	1	85731460	85742587	11128	2	8915	uc021opd.1	0	ENSG00000142867	BCL10	B-cell CLL/lymphoma 10
chr1	85809522	85809752	231	*	CK6___lt__120_BAM_filter_on_data_707_peak_2482	106	.	8.57001	13.728	10.6554	208	Intron (uc001dla.2/646626, intron 2 of 4)	1	85784168	85870180	86013	2	23576	uc010osb.2	60428	ENSG00000153904	DDAH1	dimethylarginine dimethylaminohydrolase 1
chr1	85986579	85986983	405	*	CK6___lt__120_BAM_filter_on_data_707_peak_2486b	96	.	7.32881	12.6345	9.61437	194	Intron (uc001dlc.3/23576, intron 1 of 6)	1	85784168	85930889	146722	2	23576	uc001dlb.3	-55690	ENSG00000153904	DDAH1	dimethylarginine dimethylaminohydrolase 1
chr1	85986579	85986983	405	*	CK6___lt__120_BAM_filter_on_data_707_peak_2486b	96	.	7.32881	12.6345	9.61437	194	Intron (uc001dlc.3/23576, intron 1 of 6)	1	85784168	85930889	146722	2	23576	uc001dlb.3	-55690	ENSG00000153904	DDAH1	dimethylarginine dimethylaminohydrolase 1
chr1	85986579	85986983	405	*	CK6___lt__120_BAM_filter_on_data_707_peak_2486c	118	.	8.22327	14.942	11.8146	371	Intron (uc001dlc.3/23576, intron 1 of 6)	1	85784168	85930889	146722	2	23576	uc001dlb.3	-55690	ENSG00000153904	DDAH1	dimethylarginine dimethylaminohydrolase 1
chr1	85986579	85986983	405	*	CK6___lt__120_BAM_filter_on_data_707_peak_2486c	118	.	8.22327	14.942	11.8146	371	Intron (uc001dlc.3/23576, intron 1 of 6)	1	85784168	85930889	146722	2	23576	uc001dlb.3	-55690	ENSG00000153904	DDAH1	dimethylarginine dimethylaminohydrolase 1
chr1	86146891	86147033	143	*	CK6___lt__120_BAM_filter_on_data_707_peak_2493	111	.	8.88655	14.2866	11.1884	91	Intron (uc001dlh.3/54680, intron 5 of 9)	1	86115106	86174116	59011	2	54680	uc001dlh.3	27083	ENSG00000117174	ZNHIT6	zinc finger HIT-type containing 6
chr1	86174088	86174346	259	*	CK6___lt__120_BAM_filter_on_data_707_peak_2494	162	.	10.9537	19.5196	16.2068	114	Promoter (<=1kb)	1	86115106	86174116	59011	2	54680	uc001dlh.3	0	ENSG00000117174	ZNHIT6	zinc finger HIT-type containing 6
chr1	86379196	86379360	165	*	CK6___lt__120_BAM_filter_on_data_707_peak_2497	86	.	7.38762	11.5943	8.62732	95	Intron (uc001dli.3/255631, intron 1 of 34)	1	86194916	86428932	234017	2	255631	uc001dli.3	49572	ENSG00000171502	COL24A1	collagen type XXIV alpha 1 chain
chr1	87380022	87380238	217	*	CK6___lt__120_BAM_filter_on_data_707_peak_2516	284	.	15.6641	32.1321	28.4123	287	Promoter (<=1kb)	1	87328128	87380107	51980	2	9403	uc021oph.1	0	ENSG00000183291	SELENOF	selenoprotein F
chr1	87620145	87620411	267	*	CK6___lt__120_BAM_filter_on_data_707_peak_2520b	85	.	5.34891	11.4901	8.52838	200	Intron (uc001dme.2/339524, intron 7 of 7)	1	87597609	87602352	4744	1	339524	uc010oso.2	22536	ENSG00000267272	LINC01140	long intergenic non-protein coding RNA 1140
chr1	87620145	87620411	267	*	CK6___lt__120_BAM_filter_on_data_707_peak_2520b	85	.	5.34891	11.4901	8.52838	200	Intron (uc001dme.2/339524, intron 7 of 7)	1	87597609	87602352	4744	1	339524	uc010oso.2	22536	ENSG00000267272	LINC01140	long intergenic non-protein coding RNA 1140
chr1	87620807	87621207	401	*	CK6___lt__120_BAM_filter_on_data_707_peak_2521a	293	.	10.543	33.0879	29.3407	148	Intron (uc001dme.2/339524, intron 7 of 7)	1	87597609	87602352	4744	1	339524	uc010oso.2	23198	ENSG00000267272	LINC01140	long intergenic non-protein coding RNA 1140
chr1	87620807	87621207	401	*	CK6___lt__120_BAM_filter_on_data_707_peak_2521a	293	.	10.543	33.0879	29.3407	148	Intron (uc001dme.2/339524, intron 7 of 7)	1	87597609	87602352	4744	1	339524	uc010oso.2	23198	ENSG00000267272	LINC01140	long intergenic non-protein coding RNA 1140
chr1	87620807	87621207	401	*	CK6___lt__120_BAM_filter_on_data_707_peak_2521b	304	.	10.7882	34.2438	30.4644	267	Intron (uc001dme.2/339524, intron 7 of 7)	1	87597609	87602352	4744	1	339524	uc010oso.2	23198	ENSG00000267272	LINC01140	long intergenic non-protein coding RNA 1140
chr1	87620807	87621207	401	*	CK6___lt__120_BAM_filter_on_data_707_peak_2521b	304	.	10.7882	34.2438	30.4644	267	Intron (uc001dme.2/339524, intron 7 of 7)	1	87597609	87602352	4744	1	339524	uc010oso.2	23198	ENSG00000267272	LINC01140	long intergenic non-protein coding RNA 1140
chr1	87621455	87621680	226	*	CK6___lt__120_BAM_filter_on_data_707_peak_2522	177	.	7.84597	21.0878	17.7181	123	Intron (uc001dme.2/339524, intron 7 of 7)	1	87597609	87602352	4744	1	339524	uc010oso.2	23846	ENSG00000267272	LINC01140	long intergenic non-protein coding RNA 1140
chr1	87634558	87635340	783	*	CK6___lt__120_BAM_filter_on_data_707_peak_2523a	93	.	5.57647	12.3294	9.32359	110	3' UTR	1	87597609	87602352	4744	1	339524	uc010oso.2	36949	ENSG00000267272	LINC01140	long intergenic non-protein coding RNA 1140
chr1	87634558	87635340	783	*	CK6___lt__120_BAM_filter_on_data_707_peak_2523a	93	.	5.57647	12.3294	9.32359	110	3' UTR	1	87597609	87602352	4744	1	339524	uc010oso.2	36949	ENSG00000267272	LINC01140	long intergenic non-protein coding RNA 1140
chr1	87634558	87635340	783	*	CK6___lt__120_BAM_filter_on_data_707_peak_2523a	93	.	5.57647	12.3294	9.32359	110	3' UTR	1	87597609	87602352	4744	1	339524	uc010oso.2	36949	ENSG00000267272	LINC01140	long intergenic non-protein coding RNA 1140
chr1	87634558	87635340	783	*	CK6___lt__120_BAM_filter_on_data_707_peak_2523b	302	.	10.6829	34.0129	30.2405	393	3' UTR	1	87597609	87602352	4744	1	339524	uc010oso.2	36949	ENSG00000267272	LINC01140	long intergenic non-protein coding RNA 1140
chr1	87634558	87635340	783	*	CK6___lt__120_BAM_filter_on_data_707_peak_2523b	302	.	10.6829	34.0129	30.2405	393	3' UTR	1	87597609	87602352	4744	1	339524	uc010oso.2	36949	ENSG00000267272	LINC01140	long intergenic non-protein coding RNA 1140
chr1	87634558	87635340	783	*	CK6___lt__120_BAM_filter_on_data_707_peak_2523b	302	.	10.6829	34.0129	30.2405	393	3' UTR	1	87597609	87602352	4744	1	339524	uc010oso.2	36949	ENSG00000267272	LINC01140	long intergenic non-protein coding RNA 1140
chr1	87634558	87635340	783	*	CK6___lt__120_BAM_filter_on_data_707_peak_2523c	719	.	18.7736	76.6402	71.9745	600	3' UTR	1	87597609	87602352	4744	1	339524	uc010oso.2	36949	ENSG00000267272	LINC01140	long intergenic non-protein coding RNA 1140
chr1	87634558	87635340	783	*	CK6___lt__120_BAM_filter_on_data_707_peak_2523c	719	.	18.7736	76.6402	71.9745	600	3' UTR	1	87597609	87602352	4744	1	339524	uc010oso.2	36949	ENSG00000267272	LINC01140	long intergenic non-protein coding RNA 1140
chr1	87634558	87635340	783	*	CK6___lt__120_BAM_filter_on_data_707_peak_2523c	719	.	18.7736	76.6402	71.9745	600	3' UTR	1	87597609	87602352	4744	1	339524	uc010oso.2	36949	ENSG00000267272	LINC01140	long intergenic non-protein coding RNA 1140
chr1	87794031	87794161	131	*	CK6___lt__120_BAM_filter_on_data_707_peak_2526	161	.	11.2279	19.4397	16.1302	122	Promoter (<=1kb)	1	87794151	87814607	20457	1	8543	uc001dmi.3	0	ENSG00000143013	LMO4	LIM domain only 4
chr1	89149697	89150019	323	*	CK6___lt__120_BAM_filter_on_data_707_peak_2551	439	.	19.3923	48.0705	43.9442	97	Promoter (<=1kb)	1	89149922	89301938	152017	1	5586	uc001dmn.3	0	ENSG00000065243	PKN2	protein kinase N2
chr1	89357380	89357516	137	*	CK6___lt__120_BAM_filter_on_data_707_peak_2555	157	.	10.8775	19.0249	15.7304	72	Promoter (<=1kb)	1	89325823	89357301	31479	2	2959	uc009wcw.1	-79	ENSG00000137947	GTF2B	general transcription factor IIB
chr1	89458298	89458854	557	*	CK6___lt__120_BAM_filter_on_data_707_peak_2559a	161	.	9.76871	19.4223	16.1134	183	Promoter (<=1kb)	1	89445139	89458643	13505	2	494115	uc001dms.3	0	ENSG00000213516	RBMXL1	RNA binding motif protein, X-linked like 1
chr1	89458298	89458854	557	*	CK6___lt__120_BAM_filter_on_data_707_peak_2559a	161	.	9.76871	19.4223	16.1134	183	Promoter (<=1kb)	1	89445139	89458643	13505	2	494115	uc001dms.3	0	ENSG00000213516	RBMXL1	RNA binding motif protein, X-linked like 1
chr1	89458298	89458854	557	*	CK6___lt__120_BAM_filter_on_data_707_peak_2559a	161	.	9.76871	19.4223	16.1134	183	Promoter (<=1kb)	1	89445139	89458643	13505	2	494115	uc001dms.3	0	ENSG00000213516	RBMXL1	RNA binding motif protein, X-linked like 1
chr1	89458298	89458854	557	*	CK6___lt__120_BAM_filter_on_data_707_peak_2559b	103	.	7.56785	13.4355	10.378	423	Promoter (<=1kb)	1	89445139	89458643	13505	2	494115	uc001dms.3	0	ENSG00000213516	RBMXL1	RNA binding motif protein, X-linked like 1
chr1	89458298	89458854	557	*	CK6___lt__120_BAM_filter_on_data_707_peak_2559b	103	.	7.56785	13.4355	10.378	423	Promoter (<=1kb)	1	89445139	89458643	13505	2	494115	uc001dms.3	0	ENSG00000213516	RBMXL1	RNA binding motif protein, X-linked like 1
chr1	89458298	89458854	557	*	CK6___lt__120_BAM_filter_on_data_707_peak_2559b	103	.	7.56785	13.4355	10.378	423	Promoter (<=1kb)	1	89445139	89458643	13505	2	494115	uc001dms.3	0	ENSG00000213516	RBMXL1	RNA binding motif protein, X-linked like 1
chr1	89578727	89578876	150	*	CK6___lt__120_BAM_filter_on_data_707_peak_2563	88	.	7.71919	11.8576	8.87656	96	Intron (uc001dmy.1/2634, intron 10 of 14)	1	89573310	89591799	18490	2	2634	uc001dmz.1	12923	ENSG00000162645	GBP2	guanylate binding protein 2
chr1	89634991	89635178	188	*	CK6___lt__120_BAM_filter_on_data_707_peak_2565	154	.	10.8772	18.7451	15.462	173	Intron (uc001dna.2/388646, intron 2 of 10)	1	89597434	89641723	44290	2	388646	uc001dna.2	6545	ENSG00000213512	GBP7	guanylate binding protein 7
chr1	90123475	90123728	254	*	CK6___lt__120_BAM_filter_on_data_707_peak_2575	126	.	9.45871	15.8381	12.6715	221	Intron (uc001dnl.4/84230, intron 1 of 2)	1	90098644	90185094	86451	1	84230	uc001dnl.4	24831	ENSG00000171488	LRRC8C	leucine rich repeat containing 8 VRAC subunit C
chr1	90123475	90123728	254	*	CK6___lt__120_BAM_filter_on_data_707_peak_2575	126	.	9.45871	15.8381	12.6715	221	Intron (uc001dnl.4/84230, intron 1 of 2)	1	90098644	90185094	86451	1	84230	uc001dnl.4	24831	ENSG00000171488	LRRC8C	leucine rich repeat containing 8 VRAC subunit C
chr1	90286426	90286601	176	*	CK6___lt__120_BAM_filter_on_data_707_peak_2579	220	.	13.6373	25.5536	22.031	108	Promoter (<=1kb)	1	90286573	90401989	115417	1	55144	uc001dnm.3	0	ENSG00000171492	LRRC8D	leucine rich repeat containing 8 VRAC subunit D
chr1	90460497	90460690	194	*	CK6___lt__120_BAM_filter_on_data_707_peak_2591	127	.	9.34472	15.9698	12.7971	71	Promoter (<=1kb)	1	90460678	90472000	11323	1	284695	uc001dnp.4	0	ENSG00000162664	ZNF326	zinc finger protein 326
chr1	91406445	91406580	136	*	CK6___lt__120_BAM_filter_on_data_707_peak_2604	139	.	10.237	17.1743	13.9524	54	Exon (uc001dnw.3/84146, exon 3 of 6)	1	91380857	91487065	106209	2	84146	uc001dnv.3	80485	ENSG00000122482	ZNF644	zinc finger protein 644
chr1	91811394	91811451	58	*	CK6___lt__120_BAM_filter_on_data_707_peak_2620	90	.	7.73443	12.0078	9.01704	104	Promoter (1-2kb)	1	91727744	91813033	85290	2	164045	uc001dob.4	1582	ENSG00000162669	HFM1	HFM1, ATP dependent DNA helicase homolog
chr1	91852783	91853232	450	*	CK6___lt__120_BAM_filter_on_data_707_peak_2621	3890	.	34.3349	395.729	389.044	126	Intron (uc001doa.4/164045, intron 4 of 38)	1	91843000	91866666	23667	2	164045	uc001doc.1	13434	ENSG00000162669	HFM1	HFM1, ATP dependent DNA helicase homolog
chr1	92292950	92293619	670	*	CK6___lt__120_BAM_filter_on_data_707_peak_2631b	157	.	10.1786	19.0951	15.7985	559	Intron (uc009wde.3/7049, intron 1 of 19)	1	92145900	92327603	181704	2	7049	uc009wde.3	33984	ENSG00000069702	TGFBR3	transforming growth factor beta receptor 3
chr1	92292950	92293619	670	*	CK6___lt__120_BAM_filter_on_data_707_peak_2631b	157	.	10.1786	19.0951	15.7985	559	Intron (uc009wde.3/7049, intron 1 of 19)	1	92145900	92327603	181704	2	7049	uc009wde.3	33984	ENSG00000069702	TGFBR3	transforming growth factor beta receptor 3
chr1	92292950	92293619	670	*	CK6___lt__120_BAM_filter_on_data_707_peak_2631b	157	.	10.1786	19.0951	15.7985	559	Intron (uc009wde.3/7049, intron 1 of 19)	1	92145900	92327603	181704	2	7049	uc009wde.3	33984	ENSG00000069702	TGFBR3	transforming growth factor beta receptor 3
chr1	92329968	92330356	389	*	CK6___lt__120_BAM_filter_on_data_707_peak_2633	137	.	8.85806	16.9132	13.7019	119	Promoter (2-3kb)	1	92145900	92327603	181704	2	7049	uc009wde.3	-2365	ENSG00000069702	TGFBR3	transforming growth factor beta receptor 3
chr1	92329968	92330356	389	*	CK6___lt__120_BAM_filter_on_data_707_peak_2633	137	.	8.85806	16.9132	13.7019	119	Promoter (2-3kb)	1	92145900	92327603	181704	2	7049	uc009wde.3	-2365	ENSG00000069702	TGFBR3	transforming growth factor beta receptor 3
chr1	92496333	92496621	289	*	CK6___lt__120_BAM_filter_on_data_707_peak_2637	234	.	13.3475	27.0294	23.4599	290	Promoter (<=1kb)	1	92495533	92529093	33561	1	253152	uc001don.2	800	ENSG00000172031	EPHX4	epoxide hydrolase 4
chr1	93189336	93189829	494	*	CK6___lt__120_BAM_filter_on_data_707_peak_2645a	136	.	9.13557	16.8966	13.6866	120	Intron (uc001dox.3/7813, intron 2 of 17)	1	93029199	93159945	130747	2	7813	uc001doy.1	-29391	ENSG00000067208	EVI5	ecotropic viral integration site 5
chr1	93189336	93189829	494	*	CK6___lt__120_BAM_filter_on_data_707_peak_2645a	136	.	9.13557	16.8966	13.6866	120	Intron (uc001dox.3/7813, intron 2 of 17)	1	93029199	93159945	130747	2	7813	uc001doy.1	-29391	ENSG00000067208	EVI5	ecotropic viral integration site 5
chr1	93189336	93189829	494	*	CK6___lt__120_BAM_filter_on_data_707_peak_2645b	353	.	16.8287	39.3032	35.3886	245	Intron (uc001dox.3/7813, intron 2 of 17)	1	93029199	93159945	130747	2	7813	uc001doy.1	-29391	ENSG00000067208	EVI5	ecotropic viral integration site 5
chr1	93189336	93189829	494	*	CK6___lt__120_BAM_filter_on_data_707_peak_2645b	353	.	16.8287	39.3032	35.3886	245	Intron (uc001dox.3/7813, intron 2 of 17)	1	93029199	93159945	130747	2	7813	uc001doy.1	-29391	ENSG00000067208	EVI5	ecotropic viral integration site 5
chr1	93209713	93209936	224	*	CK6___lt__120_BAM_filter_on_data_707_peak_2647	122	.	9.22484	15.422	12.2735	95	Intron (uc001dox.3/7813, intron 1 of 17)	1	92974253	93257961	283709	2	7813	uc001dox.3	48025	ENSG00000067208	EVI5	ecotropic viral integration site 5
chr1	93219651	93219831	181	*	CK6___lt__120_BAM_filter_on_data_707_peak_2648	101	.	8.35359	13.1752	10.1288	122	Intron (uc001dox.3/7813, intron 1 of 17)	1	92974253	93257961	283709	2	7813	uc001dox.3	38130	ENSG00000067208	EVI5	ecotropic viral integration site 5
chr1	93250692	93250949	258	*	CK6___lt__120_BAM_filter_on_data_707_peak_2649a	157	.	10.8775	19.0249	15.7304	133	Intron (uc001dox.3/7813, intron 1 of 17)	1	92974253	93257961	283709	2	7813	uc001dox.3	7012	ENSG00000067208	EVI5	ecotropic viral integration site 5
chr1	93347107	93347422	316	*	CK6___lt__120_BAM_filter_on_data_707_peak_2652a	189	.	11.2452	22.4044	18.988	359	Intron (uc001dpc.3/388650, intron 1 of 4)	1	93307717	93342707	34991	2	388650	uc021opu.1	-4400	ENSG00000154511	FAM69A	family with sequence similarity 69 member A
chr1	93347107	93347422	316	*	CK6___lt__120_BAM_filter_on_data_707_peak_2652a	189	.	11.2452	22.4044	18.988	359	Intron (uc001dpc.3/388650, intron 1 of 4)	1	93307717	93342707	34991	2	388650	uc021opu.1	-4400	ENSG00000154511	FAM69A	family with sequence similarity 69 member A
chr1	93347107	93347422	316	*	CK6___lt__120_BAM_filter_on_data_707_peak_2652b	92	.	7.33381	12.2525	9.25096	531	Intron (uc001dpc.3/388650, intron 1 of 4)	1	93307717	93342707	34991	2	388650	uc021opu.1	-4400	ENSG00000154511	FAM69A	family with sequence similarity 69 member A
chr1	93347107	93347422	316	*	CK6___lt__120_BAM_filter_on_data_707_peak_2652b	92	.	7.33381	12.2525	9.25096	531	Intron (uc001dpc.3/388650, intron 1 of 4)	1	93307717	93342707	34991	2	388650	uc021opu.1	-4400	ENSG00000154511	FAM69A	family with sequence similarity 69 member A
chr1	93742631	93742759	129	*	CK6___lt__120_BAM_filter_on_data_707_peak_2659	120	.	9.3103	15.1796	12.0416	81	Intron (uc021opx.1/343099, intron 27 of 27)	1	93720028	93730500	10473	1	343099	uc001dpr.1	22603	ENSG00000122483	CCDC18	coiled-coil domain containing 18
chr1	94018652	94018988	337	*	CK6___lt__120_BAM_filter_on_data_707_peak_2664	236	.	12.7705	27.2348	23.6595	500	3' UTR	1	94009664	94020218	10555	1	54874	uc010otl.2	8988	ENSG00000137942	FNBP1L	formin binding protein 1 like
chr1	94032996	94033388	393	*	CK6___lt__120_BAM_filter_on_data_707_peak_2665b	612	.	21.9509	65.7053	61.2261	267	Exon (uc001dpx.5/8412, exon 6 of 8)	1	94027343	94050719	23377	2	8412	uc001dpx.5	17331	ENSG00000137936	BCAR3	BCAR3, NSP family adaptor protein
chr1	94039770	94039928	159	*	CK6___lt__120_BAM_filter_on_data_707_peak_2666	131	.	9.82442	16.3148	13.1278	83	Intron (uc001dpx.5/8412, intron 4 of 7)	1	94027343	94050719	23377	2	8412	uc001dpx.5	10791	ENSG00000137936	BCAR3	BCAR3, NSP family adaptor protein
chr1	94091150	94091383	234	*	CK6___lt__120_BAM_filter_on_data_707_peak_2669	173	.	11.4029	20.7107	17.3542	116	Intron (uc001dpz.4/8412, intron 3 of 11)	1	94027343	94079702	52360	2	8412	uc001dpy.4	-11448	ENSG00000137936	BCAR3	BCAR3, NSP family adaptor protein
chr1	94130252	94130527	276	*	CK6___lt__120_BAM_filter_on_data_707_peak_2672	224	.	10.2964	25.944	22.4095	245	Intron (uc001dpz.4/8412, intron 2 of 11)	1	94027343	94146926	119584	2	8412	uc001dpz.4	16399	ENSG00000137936	BCAR3	BCAR3, NSP family adaptor protein
chr1	94135714	94135901	188	*	CK6___lt__120_BAM_filter_on_data_707_peak_2673	105	.	8.34458	13.5799	10.5144	140	Intron (uc001dpz.4/8412, intron 2 of 11)	1	94027343	94146926	119584	2	8412	uc001dpz.4	11025	ENSG00000137936	BCAR3	BCAR3, NSP family adaptor protein
chr1	94146445	94146579	135	*	CK6___lt__120_BAM_filter_on_data_707_peak_2674	127	.	9.57919	15.95	12.7789	70	Promoter (<=1kb)	1	94027343	94146926	119584	2	8412	uc001dpz.4	347	ENSG00000137936	BCAR3	BCAR3, NSP family adaptor protein
chr1	94250092	94250469	378	*	CK6___lt__120_BAM_filter_on_data_707_peak_2681a	151	.	10.0822	18.4624	15.1899	161	Intron (uc001dqb.4/8412, intron 2 of 13)	1	94312388	94312467	80	1	100126348	uc021oqa.1	-61919	ENSG00000211575	MIR760	microRNA 760
chr1	94250092	94250469	378	*	CK6___lt__120_BAM_filter_on_data_707_peak_2681a	151	.	10.0822	18.4624	15.1899	161	Intron (uc001dqb.4/8412, intron 2 of 13)	1	94312388	94312467	80	1	100126348	uc021oqa.1	-61919	ENSG00000211575	MIR760	microRNA 760
chr1	94250092	94250469	378	*	CK6___lt__120_BAM_filter_on_data_707_peak_2681b	219	.	12.7744	25.5059	21.9851	295	Intron (uc001dqb.4/8412, intron 2 of 13)	1	94312388	94312467	80	1	100126348	uc021oqa.1	-61919	ENSG00000211575	MIR760	microRNA 760
chr1	94250092	94250469	378	*	CK6___lt__120_BAM_filter_on_data_707_peak_2681b	219	.	12.7744	25.5059	21.9851	295	Intron (uc001dqb.4/8412, intron 2 of 13)	1	94312388	94312467	80	1	100126348	uc021oqa.1	-61919	ENSG00000211575	MIR760	microRNA 760
chr1	94499508	94499718	211	*	CK6___lt__120_BAM_filter_on_data_707_peak_2689	181	.	12.0487	21.5233	18.1381	133	Intron (uc001dqh.3/24, intron 26 of 49)	1	94475933	94484228	8296	2	24	uc009wdp.1	-15280	ENSG00000198691	ABCA4	ATP binding cassette subfamily A member 4
chr1	94532721	94533144	424	*	CK6___lt__120_BAM_filter_on_data_707_peak_2690b	171	.	10.4056	20.4796	17.1323	302	Intron (uc001dqh.3/24, intron 11 of 49)	1	94475933	94484228	8296	2	24	uc009wdp.1	-48493	ENSG00000198691	ABCA4	ATP binding cassette subfamily A member 4
chr1	94532721	94533144	424	*	CK6___lt__120_BAM_filter_on_data_707_peak_2690b	171	.	10.4056	20.4796	17.1323	302	Intron (uc001dqh.3/24, intron 11 of 49)	1	94475933	94484228	8296	2	24	uc009wdp.1	-48493	ENSG00000198691	ABCA4	ATP binding cassette subfamily A member 4
chr1	94532721	94533144	424	*	CK6___lt__120_BAM_filter_on_data_707_peak_2690b	171	.	10.4056	20.4796	17.1323	302	Intron (uc001dqh.3/24, intron 11 of 49)	1	94475933	94484228	8296	2	24	uc009wdp.1	-48493	ENSG00000198691	ABCA4	ATP binding cassette subfamily A member 4
chr1	94621892	94622078	187	*	CK6___lt__120_BAM_filter_on_data_707_peak_2692	92	.	7.91048	12.2479	9.24653	83	Intron (uc009wdq.1/9411, intron 23 of 25)	1	94511193	94586705	75513	2	24	uc010otn.1	-35187	ENSG00000198691	ABCA4	ATP binding cassette subfamily A member 4
chr1	94929397	94929523	127	*	CK6___lt__120_BAM_filter_on_data_707_peak_2701	94	.	7.91013	12.4446	9.43327	70	Intron (uc001dqm.4/5825, intron 2 of 8)	1	94947049	94984219	37171	1	5825	uc001dqo.4	-17526	ENSG00000117528	ABCD3	ATP binding cassette subfamily D member 3
chr1	95171437	95171585	149	*	CK6___lt__120_BAM_filter_on_data_707_peak_2706	121	.	9.14915	15.3157	12.1709	74	Intron (uc001dqu.3/uc001dqu.3, intron 2 of 4)	1	95285898	95360803	74906	1	126969	uc001dqv.5	-114313	ENSG00000143036	SLC44A3	solute carrier family 44 member 3
chr1	95201233	95201452	220	*	CK6___lt__120_BAM_filter_on_data_707_peak_2707	85	.	7.08359	11.4806	8.51895	83	Intron (uc001dqu.3/uc001dqu.3, intron 1 of 4)	1	95285898	95360803	74906	1	126969	uc001dqv.5	-84446	ENSG00000143036	SLC44A3	solute carrier family 44 member 3
chr1	95283548	95283642	95	*	CK6___lt__120_BAM_filter_on_data_707_peak_2710	83	.	7.43709	11.3223	8.36911	106	Promoter (2-3kb)	1	95285898	95360803	74906	1	126969	uc001dqv.5	-2256	ENSG00000143036	SLC44A3	solute carrier family 44 member 3
chr1	95296848	95297147	300	*	CK6___lt__120_BAM_filter_on_data_707_peak_2711	183	.	11.7598	21.765	18.3713	151	Intron (uc001dqv.5/126969, intron 5 of 14)	1	95292995	95356823	63829	1	126969	uc010otu.1	3853	ENSG00000143036	SLC44A3	solute carrier family 44 member 3
chr1	95353674	95354078	405	*	CK6___lt__120_BAM_filter_on_data_707_peak_2714	91	.	7.84567	12.114	9.11812	171	Intron (uc001dqv.5/126969, intron 12 of 14)	1	95362507	95391337	28831	2	1266	uc010otv.2	37259	ENSG00000117519	CNN3	calponin 3
chr1	95384687	95385038	352	*	CK6___lt__120_BAM_filter_on_data_707_peak_2715b	183	.	11.1964	21.7925	18.3976	200	Intron (uc010otv.2/1266, intron 1 of 6)	1	95362507	95391337	28831	2	1266	uc010otv.2	6299	ENSG00000117519	CNN3	calponin 3
chr1	95385248	95385433	186	*	CK6___lt__120_BAM_filter_on_data_707_peak_2716	170	.	10.6875	20.4337	17.088	89	Intron (uc010otv.2/1266, intron 1 of 6)	1	95362507	95391337	28831	2	1266	uc010otv.2	5904	ENSG00000117519	CNN3	calponin 3
chr1	95508136	95508302	167	*	CK6___lt__120_BAM_filter_on_data_707_peak_2722	135	.	9.32425	16.7522	13.5478	97	Intron (uc001dra.2/199857, intron 2 of 3)	1	95448279	95538507	90229	2	199857	uc001dra.2	30205	ENSG00000172339	ALG14	ALG14, UDP-N-acetylglucosaminyltransferase subunit
chr1	95693196	95693459	264	*	CK6___lt__120_BAM_filter_on_data_707_peak_2725	146	.	9.45965	17.9068	14.6562	130	Intron (uc001drd.4/100527978, intron 6 of 7)	1	95699711	95710509	10799	1	100527978	uc009wdt.3	-6252	ENSG00000271092	TMEM56-RWDD3	TMEM56-RWDD3 readthrough
chr1	95693196	95693459	264	*	CK6___lt__120_BAM_filter_on_data_707_peak_2725	146	.	9.45965	17.9068	14.6562	130	Intron (uc001drd.4/100527978, intron 6 of 7)	1	95699711	95710509	10799	1	100527978	uc009wdt.3	-6252	ENSG00000271092	TMEM56-RWDD3	TMEM56-RWDD3 readthrough
chr1	97610841	97611357	517	*	CK6___lt__120_BAM_filter_on_data_707_peak_2747	133	.	9.66907	16.5306	13.3349	174	Intron (uc031pne.1/100873932, intron 1 of 4)	1	97561479	97788511	227033	1	100873932	uc031pne.1	49362	ENSG00000232878	DPYD-AS1	DPYD antisense RNA 1
chr1	97877929	97878166	238	*	CK6___lt__120_BAM_filter_on_data_707_peak_2749	105	.	8.5056	13.6085	10.5408	142	Intron (uc001drv.3/1806, intron 14 of 22)	1	97561479	97788511	227033	1	100873932	uc031pne.1	316450	ENSG00000232878	DPYD-AS1	DPYD antisense RNA 1
chr1	98693662	98693885	224	*	CK6___lt__120_BAM_filter_on_data_707_peak_2754	89	.	7.70023	11.9257	8.93893	82	Intron (uc031pnf.1/729987, intron 1 of 2)	1	98676267	98738214	61948	1	729987	uc031pnf.1	17395	ENSG00000226053	LINC01776	long intergenic non-protein coding RNA 1776
chr1	99440728	99441024	297	*	CK6___lt__120_BAM_filter_on_data_707_peak_2764	480	.	20.4775	52.2631	48.0418	163	Intron (uc001dsb.3/163404, intron 1 of 5)	1	99469832	99614408	144577	1	100129620	uc001dsd.1	-28808	ENSG00000232825	LOC100129620	uncharacterized LOC100129620
chr1	100619629	100619794	166	*	CK6___lt__120_BAM_filter_on_data_707_peak_2777	168	.	11.6016	20.2345	16.8958	100	Intron (uc001dsw.2/127495, intron 8 of 9)	1	100598706	100616054	17349	1	54482	uc010ouf.2	20923	ENSG00000122435	TRMT13	tRNA methyltransferase 13 homolog
chr1	100678758	100679075	318	*	CK6___lt__120_BAM_filter_on_data_707_peak_2778	422	.	21.5911	46.3035	42.2179	129	Intron (uc001dta.3/1629, intron 7 of 10)	1	100614004	100643829	29826	2	127495	uc001dsz.2	-34929	ENSG00000122477	LRRC39	leucine rich repeat containing 39
chr1	104163778	104163998	221	*	CK6___lt__120_BAM_filter_on_data_707_peak_2807	869	.	34.4761	91.9031	86.9908	93	Intron (uc001dut.3/279, intron 5 of 9)	1	104159999	104168400	8402	1	279	uc001dut.3	3779	ENSG00000243480	AMY2A	amylase, alpha 2A (pancreatic)
chr1	108113079	108113523	445	*	CK6___lt__120_BAM_filter_on_data_707_peak_2852a	303	.	16.7826	34.1108	30.3352	93	Downstream (<1kb)	1	108113782	108220631	106850	2	10451	uc010ouu.1	107108	ENSG00000134215	VAV3	vav guanine nucleotide exchange factor 3
chr1	108207725	108208365	641	*	CK6___lt__120_BAM_filter_on_data_707_peak_2855a	743	.	20.2605	79.0514	74.3434	185	Intron (uc010ouu.1/10451, intron 1 of 9)	1	108113782	108220631	106850	2	10451	uc010ouu.1	12266	ENSG00000134215	VAV3	vav guanine nucleotide exchange factor 3
chr1	108207725	108208365	641	*	CK6___lt__120_BAM_filter_on_data_707_peak_2855a	743	.	20.2605	79.0514	74.3434	185	Intron (uc010ouu.1/10451, intron 1 of 9)	1	108113782	108220631	106850	2	10451	uc010ouu.1	12266	ENSG00000134215	VAV3	vav guanine nucleotide exchange factor 3
chr1	108207725	108208365	641	*	CK6___lt__120_BAM_filter_on_data_707_peak_2855a	743	.	20.2605	79.0514	74.3434	185	Intron (uc010ouu.1/10451, intron 1 of 9)	1	108113782	108220631	106850	2	10451	uc010ouu.1	12266	ENSG00000134215	VAV3	vav guanine nucleotide exchange factor 3
chr1	108207725	108208365	641	*	CK6___lt__120_BAM_filter_on_data_707_peak_2855b	276	.	10.6146	31.3946	27.6961	411	Intron (uc010ouu.1/10451, intron 1 of 9)	1	108113782	108220631	106850	2	10451	uc010ouu.1	12266	ENSG00000134215	VAV3	vav guanine nucleotide exchange factor 3
chr1	108207725	108208365	641	*	CK6___lt__120_BAM_filter_on_data_707_peak_2855b	276	.	10.6146	31.3946	27.6961	411	Intron (uc010ouu.1/10451, intron 1 of 9)	1	108113782	108220631	106850	2	10451	uc010ouu.1	12266	ENSG00000134215	VAV3	vav guanine nucleotide exchange factor 3
chr1	108207725	108208365	641	*	CK6___lt__120_BAM_filter_on_data_707_peak_2855b	276	.	10.6146	31.3946	27.6961	411	Intron (uc010ouu.1/10451, intron 1 of 9)	1	108113782	108220631	106850	2	10451	uc010ouu.1	12266	ENSG00000134215	VAV3	vav guanine nucleotide exchange factor 3
chr1	108233217	108233511	295	*	CK6___lt__120_BAM_filter_on_data_707_peak_2857	357	.	14.1962	39.7169	35.7916	144	Promoter (2-3kb)	1	108113782	108231126	117345	2	10451	uc010ouv.1	-2091	ENSG00000134215	VAV3	vav guanine nucleotide exchange factor 3
chr1	108240807	108241108	302	*	CK6___lt__120_BAM_filter_on_data_707_peak_2858a	194	.	10.8788	22.9	19.4662	116	Intron (uc001dvk.1/10451, intron 17 of 26)	1	108113782	108231126	117345	2	10451	uc010ouv.1	-9681	ENSG00000134215	VAV3	vav guanine nucleotide exchange factor 3
chr1	108240807	108241108	302	*	CK6___lt__120_BAM_filter_on_data_707_peak_2858a	194	.	10.8788	22.9	19.4662	116	Intron (uc001dvk.1/10451, intron 17 of 26)	1	108113782	108231126	117345	2	10451	uc010ouv.1	-9681	ENSG00000134215	VAV3	vav guanine nucleotide exchange factor 3
chr1	108240807	108241108	302	*	CK6___lt__120_BAM_filter_on_data_707_peak_2858b	170	.	10.0085	20.3465	17.0039	230	Intron (uc001dvk.1/10451, intron 17 of 26)	1	108113782	108231126	117345	2	10451	uc010ouv.1	-9681	ENSG00000134215	VAV3	vav guanine nucleotide exchange factor 3
chr1	108240807	108241108	302	*	CK6___lt__120_BAM_filter_on_data_707_peak_2858b	170	.	10.0085	20.3465	17.0039	230	Intron (uc001dvk.1/10451, intron 17 of 26)	1	108113782	108231126	117345	2	10451	uc010ouv.1	-9681	ENSG00000134215	VAV3	vav guanine nucleotide exchange factor 3
chr1	108281855	108282223	369	*	CK6___lt__120_BAM_filter_on_data_707_peak_2860a	486	.	17.6144	52.8354	48.6019	224	Intron (uc001dvk.1/10451, intron 15 of 26)	1	108113782	108231126	117345	2	10451	uc010ouv.1	-50729	ENSG00000134215	VAV3	vav guanine nucleotide exchange factor 3
chr1	108281855	108282223	369	*	CK6___lt__120_BAM_filter_on_data_707_peak_2860a	486	.	17.6144	52.8354	48.6019	224	Intron (uc001dvk.1/10451, intron 15 of 26)	1	108113782	108231126	117345	2	10451	uc010ouv.1	-50729	ENSG00000134215	VAV3	vav guanine nucleotide exchange factor 3
chr1	109113838	109114111	274	*	CK6___lt__120_BAM_filter_on_data_707_peak_2893	246	.	13.7548	28.2904	24.6829	74	Intron (uc010ouy.2/284611, intron 1 of 10)	1	109102971	109181949	78979	1	284611	uc010ouy.2	10867	ENSG00000162636	FAM102B	family with sequence similarity 102 member B
chr1	109189192	109189570	379	*	CK6___lt__120_BAM_filter_on_data_707_peak_2896	328	.	14.0736	36.6797	32.8342	186	Downstream (1-2kb)	1	109190910	109203744	12835	2	113802	uc001dvt.4	14174	ENSG00000162639	HENMT1	HEN methyltransferase 1
chr1	109234837	109234951	115	*	CK6___lt__120_BAM_filter_on_data_707_peak_2899	107	.	8.60259	13.7888	10.713	56	Promoter (<=1kb)	1	109234932	109244422	9491	1	55119	uc001dvv.4	0	ENSG00000134186	PRPF38B	pre-mRNA processing factor 38B
chr1	109289090	109289272	183	*	CK6___lt__120_BAM_filter_on_data_707_peak_2900	145	.	10.5016	17.7588	14.5139	88	Promoter (<=1kb)	1	109289285	109319053	29769	1	6814	uc021oqz.1	-13	ENSG00000116266	STXBP3	syntaxin binding protein 3
chr1	109359003	109359262	260	*	CK6___lt__120_BAM_filter_on_data_707_peak_2903b	168	.	9.29853	20.2068	16.8695	242	Intron (uc001dwa.4/254268, intron 15 of 15)	1	109358520	109399726	41207	2	254268	uc001dwa.4	40464	ENSG00000162641	AKNAD1	AKNA domain containing 1
chr1	109359766	109360059	294	*	CK6___lt__120_BAM_filter_on_data_707_peak_2904	211	.	10.9035	24.6715	21.1776	117	Exon (uc001dwa.4/254268, exon 15 of 16)	1	109358520	109399726	41207	2	254268	uc001dwa.4	39667	ENSG00000162641	AKNAD1	AKNA domain containing 1
chr1	109554033	109554265	233	*	CK6___lt__120_BAM_filter_on_data_707_peak_2909	150	.	10.4919	18.331	15.0638	159	Exon (uc010ovf.2/22911, exon 3 of 13)	1	109512838	109560223	47386	2	22911	uc010ovf.2	5958	ENSG00000085433	WDR47	WD repeat domain 47
chr1	109618623	109618792	170	*	CK6___lt__120_BAM_filter_on_data_707_peak_2912	157	.	10.8775	19.0249	15.7304	73	Promoter (<=1kb)	1	109606998	109618624	11627	2	6884	uc001dwm.1	0	ENSG00000197780	TAF13	TATA-box binding protein associated factor 13
chr1	109642656	109642849	194	*	CK6___lt__120_BAM_filter_on_data_707_peak_2914	155	.	10.3342	18.8836	15.5951	172	Promoter (<=1kb)	1	109642815	109643234	420	1	677766	uc001dwo.1	0	ENSG00000278249	SCARNA2	small Cajal body-specific RNA 2
chr1	109780207	109780418	212	*	CK6___lt__120_BAM_filter_on_data_707_peak_2918	99	.	8.25458	12.9803	9.94411	111	Exon (uc001dwu.2/6301, exon 11 of 11)	1	109792641	109818378	25738	1	1952	uc001dxa.4	-12223	ENSG00000143126	CELSR2	cadherin EGF LAG seven-pass G-type receptor 2
chr1	109806024	109806583	560	*	CK6___lt__120_BAM_filter_on_data_707_peak_2919a	124	.	8.65475	15.6499	12.4914	182	Exon (uc001dxa.4/1952, exon 9 of 34)	1	109792641	109818378	25738	1	1952	uc001dxa.4	13383	ENSG00000143126	CELSR2	cadherin EGF LAG seven-pass G-type receptor 2
chr1	109806024	109806583	560	*	CK6___lt__120_BAM_filter_on_data_707_peak_2919a	124	.	8.65475	15.6499	12.4914	182	Exon (uc001dxa.4/1952, exon 9 of 34)	1	109792641	109818378	25738	1	1952	uc001dxa.4	13383	ENSG00000143126	CELSR2	cadherin EGF LAG seven-pass G-type receptor 2
chr1	109806024	109806583	560	*	CK6___lt__120_BAM_filter_on_data_707_peak_2919a	124	.	8.65475	15.6499	12.4914	182	Exon (uc001dxa.4/1952, exon 9 of 34)	1	109792641	109818378	25738	1	1952	uc001dxa.4	13383	ENSG00000143126	CELSR2	cadherin EGF LAG seven-pass G-type receptor 2
chr1	109806024	109806583	560	*	CK6___lt__120_BAM_filter_on_data_707_peak_2919b	161	.	10.0972	19.4554	16.145	434	Exon (uc001dxa.4/1952, exon 9 of 34)	1	109792641	109818378	25738	1	1952	uc001dxa.4	13383	ENSG00000143126	CELSR2	cadherin EGF LAG seven-pass G-type receptor 2
chr1	109806024	109806583	560	*	CK6___lt__120_BAM_filter_on_data_707_peak_2919b	161	.	10.0972	19.4554	16.145	434	Exon (uc001dxa.4/1952, exon 9 of 34)	1	109792641	109818378	25738	1	1952	uc001dxa.4	13383	ENSG00000143126	CELSR2	cadherin EGF LAG seven-pass G-type receptor 2
chr1	109806024	109806583	560	*	CK6___lt__120_BAM_filter_on_data_707_peak_2919b	161	.	10.0972	19.4554	16.145	434	Exon (uc001dxa.4/1952, exon 9 of 34)	1	109792641	109818378	25738	1	1952	uc001dxa.4	13383	ENSG00000143126	CELSR2	cadherin EGF LAG seven-pass G-type receptor 2
chr1	109817464	109817734	271	*	CK6___lt__120_BAM_filter_on_data_707_peak_2920	387	.	17.591	42.7572	38.7549	186	3' UTR	1	109822176	109825041	2866	2	84722	uc001dxb.3	7307	ENSG00000134222	PSRC1	proline and serine rich coiled-coil 1
chr1	109825816	109826013	198	*	CK6___lt__120_BAM_filter_on_data_707_peak_2921	205	.	12.2421	24.069	20.5951	95	Promoter (<=1kb)	1	109822176	109825808	3633	2	84722	uc001dxj.3	-8	ENSG00000134222	PSRC1	proline and serine rich coiled-coil 1
chr1	109842395	109842543	149	*	CK6___lt__120_BAM_filter_on_data_707_peak_2923	154	.	10.4777	18.6918	15.4108	65	Intron (uc001dxk.1/343263, intron 1 of 8)	1	109834987	109849663	14677	2	343263	uc001dxk.1	7120	ENSG00000221986	MYBPHL	myosin binding protein H like
chr1	109913861	109914284	424	*	CK6___lt__120_BAM_filter_on_data_707_peak_2928a	107	.	7.78686	13.7937	10.7178	117	Intron (uc010ovi.2/6272, intron 1 of 19)	1	109852188	109935979	83792	2	6272	uc010ovi.2	21695	ENSG00000134243	SORT1	sortilin 1
chr1	109913861	109914284	424	*	CK6___lt__120_BAM_filter_on_data_707_peak_2928a	107	.	7.78686	13.7937	10.7178	117	Intron (uc010ovi.2/6272, intron 1 of 19)	1	109852188	109935979	83792	2	6272	uc010ovi.2	21695	ENSG00000134243	SORT1	sortilin 1
chr1	109913861	109914284	424	*	CK6___lt__120_BAM_filter_on_data_707_peak_2928b	95	.	7.30958	12.6032	9.58456	325	Intron (uc010ovi.2/6272, intron 1 of 19)	1	109852188	109935979	83792	2	6272	uc010ovi.2	21695	ENSG00000134243	SORT1	sortilin 1
chr1	109913861	109914284	424	*	CK6___lt__120_BAM_filter_on_data_707_peak_2928b	95	.	7.30958	12.6032	9.58456	325	Intron (uc010ovi.2/6272, intron 1 of 19)	1	109852188	109935979	83792	2	6272	uc010ovi.2	21695	ENSG00000134243	SORT1	sortilin 1
chr1	109940533	109940811	279	*	CK6___lt__120_BAM_filter_on_data_707_peak_2930b	215	.	8.74055	25.1036	21.5961	170	Promoter (<=1kb)	1	109852188	109940563	88376	2	6272	uc001dxm.2	0	ENSG00000134243	SORT1	sortilin 1
chr1	109941877	109942214	338	*	CK6___lt__120_BAM_filter_on_data_707_peak_2931a	529	.	15.5296	57.2634	52.9407	81	Promoter (1-2kb)	1	109852188	109940563	88376	2	6272	uc001dxm.2	-1314	ENSG00000134243	SORT1	sortilin 1
chr1	109941877	109942214	338	*	CK6___lt__120_BAM_filter_on_data_707_peak_2931a	529	.	15.5296	57.2634	52.9407	81	Promoter (1-2kb)	1	109852188	109940563	88376	2	6272	uc001dxm.2	-1314	ENSG00000134243	SORT1	sortilin 1
chr1	109941877	109942214	338	*	CK6___lt__120_BAM_filter_on_data_707_peak_2931b	298	.	10.786	33.6149	29.8535	240	Promoter (1-2kb)	1	109852188	109940563	88376	2	6272	uc001dxm.2	-1314	ENSG00000134243	SORT1	sortilin 1
chr1	109941877	109942214	338	*	CK6___lt__120_BAM_filter_on_data_707_peak_2931b	298	.	10.786	33.6149	29.8535	240	Promoter (1-2kb)	1	109852188	109940563	88376	2	6272	uc001dxm.2	-1314	ENSG00000134243	SORT1	sortilin 1
chr1	109955241	109955523	283	*	CK6___lt__120_BAM_filter_on_data_707_peak_2932	289	.	15.6197	32.6427	28.9084	125	Intron (uc001dxn.3/5686, intron 4 of 8)	1	109941653	109969070	27418	2	5686	uc001dxn.3	13547	ENSG00000143106	PSMA5	proteasome subunit alpha 5
chr1	109969060	109969441	382	*	CK6___lt__120_BAM_filter_on_data_707_peak_2933	630	.	20.5964	67.5556	63.0442	138	Promoter (<=1kb)	1	109941653	109969070	27418	2	5686	uc001dxn.3	0	ENSG00000143106	PSMA5	proteasome subunit alpha 5
chr1	110091126	110091258	133	*	CK6___lt__120_BAM_filter_on_data_707_peak_2938	154	.	10.5128	18.7523	15.4684	109	Promoter (<=1kb)	1	110091186	110138454	47269	1	2773	uc001dxz.3	0	ENSG00000065135	GNAI3	G protein subunit alpha i3
chr1	110210571	110210679	109	*	CK6___lt__120_BAM_filter_on_data_707_peak_2944	88	.	7.45794	11.8012	8.8229	84	Promoter (<=1kb)	1	110210644	110217908	7265	1	2946	uc001dyj.3	0	ENSG00000213366	GSTM2	glutathione S-transferase mu 2
chr1	110527226	110527452	227	*	CK6___lt__120_BAM_filter_on_data_707_peak_2955	87	.	7.23068	11.72	8.74646	72	Promoter (<=1kb)	1	110527387	110566364	38978	1	10768	uc001dyx.3	0	ENSG00000168710	AHCYL1	adenosylhomocysteinase like 1
chr1	110538920	110539432	513	*	CK6___lt__120_BAM_filter_on_data_707_peak_2956a	246	.	10.8796	28.235	24.6288	205	Intron (uc001dyx.3/10768, intron 1 of 16)	1	110543549	110566364	22816	1	10768	uc021ork.1	-4117	ENSG00000168710	AHCYL1	adenosylhomocysteinase like 1
chr1	110538920	110539432	513	*	CK6___lt__120_BAM_filter_on_data_707_peak_2956a	246	.	10.8796	28.235	24.6288	205	Intron (uc001dyx.3/10768, intron 1 of 16)	1	110543549	110566364	22816	1	10768	uc021ork.1	-4117	ENSG00000168710	AHCYL1	adenosylhomocysteinase like 1
chr1	110538920	110539432	513	*	CK6___lt__120_BAM_filter_on_data_707_peak_2956a	246	.	10.8796	28.235	24.6288	205	Intron (uc001dyx.3/10768, intron 1 of 16)	1	110543549	110566364	22816	1	10768	uc021ork.1	-4117	ENSG00000168710	AHCYL1	adenosylhomocysteinase like 1
chr1	110538920	110539432	513	*	CK6___lt__120_BAM_filter_on_data_707_peak_2956b	270	.	11.5196	30.6821	27.0043	413	Intron (uc001dyx.3/10768, intron 1 of 16)	1	110543549	110566364	22816	1	10768	uc021ork.1	-4117	ENSG00000168710	AHCYL1	adenosylhomocysteinase like 1
chr1	110538920	110539432	513	*	CK6___lt__120_BAM_filter_on_data_707_peak_2956b	270	.	11.5196	30.6821	27.0043	413	Intron (uc001dyx.3/10768, intron 1 of 16)	1	110543549	110566364	22816	1	10768	uc021ork.1	-4117	ENSG00000168710	AHCYL1	adenosylhomocysteinase like 1
chr1	110538920	110539432	513	*	CK6___lt__120_BAM_filter_on_data_707_peak_2956b	270	.	11.5196	30.6821	27.0043	413	Intron (uc001dyx.3/10768, intron 1 of 16)	1	110543549	110566364	22816	1	10768	uc021ork.1	-4117	ENSG00000168710	AHCYL1	adenosylhomocysteinase like 1
chr1	110720439	110720705	267	*	CK6___lt__120_BAM_filter_on_data_707_peak_2961	153	.	10.7929	18.5823	15.3052	269	Intron (uc009wfq.3/388662, intron 6 of 11)	1	110735128	110737566	2439	1	388662	uc001dze.1	-14423	ENSG00000197106	SLC6A17	solute carrier family 6 member 17
chr1	110730844	110731120	277	*	CK6___lt__120_BAM_filter_on_data_707_peak_2962	249	.	12.8116	28.5302	24.9154	165	Intron (uc009wfq.3/388662, intron 6 of 11)	1	110735128	110737566	2439	1	388662	uc001dze.1	-4008	ENSG00000197106	SLC6A17	solute carrier family 6 member 17
chr1	110881399	110882029	631	*	CK6___lt__120_BAM_filter_on_data_707_peak_2963a	290	.	10.4256	32.8307	29.0908	181	Promoter (<=1kb)	1	110828999	110881793	52795	2	440600	uc001dzj.3	0	ENSG00000227963	RBM15-AS1	RBM15 antisense RNA 1
chr1	110881399	110882029	631	*	CK6___lt__120_BAM_filter_on_data_707_peak_2963a	290	.	10.4256	32.8307	29.0908	181	Promoter (<=1kb)	1	110828999	110881793	52795	2	440600	uc001dzj.3	0	ENSG00000227963	RBM15-AS1	RBM15 antisense RNA 1
chr1	110881399	110882029	631	*	CK6___lt__120_BAM_filter_on_data_707_peak_2963b	732	.	18.9908	77.9807	73.2919	572	Promoter (<=1kb)	1	110828999	110881793	52795	2	440600	uc001dzj.3	0	ENSG00000227963	RBM15-AS1	RBM15 antisense RNA 1
chr1	110881399	110882029	631	*	CK6___lt__120_BAM_filter_on_data_707_peak_2963b	732	.	18.9908	77.9807	73.2919	572	Promoter (<=1kb)	1	110828999	110881793	52795	2	440600	uc001dzj.3	0	ENSG00000227963	RBM15-AS1	RBM15 antisense RNA 1
chr1	110950230	110950403	174	*	CK6___lt__120_BAM_filter_on_data_707_peak_2968	139	.	9.58079	17.1778	13.9558	113	Promoter (<=1kb)	1	110950431	110958896	8466	1	101410535	uc031pnm.1	-28	NA	LAMTOR5-AS1	LAMTOR5 antisense RNA 1
chr1	110955218	110955358	141	*	CK6___lt__120_BAM_filter_on_data_707_peak_2969	181	.	11.8949	21.5833	18.1959	94	Intron (uc031pnm.1/101410535, intron 2 of 2)	1	110943877	110950546	6670	2	10542	uc001dzr.3	-4672	ENSG00000134248	LAMTOR5	late endosomal/lysosomal adaptor, MAPK and MTOR activator 5
chr1	111742792	111743013	222	*	CK6___lt__120_BAM_filter_on_data_707_peak_2987	113	.	8.94246	14.4386	11.3338	171	Promoter (<=1kb)	1	111728591	111743325	14735	2	79961	uc001eak.2	312	ENSG00000162777	DENND2D	DENN domain containing 2D
chr1	111991817	111992113	297	*	CK6___lt__120_BAM_filter_on_data_707_peak_2992a	101	.	8.38713	13.2419	10.1931	98	Promoter (<=1kb)	1	111982512	111991830	9319	2	79084	uc001ebb.3	0	ENSG00000116455	WDR77	WD repeat domain 77
chr1	111991817	111992113	297	*	CK6___lt__120_BAM_filter_on_data_707_peak_2992b	101	.	8.35359	13.1752	10.1288	181	Promoter (<=1kb)	1	111982512	111991830	9319	2	79084	uc001ebb.3	0	ENSG00000116455	WDR77	WD repeat domain 77
chr1	112024342	112024457	116	*	CK6___lt__120_BAM_filter_on_data_707_peak_2994	135	.	10.0103	16.7373	13.5335	87	Downstream (1-2kb)	1	112016604	112021134	4531	1	128346	uc001ebe.3	7738	ENSG00000143110	C1orf162	chromosome 1 open reading frame 162
chr1	112032412	112032709	298	*	CK6___lt__120_BAM_filter_on_data_707_peak_2995	335	.	17.2933	37.3776	33.5138	214	Intron (uc001ebf.3/140, intron 2 of 5)	1	112025970	112046743	20774	2	140	uc001ebf.3	14034	ENSG00000282608	ADORA3	adenosine A3 receptor
chr1	112056282	112056462	181	*	CK6___lt__120_BAM_filter_on_data_707_peak_2997	89	.	7.48567	11.8849	8.90069	102	Intron (uc001ebg.4/140, intron 1 of 5)	1	112042051	112046743	4693	2	140	uc001ebh.4	-9539	ENSG00000282608	ADORA3	adenosine A3 receptor
chr1	112107781	112108025	245	*	CK6___lt__120_BAM_filter_on_data_707_peak_2998	174	.	11.482	20.8494	17.4884	165	Promoter (1-2kb)	1	112025970	112106597	80628	2	140	uc001ebg.4	-1184	ENSG00000282608	ADORA3	adenosine A3 receptor
chr1	112107781	112108025	245	*	CK6___lt__120_BAM_filter_on_data_707_peak_2998	174	.	11.482	20.8494	17.4884	165	Promoter (1-2kb)	1	112025970	112106597	80628	2	140	uc001ebg.4	-1184	ENSG00000282608	ADORA3	adenosine A3 receptor
chr1	112298193	112298576	384	*	CK6___lt__120_BAM_filter_on_data_707_peak_3005a	228	.	11.9163	26.4028	22.8536	59	Promoter (<=1kb)	1	112264686	112298419	33734	2	55924	uc001ebp.2	0	ENSG00000197852	FAM212B	family with sequence similarity 212 member B
chr1	112298193	112298576	384	*	CK6___lt__120_BAM_filter_on_data_707_peak_3005a	228	.	11.9163	26.4028	22.8536	59	Promoter (<=1kb)	1	112264686	112298419	33734	2	55924	uc001ebp.2	0	ENSG00000197852	FAM212B	family with sequence similarity 212 member B
chr1	112298193	112298576	384	*	CK6___lt__120_BAM_filter_on_data_707_peak_3005b	143	.	8.9591	17.5684	14.3308	274	Promoter (<=1kb)	1	112264686	112298419	33734	2	55924	uc001ebp.2	0	ENSG00000197852	FAM212B	family with sequence similarity 212 member B
chr1	112298193	112298576	384	*	CK6___lt__120_BAM_filter_on_data_707_peak_3005b	143	.	8.9591	17.5684	14.3308	274	Promoter (<=1kb)	1	112264686	112298419	33734	2	55924	uc001ebp.2	0	ENSG00000197852	FAM212B	family with sequence similarity 212 member B
chr1	112332424	112332585	162	*	CK6___lt__120_BAM_filter_on_data_707_peak_3006	118	.	9.19681	14.9462	11.8183	121	Intron (uc001ebu.1/3752, intron 2 of 7)	1	112303019	112310199	7181	1	11218	uc001ebt.3	29405	ENSG00000064703	DDX20	DEAD-box helicase 20
chr1	112482452	112482789	338	*	CK6___lt__120_BAM_filter_on_data_707_peak_3008	184	.	12.0685	21.8975	18.499	227	Intron (uc001ebu.1/3752, intron 2 of 7)	1	112318454	112531777	213324	2	3752	uc001ebu.1	48988	ENSG00000171385	KCND3	potassium voltage-gated channel subfamily D member 3
chr1	112482452	112482789	338	*	CK6___lt__120_BAM_filter_on_data_707_peak_3008	184	.	12.0685	21.8975	18.499	227	Intron (uc001ebu.1/3752, intron 2 of 7)	1	112318454	112531777	213324	2	3752	uc001ebu.1	48988	ENSG00000171385	KCND3	potassium voltage-gated channel subfamily D member 3
chr1	113247771	113247897	127	*	CK6___lt__120_BAM_filter_on_data_707_peak_3031	116	.	8.64846	14.7965	11.6753	71	Promoter (1-2kb)	1	113243749	113249678	5930	2	389	uc001ecp.1	1781	ENSG00000155366	RHOC	ras homolog family member C
chr1	113257982	113258205	224	*	CK6___lt__120_BAM_filter_on_data_707_peak_3032	410	.	19.006	45.1516	41.0924	137	Promoter (<=1kb)	1	113252616	113257950	5335	2	333926	uc001ect.1	-32	ENSG00000155367	PPM1J	protein phosphatase, Mg2+/Mn2+ dependent 1J
chr1	113265345	113265530	186	*	CK6___lt__120_BAM_filter_on_data_707_peak_3034	94	.	6.96258	12.4406	9.42983	81	Promoter (2-3kb)	1	113263189	113269856	6668	1	284467	uc010owl.2	2156	ENSG00000184599	FAM19A3	family with sequence similarity 19 member A3, C-C motif chemokine like
chr1	113372420	113372678	259	*	CK6___lt__120_BAM_filter_on_data_707_peak_3042	417	.	18.5169	45.8219	41.7475	175	Intron (uc001ecw.1/uc001ecw.1, intron 3 of 6)	1	113465972	113467295	1324	1	246182	uc001eda.1	-93294	NA	AKR7A2P1	aldo-keto reductase family 7 member A2 pseudogene 1
chr1	113383296	113383632	337	*	CK6___lt__120_BAM_filter_on_data_707_peak_3043a	618	.	19.9493	66.3202	61.831	86	Intron (uc001ecw.1/uc001ecw.1, intron 2 of 6)	1	113465972	113467295	1324	1	246182	uc001eda.1	-82340	NA	AKR7A2P1	aldo-keto reductase family 7 member A2 pseudogene 1
chr1	113383296	113383632	337	*	CK6___lt__120_BAM_filter_on_data_707_peak_3043a	618	.	19.9493	66.3202	61.831	86	Intron (uc001ecw.1/uc001ecw.1, intron 2 of 6)	1	113465972	113467295	1324	1	246182	uc001eda.1	-82340	NA	AKR7A2P1	aldo-keto reductase family 7 member A2 pseudogene 1
chr1	113383296	113383632	337	*	CK6___lt__120_BAM_filter_on_data_707_peak_3043b	357	.	13.8103	39.7016	35.7767	256	Intron (uc001ecw.1/uc001ecw.1, intron 2 of 6)	1	113465972	113467295	1324	1	246182	uc001eda.1	-82340	NA	AKR7A2P1	aldo-keto reductase family 7 member A2 pseudogene 1
chr1	113383296	113383632	337	*	CK6___lt__120_BAM_filter_on_data_707_peak_3043b	357	.	13.8103	39.7016	35.7767	256	Intron (uc001ecw.1/uc001ecw.1, intron 2 of 6)	1	113465972	113467295	1324	1	246182	uc001eda.1	-82340	NA	AKR7A2P1	aldo-keto reductase family 7 member A2 pseudogene 1
chr1	113415162	113415635	474	*	CK6___lt__120_BAM_filter_on_data_707_peak_3047a	108	.	8.14286	13.9626	10.8797	236	Intron (uc021orw.1/uc021orw.1, intron 1 of 1)	1	113465972	113467295	1324	1	246182	uc001eda.1	-50337	NA	AKR7A2P1	aldo-keto reductase family 7 member A2 pseudogene 1
chr1	113415162	113415635	474	*	CK6___lt__120_BAM_filter_on_data_707_peak_3047a	108	.	8.14286	13.9626	10.8797	236	Intron (uc021orw.1/uc021orw.1, intron 1 of 1)	1	113465972	113467295	1324	1	246182	uc001eda.1	-50337	NA	AKR7A2P1	aldo-keto reductase family 7 member A2 pseudogene 1
chr1	113498794	113499102	309	*	CK6___lt__120_BAM_filter_on_data_707_peak_3051	356	.	15.7486	39.6118	35.689	108	Promoter (<=1kb)	1	113454470	113498975	44506	2	6566	uc001ecy.3	0	ENSG00000155380	SLC16A1	solute carrier family 16 member 1
chr1	113615315	113615844	530	*	CK6___lt__120_BAM_filter_on_data_707_peak_3056a	420	.	16.0788	46.1239	42.0427	77	Promoter (<=1kb)	1	113615831	113667342	51512	1	9860	uc001edf.1	0	ENSG00000198799	LRIG2	leucine rich repeats and immunoglobulin like domains 2
chr1	113615315	113615844	530	*	CK6___lt__120_BAM_filter_on_data_707_peak_3056a	420	.	16.0788	46.1239	42.0427	77	Promoter (<=1kb)	1	113615831	113667342	51512	1	9860	uc001edf.1	0	ENSG00000198799	LRIG2	leucine rich repeats and immunoglobulin like domains 2
chr1	113615315	113615844	530	*	CK6___lt__120_BAM_filter_on_data_707_peak_3056a	420	.	16.0788	46.1239	42.0427	77	Promoter (<=1kb)	1	113615831	113667342	51512	1	9860	uc001edf.1	0	ENSG00000198799	LRIG2	leucine rich repeats and immunoglobulin like domains 2
chr1	113615315	113615844	530	*	CK6___lt__120_BAM_filter_on_data_707_peak_3056b	106	.	6.9908	13.7597	10.6855	213	Promoter (<=1kb)	1	113615831	113667342	51512	1	9860	uc001edf.1	0	ENSG00000198799	LRIG2	leucine rich repeats and immunoglobulin like domains 2
chr1	113615315	113615844	530	*	CK6___lt__120_BAM_filter_on_data_707_peak_3056b	106	.	6.9908	13.7597	10.6855	213	Promoter (<=1kb)	1	113615831	113667342	51512	1	9860	uc001edf.1	0	ENSG00000198799	LRIG2	leucine rich repeats and immunoglobulin like domains 2
chr1	113615315	113615844	530	*	CK6___lt__120_BAM_filter_on_data_707_peak_3056b	106	.	6.9908	13.7597	10.6855	213	Promoter (<=1kb)	1	113615831	113667342	51512	1	9860	uc001edf.1	0	ENSG00000198799	LRIG2	leucine rich repeats and immunoglobulin like domains 2
chr1	113615315	113615844	530	*	CK6___lt__120_BAM_filter_on_data_707_peak_3056c	148	.	8.38896	18.094	14.8357	317	Promoter (<=1kb)	1	113615831	113667342	51512	1	9860	uc001edf.1	0	ENSG00000198799	LRIG2	leucine rich repeats and immunoglobulin like domains 2
chr1	113615315	113615844	530	*	CK6___lt__120_BAM_filter_on_data_707_peak_3056c	148	.	8.38896	18.094	14.8357	317	Promoter (<=1kb)	1	113615831	113667342	51512	1	9860	uc001edf.1	0	ENSG00000198799	LRIG2	leucine rich repeats and immunoglobulin like domains 2
chr1	113615315	113615844	530	*	CK6___lt__120_BAM_filter_on_data_707_peak_3056c	148	.	8.38896	18.094	14.8357	317	Promoter (<=1kb)	1	113615831	113667342	51512	1	9860	uc001edf.1	0	ENSG00000198799	LRIG2	leucine rich repeats and immunoglobulin like domains 2
chr1	113932690	113933019	330	*	CK6___lt__120_BAM_filter_on_data_707_peak_3065	152	.	10.4081	18.5725	15.296	263	Promoter (<=1kb)	1	113933475	114224924	291450	1	260425	uc001edh.3	-456	ENSG00000081026	MAGI3	membrane associated guanylate kinase, WW and PDZ domain containing 3
chr1	113932690	113933019	330	*	CK6___lt__120_BAM_filter_on_data_707_peak_3065	152	.	10.4081	18.5725	15.296	263	Promoter (<=1kb)	1	113933475	114224924	291450	1	260425	uc001edh.3	-456	ENSG00000081026	MAGI3	membrane associated guanylate kinase, WW and PDZ domain containing 3
chr1	113948302	113948432	131	*	CK6___lt__120_BAM_filter_on_data_707_peak_3066c	239	.	12.252	27.5831	23.9977	632	Intron (uc001edh.3/260425, intron 1 of 21)	1	113933475	114228545	295071	1	260425	uc010owm.2	14827	ENSG00000081026	MAGI3	membrane associated guanylate kinase, WW and PDZ domain containing 3
chr1	113948775	113949139	365	*	CK6___lt__120_BAM_filter_on_data_707_peak_3066c	239	.	12.252	27.5831	23.9977	632	Intron (uc001edh.3/260425, intron 1 of 21)	1	113933475	114228545	295071	1	260425	uc010owm.2	15300	ENSG00000081026	MAGI3	membrane associated guanylate kinase, WW and PDZ domain containing 3
chr1	113948302	113948432	131	*	CK6___lt__120_BAM_filter_on_data_707_peak_3066d	189	.	10.5365	22.3239	18.9102	705	Intron (uc001edh.3/260425, intron 1 of 21)	1	113933475	114228545	295071	1	260425	uc010owm.2	14827	ENSG00000081026	MAGI3	membrane associated guanylate kinase, WW and PDZ domain containing 3
chr1	113948775	113949139	365	*	CK6___lt__120_BAM_filter_on_data_707_peak_3066d	189	.	10.5365	22.3239	18.9102	705	Intron (uc001edh.3/260425, intron 1 of 21)	1	113933475	114228545	295071	1	260425	uc010owm.2	15300	ENSG00000081026	MAGI3	membrane associated guanylate kinase, WW and PDZ domain containing 3
chr1	114354965	114355273	309	*	CK6___lt__120_BAM_filter_on_data_707_peak_3068a	346	.	16.3764	38.5397	34.6456	129	Promoter (<=1kb)	1	114304454	114355070	50617	2	54665	uc001edq.3	0	ENSG00000081019	RSBN1	round spermatid basic protein 1
chr1	114354965	114355273	309	*	CK6___lt__120_BAM_filter_on_data_707_peak_3068a	346	.	16.3764	38.5397	34.6456	129	Promoter (<=1kb)	1	114304454	114355070	50617	2	54665	uc001edq.3	0	ENSG00000081019	RSBN1	round spermatid basic protein 1
chr1	114354965	114355273	309	*	CK6___lt__120_BAM_filter_on_data_707_peak_3068b	331	.	15.9085	37.051	33.1957	238	Promoter (<=1kb)	1	114304454	114355070	50617	2	54665	uc001edq.3	0	ENSG00000081019	RSBN1	round spermatid basic protein 1
chr1	114354965	114355273	309	*	CK6___lt__120_BAM_filter_on_data_707_peak_3068b	331	.	15.9085	37.051	33.1957	238	Promoter (<=1kb)	1	114304454	114355070	50617	2	54665	uc001edq.3	0	ENSG00000081019	RSBN1	round spermatid basic protein 1
chr1	114447505	114447884	380	*	CK6___lt__120_BAM_filter_on_data_707_peak_3069a	143	.	9.25844	17.5748	14.3367	175	Promoter (<=1kb)	1	114437371	114447525	10155	2	10717	uc001eeb.3	0	ENSG00000134262	AP4B1	adaptor related protein complex 4 beta 1 subunit
chr1	114447505	114447884	380	*	CK6___lt__120_BAM_filter_on_data_707_peak_3069b	155	.	9.72136	18.8336	15.5472	339	Promoter (<=1kb)	1	114437371	114447525	10155	2	10717	uc001eeb.3	0	ENSG00000134262	AP4B1	adaptor related protein complex 4 beta 1 subunit
chr1	114673506	114673712	207	*	CK6___lt__120_BAM_filter_on_data_707_peak_3078	90	.	7.76894	12.0915	9.09739	113	Intron (uc021orz.1/148281, intron 3 of 7)	1	114631914	114695062	63149	2	148281	uc021orz.1	21350	ENSG00000134207	SYT6	synaptotagmin 6
chr1	115000562	115001167	606	*	CK6___lt__120_BAM_filter_on_data_707_peak_3083a	1243	.	22.1537	129.78	124.397	298	Intron (uc010ows.2/51592, intron 2 of 18)	1	114935399	115006178	70780	2	51592	uc010ows.2	5011	ENSG00000197323	TRIM33	tripartite motif containing 33
chr1	115000562	115001167	606	*	CK6___lt__120_BAM_filter_on_data_707_peak_3083a	1243	.	22.1537	129.78	124.397	298	Intron (uc010ows.2/51592, intron 2 of 18)	1	114935399	115006178	70780	2	51592	uc010ows.2	5011	ENSG00000197323	TRIM33	tripartite motif containing 33
chr1	115000562	115001167	606	*	CK6___lt__120_BAM_filter_on_data_707_peak_3083a	1243	.	22.1537	129.78	124.397	298	Intron (uc010ows.2/51592, intron 2 of 18)	1	114935399	115006178	70780	2	51592	uc010ows.2	5011	ENSG00000197323	TRIM33	tripartite motif containing 33
chr1	115000562	115001167	606	*	CK6___lt__120_BAM_filter_on_data_707_peak_3083b	1373	.	23.7475	142.858	137.335	454	Intron (uc010ows.2/51592, intron 2 of 18)	1	114935399	115006178	70780	2	51592	uc010ows.2	5011	ENSG00000197323	TRIM33	tripartite motif containing 33
chr1	115000562	115001167	606	*	CK6___lt__120_BAM_filter_on_data_707_peak_3083b	1373	.	23.7475	142.858	137.335	454	Intron (uc010ows.2/51592, intron 2 of 18)	1	114935399	115006178	70780	2	51592	uc010ows.2	5011	ENSG00000197323	TRIM33	tripartite motif containing 33
chr1	115000562	115001167	606	*	CK6___lt__120_BAM_filter_on_data_707_peak_3083b	1373	.	23.7475	142.858	137.335	454	Intron (uc010ows.2/51592, intron 2 of 18)	1	114935399	115006178	70780	2	51592	uc010ows.2	5011	ENSG00000197323	TRIM33	tripartite motif containing 33
chr1	115044782	115044993	212	*	CK6___lt__120_BAM_filter_on_data_707_peak_3085	128	.	9.56261	16.0256	12.8505	237	Intron (uc001eew.3/51592, intron 1 of 19)	1	114935399	115053781	118383	2	51592	uc001eew.3	8788	ENSG00000197323	TRIM33	tripartite motif containing 33
chr1	115212654	115212848	195	*	CK6___lt__120_BAM_filter_on_data_707_peak_3090	147	.	10.6117	18.0371	14.7811	154	Promoter (<=1kb)	1	115127196	115212732	85537	2	163259	uc001efc.1	0	ENSG00000175984	DENND2C	DENN domain containing 2C
chr1	115259427	115259670	244	*	CK6___lt__120_BAM_filter_on_data_707_peak_3091	246	.	13.7132	28.2202	24.6143	79	Promoter (<=1kb)	1	115247085	115259515	12431	2	4893	uc009wgu.3	0	ENSG00000213281	NRAS	NRAS proto-oncogene, GTPase
chr1	115300584	115300805	222	*	CK6___lt__120_BAM_filter_on_data_707_peak_3093	131	.	9.30453	16.2917	13.1062	72	Promoter (<=1kb)	1	115259534	115300671	41138	2	7812	uc001efi.3	0	ENSG00000009307	CSDE1	cold shock domain containing E1
chr1	115843293	115843612	320	*	CK6___lt__120_BAM_filter_on_data_707_peak_3102	436	.	16.5614	47.7705	43.651	163	Intron (uc001efu.1/4803, intron 1 of 2)	1	115828537	115880857	52321	2	4803	uc001efu.1	37245	ENSG00000134259	NGF	nerve growth factor
chr1	116199533	116199700	168	*	CK6___lt__120_BAM_filter_on_data_707_peak_3119	258	.	14.7997	29.5193	25.8755	87	Intron (uc001efv.1/81839, intron 2 of 7)	1	116185250	116240845	55596	1	81839	uc021ose.1	14283	ENSG00000173218	VANGL1	VANGL planar cell polarity protein 1
chr1	116213539	116213749	211	*	CK6___lt__120_BAM_filter_on_data_707_peak_3120	164	.	10.8779	19.8036	16.4806	178	Intron (uc001efv.1/81839, intron 4 of 7)	1	116185250	116240845	55596	1	81839	uc021ose.1	28289	ENSG00000173218	VANGL1	VANGL planar cell polarity protein 1
chr1	116223024	116223164	141	*	CK6___lt__120_BAM_filter_on_data_707_peak_3121b	142	.	9.99583	17.464	14.2303	245	Intron (uc001efv.1/81839, intron 4 of 7)	1	116185250	116240845	55596	1	81839	uc021ose.1	37774	ENSG00000173218	VANGL1	VANGL planar cell polarity protein 1
chr1	116270541	116270926	386	*	CK6___lt__120_BAM_filter_on_data_707_peak_3122a	1082	.	27.2349	113.458	108.255	137	Intron (uc001efx.4/845, intron 5 of 10)	1	116242626	116311426	68801	2	845	uc001efx.4	40500	ENSG00000118729	CASQ2	calsequestrin 2
chr1	116270541	116270926	386	*	CK6___lt__120_BAM_filter_on_data_707_peak_3122a	1082	.	27.2349	113.458	108.255	137	Intron (uc001efx.4/845, intron 5 of 10)	1	116242626	116311426	68801	2	845	uc001efx.4	40500	ENSG00000118729	CASQ2	calsequestrin 2
chr1	116270541	116270926	386	*	CK6___lt__120_BAM_filter_on_data_707_peak_3122b	312	.	11.7924	35.076	31.2741	305	Intron (uc001efx.4/845, intron 5 of 10)	1	116242626	116311426	68801	2	845	uc001efx.4	40500	ENSG00000118729	CASQ2	calsequestrin 2
chr1	116270541	116270926	386	*	CK6___lt__120_BAM_filter_on_data_707_peak_3122b	312	.	11.7924	35.076	31.2741	305	Intron (uc001efx.4/845, intron 5 of 10)	1	116242626	116311426	68801	2	845	uc001efx.4	40500	ENSG00000118729	CASQ2	calsequestrin 2
chr1	116291262	116291458	197	*	CK6___lt__120_BAM_filter_on_data_707_peak_3123	203	.	12.6906	23.8419	20.3758	119	Intron (uc001efx.4/845, intron 1 of 10)	1	116242626	116311426	68801	2	845	uc001efx.4	19968	ENSG00000118729	CASQ2	calsequestrin 2
chr1	116520258	116520428	171	*	CK6___lt__120_BAM_filter_on_data_707_peak_3135	108	.	7.86967	13.9291	10.8472	51	Promoter (1-2kb)	1	116519119	116612675	93557	1	55356	uc001egb.4	1139	ENSG00000163393	SLC22A15	solute carrier family 22 member 15
chr1	116545945	116546052	108	*	CK6___lt__120_BAM_filter_on_data_707_peak_3136	158	.	10.958	19.1724	15.8727	74	Intron (uc001ega.2/55356, intron 2 of 5)	1	116519119	116612675	93557	1	55356	uc001egb.4	26826	ENSG00000163393	SLC22A15	solute carrier family 22 member 15
chr1	116551694	116551891	198	*	CK6___lt__120_BAM_filter_on_data_707_peak_3137	131	.	9.82442	16.3148	13.1278	226	Intron (uc001ega.2/55356, intron 2 of 5)	1	116519119	116612675	93557	1	55356	uc001egb.4	32575	ENSG00000163393	SLC22A15	solute carrier family 22 member 15
chr1	116958377	116958673	297	*	CK6___lt__120_BAM_filter_on_data_707_peak_3150	268	.	12.4875	30.5176	26.8444	131	Promoter (2-3kb)	1	116935487	116961244	25758	2	84852	uc009whb.2	2571	ENSG00000203865	ATP1A1-AS1	ATP1A1 antisense RNA 1
chr1	116958808	116958975	168	*	CK6___lt__120_BAM_filter_on_data_707_peak_3151	126	.	7.94658	15.8617	12.6941	93	Promoter (2-3kb)	1	116935487	116961244	25758	2	84852	uc009whb.2	2269	ENSG00000203865	ATP1A1-AS1	ATP1A1 antisense RNA 1
chr1	117113672	117113789	118	*	CK6___lt__120_BAM_filter_on_data_707_peak_3161	112	.	8.76465	14.3153	11.216	137	Promoter (<=1kb)	1	117057156	117113715	56560	2	965	uc001egm.3	0	ENSG00000116815	CD58	CD58 molecule
chr1	117129587	117129778	192	*	CK6___lt__120_BAM_filter_on_data_707_peak_3162	284	.	15.6641	32.1321	28.4123	152	Intron (uc031pnr.1/3321, intron 8 of 10)	1	117064421	117113715	49295	2	965	uc001egp.4	-15872	ENSG00000116815	CD58	CD58 molecule
chr1	117150877	117151035	159	*	CK6___lt__120_BAM_filter_on_data_707_peak_3163	91	.	7.79276	12.1088	9.11369	92	Promoter (<=1kb)	1	117127161	117150953	23793	2	3321	uc001egs.1	0	ENSG00000143061	IGSF3	immunoglobulin superfamily member 3
chr1	117185981	117186393	413	*	CK6___lt__120_BAM_filter_on_data_707_peak_3165a	277	.	13.765	31.4148	27.7157	128	Intron (uc031pnr.1/3321, intron 1 of 10)	1	117117020	117209578	92559	2	3321	uc031pnr.1	23185	ENSG00000143061	IGSF3	immunoglobulin superfamily member 3
chr1	117185981	117186393	413	*	CK6___lt__120_BAM_filter_on_data_707_peak_3165b	161	.	9.76871	19.4223	16.1134	233	Intron (uc031pnr.1/3321, intron 1 of 10)	1	117117020	117209578	92559	2	3321	uc031pnr.1	23185	ENSG00000143061	IGSF3	immunoglobulin superfamily member 3
chr1	117495279	117495602	324	*	CK6___lt__120_BAM_filter_on_data_707_peak_3178	145	.	10.3903	17.8242	14.5764	194	Intron (uc001egv.1/5738, intron 4 of 8)	1	117452689	117532972	80284	1	5738	uc001egv.1	42590	ENSG00000134247	PTGFRN	prostaglandin F2 receptor inhibitor
chr1	117514143	117514469	327	*	CK6___lt__120_BAM_filter_on_data_707_peak_3179	292	.	15.8225	32.9908	29.2463	191	Intron (uc001egv.1/5738, intron 6 of 8)	1	117544372	117579173	34802	1	9398	uc009whd.4	-29903	ENSG00000134256	CD101	CD101 molecule
chr1	117602610	117602942	333	*	CK6___lt__120_BAM_filter_on_data_707_peak_3180a	206	.	11.9694	24.1582	20.6812	117	Promoter (<=1kb)	1	117602949	117624997	22049	1	8458	uc001egx.1	-7	ENSG00000116830	TTF2	transcription termination factor 2
chr1	117602610	117602942	333	*	CK6___lt__120_BAM_filter_on_data_707_peak_3180b	166	.	10.4433	20.0285	16.6974	294	Promoter (<=1kb)	1	117602949	117624997	22049	1	8458	uc001egx.1	-7	ENSG00000116830	TTF2	transcription termination factor 2
chr1	117664368	117664577	210	*	CK6___lt__120_BAM_filter_on_data_707_peak_3183	88	.	7.71919	11.8576	8.87656	91	Promoter (<=1kb)	1	117653677	117664411	10735	2	80263	uc001egz.2	0	ENSG00000134253	TRIM45	tripartite motif containing 45
chr1	117693606	117693766	161	*	CK6___lt__120_BAM_filter_on_data_707_peak_3184	106	.	8.40211	13.6792	10.6086	130	Intron (uc021osn.1/79679, intron 4 of 5)	1	117653677	117664411	10735	2	80263	uc009whe.2	-29195	ENSG00000134253	TRIM45	tripartite motif containing 45
chr1	117714465	117714978	514	*	CK6___lt__120_BAM_filter_on_data_707_peak_3185	1489	.	23.8349	154.57	148.914	244	Intron (uc021osn.1/79679, intron 1 of 5)	1	117686209	117746458	60250	2	79679	uc021osn.1	31480	ENSG00000134258	VTCN1	V-set domain containing T-cell activation inhibitor 1
chr1	117714465	117714978	514	*	CK6___lt__120_BAM_filter_on_data_707_peak_3185	1489	.	23.8349	154.57	148.914	244	Intron (uc021osn.1/79679, intron 1 of 5)	1	117686209	117746458	60250	2	79679	uc021osn.1	31480	ENSG00000134258	VTCN1	V-set domain containing T-cell activation inhibitor 1
chr1	117714465	117714978	514	*	CK6___lt__120_BAM_filter_on_data_707_peak_3185	1489	.	23.8349	154.57	148.914	244	Intron (uc021osn.1/79679, intron 1 of 5)	1	117686209	117746458	60250	2	79679	uc021osn.1	31480	ENSG00000134258	VTCN1	V-set domain containing T-cell activation inhibitor 1
chr1	117721514	117721684	171	*	CK6___lt__120_BAM_filter_on_data_707_peak_3186	398	.	16.9516	43.8987	39.8691	83	Intron (uc021osn.1/79679, intron 1 of 5)	1	117686209	117746458	60250	2	79679	uc021osn.1	24774	ENSG00000134258	VTCN1	V-set domain containing T-cell activation inhibitor 1
chr1	117920211	117920523	313	*	CK6___lt__120_BAM_filter_on_data_707_peak_3196	201	.	11.9499	23.5789	20.1219	167	Intron (uc009whg.1/10905, intron 1 of 8)	1	117910085	118068320	158236	1	10905	uc001ehd.1	10126	ENSG00000198162	MAN1A2	mannosidase alpha class 1A member 2
chr1	118148410	118148689	280	*	CK6___lt__120_BAM_filter_on_data_707_peak_3202	649	.	24.0815	69.453	64.9078	152	Promoter (<=1kb)	1	118148604	118171011	22408	1	54855	uc001ehe.3	0	ENSG00000183508	FAM46C	family with sequence similarity 46 member C
chr1	118472225	118472375	151	*	CK6___lt__120_BAM_filter_on_data_707_peak_3211	121	.	9.16013	15.3082	12.1645	75	Promoter (<=1kb)	1	118472372	118484470	12099	1	10885	uc001ehh.2	0	ENSG00000065183	WDR3	WD repeat domain 3
chr1	118494993	118495341	349	*	CK6___lt__120_BAM_filter_on_data_707_peak_3212	1449	.	31.0861	150.556	144.953	151	Exon (uc010oxe.1/10885, exon 18 of 27)	1	118472372	118503049	30678	1	10885	uc010oxe.1	22621	ENSG00000065183	WDR3	WD repeat domain 3
chr1	118640191	118640475	285	*	CK6___lt__120_BAM_filter_on_data_707_peak_3214a	121	.	7.3364	15.2628	12.1213	135	Exon (uc001ehk.2/200162, exon 7 of 49)	1	118584426	118623942	39517	2	200162	uc021oss.1	-16249	ENSG00000155761	SPAG17	sperm associated antigen 17
chr1	118640191	118640475	285	*	CK6___lt__120_BAM_filter_on_data_707_peak_3214b	141	.	8.00335	17.4065	14.1757	305	Exon (uc001ehk.2/200162, exon 7 of 49)	1	118584426	118623942	39517	2	200162	uc021oss.1	-16249	ENSG00000155761	SPAG17	sperm associated antigen 17
chr1	118644116	118644275	160	*	CK6___lt__120_BAM_filter_on_data_707_peak_3215	197	.	9.74537	23.1987	19.7548	92	Intron (uc001ehk.2/200162, intron 5 of 48)	1	118584426	118623942	39517	2	200162	uc021oss.1	-20174	ENSG00000155761	SPAG17	sperm associated antigen 17
chr1	119490636	119490881	246	*	CK6___lt__120_BAM_filter_on_data_707_peak_3230	202	.	12.3121	23.6676	20.2076	79	Intron (uc001ehl.1/6913, intron 1 of 7)	1	119425666	119532179	106514	2	6913	uc001ehl.1	41298	ENSG00000092607	TBX15	T-box 15
chr1	119682946	119683442	497	*	CK6___lt__120_BAM_filter_on_data_707_peak_3237a	106	.	7.51354	13.7734	10.6987	192	Promoter (<=1kb)	1	119573839	119682973	109135	2	10352	uc010oxf.2	0	ENSG00000116874	WARS2	tryptophanyl tRNA synthetase 2, mitochondrial
chr1	119682946	119683442	497	*	CK6___lt__120_BAM_filter_on_data_707_peak_3237b	276	.	13.3574	31.3745	27.6762	383	Promoter (<=1kb)	1	119573839	119682973	109135	2	10352	uc010oxf.2	0	ENSG00000116874	WARS2	tryptophanyl tRNA synthetase 2, mitochondrial
chr1	119981062	119981346	285	*	CK6___lt__120_BAM_filter_on_data_707_peak_3248	190	.	11.9055	22.4811	19.062	202	Intron (uc001ehu.3/3284, intron 3 of 3)	1	119957743	119989122	31380	1	3284	uc001ehu.3	23319	ENSG00000203859	HSD3B2	hydroxy-delta-5-steroid dehydrogenase, 3 beta- and steroid delta-isomerase 2
chr1	120138100	120138567	468	*	CK6___lt__120_BAM_filter_on_data_707_peak_3258b	273	.	12.4075	31.0227	27.3354	354	Downstream (1-2kb)	1	120140325	120141914	1590	2	644242	uc021osv.1	3347	ENSG00000260941	LINC00622	long intergenic non-protein coding RNA 622
chr1	120138100	120138567	468	*	CK6___lt__120_BAM_filter_on_data_707_peak_3258b	273	.	12.4075	31.0227	27.3354	354	Downstream (1-2kb)	1	120140325	120141914	1590	2	644242	uc021osv.1	3347	ENSG00000260941	LINC00622	long intergenic non-protein coding RNA 622
chr1	120138100	120138567	468	*	CK6___lt__120_BAM_filter_on_data_707_peak_3258c	363	.	14.9306	40.3402	36.3999	474	Downstream (1-2kb)	1	120140325	120141914	1590	2	644242	uc021osv.1	3347	ENSG00000260941	LINC00622	long intergenic non-protein coding RNA 622
chr1	120138100	120138567	468	*	CK6___lt__120_BAM_filter_on_data_707_peak_3258c	363	.	14.9306	40.3402	36.3999	474	Downstream (1-2kb)	1	120140325	120141914	1590	2	644242	uc021osv.1	3347	ENSG00000260941	LINC00622	long intergenic non-protein coding RNA 622
chr1	120174227	120174645	419	*	CK6___lt__120_BAM_filter_on_data_707_peak_3261a	100	.	5.59398	13.1301	10.0867	63	Intron (uc001ehy.1/90874, intron 1 of 2)	1	120162000	120190390	28391	2	90874	uc001ehy.1	15745	ENSG00000143067	ZNF697	zinc finger protein 697
chr1	120174227	120174645	419	*	CK6___lt__120_BAM_filter_on_data_707_peak_3261a	100	.	5.59398	13.1301	10.0867	63	Intron (uc001ehy.1/90874, intron 1 of 2)	1	120162000	120190390	28391	2	90874	uc001ehy.1	15745	ENSG00000143067	ZNF697	zinc finger protein 697
chr1	120178512	120179033	522	*	CK6___lt__120_BAM_filter_on_data_707_peak_3262a	107	.	5.72938	13.8138	10.7371	105	Intron (uc001ehy.1/90874, intron 1 of 2)	1	120162000	120190390	28391	2	90874	uc001ehy.1	11357	ENSG00000143067	ZNF697	zinc finger protein 697
chr1	120178512	120179033	522	*	CK6___lt__120_BAM_filter_on_data_707_peak_3262a	107	.	5.72938	13.8138	10.7371	105	Intron (uc001ehy.1/90874, intron 1 of 2)	1	120162000	120190390	28391	2	90874	uc001ehy.1	11357	ENSG00000143067	ZNF697	zinc finger protein 697
chr1	120178512	120179033	522	*	CK6___lt__120_BAM_filter_on_data_707_peak_3262a	107	.	5.72938	13.8138	10.7371	105	Intron (uc001ehy.1/90874, intron 1 of 2)	1	120162000	120190390	28391	2	90874	uc001ehy.1	11357	ENSG00000143067	ZNF697	zinc finger protein 697
chr1	120178512	120179033	522	*	CK6___lt__120_BAM_filter_on_data_707_peak_3262b	185	.	7.54084	21.9051	18.5058	220	Intron (uc001ehy.1/90874, intron 1 of 2)	1	120162000	120190390	28391	2	90874	uc001ehy.1	11357	ENSG00000143067	ZNF697	zinc finger protein 697
chr1	120178512	120179033	522	*	CK6___lt__120_BAM_filter_on_data_707_peak_3262b	185	.	7.54084	21.9051	18.5058	220	Intron (uc001ehy.1/90874, intron 1 of 2)	1	120162000	120190390	28391	2	90874	uc001ehy.1	11357	ENSG00000143067	ZNF697	zinc finger protein 697
chr1	120178512	120179033	522	*	CK6___lt__120_BAM_filter_on_data_707_peak_3262b	185	.	7.54084	21.9051	18.5058	220	Intron (uc001ehy.1/90874, intron 1 of 2)	1	120162000	120190390	28391	2	90874	uc001ehy.1	11357	ENSG00000143067	ZNF697	zinc finger protein 697
chr1	120178512	120179033	522	*	CK6___lt__120_BAM_filter_on_data_707_peak_3262c	153	.	6.72797	18.607	15.3289	314	Intron (uc001ehy.1/90874, intron 1 of 2)	1	120162000	120190390	28391	2	90874	uc001ehy.1	11357	ENSG00000143067	ZNF697	zinc finger protein 697
chr1	120178512	120179033	522	*	CK6___lt__120_BAM_filter_on_data_707_peak_3262c	153	.	6.72797	18.607	15.3289	314	Intron (uc001ehy.1/90874, intron 1 of 2)	1	120162000	120190390	28391	2	90874	uc001ehy.1	11357	ENSG00000143067	ZNF697	zinc finger protein 697
chr1	120178512	120179033	522	*	CK6___lt__120_BAM_filter_on_data_707_peak_3262c	153	.	6.72797	18.607	15.3289	314	Intron (uc001ehy.1/90874, intron 1 of 2)	1	120162000	120190390	28391	2	90874	uc001ehy.1	11357	ENSG00000143067	ZNF697	zinc finger protein 697
chr1	120188658	120188922	265	*	CK6___lt__120_BAM_filter_on_data_707_peak_3264	313	.	10.8953	35.1058	31.3034	99	Promoter (1-2kb)	1	120162000	120190390	28391	2	90874	uc001ehy.1	1468	ENSG00000143067	ZNF697	zinc finger protein 697
chr1	120190775	120191065	291	*	CK6___lt__120_BAM_filter_on_data_707_peak_3265	354	.	12.285	39.4098	35.4928	195	Promoter (<=1kb)	1	120162000	120190390	28391	2	90874	uc001ehy.1	-385	ENSG00000143067	ZNF697	zinc finger protein 697
chr1	120254480	120254598	119	*	CK6___lt__120_BAM_filter_on_data_707_peak_3271	112	.	8.76465	14.3153	11.216	56	Promoter (<=1kb)	1	120254419	120286849	32431	1	26227	uc009whm.3	61	ENSG00000092621	PHGDH	phosphoglycerate dehydrogenase
chr1	120275486	120275697	212	*	CK6___lt__120_BAM_filter_on_data_707_peak_3272	631	.	19.7532	67.6454	63.1324	144	Intron (uc009whl.3/26227, intron 6 of 6)	1	120262250	120286849	24600	1	26227	uc001eib.3	13236	ENSG00000092621	PHGDH	phosphoglycerate dehydrogenase
chr1	120377103	120377348	246	*	CK6___lt__120_BAM_filter_on_data_707_peak_3275a	193	.	11.7819	22.7713	19.3421	83	Downstream (<1kb)	1	120377388	120387503	10116	2	343505	uc010oxk.3	10155	NA	NBPF7	NBPF member 7
chr1	120377103	120377348	246	*	CK6___lt__120_BAM_filter_on_data_707_peak_3275b	235	.	13.4298	27.1684	23.5953	184	Downstream (<1kb)	1	120377388	120387503	10116	2	343505	uc010oxk.3	10155	NA	NBPF7	NBPF member 7
chr1	120543938	120544143	206	*	CK6___lt__120_BAM_filter_on_data_707_peak_3280	355	.	17.7274	39.4378	35.5196	88	Intron (uc001eik.3/4853, intron 3 of 33)	1	120492743	120594328	101586	2	4853	uc021osy.1	50185	ENSG00000134250	NOTCH2	notch 2
chr1	120579505	120579886	382	*	CK6___lt__120_BAM_filter_on_data_707_peak_3282a	593	.	19.0982	63.827	59.3812	141	Intron (uc001eik.3/4853, intron 1 of 33)	1	120492743	120594328	101586	2	4853	uc021osy.1	14442	ENSG00000134250	NOTCH2	notch 2
chr1	120579505	120579886	382	*	CK6___lt__120_BAM_filter_on_data_707_peak_3282a	593	.	19.0982	63.827	59.3812	141	Intron (uc001eik.3/4853, intron 1 of 33)	1	120492743	120594328	101586	2	4853	uc021osy.1	14442	ENSG00000134250	NOTCH2	notch 2
chr1	120579505	120579886	382	*	CK6___lt__120_BAM_filter_on_data_707_peak_3282b	122	.	7.17514	15.4279	12.279	334	Intron (uc001eik.3/4853, intron 1 of 33)	1	120492743	120594328	101586	2	4853	uc021osy.1	14442	ENSG00000134250	NOTCH2	notch 2
chr1	120579505	120579886	382	*	CK6___lt__120_BAM_filter_on_data_707_peak_3282b	122	.	7.17514	15.4279	12.279	334	Intron (uc001eik.3/4853, intron 1 of 33)	1	120492743	120594328	101586	2	4853	uc021osy.1	14442	ENSG00000134250	NOTCH2	notch 2
chr1	120613980	120614382	403	*	CK6___lt__120_BAM_filter_on_data_707_peak_3286	516	.	15.9731	55.9012	51.6056	332	Promoter (1-2kb)	1	120492743	120612317	119575	2	4853	uc001eim.4	-1663	ENSG00000134250	NOTCH2	notch 2
chr1	120838336	120839005	670	*	CK6___lt__120_BAM_filter_on_data_707_peak_3294a	421	.	12.0489	46.2803	42.1957	189	Promoter (<=1kb)	1	120839005	120855681	16677	1	653820	uc009whp.3	0	ENSG00000188610	FAM72B	family with sequence similarity 72 member B
chr1	120838336	120839005	670	*	CK6___lt__120_BAM_filter_on_data_707_peak_3294a	421	.	12.0489	46.2803	42.1957	189	Promoter (<=1kb)	1	120839005	120855681	16677	1	653820	uc009whp.3	0	ENSG00000188610	FAM72B	family with sequence similarity 72 member B
chr1	120838336	120839005	670	*	CK6___lt__120_BAM_filter_on_data_707_peak_3294b	493	.	13.3431	53.6458	49.3946	351	Promoter (<=1kb)	1	120839005	120855681	16677	1	653820	uc009whp.3	0	ENSG00000188610	FAM72B	family with sequence similarity 72 member B
chr1	120838336	120839005	670	*	CK6___lt__120_BAM_filter_on_data_707_peak_3294b	493	.	13.3431	53.6458	49.3946	351	Promoter (<=1kb)	1	120839005	120855681	16677	1	653820	uc009whp.3	0	ENSG00000188610	FAM72B	family with sequence similarity 72 member B
chr1	120838336	120839005	670	*	CK6___lt__120_BAM_filter_on_data_707_peak_3294c	518	.	13.7601	56.1203	51.8201	481	Promoter (<=1kb)	1	120839005	120855681	16677	1	653820	uc009whp.3	0	ENSG00000188610	FAM72B	family with sequence similarity 72 member B
chr1	120838336	120839005	670	*	CK6___lt__120_BAM_filter_on_data_707_peak_3294c	518	.	13.7601	56.1203	51.8201	481	Promoter (<=1kb)	1	120839005	120855681	16677	1	653820	uc009whp.3	0	ENSG00000188610	FAM72B	family with sequence similarity 72 member B
chr1	120905779	120905963	185	*	CK6___lt__120_BAM_filter_on_data_707_peak_3296	210	.	11.4863	24.492	21.0042	90	Promoter (<=1kb)	1	120906034	120914842	8809	1	337875	uc001eio.2	-71	NA	HIST2H2BA	histone cluster 2 H2B family member a (pseudogene)
chr1	121107689	121107912	224	*	CK6___lt__120_BAM_filter_on_data_707_peak_3300	294	.	10.0692	33.2407	29.4896	79	Promoter (<=1kb)	1	121107152	121129827	22676	1	100996712	uc031pnu.1	537	NA	SRGAP2D	SLIT-ROBO Rho GTPase activating protein 2D (pseudogene)
chr1	121257924	121258160	237	*	CK6___lt__120_BAM_filter_on_data_707_peak_3307a	166	.	8.57666	19.97	16.6411	77	Promoter (2-3kb)	1	121260910	121313686	52777	1	647121	uc001eiu.1	-2750	ENSG00000231752	EMBP1	embigin pseudogene 1
chr1	121258539	121258816	278	*	CK6___lt__120_BAM_filter_on_data_707_peak_3308a	113	.	7.39146	14.4516	11.3463	222	Promoter (2-3kb)	1	121260910	121313686	52777	1	647121	uc001eiu.1	-2094	ENSG00000231752	EMBP1	embigin pseudogene 1
chr1	142618566	142618844	279	*	CK6___lt__120_BAM_filter_on_data_707_peak_3323	211	.	11.9217	24.6431	21.1505	279	Exon (uc001eiw.1/uc001eiw.1, exon 1 of 8)	1	142697421	142713605	16185	2	100874392	uc031pnv.1	94761	NA	ANKRD20A12P	ankyrin repeat domain 20 family member A12, pseudogene
chr1	142890976	142891070	95	*	CK6___lt__120_BAM_filter_on_data_707_peak_3325	123	.	9.46605	15.5075	12.355	67	Intron (uc001eiw.1/uc001eiw.1, intron 1 of 7)	1	142697421	142713605	16185	2	100874392	uc031pnv.1	-177371	NA	ANKRD20A12P	ankyrin repeat domain 20 family member A12, pseudogene
chr1	142964515	142964655	141	*	CK6___lt__120_BAM_filter_on_data_707_peak_3328	81	.	7.31216	11.0511	8.112	56	Intron (uc001eiw.1/uc001eiw.1, intron 1 of 7)	1	142697421	142713605	16185	2	100874392	uc031pnv.1	-250910	NA	ANKRD20A12P	ankyrin repeat domain 20 family member A12, pseudogene
chr1	143440970	143441248	279	*	CK6___lt__120_BAM_filter_on_data_707_peak_3333	200	.	12.7501	23.5249	20.0696	174	Intron (uc001ejn.1/uc001ejn.1, intron 2 of 2)	1	143687130	143705973	18844	1	100130000	uc009whw.2	-245882	NA	NA	NA
chr1	143440970	143441248	279	*	CK6___lt__120_BAM_filter_on_data_707_peak_3333	200	.	12.7501	23.5249	20.0696	174	Intron (uc001ejn.1/uc001ejn.1, intron 2 of 2)	1	143687130	143705973	18844	1	100130000	uc009whw.2	-245882	NA	NA	NA
chr1	143702331	143702568	238	*	CK6___lt__120_BAM_filter_on_data_707_peak_3341	99	.	8.13179	13.038	9.9991	191	Exon (uc031pnw.1/uc031pnw.1, exon 1 of 1)	1	143687130	143714180	27051	1	100130000	uc001ejq.3	15201	NA	NA	NA
chr1	143913171	143913815	645	*	CK6___lt__120_BAM_filter_on_data_707_peak_3343a	534	.	14.4342	57.7677	53.4341	173	Promoter (<=1kb)	1	143896452	143913143	16692	2	728833	uc010evy.1	-28	ENSG00000215784	FAM72D	family with sequence similarity 72 member D
chr1	143913171	143913815	645	*	CK6___lt__120_BAM_filter_on_data_707_peak_3343a	534	.	14.4342	57.7677	53.4341	173	Promoter (<=1kb)	1	143896452	143913143	16692	2	728833	uc010evy.1	-28	ENSG00000215784	FAM72D	family with sequence similarity 72 member D
chr1	143913171	143913815	645	*	CK6___lt__120_BAM_filter_on_data_707_peak_3343a	534	.	14.4342	57.7677	53.4341	173	Promoter (<=1kb)	1	143896452	143913143	16692	2	728833	uc010evy.1	-28	ENSG00000215784	FAM72D	family with sequence similarity 72 member D
chr1	143913171	143913815	645	*	CK6___lt__120_BAM_filter_on_data_707_peak_3343b	584	.	15.2898	62.8533	58.4252	316	Promoter (<=1kb)	1	143896452	143913143	16692	2	728833	uc010evy.1	-28	ENSG00000215784	FAM72D	family with sequence similarity 72 member D
chr1	143913171	143913815	645	*	CK6___lt__120_BAM_filter_on_data_707_peak_3343b	584	.	15.2898	62.8533	58.4252	316	Promoter (<=1kb)	1	143896452	143913143	16692	2	728833	uc010evy.1	-28	ENSG00000215784	FAM72D	family with sequence similarity 72 member D
chr1	143913171	143913815	645	*	CK6___lt__120_BAM_filter_on_data_707_peak_3343b	584	.	15.2898	62.8533	58.4252	316	Promoter (<=1kb)	1	143896452	143913143	16692	2	728833	uc010evy.1	-28	ENSG00000215784	FAM72D	family with sequence similarity 72 member D
chr1	143913171	143913815	645	*	CK6___lt__120_BAM_filter_on_data_707_peak_3343c	355	.	11.1537	39.5099	35.5895	479	Promoter (<=1kb)	1	143896452	143913143	16692	2	728833	uc010evy.1	-28	ENSG00000215784	FAM72D	family with sequence similarity 72 member D
chr1	143913171	143913815	645	*	CK6___lt__120_BAM_filter_on_data_707_peak_3343c	355	.	11.1537	39.5099	35.5895	479	Promoter (<=1kb)	1	143896452	143913143	16692	2	728833	uc010evy.1	-28	ENSG00000215784	FAM72D	family with sequence similarity 72 member D
chr1	143913171	143913815	645	*	CK6___lt__120_BAM_filter_on_data_707_peak_3343c	355	.	11.1537	39.5099	35.5895	479	Promoter (<=1kb)	1	143896452	143913143	16692	2	728833	uc010evy.1	-28	ENSG00000215784	FAM72D	family with sequence similarity 72 member D
chr1	143934640	143935120	481	*	CK6___lt__120_BAM_filter_on_data_707_peak_3344	447	.	14.7855	48.8754	44.7312	318	Intron (uc010oxm.1/uc010oxm.1, intron 1 of 3)	1	143896452	143913143	16692	2	728833	uc010evy.1	-21497	ENSG00000215784	FAM72D	family with sequence similarity 72 member D
chr1	144010155	144010311	157	*	CK6___lt__120_BAM_filter_on_data_707_peak_3349	109	.	8.3946	13.9979	10.9128	109	Intron (uc010oxm.1/uc010oxm.1, intron 1 of 3)	1	143896452	143913143	16692	2	728833	uc010evy.1	-97012	ENSG00000215784	FAM72D	family with sequence similarity 72 member D
chr1	144027547	144027944	398	*	CK6___lt__120_BAM_filter_on_data_707_peak_3350a	172	.	10.4911	20.6214	17.2684	122	Intron (uc010oxm.1/uc010oxm.1, intron 2 of 3)	1	143896452	143913143	16692	2	728833	uc010evy.1	-114404	ENSG00000215784	FAM72D	family with sequence similarity 72 member D
chr1	144027547	144027944	398	*	CK6___lt__120_BAM_filter_on_data_707_peak_3350a	172	.	10.4911	20.6214	17.2684	122	Intron (uc010oxm.1/uc010oxm.1, intron 2 of 3)	1	143896452	143913143	16692	2	728833	uc010evy.1	-114404	ENSG00000215784	FAM72D	family with sequence similarity 72 member D
chr1	144027547	144027944	398	*	CK6___lt__120_BAM_filter_on_data_707_peak_3350b	280	.	14.3453	31.7441	28.0353	243	Intron (uc010oxm.1/uc010oxm.1, intron 2 of 3)	1	143896452	143913143	16692	2	728833	uc010evy.1	-114404	ENSG00000215784	FAM72D	family with sequence similarity 72 member D
chr1	144027547	144027944	398	*	CK6___lt__120_BAM_filter_on_data_707_peak_3350b	280	.	14.3453	31.7441	28.0353	243	Intron (uc010oxm.1/uc010oxm.1, intron 2 of 3)	1	143896452	143913143	16692	2	728833	uc010evy.1	-114404	ENSG00000215784	FAM72D	family with sequence similarity 72 member D
chr1	144036909	144037093	185	*	CK6___lt__120_BAM_filter_on_data_707_peak_3351	95	.	8.04337	12.5284	9.51302	171	Intron (uc010oxm.1/uc010oxm.1, intron 2 of 3)	1	144146811	146467744	2320934	1	100288142	uc021ott.2	-109718	ENSG00000162825	NBPF20	NBPF member 20
chr1	144090762	144091321	560	*	CK6___lt__120_BAM_filter_on_data_707_peak_3353	210	.	7.58555	24.4898	21.0023	303	Intron (uc010oxm.1/uc010oxm.1, intron 3 of 3)	1	144146811	146467744	2320934	1	100288142	uc021ott.2	-55490	ENSG00000162825	NBPF20	NBPF member 20
chr1	144287321	144287641	321	*	CK6___lt__120_BAM_filter_on_data_707_peak_3355	122	.	9.37117	15.4289	12.2794	157	Intron (uc010oxn.2/728841, intron 15 of 18)	1	144300512	144340773	40262	2	728855	uc001ekr.4	53132	NA	LINC00623	long intergenic non-protein coding RNA 623
chr1	144302640	144302920	281	*	CK6___lt__120_BAM_filter_on_data_707_peak_3356	161	.	11.2279	19.4397	16.1302	194	Intron (uc010oxn.2/728841, intron 15 of 18)	1	144300512	144340773	40262	2	728855	uc001ekr.4	37853	NA	LINC00623	long intergenic non-protein coding RNA 623
chr1	144393946	144394280	335	*	CK6___lt__120_BAM_filter_on_data_707_peak_3357a	313	.	15.9634	35.1165	31.3135	68	Intron (uc010oxn.2/728841, intron 15 of 18)	1	144363462	144364246	785	2	653505	uc001ekw.3	-29700	ENSG00000263353	PPIAL4A	peptidylprolyl isomerase A like 4A
chr1	144393946	144394280	335	*	CK6___lt__120_BAM_filter_on_data_707_peak_3357a	313	.	15.9634	35.1165	31.3135	68	Intron (uc010oxn.2/728841, intron 15 of 18)	1	144363462	144364246	785	2	653505	uc001ekw.3	-29700	ENSG00000263353	PPIAL4A	peptidylprolyl isomerase A like 4A
chr1	144393946	144394280	335	*	CK6___lt__120_BAM_filter_on_data_707_peak_3357b	87	.	7.20929	11.6851	8.71323	264	Intron (uc010oxn.2/728841, intron 15 of 18)	1	144363462	144364246	785	2	653505	uc001ekw.3	-29700	ENSG00000263353	PPIAL4A	peptidylprolyl isomerase A like 4A
chr1	144393946	144394280	335	*	CK6___lt__120_BAM_filter_on_data_707_peak_3357b	87	.	7.20929	11.6851	8.71323	264	Intron (uc010oxn.2/728841, intron 15 of 18)	1	144363462	144364246	785	2	653505	uc001ekw.3	-29700	ENSG00000263353	PPIAL4A	peptidylprolyl isomerase A like 4A
chr1	144467532	144467826	295	*	CK6___lt__120_BAM_filter_on_data_707_peak_3359	314	.	16.7686	35.2262	31.421	134	Intron (uc010oxn.2/728841, intron 15 of 18)	1	144480745	144521009	40265	2	728875	uc001ela.4	53183	NA	NA	NA
chr1	144482932	144483114	183	*	CK6___lt__120_BAM_filter_on_data_707_peak_3360	96	.	8.11151	12.6755	9.65229	179	Intron (uc010oxn.2/728841, intron 15 of 18)	1	144480745	144521009	40265	2	728875	uc001ela.4	37895	NA	NA	NA
chr1	144534349	144534523	175	*	CK6___lt__120_BAM_filter_on_data_707_peak_3362	107	.	7.8074	13.8273	10.7503	204	Intron (uc010oxn.2/728841, intron 15 of 18)	1	144480746	144521969	41224	2	728875	uc001ekz.4	-12380	NA	NA	NA
chr1	144708933	144709140	208	*	CK6___lt__120_BAM_filter_on_data_707_peak_3367	244	.	13.6306	28.0812	24.4797	168	Intron (uc010oxn.2/728841, intron 15 of 18)	1	144676437	144680025	3589	2	653513	uc021oue.1	-28908	ENSG00000178104	LOC653513	phosphodiesterase 4D interacting protein-like
chr1	144866669	144867072	404	*	CK6___lt__120_BAM_filter_on_data_707_peak_3371	784	.	18.6834	83.2088	78.4324	182	Promoter (1-2kb)	1	144862708	144868172	5465	2	9659	uc001ema.3	1100	ENSG00000178104	PDE4DIP	phosphodiesterase 4D interacting protein
chr1	144866669	144867072	404	*	CK6___lt__120_BAM_filter_on_data_707_peak_3371	784	.	18.6834	83.2088	78.4324	182	Promoter (1-2kb)	1	144862708	144868172	5465	2	9659	uc001ema.3	1100	ENSG00000178104	PDE4DIP	phosphodiesterase 4D interacting protein
chr1	144866669	144867072	404	*	CK6___lt__120_BAM_filter_on_data_707_peak_3371	784	.	18.6834	83.2088	78.4324	182	Promoter (1-2kb)	1	144862708	144868172	5465	2	9659	uc001ema.3	1100	ENSG00000178104	PDE4DIP	phosphodiesterase 4D interacting protein
chr1	144891729	144892084	356	*	CK6___lt__120_BAM_filter_on_data_707_peak_3372	516	.	17.1322	55.8961	51.6009	176	Promoter (2-3kb)	1	144851424	144894125	42702	2	9659	uc001elv.4	2041	ENSG00000178104	PDE4DIP	phosphodiesterase 4D interacting protein
chr1	144897376	144897486	111	*	CK6___lt__120_BAM_filter_on_data_707_peak_3373	99	.	7.98904	12.9746	9.93865	63	Intron (uc021ott.2/100288142, intron 53 of 131)	1	144851424	144894125	42702	2	9659	uc001elv.4	-3251	ENSG00000178104	PDE4DIP	phosphodiesterase 4D interacting protein
chr1	144931946	144932170	225	*	CK6___lt__120_BAM_filter_on_data_707_peak_3374	159	.	10.299	19.2949	15.9907	158	Promoter (<=1kb)	1	144890591	144932032	41442	2	9659	uc001emb.1	0	ENSG00000178104	PDE4DIP	phosphodiesterase 4D interacting protein
chr1	144984209	144984344	136	*	CK6___lt__120_BAM_filter_on_data_707_peak_3377	92	.	7.88094	12.2709	9.26764	76	Intron (uc021ott.2/100288142, intron 53 of 131)	1	144676437	144995033	318597	2	653513	uc001elk.2	10689	ENSG00000178104	LOC653513	phosphodiesterase 4D interacting protein-like
chr1	144990592	144990955	364	*	CK6___lt__120_BAM_filter_on_data_707_peak_3378a	234	.	12.6673	27.0621	23.4917	126	Intron (uc021ott.2/100288142, intron 53 of 131)	1	144676437	144995033	318597	2	653513	uc001elk.2	4078	ENSG00000178104	LOC653513	phosphodiesterase 4D interacting protein-like
chr1	144990592	144990955	364	*	CK6___lt__120_BAM_filter_on_data_707_peak_3378a	234	.	12.6673	27.0621	23.4917	126	Intron (uc021ott.2/100288142, intron 53 of 131)	1	144676437	144995033	318597	2	653513	uc001elk.2	4078	ENSG00000178104	LOC653513	phosphodiesterase 4D interacting protein-like
chr1	145014643	145014776	134	*	CK6___lt__120_BAM_filter_on_data_707_peak_3379	89	.	6.67974	11.9715	8.98329	65	Intron (uc021ott.2/100288142, intron 53 of 131)	1	144951761	144997111	45351	2	9659	uc021ouj.1	-17532	ENSG00000178104	PDE4DIP	phosphodiesterase 4D interacting protein
chr1	145015206	145015415	210	*	CK6___lt__120_BAM_filter_on_data_707_peak_3380	112	.	7.62037	14.3912	11.2883	179	Intron (uc021ott.2/100288142, intron 53 of 131)	1	144951761	144997111	45351	2	9659	uc021ouj.1	-18095	ENSG00000178104	PDE4DIP	phosphodiesterase 4D interacting protein
chr1	145039847	145040040	194	*	CK6___lt__120_BAM_filter_on_data_707_peak_3382	456	.	18.1565	49.8505	45.6837	71	Promoter (<=1kb)	1	144676437	145039992	363556	2	653513	uc001elm.4	0	ENSG00000178104	LOC653513	phosphodiesterase 4D interacting protein-like
chr1	145096341	145096531	191	*	CK6___lt__120_BAM_filter_on_data_707_peak_3387	170	.	11.2097	20.3743	17.0309	101	Promoter (<=1kb)	1	145096407	145116997	20591	1	9554	uc031poa.1	0	ENSG00000265808	SEC22B	SEC22 homolog B, vesicle trafficking protein (gene/pseudogene)
chr1	145109880	145110106	227	*	CK6___lt__120_BAM_filter_on_data_707_peak_3388	81	.	6.17783	11.1285	8.18532	121	Intron (uc021ott.2/100288142, intron 53 of 131)	1	145096407	145116997	20591	1	9554	uc031poa.1	13473	ENSG00000265808	SEC22B	SEC22 homolog B, vesicle trafficking protein (gene/pseudogene)
chr1	145109880	145110106	227	*	CK6___lt__120_BAM_filter_on_data_707_peak_3388	81	.	6.17783	11.1285	8.18532	121	Intron (uc021ott.2/100288142, intron 53 of 131)	1	145096407	145116997	20591	1	9554	uc031poa.1	13473	ENSG00000265808	SEC22B	SEC22 homolog B, vesicle trafficking protein (gene/pseudogene)
chr1	145187318	145187868	551	*	CK6___lt__120_BAM_filter_on_data_707_peak_3393	276	.	13.6951	31.2967	27.601	126	Intron (uc021ott.2/100288142, intron 53 of 131)	1	145209111	145304652	95542	1	100132406	uc021ouk.1	-21243	ENSG00000271425	NBPF10	NBPF member 10
chr1	145207038	145207308	271	*	CK6___lt__120_BAM_filter_on_data_707_peak_3394	891	.	22.6722	94.139	89.1983	152	Promoter (1-2kb)	1	145209111	145304652	95542	1	100132406	uc021ouk.1	-1803	ENSG00000271425	NBPF10	NBPF member 10
chr1	145241600	145242009	410	*	CK6___lt__120_BAM_filter_on_data_707_peak_3397	804	.	23.2918	85.29	80.4809	252	Intron (uc021ott.2/100288142, intron 53 of 131)	1	145224597	145285912	61316	1	388677	uc031pob.1	17003	ENSG00000264343	NOTCH2NL	notch 2 N-terminal like
chr1	145277281	145277582	302	*	CK6___lt__120_BAM_filter_on_data_707_peak_3400	1602	.	43.1484	166.029	160.269	161	Intron (uc021ott.2/100288142, intron 53 of 131)	1	145293233	145311154	17922	1	100132406	uc001emq.1	-15651	ENSG00000271425	NBPF10	NBPF member 10
chr1	145395662	145395886	225	*	CK6___lt__120_BAM_filter_on_data_707_peak_3405	101	.	7.39762	13.1565	10.1113	93	Intron (uc021ott.2/100288142, intron 99 of 131)	1	145413191	145417545	4355	1	148738	uc001eni.2	-17305	ENSG00000168509	HFE2	hemochromatosis type 2 (juvenile)
chr1	145438307	145438461	155	*	CK6___lt__120_BAM_filter_on_data_707_peak_3409	183	.	12.142	21.7025	18.3108	128	Promoter (<=1kb)	1	145438462	145442628	4167	1	10628	uc001enn.4	-1	ENSG00000265972	TXNIP	thioredoxin interacting protein
chr1	145455410	145455573	164	*	CK6___lt__120_BAM_filter_on_data_707_peak_3411	176	.	11.9297	21.0423	17.6739	118	Intron (uc021ott.2/100288142, intron 99 of 131)	1	145456236	145470387	14152	2	84265	uc001enp.1	14814	ENSG00000121851	POLR3GL	RNA polymerase III subunit G like
chr1	145470426	145470602	177	*	CK6___lt__120_BAM_filter_on_data_707_peak_3412	89	.	7.70023	11.9257	8.93893	52	Promoter (<=1kb)	1	145470508	145475647	5140	1	284615	uc001enq.1	0	ENSG00000272031	ANKRD34A	ankyrin repeat domain 34A
chr1	145476919	145477147	229	*	CK6___lt__120_BAM_filter_on_data_707_peak_3413	130	.	9.66882	16.219	13.036	98	Promoter (<=1kb)	1	145477085	145499091	22007	1	128077	uc001enr.3	0	ENSG00000271601	LIX1L	limb and CNS expressed 1 like
chr1	145542504	145543099	596	*	CK6___lt__120_BAM_filter_on_data_707_peak_3419a	117	.	7.63454	14.8663	11.7428	118	3' UTR	1	145549209	145563099	13891	1	148741	uc010oyx.1	-6110	ENSG00000198483	ANKRD35	ankyrin repeat domain 35
chr1	145542504	145543099	596	*	CK6___lt__120_BAM_filter_on_data_707_peak_3419a	117	.	7.63454	14.8663	11.7428	118	3' UTR	1	145549209	145563099	13891	1	148741	uc010oyx.1	-6110	ENSG00000198483	ANKRD35	ankyrin repeat domain 35
chr1	145542504	145543099	596	*	CK6___lt__120_BAM_filter_on_data_707_peak_3419b	390	.	16.0325	43.0385	39.0294	477	3' UTR	1	145549209	145563099	13891	1	148741	uc010oyx.1	-6110	ENSG00000198483	ANKRD35	ankyrin repeat domain 35
chr1	145542504	145543099	596	*	CK6___lt__120_BAM_filter_on_data_707_peak_3419b	390	.	16.0325	43.0385	39.0294	477	3' UTR	1	145549209	145563099	13891	1	148741	uc010oyx.1	-6110	ENSG00000198483	ANKRD35	ankyrin repeat domain 35
chr1	145575924	145576093	170	*	CK6___lt__120_BAM_filter_on_data_707_peak_3420	170	.	11.6534	20.3611	17.0181	88	Promoter (<=1kb)	1	145575988	145586546	10559	1	10401	uc001eoc.1	0	ENSG00000131788	PIAS3	protein inhibitor of activated STAT 3
chr1	145659709	145659893	185	*	CK6___lt__120_BAM_filter_on_data_707_peak_3423	149	.	10.5713	18.1908	14.9286	83	Intron (uc021ott.2/100288142, intron 99 of 131)	1	145698953	145706827	7875	2	11126	uc010oyz.1	46934	ENSG00000117281	CD160	CD160 molecule
chr1	145679693	145679887	195	*	CK6___lt__120_BAM_filter_on_data_707_peak_3424	220	.	13.3879	25.5331	22.0113	98	Intron (uc021ott.2/100288142, intron 99 of 131)	1	145698953	145706827	7875	2	11126	uc010oyz.1	26940	ENSG00000117281	CD160	CD160 molecule
chr1	145683120	145683265	146	*	CK6___lt__120_BAM_filter_on_data_707_peak_3425	100	.	8.19755	13.0491	10.0085	128	Intron (uc021ott.2/100288142, intron 99 of 131)	1	145698953	145706827	7875	2	11126	uc010oyz.1	23562	ENSG00000117281	CD160	CD160 molecule
chr1	145759349	145759650	302	*	CK6___lt__120_BAM_filter_on_data_707_peak_3427	482	.	18.3033	52.4941	48.2683	229	Intron (uc021ott.2/100288142, intron 99 of 131)	1	145764595	145788795	24201	2	653519	uc001eop.2	29145	ENSG00000117262	GPR89A	G protein-coupled receptor 89A
chr1	145759349	145759650	302	*	CK6___lt__120_BAM_filter_on_data_707_peak_3427	482	.	18.3033	52.4941	48.2683	229	Intron (uc021ott.2/100288142, intron 99 of 131)	1	145764595	145788795	24201	2	653519	uc001eop.2	29145	ENSG00000117262	GPR89A	G protein-coupled receptor 89A
chr1	145928850	145929142	293	*	CK6___lt__120_BAM_filter_on_data_707_peak_3429	497	.	18.6769	53.9689	49.7115	79	Intron (uc021ott.2/100288142, intron 99 of 131)	1	145924388	145934507	10120	2	728939	uc010ozf.2	5365	NA	NA	NA
chr1	145928850	145929142	293	*	CK6___lt__120_BAM_filter_on_data_707_peak_3429	497	.	18.6769	53.9689	49.7115	79	Intron (uc021ott.2/100288142, intron 99 of 131)	1	145924388	145934507	10120	2	728939	uc010ozf.2	5365	NA	NA	NA
chr1	145969269	145969423	155	*	CK6___lt__120_BAM_filter_on_data_707_peak_3430	123	.	9.40668	15.5057	12.3533	84	Intron (uc021ott.2/100288142, intron 99 of 131)	1	145924388	145942619	18232	2	728939	uc001eov.1	-26650	NA	NA	NA
chr1	146159057	146159199	143	*	CK6___lt__120_BAM_filter_on_data_707_peak_3439	135	.	10.0103	16.7373	13.5335	98	Intron (uc021ott.2/100288142, intron 99 of 131)	1	146032542	146082765	50224	2	728912	uc010ozh.3	-76292	NA	NA	NA
chr1	146383922	146384053	132	*	CK6___lt__120_BAM_filter_on_data_707_peak_3443	112	.	8.82137	14.3803	11.2777	78	Intron (uc021ott.2/100288142, intron 99 of 131)	1	146373857	146467744	93888	1	149013	uc031poi.1	10065	ENSG00000268043	NBPF12	NBPF member 12
[truncated: 21,933 more rows]

## Sheet: inducedbound
MITF CutandRun target overlap with the induced DEG in ΔMITF-X6 vs. EV-SkMel28
[truncated: 2,380 more rows]

## Sheet: reducedbound
MITF CutandRun target overlap with the reduced DEG in ΔMITF-X6 vs. EV-SkMel28
[truncated: 2,352 more rows]

[truncated: 1 more sheets: boundECM]
