# Supplementary material for: MITF reprograms the extracellular matrix and focal adhesion in melanoma
Source: eLife. 2021 Jan 13;10:e63093. doi: 10.7554/eLife.63093 (PMC7857731; doi:10.7554/eLife.63093)
Supplement: Supplementary file 3. [file elife-63093-supp3.xlsx]

## Sheet: MITFChIP-seqColo829
MITF ChIP-seq Colo829
seqnames	start	end	width	strand	V4	V5	annotation	geneChr	geneStart	geneEnd	geneLength	geneStrand	geneId	transcriptId	distanceToTSS	ENSEMBL	SYMBOL	GENENAME
chr1	918948	919452	505	*	MACS_peak_1	89.4	Promoter (1-2kb)	1	910579	917473	6895	2	84808	uc001ach.2	-1475	ENSG00000187642	PERM1	PPARGC1 and ESRR induced regulator, muscle 1
chr1	1014788	1015293	506	*	MACS_peak_2	98.63	Downstream (1-2kb)	1	1007126	1009687	2562	2	401934	uc021oen.1	-5101	ENSG00000237330	RNF223	ring finger protein 223
chr1	1460609	1460908	300	*	MACS_peak_4	80.99	Exon (uc001afz.2/55210, exon 12 of 16)	1	1447910	1470067	22158	1	55210	uc001agb.2	12699	ENSG00000197785	ATAD3A	ATPase family, AAA domain containing 3A
chr1	1502360	1502966	607	*	MACS_peak_5	52.81	Intron (uc001agd.3/29101, intron 1 of 4)	1	1477053	1510262	33210	2	29101	uc001agd.3	7296	ENSG00000160075	SSU72	SSU72 homolog, RNA polymerase II CTD phosphatase
chr1	1617638	1618198	561	*	MACS_peak_6	54.39	Intron (uc001ags.1/984, intron 2 of 15)	1	1590988	1624243	33256	2	728661	uc009vkl.2	6045	ENSG00000189339	SLC35E2B	solute carrier family 35 member E2B
chr1	1655644	1656283	640	*	MACS_peak_7	67.44	Promoter (<=1kb)	1	1634170	1655791	21622	2	728642	uc009vkr.3	0	ENSG00000008128	CDK11A	cyclin dependent kinase 11A
chr1	1672209	1672837	629	*	MACS_peak_8	84.4	Intron (uc001ahh.4/728661, intron 1 of 8)	1	1592939	1677438	84500	2	728661	uc001ahh.4	4601	ENSG00000189339	SLC35E2B	solute carrier family 35 member E2B
chr1	1790727	1791032	306	*	MACS_peak_9	52.87	Intron (uc001aif.3/2782, intron 1 of 11)	1	1716725	1822526	105802	2	2782	uc001aif.3	31494	ENSG00000078369	GNB1	G protein subunit beta 1
chr1	1820916	1821287	372	*	MACS_peak_10	63.51	Promoter (1-2kb)	1	1716725	1822526	105802	2	2782	uc001aif.3	1239	ENSG00000078369	GNB1	G protein subunit beta 1
chr1	2163732	2164553	822	*	MACS_peak_11	68.81	Intron (uc001aja.4/6497, intron 1 of 6)	1	2160134	2241652	81519	1	6497	uc001aja.4	3598	ENSG00000157933	SKI	SKI proto-oncogene
chr1	2171858	2172351	494	*	MACS_peak_12	52.92	Intron (uc001aja.4/6497, intron 1 of 6)	1	2160134	2241652	81519	1	6497	uc001aja.4	11724	ENSG00000157933	SKI	SKI proto-oncogene
chr1	2319432	2319866	435	*	MACS_peak_13	97.54	5' UTR	1	2252696	2322993	70298	2	79906	uc001ajb.1	3127	ENSG00000116151	MORN1	MORN repeat containing 1
chr1	2487031	2487791	761	*	MACS_peak_14	251.98	Promoter (<=1kb)	1	2487805	2490438	2634	1	8764	uc010nzc.1	-14	ENSG00000157873	TNFRSF14	TNF receptor superfamily member 14
chr1	3387027	3387577	551	*	MACS_peak_15	51.55	Promoter (<=1kb)	1	3388171	3391021	2851	1	27237	uc009vli.1	-594	ENSG00000130762	ARHGEF16	Rho guanine nucleotide exchange factor 16
chr1	3816545	3817211	667	*	MACS_peak_16	60.29	Promoter (<=1kb)	1	3816968	3832011	15044	1	100133612	uc001alg.3	0	ENSG00000236423	LINC01134	long intergenic non-protein coding RNA 1134
chr1	5975687	5976216	530	*	MACS_peak_18	100.35	Intron (uc001alq.2/261734, intron 11 of 29)	1	5946555	5965543	18989	2	261734	uc009vlu.2	-10144	ENSG00000131697	NPHP4	nephrocystin 4
chr1	5977379	5978085	707	*	MACS_peak_19	50.66	Intron (uc001alq.2/261734, intron 11 of 29)	1	5946555	5965543	18989	2	261734	uc009vlu.2	-11836	ENSG00000131697	NPHP4	nephrocystin 4
chr1	6076231	6077124	894	*	MACS_peak_20	169.67	Intron (uc009vlv.2/8514, intron 1 of 15)	1	6086073	6158621	72549	1	8514	uc001alu.3	-8949	ENSG00000069424	KCNAB2	potassium voltage-gated channel subfamily A regulatory beta subunit 2
chr1	6086025	6086628	604	*	MACS_peak_21	77.14	Promoter (<=1kb)	1	6086073	6158621	72549	1	8514	uc001alu.3	0	ENSG00000069424	KCNAB2	potassium voltage-gated channel subfamily A regulatory beta subunit 2
chr1	6187675	6188048	374	*	MACS_peak_22	63.51	Intron (uc001alz.2/26038, intron 5 of 20)	1	6161847	6191808	29962	2	26038	uc001alz.2	3760	ENSG00000116254	CHD5	chromodomain helicase DNA binding protein 5
chr1	6333257	6333923	667	*	MACS_peak_23	77.1	Intron (uc001amq.3/11332, intron 8 of 8)	1	6307406	6321035	13630	2	387509	uc001amp.2	-12222	ENSG00000158292	GPR153	G protein-coupled receptor 153
chr1	6402084	6402507	424	*	MACS_peak_24	124.41	Intron (uc001amq.3/11332, intron 2 of 8)	1	6324332	6419004	94673	2	11332	uc001amq.3	16497	ENSG00000097021	ACOT7	acyl-CoA thioesterase 7
chr1	6419601	6420009	409	*	MACS_peak_25	123.87	Promoter (<=1kb)	1	6324332	6419004	94673	2	11332	uc001amq.3	-597	ENSG00000097021	ACOT7	acyl-CoA thioesterase 7
chr1	6427772	6428172	401	*	MACS_peak_26	70.95	Intron (uc001ams.3/11332, intron 1 of 8)	1	6324332	6420764	96433	2	11332	uc001amr.3	-7008	ENSG00000097021	ACOT7	acyl-CoA thioesterase 7
chr1	6453747	6454320	574	*	MACS_peak_27	120.32	Promoter (<=1kb)	1	6324332	6453826	129495	2	11332	uc001amt.3	0	ENSG00000097021	ACOT7	acyl-CoA thioesterase 7
chr1	6575692	6576139	448	*	MACS_peak_28	51.16	Intron (uc001anp.2/57449, intron 1 of 21)	1	6526152	6580121	53970	2	57449	uc001anp.2	3982	ENSG00000171680	PLEKHG5	pleckstrin homology and RhoGEF domain containing G5
chr1	6663292	6663977	686	*	MACS_peak_29	82.19	Promoter (<=1kb)	1	6650784	6662929	12146	2	9903	uc001aoa.3	-363	ENSG00000162413	KLHL21	kelch like family member 21
chr1	6844508	6844854	347	*	MACS_peak_30	69.1	Promoter (<=1kb)	1	6845384	6932107	86724	1	23261	uc001aoh.3	-530	ENSG00000171735	CAMTA1	calmodulin binding transcription activator 1
chr1	6844937	6845352	416	*	MACS_peak_31	78.92	Promoter (<=1kb)	1	6845384	6932107	86724	1	23261	uc001aoh.3	-32	ENSG00000171735	CAMTA1	calmodulin binding transcription activator 1
chr1	7153540	7154034	495	*	MACS_peak_32	74.33	Intron (uc001aoi.3/23261, intron 4 of 22)	1	6845384	7829766	984383	1	23261	uc001aoi.3	308156	ENSG00000171735	CAMTA1	calmodulin binding transcription activator 1
chr1	7284731	7285144	414	*	MACS_peak_33	60.17	Intron (uc001aoi.3/23261, intron 4 of 22)	1	6845384	7829766	984383	1	23261	uc001aoi.3	439347	ENSG00000171735	CAMTA1	calmodulin binding transcription activator 1
chr1	7461782	7462217	436	*	MACS_peak_34	56.43	Intron (uc001aoi.3/23261, intron 5 of 22)	1	7732054	7805082	73029	1	23261	uc010nzv.1	-269837	ENSG00000171735	CAMTA1	calmodulin binding transcription activator 1
chr1	7544840	7545271	432	*	MACS_peak_35	59.6	Intron (uc001aoi.3/23261, intron 6 of 22)	1	7732054	7805082	73029	1	23261	uc010nzv.1	-186783	ENSG00000171735	CAMTA1	calmodulin binding transcription activator 1
chr1	7634992	7635806	815	*	MACS_peak_36	148.86	Intron (uc001aoi.3/23261, intron 6 of 22)	1	7732054	7805082	73029	1	23261	uc010nzv.1	-96248	ENSG00000171735	CAMTA1	calmodulin binding transcription activator 1
chr1	7933913	7934417	505	*	MACS_peak_37	50.81	Intron (uc001aoq.3/10911, intron 1 of 7)	1	7907672	7913565	5894	2	10911	uc001aos.3	-20348	ENSG00000049247	UTS2	urotensin 2
chr1	8444462	8445006	545	*	MACS_peak_39	74.74	Intron (uc001apd.3/473, intron 2 of 12)	1	8412464	8483747	71284	2	473	uc001apd.3	38741	ENSG00000142599	RERE	arginine-glutamic acid dipeptide repeats
chr1	8498962	8499556	595	*	MACS_peak_40	71.55	Intron (uc001ape.3/473, intron 12 of 23)	1	8412464	8483747	71284	2	473	uc001apd.3	-15215	ENSG00000142599	RERE	arginine-glutamic acid dipeptide repeats
chr1	8772870	8773212	343	*	MACS_peak_41	53.81	Intron (uc001ape.3/473, intron 2 of 23)	1	8525030	8813897	288868	2	473	uc001aph.1	40685	ENSG00000142599	RERE	arginine-glutamic acid dipeptide repeats
chr1	8936476	8937239	764	*	MACS_peak_43	63.59	Promoter (1-2kb)	1	8938894	8939943	1050	1	100505975	uc021oft.1	-1655	ENSG00000230679	ENO1-AS1	ENO1 antisense RNA 1
chr1	9167087	9167581	495	*	MACS_peak_44	55.28	Intron (uc001apq.1/80045, intron 2 of 3)	1	9117507	9148510	31004	2	6518	uc021ofv.1	-18577	ENSG00000142583	SLC2A5	solute carrier family 2 member 5
chr1	9180359	9181055	697	*	MACS_peak_45	65.25	Intron (uc001apq.1/80045, intron 1 of 3)	1	9164476	9189229	24754	2	80045	uc001apq.1	8174	ENSG00000180758	GPR157	G protein-coupled receptor 157
chr1	9327091	9327389	299	*	MACS_peak_47	87.3	3' UTR	1	9352941	9429590	76650	1	80176	uc010oae.2	-25552	ENSG00000171621	SPSB1	splA/ryanodine receptor domain and SOCS box containing 1
chr1	9362783	9363655	873	*	MACS_peak_48	91.84	Intron (uc010oae.2/80176, intron 1 of 2)	1	9352941	9429590	76650	1	80176	uc010oae.2	9842	ENSG00000171621	SPSB1	splA/ryanodine receptor domain and SOCS box containing 1
chr1	9375331	9375962	632	*	MACS_peak_49	51.35	Intron (uc010oae.2/80176, intron 1 of 2)	1	9352941	9429590	76650	1	80176	uc010oae.2	22390	ENSG00000171621	SPSB1	splA/ryanodine receptor domain and SOCS box containing 1
chr1	9497751	9499097	1347	*	MACS_peak_50	91.63	Exon (uc021ofx.1/uc021ofx.1, exon 1 of 1)	1	9415766	9429590	13825	1	80176	uc001apv.3	81985	ENSG00000171621	SPSB1	splA/ryanodine receptor domain and SOCS box containing 1
chr1	9777077	9778003	927	*	MACS_peak_54	162.75	Exon (uc001aqb.4/5293, exon 7 of 24)	1	9770163	9789172	19010	1	5293	uc001aqe.4	6914	ENSG00000171608	PIK3CD	phosphatidylinositol-4,5-bisphosphate 3-kinase catalytic subunit delta
chr1	9797095	9797453	359	*	MACS_peak_55	96.75	Intron (uc001aqh.3/22883, intron 11 of 18)	1	9789079	9793604	4526	2	22883	uc001aqf.3	-3491	ENSG00000171603	CLSTN1	calsyntenin 1
chr1	9953105	9953840	736	*	MACS_peak_56	56.02	Intron (uc001aqk.1/56998, intron 1 of 5)	1	9908334	9970316	61983	2	56998	uc001aqk.1	16476	ENSG00000178585	CTNNBIP1	catenin beta interacting protein 1
chr1	10002990	10003476	487	*	MACS_peak_57	75.93	Promoter (<=1kb)	1	9989776	10003387	13612	2	84328	uc001aqo.3	0	ENSG00000162441	LZIC	leucine zipper and CTNNBIP1 domain containing
chr1	10061025	10061780	756	*	MACS_peak_58	70.22	Intron (uc001aqq.3/116362, intron 1 of 3)	1	10057255	10076078	18824	1	116362	uc009vms.3	3770	ENSG00000162444	RBP7	retinol binding protein 7
chr1	10092766	10093709	944	*	MACS_peak_59	122.29	Promoter (<=1kb)	1	10093041	10241296	148256	1	10277	uc001aqr.4	0	ENSG00000130939	UBE4B	ubiquitination factor E4B
chr1	10117388	10117925	538	*	MACS_peak_60	52.67	Intron (uc001aqr.4/10277, intron 1 of 26)	1	10093041	10241296	148256	1	10277	uc021ogc.1	24347	ENSG00000130939	UBE4B	ubiquitination factor E4B
chr1	10134073	10135039	967	*	MACS_peak_61	139.21	Intron (uc001aqr.4/10277, intron 2 of 26)	1	10093041	10241296	148256	1	10277	uc021ogc.1	41032	ENSG00000130939	UBE4B	ubiquitination factor E4B
chr1	10532233	10532802	570	*	MACS_peak_62	89.41	Promoter (<=1kb)	1	10520603	10532613	12011	2	1676	uc001arj.3	0	ENSG00000160049	DFFA	DNA fragmentation factor subunit alpha
chr1	10588065	10588338	274	*	MACS_peak_63	82.77	Promoter (<=1kb)	1	10588312	10690815	102504	1	5195	uc009vmw.3	0	ENSG00000142655	PEX14	peroxisomal biogenesis factor 14
chr1	11039516	11039920	405	*	MACS_peak_65	122.69	Promoter (2-3kb)	1	11006530	11042094	35565	2	148345	uc010oao.2	2174	ENSG00000175262	C1orf127	chromosome 1 open reading frame 127
chr1	11122485	11123357	873	*	MACS_peak_66	112.49	Promoter (2-3kb)	1	11114649	11120091	5443	2	6723	uc001arz.1	-2394	ENSG00000116649	SRM	spermidine synthase
chr1	11169090	11169692	603	*	MACS_peak_67	103.85	Exon (uc001asc.3/2475, exon 18 of 20)	1	11139768	11159938	20171	2	5394	uc009vmy.1	-9152	ENSG00000171824	EXOSC10	exosome component 10
chr1	11234320	11234934	615	*	MACS_peak_68	86.31	Intron (uc001asd.3/2475, intron 28 of 57)	1	11249346	11256038	6693	1	10218	uc001ase.4	-14412	ENSG00000171819	ANGPTL7	angiopoietin like 7
chr1	11240101	11240731	631	*	MACS_peak_69	83.89	Intron (uc001asd.3/2475, intron 28 of 57)	1	11249346	11256038	6693	1	10218	uc001ase.4	-8615	ENSG00000171819	ANGPTL7	angiopoietin like 7
chr1	11707819	11708401	583	*	MACS_peak_71	142.77	Downstream (<1kb)	1	11709144	11714401	5258	2	26232	uc009vnb.1	6000	ENSG00000116661	FBXO2	F-box protein 2
chr1	11866019	11866474	456	*	MACS_peak_72	201.6	Promoter (<=1kb)	1	11866153	11876844	10692	1	1185	uc009vne.2	0	ENSG00000011021	CLCN6	chloride voltage-gated channel 6
chr1	12000532	12001309	778	*	MACS_peak_74	72.27	Intron (uc001atm.3/5351, intron 1 of 18)	1	11994724	12035599	40876	1	5351	uc010obb.2	5808	ENSG00000083444	PLOD1	procollagen-lysine,2-oxoglutarate 5-dioxygenase 1
chr1	12009126	12009680	555	*	MACS_peak_75	60.17	Intron (uc001atm.3/5351, intron 2 of 18)	1	11994724	12035599	40876	1	5351	uc010obb.2	14402	ENSG00000083444	PLOD1	procollagen-lysine,2-oxoglutarate 5-dioxygenase 1
chr1	12039699	12040172	474	*	MACS_peak_76	50.04	Promoter (<=1kb)	1	12040238	12073572	33335	1	9927	uc001atn.4	-66	ENSG00000116688	MFN2	mitofusin 2
chr1	12192851	12193674	824	*	MACS_peak_77	65.46	Intron (uc001atq.3/943, intron 12 of 14)	1	12185958	12204264	18307	1	943	uc001ats.3	6893	ENSG00000120949	TNFRSF8	TNF receptor superfamily member 8
chr1	12203629	12204184	556	*	MACS_peak_78	90.85	3' UTR	1	12185958	12204264	18307	1	943	uc001ats.3	17671	ENSG00000120949	TNFRSF8	TNF receptor superfamily member 8
chr1	12380404	12380896	493	*	MACS_peak_79	50.91	Intron (uc001atv.3/55187, intron 32 of 69)	1	12371511	12398045	26535	1	55187	uc001aty.1	8893	ENSG00000048707	VPS13D	vacuolar protein sorting 13 homolog D
chr1	12465686	12467086	1401	*	MACS_peak_80	81.8	Promoter (2-3kb)	1	12469884	12572098	102215	1	55187	uc010obd.2	-2798	ENSG00000048707	VPS13D	vacuolar protein sorting 13 homolog D
chr1	12537869	12538909	1041	*	MACS_peak_81	98.9	Intron (uc001atv.3/55187, intron 67 of 69)	1	12567300	12567451	152	1	677882	uc001atz.1	-28391	ENSG00000266079	SNORA59B	small nucleolar RNA, H/ACA box 59B
chr1	12545521	12546237	717	*	MACS_peak_82	58.48	Intron (uc001atv.3/55187, intron 67 of 69)	1	12567300	12567451	152	1	677882	uc001atz.1	-21063	ENSG00000266079	SNORA59B	small nucleolar RNA, H/ACA box 59B
chr1	14075333	14075687	355	*	MACS_peak_87	54.68	Promoter (<=1kb)	1	14075856	14107358	31503	1	7799	uc021ogk.1	-169	ENSG00000116731	PRDM2	PR/SET domain 2
chr1	15202377	15202840	464	*	MACS_peak_91	59.08	Intron (uc009vog.1/23254, intron 1 of 7)	1	15250625	15394651	144027	1	23254	uc001avo.2	-47785	ENSG00000189337	KAZN	kazrin, periplakin interacting protein
chr1	15294797	15295614	818	*	MACS_peak_92	214.39	Intron (uc009vog.1/23254, intron 2 of 7)	1	15287180	15394651	107472	1	23254	uc001avr.2	7617	ENSG00000189337	KAZN	kazrin, periplakin interacting protein
chr1	15506217	15507347	1131	*	MACS_peak_93	414.78	Intron (uc001avw.4/55092, intron 1 of 3)	1	15480229	15546974	66746	1	55092	uc001avy.3	25988	ENSG00000171729	TMEM51	transmembrane protein 51
chr1	15544970	15545554	585	*	MACS_peak_94	69.75	Intron (uc001avw.4/55092, intron 3 of 3)	1	15573768	15672019	98252	1	114827	uc001awa.1	-28214	ENSG00000142621	FHAD1	forkhead associated phosphopeptide binding domain 1
chr1	15622233	15622917	685	*	MACS_peak_95	80.84	Intron (uc001awa.1/114827, intron 4 of 15)	1	15668232	15711054	42823	1	114827	uc001awd.1	-45315	ENSG00000142621	FHAD1	forkhead associated phosphopeptide binding domain 1
chr1	15853047	15853543	497	*	MACS_peak_96	161.35	Promoter (<=1kb)	1	15853352	15893091	39740	1	23341	uc001awr.1	0	ENSG00000116138	DNAJC16	DnaJ heat shock protein family (Hsp40) member C16
chr1	16041017	16041497	481	*	MACS_peak_98	62.38	Intron (uc010obo.2/23207, intron 1 of 19)	1	16062809	16067884	5076	1	284723	uc001axb.1	-21312	ENSG00000162461	SLC25A34	solute carrier family 25 member 34
chr1	16175858	16176466	609	*	MACS_peak_99	67.35	Promoter (1-2kb)	1	16160710	16174642	13933	2	729614	uc001axj.2	-1216	ENSG00000179743	FLJ37453	uncharacterized LOC729614
chr1	17053847	17054374	528	*	MACS_peak_100	63.31	Exon (uc021oha.1/uc021oha.1, exon 1 of 1)	1	17017713	17046652	28940	2	284729	uc001azn.1	-7195	ENSG00000268869	ESPNP	espin pseudogene
chr1	17231869	17232415	547	*	MACS_peak_101	56.19	Intron (uc009voy.1/9696, intron 1 of 8)	1	17248445	17299474	51030	1	9696	uc001azt.2	-16030	ENSG00000058453	CROCC	ciliary rootlet coiled-coil, rootletin
chr1	17247976	17248392	417	*	MACS_peak_102	50.16	Promoter (<=1kb)	1	17248445	17299474	51030	1	9696	uc001azt.2	-53	ENSG00000058453	CROCC	ciliary rootlet coiled-coil, rootletin
chr1	17342355	17343325	971	*	MACS_peak_103	80.38	Downstream (1-2kb)	1	17312453	17338423	25971	2	23400	uc001bac.2	-3932	ENSG00000159363	ATP13A2	ATPase 13A2
chr1	17415824	17416633	810	*	MACS_peak_104	256.44	Intron (uc001baf.3/11240, intron 6 of 15)	1	17393256	17445948	52693	2	11240	uc001baf.3	29315	ENSG00000117115	PADI2	peptidyl arginine deiminase 2
chr1	17703775	17704158	384	*	MACS_peak_106	63.51	Intron (uc001bak.1/353238, intron 3 of 16)	1	17698741	17728195	29455	1	353238	uc001bak.1	5034	ENSG00000276747	PADI6	peptidyl arginine deiminase 6
chr1	17896067	17896733	667	*	MACS_peak_108	53.12	Intron (uc031pli.1/55160, intron 1 of 1)	1	17907048	18024370	117323	1	55160	uc001bao.3	-10315	ENSG00000074964	ARHGEF10L	Rho guanine nucleotide exchange factor 10 like
chr1	18970713	18971110	398	*	MACS_peak_111	51.48	Intron (uc001bay.3/5081, intron 4 of 7)	1	18957500	19075360	117861	1	5081	uc010oct.2	13213	ENSG00000009709	PAX7	paired box 7
chr1	19252844	19253294	451	*	MACS_peak_112	51.46	Intron (uc001bbd.2/126917, intron 1 of 8)	1	19197924	19229293	31370	2	8659	uc021ohl.1	-23551	ENSG00000159423	ALDH4A1	aldehyde dehydrogenase 4 family member A1
chr1	19281238	19281971	734	*	MACS_peak_113	54.69	Promoter (<=1kb)	1	19230774	19282826	52053	2	126917	uc001bbd.2	855	ENSG00000169991	IFFO2	intermediate filament family orphan 2
chr1	19959687	19960079	393	*	MACS_peak_115	87.3	Intron (uc009vpl.2/100532736, intron 1 of 3)	1	19969723	19984949	15227	1	4681	uc001bcj.2	-9644	ENSG00000158747	NBL1	neuroblastoma 1, DAN family BMP antagonist
chr1	19972165	19972567	403	*	MACS_peak_116	58.66	Promoter (<=1kb)	1	19972260	19984949	12690	1	4681	uc021ohz.1	0	ENSG00000158747	NBL1	neuroblastoma 1, DAN family BMP antagonist
chr1	20037300	20037811	512	*	MACS_peak_117	74.1	Intron (uc001bcn.3/255104, intron 13 of 15)	1	19991780	20006055	14276	1	3362	uc001bcl.3	45520	ENSG00000158748	HTR6	5-hydroxytryptamine receptor 6
chr1	20208695	20209027	333	*	MACS_peak_118	76.64	Promoter (<=1kb)	1	20208888	20239437	30550	1	23252	uc001bcs.4	0	ENSG00000169914	OTUD3	OTU deubiquitinase 3
chr1	21059478	21059924	447	*	MACS_peak_119	89.59	Promoter (<=1kb)	1	21046225	21059330	13106	2	400745	uc001bdu.1	-148	ENSG00000189410	SH2D5	SH2 domain containing 5
chr1	21417549	21417849	301	*	MACS_peak_120	66.25	Promoter (1-2kb)	1	21267738	21415706	147969	2	8672	uc010odk.2	-1843	ENSG00000075151	EIF4G3	eukaryotic translation initiation factor 4 gamma 3
chr1	21660381	21661163	783	*	MACS_peak_122	87.69	Intron (uc001bem.2/1889, intron 1 of 18)	1	21543740	21672034	128295	2	1889	uc001bem.2	10871	ENSG00000117298	ECE1	endothelin converting enzyme 1
chr1	22032915	22033390	476	*	MACS_peak_123	75.68	Promoter (1-2kb)	1	22012385	22031108	18724	2	84196	uc001bfd.1	-1807	ENSG00000090686	USP48	ubiquitin specific peptidase 48
chr1	22448691	22449327	637	*	MACS_peak_125	62.18	Intron (uc001bfs.4/54361, intron 2 of 4)	1	22443798	22469519	25722	2	54361	uc001bfs.4	20192	ENSG00000162552	WNT4	Wnt family member 4
chr1	22777635	22778897	1263	*	MACS_peak_128	123.05	Promoter (<=1kb)	1	22778344	22857650	79307	1	9923	uc001bft.2	0	ENSG00000184677	ZBTB40	zinc finger and BTB domain containing 40
chr1	24136075	24136539	465	*	MACS_peak_130	102.46	Intron (uc001bib.3/3155, intron 6 of 8)	1	24130890	24144073	13184	2	3155	uc021oii.1	7534	ENSG00000117305	HMGCL	3-hydroxymethyl-3-methylglutaryl-CoA lyase
chr1	24151767	24152424	658	*	MACS_peak_131	59.95	Promoter (<=1kb)	1	24128367	24151949	23583	2	3155	uc001bib.3	0	ENSG00000117305	HMGCL	3-hydroxymethyl-3-methylglutaryl-CoA lyase
chr1	24306779	24307198	420	*	MACS_peak_132	53.45	Promoter (<=1kb)	1	24292937	24306953	14017	2	10772	uc001bij.2	0	ENSG00000188529	SRSF10	serine and arginine rich splicing factor 10
chr1	24648804	24649284	481	*	MACS_peak_134	175.51	Promoter (<=1kb)	1	24649530	24681808	32279	1	57822	uc001biy.3	-246	ENSG00000158055	GRHL3	grainyhead like transcription factor 3
chr1	24762262	24762694	433	*	MACS_peak_135	115.74	Intron (uc010oek.2/57185, intron 2 of 7)	1	24782628	24792864	10237	1	57185	uc001bji.3	-19934	ENSG00000001461	NIPAL3	NIPA like domain containing 3
chr1	24786431	24786664	234	*	MACS_peak_136	85.97	Intron (uc001bjh.3/57185, intron 9 of 11)	1	24782628	24792864	10237	1	57185	uc001bji.3	3803	ENSG00000001461	NIPAL3	NIPA like domain containing 3
chr1	24969186	24969976	791	*	MACS_peak_137	97.71	Promoter (<=1kb)	1	24969594	24999772	30179	1	10250	uc001bjm.3	0	ENSG00000133226	SRRM1	serine and arginine repetitive matrix 1
chr1	25237232	25238687	1456	*	MACS_peak_140	89.58	Intron (uc001bjq.3/864, intron 3 of 4)	1	25226002	25256770	30769	2	864	uc001bjq.3	18083	ENSG00000020633	RUNX3	runt related transcription factor 3
chr1	25285935	25286446	512	*	MACS_peak_141	56.13	Intron (uc009vrj.3/864, intron 2 of 6)	1	25226002	25291475	65474	2	864	uc009vrj.3	5029	ENSG00000020633	RUNX3	runt related transcription factor 3
chr1	25889937	25890827	891	*	MACS_peak_144	257.83	Promoter (<=1kb)	1	25889298	25895377	6080	1	26119	uc009vrx.3	639	ENSG00000157978	LDLRAP1	low density lipoprotein receptor adaptor protein 1
chr1	26069988	26070339	352	*	MACS_peak_145	216.03	Intron (uc001bkm.2/57134, intron 2 of 11)	1	26126667	26144713	18047	1	57190	uc021ojk.1	-56328	ENSG00000162430	SELENON	selenoprotein N
chr1	26232811	26233139	329	*	MACS_peak_146	68.19	Promoter (<=1kb)	1	26232853	26232945	93	2	100500808	uc021ojn.1	0	ENSG00000283938	MIR3917	microRNA 3917
chr1	26324535	26324970	436	*	MACS_peak_147	118.47	Promoter (<=1kb)	1	26286258	26324648	38391	2	5051	uc001bld.4	0	ENSG00000158006	PAFAH2	platelet activating factor acetylhydrolase 2
chr1	26354725	26355736	1012	*	MACS_peak_148	126.71	Exon (uc001blf.3/2134, exon 2 of 11)	1	26348271	26362954	14684	1	2134	uc001blf.3	6454	ENSG00000158008	EXTL1	exostosin like glycosyltransferase 1
chr1	26376205	26376672	468	*	MACS_peak_149	72.16	Downstream (1-2kb)	1	26364514	26372604	8091	2	7780	uc001blh.1	-3601	ENSG00000158014	SLC30A2	solute carrier family 30 member 2
chr1	26385007	26385492	486	*	MACS_peak_150	55.62	Exon (uc001bli.2/84676, exon 5 of 9)	1	26377796	26394125	16330	2	84676	uc001bli.2	8633	ENSG00000158022	TRIM63	tripartite motif containing 63
chr1	26394027	26394462	436	*	MACS_peak_151	199.81	Promoter (<=1kb)	1	26377796	26394125	16330	2	84676	uc001bli.2	0	ENSG00000158022	TRIM63	tripartite motif containing 63
chr1	26604418	26605269	852	*	MACS_peak_153	61.53	Promoter (<=1kb)	1	26606213	26608013	1801	1	83442	uc001blu.3	-944	ENSG00000142669	SH3BGRL3	SH3 domain binding glutamate rich protein like 3
chr1	26758517	26759090	574	*	MACS_peak_154	86.64	Promoter (<=1kb)	1	26758773	26797795	39023	1	79947	uc001bmk.3	0	ENSG00000117682	DHDDS	dehydrodolichyl diphosphate synthase subunit
chr1	27327919	27328682	764	*	MACS_peak_158	75.38	Intron (uc021ojq.1/uc021ojq.1, intron 1 of 1)	1	27320195	27327377	7183	1	388610	uc001bnj.4	7724	ENSG00000253368	TRNP1	TMF1-regulated nuclear protein 1
chr1	27464052	27464395	344	*	MACS_peak_159	145.35	Intron (uc001bnm.4/6548, intron 1 of 11)	1	27425300	27481621	56322	2	6548	uc001bnm.4	17226	ENSG00000090020	SLC9A1	solute carrier family 9 member A1
chr1	27728748	27729386	639	*	MACS_peak_160	58.23	Downstream (1-2kb)	1	27719148	27722317	3170	1	2827	uc001bod.4	9600	ENSG00000181773	GPR3	G protein-coupled receptor 3
chr1	27743084	27743353	270	*	MACS_peak_161	60.08	Intron (uc001bof.2/10163, intron 4 of 8)	1	27719148	27722317	3170	1	2827	uc001bod.4	23936	ENSG00000181773	GPR3	G protein-coupled receptor 3
chr1	27998981	27999533	553	*	MACS_peak_163	87.3	Promoter (<=1kb)	1	27992572	27998724	6153	2	2537	uc001bop.1	-257	ENSG00000126709	IFI6	interferon alpha inducible protein 6
chr1	28051627	28052420	794	*	MACS_peak_164	89.54	Promoter (<=1kb)	1	28052490	28086275	33786	1	199870	uc009vtb.3	-70	ENSG00000009780	FAM76A	family with sequence similarity 76 member A
chr1	28201730	28202047	318	*	MACS_peak_165	80.26	Promoter (2-3kb)	1	28199055	28213193	14139	1	9473	uc010ofo.2	2675	ENSG00000130775	THEMIS2	thymocyte selection associated family member 2
chr1	28523338	28524100	763	*	MACS_peak_166	50.14	Promoter (2-3kb)	1	28473677	28520447	46771	2	5724	uc009vte.3	-2891	ENSG00000169403	PTAFR	platelet activating factor receptor
chr1	28559311	28559698	388	*	MACS_peak_167	141.82	Promoter (<=1kb)	1	28526790	28559542	32753	2	22826	uc001bpn.3	0	ENSG00000126698	DNAJC8	DnaJ heat shock protein family (Hsp40) member C8
chr1	28878905	28879590	686	*	MACS_peak_168	69.54	Promoter (<=1kb)	1	28879529	28905057	25529	1	54952	uc001bqh.4	0	ENSG00000180098	TRNAU1AP	tRNA selenocysteine 1 associated protein 1
chr1	28908276	28908739	464	*	MACS_peak_169	54.67	Promoter (<=1kb)	1	28905050	28908366	3317	2	85028	uc001bqk.3	0	ENSG00000197989	SNHG12	small nucleolar RNA host gene 12
chr1	28916607	28917041	435	*	MACS_peak_170	51.88	Promoter (1-2kb)	1	28918712	28921088	2377	1	115273	uc001bqu.3	-1671	ENSG00000188060	RAB42	RAB42, member RAS oncogene family
chr1	28975353	28976009	657	*	MACS_peak_171	67.56	Promoter (<=1kb)	1	28975112	28975246	135	1	26824	uc009vtj.1	241	ENSG00000274978	RNU11	RNA, U11 small nuclear
chr1	29211467	29211817	351	*	MACS_peak_172	75.35	Promoter (1-2kb)	1	29213603	29446558	232956	1	2035	uc001brg.2	-1786	ENSG00000159023	EPB41	erythrocyte membrane protein band 4.1
chr1	32281422	32281826	405	*	MACS_peak_180	82.72	Promoter (<=1kb)	1	32256025	32281580	25556	2	90853	uc001bts.1	0	ENSG00000134668	SPOCD1	SPOC domain containing 1
chr1	32478932	32479347	416	*	MACS_peak_181	69.49	Promoter (<=1kb)	1	32479295	32509482	30188	1	10657	uc001bua.2	0	ENSG00000121774	KHDRBS1	KH RNA binding domain containing, signal transduction associated 1
chr1	32712325	32713279	955	*	MACS_peak_182	131.39	Promoter (<=1kb)	1	32712818	32714461	1644	1	84734	uc001buw.3	0	ENSG00000183615	FAM167B	family with sequence similarity 167 member B
chr1	33116315	33117025	711	*	MACS_peak_184	81.75	Promoter (<=1kb)	1	33116749	33151812	35064	1	5928	uc001bvr.3	0	ENSG00000162521	RBBP4	RB binding protein 4, chromatin remodeling factor
chr1	33470981	33471831	851	*	MACS_peak_186	183.72	Intron (uc001bwn.3/uc001bwn.3, intron 1 of 1)	1	33473541	33502512	28972	2	204	uc001bwo.2	30681	ENSG00000004455	AK2	adenylate kinase 2
chr1	33564876	33565497	622	*	MACS_peak_188	102.22	Intron (uc001bwr.3/113451, intron 10 of 11)	1	33547779	33585995	38217	1	113451	uc009vug.3	17097	ENSG00000142920	AZIN2	antizyme inhibitor 2
chr1	33626634	33627255	622	*	MACS_peak_189	64.39	Intron (uc001bxb.3/55223, intron 2 of 4)	1	33611003	33647671	36669	2	55223	uc001bxb.3	20416	ENSG00000116525	TRIM62	tripartite motif containing 62
chr1	33829540	33830331	792	*	MACS_peak_191	50.03	Intron (uc001bxg.1/1912, intron 6 of 13)	1	33789224	33841194	51971	2	1912	uc001bxg.1	10863	ENSG00000134686	PHC2	polyhomeotic homolog 2
chr1	33886712	33886992	281	*	MACS_peak_192	86.71	Intron (uc009vuh.1/1912, intron 1 of 14)	1	33789224	33896216	106993	2	1912	uc009vuh.1	9224	ENSG00000134686	PHC2	polyhomeotic homolog 2
chr1	33899225	33899741	517	*	MACS_peak_193	103.68	Promoter (2-3kb)	1	33832717	33896615	63899	2	1912	uc001bxi.1	-2610	ENSG00000134686	PHC2	polyhomeotic homolog 2
chr1	35318304	35318567	264	*	MACS_peak_195	70.61	3' UTR	1	35315963	35324646	8684	2	113444	uc021olc.1	6079	ENSG00000163866	SMIM12	small integral membrane protein 12
chr1	35914873	35915455	583	*	MACS_peak_196	70.48	Intron (uc001byw.3/79932, intron 6 of 11)	1	35899091	35920237	21147	2	79932	uc001byw.3	4782	ENSG00000142687	KIAA0319L	KIAA0319 like
chr1	36766823	36767281	459	*	MACS_peak_197	70.99	Exon (uc001cae.4/9967, exon 11 of 12)	1	36771994	36787379	15386	1	79729	uc010oia.1	-4713	ENSG00000214193	SH3D21	SH3 domain containing 21
chr1	36929912	36930699	788	*	MACS_peak_199	186.22	Promoter (<=1kb)	1	36921362	36930040	8679	2	64960	uc001cas.2	0	ENSG00000116898	MRPS15	mitochondrial ribosomal protein S15
chr1	38221901	38222320	420	*	MACS_peak_205	52.74	Promoter (<=1kb)	1	38179560	38222363	42804	2	284656	uc001cbv.2	43	ENSG00000183317	EPHA10	EPH receptor A10
chr1	38477989	38478481	493	*	MACS_peak_206	72.53	Promoter (<=1kb)	1	38478384	38490497	12114	1	51118	uc001ccn.4	0	ENSG00000183520	UTP11	UTP11, small subunit processome component
chr1	39325419	39325880	462	*	MACS_peak_208	134.3	Promoter (<=1kb)	1	39303869	39325495	21627	2	64121	uc001ccq.3	0	ENSG00000116954	RRAGC	Ras related GTP binding C
chr1	39864099	39864721	623	*	MACS_peak_209	103.55	Intron (uc001cdc.2/23499, intron 51 of 61)	1	39875176	39882154	6979	1	643314	uc009vvt.1	-10455	ENSG00000127603	KIAA0754	KIAA0754
chr1	40006250	40006697	448	*	MACS_peak_210	88.73	Intron (uc001cdk.3/728448, intron 7 of 8)	1	39987952	39991357	3406	2	728448	uc001cdj.2	-14893	NA	PPIEL	peptidylprolyl isomerase E like pseudogene
chr1	40522890	40523512	623	*	MACS_peak_211	74.97	Intron (uc010ojd.1/10487, intron 1 of 2)	1	40506255	40538321	32067	1	10487	uc010oje.2	16635	ENSG00000131236	CAP1	cyclase associated actin cytoskeleton regulatory protein 1
chr1	40562732	40563106	375	*	MACS_peak_212	62.66	Promoter (<=1kb)	1	40538382	40563142	24761	2	5538	uc001cfb.2	36	ENSG00000131238	PPT1	palmitoyl-protein thioesterase 1
chr1	41588747	41589229	483	*	MACS_peak_215	60.98	Intron (uc010ojr.2/22955, intron 2 of 8)	1	41492871	41625605	132735	2	22955	uc010ojr.2	36376	ENSG00000010803	SCMH1	Scm polycomb group protein homolog 1
chr1	41678950	41679335	386	*	MACS_peak_216	62.66	Intron (uc001cgq.3/22955, intron 1 of 14)	1	41492871	41707815	214945	2	22955	uc001cgq.3	28480	ENSG00000010803	SCMH1	Scm polycomb group protein homolog 1
chr1	41980672	41981145	474	*	MACS_peak_218	117.39	Intron (uc001cgy.3/59269, intron 3 of 4)	1	41944446	41950344	5899	2	1907	uc001cgx.3	-30328	ENSG00000127129	EDN2	endothelin 2
chr1	42306219	42306823	605	*	MACS_peak_219	51.92	Intron (uc001cgz.4/59269, intron 1 of 8)	1	41972036	42384496	412461	2	59269	uc001cgz.4	77673	ENSG00000127124	HIVEP3	human immunodeficiency virus type I enhancer binding protein 3
chr1	42421003	42421611	609	*	MACS_peak_220	194.09	Intron (uc001chb.2/59269, intron 1 of 3)	1	41972036	42384496	412461	2	59269	uc001cha.4	-36507	ENSG00000127124	HIVEP3	human immunodeficiency virus type I enhancer binding protein 3
chr1	42921272	42922038	767	*	MACS_peak_221	131.27	Promoter (<=1kb)	1	42896001	42921938	25938	2	84217	uc001chj.3	0	ENSG00000066185	ZMYND12	zinc finger MYND-type containing 12
chr1	43147412	43148028	617	*	MACS_peak_222	77.7	Promoter (<=1kb)	1	43148066	43168020	19955	1	4904	uc001chs.3	-38	ENSG00000065978	YBX1	Y-box binding protein 1
chr1	43418754	43419673	920	*	MACS_peak_223	68.38	Intron (uc001cik.2/6513, intron 1 of 9)	1	43424720	43449029	24310	1	440584	uc001cil.3	-5047	ENSG00000227533	SLC2A1-AS1	SLC2A1 antisense RNA 1
chr1	43602957	43603631	675	*	MACS_peak_224	76.62	Intron (uc009vwn.1/uc009vwn.1, intron 1 of 2)	1	43613594	43622067	8474	1	440585	uc009vwo.3	-9963	ENSG00000186973	FAM183A	family with sequence similarity 183 member A
chr1	43774164	43774470	307	*	MACS_peak_225	70.61	Promoter (1-2kb)	1	43772813	43788781	15969	1	7075	uc010okg.2	1351	ENSG00000066056	TIE1	tyrosine kinase with immunoglobulin like and EGF like domains 1
chr1	43847502	43848091	590	*	MACS_peak_226	50.2	Downstream (1-2kb)	1	43849579	43855483	5905	2	112950	uc001cje.2	7392	ENSG00000159479	MED8	mediator complex subunit 8
chr1	44300351	44301113	763	*	MACS_peak_227	52.54	Intron (uc009vwu.1/6487, intron 5 of 7)	1	44398992	44402912	3921	1	9048	uc001cks.3	-97879	ENSG00000117407	ARTN	artemin
chr1	44412624	44413161	538	*	MACS_peak_228	50.89	Promoter (<=1kb)	1	44412478	44433694	21217	1	9670	uc001ckx.3	146	ENSG00000117408	IPO13	importin 13
chr1	44440037	44440731	695	*	MACS_peak_229	76.76	Promoter (<=1kb)	1	44440602	44443972	3371	1	533	uc001cld.3	0	ENSG00000117410	ATP6V0B	ATPase H+ transporting V0 subunit b
chr1	44963036	44963527	492	*	MACS_peak_230	87.87	Intron (uc001clv.1/55182, intron 2 of 14)	1	45011165	45011224	60	1	100847089	uc031pmh.1	-47638	ENSG00000263381	MIR5584	microRNA 5584
chr1	45097383	45097756	374	*	MACS_peak_231	56.41	Promoter (<=1kb)	1	45097704	45117395	19692	1	55182	uc010okz.2	0	ENSG00000187147	RNF220	ring finger protein 220
chr1	45125962	45126338	377	*	MACS_peak_232	125.92	Promoter (<=1kb)	1	45119909	45125967	6059	2	79639	uc010ola.1	0	ENSG00000126106	TMEM53	transmembrane protein 53
chr1	45272894	45273960	1067	*	MACS_peak_233	176.28	Promoter (<=1kb)	1	45271586	45272957	1372	2	343521	uc001cmp.3	0	ENSG00000188396	TCTEX1D4	Tctex1 domain containing 4
chr1	46016298	46017102	805	*	MACS_peak_234	66.45	Promoter (<=1kb)	1	46016455	46035723	19269	1	10327	uc001cod.3	0	ENSG00000117448	AKR1A1	aldo-keto reductase family 1 member A1
chr1	46337763	46338118	356	*	MACS_peak_235	56.41	Intron (uc001cov.3/23139, intron 3 of 28)	1	46330050	46496962	166913	1	23139	uc001coy.1	7713	ENSG00000086015	MAST2	microtubule associated serine/threonine kinase 2
chr1	46502621	46502998	378	*	MACS_peak_236	65.95	Downstream (2-3kb)	1	46505812	46527810	21999	2	8503	uc010olv.2	24812	ENSG00000117461	PIK3R3	phosphoinositide-3-kinase regulatory subunit 3
chr1	46622148	46622584	437	*	MACS_peak_237	66.1	Intron (uc010olw.2/8503, intron 1 of 9)	1	46640749	46651634	10886	1	10103	uc001cpd.3	-18165	ENSG00000117472	TSPAN1	tetraspanin 1
chr1	46654157	46654563	407	*	MACS_peak_238	70.21	3' UTR	1	46655789	46658237	2449	2	55624	uc001cph.1	3674	ENSG00000085998	POMGNT1	protein O-linked mannose N-acetylglucosaminyltransferase 1 (beta 1,2-)
chr1	46687451	46687834	384	*	MACS_peak_239	105.71	Promoter (1-2kb)	1	46654353	46685977	31625	2	55624	uc001cpg.3	-1474	ENSG00000085998	POMGNT1	protein O-linked mannose N-acetylglucosaminyltransferase 1 (beta 1,2-)
chr1	48397087	48397529	443	*	MACS_peak_243	58.8	Intron (uc021ong.1/388630, intron 2 of 6)	1	48226200	48462562	236363	2	388630	uc021ong.1	65033	ENSG00000269113	TRABD2B	TraB domain containing 2B
chr1	49309771	49310210	440	*	MACS_peak_245	58.44	Intron (uc001cru.2/84871, intron 6 of 13)	1	49193540	49242547	49008	2	79656	uc001crx.4	-67224	ENSG00000162373	BEND5	BEN domain containing 5
chr1	49564518	49564843	326	*	MACS_peak_246	82.77	Intron (uc001cru.2/84871, intron 4 of 13)	1	49049542	49511472	461931	2	84871	uc010omy.1	-53046	ENSG00000186094	AGBL4	ATP/GTP binding protein like 4
chr1	50289885	50290234	350	*	MACS_peak_247	99.16	Intron (uc001cru.2/84871, intron 2 of 13)	1	48998527	50489626	1491100	2	84871	uc001cru.2	199392	ENSG00000186094	AGBL4	ATP/GTP binding protein like 4
chr1	50602926	50603335	410	*	MACS_peak_248	62.17	Intron (uc001cry.3/1996, intron 1 of 6)	1	50575479	50667540	92062	1	1996	uc010omz.2	27447	ENSG00000162374	ELAVL4	ELAV like RNA binding protein 4
chr1	51425783	51426404	622	*	MACS_peak_249	76.58	Promoter (<=1kb)	1	50906935	51425936	519002	2	11124	uc001cse.1	0	ENSG00000185104	FAF1	Fas associated factor 1
chr1	51701520	51701883	364	*	MACS_peak_250	56.63	Promoter (<=1kb)	1	51701945	51739119	37175	1	26994	uc001csi.4	-62	ENSG00000123091	RNF11	ring finger protein 11
chr1	52049340	52049689	350	*	MACS_peak_253	99.65	Intron (uc001css.4/114883, intron 1 of 25)	1	52042851	52254891	212041	1	114883	uc001css.4	6489	ENSG00000117859	OSBPL9	oxysterol binding protein like 9
chr1	52058423	52058824	402	*	MACS_peak_254	122.72	Intron (uc001css.4/114883, intron 1 of 25)	1	52042851	52254891	212041	1	114883	uc001css.4	15572	ENSG00000117859	OSBPL9	oxysterol binding protein like 9
chr1	52064609	52065206	598	*	MACS_peak_255	56.46	Intron (uc001css.4/114883, intron 2 of 25)	1	52082546	52254891	172346	1	114883	uc001cst.4	-17340	ENSG00000117859	OSBPL9	oxysterol binding protein like 9
chr1	52197768	52198195	428	*	MACS_peak_256	54.86	Promoter (2-3kb)	1	52195486	52254891	59406	1	114883	uc001cta.3	2282	ENSG00000117859	OSBPL9	oxysterol binding protein like 9
chr1	52439282	52439717	436	*	MACS_peak_257	67.96	Intron (uc001cth.3/5865, intron 2 of 4)	1	52373628	52456436	82809	2	5865	uc001cth.3	16719	ENSG00000169213	RAB3B	RAB3B, member RAS oncogene family
chr1	52498442	52499104	663	*	MACS_peak_258	57.06	Promoter (<=1kb)	1	52497777	52499472	1696	2	112970	uc001ctj.1	368	ENSG00000198841	KTI12	KTI12 chromatin associated homolog
chr1	52539167	52539370	204	*	MACS_peak_259	92.78	Intron (uc001ctk.3/91408, intron 3 of 5)	1	52521857	52556388	34532	1	91408	uc010onh.2	17310	ENSG00000134717	BTF3L4	basic transcription factor 3 like 4
chr1	52831651	52831902	252	*	MACS_peak_260	102.78	Promoter (<=1kb)	1	52816265	52831877	15613	2	200014	uc001ctq.2	0	ENSG00000154222	CC2D1B	coiled-coil and C2 domain containing 1B
chr1	53163481	53164258	778	*	MACS_peak_261	79.23	Promoter (<=1kb)	1	53152014	53164038	12025	2	65260	uc001cui.2	0	ENSG00000162377	COA7	cytochrome c oxidase assembly factor 7 (putative)
chr1	53370634	53371048	415	*	MACS_peak_262	65.33	3' UTR	1	53370706	53387258	16553	2	55268	uc010onl.1	16210	ENSG00000121310	ECHDC2	enoyl-CoA hydratase domain containing 2
chr1	53746620	53747236	617	*	MACS_peak_263	51.37	Intron (uc001cvh.2/7804, intron 3 of 15)	1	53716362	53734270	17909	2	7804	uc001cvm.1	-12350	ENSG00000157193	LRP8	LDL receptor related protein 8
chr1	54303573	54304080	508	*	MACS_peak_264	50.66	Promoter (<=1kb)	1	54231134	54304225	73092	2	55706	uc001cvs.3	145	ENSG00000058804	NDC1	NDC1 transmembrane nucleoporin
chr1	54494458	54494981	524	*	MACS_peak_265	93.72	Downstream (2-3kb)	1	54472971	54483859	10889	2	388633	uc031pmq.1	-10599	ENSG00000203985	LDLRAD1	low density lipoprotein receptor class A domain containing 1
chr1	54665140	54665715	576	*	MACS_peak_266	56.63	Promoter (<=1kb)	1	54638027	54665746	27720	2	606495	uc001cwx.5	31	ENSG00000215883	CYB5RL	cytochrome b5 reductase like
chr1	54752504	54753263	760	*	MACS_peak_267	71.05	Intron (uc001cxe.4/23648, intron 4 of 17)	1	54665840	54684056	18217	1	51253	uc009vzp.3	86664	ENSG00000116221	MRPL37	mitochondrial ribosomal protein L37
chr1	55043380	55043763	384	*	MACS_peak_268	63.86	Intron (uc001cxj.2/26027, intron 1 of 14)	1	55013807	55100417	86611	1	26027	uc001cxm.2	29573	ENSG00000162390	ACOT11	acyl-CoA thioesterase 11
chr1	56982497	56982868	372	*	MACS_peak_271	53.81	Intron (uc001cyj.2/8613, intron 4 of 5)	1	56960419	57045257	84839	2	8613	uc001cyj.2	62389	ENSG00000162407	PLPP3	phospholipid phosphatase 3
chr1	57245631	57246238	608	*	MACS_peak_272	54.45	Intron (uc001cym.4/199920, intron 4 of 19)	1	57184477	57227686	43210	2	199920	uc001cyl.3	-17945	ENSG00000187889	FYB2	FYN binding protein 2
chr1	59762724	59763183	460	*	MACS_peak_275	65.4	Promoter (<=1kb)	1	59762625	60228402	465778	1	55277	uc009wac.3	99	ENSG00000172456	FGGY	FGGY carbohydrate kinase domain containing
chr1	60209024	60209835	812	*	MACS_peak_276	115.1	Intron (uc001czi.4/55277, intron 14 of 15)	1	60198899	60198968	70	2	100616409	uc021oob.1	-10056	ENSG00000266150	MIR4711	microRNA 4711
chr1	60218270	60218583	314	*	MACS_peak_277	97.68	Intron (uc001czi.4/55277, intron 14 of 15)	1	60198899	60198968	70	2	100616409	uc021oob.1	-19302	ENSG00000266150	MIR4711	microRNA 4711
chr1	61287873	61288435	563	*	MACS_peak_279	59.61	Intron (uc001czt.1/uc001czt.1, intron 1 of 5)	1	61542946	61928460	385515	1	4774	uc001czy.3	-254511	ENSG00000162599	NFIA	nuclear factor I A
chr1	61436372	61436753	382	*	MACS_peak_281	66.25	Exon (uc001czu.3/uc001czu.3, exon 1 of 7)	1	61542946	61928460	385515	1	4774	uc001czy.3	-106193	ENSG00000162599	NFIA	nuclear factor I A
chr1	61542675	61543201	527	*	MACS_peak_282	78.92	Promoter (<=1kb)	1	61542946	61928460	385515	1	4774	uc001czy.3	0	ENSG00000162599	NFIA	nuclear factor I A
chr1	61752905	61753825	921	*	MACS_peak_283	75.62	Intron (uc001czy.3/4774, intron 3 of 10)	1	61869748	61928460	58713	1	4774	uc001czx.3	-115923	ENSG00000162599	NFIA	nuclear factor I A
chr1	61869544	61870359	816	*	MACS_peak_284	80.9	Promoter (<=1kb)	1	61869748	61928460	58713	1	4774	uc001czx.3	0	ENSG00000162599	NFIA	nuclear factor I A
chr1	62765325	62766028	704	*	MACS_peak_286	70.1	Intron (uc001dah.4/163782, intron 1 of 9)	1	62701837	62785083	83247	2	163782	uc001dah.4	19055	ENSG00000132854	KANK4	KN motif and ankyrin repeat domains 4
chr1	62902178	62902806	629	*	MACS_peak_287	64.66	Promoter (<=1kb)	1	62902383	62917475	15093	1	7398	uc001dal.2	0	ENSG00000162607	USP1	ubiquitin specific peptidase 1
chr1	63142859	63143183	325	*	MACS_peak_288	102.78	Intron (uc001dan.4/85440, intron 1 of 48)	1	62920397	63154039	233643	2	85440	uc001dan.4	10856	ENSG00000116641	DOCK7	dedicator of cytokinesis 7
chr1	63261842	63262293	452	*	MACS_peak_290	56.42	Intron (uc001dat.3/84938, intron 1 of 10)	1	63249777	63330941	81165	1	84938	uc001dau.3	12065	ENSG00000125703	ATG4C	autophagy related 4C cysteine peptidase
chr1	63880235	63880800	566	*	MACS_peak_292	153.34	Intron (uc021oof.1/29929, intron 10 of 14)	1	63876817	63904233	27417	1	29929	uc010oox.2	3418	ENSG00000088035	ALG6	ALG6, alpha-1,3-glucosyltransferase
chr1	63916126	63916679	554	*	MACS_peak_293	60.07	Intron (uc001dba.2/23421, intron 7 of 8)	1	63876817	63904233	27417	1	29929	uc010oox.2	39309	ENSG00000088035	ALG6	ALG6, alpha-1,3-glucosyltransferase
chr1	63988729	63989220	492	*	MACS_peak_294	127.14	Promoter (<=1kb)	1	63906441	63988944	82504	2	23421	uc001dba.2	0	ENSG00000142856	ITGB3BP	integrin subunit beta 3 binding protein
chr1	64279215	64279831	617	*	MACS_peak_295	73.07	Intron (uc001dbi.4/4919, intron 1 of 6)	1	64239690	64647179	407490	1	4919	uc001dbj.3	39525	ENSG00000185483	ROR1	receptor tyrosine kinase like orphan receptor 1
chr1	64470135	64470790	656	*	MACS_peak_296	98.2	Intron (uc001dbi.4/4919, intron 1 of 6)	1	64669490	64710027	40538	1	148581	uc001dbn.1	-198700	ENSG00000177414	UBE2U	ubiquitin conjugating enzyme E2 U (putative)
chr1	64485421	64485975	555	*	MACS_peak_297	60.02	Intron (uc001dbi.4/4919, intron 2 of 6)	1	64669490	64710027	40538	1	148581	uc001dbn.1	-183515	ENSG00000177414	UBE2U	ubiquitin conjugating enzyme E2 U (putative)
chr1	64504653	64504959	307	*	MACS_peak_298	87.45	Intron (uc001dbi.4/4919, intron 2 of 6)	1	64669490	64710027	40538	1	148581	uc001dbn.1	-164531	ENSG00000177414	UBE2U	ubiquitin conjugating enzyme E2 U (putative)
chr1	64505169	64505688	520	*	MACS_peak_299	66.07	Intron (uc001dbi.4/4919, intron 2 of 6)	1	64669490	64710027	40538	1	148581	uc001dbn.1	-163802	ENSG00000177414	UBE2U	ubiquitin conjugating enzyme E2 U (putative)
chr1	64542904	64543476	573	*	MACS_peak_300	54.62	Intron (uc001dbi.4/4919, intron 4 of 6)	1	64669490	64710027	40538	1	148581	uc001dbn.1	-126014	ENSG00000177414	UBE2U	ubiquitin conjugating enzyme E2 U (putative)
chr1	64696734	64697223	490	*	MACS_peak_301	51.08	Intron (uc001dbn.1/148581, intron 6 of 8)	1	64669490	64710027	40538	1	148581	uc001dbn.1	27244	ENSG00000177414	UBE2U	ubiquitin conjugating enzyme E2 U (putative)
chr1	66444998	66445578	581	*	MACS_peak_305	75.59	Intron (uc001dcn.3/5142, intron 3 of 16)	1	66458390	66840262	381873	1	5142	uc001dcp.3	-12812	ENSG00000184588	PDE4B	phosphodiesterase 4B
chr1	66714422	66715002	581	*	MACS_peak_306	94.32	Intron (uc001dcn.3/5142, intron 4 of 16)	1	66797793	66840262	42470	1	5142	uc001dcq.3	-82791	ENSG00000184588	PDE4B	phosphodiesterase 4B
chr1	66737411	66738241	831	*	MACS_peak_307	69.04	Intron (uc001dcn.3/5142, intron 7 of 16)	1	66797793	66840262	42470	1	5142	uc001dcq.3	-59552	ENSG00000184588	PDE4B	phosphodiesterase 4B
chr1	66744275	66745033	759	*	MACS_peak_308	95.2	Intron (uc001dcn.3/5142, intron 7 of 16)	1	66797793	66840262	42470	1	5142	uc001dcq.3	-52760	ENSG00000184588	PDE4B	phosphodiesterase 4B
chr1	67170668	67171074	407	*	MACS_peak_310	56.1	Intron (uc001dcr.3/84251, intron 18 of 24)	1	67160377	67210768	50392	1	84251	uc001dcu.3	10291	ENSG00000118473	SGIP1	SH3 domain GRB2 like endophilin interacting protein 1
chr1	67636159	67636886	728	*	MACS_peak_311	51.6	Promoter (1-2kb)	1	67635025	67725650	90626	1	149233	uc010opn.2	1134	ENSG00000162594	IL23R	interleukin 23 receptor
chr1	67722880	67723270	391	*	MACS_peak_312	53.81	Intron (uc009waz.3/149233, intron 10 of 10)	1	67673299	67725650	52352	1	149233	uc001ddt.3	49581	ENSG00000162594	IL23R	interleukin 23 receptor
chr1	68152322	68152893	572	*	MACS_peak_314	53.1	Promoter (1-2kb)	1	68150860	68154021	3162	1	1647	uc009wbd.2	1462	ENSG00000116717	GADD45A	growth arrest and DNA damage inducible alpha
chr1	68297397	68298523	1127	*	MACS_peak_315	116.47	Promoter (<=1kb)	1	68297971	68668670	370700	1	100289178	uc001deb.2	0	ENSG00000232284	GNG12-AS1	GNG12 antisense RNA 1
chr1	68313070	68313511	442	*	MACS_peak_316	58.31	Intron (uc001deb.2/100289178, intron 1 of 9)	1	68167149	68299155	132007	2	55970	uc001dea.2	-13915	ENSG00000172380	GNG12	G protein subunit gamma 12
chr1	68573524	68573815	292	*	MACS_peak_317	77.72	Intron (uc001deb.2/100289178, intron 6 of 9)	1	68511645	68516481	4837	2	9077	uc001ded.3	-57043	ENSG00000162595	DIRAS3	DIRAS family GTPase 3
chr1	68697809	68698414	606	*	MACS_peak_318	128.11	Promoter (<=1kb)	1	68564142	68698284	134143	2	79971	uc001dee.3	0	ENSG00000116729	WLS	wntless Wnt ligand secretion mediator
chr1	68962692	68963053	362	*	MACS_peak_319	66.37	Promoter (<=1kb)	1	68939835	68962799	22965	2	55635	uc001del.4	0	ENSG00000024526	DEPDC1	DEP domain containing 1
chr1	70137121	70137607	487	*	MACS_peak_321	63.42	Intron (uc001deo.1/57554, intron 1 of 7)	1	70225858	70589171	363314	1	57554	uc001dep.3	-88251	ENSG00000033122	LRRC7	leucine rich repeat containing 7
chr1	70141277	70141863	587	*	MACS_peak_322	53.89	Intron (uc001deo.1/57554, intron 1 of 7)	1	70225858	70589171	363314	1	57554	uc001dep.3	-83995	ENSG00000033122	LRRC7	leucine rich repeat containing 7
chr1	70503754	70504162	409	*	MACS_peak_323	53.39	Promoter (1-2kb)	1	70502127	70589171	87045	1	57554	uc001deq.3	1627	ENSG00000033122	LRRC7	leucine rich repeat containing 7
chr1	70622147	70622662	516	*	MACS_peak_324	78.39	Intron (uc001der.2/55631, intron 10 of 14)	1	70610485	70671361	60877	2	55631	uc001der.2	48699	ENSG00000066557	LRRC40	leucine rich repeat containing 40
chr1	74530669	74530998	330	*	MACS_peak_330	73.24	Intron (uc001dfy.4/127255, intron 6 of 7)	1	74491702	74663871	172170	2	127255	uc001dfy.4	132873	ENSG00000162620	LRRIQ3	leucine rich repeats and IQ motif containing 3
chr1	76307386	76307845	460	*	MACS_peak_331	50.51	Intron (uc001dhd.2/4438, intron 7 of 19)	1	76262556	76378923	116368	1	4438	uc001dhd.2	44830	ENSG00000057468	MSH4	mutS homolog 4
chr1	76539280	76539637	358	*	MACS_peak_332	68.19	Promoter (<=1kb)	1	76540389	77042892	502504	1	256435	uc001dhg.4	-752	ENSG00000184005	ST6GALNAC3	ST6 N-acetylgalactosaminide alpha-2,6-sialyltransferase 3
chr1	76613684	76614052	369	*	MACS_peak_333	151.65	Intron (uc001dhg.4/256435, intron 1 of 3)	1	76540389	77096669	556281	1	256435	uc010orh.1	73295	ENSG00000184005	ST6GALNAC3	ST6 N-acetylgalactosaminide alpha-2,6-sialyltransferase 3
chr1	76705017	76705557	541	*	MACS_peak_334	62.71	Intron (uc001dhg.4/256435, intron 1 of 3)	1	76540389	77096669	556281	1	256435	uc010orh.1	164628	ENSG00000184005	ST6GALNAC3	ST6 N-acetylgalactosaminide alpha-2,6-sialyltransferase 3
chr1	76717702	76718177	476	*	MACS_peak_335	58.45	Intron (uc001dhg.4/256435, intron 1 of 3)	1	76540389	77096669	556281	1	256435	uc010orh.1	177313	ENSG00000184005	ST6GALNAC3	ST6 N-acetylgalactosaminide alpha-2,6-sialyltransferase 3
chr1	78070757	78071722	966	*	MACS_peak_338	123.69	Intron (uc001dhp.3/26009, intron 1 of 10)	1	78030190	78099090	68901	2	26009	uc001dhp.3	27368	ENSG00000036549	ZZZ3	zinc finger ZZ-type containing 3
chr1	78148385	78149031	647	*	MACS_peak_339	68.51	Promoter (<=1kb)	1	78050202	78148343	98142	2	26009	uc009wbz.1	-42	ENSG00000036549	ZZZ3	zinc finger ZZ-type containing 3
chr1	78262420	78262902	483	*	MACS_peak_340	91.57	Intron (uc001dhx.4/374986, intron 2 of 15)	1	78268955	78327860	58906	1	374986	uc001dhy.1	-6053	ENSG00000180488	MIGA1	mitoguardin 1
chr1	78744273	78744964	692	*	MACS_peak_341	68.06	Intron (uc001dil.1/149047, intron 3 of 5)	1	78695283	78835147	139865	1	149047	uc009wcc.3	48990	ENSG00000237413	MGC27382	uncharacterized MGC27382
chr1	81837542	81838197	656	*	MACS_peak_344	80.3	Intron (uc001dis.3/23266, intron 1 of 8)	1	81771845	82458107	686263	1	23266	uc001dis.3	65697	ENSG00000117114	ADGRL2	adhesion G protein-coupled receptor L2
chr1	86146698	86147073	376	*	MACS_peak_349	63.51	Intron (uc001dlh.3/54680, intron 5 of 9)	1	86115106	86174116	59011	2	54680	uc001dlh.3	27043	ENSG00000117174	ZNHIT6	zinc finger HIT-type containing 6
chr1	86952741	86953217	477	*	MACS_peak_351	80.34	Intron (uc001dls.1/1179, intron 7 of 10)	1	86934395	86965974	31580	1	1179	uc001dlt.3	18346	ENSG00000016490	CLCA1	chloride channel accessory 1
chr1	87620576	87621830	1255	*	MACS_peak_352	155.08	Intron (uc001dme.2/339524, intron 7 of 7)	1	87597609	87602352	4744	1	339524	uc010oso.2	22967	ENSG00000267272	LINC01140	long intergenic non-protein coding RNA 1140
chr1	87634715	87635484	770	*	MACS_peak_353	72.81	3' UTR	1	87597609	87602352	4744	1	339524	uc010oso.2	37106	ENSG00000267272	LINC01140	long intergenic non-protein coding RNA 1140
chr1	89357040	89357520	481	*	MACS_peak_355	95.15	Promoter (<=1kb)	1	89318321	89357301	38981	2	2959	uc001dmo.4	0	ENSG00000137947	GTF2B	general transcription factor IIB
chr1	89634781	89635479	699	*	MACS_peak_357	73.33	Intron (uc001dna.2/388646, intron 2 of 10)	1	89597434	89641723	44290	2	388646	uc001dna.2	6244	ENSG00000213512	GBP7	guanylate binding protein 7
chr1	90023259	90023749	491	*	MACS_peak_358	51.49	Promoter (<=1kb)	1	90024270	90063420	39151	1	23507	uc001dnj.3	-521	ENSG00000197147	LRRC8B	leucine rich repeat containing 8 VRAC subunit B
chr1	91852633	91853298	666	*	MACS_peak_363	1564.89	Intron (uc001doa.4/164045, intron 4 of 38)	1	91843000	91866666	23667	2	164045	uc001doc.1	13368	ENSG00000162669	HFM1	HFM1, ATP dependent DNA helicase homolog
chr1	93346810	93347416	607	*	MACS_peak_367	121.54	Intron (uc001dpc.3/388650, intron 1 of 4)	1	93307717	93342707	34991	2	388650	uc021opu.1	-4103	ENSG00000154511	FAM69A	family with sequence similarity 69 member A
chr1	94018468	94018940	473	*	MACS_peak_370	77	3' UTR	1	94009664	94020218	10555	1	54874	uc010otl.2	8804	ENSG00000137942	FNBP1L	formin binding protein 1 like
chr1	94032552	94033541	990	*	MACS_peak_371	63.8	Exon (uc001dpx.5/8412, exon 6 of 8)	1	94027343	94050719	23377	2	8412	uc001dpx.5	17178	ENSG00000137936	BCAR3	BCAR3, NSP family adaptor protein
chr1	94273326	94273662	337	*	MACS_peak_372	62.66	Intron (uc001dqb.4/8412, intron 2 of 13)	1	94312388	94312467	80	1	100126348	uc021oqa.1	-38726	ENSG00000211575	MIR760	microRNA 760
chr1	94511270	94511608	339	*	MACS_peak_373	53.81	3' UTR	1	94475933	94484228	8296	2	24	uc009wdp.1	-27042	ENSG00000198691	ABCA4	ATP binding cassette subfamily A member 4
chr1	95298677	95299360	684	*	MACS_peak_375	51.16	Intron (uc001dqv.5/126969, intron 5 of 14)	1	95292995	95356823	63829	1	126969	uc010otu.1	5682	ENSG00000143036	SLC44A3	solute carrier family 44 member 3
chr1	95319822	95320226	405	*	MACS_peak_376	92.47	Intron (uc001dqv.5/126969, intron 9 of 14)	1	95292995	95356823	63829	1	126969	uc010otu.1	26827	ENSG00000143036	SLC44A3	solute carrier family 44 member 3
chr1	95393110	95393559	450	*	MACS_peak_377	53.63	Promoter (<=1kb)	1	95393584	95428826	35243	1	729970	uc021oqc.2	-25	ENSG00000235501	LOC729970	hCG2028352-like
chr1	95661472	95661972	501	*	MACS_peak_378	135.08	3' UTR	1	95699711	95710509	10799	1	100527978	uc009wdt.3	-37739	ENSG00000271092	TMEM56-RWDD3	TMEM56-RWDD3 readthrough
chr1	95693230	95693574	345	*	MACS_peak_379	69.3	Intron (uc001drd.4/100527978, intron 6 of 7)	1	95699711	95710509	10799	1	100527978	uc009wdt.3	-6137	ENSG00000271092	TMEM56-RWDD3	TMEM56-RWDD3 readthrough
chr1	97877796	97878285	490	*	MACS_peak_382	59.58	Intron (uc001drv.3/1806, intron 14 of 22)	1	97561479	97788511	227033	1	100873932	uc031pne.1	316317	ENSG00000232878	DPYD-AS1	DPYD antisense RNA 1
chr1	97922797	97923308	512	*	MACS_peak_383	53.35	Intron (uc001drv.3/1806, intron 13 of 22)	1	97561479	97788511	227033	1	100873932	uc031pne.1	361318	ENSG00000232878	DPYD-AS1	DPYD antisense RNA 1
chr1	99440668	99441174	507	*	MACS_peak_385	130.83	Intron (uc001dsb.3/163404, intron 1 of 5)	1	99469832	99614408	144577	1	100129620	uc001dsd.1	-28658	ENSG00000232825	LOC100129620	uncharacterized LOC100129620
chr1	100817090	100817636	547	*	MACS_peak_388	71.69	Promoter (<=1kb)	1	100818023	100856616	38594	1	8556	uc009wec.1	-387	ENSG00000079335	CDC14A	cell division cycle 14A
chr1	101491481	101491937	457	*	MACS_peak_389	62.56	Promoter (<=1kb)	1	101455180	101491644	36465	2	51611	uc001dtz.2	0	ENSG00000117543	DPH5	diphthamide biosynthesis 5
chr1	107858067	107858437	371	*	MACS_peak_396	63.86	Intron (uc001dvc.4/22854, intron 2 of 5)	1	107937776	108024475	86700	1	22854	uc001dve.3	-79339	ENSG00000162631	NTNG1	netrin G1
chr1	108240466	108241365	900	*	MACS_peak_399	86.43	Intron (uc001dvk.1/10451, intron 17 of 26)	1	108113782	108231126	117345	2	10451	uc010ouv.1	-9340	ENSG00000134215	VAV3	vav guanine nucleotide exchange factor 3
chr1	108281704	108282360	657	*	MACS_peak_400	147.54	Intron (uc001dvk.1/10451, intron 15 of 26)	1	108113782	108231126	117345	2	10451	uc010ouv.1	-50578	ENSG00000134215	VAV3	vav guanine nucleotide exchange factor 3
chr1	108684300	108684637	338	*	MACS_peak_401	56.41	Intron (uc001dvm.4/29957, intron 8 of 9)	1	108677344	108735431	58088	2	29957	uc001dvm.4	50794	ENSG00000085491	SLC25A24	solute carrier family 25 member 24
chr1	109189090	109189583	494	*	MACS_peak_403	57.62	Downstream (1-2kb)	1	109190910	109203744	12835	2	113802	uc001dvt.4	14161	ENSG00000162639	HENMT1	HEN methyltransferase 1
chr1	109235338	109235655	318	*	MACS_peak_404	69.3	Promoter (<=1kb)	1	109234932	109244422	9491	1	55119	uc010ouz.2	406	ENSG00000134186	PRPF38B	pre-mRNA processing factor 38B
chr1	109358893	109359279	387	*	MACS_peak_405	56.72	Exon (uc001dwa.4/254268, exon 16 of 16)	1	109358520	109399726	41207	2	254268	uc001dwa.4	40447	ENSG00000162641	AKNAD1	AKNA domain containing 1
chr1	109406128	109406590	463	*	MACS_peak_406	50.35	Intron (uc010ovb.3/254268, intron 1 of 11)	1	109358520	109400864	42345	2	254268	uc001dwb.4	-5264	ENSG00000162641	AKNAD1	AKNA domain containing 1
chr1	109780135	109780552	418	*	MACS_peak_408	50.52	3' UTR	1	109792641	109818378	25738	1	1952	uc001dxa.4	-12089	ENSG00000143126	CELSR2	cadherin EGF LAG seven-pass G-type receptor 2
chr1	109817059	109817841	783	*	MACS_peak_409	113.59	3' UTR	1	109822176	109825041	2866	2	84722	uc001dxb.3	7200	ENSG00000134222	PSRC1	proline and serine rich coiled-coil 1
chr1	109841716	109842147	432	*	MACS_peak_410	52.67	Intron (uc001dxk.1/343263, intron 1 of 8)	1	109834987	109849663	14677	2	343263	uc001dxk.1	7516	ENSG00000221986	MYBPHL	myosin binding protein H like
chr1	109941876	109942260	385	*	MACS_peak_411	87.3	Promoter (1-2kb)	1	109852188	109940563	88376	2	6272	uc001dxm.2	-1313	ENSG00000134243	SORT1	sortilin 1
chr1	109968658	109969448	791	*	MACS_peak_412	55.92	Promoter (<=1kb)	1	109941653	109969070	27418	2	5686	uc001dxn.3	0	ENSG00000143106	PSMA5	proteasome subunit alpha 5
chr1	110198403	110198898	496	*	MACS_peak_413	66.37	Promoter (<=1kb)	1	110198698	110217908	19211	1	2946	uc001dyi.3	0	ENSG00000213366	GSTM2	glutathione S-transferase mu 2
chr1	110730712	110731544	833	*	MACS_peak_419	77.48	Intron (uc009wfq.3/388662, intron 6 of 11)	1	110735128	110737566	2439	1	388662	uc001dze.1	-3584	ENSG00000197106	SLC6A17	solute carrier family 6 member 17
chr1	110881310	110881975	666	*	MACS_peak_420	132.67	Promoter (<=1kb)	1	110828999	110881793	52795	2	440600	uc001dzj.3	0	ENSG00000227963	RBM15-AS1	RBM15 antisense RNA 1
chr1	110949914	110950651	738	*	MACS_peak_421	138.28	Promoter (<=1kb)	1	110950431	110958896	8466	1	101410535	uc031pnm.1	0	NA	LAMTOR5-AS1	LAMTOR5 antisense RNA 1
chr1	110955183	110955516	334	*	MACS_peak_422	82.5	Intron (uc031pnm.1/101410535, intron 2 of 2)	1	110943877	110950546	6670	2	10542	uc001dzr.3	-4637	ENSG00000134248	LAMTOR5	late endosomal/lysosomal adaptor, MAPK and MTOR activator 5
chr1	111888966	111889407	442	*	MACS_peak_426	60.79	Promoter (<=1kb)	1	111889195	111895639	6445	1	128344	uc001eaw.2	0	ENSG00000173947	PIFO	primary cilia formation
chr1	112050837	112051398	562	*	MACS_peak_427	51.55	Intron (uc001ebg.4/140, intron 1 of 5)	1	112042051	112046743	4693	2	140	uc001ebh.4	-4094	ENSG00000282608	ADORA3	adenosine A3 receptor
chr1	112297855	112298618	764	*	MACS_peak_428	164.23	Promoter (<=1kb)	1	112298190	112310199	12010	1	11218	uc001ebs.3	0	ENSG00000064703	DDX20	DEAD-box helicase 20
chr1	113065304	113065621	318	*	MACS_peak_429	66.25	Downstream (<1kb)	1	113051370	113063910	12541	1	7482	uc001ecb.3	13934	ENSG00000134245	WNT2B	Wnt family member 2B
chr1	113383234	113383689	456	*	MACS_peak_432	64.1	Intron (uc001ecw.1/uc001ecw.1, intron 2 of 6)	1	113465972	113467295	1324	1	246182	uc001eda.1	-82283	NA	AKR7A2P1	aldo-keto reductase family 7 member A2 pseudogene 1
chr1	113615332	113615655	324	*	MACS_peak_433	123.12	Promoter (<=1kb)	1	113615831	113667342	51512	1	9860	uc001edf.1	-176	ENSG00000198799	LRIG2	leucine rich repeats and immunoglobulin like domains 2
chr1	114165207	114165624	418	*	MACS_peak_434	61.68	Exon (uc001edh.3/260425, exon 10 of 22)	1	114133106	114228545	95440	1	260425	uc001edj.3	32101	ENSG00000081026	MAGI3	membrane associated guanylate kinase, WW and PDZ domain containing 3
chr1	114656302	114656786	485	*	MACS_peak_435	60.86	Intron (uc021orz.1/148281, intron 3 of 7)	1	114631914	114641887	9974	2	148281	uc001eeu.3	-14415	ENSG00000134207	SYT6	synaptotagmin 6
chr1	115000642	115001217	576	*	MACS_peak_437	153.1	Intron (uc010ows.2/51592, intron 2 of 18)	1	114935399	115006178	70780	2	51592	uc010ows.2	4961	ENSG00000197323	TRIM33	tripartite motif containing 33
chr1	115124138	115124477	340	*	MACS_peak_438	116.13	Promoter (<=1kb)	1	115110181	115124265	14085	2	10286	uc001efa.3	0	ENSG00000116752	BCAS2	BCAS2, pre-mRNA processing factor
chr1	116199245	116199680	436	*	MACS_peak_441	130.61	Intron (uc001efv.1/81839, intron 2 of 7)	1	116185250	116240845	55596	1	81839	uc021ose.1	13995	ENSG00000173218	VANGL1	VANGL planar cell polarity protein 1
chr1	116222493	116223385	893	*	MACS_peak_442	69.97	Intron (uc001efv.1/81839, intron 4 of 7)	1	116185250	116240845	55596	1	81839	uc021ose.1	37243	ENSG00000173218	VANGL1	VANGL planar cell polarity protein 1
chr1	116270600	116271021	422	*	MACS_peak_443	122.84	Intron (uc001efx.4/845, intron 5 of 10)	1	116242626	116311426	68801	2	845	uc001efx.4	40405	ENSG00000118729	CASQ2	calsequestrin 2
chr1	116920521	116921295	775	*	MACS_peak_445	53.72	Intron (uc010owv.1/476, intron 1 of 21)	1	116916489	116947396	30908	1	476	uc010oww.2	4032	ENSG00000163399	ATP1A1	ATPase Na+/K+ transporting subunit alpha 1
chr1	117714256	117715198	943	*	MACS_peak_450	188.68	Intron (uc021osn.1/79679, intron 1 of 5)	1	117686209	117746458	60250	2	79679	uc021osn.1	31260	ENSG00000134258	VTCN1	V-set domain containing T-cell activation inhibitor 1
chr1	118156495	118156957	463	*	MACS_peak_451	65.22	Intron (uc001ehe.3/54855, intron 1 of 1)	1	118148604	118171011	22408	1	54855	uc001ehe.3	7891	ENSG00000183508	FAM46C	family with sequence similarity 46 member C
chr1	118494897	118495434	538	*	MACS_peak_453	55.42	Exon (uc010oxe.1/10885, exon 18 of 27)	1	118472372	118503049	30678	1	10885	uc010oxe.1	22525	ENSG00000065183	WDR3	WD repeat domain 3
chr1	118640058	118640507	450	*	MACS_peak_454	69.05	Exon (uc001ehk.2/200162, exon 7 of 49)	1	118584426	118623942	39517	2	200162	uc021oss.1	-16116	ENSG00000155761	SPAG17	sperm associated antigen 17
chr1	119683021	119683731	711	*	MACS_peak_457	60.64	Promoter (<=1kb)	1	119573839	119683295	109457	2	10352	uc001ehm.3	0	ENSG00000116874	WARS2	tryptophanyl tRNA synthetase 2, mitochondrial
chr1	120138129	120138630	502	*	MACS_peak_460	104.6	Downstream (1-2kb)	1	120140325	120141914	1590	2	644242	uc021osv.1	3284	ENSG00000260941	LINC00622	long intergenic non-protein coding RNA 622
chr1	120178493	120179246	754	*	MACS_peak_461	57.65	Intron (uc001ehy.1/90874, intron 1 of 2)	1	120162000	120190390	28391	2	90874	uc001ehy.1	11144	ENSG00000143067	ZNF697	zinc finger protein 697
chr1	120188528	120189112	585	*	MACS_peak_462	62	Promoter (1-2kb)	1	120162000	120190390	28391	2	90874	uc001ehy.1	1278	ENSG00000143067	ZNF697	zinc finger protein 697
chr1	120275007	120275936	930	*	MACS_peak_463	110.47	Intron (uc009whl.3/26227, intron 6 of 6)	1	120262250	120286849	24600	1	26227	uc001eib.3	12757	ENSG00000092621	PHGDH	phosphoglycerate dehydrogenase
chr1	120504923	120505224	302	*	MACS_peak_464	56.72	Intron (uc001eik.3/4853, intron 11 of 33)	1	120436156	120439147	2992	2	11085	uc001eij.3	-65776	ENSG00000134249	ADAM30	ADAM metallopeptidase domain 30
chr1	144009703	144010355	653	*	MACS_peak_469	50.32	Intron (uc010oxm.1/uc010oxm.1, intron 1 of 3)	1	143896452	143913143	16692	2	728833	uc010evy.1	-96560	ENSG00000215784	FAM72D	family with sequence similarity 72 member D
chr1	144866726	144867060	335	*	MACS_peak_470	146.53	Promoter (1-2kb)	1	144862708	144868172	5465	2	9659	uc001ema.3	1112	ENSG00000178104	PDE4DIP	phosphodiesterase 4D interacting protein
chr1	144990549	144990999	451	*	MACS_peak_471	131.5	Intron (uc021ott.2/100288142, intron 53 of 131)	1	144676437	144995033	318597	2	653513	uc001elk.2	4034	ENSG00000178104	LOC653513	phosphodiesterase 4D interacting protein-like
chr1	145014910	145015539	630	*	MACS_peak_472	83.67	Intron (uc021ott.2/100288142, intron 53 of 131)	1	144951761	144997111	45351	2	9659	uc021ouj.1	-17799	ENSG00000178104	PDE4DIP	phosphodiesterase 4D interacting protein
chr1	145039310	145040400	1091	*	MACS_peak_473	97.48	Promoter (<=1kb)	1	144676437	145039992	363556	2	653513	uc001elm.4	0	ENSG00000178104	LOC653513	phosphodiesterase 4D interacting protein-like
chr1	145091851	145092843	993	*	MACS_peak_474	114.11	Intron (uc021ott.2/100288142, intron 53 of 131)	1	145096407	145116997	20591	1	9554	uc031poa.1	-3564	ENSG00000265808	SEC22B	SEC22 homolog B, vesicle trafficking protein (gene/pseudogene)
chr1	145114514	145114861	348	*	MACS_peak_475	59.31	Intron (uc021ott.2/100288142, intron 53 of 131)	1	145096407	145116997	20591	1	9554	uc031poa.1	18107	ENSG00000265808	SEC22B	SEC22 homolog B, vesicle trafficking protein (gene/pseudogene)
chr1	145395638	145396225	588	*	MACS_peak_476	50.56	Intron (uc021ott.2/100288142, intron 99 of 131)	1	145413191	145417545	4355	1	148738	uc001eni.2	-16966	ENSG00000168509	HFE2	hemochromatosis type 2 (juvenile)
chr1	145438021	145438640	620	*	MACS_peak_477	75.16	Promoter (<=1kb)	1	145438462	145442628	4167	1	10628	uc001enn.4	0	ENSG00000265972	TXNIP	thioredoxin interacting protein
chr1	145516019	145516468	450	*	MACS_peak_478	53.45	Promoter (<=1kb)	1	145516165	145523732	7568	1	8799	uc001eny.2	0	ENSG00000131779	PEX11B	peroxisomal biogenesis factor 11 beta
chr1	145542336	145543181	846	*	MACS_peak_479	117.14	3' UTR	1	145549209	145563099	13891	1	148741	uc010oyx.1	-6028	ENSG00000198483	ANKRD35	ankyrin repeat domain 35
chr1	145610393	145611286	894	*	MACS_peak_480	80.42	Promoter (<=1kb)	1	145592605	145610627	18023	2	10623	uc001eog.3	0	ENSG00000186141	POLR3C	RNA polymerase III subunit C
chr1	146643852	146644548	697	*	MACS_peak_481	51.61	Promoter (<=1kb)	1	146626685	146644129	17445	2	5565	uc001epe.3	0	ENSG00000131791	PRKAB2	protein kinase AMP-activated non-catalytic subunit beta 2
chr1	148241603	148242159	557	*	MACS_peak_483	54.56	Intron (uc001eqe.3/728841, intron 1 of 13)	1	148011680	148258489	246810	2	25832	uc021owf.2	16330	ENSG00000270629	NBPF14	NBPF member 14
chr1	148556437	148556929	493	*	MACS_peak_484	70.68	Promoter (1-2kb)	1	148558188	148596267	38080	1	284565	uc001esb.2	-1259	ENSG00000266338	NBPF15	NBPF member 15
chr1	149917071	149917446	376	*	MACS_peak_486	63.51	Intron (uc001etn.3/56957, intron 11 of 11)	1	149907192	149908791	1600	2	10903	uc010pbo.1	-8280	ENSG00000014914	MTMR11	myotubularin related protein 11
chr1	149978619	149979161	543	*	MACS_peak_487	97.61	Intron (uc001etn.3/56957, intron 1 of 11)	1	149912232	149982686	70455	2	56957	uc001etn.3	3525	ENSG00000264522	OTUD7B	OTU deubiquitinase 7B
chr1	150207948	150208587	640	*	MACS_peak_488	107.36	Promoter (<=1kb)	1	150190717	150208504	17788	2	81611	uc001etw.3	0	ENSG00000143401	ANP32E	acidic nuclear phosphoprotein 32 family member E
chr1	150231567	150232134	568	*	MACS_peak_489	68.67	Promoter (1-2kb)	1	150230218	150237480	7263	1	23632	uc001etx.3	1349	ENSG00000118298	CA14	carbonic anhydrase 14
chr1	150254155	150255108	954	*	MACS_peak_490	149.66	Promoter (<=1kb)	1	150254953	150259501	4549	1	148523	uc001euh.3	0	ENSG00000159208	CIART	circadian associated repressor of transcription
chr1	150293724	150294204	481	*	MACS_peak_491	69.13	Promoter (<=1kb)	1	150293928	150301344	7417	1	9129	uc009wlo.3	0	ENSG00000117360	PRPF3	pre-mRNA processing factor 3
chr1	151226752	151227356	605	*	MACS_peak_493	84.14	Promoter (<=1kb)	1	151227197	151239954	12758	1	5710	uc001exl.3	0	ENSG00000159352	PSMD4	proteasome 26S subunit, non-ATPase 4
chr1	151253762	151254266	505	*	MACS_peak_494	52.3	Promoter (<=1kb)	1	151254094	151260882	6789	1	57592	uc001exp.1	0	ENSG00000143373	ZNF687	zinc finger protein 687
chr1	151267605	151267838	234	*	MACS_peak_495	89.63	Intron (uc001exr.3/5298, intron 10 of 12)	1	151258751	151264381	5631	1	57592	uc009wmp.3	8854	ENSG00000143373	ZNF687	zinc finger protein 687
chr1	151378395	151379341	947	*	MACS_peak_496	131.41	Exon (uc021oyq.1/23126, exon 16 of 17)	1	151372041	151374412	2372	1	5692	uc001eyc.1	6354	ENSG00000159377	PSMB4	proteasome subunit beta 4
chr1	151811916	151812833	918	*	MACS_peak_497	101	Promoter (<=1kb)	1	151810339	151813033	2695	2	100191040	uc010pdq.1	200	ENSG00000225556	C2CD4D	C2 calcium dependent domain containing 4D
chr1	151881900	151882543	644	*	MACS_peak_498	106.68	Promoter (<=1kb)	1	151843343	151882361	39019	2	117145	uc001ezj.2	0	ENSG00000159445	THEM4	thioesterase superfamily member 4
chr1	152878281	152878729	449	*	MACS_peak_503	51.1	Promoter (2-3kb)	1	152881039	152884362	3324	1	3713	uc001fau.3	-2310	ENSG00000163207	IVL	involucrin
chr1	153521833	153522248	416	*	MACS_peak_504	71.28	Promoter (<=1kb)	1	153519809	153521734	1926	2	6274	uc001fca.1	-99	ENSG00000188015	S100A3	S100 calcium binding protein A3
chr1	153538992	153539487	496	*	MACS_peak_505	119.91	Promoter (<=1kb)	1	153533585	153538306	4722	2	6273	uc001fcb.3	-686	ENSG00000196754	S100A2	S100 calcium binding protein A2
chr1	153736082	153736500	419	*	MACS_peak_506	89.8	Promoter (2-3kb)	1	153738951	153746555	7605	1	65123	uc001fcx.3	-2451	ENSG00000143624	INTS3	integrator complex subunit 3
chr1	153853211	153853792	582	*	MACS_peak_507	67.1	Intron (uc001fdb.4/57459, intron 1 of 10)	1	153777203	153895451	118249	2	57459	uc001fdb.4	41659	ENSG00000143614	GATAD2B	GATA zinc finger domain containing 2B
chr1	153918018	153918748	731	*	MACS_peak_508	68.12	Promoter (<=1kb)	1	153901977	153919154	17178	2	9909	uc001fdd.1	406	ENSG00000198837	DENND4B	DENN domain containing 4B
chr1	154192793	154193591	799	*	MACS_peak_509	233.78	Promoter (<=1kb)	1	154179183	154193273	14091	2	25912	uc001feg.2	0	ENSG00000143612	C1orf43	chromosome 1 open reading frame 43
chr1	154392574	154393020	447	*	MACS_peak_510	135.48	Intron (uc021paf.1/3570, intron 1 of 6)	1	154377669	154441926	64258	1	3570	uc001ffa.2	14905	ENSG00000160712	IL6R	interleukin 6 receptor
chr1	154401485	154401842	358	*	MACS_peak_511	97.68	Exon (uc021paf.1/3570, exon 2 of 7)	1	154377669	154441926	64258	1	3570	uc001ffa.2	23816	ENSG00000160712	IL6R	interleukin 6 receptor
chr1	154531099	154531843	745	*	MACS_peak_513	248.63	Promoter (<=1kb)	1	154521051	154531120	10070	2	55585	uc001fff.1	0	ENSG00000160714	UBE2Q1	ubiquitin conjugating enzyme E2 Q1
chr1	154600233	154600677	445	*	MACS_peak_514	62.67	Promoter (<=1kb)	1	154554534	154600456	45923	2	103	uc001ffk.3	0	ENSG00000160710	ADAR	adenosine deaminase, RNA specific
chr1	155188635	155188950	316	*	MACS_peak_515	73.24	Promoter (<=1kb)	1	155183616	155188809	5194	2	2630	uc001fjd.3	0	ENSG00000160766	GBAP1	glucosylceramidase beta pseudogene 1
chr1	155213323	155214524	1202	*	MACS_peak_516	56.44	Promoter (<=1kb)	1	155204239	155214653	10415	2	2629	uc001fjk.3	129	ENSG00000177628	GBA	glucosylceramidase beta
chr1	155232005	155232347	343	*	MACS_peak_517	75.35	Promoter (<=1kb)	1	155225770	155232176	6407	2	10067	uc001fjs.3	0	ENSG00000116521	SCAMP3	secretory carrier membrane protein 3
chr1	155243033	155243504	472	*	MACS_peak_518	52.12	Promoter (<=1kb)	1	155232659	155243281	10623	2	1196	uc001fjw.3	0	ENSG00000176444	CLK2	CDC like kinase 2
chr1	155880663	155880989	327	*	MACS_peak_519	73.24	Promoter (<=1kb)	1	155867599	155880706	13108	2	6016	uc031pqc.1	0	ENSG00000143622	RIT1	Ras like without CAAX 1
chr1	156099946	156100665	720	*	MACS_peak_520	142.52	Exon (uc001fnf.1/4000, exon 5 of 13)	1	156096346	156109880	13535	1	4000	uc001fnk.3	3600	ENSG00000160789	LMNA	lamin A/C
chr1	156163291	156163804	514	*	MACS_peak_521	50.63	Promoter (<=1kb)	1	156163730	156182587	18858	1	9673	uc001fnp.3	0	ENSG00000160785	SLC25A44	solute carrier family 25 member 44
chr1	156186152	156186767	616	*	MACS_peak_522	184.94	Intron (uc009wru.2/11243, intron 1 of 6)	1	156182779	156209868	27090	1	11243	uc021pba.1	3373	ENSG00000160783	PMF1	polyamine modulated factor 1
chr1	156230748	156231228	481	*	MACS_peak_523	68.83	Exon (uc001foc.4/23381, exon 14 of 22)	1	156213112	156217908	4797	2	79957	uc031pqi.1	-12840	ENSG00000160781	PAQR6	progestin and adipoQ receptor family member 6
chr1	156252423	156253163	741	*	MACS_peak_524	62.06	Promoter (<=1kb)	1	156219015	156252620	33606	2	23381	uc001foc.4	0	ENSG00000198952	SMG5	SMG5, nonsense mediated mRNA decay factor
chr1	156265176	156265880	705	*	MACS_peak_525	91.53	Promoter (<=1kb)	1	156262478	156265480	3003	2	112770	uc001foh.4	0	ENSG00000198715	GLMP	glycosylated lysosomal membrane protein
chr1	156721343	156721777	435	*	MACS_peak_530	67.83	Promoter (<=1kb)	1	156711899	156721543	9645	2	3068	uc001fpy.4	0	ENSG00000143321	HDGF	heparin binding growth factor
chr1	156751287	156751618	332	*	MACS_peak_531	63.51	Intron (uc001fqa.3/5546, intron 1 of 6)	1	156737274	156770609	33336	1	5546	uc001fqa.3	14013	ENSG00000143294	PRCC	papillary renal cell carcinoma (translocation-associated)
chr1	157003873	157004446	574	*	MACS_peak_533	126.73	Intron (uc001fqn.3/9826, intron 1 of 40)	1	156904632	157015162	110531	2	9826	uc001fqn.3	10716	ENSG00000132694	ARHGEF11	Rho guanine nucleotide exchange factor 11
chr1	157010653	157011141	489	*	MACS_peak_534	70.57	Intron (uc001fqn.3/9826, intron 1 of 40)	1	156904632	157015162	110531	2	9826	uc001fqn.3	4021	ENSG00000132694	ARHGEF11	Rho guanine nucleotide exchange factor 11
chr1	157060456	157060890	435	*	MACS_peak_535	60.69	Downstream (<1kb)	1	157061835	157069600	7766	2	440695	uc001fqq.2	8710	ENSG00000253831	ETV3L	ETS variant 3 like
chr1	157962617	157963587	971	*	MACS_peak_537	74.76	Promoter (<=1kb)	1	157963063	158065844	102782	1	55243	uc001frn.4	0	ENSG00000183853	KIRREL1	kirre like nephrin family adhesion molecule 1
chr1	157972083	157973078	996	*	MACS_peak_538	84.74	Intron (uc001frn.4/55243, intron 1 of 14)	1	157963063	158065844	102782	1	55243	uc010pib.2	9020	ENSG00000183853	KIRREL1	kirre like nephrin family adhesion molecule 1
chr1	157979279	157980319	1041	*	MACS_peak_539	112.11	Intron (uc001frn.4/55243, intron 1 of 14)	1	157963063	158065844	102782	1	55243	uc010pib.2	16216	ENSG00000183853	KIRREL1	kirre like nephrin family adhesion molecule 1
chr1	158015482	158015930	449	*	MACS_peak_540	94.92	Intron (uc001frn.4/55243, intron 1 of 14)	1	158045903	158065844	19942	1	55243	uc009wsq.3	-29973	ENSG00000183853	KIRREL1	kirre like nephrin family adhesion molecule 1
chr1	158966294	158967184	891	*	MACS_peak_541	174.4	Promoter (2-3kb)	1	158969758	158988441	18684	1	3428	uc001ftf.1	-2574	ENSG00000163565	IFI16	interferon gamma inducible protein 16
chr1	158985239	158985717	479	*	MACS_peak_542	187.83	Promoter (<=1kb)	1	158984451	159024945	40495	1	3428	uc010pit.2	788	ENSG00000163565	IFI16	interferon gamma inducible protein 16
chr1	159774651	159775300	650	*	MACS_peak_546	55.68	Promoter (2-3kb)	1	159772210	159786047	13838	1	343413	uc009wta.3	2441	ENSG00000181036	FCRL6	Fc receptor like 6
chr1	160139027	160139716	690	*	MACS_peak_547	66.09	Promoter (2-3kb)	1	160136318	160156767	20450	1	480	uc001fvg.3	2709	ENSG00000132681	ATP1A4	ATPase Na+/K+ transporting subunit alpha 4
chr1	160594123	160594913	791	*	MACS_peak_549	64.42	Intron (uc001fwl.4/6504, intron 3 of 6)	1	160579891	160617081	37191	2	6504	uc001fwl.4	22168	ENSG00000117090	SLAMF1	signaling lymphocytic activation molecule family member 1
chr1	160607534	160608124	591	*	MACS_peak_550	69.34	Intron (uc001fwl.4/6504, intron 1 of 6)	1	160579891	160617081	37191	2	6504	uc001fwl.4	8957	ENSG00000117090	SLAMF1	signaling lymphocytic activation molecule family member 1
chr1	160807020	160807535	516	*	MACS_peak_551	61.18	Intron (uc001fxa.3/51744, intron 5 of 8)	1	160784210	160798045	13836	1	4063	uc001fwz.3	22810	ENSG00000122224	LY9	lymphocyte antigen 9
chr1	161067390	161067684	295	*	MACS_peak_552	58.73	Promoter (<=1kb)	1	161068151	161070138	1988	1	126823	uc001fxq.3	-467	ENSG00000162755	KLHDC9	kelch domain containing 9
chr1	161283806	161284437	632	*	MACS_peak_554	72.03	Promoter (<=1kb)	1	161284166	161334535	50370	1	6391	uc001gag.3	0	ENSG00000143252	SDHC	succinate dehydrogenase complex subunit C
chr1	161391532	161392187	656	*	MACS_peak_556	74.86	Exon (uc021pbz.1/uc021pbz.1, exon 1 of 1)	1	161334521	161337673	3153	2	257177	uc001gal.4	-53859	ENSG00000188931	CFAP126	cilia and flagella associated protein 126
chr1	161696829	161697191	363	*	MACS_peak_559	97.68	Promoter (1-2kb)	1	161695702	161697933	2232	1	127943	uc001gbn.4	1127	ENSG00000162746	FCRLB	Fc receptor like B
chr1	161968406	161968945	540	*	MACS_peak_560	50.43	Intron (uc001gbu.3/25903, intron 5 of 7)	1	161952982	161955022	2041	2	25903	uc001gbt.3	-13384	ENSG00000162745	OLFML2B	olfactomedin like 2B
chr1	162051218	162051526	309	*	MACS_peak_561	119.01	Intron (uc010pkr.1/9722, intron 1 of 7)	1	162039581	162339813	300233	1	9722	uc010pks.1	11637	ENSG00000198929	NOS1AP	nitric oxide synthase 1 adaptor protein
chr1	162131745	162132426	682	*	MACS_peak_562	51.33	Intron (uc010pkr.1/9722, intron 2 of 7)	1	162126897	162126972	76	1	100616386	uc021pdp.1	4848	ENSG00000266144	MIR4654	microRNA 4654
chr1	162183272	162183987	716	*	MACS_peak_563	117.12	Intron (uc010pkr.1/9722, intron 2 of 7)	1	162126897	162126972	76	1	100616386	uc021pdp.1	56375	ENSG00000266144	MIR4654	microRNA 4654
chr1	162274455	162274829	375	*	MACS_peak_564	73.14	Intron (uc010pkr.1/9722, intron 4 of 7)	1	162312336	162312430	95	1	693141	uc021pdr.1	-37507	ENSG00000207729	MIR556	microRNA 556
chr1	162660524	162661006	483	*	MACS_peak_565	68.68	Intron (uc001gcf.3/4921, intron 2 of 18)	1	162602228	162750247	148020	1	4921	uc001gcg.3	58296	ENSG00000162733	DDR2	discoidin domain receptor tyrosine kinase 2
chr1	162723065	162723507	443	*	MACS_peak_566	63.45	Intron (uc001gcf.3/4921, intron 5 of 18)	1	162760496	162782608	22113	1	51478	uc001gci.3	-36989	ENSG00000132196	HSD17B7	hydroxysteroid 17-beta dehydrogenase 7
chr1	163035754	163036266	513	*	MACS_peak_568	83.48	Promoter (2-3kb)	1	163038396	163046592	8197	1	5999	uc001gcl.4	-2130	ENSG00000117152	RGS4	regulator of G protein signaling 4
chr1	163291399	163291753	355	*	MACS_peak_569	53.81	Promoter (<=1kb)	1	163291723	163325553	33831	1	83540	uc001gcq.1	0	ENSG00000143228	NUF2	NUF2, NDC80 kinetochore complex component
chr1	165445915	165446217	303	*	MACS_peak_572	54.68	Exon (uc001gdc.2/400794, exon 7 of 7)	1	165406165	165414592	8428	2	6258	uc001gdb.2	-31323	ENSG00000143171	RXRG	retinoid X receptor gamma
chr1	165509026	165509781	756	*	MACS_peak_573	50.03	Promoter (<=1kb)	1	165462198	165508849	46652	2	400794	uc010pkx.2	-177	ENSG00000237463	LOC400794	uncharacterized LOC400794
chr1	165721562	165721780	219	*	MACS_peak_574	180.73	Intron (uc001gdj.5/54499, intron 4 of 6)	1	165693528	165738159	44632	2	54499	uc001gdj.5	16379	ENSG00000143183	TMCO1	transmembrane and coiled-coil domains 1
chr1	166808297	166808911	615	*	MACS_peak_576	65.31	Promoter (<=1kb)	1	166808724	166819948	11225	1	57645	uc010ple.1	0	ENSG00000143157	POGK	pogo transposable element derived with KRAB domain
chr1	166845318	166845971	654	*	MACS_peak_577	116.76	Promoter (<=1kb)	1	166825749	166845654	19906	2	117143	uc001gdw.3	0	ENSG00000152382	TADA1	transcriptional adaptor 1
chr1	167683738	167684495	758	*	MACS_peak_578	96.03	Exon (uc021pej.1/uc021pej.1, exon 1 of 1)	1	167691187	167743133	51947	1	9019	uc001gen.4	-6692	ENSG00000197965	MPZL1	myelin protein zero like 1
chr1	167724784	167725660	877	*	MACS_peak_579	65.39	Intron (uc001gen.4/9019, intron 1 of 3)	1	167734295	167761156	26862	1	9019	uc031prf.1	-8635	ENSG00000197965	MPZL1	myelin protein zero like 1
chr1	167754318	167754823	506	*	MACS_peak_580	63.14	Intron (uc001geo.3/9019, intron 5 of 5)	1	167734295	167761156	26862	1	9019	uc031prf.1	20023	ENSG00000197965	MPZL1	myelin protein zero like 1
chr1	169452519	169453149	631	*	MACS_peak_583	53.52	Promoter (2-3kb)	1	169433149	169455208	22060	2	10560	uc001gge.4	2059	ENSG00000117479	SLC19A2	solute carrier family 19 member 2
chr1	169680749	169681117	369	*	MACS_peak_584	53.81	Promoter (<=1kb)	1	169659806	169680843	21038	2	6402	uc001ggk.3	0	ENSG00000188404	SELL	selectin L
chr1	169763631	169764323	693	*	MACS_peak_585	63.11	Promoter (<=1kb)	1	169763871	169773526	9656	1	55732	uc001ggo.3	0	ENSG00000000460	C1orf112	chromosome 1 open reading frame 112
chr1	169970237	169971138	902	*	MACS_peak_586	73.05	Intron (uc010plx.2/22920, intron 3 of 12)	1	169890470	169995042	104573	2	22920	uc010plx.2	23904	ENSG00000075945	KIFAP3	kinesin associated protein 3
chr1	170118941	170119780	840	*	MACS_peak_587	63.18	Promoter (<=1kb)	1	170120519	170120603	85	1	100423010	uc021peq.1	-739	ENSG00000263390	MIR3119-2	microRNA 3119-2
chr1	170939498	170940034	537	*	MACS_peak_590	55.26	Intron (uc001ghg.3/80133, intron 7 of 14)	1	170904612	171033906	129295	1	80133	uc010plz.2	34886	ENSG00000117501	MROH9	maestro heat like repeat family member 9
chr1	171454410	171454750	341	*	MACS_peak_592	155.09	Promoter (<=1kb)	1	171454666	171484998	30333	1	23215	uc001ghq.1	0	ENSG00000117523	PRRC2C	proline rich coiled-coil 2C
chr1	171623299	171623713	415	*	MACS_peak_593	76.66	Promoter (1-2kb)	1	171604557	171621823	17267	2	4653	uc010pmk.2	-1476	ENSG00000034971	MYOC	myocilin
chr1	171624019	171624820	802	*	MACS_peak_594	50.71	Promoter (2-3kb)	1	171604557	171621823	17267	2	4653	uc010pmk.2	-2196	ENSG00000034971	MYOC	myocilin
chr1	171750618	171751155	538	*	MACS_peak_595	104.59	Promoter (<=1kb)	1	171750761	171766856	16096	1	51603	uc001ghz.3	0	ENSG00000010165	METTL13	methyltransferase like 13
chr1	173284324	173285012	689	*	MACS_peak_597	58.6	Intron (uc001gix.1/100506023, intron 2 of 2)	1	173152870	173176471	23602	2	7292	uc001giw.3	-107853	ENSG00000117586	TNFSF4	TNF superfamily member 4
chr1	173608338	173608611	274	*	MACS_peak_598	65.95	Intron (uc001gja.1/339416, intron 3 of 5)	1	173604661	173606272	1612	1	730159	uc021pez.1	3677	ENSG00000232113	TEX50	testis expressed 50
chr1	173793621	173794196	576	*	MACS_peak_599	58.22	Promoter (<=1kb)	1	173793797	173827682	33886	1	55157	uc001gjh.2	0	ENSG00000117593	DARS2	aspartyl-tRNA synthetase 2, mitochondrial
chr1	173837115	173837540	426	*	MACS_peak_600	50.97	Promoter (<=1kb)	1	173833039	173837125	4087	2	60674	uc001gjj.3	0	ENSG00000234741	GAS5	growth arrest specific 5 (non-protein coding)
chr1	173839048	173839842	795	*	MACS_peak_601	52.69	Promoter (1-2kb)	1	173837493	173855774	18282	1	84614	uc009wwp.1	1555	ENSG00000185278	ZBTB37	zinc finger and BTB domain containing 37
chr1	174367061	174367894	834	*	MACS_peak_603	63.46	Intron (uc001gjw.3/9910, intron 13 of 13)	1	174417212	174418683	1472	1	9293	uc001gka.1	-49318	ENSG00000203737	GPR52	G protein-coupled receptor 52
chr1	174768779	174769193	415	*	MACS_peak_604	58.54	Promoter (<=1kb)	1	174769035	174964445	195411	1	9910	uc001gke.4	0	ENSG00000152061	RABGAP1L	RAB GTPase activating protein 1 like
chr1	174968341	174969306	966	*	MACS_peak_605	136.06	Promoter (<=1kb)	1	174968571	174981163	12593	1	27101	uc001gki.1	0	ENSG00000116161	CACYBP	calcyclin binding protein
chr1	174992089	174992978	890	*	MACS_peak_606	116.84	Promoter (<=1kb)	1	174982094	174992591	10498	2	63931	uc001gkk.3	0	ENSG00000120333	MRPS14	mitochondrial ribosomal protein S14
chr1	175149298	175149751	454	*	MACS_peak_608	65.78	Intron (uc001gkn.3/9674, intron 1 of 2)	1	175126123	175161949	35827	2	9674	uc001gkn.3	12198	ENSG00000235750	KIAA0040	KIAA0040
chr1	178207988	178208290	303	*	MACS_peak_611	56.63	Intron (uc009wxb.2/9462, intron 1 of 4)	1	178310606	178448648	138043	1	9462	uc001glr.3	-102316	ENSG00000075391	RASAL2	RAS protein activator like 2
chr1	178232106	178233000	895	*	MACS_peak_612	83.42	Intron (uc009wxb.2/9462, intron 1 of 4)	1	178310606	178448648	138043	1	9462	uc001glr.3	-77606	ENSG00000075391	RASAL2	RAS protein activator like 2
chr1	178306264	178307020	757	*	MACS_peak_613	85.95	Intron (uc009wxb.2/9462, intron 3 of 4)	1	178310606	178448648	138043	1	9462	uc001glr.3	-3586	ENSG00000075391	RASAL2	RAS protein activator like 2
chr1	179050670	179051305	636	*	MACS_peak_617	71.4	Promoter (<=1kb)	1	179051112	179065129	14018	1	64222	uc001gmd.3	0	ENSG00000186283	TOR3A	torsin family 3 member A
chr1	179133673	179134099	427	*	MACS_peak_618	115.9	Intron (uc001gmj.4/27, intron 1 of 11)	1	179085983	179112224	26242	2	27	uc009wxf.2	-21449	ENSG00000143322	ABL2	ABL proto-oncogene 2, non-receptor tyrosine kinase
chr1	179334648	179335216	569	*	MACS_peak_619	57.69	Promoter (<=1kb)	1	179334855	179437852	102998	1	126859	uc001gmn.2	0	ENSG00000162779	AXDND1	axonemal dynein light chain domain containing 1
chr1	179851256	179851700	445	*	MACS_peak_620	55.85	Promoter (<=1kb)	1	179851177	179889212	38036	1	26092	uc001gnq.4	79	ENSG00000143337	TOR1AIP1	torsin 1A interacting protein 1
chr1	180991823	180992606	784	*	MACS_peak_623	123.39	Promoter (<=1kb)	1	180942176	180992046	49871	2	10228	uc010pnr.2	0	ENSG00000135823	STX6	syntaxin 6
chr1	181012061	181012458	398	*	MACS_peak_624	53.81	Intron (uc001goq.2/3140, intron 2 of 6)	1	181003023	181020399	17377	1	3140	uc001gop.3	9038	ENSG00000153029	MR1	major histocompatibility complex, class I-related
chr1	181483041	181483512	472	*	MACS_peak_629	58.92	Intron (uc001gow.3/777, intron 3 of 46)	1	181479613	181621230	141618	1	777	uc009wxr.3	3428	ENSG00000198216	CACNA1E	calcium voltage-gated channel subunit alpha1 E
chr1	181507977	181508282	306	*	MACS_peak_630	115.58	Intron (uc001gow.3/777, intron 3 of 46)	1	181479613	181621230	141618	1	777	uc009wxr.3	28364	ENSG00000198216	CACNA1E	calcium voltage-gated channel subunit alpha1 E
chr1	182991172	182992032	861	*	MACS_peak_637	107.19	Promoter (<=1kb)	1	182992595	183074191	81597	1	3915	uc001gpx.3	-563	ENSG00000135862	LAMC1	laminin subunit gamma 1
chr1	183063198	183063821	624	*	MACS_peak_638	70.06	Intron (uc001gpx.3/3915, intron 1 of 1)	1	182992595	183114727	122133	1	3915	uc001gpy.4	70603	ENSG00000135862	LAMC1	laminin subunit gamma 1
chr1	183177143	183177616	474	*	MACS_peak_639	65.25	5' UTR	1	183155174	183214262	59089	1	3918	uc001gqa.2	21969	ENSG00000058085	LAMC2	laminin subunit gamma 2
chr1	183203702	183204117	416	*	MACS_peak_640	65.26	Intron (uc001gpz.4/3918, intron 15 of 21)	1	183217372	183248417	31046	2	23057	uc009wye.2	44300	ENSG00000157064	NMNAT2	nicotinamide nucleotide adenylyltransferase 2
chr1	183440142	183440765	624	*	MACS_peak_641	62.65	Promoter (<=1kb)	1	183430011	183441117	11107	2	284649	uc001gqe.3	352	ENSG00000232860	SMG7-AS1	SMG7 antisense RNA 1
chr1	183502785	183503287	503	*	MACS_peak_642	57.08	Exon (uc010pob.2/9887, exon 11 of 18)	1	183524697	183559739	35043	2	4688	uc001gqj.4	56452	ENSG00000116701	NCF2	neutrophil cytosolic factor 2
chr1	183536494	183537036	543	*	MACS_peak_643	60.87	Intron (uc001gqj.4/4688, intron 7 of 14)	1	183524697	183559739	35043	2	4688	uc001gqj.4	22703	ENSG00000116701	NCF2	neutrophil cytosolic factor 2
chr1	183604392	183605373	982	*	MACS_peak_644	128.33	Promoter (<=1kb)	1	183595328	183605076	9749	2	10092	uc001gql.4	0	ENSG00000162704	ARPC5	actin related protein 2/3 complex subunit 5
chr1	183885287	183885549	263	*	MACS_peak_645	63.86	Intron (uc001gqm.3/23179, intron 16 of 18)	1	183904966	183915752	10787	2	23127	uc001gqp.3	30203	ENSG00000198756	COLGALT2	collagen beta(1-O)galactosyltransferase 2
chr1	183911877	183912672	796	*	MACS_peak_646	177.8	Intron (uc010poj.1/23127, intron 10 of 11)	1	183904966	183915752	10787	2	23127	uc001gqp.3	3080	ENSG00000198756	COLGALT2	collagen beta(1-O)galactosyltransferase 2
chr1	183971258	183971596	339	*	MACS_peak_647	85.97	Intron (uc010poj.1/23127, intron 1 of 11)	1	183898796	184006863	108068	2	23127	uc010poj.1	35267	ENSG00000198756	COLGALT2	collagen beta(1-O)galactosyltransferase 2
chr1	184452271	184452659	389	*	MACS_peak_650	56.63	Intron (uc001gqv.1/81563, intron 2 of 5)	1	184356150	184598155	242006	1	81563	uc001gqv.1	96121	ENSG00000116667	C1orf21	chromosome 1 open reading frame 21
chr1	184460716	184461135	420	*	MACS_peak_651	76.48	Intron (uc001gqv.1/81563, intron 2 of 5)	1	184356150	184598155	242006	1	81563	uc001gqv.1	104566	ENSG00000116667	C1orf21	chromosome 1 open reading frame 21
chr1	184525635	184526366	732	*	MACS_peak_652	82.3	Intron (uc001gqv.1/81563, intron 3 of 5)	1	184356150	184598155	242006	1	81563	uc001gqv.1	169485	ENSG00000116667	C1orf21	chromosome 1 open reading frame 21
chr1	184536808	184537377	570	*	MACS_peak_653	61.88	Intron (uc001gqv.1/81563, intron 3 of 5)	1	184356150	184598155	242006	1	81563	uc001gqv.1	180658	ENSG00000116667	C1orf21	chromosome 1 open reading frame 21
chr1	184591360	184591725	366	*	MACS_peak_654	58.73	3' UTR	1	184659625	184724041	64417	2	80267	uc010pok.2	132316	ENSG00000116406	EDEM3	ER degradation enhancing alpha-mannosidase like protein 3
chr1	184724320	184724720	401	*	MACS_peak_656	59.33	Promoter (<=1kb)	1	184689660	184724041	34382	2	80267	uc001gqy.3	-279	ENSG00000116406	EDEM3	ER degradation enhancing alpha-mannosidase like protein 3
chr1	184923410	184923823	414	*	MACS_peak_657	65.4	Intron (uc001gra.4/116496, intron 1 of 13)	1	184760159	184943718	183560	2	116496	uc001gra.4	19895	ENSG00000135842	FAM129A	family with sequence similarity 129 member A
chr1	185014123	185014710	588	*	MACS_peak_658	60.88	Promoter (<=1kb)	1	185014551	185071740	57190	1	6045	uc001grc.1	0	ENSG00000121481	RNF2	ring finger protein 2
chr1	185744428	185745031	604	*	MACS_peak_664	52.17	Intron (uc001grq.1/83872, intron 1 of 106)	1	185703683	186160085	456403	1	83872	uc001grq.1	40745	ENSG00000143341	HMCN1	hemicentin 1
chr1	185745214	185745996	783	*	MACS_peak_665	59.14	Intron (uc001grq.1/83872, intron 1 of 106)	1	185703683	186160085	456403	1	83872	uc001grq.1	41531	ENSG00000143341	HMCN1	hemicentin 1
chr1	185759167	185760297	1131	*	MACS_peak_666	138.95	Intron (uc001grq.1/83872, intron 1 of 106)	1	185703683	186160085	456403	1	83872	uc001grq.1	55484	ENSG00000143341	HMCN1	hemicentin 1
chr1	185908298	185908702	405	*	MACS_peak_667	112.01	Intron (uc001grq.1/83872, intron 11 of 106)	1	185926201	185962565	36365	1	83872	uc001grr.1	-17499	ENSG00000143341	HMCN1	hemicentin 1
chr1	185940620	185941119	500	*	MACS_peak_668	52.58	Intron (uc001grq.1/83872, intron 15 of 106)	1	185926201	185962565	36365	1	83872	uc001grr.1	14419	ENSG00000143341	HMCN1	hemicentin 1
chr1	186051296	186051807	512	*	MACS_peak_669	183.38	Intron (uc001grq.1/83872, intron 56 of 106)	1	186097210	186160085	62876	1	83872	uc001grs.1	-45403	ENSG00000143341	HMCN1	hemicentin 1
chr1	198172636	198172986	351	*	MACS_peak_682	112.75	Intron (uc001gun.4/140609, intron 1 of 9)	1	198126128	198291548	165421	1	140609	uc021pgx.1	46508	ENSG00000151414	NEK7	NIMA related kinase 7
chr1	198719978	198720498	521	*	MACS_peak_683	52.92	Intron (uc001gur.2/5788, intron 29 of 32)	1	198828002	198828111	110	2	406955	uc001gux.1	107613	ENSG00000207975	MIR181B1	microRNA 181b-1
chr1	198848903	198849351	449	*	MACS_peak_684	73.67	Intron (uc021pgz.1/100131234, intron 2 of 2)	1	198828173	198828282	110	2	406995	uc001guy.3	-20621	ENSG00000207759	MIR181A1	microRNA 181a-1
chr1	200076105	200076516	412	*	MACS_peak_687	65.54	Intron (uc001gvb.4/2494, intron 5 of 7)	1	200011953	200146550	134598	1	2494	uc010pph.3	64152	ENSG00000116833	NR5A2	nuclear receptor subfamily 5 group A member 2
chr1	200119659	200120195	537	*	MACS_peak_688	63.8	Intron (uc001gvb.4/2494, intron 7 of 7)	1	200011953	200146550	134598	1	2494	uc010pph.3	107706	ENSG00000116833	NR5A2	nuclear receptor subfamily 5 group A member 2
chr1	200433915	200434380	466	*	MACS_peak_689	59.28	Intron (uc010ppi.1/uc010ppi.1, intron 1 of 1)	1	200375858	200379166	3309	2	23528	uc001gvg.1	-54749	ENSG00000162702	ZNF281	zinc finger protein 281
chr1	201287527	201288027	501	*	MACS_peak_690	54.77	5' UTR	1	201252580	201302121	49542	1	5317	uc009wzm.3	34947	ENSG00000081277	PKP1	plakophilin 1
chr1	201631847	201632316	470	*	MACS_peak_697	65.52	Intron (uc001gwu.3/89796, intron 1 of 28)	1	201617450	201796102	178653	1	89796	uc021phi.1	14397	ENSG00000134369	NAV1	neuron navigator 1
chr1	201640374	201640974	601	*	MACS_peak_698	56.34	Intron (uc001gwu.3/89796, intron 1 of 28)	1	201617450	201796102	178653	1	89796	uc021phi.1	22924	ENSG00000134369	NAV1	neuron navigator 1
chr1	201676896	201677193	298	*	MACS_peak_699	82.5	Intron (uc001gwu.3/89796, intron 1 of 28)	1	201688636	201688755	120	1	100847050	uc031prn.1	-11443	ENSG00000264802	MIR5191	microRNA 5191
chr1	201683759	201684086	328	*	MACS_peak_700	56.63	Intron (uc001gwu.3/89796, intron 2 of 28)	1	201688636	201688755	120	1	100847050	uc031prn.1	-4550	ENSG00000264802	MIR5191	microRNA 5191
chr1	201689860	201690639	780	*	MACS_peak_701	74.72	Promoter (1-2kb)	1	201688636	201688755	120	1	100847050	uc031prn.1	1224	ENSG00000264802	MIR5191	microRNA 5191
chr1	201699739	201700664	926	*	MACS_peak_702	133.44	Intron (uc001gwu.3/89796, intron 3 of 28)	1	201708654	201772842	64189	1	89796	uc001gwv.1	-7990	ENSG00000134369	NAV1	neuron navigator 1
chr1	201738953	201739590	638	*	MACS_peak_703	140.84	Intron (uc001gwu.3/89796, intron 3 of 28)	1	201751304	201767736	16433	1	89796	uc001gwy.1	-11714	ENSG00000134369	NAV1	neuron navigator 1
chr1	201798323	201798761	439	*	MACS_peak_704	70.35	Promoter (<=1kb)	1	201798288	201853422	55135	1	55705	uc001gwz.3	35	ENSG00000198700	IPO9	importin 9
chr1	201871357	201871708	352	*	MACS_peak_705	56.41	Intron (uc010ppu.2/25802, intron 1 of 3)	1	201857805	201861715	3911	1	149345	uc001gxa.3	13552	ENSG00000198892	SHISA4	shisa family member 4
chr1	202112619	202113249	631	*	MACS_peak_707	59.15	Promoter (<=1kb)	1	202102532	202113871	11340	2	127829	uc001gxk.2	622	ENSG00000143862	ARL8A	ADP ribosylation factor like GTPase 8A
chr1	202252361	202253201	841	*	MACS_peak_708	91.28	Intron (uc001gxu.3/59352, intron 6 of 17)	1	202208056	202276067	68012	1	59352	uc009xac.1	44305	ENSG00000133067	LGR6	leucine rich repeat containing G protein-coupled receptor 6
chr1	202317555	202317990	436	*	MACS_peak_709	205.95	Promoter (<=1kb)	1	202317830	202407370	89541	1	4660	uc001gxy.3	0	ENSG00000077157	PPP1R12B	protein phosphatase 1 regulatory subunit 12B
chr1	202587553	202587965	413	*	MACS_peak_710	93.13	Intron (uc001gye.3/127833, intron 1 of 8)	1	202559725	202612581	52857	2	127833	uc001gye.3	24616	ENSG00000143858	SYT2	synaptotagmin 2
chr1	202791073	202791858	786	*	MACS_peak_711	67.27	Promoter (2-3kb)	1	202794329	202795421	1093	1	641515	uc021php.1	-2471	ENSG00000184774	MGAT4EP	MGAT4 family member E, pseudogene
chr1	202896245	202896809	565	*	MACS_peak_712	137.74	Promoter (<=1kb)	1	202860230	202896371	36142	2	59349	uc001gyo.1	0	ENSG00000117153	KLHL12	kelch like family member 12
chr1	202921986	202922388	403	*	MACS_peak_713	56.35	Intron (uc001gyq.5/51094, intron 1 of 7)	1	202909960	202917557	7598	2	51094	uc010pqd.3	-4429	ENSG00000159346	ADIPOR1	adiponectin receptor 1
chr1	203158902	203159486	585	*	MACS_peak_715	169.36	Promoter (2-3kb)	1	203148059	203155922	7864	2	1116	uc001gzj.2	-2980	ENSG00000133048	CHI3L1	chitinase 3 like 1
chr1	203642660	203643591	932	*	MACS_peak_720	77.79	Intron (uc001gzv.3/493, intron 1 of 21)	1	203651870	203702757	50888	1	493	uc009xaq.3	-8279	ENSG00000058668	ATP2B4	ATPase plasma membrane Ca2+ transporting 4
chr1	203764436	203764828	393	*	MACS_peak_721	103.85	Promoter (<=1kb)	1	203764751	203823256	58506	1	9877	uc001hac.3	0	ENSG00000058673	ZC3H11A	zinc finger CCCH-type containing 11A
chr1	203830493	203830827	335	*	MACS_peak_722	95.84	Promoter (<=1kb)	1	203830727	203840280	9554	1	6635	uc010pqn.3	0	ENSG00000182004	SNRPE	small nuclear ribonucleoprotein polypeptide E
chr1	204296039	204296732	694	*	MACS_peak_724	65.85	Intron (uc001hau.4/22874, intron 1 of 22)	1	204187979	204329057	141079	2	22874	uc001hau.4	32325	ENSG00000143850	PLEKHA6	pleckstrin homology domain containing A6
chr1	204435436	204435841	406	*	MACS_peak_725	138.27	Intron (uc001haw.3/5287, intron 3 of 33)	1	204391758	204459474	67717	2	5287	uc001haw.3	23633	ENSG00000133056	PIK3C2B	phosphatidylinositol-4-phosphate 3-kinase catalytic subunit type 2 beta
chr1	205180418	205180969	552	*	MACS_peak_726	56.02	Promoter (<=1kb)	1	205111631	205180727	69097	2	25778	uc001hbw.3	0	ENSG00000133059	DSTYK	dual serine/threonine and tyrosine protein kinase
chr1	205216316	205217023	708	*	MACS_peak_728	160.33	Promoter (<=1kb)	1	205215725	205242471	26747	1	9911	uc001hca.3	591	ENSG00000133069	TMCC2	transmembrane and coiled-coil domain family 2
chr1	205227771	205228327	557	*	MACS_peak_729	237.3	Promoter (1-2kb)	1	205226359	205242471	16113	1	9911	uc001hcc.2	1412	ENSG00000133069	TMCC2	transmembrane and coiled-coil domain family 2
chr1	205561148	205561435	288	*	MACS_peak_731	52.87	Exon (uc001hcv.4/148808, exon 7 of 10)	1	205548758	205572046	23289	1	148808	uc010prm.2	12390	ENSG00000174514	MFSD4A	major facilitator superfamily domain containing 4A
chr1	205744190	205744812	623	*	MACS_peak_732	77.94	Promoter (<=1kb)	1	205737114	205744610	7497	2	8934	uc001hde.4	0	ENSG00000117280	RAB29	RAB29, member RAS oncogene family
chr1	206939735	206940142	408	*	MACS_peak_733	63.08	Downstream (<1kb)	1	206940948	206945839	4892	2	3586	uc001hen.1	5697	ENSG00000136634	IL10	interleukin 10
chr1	207226055	207226877	823	*	MACS_peak_735	55.68	Promoter (<=1kb)	1	207226620	207251162	24543	1	5208	uc001hfg.3	0	ENSG00000123836	PFKFB2	6-phosphofructo-2-kinase/fructose-2,6-biphosphatase 2
chr1	208195258	208195524	267	*	MACS_peak_737	138.84	Downstream (<1kb)	1	208195588	208202551	6964	2	5362	uc001hgy.3	7027	ENSG00000076356	PLXNA2	plexin A2
chr1	208259640	208260467	828	*	MACS_peak_738	328.15	Intron (uc001hgz.3/5362, intron 9 of 31)	1	208195588	208202551	6964	2	5362	uc001hgy.3	-57089	ENSG00000076356	PLXNA2	plexin A2
chr1	208293800	208294405	606	*	MACS_peak_739	59.92	Intron (uc001hgz.3/5362, intron 4 of 31)	1	208195588	208202551	6964	2	5362	uc001hgy.3	-91249	ENSG00000076356	PLXNA2	plexin A2
chr1	208353019	208353592	574	*	MACS_peak_740	52.54	Intron (uc001hgz.3/5362, intron 3 of 31)	1	208383348	208392095	8748	2	5362	uc001hha.4	38503	ENSG00000076356	PLXNA2	plexin A2
chr1	208392874	208393399	526	*	MACS_peak_741	102	Promoter (<=1kb)	1	208383348	208392095	8748	2	5362	uc001hha.4	-779	ENSG00000076356	PLXNA2	plexin A2
chr1	209824692	209825018	327	*	MACS_peak_743	77.72	Promoter (<=1kb)	1	209788218	209824679	36462	2	3914	uc001hhg.3	-13	ENSG00000196878	LAMB3	laminin subunit beta 3
chr1	210013148	210013804	657	*	MACS_peak_744	70.11	Intron (uc001hhr.2/27042, intron 7 of 11)	1	210001312	210030910	29599	1	27042	uc009xcu.2	11836	ENSG00000117597	DIEXF	digestive organ expansion factor homolog (zebrafish)
chr1	210023499	210024211	713	*	MACS_peak_745	83.32	Intron (uc001hhr.2/27042, intron 11 of 11)	1	210001312	210030910	29599	1	27042	uc009xcu.2	22187	ENSG00000117597	DIEXF	digestive organ expansion factor homolog (zebrafish)
chr1	210566770	210567532	763	*	MACS_peak_748	62.61	Intron (uc009xcx.3/55733, intron 4 of 11)	1	210612927	210849638	236712	1	55733	uc001hia.4	-45395	ENSG00000054392	HHAT	hedgehog acyltransferase
chr1	210612199	210612700	502	*	MACS_peak_749	61.01	Promoter (<=1kb)	1	210612927	210849638	236712	1	55733	uc001hia.4	-227	ENSG00000054392	HHAT	hedgehog acyltransferase
chr1	210669477	210670020	544	*	MACS_peak_750	80.42	Intron (uc009xcx.3/55733, intron 8 of 11)	1	210612927	210849638	236712	1	55733	uc001hia.4	56550	ENSG00000054392	HHAT	hedgehog acyltransferase
chr1	211003689	211004070	382	*	MACS_peak_751	62.66	Intron (uc001hib.2/3756, intron 7 of 10)	1	210851657	211307457	455801	2	3756	uc001hib.2	303387	ENSG00000143473	KCNH1	potassium voltage-gated channel subfamily H member 1
chr1	211242287	211242789	503	*	MACS_peak_752	95.56	Intron (uc001hib.2/3756, intron 5 of 10)	1	210851657	211307457	455801	2	3756	uc001hib.2	64668	ENSG00000143473	KCNH1	potassium voltage-gated channel subfamily H member 1
chr1	212247681	212247946	266	*	MACS_peak_756	68.19	Intron (uc001hiz.4/51514, intron 9 of 12)	1	212250955	212251027	73	1	100422947	uc021pis.1	-3009	ENSG00000264358	MIR3122	microRNA 3122
chr1	214453801	214454196	396	*	MACS_peak_768	56.41	Promoter (<=1kb)	1	214454565	214504413	49849	1	56950	uc021piw.1	-369	ENSG00000143499	SMYD2	SET and MYND domain containing 2
chr1	215374317	215374937	621	*	MACS_peak_770	61.92	Intron (uc001hko.3/3776, intron 6 of 6)	1	215256560	215410436	153877	1	3776	uc001hkr.4	117757	ENSG00000082482	KCNK2	potassium two pore domain channel subfamily K member 2
chr1	215838505	215838880	376	*	MACS_peak_773	85.97	Intron (uc001hku.1/7399, intron 64 of 71)	1	215752343	215795149	42807	1	51133	uc009xdn.3	86162	ENSG00000136636	KCTD3	potassium channel tetramerization domain containing 3
chr1	216218694	216219178	485	*	MACS_peak_774	51.36	Intron (uc001hku.1/7399, intron 32 of 71)	1	215796236	216596738	800503	2	7399	uc001hku.1	377560	ENSG00000042781	USH2A	usherin
chr1	216584879	216585870	992	*	MACS_peak_775	109.92	Intron (uc001hku.1/7399, intron 3 of 71)	1	215796236	216596738	800503	2	7399	uc001hku.1	10868	ENSG00000042781	USH2A	usherin
chr1	216774035	216774396	362	*	MACS_peak_776	59.33	Intron (uc001hkw.2/2104, intron 3 of 6)	1	216676588	216896814	220227	2	2104	uc001hkw.2	122418	ENSG00000196482	ESRRG	estrogen related receptor gamma
chr1	217083482	217084195	714	*	MACS_peak_777	115.61	Intron (uc001hky.1/2104, intron 1 of 7)	1	216676588	217113015	436428	2	2104	uc001hky.1	28820	ENSG00000196482	ESRRG	estrogen related receptor gamma
chr1	218083990	218084733	744	*	MACS_peak_778	232.15	Intron (uc031psc.1/100885798, intron 1 of 3)	1	218066242	218094146	27905	1	100885798	uc031psc.1	17748	ENSG00000231814	LINC00210	long intergenic non-protein coding RNA 210
chr1	218458408	218458942	535	*	MACS_peak_779	101.48	Promoter (<=1kb)	1	218458629	218511325	52697	1	51018	uc001hlj.3	0	ENSG00000067533	RRP15	ribosomal RNA processing 15 homolog
chr1	219347861	219348379	519	*	MACS_peak_782	62.32	Promoter (<=1kb)	1	219347192	219386207	39016	1	127018	uc009xds.3	669	ENSG00000143353	LYPLAL1	lysophospholipase like 1
chr1	219920800	219921381	582	*	MACS_peak_789	89.13	Intron (uc001hlu.1/55532, intron 8 of 8)	1	220046619	220292777	246159	1	26828	uc021pjd.1	-125238	ENSG00000199377	RNU5F-1	RNA, U5F small nuclear 1
chr1	219944233	219945113	881	*	MACS_peak_790	140.81	Intron (uc001hlu.1/55532, intron 8 of 8)	1	220046619	220292777	246159	1	26828	uc021pjd.1	-101506	ENSG00000199377	RNU5F-1	RNA, U5F small nuclear 1
chr1	219985809	219986230	422	*	MACS_peak_791	55.26	Intron (uc001hlu.1/55532, intron 6 of 8)	1	220046619	220292777	246159	1	26828	uc021pjd.1	-60389	ENSG00000199377	RNU5F-1	RNA, U5F small nuclear 1
chr1	220219584	220220316	733	*	MACS_peak_792	60.94	Promoter (<=1kb)	1	220141942	220220000	78059	2	2058	uc001hly.1	0	ENSG00000136628	EPRS	glutamyl-prolyl-tRNA synthetase
chr1	220445587	220446100	514	*	MACS_peak_793	61.33	Promoter (<=1kb)	1	220321610	220445843	124234	2	25782	uc001hmf.2	0	ENSG00000118873	RAB3GAP2	RAB3 GTPase activating non-catalytic protein subunit 2
chr1	220869954	220870784	831	*	MACS_peak_794	81.22	3' UTR	1	220863628	220872499	8872	1	79762	uc001hmp.1	6326	ENSG00000162817	C1orf115	chromosome 1 open reading frame 115
chr1	220981846	220982161	316	*	MACS_peak_795	119.01	Intron (uc001hms.3/64757, intron 6 of 6)	1	220960039	220987741	27703	1	64757	uc001hmt.3	21807	ENSG00000186205	2001-03-01	mitochondrial amidoxime reducing component 1
chr1	222885918	222886329	412	*	MACS_peak_805	208.38	Promoter (<=1kb)	1	222841355	222886079	44725	2	64853	uc001hno.3	0	ENSG00000186063	AIDA	axin interactor, dorsalization associated
chr1	223003197	223003672	476	*	MACS_peak_807	119.84	Intron (uc001hnu.2/84976, intron 1 of 9)	1	222988431	223179337	190907	1	84976	uc001hnu.2	14766	ENSG00000154309	DISP1	dispatched RND transporter family member 1
chr1	223167891	223168229	339	*	MACS_peak_808	53.81	Exon (uc001hnu.2/84976, exon 9 of 10)	1	223282748	223308206	25459	2	7100	uc001hnv.2	139977	ENSG00000187554	TLR5	toll like receptor 5
chr1	223952741	223953483	743	*	MACS_peak_810	85.61	Intron (uc010puy.2/824, intron 15 of 20)	1	223945326	223963720	18395	1	824	uc001hoc.3	7415	ENSG00000162909	CAPN2	calpain 2
chr1	224517868	224518262	395	*	MACS_peak_811	99.16	Promoter (<=1kb)	1	224415036	224517891	102856	2	4931	uc001hok.3	0	ENSG00000143748	NVL	nuclear VCP-like
chr1	224854663	224854947	285	*	MACS_peak_816	99.16	Intron (uc001hos.1/149111, intron 1 of 5)	1	224804179	224928249	124071	1	149111	uc001hos.1	50484	ENSG00000143786	CNIH3	cornichon family AMPA receptor auxiliary protein 3
chr1	224913911	224914987	1077	*	MACS_peak_817	123.53	Intron (uc001hos.1/149111, intron 3 of 5)	1	224804179	224928249	124071	1	149111	uc001hos.1	109732	ENSG00000143786	CNIH3	cornichon family AMPA receptor auxiliary protein 3
chr1	224924240	224925003	764	*	MACS_peak_818	61.81	Intron (uc001hos.1/149111, intron 5 of 5)	1	224804179	224928249	124071	1	149111	uc001hos.1	120061	ENSG00000143786	CNIH3	cornichon family AMPA receptor auxiliary protein 3
chr1	225535018	225535565	548	*	MACS_peak_822	72.51	Intron (uc001how.2/127602, intron 69 of 83)	1	225589204	225615815	26612	2	3930	uc001hoy.3	80250	ENSG00000143815	LBR	lamin B receptor
chr1	226129270	226129700	431	*	MACS_peak_825	67.28	Promoter (<=1kb)	1	226124298	226129083	4786	2	7044	uc010pvk.2	-187	ENSG00000143768	LEFTY2	left-right determination factor 2
chr1	226186943	226187409	467	*	MACS_peak_826	68.33	Promoter (<=1kb)	1	226170403	226187066	16664	2	163859	uc001hpu.4	0	ENSG00000143751	SDE2	SDE2 telomere maintenance homolog
chr1	226820345	226820854	510	*	MACS_peak_829	58.79	3' UTR	1	226736501	226796915	60415	1	375057	uc021pjx.1	83844	ENSG00000203685	STUM	stum, mechanosensory transduction mediator homolog
chr1	226850242	226851088	847	*	MACS_peak_830	66.05	Intron (uc010pvo.2/3707, intron 2 of 7)	1	226819391	226926876	107486	2	3707	uc010pvo.2	75788	ENSG00000143772	ITPKB	inositol-trisphosphate 3-kinase B
chr1	226864729	226865084	356	*	MACS_peak_831	70.61	Intron (uc010pvo.2/3707, intron 2 of 7)	1	226819391	226926876	107486	2	3707	uc010pvo.2	61792	ENSG00000143772	ITPKB	inositol-trisphosphate 3-kinase B
chr1	229583498	229583817	320	*	MACS_peak_840	73.24	Intron (uc001htn.3/55746, intron 24 of 25)	1	229566993	229569843	2851	2	58	uc001htm.3	-13655	ENSG00000143632	ACTA1	actin, alpha 1, skeletal muscle
chr1	229617791	229618138	348	*	MACS_peak_841	66.37	Intron (uc001htn.3/55746, intron 12 of 25)	1	229577044	229644088	67045	2	55746	uc001htn.3	25950	ENSG00000069248	NUP133	nucleoporin 133
chr1	230249165	230250123	959	*	MACS_peak_843	186.83	Intron (uc010pvy.1/2590, intron 1 of 15)	1	230202956	230417875	214920	1	2590	uc010pwa.1	46209	ENSG00000143641	GALNT2	polypeptide N-acetylgalactosaminyltransferase 2
chr1	230481137	230481973	837	*	MACS_peak_844	77.35	Intron (uc031psq.1/79605, intron 3 of 6)	1	230457392	230561674	104283	2	79605	uc031psq.1	79701	ENSG00000177614	PGBD5	piggyBac transposable element derived 5
chr1	230486422	230486893	472	*	MACS_peak_845	52.12	Exon (uc031psq.1/79605, exon 3 of 7)	1	230457392	230561674	104283	2	79605	uc031psq.1	74781	ENSG00000177614	PGBD5	piggyBac transposable element derived 5
chr1	230994910	230995313	404	*	MACS_peak_846	77.54	Intron (uc001hub.3/84886, intron 1 of 3)	1	230972865	230991782	18918	2	84886	uc009xfh.2	-3128	ENSG00000119280	C1orf198	chromosome 1 open reading frame 198
chr1	231071170	231071485	316	*	MACS_peak_847	76.64	Intron (uc001huf.4/79573, intron 8 of 22)	1	231041987	231114618	72632	2	79573	uc001huf.4	43133	ENSG00000143643	TTC13	tetratricopeptide repeat domain 13
chr1	231120923	231121384	462	*	MACS_peak_848	55.66	Intron (uc009xfl.1/64801, intron 1 of 4)	1	231114823	231136479	21657	1	64801	uc001huh.3	6100	ENSG00000173409	ARV1	ARV1 homolog, fatty acid homeostasis modulator
chr1	231336367	231336722	356	*	MACS_peak_851	61.91	Intron (uc009xfn.1/440730, intron 4 of 9)	1	231319845	231323373	3529	2	149373	uc031pss.1	-12994	ENSG00000235710	LOC149373	uncharacterized LOC149373
chr1	231663835	231664679	845	*	MACS_peak_853	87.1	Promoter (<=1kb)	1	231664399	231838307	173909	1	100303453	uc010pwe.2	0	ENSG00000270106	TSNAX-DISC1	TSNAX-DISC1 readthrough (NMD candidate)
chr1	231707408	231708085	678	*	MACS_peak_854	68.53	Intron (uc010pwe.2/100303453, intron 5 of 8)	1	231727038	231747836	20799	2	100287814	uc021pkm.2	39751	ENSG00000229228	LINC00582	long intergenic non-protein coding RNA 582
chr1	231709225	231709995	771	*	MACS_peak_855	67.42	Intron (uc010pwe.2/100303453, intron 5 of 8)	1	231727038	231747836	20799	2	100287814	uc021pkm.2	37841	ENSG00000229228	LINC00582	long intergenic non-protein coding RNA 582
chr1	231762269	231762582	314	*	MACS_peak_856	51.18	Promoter (<=1kb)	1	231762561	231838307	75747	1	27185	uc010pwm.2	0	ENSG00000162946	DISC1	disrupted in schizophrenia 1
chr1	231870027	231870513	487	*	MACS_peak_857	66.97	Intron (uc010pwf.2/100303453, intron 7 of 7)	1	231950372	231954263	3892	2	27184	uc001hvd.3	83750	NA	DISC2	disrupted in schizophrenia 2 (non-protein coding)
chr1	232039307	232039911	605	*	MACS_peak_858	62.92	Intron (uc010pwl.2/100303453, intron 12 of 15)	1	231950372	231954263	3892	2	27184	uc001hvd.3	-85044	NA	DISC2	disrupted in schizophrenia 2 (non-protein coding)
chr1	232059889	232060527	639	*	MACS_peak_859	94.67	Intron (uc010pwl.2/100303453, intron 12 of 15)	1	231950372	231954263	3892	2	27184	uc001hvd.3	-105626	NA	DISC2	disrupted in schizophrenia 2 (non-protein coding)
chr1	232608364	232608868	505	*	MACS_peak_861	177.1	Intron (uc001hvg.3/57568, intron 5 of 20)	1	232533712	232598163	64452	2	57568	uc001hvf.3	-10201	ENSG00000116991	SIPA1L2	signal induced proliferation associated 1 like 2
chr1	233307946	233308407	462	*	MACS_peak_862	52.98	Intron (uc001hvm.2/80003, intron 4 of 19)	1	233119882	233336010	216129	2	80003	uc001hvm.2	27603	ENSG00000135749	PCNX2	pecanex homolog 2
chr1	233382729	233383189	461	*	MACS_peak_863	57.12	Intron (uc001hvl.2/80003, intron 8 of 33)	1	233337238	233388433	51196	2	80003	uc001hvq.1	5244	ENSG00000135749	PCNX2	pecanex homolog 2
chr1	233389337	233389817	481	*	MACS_peak_864	53.66	Promoter (<=1kb)	1	233337238	233388433	51196	2	80003	uc001hvq.1	-904	ENSG00000135749	PCNX2	pecanex homolog 2
chr1	234508939	234509715	777	*	MACS_peak_865	97.82	Promoter (<=1kb)	1	234509214	234519795	10582	1	388753	uc001hwb.3	0	ENSG00000168275	COA6	cytochrome c oxidase assembly factor 6
chr1	234663548	234664449	902	*	MACS_peak_866	69.12	Exon (uc001hwe.3/100506795, exon 3 of 3)	1	234663637	234667525	3889	2	100506795	uc001hwe.3	3076	ENSG00000231768	LINC01354	long intergenic non-protein coding RNA 1354
chr1	234859001	234860261	1261	*	MACS_peak_870	90.2	Promoter (<=1kb)	1	234859789	234867390	7602	1	100506810	uc001hwj.2	0	ENSG00000227630	LINC01132	long intergenic non-protein coding RNA 1132
chr1	235291896	235292579	684	*	MACS_peak_875	58.83	Promoter (<=1kb)	1	235272658	235292256	19599	2	9804	uc001hwl.3	0	ENSG00000173726	TOMM20	translocase of outer mitochondrial membrane 20
chr1	235476424	235476883	460	*	MACS_peak_876	59.65	Intron (uc021pks.1/51742, intron 2 of 23)	1	235490665	235507844	17180	1	9453	uc031psu.1	-13782	ENSG00000152904	GGPS1	geranylgeranyl diphosphate synthase 1
chr1	235530408	235531142	735	*	MACS_peak_877	65.59	Promoter (<=1kb)	1	235530728	235600789	70062	1	6905	uc010pxq.1	0	ENSG00000116957	TBCE	tubulin folding cofactor E
chr1	235667510	235668718	1209	*	MACS_peak_878	70.75	Promoter (<=1kb)	1	235610505	235667781	57277	2	148789	uc001hxc.3	0	ENSG00000162885	B3GALNT2	beta-1,3-N-acetylgalactosaminyltransferase 2
chr1	235781666	235782089	424	*	MACS_peak_879	52.5	Intron (uc001hxe.4/2786, intron 1 of 3)	1	235710985	235813293	102309	2	2786	uc001hxe.4	31204	ENSG00000168243	GNG4	G protein subunit gamma 4
chr1	236035275	236035999	725	*	MACS_peak_880	78.14	Intron (uc009xgb.2/1130, intron 1 of 22)	1	235992708	236030227	37520	2	1130	uc001hxn.2	-5048	ENSG00000143669	LYST	lysosomal trafficking regulator
chr1	236187990	236188380	391	*	MACS_peak_883	51.18	Intron (uc001hxo.3/4811, intron 8 of 19)	1	236139132	236175343	36212	2	4811	uc009xgc.3	-12647	ENSG00000116962	NID1	nidogen 1
chr1	236221475	236221870	396	*	MACS_peak_884	70.61	Intron (uc001hxo.3/4811, intron 1 of 19)	1	236139132	236228481	89350	2	4811	uc001hxo.3	6611	ENSG00000116962	NID1	nidogen 1
chr1	236332084	236332408	325	*	MACS_peak_886	167.3	Intron (uc001hxq.3/7107, intron 2 of 6)	1	236305832	236372209	66378	1	7107	uc001hxq.3	26252	ENSG00000077585	GPR137B	G protein-coupled receptor 137B
chr1	236687707	236688128	422	*	MACS_peak_887	101.52	Promoter (<=1kb)	1	236686369	236687808	1440	2	100287902	uc001hxx.3	0	ENSG00000223776	LGALS8-AS1	LGALS8 antisense RNA 1
chr1	236767627	236768537	911	*	MACS_peak_888	93.06	Promoter (<=1kb)	1	236712305	236767841	55537	2	55127	uc001hyd.2	0	ENSG00000119285	HEATR1	HEAT repeat containing 1
chr1	237692110	237692879	770	*	MACS_peak_890	56.85	Intron (uc001hyl.1/6262, intron 24 of 104)	1	237838031	237889608	51578	1	6262	uc010pxz.1	-145152	ENSG00000198626	RYR2	ryanodine receptor 2
chr1	238040999	238041316	318	*	MACS_peak_891	63.86	3' UTR	1	238041164	238054222	13059	2	57829	uc001hym.3	12906	ENSG00000116996	ZP4	zona pellucida glycoprotein 4
chr1	240395502	240396372	871	*	MACS_peak_895	98.24	Intron (uc010pyd.2/56776, intron 6 of 17)	1	240408560	240555862	147303	1	56776	uc010pyf.1	-12188	ENSG00000155816	FMN2	formin 2
chr1	240739334	240740094	761	*	MACS_peak_896	64.34	Intron (uc001hys.3/64388, intron 1 of 1)	1	240652873	240775462	122590	2	64388	uc001hys.3	35368	ENSG00000180875	GREM2	gremlin 2, DAN family BMP antagonist
chr1	240994579	240995248	670	*	MACS_peak_899	64.39	Intron (uc010pyh.2/6000, intron 9 of 17)	1	240938817	241032152	93336	2	6000	uc001hyt.2	36904	ENSG00000182901	RGS7	regulator of G protein signaling 7
chr1	241319720	241320210	491	*	MACS_peak_900	74.44	Intron (uc010pyj.1/6000, intron 1 of 17)	1	240931554	241307868	376315	2	6000	uc010pyh.2	-11852	ENSG00000182901	RGS7	regulator of G protein signaling 7
chr1	241718880	241719295	416	*	MACS_peak_901	74.98	Exon (uc001hyy.3/8564, exon 5 of 14)	1	241695434	241758949	63516	1	8564	uc009xgp.3	23446	ENSG00000117009	KMO	kynurenine 3-monooxygenase
chr1	241948507	241949165	659	*	MACS_peak_902	73.23	Intron (uc001hzg.2/128025, intron 22 of 26)	1	242011493	242053241	41749	1	9156	uc001hzh.3	-62328	ENSG00000174371	EXO1	exonuclease 1
chr1	242363376	242363802	427	*	MACS_peak_903	70.97	Intron (uc001hzl.4/200150, intron 5 of 9)	1	242158792	242162385	3594	2	440738	uc001hzk.2	-200991	ENSG00000197769	MAP1LC3C	microtubule associated protein 1 light chain 3 gamma
chr1	243483281	243483859	579	*	MACS_peak_904	53.15	Intron (uc001hzw.3/10806, intron 9 of 17)	1	243509478	243509557	80	1	100616343	uc021plt.1	-25619	ENSG00000265201	MIR4677	microRNA 4677
chr1	243876879	243877167	289	*	MACS_peak_905	66.25	Intron (uc001hzz.1/10000, intron 1 of 13)	1	243651535	244006584	355050	2	10000	uc001hzz.1	129417	ENSG00000117020	AKT3	AKT serine/threonine kinase 3
chr1	244006645	244006973	329	*	MACS_peak_906	105.71	Promoter (<=1kb)	1	243663021	244006886	343866	2	10000	uc021plu.1	0	ENSG00000117020	AKT3	AKT serine/threonine kinase 3
chr1	244099074	244099789	716	*	MACS_peak_907	52.82	Intron (uc001iac.3/339529, intron 1 of 11)	1	244080704	244210619	129916	1	339529	uc001iac.3	18370	ENSG00000226828	LOC339529	uncharacterized LOC339529
chr1	244715845	244716155	311	*	MACS_peak_908	61.01	Exon (uc001ial.3/257044, exon 9 of 21)	1	244624673	244803662	178990	1	257044	uc010pyn.2	91172	ENSG00000179397	CATSPERE	catsper channel auxiliary subunit epsilon
chr1	245026372	245026877	506	*	MACS_peak_909	80.56	Promoter (<=1kb)	1	245013602	245027827	14226	2	3192	uc001iaz.1	950	ENSG00000153187	HNRNPU	heterogeneous nuclear ribonucleoprotein U
chr1	245332530	245333196	667	*	MACS_peak_910	70.56	Intron (uc010pyq.1/55083, intron 2 of 9)	1	245318287	245866428	548142	1	55083	uc001ibf.1	14243	ENSG00000162849	KIF26B	kinesin family member 26B
chr1	245592624	245593049	426	*	MACS_peak_911	50.06	Intron (uc010pyq.1/55083, intron 4 of 9)	1	245516980	245535019	18040	1	55083	uc010pyr.2	75644	ENSG00000162849	KIF26B	kinesin family member 26B
chr1	246005506	246005927	422	*	MACS_peak_912	62.3	Intron (uc001ibj.3/64754, intron 5 of 6)	1	245912642	246094125	181484	2	64754	uc001ibj.3	88198	ENSG00000185420	SMYD3	SET and MYND domain containing 3
chr1	246057871	246058655	785	*	MACS_peak_913	68.73	Intron (uc001ibj.3/64754, intron 3 of 6)	1	245912642	246094125	181484	2	64754	uc001ibj.3	35470	ENSG00000185420	SMYD3	SET and MYND domain containing 3
chr1	246378269	246378868	600	*	MACS_peak_914	69.97	Intron (uc001ibk.3/64754, intron 5 of 11)	1	245912642	246580714	668073	2	64754	uc001ibk.3	201846	ENSG00000185420	SMYD3	SET and MYND domain containing 3
chr1	246729110	246729992	883	*	MACS_peak_915	51.97	Promoter (<=1kb)	1	246729639	246811544	81906	1	163882	uc001ibo.4	0	ENSG00000162852	CNST	consortin, connexin sorting protein
chr1	246772247	246772755	509	*	MACS_peak_916	74.94	Intron (uc001ibo.4/163882, intron 2 of 8)	1	246729639	246831884	102246	1	163882	uc001ibp.3	42608	ENSG00000162852	CNST	consortin, connexin sorting protein
chr1	246795661	246796310	650	*	MACS_peak_917	78.83	Intron (uc001ibo.4/163882, intron 4 of 8)	1	246729639	246831884	102246	1	163882	uc001ibp.3	66022	ENSG00000162852	CNST	consortin, connexin sorting protein
chr1	246808542	246808746	205	*	MACS_peak_918	128.05	Intron (uc001ibo.4/163882, intron 8 of 8)	1	246887378	246931440	44063	1	51097	uc001ibr.3	-78632	ENSG00000143653	SCCPDH	saccharopine dehydrogenase (putative)
chr1	247019563	247020032	470	*	MACS_peak_920	59.04	Intron (uc009xgs.1/25909, intron 21 of 25)	1	247012917	247040383	27467	2	25909	uc001ibw.1	20351	ENSG00000153207	AHCTF1	AT-hook containing transcription factor 1
chr1	247267509	247268030	522	*	MACS_peak_921	68.21	Promoter (<=1kb)	1	247263264	247267674	4411	2	79862	uc001ice.2	0	ENSG00000188295	ZNF669	zinc finger protein 669
chr10	440337	440972	636	*	MACS_peak_923	74.14	Intron (uc001ifp.3/22982, intron 10 of 36)	10	428359	460050	31692	2	22982	uc009xhj.1	19078	ENSG00000151240	DIP2C	disco interacting protein 2 homolog C
chr10	504252	505023	772	*	MACS_peak_924	79.87	Intron (uc001ifp.3/22982, intron 3 of 36)	10	468764	531104	62341	2	22982	uc009xhk.1	26081	ENSG00000151240	DIP2C	disco interacting protein 2 homolog C
chr10	593405	593992	588	*	MACS_peak_925	88.08	Intron (uc001ifp.3/22982, intron 1 of 36)	10	468764	531104	62341	2	22982	uc009xhk.1	-62301	ENSG00000151240	DIP2C	disco interacting protein 2 homolog C
chr10	644264	644853	590	*	MACS_peak_926	68.95	Intron (uc001ifp.3/22982, intron 1 of 36)	10	687629	687718	90	2	100847086	uc010qaa.2	42865	ENSG00000263511	MIR5699	microRNA 5699
chr10	661528	662222	695	*	MACS_peak_927	82.83	Intron (uc001ifp.3/22982, intron 1 of 36)	10	687629	687718	90	2	100847086	uc010qaa.2	25496	ENSG00000263511	MIR5699	microRNA 5699
chr10	670409	671540	1132	*	MACS_peak_928	91.07	Intron (uc001ifp.3/22982, intron 1 of 36)	10	687629	687718	90	2	100847086	uc010qaa.2	16178	ENSG00000263511	MIR5699	microRNA 5699
chr10	711388	711984	597	*	MACS_peak_929	66.31	Intron (uc001ifp.3/22982, intron 1 of 36)	10	696017	711109	15093	1	414235	uc001ifr.3	15371	ENSG00000180525	PRR26	proline rich 26
chr10	1101814	1102377	564	*	MACS_peak_930	59.56	Promoter (<=1kb)	10	1102344	1142566	40223	1	22884	uc001ige.3	0	ENSG00000047056	WDR37	WD repeat domain 37
chr10	1202416	1202821	406	*	MACS_peak_931	59.08	Promoter (2-3kb)	10	1205708	1210612	4905	1	399706	uc010qag.1	-2887	ENSG00000229205	LINC00200	long intergenic non-protein coding RNA 200
chr10	1365975	1366453	479	*	MACS_peak_932	123.2	Intron (uc009xhq.3/105, intron 3 of 9)	10	1223253	1246331	23079	2	105	uc001igm.4	-119644	ENSG00000185736	ADARB2	adenosine deaminase, RNA specific B2 (inactive)
chr10	1411982	1412272	291	*	MACS_peak_933	63.51	Intron (uc009xhq.3/105, intron 2 of 9)	10	1568825	1599179	30355	1	642394	uc001ign.3	-156553	ENSG00000205696	ADARB2-AS1	ADARB2 antisense RNA 1
chr10	3366111	3366516	406	*	MACS_peak_935	59.08	Intron (uc001igy.1/uc001igy.1, intron 1 of 1)	10	3180427	3215033	34607	2	10531	uc010qai.2	-151078	ENSG00000107959	PITRM1	pitrilysin metallopeptidase 1
chr10	3441445	3441717	273	*	MACS_peak_936	83	Intron (uc001igy.1/uc001igy.1, intron 1 of 1)	10	3180427	3215033	34607	2	10531	uc010qai.2	-226412	ENSG00000107959	PITRM1	pitrilysin metallopeptidase 1
chr10	3558342	3559185	844	*	MACS_peak_937	96.91	Intron (uc001igy.1/uc001igy.1, intron 1 of 1)	10	3818188	3827473	9286	2	1316	uc001iha.3	268288	ENSG00000067082	KLF6	Kruppel like factor 6
chr10	3581155	3581638	484	*	MACS_peak_938	71.21	Intron (uc001igy.1/uc001igy.1, intron 1 of 1)	10	3818188	3827473	9286	2	1316	uc001iha.3	245835	ENSG00000067082	KLF6	Kruppel like factor 6
chr10	4705368	4705702	335	*	MACS_peak_944	80.99	Intron (uc001ihe.4/100216001, intron 1 of 3)	10	4698348	4704606	6259	1	338588	uc001ihg.3	7020	NA	LINC00705	long intergenic non-protein coding RNA 705
chr10	6128318	6128758	441	*	MACS_peak_946	120.47	Promoter (2-3kb)	10	6130949	6159422	28474	1	84991	uc001ijb.3	-2191	ENSG00000134453	RBM17	RNA binding motif protein 17
chr10	6246368	6246975	608	*	MACS_peak_947	86.48	Promoter (1-2kb)	10	6244840	6277507	32668	1	5209	uc001ijf.3	1528	ENSG00000170525	PFKFB3	6-phosphofructo-2-kinase/fructose-2,6-biphosphatase 3
chr10	6261003	6261684	682	*	MACS_peak_948	117.2	Exon (uc001ijd.3/5209, exon 7 of 15)	10	6266112	6277507	11396	1	5209	uc001ijg.3	-4428	ENSG00000170525	PFKFB3	6-phosphofructo-2-kinase/fructose-2,6-biphosphatase 3
chr10	6317176	6317750	575	*	MACS_peak_950	59.01	Promoter (1-2kb)	10	6319650	6377937	58288	1	399715	uc021pms.1	-1900	ENSG00000215244	LOC399715	uncharacterized LOC399715
chr10	7808181	7808738	558	*	MACS_peak_952	126.97	Intron (uc001ijt.3/22944, intron 8 of 12)	10	7792925	7829990	37066	2	22944	uc001ijt.3	21252	ENSG00000151657	KIN	Kin17 DNA and RNA binding protein
chr10	11077315	11077830	516	*	MACS_peak_955	73.82	Intron (uc010qbi.2/10659, intron 1 of 7)	10	11059893	11378672	318780	1	10659	uc001ikl.4	17422	ENSG00000048740	CELF2	CUGBP Elav-like family member 2
chr10	11206420	11207213	794	*	MACS_peak_956	100.5	Promoter (<=1kb)	10	11206993	11330515	123523	1	10659	uc010qbk.1	0	ENSG00000048740	CELF2	CUGBP Elav-like family member 2
chr10	11252257	11253171	915	*	MACS_peak_957	50.39	Intron (uc010qbi.2/10659, intron 2 of 7)	10	11207449	11374605	167157	1	10659	uc010qbp.1	44808	ENSG00000048740	CELF2	CUGBP Elav-like family member 2
chr10	11916804	11917221	418	*	MACS_peak_959	62.39	Intron (uc001iky.2/219731, intron 2 of 5)	10	11891607	11936709	45103	2	219731	uc001iky.2	19488	ENSG00000225778	PROSER2-AS1	PROSER2 antisense RNA 1
chr10	12084962	12085582	621	*	MACS_peak_960	67.11	Promoter (<=1kb)	10	11962021	12085169	123149	2	26019	uc001ilc.3	0	ENSG00000151461	UPF2	UPF2, regulator of nonsense mediated mRNA decay
chr10	13811717	13812477	761	*	MACS_peak_961	95.81	Intron (uc001ims.3/55691, intron 6 of 24)	10	13629006	13697929	68924	1	8559	uc001imq.3	182711	ENSG00000165630	PRPF18	pre-mRNA processing factor 18
chr10	14668172	14668503	332	*	MACS_peak_963	63.51	Intron (uc001ina.1/83641, intron 2 of 4)	10	14560559	14646417	85859	2	83641	uc001imz.1	-21755	ENSG00000065809	FAM107B	family with sequence similarity 107 member B
chr10	14978405	14979097	693	*	MACS_peak_964	111.25	Promoter (1-2kb)	10	14964980	14976774	11795	2	64421	uc009xjj.1	-1631	ENSG00000152457	DCLRE1C	DNA cross-link repair 1C
chr10	15001559	15002088	530	*	MACS_peak_965	75.76	Promoter (<=1kb)	10	15001438	15014850	13413	1	644890	uc009xjk.1	121	ENSG00000197889	MEIG1	meiosis/spermiogenesis associated 1
chr10	15892641	15892930	290	*	MACS_peak_966	61.01	Intron (uc001iod.1/80013, intron 1 of 14)	10	15820175	15902519	82345	2	80013	uc001iod.1	9589	ENSG00000148481	MINDY3	MINDY lysine 48 deubiquitinase 3
chr10	17028047	17028902	856	*	MACS_peak_967	86.25	Intron (uc001ioo.3/8029, intron 29 of 66)	10	16911635	16949747	38113	2	8029	uc009xjr.1	-78300	ENSG00000107611	CUBN	cubilin
chr10	17243187	17243703	517	*	MACS_peak_968	53.11	Promoter (<=1kb)	10	17184982	17244070	59089	2	1787	uc001iop.3	367	ENSG00000107614	TRDMT1	tRNA aspartic acid methyltransferase 1
chr10	17707684	17708404	721	*	MACS_peak_971	113.65	Intron (uc001ipj.2/8027, intron 2 of 13)	10	17686124	17758821	72698	1	8027	uc010qcf.2	21560	ENSG00000136738	STAM	signal transducing adaptor molecule
chr10	17713145	17713689	545	*	MACS_peak_972	74.74	Intron (uc001ipj.2/8027, intron 2 of 13)	10	17737048	17758821	21774	1	8027	uc009xjw.2	-23359	ENSG00000136738	STAM	signal transducing adaptor molecule
chr10	18289581	18289958	378	*	MACS_peak_973	70.61	Exon (uc001ipn.2/221074, exon 10 of 12)	10	18290715	18299491	8777	2	100129213	uc001ipq.1	9533	ENSG00000226083	SLC39A12-AS1	SLC39A12 antisense RNA 1
chr10	18610317	18610996	680	*	MACS_peak_974	68.75	Intron (uc001ipr.2/783, intron 2 of 13)	10	18629614	18807345	177732	1	783	uc009xkb.1	-18618	ENSG00000165995	CACNB2	calcium voltage-gated channel auxiliary subunit beta 2
chr10	18947982	18948498	517	*	MACS_peak_975	94.27	Promoter (<=1kb)	10	18948313	18966940	18628	1	221079	uc001iqd.1	0	ENSG00000165997	ARL5B	ADP ribosylation factor like GTPase 5B
chr10	20446919	20447563	645	*	MACS_peak_976	79.77	Intron (uc001iqg.1/84898, intron 6 of 13)	10	20432224	20569115	136892	1	84898	uc009xkc.1	14695	ENSG00000120594	PLXDC2	plexin domain containing 2
chr10	22004389	22004882	494	*	MACS_peak_978	63.35	Intron (uc001iqs.3/8028, intron 15 of 23)	10	21962570	22032559	69990	1	8028	uc001irb.3	41819	ENSG00000078403	MLLT10	MLLT10, histone lysine methyltransferase DOT1L cofactor
chr10	22937411	22937933	523	*	MACS_peak_979	74.2	Intron (uc001irl.4/5305, intron 1 of 9)	10	22823766	22880710	56945	2	5305	uc010qcu.2	-56701	ENSG00000150867	PIP4K2A	phosphatidylinositol-5-phosphate 4-kinase type 2 alpha
chr10	23326214	23326860	647	*	MACS_peak_982	73.46	3' UTR	10	23384427	23410942	26516	1	22921	uc001iro.3	-57567	ENSG00000148450	MSRB2	methionine sulfoxide reductase B2
chr10	23405675	23406179	505	*	MACS_peak_983	113.23	Intron (uc001iro.3/22921, intron 3 of 4)	10	23384427	23410942	26516	1	22921	uc001iro.3	21248	ENSG00000148450	MSRB2	methionine sulfoxide reductase B2
chr10	23634735	23635291	557	*	MACS_peak_984	54.56	Promoter (<=1kb)	10	23605520	23633772	28253	2	256815	uc010qcx.2	-963	ENSG00000179133	C10orf67	chromosome 10 open reading frame 67
chr10	24271476	24271683	208	*	MACS_peak_986	102.78	Intron (uc001irs.3/56243, intron 1 of 18)	10	24497720	24836772	339053	1	56243	uc001irt.4	-226037	ENSG00000120549	KIAA1217	KIAA1217
chr10	25305600	25306196	597	*	MACS_peak_987	57.94	Promoter (<=1kb)	10	25305508	25315593	10086	1	79896	uc001isi.4	92	ENSG00000185875	THNSL1	threonine synthase like 1
chr10	27026505	27027060	556	*	MACS_peak_990	59.46	Intron (uc001isv.3/23590, intron 10 of 11)	10	27023464	27035726	12263	1	23590	uc010qdf.2	3041	ENSG00000148459	PDSS1	decaprenyl diphosphate synthase subunit 1
chr10	27481218	27481640	423	*	MACS_peak_992	77.58	Downstream (2-3kb)	10	27443753	27475848	32096	1	84930	uc009xkx.2	37465	ENSG00000120539	MASTL	microtubule associated serine/threonine kinase like
chr10	27528994	27529571	578	*	MACS_peak_993	77.98	Promoter (<=1kb)	10	27484143	27529808	45666	2	91452	uc010qdm.3	237	ENSG00000107897	ACBD5	acyl-CoA binding domain containing 5
chr10	28875090	28875491	402	*	MACS_peak_994	53.81	Intron (uc001iud.3/51322, intron 4 of 13)	10	28835325	28835346	22	1	100847088	uc031ptp.1	39765	ENSG00000263629	MIR5586	microRNA 5586
chr10	29760235	29760884	650	*	MACS_peak_1007	93.44	Intron (uc001iup.3/387647, intron 2 of 2)	10	29769090	29785447	16358	2	6840	uc009xlc.2	24563	ENSG00000197321	SVIL	supervillin
chr10	29823942	29824594	653	*	MACS_peak_1008	64.4	Intron (uc031ptq.1/6840, intron 4 of 33)	10	29833933	29834026	94	2	693189	uc021por.1	9432	ENSG00000207612	MIR604	microRNA 604
chr10	29844750	29845197	448	*	MACS_peak_1009	147.52	Promoter (<=1kb)	10	29746277	29844037	97761	2	6840	uc031ptq.1	-713	ENSG00000197321	SVIL	supervillin
chr10	29878751	29879703	953	*	MACS_peak_1010	61.16	Intron (uc001iut.1/6840, intron 1 of 37)	10	29891193	29891275	83	2	100126327	uc021pos.1	11572	ENSG00000216035	MIR938	microRNA 938
chr10	29947965	29948718	754	*	MACS_peak_1011	74.62	Intron (uc001iuu.1/6840, intron 2 of 35)	10	29746277	29923901	177625	2	6840	uc001iut.1	-24064	ENSG00000197321	SVIL	supervillin
chr10	30403789	30404139	351	*	MACS_peak_1013	56.41	Promoter (<=1kb)	10	30301729	30404420	102692	2	57608	uc001iuz.3	281	ENSG00000165757	JCAD	junctional cadherin 5 associated
chr10	30637782	30638270	489	*	MACS_peak_1014	114.95	Promoter (<=1kb)	10	30598730	30638267	39538	2	55149	uc001iva.4	0	ENSG00000107951	MTPAP	mitochondrial poly(A) polymerase
chr10	31269922	31270259	338	*	MACS_peak_1015	99.16	Intron (uc001ivn.3/220929, intron 2 of 7)	10	31133565	31288446	154882	2	220929	uc001ivn.3	18187	ENSG00000183621	ZNF438	zinc finger protein 438
chr10	32151485	32151832	348	*	MACS_peak_1017	56.41	Intron (uc001ivy.2/94134, intron 1 of 15)	10	32094326	32197854	103529	2	94134	uc001ivy.2	46022	ENSG00000165322	ARHGAP12	Rho GTPase activating protein 12
chr10	32635235	32635815	581	*	MACS_peak_1018	100.82	Promoter (<=1kb)	10	32556644	32636146	79503	2	80314	uc001iwg.2	331	ENSG00000120616	EPC1	enhancer of polycomb homolog 1
chr10	33247202	33247781	580	*	MACS_peak_1019	55.78	Promoter (<=1kb)	10	33189246	33247293	58048	2	3688	uc001iwt.4	0	ENSG00000150093	ITGB1	integrin subunit beta 1
chr10	34521765	34521969	205	*	MACS_peak_1021	95.84	Intron (uc010qej.2/56288, intron 22 of 24)	10	34606035	34673182	67148	2	56288	uc001ixs.1	151213	ENSG00000148498	PARD3	par-3 family cell polarity regulator
chr10	38260412	38260772	361	*	MACS_peak_1027	54.68	5' UTR	10	38238795	38265453	26659	2	219749	uc001ize.1	4681	ENSG00000175395	ZNF25	zinc finger protein 25
chr10	38299246	38299699	454	*	MACS_peak_1028	69.19	Promoter (<=1kb)	10	38299578	38348995	49418	1	7581	uc001izg.3	0	ENSG00000189180	ZNF33A	zinc finger protein 33A
chr10	43278055	43278376	322	*	MACS_peak_1045	79.27	Promoter (<=1kb)	10	43277954	43330385	52432	1	9790	uc001jaj.3	101	ENSG00000165733	BMS1	BMS1, ribosome biogenesis factor
chr10	43655259	43655669	411	*	MACS_peak_1047	53.27	Intron (uc001jam.2/55454, intron 3 of 4)	10	43633893	43680754	46862	1	55454	uc001jan.4	21366	ENSG00000169826	CSGALNACT2	chondroitin sulfate N-acetylgalactosaminyltransferase 2
chr10	43892520	43892890	371	*	MACS_peak_1048	51.18	Promoter (<=1kb)	10	43881065	43892794	11730	2	3185	uc001jar.2	0	ENSG00000169813	HNRNPF	heterogeneous nuclear ribonucleoprotein F
chr10	43903147	43903616	470	*	MACS_peak_1049	120.48	Promoter (<=1kb)	10	43881065	43903299	22235	2	3185	uc001jas.2	0	ENSG00000169813	HNRNPF	heterogeneous nuclear ribonucleoprotein F
chr10	45359910	45360932	1023	*	MACS_peak_1051	101.02	Intron (uc001jbk.1/220980, intron 2 of 7)	10	45406764	45430642	23879	1	643236	uc001jbn.2	-45832	ENSG00000187783	TMEM72	transmembrane protein 72
chr10	45431045	45431410	366	*	MACS_peak_1052	79.27	Intron (uc001jbk.1/220980, intron 1 of 7)	10	45306472	45455137	148666	2	220980	uc001jbk.1	23727	ENSG00000224812	TMEM72-AS1	TMEM72 antisense RNA 1
chr10	47074508	47075224	717	*	MACS_peak_1053	50.64	Intron (uc001jed.5/653145, intron 2 of 3)	10	47083534	47088320	4787	1	5540	uc001jee.3	-8310	ENSG00000204174	NPY4R	neuropeptide Y receptor Y4
chr10	50747115	50747691	577	*	MACS_peak_1054	52.8	Promoter (<=1kb)	10	50723151	50747169	24019	2	101243544	uc009xoe.4	0	NA	NA	NA
chr10	51039243	51039894	652	*	MACS_peak_1055	75.06	Intron (uc009xoj.3/8505, intron 13 of 14)	10	50950874	50970425	19552	2	55753	uc009xoh.2	-68818	ENSG00000197444	OGDHL	oxoglutarate dehydrogenase like
chr10	52858873	52859636	764	*	MACS_peak_1056	61.81	Intron (uc010qhp.2/5592, intron 1 of 2)	10	52834234	54058110	1223877	1	5592	uc001jjo.3	24639	ENSG00000185532	PRKG1	protein kinase, cGMP-dependent, type I
chr10	52927929	52928497	569	*	MACS_peak_1057	50.77	Intron (uc010qhp.2/5592, intron 2 of 2)	10	52834234	54058110	1223877	1	5592	uc001jjo.3	93695	ENSG00000185532	PRKG1	protein kinase, cGMP-dependent, type I
chr10	53678619	53679064	446	*	MACS_peak_1058	69.71	Intron (uc001jjm.3/5592, intron 5 of 17)	10	53806624	54058110	251487	1	5592	uc009xow.2	-127560	ENSG00000185532	PRKG1	protein kinase, cGMP-dependent, type I
chr10	56943673	56944102	430	*	MACS_peak_1060	103.95	Intron (uc001jjv.1/65217, intron 2 of 20)	10	55754340	56561051	806712	2	65217	uc001jjw.3	-382622	ENSG00000150275	PCDH15	protocadherin related 15
chr10	60586575	60587114	540	*	MACS_peak_1065	86.99	Intron (uc001jki.1/80114, intron 20 of 20)	10	60553244	60574074	20831	1	80114	uc001jkj.1	33331	ENSG00000122870	BICC1	BicC family RNA binding protein 1
chr10	62060211	62060589	379	*	MACS_peak_1068	56.41	Intron (uc001jky.3/288, intron 1 of 43)	10	61786056	62149634	363579	2	288	uc001jky.3	89045	ENSG00000151150	ANK3	ankyrin 3
chr10	62537944	62538438	495	*	MACS_peak_1069	55.11	Promoter (<=1kb)	10	62538089	62547988	9900	1	983	uc010qii.2	0	ENSG00000170312	CDK1	cyclin dependent kinase 1
chr10	62692486	62692962	477	*	MACS_peak_1071	94.85	Intron (uc009xpe.2/9886, intron 1 of 8)	10	62629198	62701612	72415	2	9886	uc009xpe.2	8650	ENSG00000072422	RHOBTB1	Rho related BTB domain containing 1
chr10	63734352	63734819	468	*	MACS_peak_1075	86.54	Promoter (1-2kb)	10	63736061	63736088	28	1	100847083	uc021prj.2	-1242	ENSG00000263750	MIR548AV	microRNA 548av
chr10	63778198	63778574	377	*	MACS_peak_1076	56.41	Intron (uc010qil.2/84159, intron 4 of 4)	10	63808970	63856707	47738	1	84159	uc001jlu.2	-30396	ENSG00000150347	ARID5B	AT-rich interaction domain 5B
chr10	63803145	63803633	489	*	MACS_peak_1077	57.91	Intron (uc010qil.2/84159, intron 4 of 4)	10	63808970	63856707	47738	1	84159	uc001jlu.2	-5337	ENSG00000150347	ARID5B	AT-rich interaction domain 5B
chr10	64258076	64258433	358	*	MACS_peak_1078	61.01	Intron (uc001jmc.2/22891, intron 4 of 7)	10	64280207	64431771	151565	1	22891	uc001jmd.1	-21774	ENSG00000138311	ZNF365	zinc finger protein 365
chr10	64564004	64564658	655	*	MACS_peak_1080	66.68	Promoter (<=1kb)	10	64564516	64568239	3724	1	84890	uc001jmg.3	0	ENSG00000181915	ADO	2-aminoethanethiol dioxygenase
chr10	64892594	64893326	733	*	MACS_peak_1083	51.17	Promoter (<=1kb)	10	64893007	64914786	21780	1	29982	uc001jmj.4	0	ENSG00000148572	NRBF2	nuclear receptor binding factor 2
chr10	64897191	64897478	288	*	MACS_peak_1084	96.74	Intron (uc001jmj.4/29982, intron 1 of 3)	10	64893007	64914786	21780	1	29982	uc010qip.2	4184	ENSG00000148572	NRBF2	nuclear receptor binding factor 2
chr10	65012435	65012945	511	*	MACS_peak_1085	133.87	Intron (uc001jml.3/221037, intron 1 of 22)	10	64926988	65028982	101995	2	221037	uc001jml.3	16037	ENSG00000171988	JMJD1C	jumonji domain containing 1C
chr10	65028964	65029231	268	*	MACS_peak_1086	106.76	Promoter (<=1kb)	10	64926988	65028982	101995	2	221037	uc001jml.3	0	ENSG00000171988	JMJD1C	jumonji domain containing 1C
chr10	65365341	65365603	263	*	MACS_peak_1088	91.19	Intron (uc001jmt.3/221035, intron 5 of 7)	10	65281123	65384883	103761	1	221035	uc001jmt.3	84218	ENSG00000165476	REEP3	receptor accessory protein 3
chr10	68736991	68737392	402	*	MACS_peak_1090	62.66	Intron (uc001jmz.1/347731, intron 2 of 2)	10	68685792	68860867	175076	1	347731	uc001jmz.1	51199	ENSG00000198739	LRRTM3	leucine rich repeat transmembrane neuronal 3
chr10	69644170	69644576	407	*	MACS_peak_1091	66.06	Promoter (<=1kb)	10	69644427	69678147	33721	1	23411	uc001jnd.3	0	ENSG00000096717	SIRT1	sirtuin 1
chr10	69932192	69932563	372	*	MACS_peak_1092	63.51	Intron (uc001jnm.5/84665, intron 11 of 20)	10	69990352	69991870	1519	2	220202	uc001jnq.3	59307	ENSG00000179774	ATOH7	atonal bHLH transcription factor 7
chr10	70480607	70481002	396	*	MACS_peak_1094	51.48	Promoter (<=1kb)	10	70480971	70531202	50232	1	55749	uc001jol.1	0	ENSG00000060339	CCAR1	cell division cycle and apoptosis regulator 1
chr10	70883454	70884102	649	*	MACS_peak_1095	88.99	Promoter (<=1kb)	10	70883908	70932616	48709	1	9559	uc001jpb.3	0	ENSG00000122958	VPS26A	VPS26, retromer complex component A
chr10	70939368	70939875	508	*	MACS_peak_1096	98.46	Promoter (<=1kb)	10	70939993	70968849	28857	1	6832	uc001jpe.1	-118	ENSG00000156502	SUPV3L1	Suv3 like RNA helicase
chr10	71002613	71002903	291	*	MACS_peak_1097	66.25	Intron (uc001jpf.4/80201, intron 6 of 17)	10	70992759	71027315	34557	1	80201	uc010qje.2	9854	ENSG00000156510	HKDC1	hexokinase domain containing 1
chr10	71038136	71038702	567	*	MACS_peak_1098	54.12	Intron (uc009xqc.2/3098, intron 1 of 5)	10	71029756	71161637	131882	1	3098	uc001jpj.4	8380	ENSG00000156515	HK1	hexokinase 1
chr10	71254300	71255042	743	*	MACS_peak_1099	51.38	Intron (uc001jpo.1/23555, intron 3 of 7)	10	71211226	71267423	56198	1	23555	uc001jpo.1	43074	ENSG00000099282	TSPAN15	tetraspanin 15
chr10	72015133	72016048	916	*	MACS_peak_1100	59.22	Exon (uc021psj.1/64106, exon 4 of 4)	10	71962586	71993190	30605	2	5464	uc001jqv.1	-21943	ENSG00000180817	PPA1	pyrophosphatase (inorganic) 1
chr10	73610739	73611115	377	*	MACS_peak_1104	56.72	Promoter (<=1kb)	10	73576055	73611082	35028	2	5660	uc001jsm.3	0	ENSG00000197746	PSAP	prosaposin
chr10	73619833	73620821	989	*	MACS_peak_1105	80.37	Promoter (<=1kb)	10	73621147	73995618	374472	1	119504	uc021psn.1	-326	ENSG00000166295	ANAPC16	anaphase promoting complex subunit 16
chr10	73627943	73628287	345	*	MACS_peak_1106	58.73	Intron (uc021psn.1/119504, intron 1 of 3)	10	73621147	73995618	374472	1	119504	uc021psn.1	6796	ENSG00000166295	ANAPC16	anaphase promoting complex subunit 16
chr10	73648661	73649112	452	*	MACS_peak_1107	55.41	Intron (uc021psn.1/119504, intron 1 of 3)	10	73621147	73995618	374472	1	119504	uc021psn.1	27514	ENSG00000166295	ANAPC16	anaphase promoting complex subunit 16
chr10	73671045	73671514	470	*	MACS_peak_1108	59.04	Intron (uc021psn.1/119504, intron 1 of 3)	10	73621147	73995618	374472	1	119504	uc021psn.1	49898	ENSG00000166295	ANAPC16	anaphase promoting complex subunit 16
chr10	73680499	73681069	571	*	MACS_peak_1109	56.22	Intron (uc021psn.1/119504, intron 1 of 3)	10	73724120	73773322	49203	1	9469	uc001jsn.3	-43051	ENSG00000122863	CHST3	carbohydrate sulfotransferase 3
chr10	73740661	73741649	989	*	MACS_peak_1110	98.19	Intron (uc021psn.1/119504, intron 1 of 3)	10	73724120	73773322	49203	1	9469	uc001jsn.3	16541	ENSG00000122863	CHST3	carbohydrate sulfotransferase 3
chr10	73746742	73747319	578	*	MACS_peak_1111	50.44	Intron (uc021psn.1/119504, intron 1 of 3)	10	73724120	73773322	49203	1	9469	uc001jsn.3	22622	ENSG00000122863	CHST3	carbohydrate sulfotransferase 3
chr10	74033248	74033847	600	*	MACS_peak_1113	51.21	Promoter (<=1kb)	10	74033677	74035797	2121	1	54541	uc001jsx.1	0	ENSG00000168209	DDIT4	DNA damage inducible transcript 4
chr10	74247150	74248035	886	*	MACS_peak_1114	70.64	Intron (uc021pth.1/100302155, intron 1 of 1)	10	74127084	74283744	156661	2	10367	uc010qjw.2	35709	ENSG00000107745	MICU1	mitochondrial calcium uptake 1
chr10	74385698	74385997	300	*	MACS_peak_1115	99.16	Promoter (<=1kb)	10	74127084	74385949	258866	2	10367	uc001jtb.2	0	ENSG00000107745	MICU1	mitochondrial calcium uptake 1
chr10	74927609	74927905	297	*	MACS_peak_1116	72.73	Promoter (<=1kb)	10	74894282	74927853	33572	2	11319	uc001jtn.3	0	ENSG00000122882	ECD	ecdysoneless cell cycle regulator
chr10	75012039	75012782	744	*	MACS_peak_1117	82.48	Promoter (<=1kb)	10	75006446	75012451	6006	2	51021	uc010qkh.1	0	ENSG00000182180	MRPS16	mitochondrial ribosomal protein S16
chr10	75312913	75313384	472	*	MACS_peak_1118	56.45	Promoter (<=1kb)	10	75257296	75313098	55803	2	159195	uc001jun.3	0	ENSG00000166348	USP54	ubiquitin specific peptidase 54
chr10	75351016	75351289	274	*	MACS_peak_1119	89.22	Promoter (<=1kb)	10	75288947	75351298	62352	2	159195	uc010qkl.1	9	ENSG00000166348	USP54	ubiquitin specific peptidase 54
chr10	75617073	75617611	539	*	MACS_peak_1120	52.09	Intron (uc001jvm.2/818, intron 3 of 20)	10	75574761	75601969	27209	2	818	uc009xrp.1	-15104	ENSG00000148660	CAMK2G	calcium/calmodulin dependent protein kinase II gamma
chr10	75936028	75936890	863	*	MACS_peak_1122	98.94	Promoter (<=1kb)	10	75936247	76469061	532815	1	132	uc001jwj.3	0	ENSG00000156110	ADK	adenosine kinase
chr10	76686856	76687285	430	*	MACS_peak_1123	52.16	Intron (uc001jwm.2/23522, intron 3 of 17)	10	76586171	76792380	206210	1	23522	uc031pvy.1	100685	ENSG00000156650	KAT6B	lysine acetyltransferase 6B
chr10	76969938	76970358	421	*	MACS_peak_1124	64.92	Promoter (<=1kb)	10	76970300	76991207	20908	1	7417	uc001jwz.3	0	ENSG00000165637	VDAC2	voltage dependent anion channel 2
chr10	77054297	77054874	578	*	MACS_peak_1125	67.02	Promoter (1-2kb)	10	77056141	77121436	65296	1	253264	uc001jxd.2	-1267	ENSG00000226051	ZNF503-AS1	ZNF503 antisense RNA 1
chr10	77161780	77162604	825	*	MACS_peak_1126	69.63	Promoter (<=1kb)	10	77157603	77161513	3911	2	84858	uc001jxg.3	-267	ENSG00000165655	ZNF503	zinc finger protein 503
chr10	77548118	77548413	296	*	MACS_peak_1131	69.3	Intron (uc001jxi.3/83938, intron 1 of 5)	10	77542519	78317126	774608	1	83938	uc001jxi.3	5599	ENSG00000148655	LRMDA	leucine rich melanocyte differentiation associated
chr10	77862876	77863452	577	*	MACS_peak_1132	83.49	Intron (uc001jxi.3/83938, intron 4 of 5)	10	77542519	78317126	774608	1	83938	uc001jxi.3	320357	ENSG00000148655	LRMDA	leucine rich melanocyte differentiation associated
chr10	78269332	78269661	330	*	MACS_peak_1133	58.73	Intron (uc001jxi.3/83938, intron 5 of 5)	10	78643874	78870101	226228	2	3778	uc001jxl.1	600440	ENSG00000156113	KCNMA1	potassium calcium-activated channel subfamily M alpha 1
chr10	78789335	78789853	519	*	MACS_peak_1135	69.18	Intron (uc001jxj.2/3778, intron 15 of 28)	10	78643874	78870101	226228	2	3778	uc001jxl.1	80248	ENSG00000156113	KCNMA1	potassium calcium-activated channel subfamily M alpha 1
chr10	78985242	78985719	478	*	MACS_peak_1136	58.56	Intron (uc001jxj.2/3778, intron 3 of 28)	10	78637358	78943290	305933	2	3778	uc001jxk.1	-41952	ENSG00000156113	KCNMA1	potassium calcium-activated channel subfamily M alpha 1
chr10	79291248	79291693	446	*	MACS_peak_1137	51.27	Intron (uc001jxj.2/3778, intron 1 of 28)	10	78629359	79397577	768219	2	3778	uc001jxj.2	105884	ENSG00000156113	KCNMA1	potassium calcium-activated channel subfamily M alpha 1
chr10	79608819	79609419	601	*	MACS_peak_1138	57.63	Intron (uc001jzj.3/9231, intron 1 of 26)	10	79550549	79613295	62747	2	9231	uc001jzj.3	3876	ENSG00000151208	DLG5	discs large MAGUK scaffold protein 5
chr10	80015755	80016154	400	*	MACS_peak_1139	56.41	Intron (uc010qlp.2/100132987, intron 1 of 3)	10	80008382	80311112	302731	1	100132987	uc010qlp.2	7373	ENSG00000230417	LINC00856	long intergenic non-protein coding RNA 856
chr10	80053286	80053803	518	*	MACS_peak_1140	70.98	Intron (uc010qlp.2/100132987, intron 1 of 3)	10	80027085	80159502	132418	1	414243	uc001jzw.2	26201	ENSG00000230417	LINC00595	long intergenic non-protein coding RNA 595
chr10	80734391	80734797	407	*	MACS_peak_1142	65.06	Intron (uc001jzx.3/283050, intron 4 of 7)	10	80703083	80827205	124123	2	283050	uc001jzx.3	92408	ENSG00000224596	ZMIZ1-AS1	ZMIZ1 antisense RNA 1
chr10	80983147	80983798	652	*	MACS_peak_1143	63.26	Intron (uc001kaf.2/57178, intron 7 of 24)	10	81003425	81076285	72861	1	57178	uc001kag.2	-19627	ENSG00000108175	ZMIZ1	zinc finger MIZ-type containing 1
chr10	80999026	80999447	422	*	MACS_peak_1144	73.58	Intron (uc001kaf.2/57178, intron 7 of 24)	10	81003425	81076285	72861	1	57178	uc001kag.2	-3978	ENSG00000108175	ZMIZ1	zinc finger MIZ-type containing 1
chr10	81158961	81159477	517	*	MACS_peak_1145	88.65	Intron (uc010qlr.2/219654, intron 2 of 3)	10	81142083	81203928	61846	2	219654	uc010qlr.2	44451	ENSG00000165424	ZCCHC24	zinc finger CCHC-type containing 24
chr10	81197793	81198245	453	*	MACS_peak_1146	91.55	Intron (uc010qlr.2/219654, intron 1 of 3)	10	81142083	81203928	61846	2	219654	uc010qlr.2	5683	ENSG00000165424	ZCCHC24	zinc finger CCHC-type containing 24
chr10	81918248	81918884	637	*	MACS_peak_1149	58.33	Exon (uc010qlx.1/311, exon 10 of 13)	10	81914880	81931076	16197	2	311	uc010qlx.1	12192	ENSG00000122359	ANXA11	annexin A11
chr10	82213431	82213734	304	*	MACS_peak_1150	71.84	Promoter (<=1kb)	10	82214038	82282391	68354	1	81619	uc001kci.4	-304	ENSG00000108219	TSPAN14	tetraspanin 14
chr10	82223984	82224846	863	*	MACS_peak_1151	94.31	Intron (uc001kci.4/81619, intron 1 of 7)	10	82214038	82282391	68354	1	81619	uc009xss.3	9946	ENSG00000108219	TSPAN14	tetraspanin 14
chr10	82231926	82232456	531	*	MACS_peak_1152	57.02	Intron (uc001kci.4/81619, intron 1 of 7)	10	82214038	82282391	68354	1	81619	uc009xss.3	17888	ENSG00000108219	TSPAN14	tetraspanin 14
chr10	82259440	82260270	831	*	MACS_peak_1153	60.44	Intron (uc001kci.4/81619, intron 2 of 7)	10	82297658	82406316	108659	1	387694	uc001kck.1	-37388	ENSG00000178217	SH2D4B	SH2 domain containing 4B
chr10	83674373	83675284	912	*	MACS_peak_1155	76.55	Intron (uc001kco.2/10718, intron 1 of 8)	10	83637717	84746935	1109219	1	10718	uc021pvi.1	36656	ENSG00000185737	NRG3	neuregulin 3
chr10	83950346	83950892	547	*	MACS_peak_1156	57.44	Intron (uc001kco.2/10718, intron 1 of 8)	10	84118495	84746935	628441	1	10718	uc021pvk.1	-167603	ENSG00000185737	NRG3	neuregulin 3
chr10	84155300	84155789	490	*	MACS_peak_1157	66.98	Intron (uc001kco.2/10718, intron 2 of 8)	10	84118495	84746935	628441	1	10718	uc021pvk.1	36805	ENSG00000185737	NRG3	neuregulin 3
chr10	84502071	84502800	730	*	MACS_peak_1158	56.76	Intron (uc001kco.2/10718, intron 3 of 8)	10	84559498	84746935	187438	1	10718	uc001kcr.2	-56698	ENSG00000185737	NRG3	neuregulin 3
chr10	86004227	86004908	682	*	MACS_peak_1160	109.55	Promoter (<=1kb)	10	86004809	86010273	5465	1	5995	uc001kdb.1	0	ENSG00000148604	RGR	retinal G protein coupled receptor
chr10	88438734	88439189	456	*	MACS_peak_1163	93.94	5' UTR	10	88428426	88495824	67399	1	11155	uc009xsz.3	10308	ENSG00000122367	LDB3	LIM domain binding 3
chr10	88600034	88600783	750	*	MACS_peak_1164	73.71	Intron (uc001kdy.3/657, intron 2 of 12)	10	88516396	88684945	168550	1	657	uc001kdy.3	83638	ENSG00000107779	BMPR1A	bone morphogenetic protein receptor type 1A
chr10	88855136	88855691	556	*	MACS_peak_1165	59.97	Promoter (<=1kb)	10	88854953	88951222	96270	1	54537	uc001kei.4	183	ENSG00000122376	FAM35A	family with sequence similarity 35 member A
chr10	89577400	89577880	481	*	MACS_peak_1166	76.39	Promoter (<=1kb)	10	89512875	89577917	65043	2	84896	uc001kez.1	37	ENSG00000138138	ATAD1	ATPase family, AAA domain containing 1
chr10	89972780	89973709	930	*	MACS_peak_1168	62.11	Intron (uc010qms.1/55328, intron 5 of 5)	10	90043859	90305279	261421	2	55328	uc009xtj.3	331570	ENSG00000184719	RNLS	renalase, FAD dependent amine oxidase
chr10	90297768	90298219	452	*	MACS_peak_1169	63.43	Intron (uc010qms.1/55328, intron 2 of 5)	10	90043859	90305279	261421	2	55328	uc009xtj.3	7060	ENSG00000184719	RNLS	renalase, FAD dependent amine oxidase
chr10	91011628	91012008	381	*	MACS_peak_1170	99.16	Promoter (<=1kb)	10	90973326	91011660	38335	2	3988	uc001kga.4	0	ENSG00000107798	LIPA	lipase A, lysosomal acid type
chr10	91087612	91088146	535	*	MACS_peak_1171	65.01	Promoter (<=1kb)	10	91087602	91100725	13124	1	3437	uc001kgf.3	10	ENSG00000119917	IFIT3	interferon induced protein with tetratricopeptide repeats 3
chr10	91112005	91112275	271	*	MACS_peak_1172	73.24	Intron (uc001kgb.4/3988, intron 2 of 8)	10	91092239	91100725	8487	1	3437	uc001kgg.3	19766	ENSG00000119917	IFIT3	interferon induced protein with tetratricopeptide repeats 3
chr10	92535067	92535610	544	*	MACS_peak_1173	76.64	Intron (uc001kgz.3/3363, intron 1 of 2)	10	92500576	92617671	117096	2	3363	uc001kgz.3	82061	ENSG00000148680	HTR7	5-hydroxytryptamine receptor 7
chr10	92631732	92632336	605	*	MACS_peak_1174	62.76	Promoter (<=1kb)	10	92631474	92668312	36839	1	10556	uc001khd.2	258	ENSG00000148688	RPP30	ribonuclease P/MRP subunit p30
chr10	93331176	93331900	725	*	MACS_peak_1178	60.21	Intron (uc010qnl.2/100188947, intron 1 of 4)	10	93066719	93371217	304499	2	100188947	uc010qnl.2	39317	NA	HECTD2-AS1	HECTD2 antisense RNA 1
chr10	93373168	93373701	534	*	MACS_peak_1179	65.07	Promoter (1-2kb)	10	93066719	93371217	304499	2	100188947	uc010qnl.2	-1951	NA	HECTD2-AS1	HECTD2 antisense RNA 1
chr10	93870034	93870574	541	*	MACS_peak_1181	95.62	Intron (uc001khu.2/22849, intron 6 of 8)	10	93808397	94000118	191722	2	22849	uc001khu.2	129544	ENSG00000107864	CPEB3	cytoplasmic polyadenylation element binding protein 3
chr10	94831486	94832080	595	*	MACS_peak_1184	57.95	Promoter (1-2kb)	10	94833232	94837641	4410	1	1592	uc001kik.1	-1152	ENSG00000095596	CYP26A1	cytochrome P450 family 26 subfamily A member 1
chr10	95225386	95225873	488	*	MACS_peak_1185	88.23	Intron (uc001kin.3/26509, intron 1 of 53)	10	95066186	95242074	175889	2	26509	uc001kin.3	16201	ENSG00000138119	MYOF	myoferlin
chr10	95461867	95462623	757	*	MACS_peak_1186	58.64	Promoter (<=1kb)	10	95427640	95462329	34690	2	118924	uc001kiv.2	0	ENSG00000148690	FRA10AC1	FRA10A associated CGG repeat 1
chr10	97284832	97285261	430	*	MACS_peak_1188	54.75	Intron (uc001kku.3/10580, intron 1 of 25)	10	97071530	97321171	249642	2	10580	uc001kku.3	35910	ENSG00000095637	SORBS1	sorbin and SH3 domain containing 1
chr10	98633642	98634038	397	*	MACS_peak_1192	56.41	Intron (uc001kmr.3/84458, intron 2 of 8)	10	98592712	98724198	131487	1	84458	uc001kmu.2	40930	ENSG00000196233	LCOR	ligand dependent nuclear receptor corepressor
chr10	98755592	98756345	754	*	MACS_peak_1193	55.18	Downstream (1-2kb)	10	98741041	98745585	4545	1	26148	uc001kmv.3	14551	NA	NA	NA
chr10	98956984	98957392	409	*	MACS_peak_1194	55.98	Intron (uc001kmy.3/100533184, intron 11 of 14)	10	98791363	98945683	154321	2	6585	uc009xvh.1	-11301	ENSG00000187122	SLIT1	slit guidance ligand 1
chr10	99258296	99258752	457	*	MACS_peak_1196	55.1	Promoter (<=1kb)	10	99218081	99258366	40286	2	64210	uc001kns.4	0	ENSG00000155229	MMS19	MMS19 homolog, cytosolic iron-sulfur assembly component
chr10	99302850	99303319	470	*	MACS_peak_1197	54.31	Intron (uc001knv.1/80019, intron 1 of 2)	10	99332256	99343641	11386	1	26287	uc001knw.3	-28937	ENSG00000165887	ANKRD2	ankyrin repeat domain 2
chr10	99334487	99335055	569	*	MACS_peak_1198	64.74	Promoter (2-3kb)	10	99332256	99343641	11386	1	26287	uc009xvu.3	2231	ENSG00000165887	ANKRD2	ankyrin repeat domain 2
chr10	99408815	99409128	314	*	MACS_peak_1199	76.64	Promoter (1-2kb)	10	99410698	99436187	25490	1	55361	uc009xvw.2	-1570	ENSG00000155252	PI4K2A	phosphatidylinositol 4-kinase type 2 alpha
chr10	99520576	99521416	841	*	MACS_peak_1201	73.88	3' UTR	10	99526508	99531756	5249	2	6425	uc001kor.4	10340	ENSG00000120057	SFRP5	secreted frizzled related protein 5
chr10	99642042	99642625	584	*	MACS_peak_1203	61.93	Exon (uc001kou.2/55118, exon 13 of 15)	10	99609995	99631335	21341	1	401647	uc001kos.3	32047	ENSG00000155265	GOLGA7B	golgin A7 family member B
chr10	99649329	99649818	490	*	MACS_peak_1204	178.13	Intron (uc001kot.2/55118, intron 9 of 11)	10	99609995	99631335	21341	1	401647	uc001kos.3	39334	ENSG00000155265	GOLGA7B	golgin A7 family member B
chr10	99912766	99913989	1224	*	MACS_peak_1205	107.73	Intron (uc001kow.4/27291, intron 1 of 8)	10	99894381	100004654	110274	1	27291	uc009xvy.3	18385	ENSG00000166024	R3HCC1L	R3H domain and coiled-coil containing 1 like
chr10	100006459	100007426	968	*	MACS_peak_1206	148.66	Downstream (<1kb)	10	100007443	100028007	20565	2	84171	uc001kpa.1	20581	ENSG00000138131	LOXL4	lysyl oxidase like 4
chr10	100174765	100175261	497	*	MACS_peak_1209	72.48	Promoter (<=1kb)	10	100143322	100174978	31657	2	84795	uc001kpc.3	0	ENSG00000119943	PYROXD2	pyridine nucleotide-disulphide oxidoreductase domain 2
chr10	100248080	100248599	520	*	MACS_peak_1210	52.97	Intron (uc001kpn.2/60495, intron 10 of 11)	10	100188903	100206704	17802	2	3257	uc001kpl.3	-41376	ENSG00000107521	HPS1	HPS1, biogenesis of lysosomal organelles complex 3 subunit 1
chr10	100270177	100270768	592	*	MACS_peak_1211	83.24	Intron (uc001kpn.2/60495, intron 9 of 11)	10	100188903	100206704	17802	2	3257	uc001kpl.3	-63473	ENSG00000107521	HPS1	HPS1, biogenesis of lysosomal organelles complex 3 subunit 1
chr10	100398494	100399343	850	*	MACS_peak_1212	86.02	Intron (uc001kpn.2/60495, intron 7 of 11)	10	100188903	100206704	17802	2	3257	uc001kpl.3	-191790	ENSG00000107521	HPS1	HPS1, biogenesis of lysosomal organelles complex 3 subunit 1
chr10	100419618	100420178	561	*	MACS_peak_1213	82.06	Intron (uc001kpn.2/60495, intron 6 of 11)	10	100188903	100206704	17802	2	3257	uc001kpl.3	-212914	ENSG00000107521	HPS1	HPS1, biogenesis of lysosomal organelles complex 3 subunit 1
chr10	102067451	102067724	274	*	MACS_peak_1214	76.11	Intron (uc001kqx.1/9033, intron 2 of 15)	10	102033035	102046469	13435	2	282991	uc031pxb.1	-20982	ENSG00000196072	BLOC1S2	biogenesis of lysosomal organelles complex 1 subunit 2
chr10	102132888	102134403	1516	*	MACS_peak_1215	108.58	Promoter (<=1kb)	10	102133333	102148111	14779	1	90271	uc001kqz.4	0	ENSG00000235823	OLMALINC	oligodendrocyte maturation-associated long intergenic non-coding RNA
chr10	102758285	102758937	653	*	MACS_peak_1216	76.43	Promoter (<=1kb)	10	102758141	102767593	9453	1	84445	uc010qpw.2	144	ENSG00000107816	LZTS2	leucine zipper tumor suppressor 2
chr10	103639304	103640246	943	*	MACS_peak_1217	74.38	Intron (uc009xwx.1/79591, intron 6 of 7)	10	103587398	103603677	16280	2	30819	uc010qqi.2	-35627	ENSG00000120049	KCNIP2	potassium voltage-gated channel interacting protein 2
chr10	103877205	103877946	742	*	MACS_peak_1218	104.89	Promoter (2-3kb)	10	103867325	103880210	12886	2	8861	uc009xwz.3	2264	ENSG00000198728	LDB1	LIM domain binding 1
chr10	104005096	104005618	523	*	MACS_peak_1219	56.12	Promoter (<=1kb)	10	104005255	104120733	115479	1	8729	uc001kuw.3	0	ENSG00000107862	GBF1	golgi brefeldin A resistant guanine nucleotide exchange factor 1
chr10	104220822	104221277	456	*	MACS_peak_1220	53.08	Promoter (<=1kb)	10	104221170	104232006	10837	1	79847	uc001kvs.3	0	ENSG00000138111	MFSD13A	major facilitator superfamily domain containing 13A
chr10	104401666	104402057	392	*	MACS_peak_1221	77.72	Promoter (2-3kb)	10	104404252	104418076	13825	1	81603	uc001kvz.2	-2195	ENSG00000171206	TRIM8	tripartite motif containing 8
chr10	104542890	104543280	391	*	MACS_peak_1222	51.48	Intron (uc001kwf.4/54838, intron 1 of 3)	10	104535888	104576021	40134	1	54838	uc001kwe.4	7002	ENSG00000166272	WBP1L	WW domain binding protein 1 like
chr10	104556139	104556468	330	*	MACS_peak_1223	63.51	Intron (uc001kwf.4/54838, intron 1 of 3)	10	104535888	104576021	40134	1	54838	uc001kwe.4	20251	ENSG00000166272	WBP1L	WW domain binding protein 1 like
chr10	104615667	104616189	523	*	MACS_peak_1224	99.44	Promoter (1-2kb)	10	104613967	104624718	10752	1	119032	uc001kwi.2	1700	ENSG00000166275	BORCS7	BLOC-1 related complex subunit 7
chr10	105201681	105202014	334	*	MACS_peak_1225	61.01	Exon (uc001kwy.1/22984, exon 31 of 36)	10	105206543	105212162	5620	2	51063	uc001kxa.3	10148	ENSG00000138172	CALHM2	calcium homeostasis modulator family member 2
chr10	105438768	105439293	526	*	MACS_peak_1226	73.97	Intron (uc010qqr.2/9644, intron 1 of 7)	10	105353784	105428432	74649	2	9644	uc010qqs.1	-10336	ENSG00000107957	SH3PXD2A	SH3 and PX domains 2A
chr10	105487059	105487810	752	*	MACS_peak_1227	110.98	Intron (uc010qqu.1/9644, intron 2 of 11)	10	105353784	105496624	142841	2	9644	uc010qqu.1	8814	ENSG00000107957	SH3PXD2A	SH3 and PX domains 2A
chr10	105560625	105560924	300	*	MACS_peak_1228	58.73	Intron (uc001kxj.1/9644, intron 2 of 13)	10	105506537	105515167	8631	1	100505839	uc001kxk.2	54088	ENSG00000280693	SH3PXD2A-AS1	SH3PXD2A antisense RNA 1
chr10	106088053	106088313	261	*	MACS_peak_1230	76.11	Promoter (<=1kb)	10	106069454	106088750	19297	2	85450	uc001kye.4	437	ENSG00000148841	ITPRIP	inositol 1,4,5-trisphosphate receptor interacting protein
chr10	108701073	108701432	360	*	MACS_peak_1232	106.56	Intron (uc001kyl.3/114815, intron 2 of 26)	10	108333421	108924466	591046	2	114815	uc001kyl.3	223034	ENSG00000108018	SORCS1	sortilin related VPS10 domain containing receptor 1
chr10	108850707	108851412	706	*	MACS_peak_1233	62.39	Intron (uc001kyl.3/114815, intron 1 of 26)	10	108333421	108924466	591046	2	114815	uc001kyl.3	73054	ENSG00000108018	SORCS1	sortilin related VPS10 domain containing receptor 1
chr10	112064669	112065054	386	*	MACS_peak_1238	59.33	Promoter (<=1kb)	10	112052798	112064707	11910	2	10285	uc001kzc.4	0	ENSG00000119953	SMNDC1	survival motor neuron domain containing 1
chr10	112326986	112327474	489	*	MACS_peak_1241	61.85	Promoter (<=1kb)	10	112327449	112364392	36944	1	9126	uc001kze.3	0	ENSG00000108055	SMC3	structural maintenance of chromosomes 3
chr10	112524128	112524877	750	*	MACS_peak_1242	86.43	Intron (uc001kzf.2/282996, intron 1 of 13)	10	112628648	112630662	2015	2	282997	uc010qrd.1	105785	NA	PDCD4-AS1	PDCD4 antisense RNA 1
chr10	112562161	112562693	533	*	MACS_peak_1243	61.17	Intron (uc001kzf.2/282996, intron 7 of 13)	10	112628648	112630662	2015	2	282997	uc010qrd.1	67969	NA	PDCD4-AS1	PDCD4 antisense RNA 1
chr10	114056174	114056435	262	*	MACS_peak_1247	79.27	Intron (uc001kzr.1/6975, intron 6 of 9)	10	114043493	114063070	19578	1	6975	uc001kzr.1	12681	ENSG00000119913	TECTB	tectorin beta
chr10	114391342	114391647	306	*	MACS_peak_1248	60.08	Promoter (2-3kb)	10	114393929	114394013	85	1	100422909	uc021pyf.1	-2282	ENSG00000264763	MIR4295	microRNA 4295
chr10	114492024	114492455	432	*	MACS_peak_1249	67.22	Intron (uc001kzy.3/143187, intron 7 of 7)	10	114393929	114394013	85	1	100422909	uc021pyf.1	98095	ENSG00000264763	MIR4295	microRNA 4295
chr10	114787321	114787829	509	*	MACS_peak_1250	62.49	Intron (uc001lac.4/6934, intron 3 of 13)	10	114799763	114927436	127674	1	6934	uc010qru.2	-11934	ENSG00000148737	TCF7L2	transcription factor 7 like 2
chr10	114794558	114795229	672	*	MACS_peak_1251	61.73	Intron (uc001lac.4/6934, intron 3 of 13)	10	114799763	114927436	127674	1	6934	uc010qru.2	-4534	ENSG00000148737	TCF7L2	transcription factor 7 like 2
chr10	114833302	114833673	372	*	MACS_peak_1252	73.24	Intron (uc001lac.4/6934, intron 4 of 13)	10	114799763	114927436	127674	1	6934	uc010qru.2	33539	ENSG00000148737	TCF7L2	transcription factor 7 like 2
chr10	115483091	115483503	413	*	MACS_peak_1253	71.94	Intron (uc001lam.4/840, intron 4 of 7)	10	115469104	115490668	21565	1	840	uc010qsb.3	13987	ENSG00000165806	CASP7	caspase 7
chr10	115905107	115905602	496	*	MACS_peak_1254	57.43	Promoter (<=1kb)	10	115881974	115904375	22402	2	55088	uc009xyd.1	-732	ENSG00000165813	CCDC186	coiled-coil domain containing 186
chr10	116218707	116219026	320	*	MACS_peak_1255	61.01	Intron (uc021pyu.1/3983, intron 7 of 16)	10	116190869	116251637	60769	2	3983	uc021pyu.1	32611	ENSG00000099204	ABLIM1	actin binding LIM protein 1
chr10	116249314	116249650	337	*	MACS_peak_1256	142.6	Promoter (1-2kb)	10	116190869	116251637	60769	2	3983	uc021pyu.1	1987	ENSG00000099204	ABLIM1	actin binding LIM protein 1
chr10	116451169	116451657	489	*	MACS_peak_1257	105.83	Intron (uc001lbz.1/3983, intron 1 of 1)	10	116200776	116444414	243639	2	3983	uc021pzf.1	-6755	ENSG00000099204	ABLIM1	actin binding LIM protein 1
chr10	116999338	116999903	566	*	MACS_peak_1258	50.9	Intron (uc001lcg.3/26033, intron 9 of 28)	10	117059544	117708496	648953	1	26033	uc010qsm.2	-59641	ENSG00000107518	ATRNL1	attractin like 1
chr10	117821236	117821811	576	*	MACS_peak_1259	58.96	3' UTR	10	117816442	118031819	215378	2	2674	uc001lci.3	210008	ENSG00000151892	GFRA1	GDNF family receptor alpha 1
chr10	118397378	118397809	432	*	MACS_peak_1261	105.81	Intron (uc001lcq.3/5408, intron 11 of 14)	10	118380465	118404654	24190	1	5408	uc001lcq.3	16913	ENSG00000266200	PNLIPRP2	pancreatic lipase related protein 2 (gene/pseudogene)
chr10	118457368	118457703	336	*	MACS_peak_1262	79.27	Intron (uc001lct.3/259217, intron 5 of 11)	10	118423797	118429775	5979	2	143379	uc001lcs.1	-27593	ENSG00000165863	C10orf82	chromosome 10 open reading frame 82
chr10	118574836	118575469	634	*	MACS_peak_1263	58.48	Intron (uc001lcu.3/259217, intron 2 of 13)	10	118609023	118642112	33090	1	387712	uc001lcw.3	-33554	ENSG00000188316	ENO4	enolase family member 4
chr10	120514362	120514956	595	*	MACS_peak_1265	55.6	Promoter (<=1kb)	10	120433634	120514758	81125	2	143384	uc010qst.1	0	ENSG00000151893	CACUL1	CDK2 associated cullin domain 1
chr10	120819109	120819681	573	*	MACS_peak_1267	62.47	Promoter (<=1kb)	10	120819525	120819650	126	2	641451	uc001ldv.3	0	ENSG00000207468	SNORA19	small nucleolar RNA, H/ACA box 19
chr10	120864242	120864714	473	*	MACS_peak_1268	99.98	Promoter (<=1kb)	10	120863611	120897376	33766	1	55855	uc010qsy.2	631	NA	FAM45BP	family with sequence similarity 45, member A pseudogene
chr10	121209491	121210385	895	*	MACS_peak_1269	55.62	Intron (uc001led.3/2869, intron 13 of 15)	10	121137484	121137555	72	1	100616398	uc021pzq.1	72007	ENSG00000265719	MIR4681	microRNA 4681
chr10	121497416	121497732	317	*	MACS_peak_1272	69.3	Intron (uc001len.4/22876, intron 1 of 4)	10	121485559	121588662	103104	1	22876	uc001leo.3	11857	ENSG00000198825	INPP5F	inositol polyphosphate-5-phosphatase F
chr10	121651877	121652641	765	*	MACS_peak_1273	153.75	Promoter (<=1kb)	10	121652085	121704170	52086	1	11196	uc001leu.2	0	ENSG00000107651	SEC23IP	SEC23 interacting protein
chr10	122220261	122220638	378	*	MACS_peak_1276	101.39	Intron (uc010qtd.2/196051, intron 1 of 6)	10	122216466	122349367	132902	1	196051	uc009xzl.1	3795	ENSG00000203805	PLPP4	phospholipid phosphatase 4
chr10	122275866	122276259	394	*	MACS_peak_1277	58.73	Intron (uc010qtd.2/196051, intron 3 of 6)	10	122263091	122349367	86277	1	196051	uc001ley.1	12775	ENSG00000203805	PLPP4	phospholipid phosphatase 4
chr10	123283014	123283546	533	*	MACS_peak_1280	52.37	Intron (uc021pzv.1/2263, intron 5 of 14)	10	123237844	123276986	39143	2	2263	uc001lfg.4	-6028	ENSG00000066468	FGFR2	fibroblast growth factor receptor 2
chr10	123638929	123639365	437	*	MACS_peak_1282	52.34	Intron (uc001lfp.3/11101, intron 7 of 11)	10	123502625	123687546	184922	2	11101	uc001lfp.3	48181	ENSG00000107669	ATE1	arginyltransferase 1
chr10	123640263	123640745	483	*	MACS_peak_1283	51.48	Intron (uc001lfp.3/11101, intron 7 of 11)	10	123502625	123687546	184922	2	11101	uc001lfp.3	46801	ENSG00000107669	ATE1	arginyltransferase 1
chr10	123681216	123681569	354	*	MACS_peak_1284	59.33	Intron (uc001lfp.3/11101, intron 3 of 11)	10	123502625	123687546	184922	2	11101	uc001lfp.3	5977	ENSG00000107669	ATE1	arginyltransferase 1
chr10	124228385	124228928	544	*	MACS_peak_1285	60.59	Intron (uc001lgj.2/5654, intron 1 of 8)	10	124221041	124274424	53384	1	5654	uc001lgj.2	7344	ENSG00000166033	HTRA1	HtrA serine peptidase 1
chr10	126412828	126413877	1050	*	MACS_peak_1289	254.83	Intron (uc001lhu.1/9679, intron 5 of 8)	10	126307863	126432930	125068	2	9679	uc001lhv.1	19053	ENSG00000189319	FAM53B	family with sequence similarity 53 member B
chr10	126745675	126746180	506	*	MACS_peak_1290	98.79	Intron (uc009yak.3/1488, intron 2 of 10)	10	126721352	126721439	88	2	100423041	uc021qan.1	-24236	ENSG00000264572	MIR4296	microRNA 4296
chr10	126850575	126851034	460	*	MACS_peak_1291	54.92	Promoter (<=1kb)	10	126676418	126849624	173207	2	1488	uc001lih.4	-951	ENSG00000175029	CTBP2	C-terminal binding protein 2
chr10	127483577	127483947	371	*	MACS_peak_1293	51.48	Intron (uc001liw.4/7390, intron 7 of 8)	10	127490626	127496056	5431	2	7390	uc021qap.1	12109	ENSG00000188690	UROS	uroporphyrinogen III synthase
chr10	127819987	127820419	433	*	MACS_peak_1294	76.8	Intron (uc001ljk.2/8038, intron 5 of 22)	10	127668730	127698078	29349	1	92565	uc001lji.3	151257	ENSG00000203780	FANK1	fibronectin type III and ankyrin repeat domains 1
chr10	127904347	127905654	1308	*	MACS_peak_1295	225.08	Intron (uc001ljk.2/8038, intron 3 of 22)	10	127702902	128077127	374226	2	8038	uc001ljk.2	171473	ENSG00000148848	ADAM12	ADAM metallopeptidase domain 12
chr10	127936020	127936318	299	*	MACS_peak_1296	77.72	Intron (uc001ljk.2/8038, intron 3 of 22)	10	127702902	128077127	374226	2	8038	uc001ljk.2	140809	ENSG00000148848	ADAM12	ADAM metallopeptidase domain 12
chr10	128351692	128353042	1351	*	MACS_peak_1297	184.86	Intron (uc010qum.2/118611, intron 1 of 9)	10	128113574	128359079	245506	2	118611	uc010qum.2	6037	ENSG00000154493	C10orf90	chromosome 10 open reading frame 90
chr10	128358778	128359432	655	*	MACS_peak_1298	101.14	Promoter (<=1kb)	10	128113574	128359079	245506	2	118611	uc010qum.2	0	ENSG00000154493	C10orf90	chromosome 10 open reading frame 90
chr10	131662582	131663224	643	*	MACS_peak_1300	60.81	Intron (uc001lki.2/253738, intron 10 of 15)	10	131641563	131641638	76	2	100422873	uc021qaw.1	-20944	ENSG00000266676	MIR4297	microRNA 4297
chr10	131686086	131686926	841	*	MACS_peak_1301	98.37	Intron (uc001lki.2/253738, intron 6 of 15)	10	131641563	131641638	76	2	100422873	uc021qaw.1	-44448	ENSG00000266676	MIR4297	microRNA 4297
chr10	131909126	131909460	335	*	MACS_peak_1302	86.71	Promoter (<=1kb)	10	131862162	131909081	46920	2	387723	uc010qus.2	-45	NA	C10orf143	chromosome 10 open reading frame 143
chr11	191703	192240	538	*	MACS_peak_1313	73.07	Promoter (<=1kb)	11	193080	194573	1494	1	147199	uc001loa.1	-840	ENSG00000188076	SCGB1C1	secretoglobin family 1C member 1
chr11	305828	306477	650	*	MACS_peak_1315	55.54	Promoter (1-2kb)	11	308107	309410	1304	1	10581	uc001lox.4	-1630	ENSG00000185201	IFITM2	interferon induced transmembrane protein 2
chr11	373724	374488	765	*	MACS_peak_1316	68.51	Exon (uc001lpb.3/338707, exon 8 of 20)	11	369795	382117	12323	1	338707	uc001lpb.3	3929	ENSG00000182272	B4GALNT4	beta-1,4-N-acetyl-galactosaminyltransferase 4
chr11	447818	448570	753	*	MACS_peak_1317	53.24	Promoter (1-2kb)	11	450280	479445	29166	1	81490	uc009ybv.1	-1710	ENSG00000174915	PTDSS2	phosphatidylserine synthase 2
chr11	469601	470171	571	*	MACS_peak_1318	89.48	Intron (uc009ybv.1/81490, intron 2 of 3)	11	450280	491387	41108	1	81490	uc001lpj.3	19321	ENSG00000174915	PTDSS2	phosphatidylserine synthase 2
chr11	536841	537465	625	*	MACS_peak_1320	51.73	Promoter (<=1kb)	11	537522	554916	17395	1	115399	uc010qvz.2	-57	ENSG00000161328	LRRC56	leucine rich repeat containing 56
chr11	576219	576444	226	*	MACS_peak_1321	77.72	Promoter (<=1kb)	11	576483	612222	35740	1	57661	uc001lqe.3	-39	ENSG00000070047	PHRF1	PHD and ring finger domains 1
chr11	628448	628925	478	*	MACS_peak_1322	58.56	Promoter (1-2kb)	11	626313	627173	861	2	6343	uc001lqo.1	-1275	ENSG00000070031	SCT	secretin
chr11	710909	711396	488	*	MACS_peak_1323	114.85	Promoter (1-2kb)	11	709879	727727	17849	1	64787	uc001lqv.3	1030	ENSG00000177106	EPS8L2	EPS8 like 2
chr11	844637	845120	484	*	MACS_peak_1324	79.85	Promoter (<=1kb)	11	844446	867116	22671	1	7106	uc001lsj.1	191	ENSG00000214063	TSPAN4	tetraspanin 4
chr11	976742	976987	246	*	MACS_peak_1325	160.81	Intron (uc009yco.2/161, intron 4 of 15)	11	972062	982781	10720	1	161	uc001lsu.1	4680	ENSG00000183020	AP2A2	adaptor related protein complex 2 alpha 2 subunit
chr11	1292380	1292680	301	*	MACS_peak_1326	83	Downstream (2-3kb)	11	1295598	1323973	28376	2	54472	uc001ltd.3	31293	ENSG00000078902	TOLLIP	toll interacting protein
chr11	1848405	1848950	546	*	MACS_peak_1327	76.04	Promoter (<=1kb)	11	1848709	1857514	8806	1	90019	uc010qxb.1	0	ENSG00000149043	SYT8	synaptotagmin 8
chr11	1974905	1975459	555	*	MACS_peak_1328	51.7	Intron (uc001lux.3/6150, intron 4 of 4)	11	1968502	1977839	9338	1	6150	uc001lux.3	6403	ENSG00000214026	MRPL23	mitochondrial ribosomal protein L23
chr11	1975542	1975815	274	*	MACS_peak_1329	60.08	Intron (uc001lux.3/6150, intron 4 of 4)	11	1968502	1977839	9338	1	6150	uc001lux.3	7040	ENSG00000214026	MRPL23	mitochondrial ribosomal protein L23
chr11	2750066	2750548	483	*	MACS_peak_1330	68.71	Intron (uc001lwn.3/3784, intron 11 of 15)	11	2629558	2721228	91671	2	10984	uc001lwp.3	-28838	ENSG00000269821	KCNQ1OT1	KCNQ1 opposite strand/antisense transcript 1 (non-protein coding)
chr11	2753483	2754392	910	*	MACS_peak_1331	102.4	Intron (uc001lwn.3/3784, intron 11 of 15)	11	2629558	2721228	91671	2	10984	uc001lwp.3	-32255	ENSG00000269821	KCNQ1OT1	KCNQ1 opposite strand/antisense transcript 1 (non-protein coding)
chr11	2919824	2920341	518	*	MACS_peak_1332	131.12	Promoter (<=1kb)	11	2920951	2946476	25526	1	5002	uc001lwx.3	-610	ENSG00000110628	SLC22A18	solute carrier family 22 member 18
chr11	3021249	3022509	1261	*	MACS_peak_1333	106.67	3' UTR	11	3022152	3028964	6813	2	833	uc009ydu.3	6455	ENSG00000110619	CARS	cysteinyl-tRNA synthetase
chr11	3071041	3071474	434	*	MACS_peak_1334	86.89	Intron (uc001lxe.3/833, intron 1 of 22)	11	3022152	3078681	56530	2	833	uc001lxe.3	7207	ENSG00000110619	CARS	cysteinyl-tRNA synthetase
chr11	3116835	3117605	771	*	MACS_peak_1335	195.75	Promoter (<=1kb)	11	3108346	3116109	7764	2	114879	uc001lxj.2	-726	ENSG00000021762	OSBPL5	oxysterol binding protein like 5
chr11	3400200	3400594	395	*	MACS_peak_1336	75.35	Promoter (<=1kb)	11	3379157	3400452	21296	2	7748	uc001lxs.3	0	ENSG00000005801	ZNF195	zinc finger protein 195
chr11	3648598	3648876	279	*	MACS_peak_1337	82.77	Promoter (<=1kb)	11	3647690	3658789	11100	1	7221	uc001lya.2	908	ENSG00000182048	TRPC2	transient receptor potential cation channel subfamily C member 2, pseudogene
chr11	3705111	3705845	735	*	MACS_peak_1338	56.58	Intron (uc001lyg.3/4928, intron 9 of 12)	11	3686817	3692614	5798	2	57053	uc010qxu.2	-12497	ENSG00000129749	CHRNA10	cholinergic receptor nicotinic alpha 10 subunit
chr11	3819118	3819409	292	*	MACS_peak_1339	63.51	Promoter (<=1kb)	11	3819189	3847601	28413	1	27315	uc010qya.3	0	ENSG00000148985	PGAP2	post-GPI attachment to proteins 2
chr11	3985342	3986037	696	*	MACS_peak_1340	61.32	Intron (uc001lyv.2/6786, intron 1 of 11)	11	4079979	4114440	34462	1	6786	uc009yeg.2	-93942	ENSG00000167323	STIM1	stromal interaction molecule 1
chr11	4066179	4066987	809	*	MACS_peak_1341	52.7	Intron (uc001lyv.2/6786, intron 3 of 11)	11	4079979	4114440	34462	1	6786	uc009yeg.2	-12992	ENSG00000167323	STIM1	stromal interaction molecule 1
chr11	5279786	5280295	510	*	MACS_peak_1342	69.05	Intron (uc001mak.1/3048, intron 5 of 6)	11	5274421	5276395	1975	2	3048	uc001maj.1	-3391	ENSG00000196565	HBG2	hemoglobin subunit gamma 2
chr11	5555414	5555812	399	*	MACS_peak_1343	58.73	Intron (uc001mak.1/3048, intron 4 of 6)	11	5565791	5566753	963	2	390067	uc010qzh.2	10941	ENSG00000181616	OR52H1	olfactory receptor family 52 subfamily H member 1
chr11	5621612	5622119	508	*	MACS_peak_1344	52.68	Intron (uc001mbc.2/117854, intron 1 of 7)	11	5617865	5665625	47761	1	445372	uc001mbf.3	3747	ENSG00000258588	TRIM6-TRIM34	TRIM6-TRIM34 readthrough
chr11	6341103	6341834	732	*	MACS_peak_1345	51.22	Promoter (<=1kb)	11	6340176	6341740	1565	2	112464	uc001mcu.1	0	ENSG00000170955	CAVIN3	caveolae associated protein 3
chr11	6411053	6412064	1012	*	MACS_peak_1346	78.05	Promoter (<=1kb)	11	6411644	6416008	4365	1	6609	uc001mcv.2	0	ENSG00000166311	SMPD1	sphingomyelin phosphodiesterase 1
chr11	6494731	6495059	329	*	MACS_peak_1347	75.35	Promoter (<=1kb)	11	6470536	6494986	24451	2	10612	uc010rak.1	0	ENSG00000110171	TRIM3	tripartite motif containing 3
chr11	6640451	6640926	476	*	MACS_peak_1348	182.39	Promoter (<=1kb)	11	6633997	6640585	6589	2	1200	uc001mek.1	0	ENSG00000166340	TPP1	tripeptidyl peptidase 1
chr11	6756630	6757221	592	*	MACS_peak_1349	71.73	Intron (uc010ras.2/uc010ras.2, intron 1 of 1)	11	6734381	6743110	8730	2	387751	uc001meo.4	-13520	ENSG00000254838	GVINP1	GTPase, very large interferon inducible pseudogene 1
chr11	7509898	7510284	387	*	MACS_peak_1352	72.73	Intron (uc001mfi.3/283298, intron 2 of 2)	11	7506767	7532606	25840	1	283298	uc010rba.2	3131	ENSG00000183801	OLFML1	olfactomedin like 1
chr11	7532662	7533174	513	*	MACS_peak_1353	78.96	Promoter (1-2kb)	11	7534996	7674996	140001	1	8495	uc001mfj.5	-1822	ENSG00000166387	PPFIBP2	PPFIA binding protein 2
chr11	7600539	7601029	491	*	MACS_peak_1354	91.23	Promoter (2-3kb)	11	7598273	7663657	65385	1	8495	uc010rbd.1	2266	ENSG00000166387	PPFIBP2	PPFIA binding protein 2
chr11	7614517	7615010	494	*	MACS_peak_1355	137.24	Intron (uc001mfj.5/8495, intron 4 of 23)	11	7618417	7674996	56580	1	8495	uc010rbe.3	-3407	ENSG00000166387	PPFIBP2	PPFIA binding protein 2
chr11	7621382	7622437	1056	*	MACS_peak_1356	110.81	Promoter (2-3kb)	11	7618417	7674996	56580	1	8495	uc010rbe.3	2965	ENSG00000166387	PPFIBP2	PPFIA binding protein 2
chr11	7672784	7673507	724	*	MACS_peak_1357	82.86	Exon (uc001mfj.5/8495, exon 23 of 24)	11	7689715	7694122	4408	2	51700	uc009yfl.1	20615	ENSG00000166394	CYB5R2	cytochrome b5 reductase 2
chr11	7689917	7690448	532	*	MACS_peak_1358	73.14	3' UTR	11	7689715	7694122	4408	2	51700	uc009yfl.1	3674	ENSG00000166394	CYB5R2	cytochrome b5 reductase 2
chr11	8836358	8836750	393	*	MACS_peak_1360	52.87	Intron (uc001mgv.3/6764, intron 3 of 22)	11	8714899	8832882	117984	2	6764	uc001mgu.3	-3476	ENSG00000166444	ST5	suppression of tumorigenicity 5
chr11	8892757	8893124	368	*	MACS_peak_1361	61.91	Promoter (<=1kb)	11	8751497	8892917	141421	2	6764	uc001mgw.1	0	ENSG00000166444	ST5	suppression of tumorigenicity 5
chr11	9074904	9075544	641	*	MACS_peak_1362	91.76	Promoter (2-3kb)	11	9041047	9072257	31211	2	57758	uc021qdk.1	-2647	ENSG00000175356	SCUBE2	signal peptide, CUB domain and EGF like domain containing 2
chr11	9335964	9336735	772	*	MACS_peak_1363	55.61	Promoter (<=1kb)	11	9302201	9336315	34115	2	440026	uc001mhm.3	0	ENSG00000166471	TMEM41B	transmembrane protein 41B
chr11	9481811	9482968	1158	*	MACS_peak_1364	75.84	Promoter (<=1kb)	11	9481103	9482245	1143	2	644656	uc021qdn.1	0	ENSG00000268403	LOC644656	uncharacterized LOC644656
chr11	9780885	9781931	1047	*	MACS_peak_1365	97.39	Promoter (<=1kb)	11	9776317	9781080	4764	2	440028	uc001mhy.1	0	ENSG00000245522	LOC440028	uncharacterized LOC440028
chr11	9926690	9927999	1310	*	MACS_peak_1366	91.02	Intron (uc001mig.3/uc001mig.3, intron 1 of 2)	11	9978126	9990092	11967	2	81846	uc001mih.4	62093	ENSG00000133812	SBF2	SET binding factor 2
chr11	10324060	10324591	532	*	MACS_peak_1367	52.46	Promoter (2-3kb)	11	10326642	10328923	2282	1	133	uc001mil.1	-2051	ENSG00000148926	ADM	adrenomedullin
chr11	10387725	10388293	569	*	MACS_peak_1369	81.6	Intron (uc009yfv.1/uc009yfv.1, intron 1 of 2)	11	10326642	10328923	2282	1	133	uc001mil.1	61083	ENSG00000148926	ADM	adrenomedullin
chr11	10551319	10551709	391	*	MACS_peak_1370	52.87	Intron (uc001mis.1/50862, intron 3 of 5)	11	10533225	10562774	29550	2	50862	uc001mis.1	11065	ENSG00000110315	RNF141	ring finger protein 141
chr11	11979983	11980410	428	*	MACS_peak_1377	56.36	3' UTR	11	11971911	11980872	8962	1	55031	uc009ygi.3	8072	ENSG00000170242	USP47	ubiquitin specific peptidase 47
chr11	12000646	12001085	440	*	MACS_peak_1378	52.15	Intron (uc010rcf.2/27122, intron 2 of 5)	11	11971911	11980872	8962	1	55031	uc009ygi.3	28735	ENSG00000170242	USP47	ubiquitin specific peptidase 47
chr11	12122287	12122855	569	*	MACS_peak_1381	314.62	Intron (uc010rch.1/9645, intron 1 of 22)	11	12115543	12285329	169787	1	9645	uc010rch.1	6744	ENSG00000133816	MICAL2	microtubule associated monooxygenase, calponin and LIM domain containing 2
chr11	12185379	12186364	986	*	MACS_peak_1382	183.37	Promoter (1-2kb)	11	12183626	12285331	101706	1	9645	uc001mkc.3	1753	ENSG00000133816	MICAL2	microtubule associated monooxygenase, calponin and LIM domain containing 2
chr11	12246014	12246503	490	*	MACS_peak_1383	76.7	Promoter (1-2kb)	11	12244164	12285331	41168	1	9645	uc010rcj.2	1850	ENSG00000133816	MICAL2	microtubule associated monooxygenase, calponin and LIM domain containing 2
chr11	12482751	12483358	608	*	MACS_peak_1384	184.67	Intron (uc001mkh.3/55742, intron 1 of 3)	11	12419788	12535351	115564	1	55742	uc010rck.1	62963	ENSG00000197702	PARVA	parvin alpha
chr11	12505572	12506372	801	*	MACS_peak_1385	237.27	Intron (uc001mki.4/55742, intron 4 of 12)	11	12419788	12535351	115564	1	55742	uc010rck.1	85784	ENSG00000197702	PARVA	parvin alpha
chr11	12701959	12702516	558	*	MACS_peak_1388	53.96	Intron (uc021qdx.1/7003, intron 2 of 12)	11	12695969	12966284	270316	1	7003	uc021qdx.1	5990	ENSG00000187079	TEAD1	TEA domain transcription factor 1
chr11	12713662	12714726	1065	*	MACS_peak_1389	58.63	Intron (uc021qdx.1/7003, intron 2 of 12)	11	12695969	12966284	270316	1	7003	uc021qdx.1	17693	ENSG00000187079	TEAD1	TEA domain transcription factor 1
chr11	12753124	12754053	930	*	MACS_peak_1390	57.65	Intron (uc021qdx.1/7003, intron 2 of 12)	11	12695969	12966284	270316	1	7003	uc021qdx.1	57155	ENSG00000187079	TEAD1	TEA domain transcription factor 1
chr11	12836027	12836793	767	*	MACS_peak_1391	77.03	Intron (uc021qdx.1/7003, intron 3 of 12)	11	12849668	12887078	37411	1	7003	uc009ygk.3	-12875	ENSG00000187079	TEAD1	TEA domain transcription factor 1
chr11	12867278	12867924	647	*	MACS_peak_1392	50.55	Intron (uc021qdx.1/7003, intron 3 of 12)	11	12849668	12887078	37411	1	7003	uc009ygk.3	17610	ENSG00000187079	TEAD1	TEA domain transcription factor 1
chr11	13436738	13437222	485	*	MACS_peak_1394	145.09	Intron (uc010rcl.2/84280, intron 4 of 7)	11	13426876	13461755	34880	2	84280	uc010rcn.2	24533	ENSG00000148925	BTBD10	BTB domain containing 10
chr11	14541665	14542332	668	*	MACS_peak_1398	55.04	Promoter (<=1kb)	11	14515188	14541991	26804	2	5682	uc010rcp.1	0	ENSG00000129084	PSMA1	proteasome subunit alpha 1
chr11	15139055	15139981	927	*	MACS_peak_1399	111.72	Promoter (2-3kb)	11	15136484	15268756	132273	1	387755	uc001mlz.4	2571	ENSG00000188487	INSC	INSC, spindle orientation adaptor protein
chr11	16023187	16023946	760	*	MACS_peak_1409	55.31	Intron (uc001mmd.3/55553, intron 12 of 14)	11	15987995	16424413	436419	2	55553	uc001mmd.3	400467	ENSG00000110693	SOX6	SRY-box 6
chr11	16103034	16103731	698	*	MACS_peak_1410	73.52	Intron (uc001mmd.3/55553, intron 8 of 14)	11	15987995	16424413	436419	2	55553	uc001mmd.3	320682	ENSG00000110693	SOX6	SRY-box 6
chr11	16133275	16133648	374	*	MACS_peak_1411	59.33	Exon (uc001mmd.3/55553, exon 7 of 15)	11	15987995	16424413	436419	2	55553	uc001mmd.3	290765	ENSG00000110693	SOX6	SRY-box 6
chr11	16169054	16170442	1389	*	MACS_peak_1412	297.52	Intron (uc001mmd.3/55553, intron 6 of 14)	11	15987995	16424413	436419	2	55553	uc001mmd.3	253971	ENSG00000110693	SOX6	SRY-box 6
chr11	16213214	16214186	973	*	MACS_peak_1413	98.47	Intron (uc001mmd.3/55553, intron 4 of 14)	11	15987995	16424413	436419	2	55553	uc001mmd.3	210227	ENSG00000110693	SOX6	SRY-box 6
chr11	16215278	16216321	1044	*	MACS_peak_1414	50.4	Intron (uc001mmd.3/55553, intron 4 of 14)	11	15987995	16424413	436419	2	55553	uc001mmd.3	208092	ENSG00000110693	SOX6	SRY-box 6
chr11	16833611	16834429	819	*	MACS_peak_1415	244.71	Intron (uc010rcu.1/144100, intron 13 of 26)	11	16809207	16838962	29756	2	144100	uc010rcv.2	4533	ENSG00000166689	PLEKHA7	pleckstrin homology domain containing A7
chr11	16883235	16883754	520	*	MACS_peak_1416	53.72	Intron (uc010rcu.1/144100, intron 4 of 26)	11	16809207	16848137	38931	2	144100	uc001mmn.3	-35098	ENSG00000166689	PLEKHA7	pleckstrin homology domain containing A7
chr11	17861367	17862098	732	*	MACS_peak_1418	84.8	Intron (uc001mnm.3/26297, intron 10 of 10)	11	17800719	17804602	3884	1	3746	uc001mnl.1	60648	ENSG00000129159	KCNC1	potassium voltage-gated channel subfamily C member 1
chr11	18138875	18139629	755	*	MACS_peak_1419	55.14	Promoter (1-2kb)	11	18134019	18137679	3661	2	6290	uc001mnt.3	-1196	ENSG00000166787	SAA3P	serum amyloid A3 pseudogene
chr11	18333450	18333946	497	*	MACS_peak_1420	54.81	5' UTR	11	18300217	18343721	43505	2	11234	uc001mod.1	9775	ENSG00000110756	HPS5	HPS5, biogenesis of lysosomal organelles complex 2 subunit 2
chr11	18343392	18344286	895	*	MACS_peak_1421	201.91	Promoter (<=1kb)	11	18300217	18343721	43505	2	11234	uc001mod.1	0	ENSG00000110756	HPS5	HPS5, biogenesis of lysosomal organelles complex 2 subunit 2
chr11	18502451	18502759	309	*	MACS_peak_1422	99.65	Intron (uc001mor.3/7251, intron 9 of 9)	11	18477374	18501147	23774	1	160287	uc001moq.2	25077	ENSG00000166800	LDHAL6A	lactate dehydrogenase A like 6A
chr11	18655868	18656459	592	*	MACS_peak_1423	66.16	Promoter (<=1kb)	11	18627948	18656020	28073	2	144108	uc001moy.3	0	ENSG00000179119	SPTY2D1	SPT2 chromatin protein domain containing 1
chr11	18771329	18771636	308	*	MACS_peak_1424	61.01	Intron (uc001mpb.4/84867, intron 3 of 14)	11	18725852	18747777	21926	2	283284	uc009yht.2	-23552	ENSG00000179057	IGSF22	immunoglobulin superfamily member 22
chr11	19496790	19497333	544	*	MACS_peak_1426	52.46	Intron (uc001mpp.3/89797, intron 1 of 37)	11	19524220	19528776	4557	2	100874012	uc031pzi.1	31443	ENSG00000255043	NAV2-AS5	NAV2 antisense RNA 5
chr11	19677715	19678302	588	*	MACS_peak_1427	75.15	Intron (uc001mpp.3/89797, intron 1 of 37)	11	19734881	20143147	408267	1	89797	uc001mpr.4	-56579	ENSG00000166833	NAV2	neuron navigator 2
chr11	19701610	19702014	405	*	MACS_peak_1428	59.05	Intron (uc001mpp.3/89797, intron 1 of 37)	11	19734881	20143147	408267	1	89797	uc001mpr.4	-32867	ENSG00000166833	NAV2	neuron navigator 2
chr11	19708385	19708806	422	*	MACS_peak_1429	52.62	Intron (uc001mpp.3/89797, intron 1 of 37)	11	19734881	20143147	408267	1	89797	uc001mpr.4	-26075	ENSG00000166833	NAV2	neuron navigator 2
chr11	19733502	19734306	805	*	MACS_peak_1430	57.35	Promoter (<=1kb)	11	19734881	20143147	408267	1	89797	uc001mpr.4	-575	ENSG00000166833	NAV2	neuron navigator 2
chr11	19741384	19741793	410	*	MACS_peak_1431	79.53	Intron (uc001mpp.3/89797, intron 1 of 37)	11	19732480	19736218	3739	2	100126784	uc010rdl.2	-5166	NA	LOC100126784	uncharacterized LOC100126784
chr11	19761641	19762664	1024	*	MACS_peak_1432	66.11	Intron (uc001mpp.3/89797, intron 1 of 37)	11	19781550	19781629	80	2	100616426	uc021qex.1	18965	ENSG00000264309	MIR4694	microRNA 4694
chr11	19866150	19866581	432	*	MACS_peak_1433	56.69	Intron (uc001mpp.3/89797, intron 3 of 37)	11	19781550	19781629	80	2	100616426	uc021qex.1	-84521	ENSG00000264309	MIR4694	microRNA 4694
chr11	20133650	20134635	986	*	MACS_peak_1434	99.36	Intron (uc001mpp.3/89797, intron 36 of 37)	11	20125757	20143147	17391	1	89797	uc001mpv.3	7893	ENSG00000166833	NAV2	neuron navigator 2
chr11	20408815	20409583	769	*	MACS_peak_1435	79.82	Promoter (<=1kb)	11	20409076	20530879	121804	1	10196	uc001mqb.3	0	ENSG00000185238	PRMT3	protein arginine methyltransferase 3
chr11	20791912	20792617	706	*	MACS_peak_1436	122.5	Intron (uc001mqe.3/4745, intron 2 of 19)	11	20691117	21597229	906113	1	4745	uc010rdp.2	100795	ENSG00000165973	NELL1	neural EGFL like 1
chr11	22814079	22814426	348	*	MACS_peak_1441	132	Intron (uc009yie.3/2620, intron 7 of 7)	11	22843598	22851382	7785	2	258010	uc001mqp.4	36956	ENSG00000198168	SVIP	small VCP interacting protein
chr11	24720138	24720471	334	*	MACS_peak_1444	63.51	Intron (uc001mqs.3/338645, intron 1 of 11)	11	24518516	25104186	585671	1	338645	uc009yig.3	201622	ENSG00000187398	LUZP2	leucine zipper protein 2
chr11	26621451	26621770	320	*	MACS_peak_1448	66.25	Intron (uc010rdr.2/63982, intron 18 of 27)	11	26580579	26593815	13237	2	143662	uc001mqy.3	-27636	ENSG00000169550	MUC15	mucin 15, cell surface associated
chr11	26677873	26678235	363	*	MACS_peak_1449	63.51	Exon (uc010rdr.2/63982, exon 27 of 28)	11	26688566	26743574	55009	2	159963	uc001mra.2	65339	ENSG00000148942	SLC5A12	solute carrier family 5 member 12
chr11	30443871	30444375	505	*	MACS_peak_1454	101.86	Intron (uc001msq.3/744, intron 4 of 6)	11	30344649	30359165	14517	1	120534	uc001mso.1	99222	ENSG00000152219	ARL14EP	ADP ribosylation factor like GTPase 14 effector protein
chr11	30446413	30446975	563	*	MACS_peak_1455	77.41	Intron (uc001msq.3/744, intron 4 of 6)	11	30344649	30359165	14517	1	120534	uc001mso.1	101764	ENSG00000152219	ARL14EP	ADP ribosylation factor like GTPase 14 effector protein
chr11	32773593	32773936	344	*	MACS_peak_1458	53.81	Intron (uc001mtv.4/493860, intron 2 of 17)	11	32701408	32816156	114749	2	493860	uc009yjt.3	42220	ENSG00000186714	CCDC73	coiled-coil domain containing 73
chr11	32848924	32849453	530	*	MACS_peak_1459	75.76	Promoter (2-3kb)	11	32851481	32879669	28189	1	79056	uc001mtx.3	-2028	ENSG00000135378	PRRG4	proline rich and Gla domain 4
chr11	32872633	32873207	575	*	MACS_peak_1460	80.98	Intron (uc001mtx.3/79056, intron 5 of 5)	11	32851481	32879669	28189	1	79056	uc001mtx.3	21152	ENSG00000135378	PRRG4	proline rich and Gla domain 4
chr11	33640486	33640849	364	*	MACS_peak_1463	66.25	Intron (uc021qfs.1/25758, intron 15 of 19)	11	33563877	33695646	131770	1	25758	uc021qfs.1	76609	ENSG00000110427	KIAA1549L	KIAA1549 like
chr11	33746116	33746780	665	*	MACS_peak_1464	94.8	Promoter (1-2kb)	11	33724556	33744498	19943	2	966	uc009yjz.3	-1618	ENSG00000085063	CD59	CD59 molecule (CD59 blood group)
chr11	34244524	34245004	481	*	MACS_peak_1465	99.01	Intron (uc001mvl.2/25841, intron 1 of 16)	11	34127111	34168458	41348	1	55226	uc010ren.2	117413	ENSG00000135372	NAT10	N-acetyltransferase 10
chr11	34287797	34288804	1008	*	MACS_peak_1466	112.83	Intron (uc001mvl.2/25841, intron 1 of 16)	11	34172534	34379555	207022	2	25841	uc001mvl.2	90751	ENSG00000166016	ABTB2	ankyrin repeat and BTB domain containing 2
chr11	34324031	34324405	375	*	MACS_peak_1467	61.01	Intron (uc001mvl.2/25841, intron 1 of 16)	11	34172534	34379555	207022	2	25841	uc001mvl.2	55150	ENSG00000166016	ABTB2	ankyrin repeat and BTB domain containing 2
chr11	34338279	34338557	279	*	MACS_peak_1468	60.08	Intron (uc001mvl.2/25841, intron 1 of 16)	11	34172534	34379555	207022	2	25841	uc001mvl.2	40998	ENSG00000166016	ABTB2	ankyrin repeat and BTB domain containing 2
chr11	34352973	34353266	294	*	MACS_peak_1469	109.09	Intron (uc001mvl.2/25841, intron 1 of 16)	11	34172534	34379555	207022	2	25841	uc001mvl.2	26289	ENSG00000166016	ABTB2	ankyrin repeat and BTB domain containing 2
chr11	34380408	34381078	671	*	MACS_peak_1470	79.7	Promoter (<=1kb)	11	34172534	34379555	207022	2	25841	uc001mvl.2	-853	ENSG00000166016	ABTB2	ankyrin repeat and BTB domain containing 2
chr11	34937723	34938252	530	*	MACS_peak_1476	53.19	Promoter (<=1kb)	11	34896714	34937939	41226	2	51074	uc010reo.1	0	ENSG00000149089	APIP	APAF1 interacting protein
chr11	35188044	35188715	672	*	MACS_peak_1479	411.43	Intron (uc021qfw.1/960, intron 1 of 8)	11	35211382	35236461	25080	1	960	uc010res.2	-22667	ENSG00000026508	CD44	CD44 molecule (Indian blood group)
chr11	35818301	35818726	426	*	MACS_peak_1480	51.25	Intron (uc001mwi.2/54765, intron 4 of 4)	11	35684353	35830930	146578	1	54765	uc001mwi.2	133948	ENSG00000166326	TRIM44	tripartite motif containing 44
chr11	36013194	36013704	511	*	MACS_peak_1482	99.47	Intron (uc001mwk.1/143458, intron 1 of 5)	11	36031648	36031754	107	1	100616311	uc021qga.1	-17944	ENSG00000263389	MIR3973	microRNA 3973
chr11	36027981	36028512	532	*	MACS_peak_1483	69.11	Intron (uc001mwk.1/143458, intron 1 of 5)	11	36031648	36031754	107	1	100616311	uc021qga.1	-3136	ENSG00000263389	MIR3973	microRNA 3973
chr11	36034041	36034463	423	*	MACS_peak_1484	59.56	Promoter (2-3kb)	11	36031648	36031754	107	1	100616311	uc021qga.1	2393	ENSG00000263389	MIR3973	microRNA 3973
chr11	36171088	36171808	721	*	MACS_peak_1485	259.46	Intron (uc001mwk.1/143458, intron 4 of 5)	11	36119877	36252841	132965	1	143458	uc010rfa.1	51211	ENSG00000179241	LDLRAD3	low density lipoprotein receptor class A domain containing 3
chr11	36310780	36311349	570	*	MACS_peak_1487	97.8	Promoter (<=1kb)	11	36293842	36310999	17158	2	29099	uc001mwn.4	0	ENSG00000110442	COMMD9	COMM domain containing 9
chr11	36453437	36453714	278	*	MACS_peak_1488	68.19	Exon (uc001mwo.4/79899, exon 5 of 9)	11	36422547	36486754	64208	1	79899	uc010rfc.2	30890	ENSG00000135362	PRR5L	proline rich 5 like
chr11	40350784	40351184	401	*	MACS_peak_1492	61.01	Intron (uc031pzt.1/57689, intron 3 of 6)	11	40135751	40314680	178930	2	57689	uc031pzs.1	-36104	ENSG00000148948	LRRC4C	leucine rich repeat containing 4C
chr11	40422812	40423077	266	*	MACS_peak_1493	76.11	Intron (uc031pzt.1/57689, intron 3 of 6)	11	40135751	40314680	178930	2	57689	uc031pzs.1	-108132	ENSG00000148948	LRRC4C	leucine rich repeat containing 4C
chr11	40898826	40899171	346	*	MACS_peak_1494	92.79	Intron (uc031pzt.1/57689, intron 2 of 6)	11	40135751	41481186	1345436	2	57689	uc031pzt.1	582015	ENSG00000148948	LRRC4C	leucine rich repeat containing 4C
chr11	41341754	41342044	291	*	MACS_peak_1495	66.25	Intron (uc031pzt.1/57689, intron 1 of 6)	11	40135751	41481186	1345436	2	57689	uc031pzt.1	139142	ENSG00000148948	LRRC4C	leucine rich repeat containing 4C
chr11	43777914	43778768	855	*	MACS_peak_1499	50.85	Intron (uc001mxq.4/51144, intron 3 of 10)	11	43702143	43878169	176027	1	51144	uc001mxq.4	75771	ENSG00000149084	HSD17B12	hydroxysteroid 17-beta dehydrogenase 12
chr11	43852382	43852853	472	*	MACS_peak_1500	71.94	Exon (uc001mxq.4/51144, exon 7 of 11)	11	43902357	43941825	39469	1	221120	uc001mxs.2	-49504	ENSG00000166199	ALKBH3	alkB homolog 3, alpha-ketoglutaratedependent dioxygenase
chr11	43941712	43942273	562	*	MACS_peak_1501	79.11	Promoter (<=1kb)	11	43930839	43942494	11656	2	100507300	uc001mxu.2	221	ENSG00000244926	ALKBH3-AS1	ALKBH3 antisense RNA 1
chr11	44200386	44200842	457	*	MACS_peak_1504	53.25	Intron (uc010rfo.2/2132, intron 8 of 13)	11	44117747	44266980	149234	1	2132	uc001mya.3	82639	ENSG00000151348	EXT2	exostosin glycosyltransferase 2
chr11	44940687	44941010	324	*	MACS_peak_1507	61.01	Exon (uc001mye.4/90139, exon 6 of 9)	11	44927958	44952884	24927	1	90139	uc001myg.3	12729	ENSG00000157570	TSPAN18	tetraspanin 18
chr11	45119325	45119871	547	*	MACS_peak_1508	76.06	Intron (uc031pzz.1/56981, intron 2 of 7)	11	45115564	45246639	131076	1	56981	uc031pzz.1	3761	ENSG00000019485	PRDM11	PR/SET domain 11
chr11	45255166	45255443	278	*	MACS_peak_1509	63.86	3' UTR	11	45261853	45307884	46032	2	57586	uc001myq.2	52441	ENSG00000019505	SYT13	synaptotagmin 13
chr11	46385124	46385440	317	*	MACS_peak_1513	63.86	Promoter (1-2kb)	11	46383145	46402104	18960	1	8525	uc001ncn.1	1979	ENSG00000149091	DGKZ	diacylglycerol kinase zeta
chr11	46969975	46970406	432	*	MACS_peak_1515	57.54	Intron (uc001ndp.4/79096, intron 1 of 8)	11	46958240	47185931	227692	1	79096	uc001nds.4	11735	ENSG00000149179	C11orf49	chromosome 11 open reading frame 49
chr11	47176732	47177450	719	*	MACS_peak_1516	73.88	Exon (uc001ndp.4/79096, exon 5 of 9)	11	47185849	47195391	9543	2	84364	uc010rha.2	17941	ENSG00000149182	ARFGAP2	ADP ribosylation factor GTPase activating protein 2
chr11	47236153	47236597	445	*	MACS_peak_1517	53.52	Promoter (<=1kb)	11	47236493	47260769	24277	1	1643	uc001neb.2	0	ENSG00000134574	DDB2	damage specific DNA binding protein 2
chr11	47290699	47291722	1024	*	MACS_peak_1518	68.17	Promoter (<=1kb)	11	47290927	47351582	60656	1	8567	uc001neq.2	0	ENSG00000110514	MADD	MAP kinase activating death domain
chr11	47447680	47448261	582	*	MACS_peak_1519	88.57	Promoter (<=1kb)	11	47440320	47448024	7705	2	5702	uc001nfh.2	0	ENSG00000165916	PSMC3	proteasome 26S subunit, ATPase 3
chr11	47608804	47609482	679	*	MACS_peak_1520	86.83	Promoter (<=1kb)	11	47608230	47610746	2517	1	399888	uc001ngb.2	574	ENSG00000196666	FAM180B	family with sequence similarity 180 member B
chr11	47813168	47813566	399	*	MACS_peak_1521	53.81	Exon (uc001ngm.3/23279, exon 29 of 36)	11	47745580	47788993	43414	2	23360	uc001ngl.2	-24175	ENSG00000109920	FNBP4	formin binding protein 4
chr11	48063592	48064102	511	*	MACS_peak_1523	75.13	Intron (uc001ngo.4/5795, intron 1 of 8)	11	48002110	48192394	190285	1	5795	uc001ngp.4	61482	ENSG00000149177	PTPRJ	protein tyrosine phosphatase, receptor type J
chr11	48069214	48069495	282	*	MACS_peak_1524	63.86	Intron (uc001ngo.4/5795, intron 1 of 8)	11	48002110	48192394	190285	1	5795	uc001ngp.4	67104	ENSG00000149177	PTPRJ	protein tyrosine phosphatase, receptor type J
chr11	48116479	48116959	481	*	MACS_peak_1525	60.22	Intron (uc001ngo.4/5795, intron 1 of 8)	11	48157243	48161328	4086	1	5795	uc010rhr.1	-40284	ENSG00000149177	PTPRJ	protein tyrosine phosphatase, receptor type J
chr11	48130892	48131754	863	*	MACS_peak_1526	78.52	Exon (uc001ngo.4/5795, exon 2 of 9)	11	48157243	48161328	4086	1	5795	uc010rhr.1	-25489	ENSG00000149177	PTPRJ	protein tyrosine phosphatase, receptor type J
chr11	56171921	56172412	492	*	MACS_peak_1532	70.74	Intron (uc001nit.2/504189, intron 1 of 1)	11	56184734	56185708	975	2	219479	uc010rji.2	13296	ENSG00000279961	OR5R1	olfactory receptor family 5 subfamily R member 1 (gene/pseudogene)
chr11	56270619	56270960	342	*	MACS_peak_1533	82.77	Intron (uc001nit.2/504189, intron 1 of 1)	11	56257911	56258846	936	2	219484	uc001nix.1	-11773	ENSG00000181371	OR5M8	olfactory receptor family 5 subfamily M member 8
chr11	56468093	56468989	897	*	MACS_peak_1534	152.87	Promoter (<=1kb)	11	56467864	56468781	918	1	504191	uc010rjn.2	229	ENSG00000262191	OR9G9	olfactory receptor family 9 subfamily G member 9
chr11	57106928	57107463	536	*	MACS_peak_1536	52.87	Promoter (1-2kb)	11	57105841	57137549	31709	1	5024	uc001nju.3	1087	ENSG00000109991	P2RX3	purinergic receptor P2X 3
chr11	57192261	57193111	851	*	MACS_peak_1537	67.48	Promoter (<=1kb)	11	57154834	57191532	36699	2	5553	uc001nke.3	-729	ENSG00000186652	PRG2	proteoglycan 2, pro eosinophil major basic protein
chr11	57434517	57435162	646	*	MACS_peak_1538	50.87	Promoter (<=1kb)	11	57435474	57468659	33186	1	25921	uc001nkx.1	-312	ENSG00000156599	ZDHHC5	zinc finger DHHC-type containing 5
chr11	57508674	57509042	369	*	MACS_peak_1539	65.95	Promoter (<=1kb)	11	57508722	57510883	2162	1	280636	uc021qjj.1	0	ENSG00000211450	SELENOH	selenoprotein H
chr11	57509376	57509732	357	*	MACS_peak_1540	65.95	Promoter (<=1kb)	11	57508722	57510883	2162	1	280636	uc021qjj.1	654	ENSG00000211450	SELENOH	selenoprotein H
chr11	57545613	57546328	716	*	MACS_peak_1541	88.23	Intron (uc001nlf.2/100528016, intron 2 of 20)	11	57529234	57586652	57419	1	1500	uc009ymn.3	16379	ENSG00000198561	CTNND1	catenin delta 1
chr11	58345068	58345795	728	*	MACS_peak_1543	51.51	Promoter (<=1kb)	11	58294344	58345639	51296	2	9404	uc010rkj.2	0	ENSG00000110031	LPXN	leupaxin
chr11	58346688	58347633	946	*	MACS_peak_1544	69.51	Promoter (<=1kb)	11	58346587	58389023	42437	1	80829	uc001nmy.4	101	ENSG00000186660	ZFP91	ZFP91 zinc finger protein
chr11	59317708	59318298	591	*	MACS_peak_1550	54.33	Exon (uc021qjo.1/uc021qjo.1, exon 1 of 1)	11	59282386	59283330	945	1	390199	uc010rkv.2	35322	ENSG00000172742	OR4D9	olfactory receptor family 4 subfamily D member 9
chr11	59333396	59334147	752	*	MACS_peak_1551	63.12	Exon (uc021qjx.1/uc021qjx.1, exon 1 of 1)	11	59362550	59362631	82	2	100422880	uc021qjy.1	28484	ENSG00000264559	MIR3162	microRNA 3162
chr11	59436515	59437204	690	*	MACS_peak_1552	276.23	Promoter (<=1kb)	11	59410353	59436511	26159	2	219988	uc009yms.1	-4	ENSG00000166889	PATL1	PAT1 homolog 1, processing body mRNA decay factor
chr11	59523180	59524026	847	*	MACS_peak_1554	89.7	Promoter (<=1kb)	11	59522532	59573355	50824	1	6809	uc010rky.2	648	ENSG00000166900	STX3	syntaxin 3
chr11	59534542	59535197	656	*	MACS_peak_1555	99.43	Intron (uc001nog.3/6809, intron 1 of 10)	11	59522532	59573355	50824	1	6809	uc010rky.2	12010	ENSG00000166900	STX3	syntaxin 3
chr11	59938067	59938531	465	*	MACS_peak_1558	71.32	Downstream (<1kb)	11	59939080	59950804	11725	2	64231	uc001noq.3	12273	ENSG00000110077	MS4A6A	membrane spanning 4-domains A6A
chr11	60156344	60157398	1055	*	MACS_peak_1560	156.08	3' UTR	11	60163487	60185228	21742	1	84689	uc001npj.3	-6089	ENSG00000166928	MS4A14	membrane spanning 4-domains A14
chr11	60657428	60657953	526	*	MACS_peak_1561	52.69	Downstream (<1kb)	11	60658020	60674061	16042	2	27339	uc001nqf.3	16108	ENSG00000110107	PRPF19	pre-mRNA processing factor 19
chr11	60928610	60929205	596	*	MACS_peak_1562	61.35	Promoter (<=1kb)	11	60897728	60928916	31189	2	55048	uc001nqv.1	0	ENSG00000167987	VPS37C	VPS37C, ESCRT-I subunit
chr11	61116048	61116726	679	*	MACS_peak_1563	66	3' UTR	11	61069729	61110047	40319	2	1642	uc010rlf.1	-6001	ENSG00000167986	DDB1	damage specific DNA binding protein 1
chr11	61273164	61273776	613	*	MACS_peak_1564	71.14	Promoter (2-3kb)	11	61276068	61276129	62	1	100616470	uc021qkg.1	-2292	ENSG00000266006	MIR4488	microRNA 4488
chr11	61500791	61501211	421	*	MACS_peak_1565	150.05	Intron (uc001nsa.3/747, intron 9 of 19)	11	61520121	61555989	35869	1	745	uc001nsc.1	-18910	ENSG00000124920	MYRF	myelin regulatory factor
chr11	61559894	61560529	636	*	MACS_peak_1566	110.19	Promoter (<=1kb)	11	61560109	61564714	4606	1	2237	uc001nsg.3	0	ENSG00000168496	FEN1	flap structure-specific endonuclease 1
chr11	61664282	61665344	1063	*	MACS_peak_1567	138.98	3' UTR	11	61640998	61659006	18009	2	3995	uc001nsm.3	-5276	ENSG00000221968	FADS3	fatty acid desaturase 3
chr11	61893440	61893854	415	*	MACS_peak_1569	62.71	Promoter (1-2kb)	11	61891445	61920635	29191	1	3619	uc001nsx.1	1995	ENSG00000149503	INCENP	inner centromere protein
chr11	62206206	62206605	400	*	MACS_peak_1570	83	Intron (uc001ntk.2/79026, intron 5 of 5)	11	62186507	62190678	4172	1	7356	uc001ntj.3	19699	ENSG00000149021	SCGB1A1	secretoglobin family 1A member 1
chr11	62268856	62269297	442	*	MACS_peak_1571	90.09	Intron (uc001ntk.2/79026, intron 4 of 5)	11	62201014	62314332	113319	2	79026	uc001ntk.2	45035	ENSG00000124942	AHNAK	AHNAK nucleoprotein
chr11	62276056	62276589	534	*	MACS_peak_1572	191.8	Intron (uc001ntk.2/79026, intron 4 of 5)	11	62201014	62314332	113319	2	79026	uc001ntk.2	37743	ENSG00000124942	AHNAK	AHNAK nucleoprotein
chr11	62414041	62414288	248	*	MACS_peak_1573	106.76	Promoter (<=1kb)	11	62392298	62414198	21901	2	23193	uc001nua.4	0	ENSG00000089597	GANAB	glucosidase II alpha subunit
chr11	62438796	62439493	698	*	MACS_peak_1574	76.59	Promoter (<=1kb)	11	62430289	62439241	8953	2	79081	uc001nuf.3	0	ENSG00000162194	LBHD1	LBH domain containing 1
chr11	62446436	62446918	483	*	MACS_peak_1575	58.26	Promoter (<=1kb)	11	62443972	62446527	2556	2	51035	uc001nuj.3	0	ENSG00000162191	UBXN1	UBX domain protein 1
chr11	62456099	62456489	391	*	MACS_peak_1576	51.48	Promoter (<=1kb)	11	62453874	62457371	3498	2	221091	uc001nun.3	882	ENSG00000177363	LRRN4CL	LRRN4 C-terminal like
chr11	62538512	62539571	1060	*	MACS_peak_1577	78.06	Promoter (<=1kb)	11	62538775	62546260	7486	1	10629	uc010rmg.2	0	ENSG00000162227	TAF6L	TATA-box binding protein associated factor 6 like
chr11	62554900	62555478	579	*	MACS_peak_1578	50.72	Promoter (<=1kb)	11	62554874	62557872	2999	1	374395	uc001nvd.4	26	ENSG00000185475	TMEM179B	transmembrane protein 179B
chr11	62608189	62608996	808	*	MACS_peak_1579	138.86	Promoter (<=1kb)	11	62600383	62609281	8899	2	54663	uc009yoi.2	285	ENSG00000133316	WDR74	WD repeat domain 74
chr11	62643214	62643830	617	*	MACS_peak_1580	56.8	Intron (uc001nwc.3/6520, intron 2 of 11)	11	62648344	62656355	8012	1	6520	uc001nwg.3	-4514	ENSG00000168003	SLC3A2	solute carrier family 3 member 2
chr11	62648824	62649719	896	*	MACS_peak_1581	217.85	Promoter (<=1kb)	11	62648344	62656355	8012	1	6520	uc001nwg.3	480	ENSG00000168003	SLC3A2	solute carrier family 3 member 2
chr11	62689174	62689759	586	*	MACS_peak_1582	59.62	Promoter (<=1kb)	11	62676151	62689012	12862	2	1128	uc001nwi.3	-162	ENSG00000168539	CHRM1	cholinergic receptor muscarinic 1
chr11	63706279	63706714	436	*	MACS_peak_1583	58.7	Promoter (<=1kb)	11	63706442	63724446	18005	1	79829	uc009yoz.3	0	ENSG00000110583	NAA40	N(alpha)-acetyltransferase 40, NatD catalytic subunit
chr11	63753266	63753905	640	*	MACS_peak_1584	50.92	Promoter (<=1kb)	11	63753325	63765892	12568	1	55611	uc001nyf.1	0	ENSG00000167770	OTUB1	OTU deubiquitinase, ubiquitin aldehyde binding 1
chr11	63853594	63854700	1107	*	MACS_peak_1585	57.45	Intron (uc001nyh.3/28992, intron 3 of 10)	11	63871362	63886645	15284	1	23769	uc001nyi.1	-16662	ENSG00000126500	FLRT1	fibronectin leucine rich transmembrane protein 1
chr11	63964041	63964483	443	*	MACS_peak_1587	85.96	Intron (uc001nyk.1/10963, intron 5 of 13)	11	63974152	63991363	17212	1	83706	uc001nyl.2	-9669	ENSG00000149781	FERMT3	fermitin family member 3
chr11	64038757	64039296	540	*	MACS_peak_1588	163.29	Exon (uc001nzc.3/572, exon 2 of 3)	11	64051811	64056972	5162	1	56834	uc010rni.2	-12515	ENSG00000173264	GPR137	G protein-coupled receptor 137
chr11	64071791	64072457	667	*	MACS_peak_1589	63.33	Promoter (<=1kb)	11	64073044	64084210	11167	1	2101	uc001nzq.1	-587	ENSG00000173153	ESRRA	estrogen related receptor alpha
chr11	64338738	64339042	305	*	MACS_peak_1590	63.51	3' UTR	11	64329476	64334171	4696	1	55867	uc001oak.1	9262	ENSG00000168065	SLC22A11	solute carrier family 22 member 11
chr11	64646277	64646923	647	*	MACS_peak_1591	59.49	Promoter (<=1kb)	11	64620208	64646191	25984	2	10938	uc001obu.1	-86	ENSG00000110047	EHD1	EH domain containing 1
chr11	64685408	64685785	378	*	MACS_peak_1592	53.72	Promoter (<=1kb)	11	64681120	64684722	3603	2	23130	uc010rnt.1	-686	ENSG00000110046	ATG2A	autophagy related 2A
chr11	64863308	64863815	508	*	MACS_peak_1593	98.58	Promoter (<=1kb)	11	64863587	64879332	15746	1	738	uc001ocr.2	0	ENSG00000149823	VPS51	VPS51, GARP complex subunit
chr11	64870086	64870414	329	*	MACS_peak_1594	61.01	Intron (uc001ocr.2/738, intron 2 of 9)	11	64874985	64879332	4348	1	738	uc001ocs.2	-4571	ENSG00000149823	VPS51	VPS51, GARP complex subunit
chr11	65188554	65189376	823	*	MACS_peak_1596	159.16	Promoter (<=1kb)	11	65190269	65212028	21760	1	283131	uc010rog.2	-893	ENSG00000245532	NEAT1	nuclear paraspeckle assembly transcript 1 (non-protein coding)
chr11	65264886	65265485	600	*	MACS_peak_1599	69.97	Promoter (<=1kb)	11	65265233	65273939	8707	1	378938	uc010roh.3	0	ENSG00000251562	MALAT1	metastasis associated lung adenocarcinoma transcript 1 (non-protein coding)
chr11	65337210	65337976	767	*	MACS_peak_1600	70.88	Promoter (<=1kb)	11	65337943	65339239	1297	1	10534	uc001oek.3	0	ENSG00000173465	SSSCA1	Sjogren syndrome/scleroderma autoantigen 1
chr11	65478913	65479962	1050	*	MACS_peak_1601	189.89	Promoter (<=1kb)	11	65479473	65487077	7605	1	10524	uc001ofi.3	0	ENSG00000172977	KAT5	lysine acetyltransferase 5
chr11	65624372	65624800	429	*	MACS_peak_1603	57.03	Promoter (1-2kb)	11	65622285	65626101	3817	2	1072	uc001ofs.3	1301	ENSG00000172757	CFL1	cofilin 1
chr11	65683079	65683693	615	*	MACS_peak_1604	83.07	Promoter (2-3kb)	11	65684283	65686531	2249	2	83638	uc001ogi.3	2838	ENSG00000175573	C11orf68	chromosome 11 open reading frame 68
chr11	65836710	65837385	676	*	MACS_peak_1605	61.56	Promoter (<=1kb)	11	65837824	65986168	148345	1	55690	uc001ogz.1	-439	ENSG00000175115	PACS1	phosphofurin acidic cluster sorting protein 1
chr11	66129089	66129535	447	*	MACS_peak_1607	64.75	Downstream (<1kb)	11	66129992	66139117	9126	2	3177	uc009yrf.3	9582	ENSG00000174669	SLC29A2	solute carrier family 29 member 2
chr11	66247036	66247784	749	*	MACS_peak_1608	51.1	Promoter (<=1kb)	11	66247484	66277130	29647	1	10072	uc001oif.2	0	ENSG00000254986	DPP3	dipeptidyl peptidase 3
chr11	66445822	66446395	574	*	MACS_peak_1609	53.39	Promoter (<=1kb)	11	66432470	66445275	12806	2	83759	uc001ojb.3	-547	ENSG00000173914	RBM4B	RNA binding motif protein 4B
chr11	66726098	66726506	409	*	MACS_peak_1610	72.67	Promoter (<=1kb)	11	66615997	66725847	109851	2	5091	uc001ojp.1	-251	ENSG00000173599	PC	pyruvate carboxylase
chr11	67092914	67093118	205	*	MACS_peak_1612	135.91	Intron (uc010rpo.1/100130987, intron 2 of 3)	11	67085310	67159158	73849	1	100130987	uc010rpo.1	7604	NA	LOC100130987	uncharacterized LOC100130987
chr11	67158938	67159855	918	*	MACS_peak_1613	121.17	Promoter (<=1kb)	11	67159423	67165883	6461	1	5883	uc001okr.3	0	ENSG00000172613	RAD9A	RAD9 checkpoint clamp component A
chr11	67351989	67353073	1085	*	MACS_peak_1614	54.07	Promoter (<=1kb)	11	67351066	67354124	3059	1	2950	uc001omf.3	923	ENSG00000084207	GSTP1	glutathione S-transferase pi 1
chr11	67888850	67889511	662	*	MACS_peak_1615	51.52	Promoter (<=1kb)	11	67820326	67888858	68533	2	1119	uc001onj.3	0	ENSG00000110721	CHKA	choline kinase alpha
chr11	67889629	67889937	309	*	MACS_peak_1616	53.72	Promoter (<=1kb)	11	67820326	67888858	68533	2	1119	uc001onk.3	-771	ENSG00000110721	CHKA	choline kinase alpha
chr11	68033209	68034495	1287	*	MACS_peak_1618	122.05	Intron (uc001onr.4/53838, intron 2 of 3)	11	68028803	68039469	10667	2	53838	uc001onr.4	4974	ENSG00000171067	C11orf24	chromosome 11 open reading frame 24
chr11	68335140	68335512	373	*	MACS_peak_1619	55.18	Intron (uc001onu.3/55291, intron 10 of 22)	11	68343426	68382801	39376	1	55291	uc001onz.3	-7914	ENSG00000110075	PPP6R3	protein phosphatase 6 regulatory subunit 3
chr11	68815543	68816126	584	*	MACS_peak_1620	55.85	Promoter (<=1kb)	11	68816350	68846261	29912	1	219931	uc009ysk.1	-224	ENSG00000162341	TPCN2	two pore segment channel 2
chr11	68842903	68843278	376	*	MACS_peak_1621	60.08	Intron (uc009ysk.1/219931, intron 12 of 13)	11	68822630	68858072	35443	1	219931	uc021qmo.1	20273	ENSG00000162341	TPCN2	two pore segment channel 2
chr11	69064635	69065531	897	*	MACS_peak_1622	141.21	3' UTR	11	69061622	69156450	94829	1	26579	uc001oox.3	3013	ENSG00000172927	MYEOV	myeloma overexpressed
chr11	69957710	69958067	358	*	MACS_peak_1628	51.18	Exon (uc001opj.3/55107, exon 7 of 26)	11	69954459	70035652	81194	1	55107	uc010rqk.2	3251	ENSG00000131620	ANO1	anoctamin 1
chr11	70245815	70246239	425	*	MACS_peak_1629	80.24	Promoter (1-2kb)	11	70244612	70282690	38079	1	2017	uc001opw.4	1203	ENSG00000085733	CTTN	cortactin
chr11	70364254	70364665	412	*	MACS_peak_1630	58.72	Intron (uc009ysn.1/uc009ysn.1, intron 1 of 1)	11	70336271	70346698	10428	2	22941	uc010rqo.1	-17556	ENSG00000162105	SHANK2	SH3 and multiple ankyrin repeat domains 2
chr11	70650574	70650953	380	*	MACS_peak_1631	105.71	Intron (uc001oqc.3/22941, intron 10 of 21)	11	70708895	70711220	2326	1	220070	uc009yso.3	-57942	ENSG00000171671	SHANK2-AS3	SHANK2 antisense RNA 3
chr11	70851002	70851299	298	*	MACS_peak_1632	66.25	Intron (uc001oqc.3/22941, intron 2 of 21)	11	70313961	70935842	621882	2	22941	uc001oqc.3	84543	ENSG00000162105	SHANK2	SH3 and multiple ankyrin repeat domains 2
chr11	71143215	71143570	356	*	MACS_peak_1633	76.11	Downstream (1-2kb)	11	71116792	71134400	17609	2	399923	uc001oqj.2	-8815	ENSG00000172900	FLJ42102	uncharacterized LOC399923
chr11	71498126	71498690	565	*	MACS_peak_1634	62.88	Promoter (<=1kb)	11	71498557	71512280	13724	1	55199	uc001oqv.4	0	ENSG00000158483	FAM86C1	family with sequence similarity 86 member C1
chr11	71503903	71504251	349	*	MACS_peak_1635	72.73	Intron (uc001oqv.4/55199, intron 2 of 4)	11	71498557	71512280	13724	1	55199	uc010rqq.2	5346	ENSG00000158483	FAM86C1	family with sequence similarity 86 member C1
chr11	71814100	71814879	780	*	MACS_peak_1636	103.53	Promoter (<=1kb)	11	71808338	71814433	6096	2	55004	uc001ort.3	0	ENSG00000149357	LAMTOR1	late endosomal/lysosomal adaptor, MAPK and MTOR activator 1
chr11	72470601	72470951	351	*	MACS_peak_1638	56.41	Intron (uc001osv.3/116985, intron 1 of 33)	11	72396114	72463434	67321	2	116985	uc001osu.3	-7167	ENSG00000186635	ARAP1	ArfGAP with RhoGAP domain, ankyrin repeat and PH domain 1
chr11	72504489	72505134	646	*	MACS_peak_1639	50.87	Promoter (<=1kb)	11	72465774	72504702	38929	2	10809	uc001osz.4	0	ENSG00000214530	STARD10	StAR related lipid transfer domain containing 10
chr11	73125978	73126616	639	*	MACS_peak_1641	54.6	Intron (uc001oty.1/23201, intron 4 of 7)	11	73104289	73108519	4231	1	84957	uc001otx.3	21689	ENSG00000054967	RELT	RELT, TNF receptor
chr11	73221728	73222342	615	*	MACS_peak_1642	62.34	Intron (uc001oty.1/23201, intron 1 of 7)	11	73117028	73309228	192201	2	23201	uc001oty.1	86886	ENSG00000054965	FAM168A	family with sequence similarity 168 member A
chr11	73309300	73309646	347	*	MACS_peak_1643	56.41	Promoter (<=1kb)	11	73117028	73309228	192201	2	23201	uc009ytp.1	-72	ENSG00000054965	FAM168A	family with sequence similarity 168 member A
chr11	73362849	73364124	1276	*	MACS_peak_1644	83.12	Promoter (<=1kb)	11	73363485	73373864	10380	1	58473	uc031qco.1	0	ENSG00000021300	PLEKHB1	pleckstrin homology domain containing B1
chr11	73498867	73499448	582	*	MACS_peak_1645	99.55	Promoter (<=1kb)	11	73498917	73575656	76740	1	51642	uc001ouh.4	0	ENSG00000175581	MRPL48	mitochondrial ribosomal protein L48
chr11	73587561	73588166	606	*	MACS_peak_1646	55.03	Promoter (<=1kb)	11	73583713	73587890	4178	2	51287	uc001ouj.3	0	ENSG00000181924	COA4	cytochrome c oxidase assembly factor 4 homolog
chr11	74109563	74109989	427	*	MACS_peak_1647	52.99	Promoter (<=1kb)	11	74041361	74109502	68142	2	283209	uc001ovb.1	-61	ENSG00000165434	PGM2L1	phosphoglucomutase 2 like 1
chr11	74659850	74660524	675	*	MACS_peak_1648	117.86	Promoter (<=1kb)	11	74518784	74660232	141449	2	143570	uc001ovm.2	0	ENSG00000166435	XRRA1	X-ray radiation resistance associated 1
chr11	74682585	74682937	353	*	MACS_peak_1649	109.09	Intron (uc001ovu.2/9789, intron 4 of 4)	11	74699324	74718743	19420	1	10825	uc001ovv.3	-16387	ENSG00000162139	NEU3	neuraminidase 3
chr11	75024917	75025193	277	*	MACS_peak_1653	55.18	Intron (uc001owe.2/408, intron 1 of 15)	11	75046136	75046230	95	2	442900	uc010rrt.2	21037	ENSG00000199090	MIR326	microRNA 326
chr11	75238992	75239964	973	*	MACS_peak_1655	150.8	Promoter (2-3kb)	11	75196350	75236599	40250	2	81544	uc001owq.4	-2393	ENSG00000158555	GDPD5	glycerophosphodiester phosphodiesterase domain containing 5
chr11	75525684	75526185	502	*	MACS_peak_1656	81.91	Promoter (<=1kb)	11	75526212	75855282	329071	1	7405	uc001oxc.3	-27	ENSG00000198382	UVRAG	UV radiation resistance associated
chr11	75599468	75600056	589	*	MACS_peak_1657	69.01	Exon (uc001oxc.3/7405, exon 5 of 15)	11	75641904	75728024	86121	1	7405	uc009yuh.1	-41848	ENSG00000198382	UVRAG	UV radiation resistance associated
chr11	76499877	76500300	424	*	MACS_peak_1660	160.88	Intron (uc031qcw.1/25987, intron 1 of 1)	11	76494285	76509198	14914	1	25987	uc001oxt.3	5592	ENSG00000182704	TSKU	tsukushi, small leucine rich proteoglycan
chr11	76797575	76798119	545	*	MACS_peak_1661	63.91	Intron (uc001oxx.3/726, intron 2 of 12)	11	76813886	76814377	492	1	4975	uc010rsk.2	-15767	ENSG00000254550	OMP	olfactory marker protein
chr11	77531775	77532124	350	*	MACS_peak_1663	51.48	Promoter (<=1kb)	11	77377274	77531880	154607	2	51773	uc001oyn.3	0	ENSG00000048649	RSF1	remodeling and spacing factor 1
chr11	77584116	77584726	611	*	MACS_peak_1664	54.77	Intron (uc001oyp.3/28971, intron 3 of 3)	11	77532208	77611760	79553	1	28971	uc001oyr.1	51908	ENSG00000087884	AAMDC	adipogenesis associated Mth938 domain containing
chr11	77741567	77742129	563	*	MACS_peak_1665	102.36	Intron (uc021qnr.1/100532726, intron 3 of 3)	11	77726761	77734320	7560	2	65987	uc001oyw.4	-7247	ENSG00000151364	KCTD14	potassium channel tetramerization domain containing 14
chr11	77856667	77857406	740	*	MACS_peak_1666	137.96	Intron (uc031qcx.1/100289388, intron 2 of 3)	11	77850839	77885023	34185	1	100289388	uc031qcy.1	5828	ENSG00000246174	KCTD21-AS1	KCTD21 antisense RNA 1
chr11	78023918	78024715	798	*	MACS_peak_1667	117.64	Intron (uc001ozg.3/9846, intron 1 of 9)	11	77926336	78052926	126591	2	9846	uc001ozg.3	28211	ENSG00000033327	GAB2	GRB2 associated binding protein 2
chr11	78024980	78025371	392	*	MACS_peak_1668	81.61	Intron (uc001ozg.3/9846, intron 1 of 9)	11	77926336	78052926	126591	2	9846	uc001ozg.3	27555	ENSG00000033327	GAB2	GRB2 associated binding protein 2
chr11	78113806	78114346	541	*	MACS_peak_1669	56.43	Intron (uc001ozh.3/9846, intron 1 of 9)	11	77926336	78128868	202533	2	9846	uc001ozh.3	14522	ENSG00000033327	GAB2	GRB2 associated binding protein 2
chr11	78180933	78181441	509	*	MACS_peak_1670	81.45	Intron (uc001ozi.3/79731, intron 9 of 13)	11	77926336	78128868	202533	2	9846	uc001ozh.3	-52065	ENSG00000033327	GAB2	GRB2 associated binding protein 2
chr11	78384317	78384682	366	*	MACS_peak_1672	63.51	Promoter (2-3kb)	11	78364328	78387450	23123	2	26011	uc001ozk.4	2768	ENSG00000149256	TENM4	teneurin transmembrane protein 4
chr11	78792404	78793430	1027	*	MACS_peak_1673	112.55	Intron (uc001ozl.4/26011, intron 4 of 33)	11	78600830	78781054	180225	2	26011	uc021qnz.1	-11350	ENSG00000149256	TENM4	teneurin transmembrane protein 4
chr11	78830931	78831351	421	*	MACS_peak_1674	57.42	Intron (uc001ozl.4/26011, intron 4 of 33)	11	78600830	78781054	180225	2	26011	uc021qnz.1	-49877	ENSG00000149256	TENM4	teneurin transmembrane protein 4
chr11	82575388	82575749	362	*	MACS_peak_1678	61.01	Intron (uc001ozr.3/5547, intron 2 of 9)	11	82535409	82611557	76149	2	5547	uc001ozr.3	35808	ENSG00000137509	PRCP	prolylcarboxypeptidase
chr11	82868802	82869441	640	*	MACS_peak_1679	66.03	Promoter (<=1kb)	11	82868137	82896835	28699	1	51585	uc001ozx.4	665	ENSG00000165494	PCF11	PCF11 cleavage and polyadenylation factor subunit
chr11	82996945	82997638	694	*	MACS_peak_1680	84.51	Promoter (<=1kb)	11	82972502	82997019	24518	2	60492	uc001pac.3	0	ENSG00000137500	CCDC90B	coiled-coil domain containing 90B
chr11	83219927	83220281	355	*	MACS_peak_1681	69.3	Intron (uc010rsw.1/1740, intron 4 of 10)	11	83166056	83393468	227413	2	1740	uc010rsw.1	173187	ENSG00000150672	DLG2	discs large MAGUK scaffold protein 2
chr11	83518706	83519439	734	*	MACS_peak_1682	70.38	Intron (uc001pai.2/1740, intron 9 of 19)	11	83166056	83393468	227413	2	1740	uc010rsx.1	-125238	ENSG00000150672	DLG2	discs large MAGUK scaffold protein 2
chr11	83640853	83641312	460	*	MACS_peak_1683	59.65	Intron (uc001pai.2/1740, intron 7 of 19)	11	83166056	83393468	227413	2	1740	uc010rsx.1	-247385	ENSG00000150672	DLG2	discs large MAGUK scaffold protein 2
chr11	84120167	84120732	566	*	MACS_peak_1684	110.6	Intron (uc001paj.2/1740, intron 2 of 22)	11	83497484	84028382	530899	2	1740	uc001pam.2	-91785	ENSG00000150672	DLG2	discs large MAGUK scaffold protein 2
chr11	84137670	84137894	225	*	MACS_peak_1685	96.75	Intron (uc001paj.2/1740, intron 2 of 22)	11	83497484	84028382	530899	2	1740	uc001pam.2	-109288	ENSG00000150672	DLG2	discs large MAGUK scaffold protein 2
chr11	85194861	85195329	469	*	MACS_peak_1686	738.25	Intron (uc001pak.2/1740, intron 3 of 27)	11	83166056	85338314	2172259	2	1740	uc001pak.2	142985	ENSG00000150672	DLG2	discs large MAGUK scaffold protein 2
chr11	85430052	85430612	561	*	MACS_peak_1687	93.99	Promoter (<=1kb)	11	85405265	85430196	24932	2	54843	uc001pax.3	0	ENSG00000137501	SYTL2	synaptotagmin like 2
chr11	85780018	85780584	567	*	MACS_peak_1689	83.88	Promoter (<=1kb)	11	85668214	85780139	111926	2	8301	uc001pbl.3	0	ENSG00000073921	PICALM	phosphatidylinositol binding clathrin assembly protein
chr11	86667150	86667637	488	*	MACS_peak_1693	53.26	Promoter (<=1kb)	11	86666663	86711989	45327	1	100506368	uc001pcf.3	487	ENSG00000246523	LOC100506368	uncharacterized LOC100506368
chr11	86693571	86693970	400	*	MACS_peak_1694	53.81	Intron (uc001pcf.3/100506368, intron 2 of 2)	11	86666663	86711989	45327	1	100506368	uc001pcf.3	26908	ENSG00000246523	LOC100506368	uncharacterized LOC100506368
chr11	86866410	86866870	461	*	MACS_peak_1695	59.24	Intron (uc001pcg.2/65084, intron 4 of 4)	11	86748886	87039876	290991	1	65084	uc010rtt.2	117524	ENSG00000166575	TMEM135	transmembrane protein 135
chr11	86975115	86975419	305	*	MACS_peak_1696	82.77	Intron (uc001pch.3/65084, intron 6 of 14)	11	86748886	87039876	290991	1	65084	uc010rtt.2	226229	ENSG00000166575	TMEM135	transmembrane protein 135
chr11	87884946	87885993	1048	*	MACS_peak_1698	102.22	Intron (uc001pcj.2/23682, intron 1 of 2)	11	87846415	87908635	62221	2	23682	uc001pcj.2	22642	ENSG00000123892	RAB38	RAB38, member RAS oncogene family
chr11	88312772	88313180	409	*	MACS_peak_1700	53.39	Intron (uc001pcq.3/2915, intron 6 of 8)	11	88237744	88257222	19479	1	100873989	uc031qdb.1	75028	ENSG00000255082	GRM5-AS1	GRM5 antisense RNA 1
chr11	88909005	88909300	296	*	MACS_peak_1702	67.79	Promoter (1-2kb)	11	88911040	89028927	117888	1	7299	uc001pcs.3	-1740	ENSG00000077498	TYR	tyrosinase
chr11	92226888	92227222	335	*	MACS_peak_1704	80.99	Intron (uc001pdj.4/120114, intron 1 of 24)	11	92085262	92629635	544374	1	120114	uc001pdj.4	141626	ENSG00000165323	FAT3	FAT atypical cadherin 3
chr11	92256736	92257187	452	*	MACS_peak_1705	73.21	Intron (uc001pdj.4/120114, intron 1 of 24)	11	92085262	92629635	544374	1	120114	uc001pdj.4	171474	ENSG00000165323	FAT3	FAT atypical cadherin 3
chr11	92711449	92712014	566	*	MACS_peak_1706	76.55	Intron (uc001pdk.1/4544, intron 1 of 1)	11	92702789	92715948	13160	1	4544	uc001pdk.1	8660	ENSG00000134640	MTNR1B	melatonin receptor 1B
chr11	93875855	93876507	653	*	MACS_peak_1708	62.55	Intron (uc001peq.3/24145, intron 1 of 4)	11	93862094	93915137	53044	1	24145	uc001per.3	13761	ENSG00000110218	PANX1	pannexin 1
chr11	94335750	94336604	855	*	MACS_peak_1710	151.13	Intron (uc010rue.1/143689, intron 12 of 14)	11	94300474	94354587	54114	1	143689	uc001pfa.3	35276	ENSG00000134627	PIWIL4	piwi like RNA-mediated gene silencing 4
chr11	94558107	94558612	506	*	MACS_peak_1711	60.76	Intron (uc001pfb.3/154810, intron 4 of 12)	11	94501508	94609918	108411	1	154810	uc001pfc.3	56599	ENSG00000166025	AMOTL1	angiomotin like 1
chr11	95524070	95524430	361	*	MACS_peak_1717	53.81	Promoter (<=1kb)	11	95523625	95565857	42233	1	9702	uc010ruh.2	445	ENSG00000166037	CEP57	centrosomal protein 57
chr11	95945677	95946092	416	*	MACS_peak_1718	68.31	Intron (uc001pfw.1/84441, intron 1 of 4)	11	96074602	96074690	89	1	100422991	uc021qoz.1	-128510	ENSG00000266192	MIR1260B	microRNA 1260b
chr11	96036211	96036525	315	*	MACS_peak_1719	75.35	Intron (uc001pfw.1/84441, intron 1 of 4)	11	96074602	96074690	89	1	100422991	uc021qoz.1	-38077	ENSG00000266192	MIR1260B	microRNA 1260b
chr11	100558405	100558817	413	*	MACS_peak_1722	83.72	Promoter (<=1kb)	11	100558407	100861656	303250	1	143872	uc001pge.2	0	ENSG00000165895	ARHGAP42	Rho GTPase activating protein 42
chr11	100610455	100610862	408	*	MACS_peak_1723	51.11	Intron (uc001pge.2/143872, intron 1 of 23)	11	100558407	100861656	303250	1	143872	uc001pge.2	52048	ENSG00000165895	ARHGAP42	Rho GTPase activating protein 42
chr11	102473712	102474249	538	*	MACS_peak_1725	95.6	Intron (uc001phc.3/9313, intron 6 of 9)	11	102447566	102496063	48498	2	9313	uc001phc.3	21814	ENSG00000137674	MMP20	matrix metallopeptidase 20
chr11	107879345	107879839	495	*	MACS_peak_1732	105.29	Promoter (<=1kb)	11	107879408	107977565	98158	1	8065	uc001pju.3	0	ENSG00000166266	CUL5	cullin 5
chr11	108093312	108094107	796	*	MACS_peak_1733	91.77	Promoter (<=1kb)	11	108093559	108239826	146268	1	472	uc001pkb.1	0	ENSG00000149311	ATM	ATM serine/threonine kinase
chr11	108149254	108149634	381	*	MACS_peak_1734	89.22	Intron (uc001pkb.1/472, intron 22 of 62)	11	108157905	108161367	3463	1	472	uc001pkd.4	-8271	ENSG00000149311	ATM	ATM serine/threonine kinase
chr11	108535596	108535998	403	*	MACS_peak_1736	51.41	Promoter (<=1kb)	11	108535816	108792970	257155	1	1662	uc001pkl.1	0	ENSG00000178105	DDX10	DEAD-box helicase 10
chr11	110065012	110065430	419	*	MACS_peak_1741	55.38	Intron (uc009yxx.1/5962, intron 15 of 16)	11	110100166	110107396	7231	2	5962	uc001pks.3	41966	ENSG00000137710	RDX	radixin
chr11	110208418	110208774	357	*	MACS_peak_1742	92.78	Intron (uc001pkv.1/uc001pkv.1, intron 3 of 5)	11	110100166	110167437	67272	2	5962	uc010rwe.2	-40981	ENSG00000137710	RDX	radixin
chr11	110220394	110220805	412	*	MACS_peak_1743	68.59	Intron (uc001pkv.1/uc001pkv.1, intron 3 of 5)	11	110100166	110167437	67272	2	5962	uc010rwe.2	-52957	ENSG00000137710	RDX	radixin
chr11	110241870	110242153	284	*	MACS_peak_1744	91.19	Intron (uc001pkv.1/uc001pkv.1, intron 4 of 5)	11	110300661	110335608	34948	1	2230	uc001pkx.3	-58508	ENSG00000137714	FDX1	ferredoxin 1
chr11	111784739	111785422	684	*	MACS_peak_1749	56.33	Promoter (1-2kb)	11	111783460	111789728	6269	1	3316	uc009yyj.2	1279	ENSG00000170276	HSPB2	heat shock protein family B (small) member 2
chr11	112120639	112121066	428	*	MACS_peak_1750	70.9	Intron (uc009yyo.3/5805, intron 6 of 6)	11	112118876	112131583	12708	2	349633	uc009yyp.2	10517	ENSG00000188771	PLET1	placenta expressed transcript 1
chr11	112891720	112892432	713	*	MACS_peak_1753	99.42	Intron (uc001pno.3/4684, intron 1 of 8)	11	112831969	113149158	317190	1	4684	uc021qqp.1	59751	ENSG00000149294	NCAM1	neural cell adhesion molecule 1
chr11	113033291	113033896	606	*	MACS_peak_1754	54.54	Intron (uc001pno.3/4684, intron 1 of 8)	11	113126599	113149158	22560	1	4684	uc001pns.3	-92703	ENSG00000149294	NCAM1	neural cell adhesion molecule 1
chr11	113333265	113333991	727	*	MACS_peak_1755	58.87	Intron (uc001poa.4/1813, intron 1 of 7)	11	113280317	113346001	65685	2	1813	uc001poa.4	12010	ENSG00000149295	DRD2	dopamine receptor D2
chr11	113576822	113577444	623	*	MACS_peak_1756	61.82	Promoter (<=1kb)	11	113558268	113577068	18801	2	80975	uc001poc.4	0	ENSG00000166682	TMPRSS5	transmembrane protease, serine 5
chr11	116771944	116772230	287	*	MACS_peak_1758	82.77	Intron (uc001ppy.3/23387, intron 4 of 23)	11	116714118	116740967	26850	2	23387	uc001ppx.3	-30977	ENSG00000160584	SIK3	SIK family kinase 3
chr11	116908001	116908534	534	*	MACS_peak_1759	59.27	Intron (uc001ppy.3/23387, intron 1 of 23)	11	116714118	116968993	254876	2	23387	uc001ppy.3	60459	ENSG00000160584	SIK3	SIK family kinase 3
chr11	117411552	117412136	585	*	MACS_peak_1760	52.86	Intron (uc001prh.1/57453, intron 3 of 32)	11	117255313	117281417	26105	1	22897	uc001prg.1	156239	ENSG00000110274	CEP164	centrosomal protein 164
chr11	117705357	117705896	540	*	MACS_peak_1761	66.44	Intron (uc021qqy.1/100533181, intron 6 of 10)	11	117690790	117698807	8018	2	486	uc001prk.1	-6550	ENSG00000137731	FXYD2	FXYD domain containing ion transport regulator 2
chr11	118065951	118066340	390	*	MACS_peak_1762	85.97	Intron (uc001psg.2/120425, intron 4 of 4)	11	118064442	118074951	10510	2	120425	uc001psg.2	8611	ENSG00000160593	JAML	junction adhesion molecule like
chr11	118077129	118077681	553	*	MACS_peak_1763	60.29	Promoter (2-3kb)	11	118064442	118074951	10510	2	120425	uc001psg.2	-2178	ENSG00000160593	JAML	junction adhesion molecule like
chr11	118491255	118491851	597	*	MACS_peak_1764	64.58	Intron (uc001ptr.2/23187, intron 5 of 23)	11	118498021	118528748	30728	1	23187	uc001ptv.2	-6170	ENSG00000019144	PHLDB1	pleckstrin homology like domain family B member 1
chr11	119186253	119187048	796	*	MACS_peak_1766	60.1	Promoter (<=1kb)	11	119179234	119187840	8607	2	4162	uc001pwf.3	792	ENSG00000076706	MCAM	melanoma cell adhesion molecule
chr11	119252464	119252780	317	*	MACS_peak_1767	85.97	Promoter (<=1kb)	11	119252488	119369944	117457	1	100499227	uc001pwo.3	0	NA	USP2-AS1	USP2 antisense RNA 1 (head to head)
chr11	120009848	120010072	225	*	MACS_peak_1768	111.89	Promoter (<=1kb)	11	119981994	120008863	26870	2	23650	uc001pxa.3	-985	ENSG00000137699	TRIM29	tripartite motif containing 29
chr11	120127811	120128306	496	*	MACS_peak_1769	57.43	Intron (uc021qrk.1/25833, intron 2 of 12)	11	120120468	120136641	16174	2	649133	uc001pxd.1	8335	ENSG00000259541	LOC649133	uncharacterized LOC649133
chr11	122012459	122013126	668	*	MACS_peak_1773	67.36	Intron (uc009zba.2/399959, intron 3 of 3)	11	122017230	122017301	72	2	406882	uc001pyg.3	4175	ENSG00000198975	MIRLET7A2	microRNA let-7a-2
chr11	123612216	123612561	346	*	MACS_peak_1776	66.37	Promoter (<=1kb)	11	123594997	123612363	17367	2	7753	uc001pzd.1	0	ENSG00000166261	ZNF202	zinc finger protein 202
chr11	124952788	124953488	701	*	MACS_peak_1777	91.84	Promoter (<=1kb)	11	124953035	124956293	3259	1	219855	uc010sav.1	0	ENSG00000134955	SLC37A2	solute carrier family 37 member 2
chr11	125053539	125053840	302	*	MACS_peak_1778	79.27	Intron (uc001qbu.3/63876, intron 1 of 12)	11	125034559	125303285	268727	1	63876	uc010sbb.2	18980	ENSG00000165495	PKNOX2	PBX/knotted 1 homeobox 2
chr11	125071517	125072268	752	*	MACS_peak_1779	150.72	Intron (uc001qbu.3/63876, intron 1 of 12)	11	125034559	125303285	268727	1	63876	uc010sbb.2	36958	ENSG00000165495	PKNOX2	PBX/knotted 1 homeobox 2
chr11	125084736	125085064	329	*	MACS_peak_1780	160.9	Intron (uc001qbu.3/63876, intron 1 of 12)	11	125034559	125303285	268727	1	63876	uc010sbb.2	50177	ENSG00000165495	PKNOX2	PBX/knotted 1 homeobox 2
chr11	125204916	125205552	637	*	MACS_peak_1781	194.15	Intron (uc001qbu.3/63876, intron 3 of 12)	11	125281359	125303285	21927	1	63876	uc001qbv.3	-75807	ENSG00000165495	PKNOX2	PBX/knotted 1 homeobox 2
chr11	126177871	126178453	583	*	MACS_peak_1783	59.8	Intron (uc001qdp.3/28960, intron 2 of 5)	11	126173647	126215644	41998	1	28960	uc001qdp.3	4224	ENSG00000110063	DCPS	decapping enzyme, scavenger
chr11	126243160	126243877	718	*	MACS_peak_1784	147.88	Intron (uc001qds.3/6484, intron 1 of 10)	11	126225789	126284536	58748	1	6484	uc001qdu.3	17371	ENSG00000110080	ST3GAL4	ST3 beta-galactoside alpha-2,3-sialyltransferase 4
chr11	126264330	126265097	768	*	MACS_peak_1785	129.59	Intron (uc001qds.3/6484, intron 1 of 10)	11	126273311	126284536	11226	1	6484	uc021qry.1	-8214	ENSG00000110080	ST3GAL4	ST3 beta-galactoside alpha-2,3-sialyltransferase 4
chr11	126280449	126280764	316	*	MACS_peak_1786	61.01	Intron (uc001qds.3/6484, intron 9 of 10)	11	126277129	126284536	7408	1	6484	uc001qdz.3	3320	ENSG00000110080	ST3GAL4	ST3 beta-galactoside alpha-2,3-sialyltransferase 4
chr11	126471542	126472271	730	*	MACS_peak_1787	89.75	Intron (uc001qea.3/84623, intron 1 of 16)	11	126277129	126284536	7408	1	6484	uc001qdz.3	194413	ENSG00000110080	ST3GAL4	ST3 beta-galactoside alpha-2,3-sialyltransferase 4
chr11	126558769	126559325	557	*	MACS_peak_1788	51.8	Intron (uc001qea.3/84623, intron 1 of 16)	11	126810642	126814986	4345	1	100874251	uc001qee.2	-251317	ENSG00000254960	KIRREL3-AS2	KIRREL3 antisense RNA 2
chr11	128337164	128337873	710	*	MACS_peak_1794	59.7	Intron (uc009zcg.2/2113, intron 6 of 6)	11	128328656	128392205	63550	2	2113	uc009zcg.2	54332	ENSG00000134954	ETS1	ETS proto-oncogene 1, transcription factor
chr11	128373429	128373972	544	*	MACS_peak_1795	125.55	Intron (uc009zcg.2/2113, intron 1 of 6)	11	128328656	128392205	63550	2	2113	uc009zcg.2	18233	ENSG00000134954	ETS1	ETS proto-oncogene 1, transcription factor
chr11	128392418	128392969	552	*	MACS_peak_1796	107.85	Promoter (<=1kb)	11	128328656	128392205	63550	2	2113	uc010sbs.1	-213	ENSG00000134954	ETS1	ETS proto-oncogene 1, transcription factor
chr11	128402309	128403144	836	*	MACS_peak_1797	258.38	Intron (uc001qej.2/2113, intron 3 of 9)	11	128328656	128392205	63550	2	2113	uc010sbs.1	-10104	ENSG00000134954	ETS1	ETS proto-oncogene 1, transcription factor
chr11	128452588	128453107	520	*	MACS_peak_1798	56.26	Intron (uc001qej.2/2113, intron 1 of 9)	11	128328656	128457453	128798	2	2113	uc001qej.2	4346	ENSG00000134954	ETS1	ETS proto-oncogene 1, transcription factor
chr11	131535918	131536306	389	*	MACS_peak_1800	89.22	Intron (uc001qgm.3/50863, intron 1 of 7)	11	131779500	132206716	427217	1	50863	uc010scj.2	-243194	ENSG00000182667	NTM	neurotrimin
chr11	131803901	131804704	804	*	MACS_peak_1801	78.05	Intron (uc001qgm.3/50863, intron 2 of 7)	11	131780712	132206716	426005	1	50863	uc001qgq.3	23189	ENSG00000182667	NTM	neurotrimin
chr11	131917790	131918291	502	*	MACS_peak_1802	60.81	Intron (uc001qgm.3/50863, intron 2 of 7)	11	131780712	132206716	426005	1	50863	uc001qgq.3	137078	ENSG00000182667	NTM	neurotrimin
chr11	131934811	131935224	414	*	MACS_peak_1803	57.9	Intron (uc001qgm.3/50863, intron 2 of 7)	11	131780712	132206716	426005	1	50863	uc001qgq.3	154099	ENSG00000182667	NTM	neurotrimin
chr11	132765121	132765554	434	*	MACS_peak_1804	51.33	Intron (uc001qgs.3/4978, intron 1 of 6)	11	132284875	132813037	528163	2	4978	uc001qgs.3	47483	ENSG00000183715	OPCML	opioid binding protein/cell adhesion molecule like
chr11	132768264	132769150	887	*	MACS_peak_1805	65.87	Intron (uc001qgs.3/4978, intron 1 of 6)	11	132284875	132813037	528163	2	4978	uc001qgs.3	43887	ENSG00000183715	OPCML	opioid binding protein/cell adhesion molecule like
chr11	133378380	133378715	336	*	MACS_peak_1806	115.58	Intron (uc001qgu.3/4978, intron 1 of 7)	11	132284875	133402403	1117529	2	4978	uc001qgu.3	23688	ENSG00000183715	OPCML	opioid binding protein/cell adhesion molecule like
chr12	650579	651320	742	*	MACS_peak_1809	72.52	Promoter (<=1kb)	12	652299	664596	12298	1	283358	uc001qij.1	-979	ENSG00000139044	B4GALNT3	beta-1,4-N-acetyl-galactosaminyltransferase 3
chr12	661639	661964	326	*	MACS_peak_1810	69.3	Promoter (<=1kb)	12	661699	671058	9360	1	283358	uc001qik.1	0	ENSG00000139044	B4GALNT3	beta-1,4-N-acetyl-galactosaminyltransferase 3
chr12	679124	679373	250	*	MACS_peak_1811	87.3	Intron (uc001qil.3/4815, intron 1 of 3)	12	661699	671058	9360	1	283358	uc001qik.1	17425	ENSG00000139044	B4GALNT3	beta-1,4-N-acetyl-galactosaminyltransferase 3
chr12	741058	741844	787	*	MACS_peak_1812	64.6	Exon (uc001qim.1/uc001qim.1, exon 2 of 5)	12	674526	752802	78277	2	4815	uc010sdr.2	10958	ENSG00000171840	NINJ2	ninjurin 2
chr12	1325811	1326068	258	*	MACS_peak_1814	82.77	Intron (uc001qiz.2/23085, intron 12 of 19)	12	1299025	1605099	306075	1	23085	uc001qje.2	26786	ENSG00000082805	ERC1	ELKS/RAB6-interacting/CAST family member 1
chr12	1867759	1868698	940	*	MACS_peak_1815	70.77	Intron (uc001qjm.3/79602, intron 2 of 7)	12	1904834	1920889	16056	2	93589	uc021qsy.1	52191	ENSG00000151062	CACNA2D4	calcium voltage-gated channel auxiliary subunit alpha2delta 4
chr12	2040075	2040549	475	*	MACS_peak_1816	51.94	Exon (uc001qjw.3/100271702, exon 2 of 2)	12	2038368	2045742	7375	2	100271702	uc001qjw.3	5193	ENSG00000235049	LINC00940	long intergenic non-protein coding RNA 940
chr12	2113518	2114019	502	*	MACS_peak_1817	71.4	Promoter (<=1kb)	12	2050757	2113677	62921	2	196513	uc010sdy.1	0	ENSG00000151065	DCP1B	decapping mRNA 1B
chr12	2667047	2667527	481	*	MACS_peak_1818	54.89	Intron (uc001qjz.2/775, intron 11 of 46)	12	2614008	2675748	61741	1	775	uc001qkv.1	53039	ENSG00000151067	CACNA1C	calcium voltage-gated channel subunit alpha1 C
chr12	2921848	2922330	483	*	MACS_peak_1819	182.98	Promoter (<=1kb)	12	2921787	2939770	17984	1	55846	uc010sec.2	61	ENSG00000111203	ITFG2	integrin alpha FG-GAP repeat containing 2
chr12	3981978	3982635	658	*	MACS_peak_1822	87.73	Promoter (<=1kb)	12	3918027	3982608	64582	2	57097	uc001qml.2	0	ENSG00000111224	PARP11	poly(ADP-ribose) polymerase family member 11
chr12	4647461	4648383	923	*	MACS_peak_1824	91.69	Promoter (<=1kb)	12	4647950	4669213	21264	1	10635	uc001qmu.3	0	ENSG00000111247	RAD51AP1	RAD51 associated protein 1
chr12	6012630	6012920	291	*	MACS_peak_1827	63.51	Intron (uc001qnm.2/57101, intron 3 of 25)	12	5935624	6054425	118802	2	57101	uc021qtt.1	41505	ENSG00000047617	ANO2	anoctamin 2
chr12	6157978	6158284	307	*	MACS_peak_1828	76.28	Intron (uc001qnn.1/7450, intron 16 of 51)	12	6058040	6233836	175797	2	7450	uc001qnn.1	75552	ENSG00000110799	VWF	von Willebrand factor
chr12	6171901	6172506	606	*	MACS_peak_1829	55.03	Exon (uc001qnn.1/7450, exon 13 of 52)	12	6058040	6233836	175797	2	7450	uc001qnn.1	61330	ENSG00000110799	VWF	von Willebrand factor
chr12	6339784	6340529	746	*	MACS_peak_1832	99.83	Intron (uc010seu.2/928, intron 2 of 2)	12	6309482	6347437	37956	1	928	uc001qnq.2	30302	ENSG00000010278	CD9	CD9 molecule
chr12	6560624	6561123	500	*	MACS_peak_1835	54.82	Promoter (<=1kb)	12	6548167	6560681	12515	2	678655	uc001qob.2	0	ENSG00000215039	CD27-AS1	CD27 antisense RNA 1
chr12	6642513	6643707	1195	*	MACS_peak_1836	124.58	Promoter (<=1kb)	12	6643585	6647537	3953	1	2597	uc001qop.2	0	ENSG00000111640	GAPDH	glyceraldehyde-3-phosphate dehydrogenase
chr12	6797907	6798927	1021	*	MACS_peak_1838	72.71	Promoter (<=1kb)	12	6775643	6798541	22899	2	171017	uc001qqa.3	0	ENSG00000126746	ZNF384	zinc finger protein 384
chr12	6832816	6833724	909	*	MACS_peak_1839	141.67	Promoter (<=1kb)	12	6833150	6841041	7892	1	50813	uc001qqj.3	0	ENSG00000111652	COPS7A	COP9 signalosome subunit 7A
chr12	6961456	6962022	567	*	MACS_peak_1840	78.75	Promoter (<=1kb)	12	6961285	6975795	14511	1	8078	uc001qri.4	171	ENSG00000111667	USP5	ubiquitin specific peptidase 5
chr12	7079752	7080471	720	*	MACS_peak_1841	68.76	Promoter (<=1kb)	12	7079944	7085136	5193	1	10436	uc009zfo.2	0	ENSG00000126749	EMG1	EMG1, N1-specific pseudouridine methyltransferase
chr12	8088649	8089121	473	*	MACS_peak_1843	62.92	Promoter (<=1kb)	12	8071824	8088892	17069	2	6515	uc001qtr.3	0	ENSG00000059804	SLC2A3	solute carrier family 2 member 3
chr12	8988948	8989387	440	*	MACS_peak_1845	54.18	Intron (uc001quz.5/144568, intron 7 of 35)	12	8995730	9028414	32685	1	144568	uc001qva.1	-6343	ENSG00000166535	A2ML1	alpha-2-macroglobulin like 1
chr12	9101868	9102893	1026	*	MACS_peak_1846	185.59	Promoter (<=1kb)	12	9092957	9102357	9401	2	4074	uc001qvf.3	0	ENSG00000003056	M6PR	mannose-6-phosphate receptor, cation dependent
chr12	9460412	9460946	535	*	MACS_peak_1847	52.27	Intron (uc010sgp.1/642846, intron 18 of 21)	12	9453690	9464427	10738	1	642846	uc001qvp.2	6722	NA	LOC642846	DEAD/H (Asp-Glu-Ala-Asp/His) box polypeptide 11-like
chr12	9575783	9576393	611	*	MACS_peak_1848	72.81	Intron (uc001qvx.4/440081, intron 18 of 26)	12	9570307	9572677	2371	2	440081	uc001qvy.1	-3106	NA	DDX12P	DEAD/H-box helicase 12, pseudogene
chr12	10220492	10220889	398	*	MACS_peak_1849	66.25	Downstream (2-3kb)	12	10223080	10251605	28526	2	51267	uc001qxb.3	30716	ENSG00000150048	CLEC1A	C-type lectin domain family 1 member A
chr12	10364640	10365410	771	*	MACS_peak_1850	77.24	Promoter (<=1kb)	12	10365489	10373561	8073	1	23710	uc010shb.1	-79	ENSG00000139112	GABARAPL1	GABA type A receptor associated protein like 1
chr12	10765796	10766449	654	*	MACS_peak_1852	55.36	Promoter (<=1kb)	12	10756364	10766208	9845	2	55110	uc001qyq.2	0	ENSG00000111196	MAGOHB	mago homolog B, exon junction complex core component
chr12	10874572	10875230	659	*	MACS_peak_1853	60.75	Promoter (<=1kb)	12	10851676	10875953	24278	2	8531	uc001qyt.3	723	ENSG00000060138	YBX3	Y-box binding protein 3
chr12	11380274	11380939	666	*	MACS_peak_1854	59.68	Intron (uc001qzf.2/5545, intron 3 of 3)	12	11338599	11339543	945	2	353164	uc001qzr.1	-40731	ENSG00000186136	TAS2R42	taste 2 receptor member 42
chr12	11801717	11802178	462	*	MACS_peak_1855	59.4	Promoter (<=1kb)	12	11802788	12048325	245538	1	2120	uc001qzz.3	-610	ENSG00000139083	ETV6	ETS variant 6
chr12	11870443	11870766	324	*	MACS_peak_1856	58.35	Intron (uc001qzz.3/2120, intron 1 of 7)	12	11802788	12048325	245538	1	2120	uc001qzz.3	67655	ENSG00000139083	ETV6	ETS variant 6
chr12	12171460	12171955	496	*	MACS_peak_1857	57.14	Intron (uc001raa.1/2120, intron 1 of 1)	12	12223878	12252627	28750	1	79370	uc001rac.3	-51923	ENSG00000121380	BCL2L14	BCL2 like 14
chr12	12419907	12420399	493	*	MACS_peak_1858	60.39	Promoter (<=1kb)	12	12274020	12419811	145792	2	4040	uc010shl.1	-96	ENSG00000070018	LRP6	LDL receptor related protein 6
chr12	12764482	12764980	499	*	MACS_peak_1859	113.43	Promoter (<=1kb)	12	12764831	12798041	33211	1	1389	uc001rap.1	0	ENSG00000111269	CREBL2	cAMP responsive element binding protein like 2
chr12	12878185	12878842	658	*	MACS_peak_1860	128.01	Promoter (<=1kb)	12	12878851	12982915	104065	1	51202	uc001rav.3	-9	ENSG00000213782	DDX47	DEAD-box helicase 47
chr12	12911755	12912152	398	*	MACS_peak_1861	80.31	Intron (uc001rau.4/81575, intron 1 of 1)	12	12917583	12917677	95	1	693198	uc021qvl.1	-5431	ENSG00000207983	MIR613	microRNA 613
chr12	12937606	12938192	587	*	MACS_peak_1862	74.57	Promoter (<=1kb)	12	12938541	12944399	5859	1	81575	uc001raw.4	-349	ENSG00000178878	APOLD1	apolipoprotein L domain containing 1
chr12	13052493	13053454	962	*	MACS_peak_1863	136.44	Intron (uc001rba.3/9052, intron 1 of 3)	12	13043956	13066600	22645	1	9052	uc001rba.3	8537	ENSG00000013588	GPRC5A	G protein-coupled receptor class C group 5 member A
chr12	13250955	13251455	501	*	MACS_peak_1866	101.86	Promoter (2-3kb)	12	13236471	13248740	12270	2	83445	uc001rbm.3	-2215	ENSG00000111305	GSG1	germ cell associated 1
chr12	14518463	14518966	504	*	MACS_peak_1872	58.68	Promoter (<=1kb)	12	14518611	14614067	95457	1	55729	uc010shs.1	0	ENSG00000171681	ATF7IP	activating transcription factor 7 interacting protein
chr12	14989630	14990370	741	*	MACS_peak_1873	72.58	Intron (uc001rcl.1/420, intron 2 of 2)	12	14982245	14996413	14169	2	420	uc001rcl.1	6043	ENSG00000111339	ART4	ADP-ribosyltransferase 4 (Dombrock blood group)
chr12	15065992	15066740	749	*	MACS_peak_1877	116.71	Downstream (<1kb)	12	15066976	15091463	24488	2	121506	uc001rco.3	24723	ENSG00000139055	ERP27	endoplasmic reticulum protein 27
chr12	15076842	15077321	480	*	MACS_peak_1878	91.67	Intron (uc001rco.3/121506, intron 3 of 6)	12	15066976	15091463	24488	2	121506	uc001rco.3	14142	ENSG00000139055	ERP27	endoplasmic reticulum protein 27
chr12	15737143	15737558	416	*	MACS_peak_1880	55.56	Intron (uc001rcv.2/5800, intron 23 of 26)	12	15699278	15751265	51988	1	5800	uc001rda.2	37865	ENSG00000151490	PTPRO	protein tyrosine phosphatase, receptor type O
chr12	15781749	15782480	732	*	MACS_peak_1881	51.89	Intron (uc010shv.2/2059, intron 11 of 13)	12	15773075	15815626	42552	2	2059	uc010shv.2	33146	ENSG00000151491	EPS8	epidermal growth factor receptor pathway substrate 8
chr12	15823785	15824370	586	*	MACS_peak_1882	56.09	5' UTR	12	15773075	15815626	42552	2	2059	uc010shv.2	-8159	ENSG00000151491	EPS8	epidermal growth factor receptor pathway substrate 8
chr12	15873215	15873734	520	*	MACS_peak_1883	58.87	Intron (uc001rdb.3/2059, intron 1 of 20)	12	15773075	15865859	92785	2	2059	uc009zif.3	-7356	ENSG00000151491	EPS8	epidermal growth factor receptor pathway substrate 8
chr12	15932555	15933655	1101	*	MACS_peak_1884	97.27	Intron (uc001rdb.3/2059, intron 1 of 20)	12	15773075	15942510	169436	2	2059	uc001rdb.3	8855	ENSG00000151491	EPS8	epidermal growth factor receptor pathway substrate 8
chr12	16064685	16065084	400	*	MACS_peak_1887	59.33	Promoter (<=1kb)	12	16064186	16190315	126130	1	51071	uc001rde.3	499	ENSG00000023697	DERA	deoxyribose-phosphate aldolase
chr12	19592132	19592632	501	*	MACS_peak_1891	58.87	Promoter (<=1kb)	12	19592608	19675173	82566	1	121536	uc001ree.2	0	ENSG00000139154	AEBP2	AE binding protein 2
chr12	20704212	20705019	808	*	MACS_peak_1893	200.66	Intron (uc001reh.2/5139, intron 1 of 15)	12	20724798	20837041	112244	1	5139	uc021qwa.1	-19779	ENSG00000172572	PDE3A	phosphodiesterase 3A
chr12	20985981	20986322	342	*	MACS_peak_1894	56.41	Intron (uc031qgp.1/28234, intron 2 of 7)	12	20975497	21008103	32607	1	28234	uc031qgq.1	10484	ENSG00000111700	SLCO1B3	solute carrier organic anion transporter family member 1B3
chr12	22403496	22404206	711	*	MACS_peak_1897	86.11	Intron (uc001rfo.4/6489, intron 3 of 4)	12	22346325	22487648	141324	2	6489	uc001rfo.4	83442	ENSG00000111728	ST8SIA1	ST8 alpha-N-acetyl-neuraminide alpha-2,8-sialyltransferase 1
chr12	22415220	22415908	689	*	MACS_peak_1898	117.17	Intron (uc001rfo.4/6489, intron 2 of 4)	12	22346325	22487648	141324	2	6489	uc001rfo.4	71740	ENSG00000111728	ST8SIA1	ST8 alpha-N-acetyl-neuraminide alpha-2,8-sialyltransferase 1
chr12	22474391	22474821	431	*	MACS_peak_1899	68.34	Intron (uc001rfo.4/6489, intron 1 of 4)	12	22346325	22487648	141324	2	6489	uc001rfo.4	12827	ENSG00000111728	ST8SIA1	ST8 alpha-N-acetyl-neuraminide alpha-2,8-sialyltransferase 1
chr12	22777914	22778195	282	*	MACS_peak_1901	80.26	Promoter (<=1kb)	12	22778076	22797349	19274	1	55500	uc001rfs.3	0	ENSG00000139163	ETNK1	ethanolamine kinase 1
chr12	23251485	23252237	753	*	MACS_peak_1904	50.55	Intron (uc001rfu.1/uc001rfu.1, intron 8 of 8)	12	22778076	22843608	65533	1	55500	uc009ziz.3	473409	ENSG00000139163	ETNK1	ethanolamine kinase 1
chr12	23688445	23688801	357	*	MACS_peak_1906	53.81	Intron (uc001rfv.4/6660, intron 6 of 6)	12	23685231	23737546	52316	2	6660	uc001rfv.4	48745	ENSG00000134532	SOX5	SRY-box 5
chr12	23781616	23782269	654	*	MACS_peak_1907	108.99	Intron (uc001rfw.3/6660, intron 8 of 14)	12	23685231	23737546	52316	2	6660	uc001rfv.4	-44070	ENSG00000134532	SOX5	SRY-box 5
chr12	24059269	24059663	395	*	MACS_peak_1908	104.79	Intron (uc001rfw.3/6660, intron 1 of 14)	12	23685231	24102637	417407	2	6660	uc001rfw.3	42974	ENSG00000134532	SOX5	SRY-box 5
chr12	24103766	24104309	544	*	MACS_peak_1909	62.25	Promoter (<=1kb)	12	23685231	24103966	418736	2	6660	uc010siv.3	0	ENSG00000134532	SOX5	SRY-box 5
chr12	24198715	24199185	471	*	MACS_peak_1910	65.35	Intron (uc001rfx.4/6660, intron 4 of 17)	12	23689387	24103966	414580	2	6660	uc010siw.1	-94749	ENSG00000134532	SOX5	SRY-box 5
chr12	24222896	24223221	326	*	MACS_peak_1911	101.39	Intron (uc001rfx.4/6660, intron 4 of 17)	12	23689387	24103966	414580	2	6660	uc010siw.1	-118930	ENSG00000134532	SOX5	SRY-box 5
chr12	24663623	24664158	536	*	MACS_peak_1912	58.92	Intron (uc001rfx.4/6660, intron 1 of 17)	12	23685231	24715383	1030153	2	6660	uc001rfx.4	51225	ENSG00000134532	SOX5	SRY-box 5
chr12	25671338	25672007	670	*	MACS_peak_1916	79.76	Exon (uc001rgs.2/160492, exon 7 of 9)	12	25629016	25706217	77202	2	160492	uc001rgs.2	34210	ENSG00000152936	LMNTD1	lamin tail domain containing 1
chr12	25767824	25768372	549	*	MACS_peak_1917	60.33	Intron (uc010sjj.3/160492, intron 1 of 7)	12	25649251	25801496	152246	2	160492	uc010sjj.3	33124	ENSG00000152936	LMNTD1	lamin tail domain containing 1
chr12	26115662	26116458	797	*	MACS_peak_1920	152.9	Intron (uc001rgw.2/11228, intron 1 of 2)	12	26107588	26112375	4788	2	100506451	uc021qwf.1	-3287	NA	RASSF8-AS1	RASSF8 antisense RNA 1
chr12	26491987	26492707	721	*	MACS_peak_1925	280.97	3' UTR	12	26348506	26405853	57348	1	8082	uc009zjf.2	143481	ENSG00000123096	SSPN	sarcospan
chr12	26527999	26528558	560	*	MACS_peak_1926	51.65	Intron (uc001rhg.3/3709, intron 55 of 56)	12	26540367	26647273	106907	2	3709	uc009zjg.1	118715	ENSG00000123104	ITPR2	inositol 1,4,5-trisphosphate receptor type 2
chr12	27071919	27072780	862	*	MACS_peak_1927	65.06	Promoter (1-2kb)	12	27058112	27070666	12555	2	55726	uc001rhj.4	-1253	ENSG00000064102	INTS13	integrator complex subunit 13
chr12	27165331	27166011	681	*	MACS_peak_1928	50.67	Promoter (1-2kb)	12	27124506	27167339	42834	2	51768	uc010sjl.2	1328	ENSG00000064115	TM7SF3	transmembrane 7 superfamily member 3
chr12	27236791	27237124	334	*	MACS_peak_1929	73.24	Promoter (1-2kb)	12	27233990	27235455	1466	2	728858	uc001rhq.3	-1336	ENSG00000214700	C12orf71	chromosome 12 open reading frame 71
chr12	27396983	27397752	770	*	MACS_peak_1930	54.45	Promoter (<=1kb)	12	27397078	27478890	81813	1	23012	uc001rhr.3	0	ENSG00000211455	STK38L	serine/threonine kinase 38 like
chr12	27702743	27703402	660	*	MACS_peak_1931	53.71	Intron (uc001rhy.1/8496, intron 1 of 3)	12	27677045	27848497	171453	1	8496	uc001rid.2	25698	ENSG00000110841	PPFIBP1	PPFIA binding protein 1
chr12	27717632	27718063	432	*	MACS_peak_1932	61.54	Intron (uc001rhy.1/8496, intron 1 of 3)	12	27677045	27848497	171453	1	8496	uc001rid.2	40587	ENSG00000110841	PPFIBP1	PPFIA binding protein 1
chr12	27737658	27738176	519	*	MACS_peak_1933	53.79	Intron (uc001rhy.1/8496, intron 2 of 3)	12	27677045	27848497	171453	1	8496	uc001rid.2	60613	ENSG00000110841	PPFIBP1	PPFIA binding protein 1
chr12	27757298	27757983	686	*	MACS_peak_1934	68.52	Intron (uc001rhy.1/8496, intron 2 of 3)	12	27829706	27848497	18792	1	8496	uc001rif.2	-71723	ENSG00000110841	PPFIBP1	PPFIA binding protein 1
chr12	27863346	27863941	596	*	MACS_peak_1935	52.34	Promoter (<=1kb)	12	27863706	27909237	45532	1	60488	uc001rih.3	0	ENSG00000061794	MRPS35	mitochondrial ribosomal protein S35
chr12	28342771	28344338	1568	*	MACS_peak_1938	88.95	Intron (uc001rio.3/55297, intron 2 of 14)	12	28332210	28703099	370890	1	55297	uc001rio.3	10561	ENSG00000123106	CCDC91	coiled-coil domain containing 91
chr12	28394942	28395616	675	*	MACS_peak_1939	59.25	Intron (uc001rio.3/55297, intron 2 of 14)	12	28408937	28703099	294163	1	55297	uc009zjk.3	-13321	ENSG00000123106	CCDC91	coiled-coil domain containing 91
chr12	29470784	29471189	406	*	MACS_peak_1942	70.7	Intron (uc001ris.5/55711, intron 9 of 11)	12	29493579	29534143	40565	2	51290	uc001riv.3	62954	ENSG00000087502	ERGIC2	ERGIC and golgi 2
chr12	29608068	29608369	302	*	MACS_peak_1943	76.11	Exon (uc001rix.1/341350, exon 20 of 28)	12	29580489	29650619	70131	2	341350	uc001rix.1	42250	ENSG00000187950	OVCH1	ovochymase 1
chr12	29669338	29669659	322	*	MACS_peak_1944	58.73	Promoter (2-3kb)	12	29653746	29672387	18642	2	83857	uc001riy.3	2728	ENSG00000133687	TMTC1	transmembrane and tetratricopeptide repeat containing 1
chr12	29725389	29725664	276	*	MACS_peak_1945	86.71	Intron (uc001riz.3/83857, intron 4 of 13)	12	29653746	29672387	18642	2	83857	uc001riy.3	-53002	ENSG00000133687	TMTC1	transmembrane and tetratricopeptide repeat containing 1
chr12	29896442	29897253	812	*	MACS_peak_1946	147.94	Promoter (<=1kb)	12	29653746	29897921	244176	2	83857	uc001rja.3	668	ENSG00000133687	TMTC1	transmembrane and tetratricopeptide repeat containing 1
chr12	30810246	30810612	367	*	MACS_peak_1950	63.51	Intron (uc010sjt.2/10526, intron 12 of 20)	12	30781923	30816588	34666	2	10526	uc001rje.1	5976	ENSG00000133704	IPO8	importin 8
chr12	31231495	31231961	467	*	MACS_peak_1952	55.61	Intron (uc010sjw.1/1663, intron 2 of 6)	12	31173697	31226781	53085	2	100506660	uc001rjq.2	-4714	ENSG00000245614	DDX11-AS1	DDX11 antisense RNA 1
chr12	31251717	31252193	477	*	MACS_peak_1953	62.08	Intron (uc001rjr.1/1663, intron 18 of 26)	12	31255361	31257725	2365	1	1663	uc009zjo.1	-3168	ENSG00000013573	DDX11	DEAD/H-box helicase 11
chr12	31358879	31359518	640	*	MACS_peak_1954	89.66	Exon (uc010sjy.1/uc010sjy.1, exon 1 of 30)	12	31433520	31451455	17936	2	58516	uc001rkc.3	91937	ENSG00000139146	SINHCAF	SIN3-HDAC complex associated factor
chr12	32353606	32354465	860	*	MACS_peak_1958	106.17	Intron (uc001rku.3/636, intron 1 of 9)	12	32260185	32531141	270957	1	636	uc010skd.2	93421	ENSG00000151746	BICD1	BICD cargo adaptor 1
chr12	32756754	32757174	421	*	MACS_peak_1959	55.27	Intron (uc001rlc.3/121512, intron 7 of 16)	12	32734894	32797685	62792	1	121512	uc001rlb.1	21860	ENSG00000139132	FGD4	FYVE, RhoGEF and PH domain containing 4
chr12	39084257	39084803	547	*	MACS_peak_1965	91.55	Intron (uc001rlr.1/144402, intron 3 of 7)	12	39046002	39115024	69023	2	144402	uc001rlr.1	30221	ENSG00000139117	CPNE8	copine 8
chr12	39298459	39299803	1345	*	MACS_peak_1966	91.32	Promoter (<=1kb)	12	39046002	39299420	253419	2	144402	uc001rls.1	0	ENSG00000139117	CPNE8	copine 8
chr12	39688425	39688946	522	*	MACS_peak_1970	56.16	Intron (uc001rlt.3/55605, intron 6 of 6)	12	39687030	39706628	19599	2	55605	uc001rlt.3	17682	ENSG00000139116	KIF21A	kinesin family member 21A
chr12	41132636	41133031	396	*	MACS_peak_1971	62.66	Intron (uc009zjy.3/1272, intron 1 of 15)	12	41086244	41466213	379970	1	1272	uc001rmm.2	46392	ENSG00000018236	CNTN1	contactin 1
chr12	41145748	41146203	456	*	MACS_peak_1972	53.3	Intron (uc009zjy.3/1272, intron 1 of 15)	12	41086244	41466213	379970	1	1272	uc001rmm.2	59504	ENSG00000018236	CNTN1	contactin 1
chr12	41247122	41247516	395	*	MACS_peak_1973	89.22	Intron (uc009zjy.3/1272, intron 1 of 15)	12	41221740	41366519	144780	1	1272	uc001rmo.4	25382	ENSG00000018236	CNTN1	contactin 1
chr12	41382100	41382642	543	*	MACS_peak_1974	83.5	Intron (uc001rmm.2/1272, intron 16 of 23)	12	41302159	41466213	164055	1	1272	uc031qgz.1	79941	ENSG00000018236	CNTN1	contactin 1
chr12	41622351	41622651	301	*	MACS_peak_1975	69.1	Intron (uc010skn.2/29951, intron 3 of 9)	12	41582250	41968392	386143	1	29951	uc010skn.2	40101	ENSG00000165966	PDZRN4	PDZ domain containing ring finger 4
chr12	41696569	41697516	948	*	MACS_peak_1976	101.21	Intron (uc010skn.2/29951, intron 3 of 9)	12	41582250	41968392	386143	1	29951	uc010skn.2	114319	ENSG00000165966	PDZRN4	PDZ domain containing ring finger 4
chr12	42538618	42539162	545	*	MACS_peak_1977	51.82	Promoter (<=1kb)	12	42475648	42538673	63026	2	283464	uc001rms.4	0	ENSG00000151233	GXYLT1	glucoside xylosyltransferase 1
chr12	42606895	42607186	292	*	MACS_peak_1978	83	Intron (uc001rmv.3/10138, intron 2 of 3)	12	42550907	42632154	81248	2	10138	uc001rmv.3	24968	ENSG00000015153	YAF2	YY1 associated factor 2
chr12	42719547	42720006	460	*	MACS_peak_1979	79.35	Promoter (<=1kb)	12	42719947	42793227	73281	1	51535	uc001rna.3	0	ENSG00000134283	PPHLN1	periphilin 1
chr12	42918531	42918885	355	*	MACS_peak_1980	105.71	Intron (uc001rnm.3/144165, intron 1 of 7)	12	42852140	42877797	25658	2	144165	uc010skw.2	-40734	ENSG00000139174	PRICKLE1	prickle planar cell polarity protein 1
chr12	44230230	44230779	550	*	MACS_peak_1985	262.74	Promoter (<=1kb)	12	44229962	44783541	553580	1	84216	uc009zkc.3	268	ENSG00000139173	TMEM117	transmembrane protein 117
chr12	44278630	44279280	651	*	MACS_peak_1986	88.58	Intron (uc001rod.3/84216, intron 2 of 7)	12	44229962	44783541	553580	1	84216	uc009zkc.3	48668	ENSG00000139173	TMEM117	transmembrane protein 117
chr12	44331710	44332102	393	*	MACS_peak_1987	103.9	Intron (uc001rod.3/84216, intron 2 of 7)	12	44229962	44783541	553580	1	84216	uc009zkc.3	101748	ENSG00000139173	TMEM117	transmembrane protein 117
chr12	44766072	44766546	475	*	MACS_peak_1988	58.5	Intron (uc001rod.3/84216, intron 6 of 7)	12	44902058	45269444	367387	2	4753	uc001rof.3	502898	ENSG00000184613	NELL2	neural EGFL like 2
chr12	45609592	45609999	408	*	MACS_peak_1989	98.98	Promoter (<=1kb)	12	45609770	45815056	205287	1	196527	uc031qha.1	0	ENSG00000177119	ANO6	anoctamin 6
chr12	45650865	45651203	339	*	MACS_peak_1990	56.41	Intron (uc031qha.1/196527, intron 1 of 17)	12	45686466	45826134	139669	1	196527	uc010slg.2	-35263	ENSG00000177119	ANO6	anoctamin 6
chr12	45667407	45667848	442	*	MACS_peak_1991	70.13	Intron (uc031qha.1/196527, intron 1 of 17)	12	45686466	45826134	139669	1	196527	uc010slg.2	-18618	ENSG00000177119	ANO6	anoctamin 6
chr12	46384297	46384936	640	*	MACS_peak_1993	75.88	Promoter (<=1kb)	12	46312914	46384401	71488	2	9169	uc001rox.3	0	ENSG00000139218	SCAF11	SR-related CTD associated factor 11
chr12	48147249	48147694	446	*	MACS_peak_1995	55.79	Intron (uc009zkp.3/10411, intron 1 of 26)	12	48128453	48152181	23729	2	10411	uc009zkp.3	4487	ENSG00000079337	RAPGEF3	Rap guanine nucleotide exchange factor 3
chr12	48192869	48193689	821	*	MACS_peak_1996	122.99	Promoter (<=1kb)	12	48189990	48192923	2934	2	51564	uc009zkv.1	0	ENSG00000061273	HDAC7	histone deacetylase 7
chr12	48275564	48275883	320	*	MACS_peak_1997	61.01	Intron (uc001rql.3/7421, intron 2 of 9)	12	48235320	48298814	63495	2	7421	uc001rql.3	22931	ENSG00000111424	VDR	vitamin D receptor
chr12	48513178	48513832	655	*	MACS_peak_1999	63.27	Promoter (<=1kb)	12	48513013	48540187	27175	1	5213	uc001rrd.3	165	ENSG00000152556	PFKM	phosphofructokinase, muscle
chr12	49110092	49111055	964	*	MACS_peak_2000	108.32	Promoter (<=1kb)	12	49082241	49110781	28541	2	904	uc001rsd.4	0	ENSG00000129315	CCNT1	cyclin T1
chr12	49412156	49413119	964	*	MACS_peak_2001	82.9	Promoter (<=1kb)	12	49396055	49412531	16477	2	5571	uc010smd.2	0	ENSG00000181929	PRKAG1	protein kinase AMP-activated non-catalytic subunit gamma 1
chr12	49883392	49883726	335	*	MACS_peak_2004	69.1	Intron (uc001rud.2/65244, intron 5 of 13)	12	49932940	49952077	19138	1	23416	uc001ruh.1	-49214	ENSG00000135519	KCNH3	potassium voltage-gated channel subfamily H member 3
chr12	50198774	50199152	379	*	MACS_peak_2005	66.31	Intron (uc009zlk.2/57701, intron 2 of 12)	12	50184929	50191177	6249	2	57701	uc001rvb.2	-7597	ENSG00000167566	NCKAP5L	NCK associated protein 5 like
chr12	50505710	50506388	679	*	MACS_peak_2006	79.05	Promoter (<=1kb)	12	50505764	50514240	8477	1	84987	uc001rwb.2	0	ENSG00000178449	COX14	COX14, cytochrome c oxidase assembly factor
chr12	50589605	50590007	403	*	MACS_peak_2007	56.35	Exon (uc001rwg.4/51474, exon 2 of 5)	12	50569563	50595316	25754	2	51474	uc001rwg.4	5309	ENSG00000050405	LIMA1	LIM domain and actin binding 1
chr12	50636706	50637372	667	*	MACS_peak_2008	57.21	Intron (uc001rwj.4/51474, intron 2 of 10)	12	50627925	50627995	71	2	100302220	uc021qxu.1	-8711	ENSG00000221604	MIR1293	microRNA 1293
chr12	50671191	50671627	437	*	MACS_peak_2009	52.34	Intron (uc001rwj.4/51474, intron 1 of 10)	12	50569563	50677353	107791	2	51474	uc001rwj.4	5726	ENSG00000050405	LIMA1	LIM domain and actin binding 1
chr12	51157559	51158051	493	*	MACS_peak_2010	51.39	Promoter (<=1kb)	12	51157789	51214943	57155	1	466	uc001rww.4	0	ENSG00000123268	ATF1	activating transcription factor 1
chr12	51402927	51403249	323	*	MACS_peak_2011	128.93	Promoter (<=1kb)	12	51379775	51403053	23279	2	4891	uc010smx.2	0	ENSG00000110911	SLC11A2	solute carrier family 11 member 2
chr12	51487764	51488039	276	*	MACS_peak_2012	138.84	3' UTR	12	51454988	51477454	22467	2	81566	uc001rxu.2	-10310	ENSG00000110925	CSRNP2	cysteine and serine rich nuclear protein 2
chr12	51567015	51567486	472	*	MACS_peak_2013	58.71	Promoter (<=1kb)	12	51487539	51566926	79388	2	7024	uc009zlx.2	-89	ENSG00000135457	TFCP2	transcription factor CP2
chr12	51632480	51632767	288	*	MACS_peak_2014	96.75	Promoter (<=1kb)	12	51632508	51637717	5210	1	9802	uc001ryb.3	0	ENSG00000183283	DAZAP2	DAZ associated protein 2
chr12	52403733	52404411	679	*	MACS_peak_2015	77.7	Promoter (<=1kb)	12	52404276	52409673	5398	1	160622	uc001rzp.2	0	ENSG00000161835	GRASP	general receptor for phosphoinositides 1 associated scaffold protein
chr12	52444577	52445441	865	*	MACS_peak_2016	59.41	Promoter (<=1kb)	12	52445186	52449745	4560	1	3164	uc009zmb.2	0	ENSG00000123358	NR4A1	nuclear receptor subfamily 4 group A member 1
chr12	52615656	52616373	718	*	MACS_peak_2017	69.33	Exon (uc010snp.2/283404, exon 4 of 5)	12	52626954	52642709	15756	1	3855	uc001saa.1	-10581	ENSG00000135480	KRT7	keratin 7
chr12	53400106	53400698	593	*	MACS_peak_2020	92.83	Promoter (<=1kb)	12	53400062	53435993	35932	1	1975	uc010snv.2	44	ENSG00000063046	EIF4B	eukaryotic translation initiation factor 4B
chr12	53505655	53506048	394	*	MACS_peak_2021	76.11	Intron (uc001sbv.3/8435, intron 5 of 14)	12	53497274	53518323	21050	1	8435	uc009zms.3	8381	ENSG00000167780	SOAT2	sterol O-acyltransferase 2
chr12	53614131	53614941	811	*	MACS_peak_2022	59.33	Promoter (<=1kb)	12	53604350	53614197	9848	2	5916	uc001scd.3	0	ENSG00000172819	RARG	retinoic acid receptor gamma
chr12	53709905	53710661	757	*	MACS_peak_2023	51.27	Intron (uc001scr.4/8086, intron 2 of 15)	12	53701240	53715412	14173	2	8086	uc001scr.4	4751	ENSG00000094914	AAAS	aladin WD repeat nucleoporin
chr12	53834452	53834970	519	*	MACS_peak_2025	63.93	Promoter (<=1kb)	12	53835433	53861312	25880	1	5094	uc010soh.1	-463	ENSG00000197111	PCBP2	poly(rC) binding protein 2
chr12	53955427	53955843	417	*	MACS_peak_2026	78.05	Intron (uc010sok.1/11016, intron 2 of 12)	12	53907768	53911392	3625	1	100652999	uc001sdx.3	47659	ENSG00000257550	LOC100652999	uncharacterized LOC100652999
chr12	54019352	54019989	638	*	MACS_peak_2027	53.41	Promoter (<=1kb)	12	53936669	54019780	83112	2	11016	uc001sea.4	0	ENSG00000170653	ATF7	activating transcription factor 7
chr12	54332281	54332636	356	*	MACS_peak_2028	127.42	Promoter (<=1kb)	12	54332576	54340328	7753	1	3229	uc001sei.3	0	ENSG00000123364	HOXC13	homeobox C13
chr12	54426483	54426962	480	*	MACS_peak_2029	104.11	Promoter (<=1kb)	12	54426832	54429144	2313	1	3222	uc001sew.3	0	ENSG00000172789	HOXC5	homeobox C5
chr12	54753023	54753747	725	*	MACS_peak_2031	224.95	Downstream (2-3kb)	12	54756229	54758270	2042	2	53831	uc001sfu.3	4523	ENSG00000139572	GPR84	G protein-coupled receptor 84
chr12	56088373	56088850	478	*	MACS_peak_2033	52.15	Promoter (1-2kb)	12	56078354	56090216	11863	2	3679	uc009znw.3	1366	ENSG00000135424	ITGA7	integrin subunit alpha 7
chr12	56109399	56110217	819	*	MACS_peak_2034	90.72	Promoter (<=1kb)	12	56109818	56116442	6625	1	100528022	uc001shj.4	0	NA	BLOC1S1-RDH5	BLOC1S1-RDH5 readthrough
chr12	56111684	56112491	808	*	MACS_peak_2035	51.76	Promoter (1-2kb)	12	56110076	56113491	3416	1	2647	uc021qyv.1	1608	ENSG00000135441	BLOC1S1	biogenesis of lysosomal organelles complex 1 subunit 1
chr12	56121548	56122018	471	*	MACS_peak_2036	136.63	Promoter (<=1kb)	12	56119227	56121572	2346	2	967	uc031qhs.1	0	ENSG00000135404	CD63	CD63 molecule
chr12	56303089	56303415	327	*	MACS_peak_2037	79.27	Intron (uc001sie.1/84305, intron 1 of 2)	12	56295197	56321051	25855	2	84305	uc001sie.1	17636	ENSG00000170473	PYM1	PYM homolog 1, exon junction complex associated factor
chr12	56358896	56359449	554	*	MACS_peak_2038	114.26	Promoter (<=1kb)	12	56347889	56359846	11958	2	6490	uc001siq.3	397	ENSG00000185664	PMEL	premelanosome protein
chr12	56364024	56365113	1090	*	MACS_peak_2039	225.79	Promoter (2-3kb)	12	56367697	56390467	22771	1	5869	uc001siv.3	-2584	ENSG00000111540	RAB5B	RAB5B, member RAS oncogene family
chr12	56435481	56436106	626	*	MACS_peak_2040	50.97	Promoter (<=1kb)	12	56435686	56438007	2322	1	6231	uc001sjf.3	0	ENSG00000197728	RPS26	ribosomal protein S26
chr12	56546103	56546595	493	*	MACS_peak_2041	66.57	Promoter (<=1kb)	12	56546204	56550026	3823	1	140465	uc009zoo.3	0	ENSG00000196465	MYL6B	myosin light chain 6B
chr12	56615867	56616321	455	*	MACS_peak_2042	64.47	Promoter (<=1kb)	12	56596288	56615753	19466	2	10193	uc010sqh.2	-114	ENSG00000181852	RNF41	ring finger protein 41
chr12	56693015	56693604	590	*	MACS_peak_2043	53.7	Promoter (<=1kb)	12	56665483	56694175	28693	2	1431	uc001skr.1	571	ENSG00000062485	CS	citrate synthase
chr12	56708873	56709301	429	*	MACS_peak_2044	57.03	Promoter (<=1kb)	12	56704213	56710128	5916	2	10330	uc001sku.2	827	ENSG00000257727	CNPY2	canopy FGF signaling regulator 2
chr12	56709845	56710305	461	*	MACS_peak_2045	68.97	Promoter (<=1kb)	12	56704213	56710128	5916	2	10330	uc001sku.2	0	ENSG00000257727	CNPY2	canopy FGF signaling regulator 2
chr12	56727553	56728072	520	*	MACS_peak_2046	73.54	Promoter (<=1kb)	12	56710007	56727837	17831	2	9924	uc001sky.3	0	ENSG00000135473	PAN2	PAN2 poly(A) specific ribonuclease subunit
chr12	56862177	56862488	312	*	MACS_peak_2047	63.86	Promoter (<=1kb)	12	56862301	56863623	1323	1	283377	uc010sqo.1	0	ENSG00000176422	SPRYD4	SPRY domain containing 4
chr12	56987522	56988100	579	*	MACS_peak_2048	50.72	3' UTR	12	56989380	56995976	6597	2	11176	uc001slo.1	7876	ENSG00000076108	BAZ2A	bromodomain adjacent to zinc finger domain 2A
chr12	57118634	57119383	750	*	MACS_peak_2049	85.16	Promoter (<=1kb)	12	57106211	57119066	12856	2	4666	uc001sly.2	0	ENSG00000196531	NACA	nascent polypeptide-associated complex alpha subunit
chr12	57472154	57472725	572	*	MACS_peak_2051	56.17	Promoter (<=1kb)	12	57449426	57472574	23149	2	23306	uc001smx.3	0	ENSG00000166881	NEMP1	nuclear envelope integral membrane protein 1
chr12	57505491	57506319	829	*	MACS_peak_2052	147.05	Promoter (<=1kb)	12	57489187	57505196	16010	2	6778	uc010srd.2	-295	ENSG00000166888	STAT6	signal transducer and activator of transcription 6
chr12	57607051	57607456	406	*	MACS_peak_2053	75.78	3' UTR	12	57610578	57620232	9655	1	11247	uc009zpj.4	-3122	ENSG00000182379	NXPH4	neurexophilin 4
chr12	57623417	57624380	964	*	MACS_peak_2054	77.27	Promoter (<=1kb)	12	57623828	57628718	4891	1	6472	uc001sni.2	0	ENSG00000182199	SHMT2	serine hydroxymethyltransferase 2
chr12	57657676	57658202	527	*	MACS_peak_2055	63.38	Intron (uc010srn.1/22864, intron 9 of 14)	12	57637242	57644976	7735	2	246329	uc010srm.1	-12700	ENSG00000185482	STAC3	SH3 and cysteine rich domain 3
chr12	57824606	57825070	465	*	MACS_peak_2056	59.34	Promoter (<=1kb)	12	57647548	57824788	177241	2	22864	uc001sns.2	0	ENSG00000179912	R3HDM2	R3H domain containing 2
chr12	57914286	57914718	433	*	MACS_peak_2057	69.2	Promoter (<=1kb)	12	57910371	57914300	3930	2	1649	uc001soi.3	0	ENSG00000175197	DDIT3	DNA damage inducible transcript 3
chr12	57915730	57916269	540	*	MACS_peak_2058	77.01	Promoter (<=1kb)	12	57916659	57923931	7273	1	114785	uc001soj.1	-390	ENSG00000166987	MBD6	methyl-CpG binding domain protein 6
chr12	58145319	58146712	1394	*	MACS_peak_2059	105.35	Promoter (<=1kb)	12	58141510	58146230	4721	2	1019	uc001spv.3	0	ENSG00000135446	CDK4	cyclin dependent kinase 4
chr12	60045326	60045717	392	*	MACS_peak_2065	91.92	Intron (uc001sqs.4/9194, intron 1 of 5)	12	60083118	60183635	100518	1	9194	uc001squ.4	-37401	ENSG00000118596	SLC16A7	solute carrier family 16 member 7
chr12	62522322	62522778	457	*	MACS_peak_2067	97.45	Intron (uc001sqw.3/338811, intron 1 of 4)	12	62102029	62586620	484592	2	338811	uc001sqw.3	63842	ENSG00000198673	FAM19A2	family with sequence similarity 19 member A2, C-C motif chemokine like
chr12	62996116	62996716	601	*	MACS_peak_2068	71.99	Promoter (<=1kb)	12	62995531	62997214	1684	2	283416	uc001sri.1	498	ENSG00000221949	LINC01465	long intergenic non-protein coding RNA 1465
chr12	63096392	63097304	913	*	MACS_peak_2070	81.35	Intron (uc001srk.3/57460, intron 6 of 9)	12	62997466	62997549	84	1	406891	uc001srj.2	98926	ENSG00000199179	MIRLET7I	microRNA let-7i
chr12	63177745	63178273	529	*	MACS_peak_2071	107.55	Intron (uc001srk.3/57460, intron 4 of 9)	12	63037763	63328665	290903	2	57460	uc001srk.3	150392	ENSG00000111110	PPM1H	protein phosphatase, Mg2+/Mn2+ dependent 1H
chr12	63316054	63316634	581	*	MACS_peak_2072	78.88	Intron (uc001srk.3/57460, intron 1 of 9)	12	63037763	63328665	290903	2	57460	uc001srk.3	12031	ENSG00000111110	PPM1H	protein phosphatase, Mg2+/Mn2+ dependent 1H
chr12	63328784	63329288	505	*	MACS_peak_2073	106.99	Promoter (<=1kb)	12	63037763	63328665	290903	2	57460	uc001srk.3	-119	ENSG00000111110	PPM1H	protein phosphatase, Mg2+/Mn2+ dependent 1H
chr12	64175901	64176707	807	*	MACS_peak_2074	74.97	Promoter (1-2kb)	12	64173906	64203338	29433	1	10329	uc001srs.2	1995	ENSG00000118600	TMEM5	transmembrane protein 5
chr12	64334190	64334812	623	*	MACS_peak_2075	98.35	Intron (uc001srt.3/57522, intron 1 of 9)	12	64377586	64541613	164028	1	57522	uc001srv.2	-42774	ENSG00000196935	SRGAP1	SLIT-ROBO Rho GTPase activating protein 1
chr12	64382869	64383385	517	*	MACS_peak_2076	53.88	Intron (uc001srt.3/57522, intron 2 of 9)	12	64377586	64541613	164028	1	57522	uc001srv.2	5283	ENSG00000196935	SRGAP1	SLIT-ROBO Rho GTPase activating protein 1
chr12	64403998	64404355	358	*	MACS_peak_2077	51.48	Intron (uc001srt.3/57522, intron 3 of 9)	12	64377586	64541613	164028	1	57522	uc001srv.2	26412	ENSG00000196935	SRGAP1	SLIT-ROBO Rho GTPase activating protein 1
chr12	64482068	64482720	653	*	MACS_peak_2078	101.31	Intron (uc010ssp.1/57522, intron 11 of 21)	12	64377586	64541613	164028	1	57522	uc001srv.2	104482	ENSG00000196935	SRGAP1	SLIT-ROBO Rho GTPase activating protein 1
chr12	64615352	64616314	963	*	MACS_peak_2080	58.94	Promoter (<=1kb)	12	64586419	64616076	29658	2	144577	uc001srw.4	0	ENSG00000174206	C12orf66	chromosome 12 open reading frame 66
chr12	64845394	64846045	652	*	MACS_peak_2081	73.02	Promoter (<=1kb)	12	64845840	64895899	50060	1	29110	uc001ssc.2	0	ENSG00000183735	TBK1	TANK binding kinase 1
chr12	65009943	65010328	386	*	MACS_peak_2082	56.63	Intron (uc001ssd.3/283349, intron 1 of 4)	12	65004293	65091347	87055	1	283349	uc009zqn.3	5650	ENSG00000153179	RASSF3	Ras association domain family member 3
chr12	65018622	65020004	1383	*	MACS_peak_2083	186.28	Promoter (2-3kb)	12	65016289	65016385	97	2	100500856	uc021qzv.1	-2237	ENSG00000266016	MIR548Z	microRNA 548z
chr12	65054359	65054910	552	*	MACS_peak_2084	128.2	Intron (uc001ssd.3/283349, intron 1 of 4)	12	65023001	65091347	68347	1	283349	uc001sse.3	31358	ENSG00000153179	RASSF3	Ras association domain family member 3
chr12	65063382	65063736	355	*	MACS_peak_2085	51.48	Intron (uc001ssd.3/283349, intron 1 of 4)	12	65023001	65091347	68347	1	283349	uc001sse.3	40381	ENSG00000153179	RASSF3	Ras association domain family member 3
chr12	65152981	65153498	518	*	MACS_peak_2086	74.58	Promoter (<=1kb)	12	65107222	65153226	46005	2	2799	uc001ssg.4	0	ENSG00000135677	GNS	glucosamine (N-acetyl)-6-sulfatase
chr12	66217814	66218374	561	*	MACS_peak_2093	57.47	Promoter (<=1kb)	12	66218240	66222793	4554	1	8091	uc031qic.1	0	ENSG00000149948	HMGA2	high mobility group AT-hook 2
chr12	66285290	66286251	962	*	MACS_peak_2094	57.97	Intron (uc001ssu.1/8091, intron 3 of 3)	12	66232299	66251298	19000	1	8091	uc001ssy.3	52991	ENSG00000149948	HMGA2	high mobility group AT-hook 2
chr12	66289726	66290429	704	*	MACS_peak_2095	52.04	Intron (uc001ssu.1/8091, intron 3 of 3)	12	66232299	66251298	19000	1	8091	uc001ssy.3	57427	ENSG00000149948	HMGA2	high mobility group AT-hook 2
chr12	66342347	66342831	485	*	MACS_peak_2096	121.19	Intron (uc001ssw.1/8091, intron 3 of 3)	12	66232299	66251298	19000	1	8091	uc001ssy.3	110048	ENSG00000149948	HMGA2	high mobility group AT-hook 2
chr12	66548211	66548852	642	*	MACS_peak_2097	51.06	Intron (uc010ssx.2/84298, intron 1 of 7)	12	66530717	66563807	33091	2	51643	uc001stc.3	14955	ENSG00000155957	TMBIM4	transmembrane BAX inhibitor motif containing 4
chr12	66563107	66563718	612	*	MACS_peak_2098	56.1	Promoter (<=1kb)	12	66530717	66563807	33091	2	51643	uc001stc.3	89	ENSG00000155957	TMBIM4	transmembrane BAX inhibitor motif containing 4
chr12	66695937	66696615	679	*	MACS_peak_2099	56.3	Promoter (<=1kb)	12	66696335	66731992	35658	1	92797	uc009zqt.2	0	ENSG00000127311	HELB	DNA helicase B
chr12	69353384	69354236	853	*	MACS_peak_2105	113.43	Promoter (2-3kb)	12	69244956	69357020	112065	2	1368	uc001sur.3	2784	ENSG00000135678	CPM	carboxypeptidase M
chr12	69753256	69753584	329	*	MACS_peak_2107	58.73	Promoter (<=1kb)	12	69753532	69784576	31045	1	8089	uc001sux.3	0	ENSG00000127337	YEATS4	YEATS domain containing 4
chr12	69928295	69928707	413	*	MACS_peak_2108	50.82	Intron (uc001suy.3/10818, intron 3 of 9)	12	69978503	69978602	100	1	100500868	uc021ran.1	-49796	ENSG00000283677	MIR3913-2	microRNA 3913-2
chr12	70056454	70056846	393	*	MACS_peak_2109	73.24	Intron (uc001svd.2/144453, intron 9 of 9)	12	70047389	70083056	35668	2	144453	uc001svf.3	26210	ENSG00000127325	BEST3	bestrophin 3
chr12	70937232	70937937	706	*	MACS_peak_2111	60.18	Intron (uc001swb.4/5787, intron 20 of 31)	12	70910632	71003624	92993	2	5787	uc001swb.4	65687	ENSG00000127329	PTPRB	protein tyrosine phosphatase, receptor type B
chr12	71039576	71040036	461	*	MACS_peak_2112	53.04	Intron (uc001swf.2/5801, intron 4 of 4)	12	70985514	71031220	45707	2	5787	uc001swe.3	-8356	ENSG00000127329	PTPRB	protein tyrosine phosphatase, receptor type B
chr12	71137773	71138272	500	*	MACS_peak_2113	52.58	Intron (uc001swh.2/5801, intron 2 of 9)	12	71031853	71148388	116536	2	5801	uc001swh.2	10116	ENSG00000153233	PTPRR	protein tyrosine phosphatase, receptor type R
chr12	72233026	72233780	755	*	MACS_peak_2114	170.32	Promoter (<=1kb)	12	72233487	72291721	58235	1	64786	uc009zrv.2	0	ENSG00000121749	TBC1D15	TBC1 domain family member 15
chr12	75599308	75599757	450	*	MACS_peak_2118	111.5	Intron (uc001sxe.4/3747, intron 2 of 5)	12	75433858	75603528	169671	2	3747	uc001sxe.4	3771	ENSG00000166006	KCNC2	potassium voltage-gated channel subfamily C member 2
chr12	76953437	76953863	427	*	MACS_peak_2126	94.2	Promoter (<=1kb)	12	76745578	76953589	208012	2	114882	uc001sye.1	0	ENSG00000091039	OSBPL8	oxysterol binding protein like 8
chr12	77157718	77158068	351	*	MACS_peak_2127	75.35	Promoter (<=1kb)	12	77157854	77216311	58458	1	23390	uc001syi.1	0	ENSG00000186908	ZDHHC17	zinc finger DHHC-type containing 17
chr12	80083077	80083461	385	*	MACS_peak_2133	53.81	Promoter (1-2kb)	12	79985745	80084790	99046	2	5074	uc001syx.3	1329	ENSG00000177425	PAWR	pro-apoptotic WT1 regulator
chr12	80169919	80170252	334	*	MACS_peak_2134	102.78	Intron (uc001syy.3/4659, intron 5 of 5)	12	80167343	80184263	16921	2	4659	uc001syy.3	14011	ENSG00000058272	PPP1R12A	protein phosphatase 1 regulatory subunit 12A
chr12	81697663	81698240	578	*	MACS_peak_2136	144.5	Intron (uc031qih.1/8499, intron 11 of 18)	12	81655728	81734987	79260	2	8499	uc031qit.1	36747	ENSG00000139220	PPFIA2	PTPRF interacting protein alpha 2
chr12	82062050	82062657	608	*	MACS_peak_2137	98.6	Intron (uc031qim.1/8499, intron 2 of 29)	12	81655728	81992150	336423	2	8499	uc031qiv.1	-69900	ENSG00000139220	PPFIA2	PTPRF interacting protein alpha 2
chr12	83255877	83256123	247	*	MACS_peak_2139	112.38	Intron (uc001szr.1/160335, intron 2 of 5)	12	83080934	83528067	447134	1	160335	uc010suk.2	174943	ENSG00000179104	TMTC2	transmembrane and tetratricopeptide repeat containing 2
chr12	83277245	83277528	284	*	MACS_peak_2140	70.61	Intron (uc001szr.1/160335, intron 2 of 5)	12	83080934	83528067	447134	1	160335	uc010suk.2	196311	ENSG00000179104	TMTC2	transmembrane and tetratricopeptide repeat containing 2
chr12	85306079	85307110	1032	*	MACS_peak_2144	75.54	Promoter (<=1kb)	12	85253267	85306608	53342	2	55117	uc001szv.4	0	ENSG00000072041	SLC6A15	solute carrier family 6 member 15
chr12	85673701	85674758	1058	*	MACS_peak_2145	75.06	Promoter (<=1kb)	12	85674036	85695561	21526	1	8092	uc001tae.4	0	ENSG00000180318	ALX1	ALX homeobox 1
chr12	86907583	86908049	467	*	MACS_peak_2147	61.94	Intron (uc001taj.4/25834, intron 2 of 8)	12	86946652	86946729	78	2	100616215	uc021rbp.1	38680	ENSG00000264402	MIR548AL	microRNA 548al
chr12	92423647	92423927	281	*	MACS_peak_2156	85.97	Intron (uc031qiz.1/256021, intron 1 of 5)	12	92378752	92535489	156738	2	256021	uc031qiz.1	111562	ENSG00000257242	LINC01619	long intergenic non-protein coding RNA 1619
chr12	92479111	92479673	563	*	MACS_peak_2157	85.29	Intron (uc031qiz.1/256021, intron 1 of 5)	12	92378752	92535489	156738	2	256021	uc031qiz.1	55816	ENSG00000257242	LINC01619	long intergenic non-protein coding RNA 1619
chr12	92518450	92518929	480	*	MACS_peak_2158	76.46	Intron (uc031qiz.1/256021, intron 1 of 5)	12	92378752	92535489	156738	2	256021	uc031qiz.1	16560	ENSG00000257242	LINC01619	long intergenic non-protein coding RNA 1619
chr12	93496435	93496900	466	*	MACS_peak_2164	67.79	Intron (uc021rbu.1/643339, intron 3 of 4)	12	93166285	93323107	156823	2	8411	uc001tck.3	-173328	ENSG00000102189	EEA1	early endosome antigen 1
chr12	93524747	93525268	522	*	MACS_peak_2165	56.06	Intron (uc021rbu.1/643339, intron 3 of 4)	12	93166285	93323107	156823	2	8411	uc001tck.3	-201640	ENSG00000102189	EEA1	early endosome antigen 1
chr12	93530087	93530947	861	*	MACS_peak_2166	112.43	Intron (uc021rbu.1/643339, intron 3 of 4)	12	93166285	93323107	156823	2	8411	uc001tck.3	-206980	ENSG00000102189	EEA1	early endosome antigen 1
chr12	93567009	93567412	404	*	MACS_peak_2167	67.08	Intron (uc021rbu.1/643339, intron 3 of 4)	12	93397534	93771512	373979	2	643339	uc021rbu.1	204100	NA	LOC643339	uncharacterized LOC643339
chr12	93964190	93964915	726	*	MACS_peak_2168	64.38	Promoter (<=1kb)	12	93964757	93970521	5765	1	8835	uc021rbx.2	0	ENSG00000120833	SOCS2	suppressor of cytokine signaling 2
chr12	94094956	94095349	394	*	MACS_peak_2170	63.86	Intron (uc001tda.3/8738, intron 2 of 2)	12	94071151	94288616	217466	1	8738	uc010sus.1	23805	ENSG00000169372	CRADD	CASP2 and RIPK1 domain containing adaptor with death domain
chr12	94170306	94170739	434	*	MACS_peak_2171	81.71	Intron (uc001tda.3/8738, intron 2 of 2)	12	94071151	94288616	217466	1	8738	uc010sus.1	99155	ENSG00000169372	CRADD	CASP2 and RIPK1 domain containing adaptor with death domain
chr12	94179434	94179839	406	*	MACS_peak_2172	102.12	Intron (uc001tda.3/8738, intron 2 of 2)	12	94071151	94288616	217466	1	8738	uc010sus.1	108283	ENSG00000169372	CRADD	CASP2 and RIPK1 domain containing adaptor with death domain
chr12	94558289	94558624	336	*	MACS_peak_2174	85.14	Intron (uc001tdc.3/10154, intron 1 of 30)	12	94542499	94701451	158953	1	10154	uc001tdc.3	15790	ENSG00000136040	PLXNC1	plexin C1
chr12	94561217	94561724	508	*	MACS_peak_2175	56.74	Intron (uc001tdc.3/10154, intron 1 of 30)	12	94542499	94701451	158953	1	10154	uc001tdc.3	18718	ENSG00000136040	PLXNC1	plexin C1
chr12	94624217	94624858	642	*	MACS_peak_2176	124.86	Intron (uc001tdc.3/10154, intron 9 of 30)	12	94648304	94701451	53148	1	10154	uc010sut.2	-23446	ENSG00000136040	PLXNC1	plexin C1
chr12	94655873	94656556	684	*	MACS_peak_2177	89.57	Promoter (<=1kb)	12	94656297	94701451	45155	1	10154	uc009zsv.3	0	ENSG00000136040	PLXNC1	plexin C1
chr12	95009877	95010570	694	*	MACS_peak_2178	81.24	Promoter (<=1kb)	12	94960900	95009837	48938	2	57458	uc001tdi.2	-40	ENSG00000057704	TMCC3	transmembrane and coiled-coil domain family 3
chr12	95611284	95611811	528	*	MACS_peak_2180	70.29	Promoter (<=1kb)	12	95611522	95663964	52443	1	55591	uc001tdr.2	0	ENSG00000028203	VEZT	vezatin, adherens junctions transmembrane protein
chr12	95706483	95706948	466	*	MACS_peak_2181	50.2	Promoter (2-3kb)	12	95703699	95703760	62	1	100500802	uc001teb.3	2784	ENSG00000265917	MIR3685	microRNA 3685
chr12	96043198	96043498	301	*	MACS_peak_2182	54.68	Promoter (<=1kb)	12	96043031	96067770	24740	1	100132594	uc031qjf.1	167	ENSG00000257150	PGAM1P5	phosphoglycerate mutase 1 pseudogene 5
chr12	96252506	96253208	703	*	MACS_peak_2183	110.97	Promoter (<=1kb)	12	96252709	96260238	7530	1	6636	uc001tej.3	0	ENSG00000139343	SNRPF	small nuclear ribonucleoprotein polypeptide F
chr12	96336603	96337044	442	*	MACS_peak_2184	129.82	Promoter (<=1kb)	12	96337071	96362370	25300	1	144193	uc001tel.2	-27	ENSG00000139344	AMDHD1	amidohydrolase domain containing 1
chr12	96609087	96609405	319	*	MACS_peak_2185	66.25	Intron (uc001teo.1/2004, intron 1 of 4)	12	96588207	96661606	73400	1	2004	uc001teo.1	20880	ENSG00000111145	ELK3	ELK3, ETS transcription factor
chr12	98897253	98898179	927	*	MACS_peak_2191	50.55	Promoter (<=1kb)	12	98879322	98897633	18312	2	643770	uc001tff.2	0	ENSG00000245017	LINC02453	long intergenic non-protein coding RNA 2453
chr12	99276973	99277452	480	*	MACS_peak_2192	110.36	Intron (uc010svd.2/56899, intron 1 of 9)	12	99128569	99288674	160106	2	56899	uc010svd.2	11222	ENSG00000185046	ANKS1B	ankyrin repeat and sterile alpha motif domain containing 1B
chr12	100882872	100883657	786	*	MACS_peak_2193	56.14	Intron (uc001thp.2/9971, intron 1 of 10)	12	100897138	100957645	60508	1	9971	uc001ths.2	-13481	ENSG00000012504	NR1H4	nuclear receptor subfamily 1 group H member 4
chr12	100967069	100967733	665	*	MACS_peak_2194	58.44	Promoter (<=1kb)	12	100967489	101018685	51197	1	283431	uc001thu.3	0	ENSG00000139354	GAS2L3	growth arrest specific 2 like 3
chr12	100987303	100987715	413	*	MACS_peak_2195	62.88	Promoter (<=1kb)	12	100987396	101018685	31290	1	283431	uc001thv.3	0	ENSG00000139354	GAS2L3	growth arrest specific 2 like 3
chr12	101600883	101601502	620	*	MACS_peak_2197	59.19	Promoter (2-3kb)	12	101549994	101604016	54023	2	160728	uc001thz.4	2514	ENSG00000256870	SLC5A8	solute carrier family 5 member 8
chr12	101693672	101694300	629	*	MACS_peak_2198	123.63	Exon (uc001tia.1/27340, exon 14 of 62)	12	101673905	101780397	106493	1	27340	uc001tia.1	19767	ENSG00000120800	UTP20	UTP20, small subunit processome component
chr12	101801439	101802100	662	*	MACS_peak_2199	52.25	Promoter (<=1kb)	12	101786903	101801572	14670	2	400	uc001tib.3	0	ENSG00000120805	ARL1	ADP ribosylation factor like GTPase 1
chr12	102005797	102006370	574	*	MACS_peak_2201	56.74	Intron (uc001tif.2/4604, intron 1 of 14)	12	101988709	102079658	90950	1	4604	uc010svu.2	17088	ENSG00000196091	MYBPC1	myosin binding protein C, slow type
chr12	102217695	102218135	441	*	MACS_peak_2202	81.31	Intron (uc001tit.3/79158, intron 1 of 20)	12	102139275	102224645	85371	2	79158	uc001tit.3	6510	ENSG00000111670	GNPTAB	N-acetylglucosamine-1-phosphate transferase alpha and beta subunits
chr12	102218686	102219275	590	*	MACS_peak_2203	52.04	Intron (uc001tit.3/79158, intron 1 of 20)	12	102139275	102224645	85371	2	79158	uc001tit.3	5370	ENSG00000111670	GNPTAB	N-acetylglucosamine-1-phosphate transferase alpha and beta subunits
chr12	102875848	102876210	363	*	MACS_peak_2205	53.81	Promoter (1-2kb)	12	102811454	102874378	62925	2	3479	uc001tjp.4	-1470	ENSG00000017427	IGF1	insulin like growth factor 1
chr12	103728278	103728949	672	*	MACS_peak_2207	82.66	Intron (uc001tjs.3/374470, intron 4 of 10)	12	103631369	103889746	258378	2	374470	uc001tjs.3	160797	ENSG00000179088	C12orf42	chromosome 12 open reading frame 42
chr12	104159163	104159681	519	*	MACS_peak_2208	58.93	Intron (uc001tjw.3/55576, intron 68 of 68)	12	104106145	104160502	54358	1	55576	uc009zug.3	53018	ENSG00000136011	STAB2	stabilin 2
chr12	104195978	104196484	507	*	MACS_peak_2209	176.9	Intron (uc010swe.1/51559, intron 4 of 13)	12	104166081	104234975	68895	2	51559	uc010swe.1	38491	ENSG00000111696	NT5DC3	5'-nucleotidase domain containing 3
chr12	104252927	104253448	522	*	MACS_peak_2210	120.03	Intron (uc001tjy.4/253724, intron 3 of 4)	12	104237527	104260329	22803	2	253724	uc001tjy.4	6881	ENSG00000214198	TTC41P	tetratricopeptide repeat domain 41, pseudogene
chr12	104350839	104351689	851	*	MACS_peak_2211	109.96	Promoter (<=1kb)	12	104343981	104350993	7013	2	728568	uc009zuj.2	0	ENSG00000204954	C12orf73	chromosome 12 open reading frame 73
chr12	104359385	104359931	547	*	MACS_peak_2212	102.78	Promoter (<=1kb)	12	104359593	104374446	14854	1	6996	uc010swh.1	0	ENSG00000139372	TDG	thymine DNA glycosylase
chr12	104420571	104420956	386	*	MACS_peak_2213	77.72	Intron (uc001tkh.1/83468, intron 1 of 10)	12	104382765	104444066	61302	2	83468	uc001tkh.1	23110	ENSG00000120820	GLT8D2	glycosyltransferase 8 domain containing 2
chr12	104458126	104458428	303	*	MACS_peak_2214	86.71	Promoter (<=1kb)	12	104458236	104500304	42069	1	29915	uc001tkj.4	0	ENSG00000111727	HCFC2	host cell factor C2
chr12	104613520	104614123	604	*	MACS_peak_2215	60.02	Intron (uc001tkm.1/7296, intron 1 of 3)	12	104609557	104744085	134529	1	7296	uc021rcx.2	3963	ENSG00000198431	TXNRD1	thioredoxin reductase 1
chr12	104680394	104681173	780	*	MACS_peak_2216	62.6	Promoter (<=1kb)	12	104680460	104744085	63626	1	7296	uc010swp.3	0	ENSG00000198431	TXNRD1	thioredoxin reductase 1
chr12	104713877	104714356	480	*	MACS_peak_2217	61.16	Intron (uc021rcx.2/7296, intron 9 of 16)	12	104703623	104744085	40463	1	7296	uc009zun.4	10254	ENSG00000198431	TXNRD1	thioredoxin reductase 1
chr12	104892075	104892657	583	*	MACS_peak_2220	88.18	Intron (uc001tky.3/50515, intron 1 of 2)	12	104850692	105155792	305101	1	50515	uc001tkz.3	41383	ENSG00000171310	CHST11	carbohydrate sulfotransferase 11
chr12	104971314	104972134	821	*	MACS_peak_2221	66.96	Intron (uc001tky.3/50515, intron 1 of 2)	12	104985411	104985494	84	1	100500843	uc021rdd.1	-13277	ENSG00000264295	MIR3922	microRNA 3922
chr12	105019945	105020896	952	*	MACS_peak_2222	77.26	Intron (uc001tky.3/50515, intron 2 of 2)	12	104985411	104985494	84	1	100500843	uc021rdd.1	34534	ENSG00000264295	MIR3922	microRNA 3922
chr12	105411830	105412279	450	*	MACS_peak_2223	60.28	Downstream (1-2kb)	12	105380098	105388505	8408	1	121053	uc001tlb.3	31732	ENSG00000151131	C12orf45	chromosome 12 open reading frame 45
chr12	105620036	105620387	352	*	MACS_peak_2224	184.34	Intron (uc010swt.2/55198, intron 2 of 20)	12	105567075	105627183	60109	2	55198	uc010swt.2	6796	ENSG00000136044	APPL2	adaptor protein, phosphotyrosine interacting with PH domain and leucine zipper 2
chr12	106468575	106468894	320	*	MACS_peak_2227	92.79	Intron (uc001tlj.1/9891, intron 4 of 6)	12	106457125	106533811	76687	2	9891	uc001tlj.1	64917	ENSG00000074590	NUAK1	NUAK family kinase 1
chr12	106921206	106921702	497	*	MACS_peak_2229	54.99	Intron (uc021rdg.1/100287944, intron 1 of 3)	12	106976685	107156582	179898	1	5992	uc001tlr.3	-54983	ENSG00000111783	RFX4	regulatory factor X4
chr12	107038559	107039434	876	*	MACS_peak_2230	105.89	Intron (uc001tlr.3/5992, intron 3 of 17)	12	107078477	107156582	78106	1	5992	uc001tlv.3	-39043	ENSG00000111783	RFX4	regulatory factor X4
chr12	107364550	107365219	670	*	MACS_peak_2231	78.24	3' UTR	12	107360863	107367813	6951	1	90488	uc001tmd.3	3687	ENSG00000151135	TMEM263	transmembrane protein 263
chr12	108078581	108079091	511	*	MACS_peak_2232	55.66	Promoter (<=1kb)	12	108079590	108091374	11785	1	11137	uc001tmn.1	-499	ENSG00000136045	PWP1	PWP1 homolog, endonuclein
chr12	108562088	108562375	288	*	MACS_peak_2234	72.73	Intron (uc001tms.3/9671, intron 1 of 8)	12	108525557	108644313	118757	1	9671	uc001tmt.3	36531	ENSG00000075035	WSCD2	WSC domain containing 2
chr12	108622469	108623038	570	*	MACS_peak_2235	97.8	Intron (uc001tms.3/9671, intron 6 of 8)	12	108618516	108644313	25798	1	9671	uc001tmu.3	3953	ENSG00000075035	WSCD2	WSC domain containing 2
chr12	108954615	108954971	357	*	MACS_peak_2236	63.86	Promoter (<=1kb)	12	108915991	108955165	39175	2	9733	uc001tmz.1	194	ENSG00000075856	SART3	squamous cell carcinoma antigen recognized by T-cells 3
chr12	108959818	108960125	308	*	MACS_peak_2237	54.68	Intron (uc010sxa.1/23479, intron 3 of 3)	12	108956294	108963160	6867	1	23479	uc010sxd.2	3524	ENSG00000136003	ISCU	iron-sulfur cluster assembly enzyme
chr12	109083654	109084064	411	*	MACS_peak_2238	98.46	Intron (uc009zva.4/23603, intron 2 of 10)	12	109038885	109096774	57890	2	23603	uc009zva.4	12710	ENSG00000110880	CORO1C	coronin 1C
chr12	109085270	109086015	746	*	MACS_peak_2239	66.58	Intron (uc009zva.4/23603, intron 2 of 10)	12	109038885	109096774	57890	2	23603	uc009zva.4	10759	ENSG00000110880	CORO1C	coronin 1C
chr12	109125374	109125964	591	*	MACS_peak_2240	55.43	Promoter (<=1kb)	12	109038885	109125326	86442	2	23603	uc010sxf.3	-48	ENSG00000110880	CORO1C	coronin 1C
chr12	109219951	109220660	710	*	MACS_peak_2241	132.19	Promoter (<=1kb)	12	109185695	109221327	35633	2	54434	uc010sxg.2	667	ENSG00000084112	SSH1	slingshot protein phosphatase 1
chr12	109226830	109227302	473	*	MACS_peak_2242	87.4	Intron (uc001tnm.3/54434, intron 2 of 14)	12	109185695	109221327	35633	2	54434	uc010sxg.2	-5503	ENSG00000084112	SSH1	slingshot protein phosphatase 1
chr12	109232140	109232514	375	*	MACS_peak_2243	144.22	Intron (uc001tnm.3/54434, intron 2 of 14)	12	109185695	109221327	35633	2	54434	uc010sxg.2	-10813	ENSG00000084112	SSH1	slingshot protein phosphatase 1
chr12	109458663	109459135	473	*	MACS_peak_2244	58.86	Promoter (<=1kb)	12	109304658	109458845	154188	2	55530	uc010sxh.1	0	ENSG00000166111	SVOP	SV2 related protein
chr12	109553347	109553867	521	*	MACS_peak_2245	80.42	Promoter (<=1kb)	12	109554400	109706030	151631	1	32	uc001tob.3	-533	ENSG00000076555	ACACB	acetyl-CoA carboxylase beta
chr12	109742283	109742563	281	*	MACS_peak_2246	73.14	Intron (uc001toe.4/121643, intron 2 of 9)	12	109715783	109747025	31243	2	121643	uc001toe.4	4462	ENSG00000139445	FOXN4	forkhead box N4
chr12	109900938	109901281	344	*	MACS_peak_2247	65.95	Intron (uc009zvi.1/83892, intron 1 of 5)	12	109886460	109896790	10331	2	83892	uc001toh.1	-4148	ENSG00000110906	KCTD10	potassium channel tetramerization domain containing 10
chr12	110164764	110165634	871	*	MACS_peak_2248	126.79	Intron (uc001tpd.2/84915, intron 1 of 2)	12	110152187	110208312	56126	1	84915	uc001tpd.2	12577	ENSG00000139438	FAM222A	family with sequence similarity 222 member A
chr12	110256816	110257180	365	*	MACS_peak_2249	51.48	Intron (uc001tpk.2/59341, intron 1 of 15)	12	110220892	110252696	31805	2	59341	uc001tpj.2	-4120	ENSG00000111199	TRPV4	transient receptor potential cation channel subfamily V member 4
chr12	110337637	110338246	610	*	MACS_peak_2250	81.31	Promoter (<=1kb)	12	110338079	110355874	17796	1	84260	uc001tpn.3	0	ENSG00000139437	TCHP	trichoplein keratin filament binding
chr12	110386853	110387126	274	*	MACS_peak_2251	76.4	Intron (uc001tpo.1/84260, intron 14 of 14)	12	110367607	110434194	66588	2	9815	uc001tpq.2	47068	ENSG00000139436	GIT2	GIT ArfGAP 2
chr12	110511436	110512245	810	*	MACS_peak_2252	53.66	Promoter (<=1kb)	12	110478983	110511439	32457	2	400073	uc001tqe.2	0	ENSG00000174456	C12orf76	chromosome 12 open reading frame 76
chr12	110586972	110587833	862	*	MACS_peak_2255	92.68	Intron (uc001tqg.3/28981, intron 10 of 11)	12	110565165	110656600	91436	1	28981	uc001tqj.3	21807	ENSG00000122970	IFT81	intraflagellar transport 81
chr12	110609517	110609808	292	*	MACS_peak_2256	136.62	Intron (uc001tqh.3/28981, intron 11 of 18)	12	110565165	110656600	91436	1	28981	uc001tqj.3	44352	ENSG00000122970	IFT81	intraflagellar transport 81
chr12	110754450	110755017	568	*	MACS_peak_2257	70.33	Intron (uc001tqk.4/488, intron 5 of 19)	12	110729825	110788897	59073	1	488	uc021rdt.1	24625	ENSG00000174437	ATP2A2	ATPase sarcoplasmic/endoplasmic reticulum Ca2+ transporting 2
chr12	110841259	110841692	434	*	MACS_peak_2258	51.93	Promoter (<=1kb)	12	110810705	110841535	30831	2	51434	uc001tqo.2	0	ENSG00000196510	ANAPC7	anaphase promoting complex subunit 7
chr12	110887213	110887695	483	*	MACS_peak_2259	56.06	Promoter (<=1kb)	12	110872706	110888158	15453	2	10094	uc001tqq.3	463	ENSG00000111229	ARPC3	actin related protein 2/3 complex subunit 3
chr12	110981304	110981855	552	*	MACS_peak_2260	53.76	Intron (uc001trh.1/160760, intron 3 of 5)	12	110972237	111021064	48828	2	160760	uc001trh.1	39209	ENSG00000196850	PPTC7	PTC7 protein phosphatase homolog
chr12	111612807	111613540	734	*	MACS_peak_2262	105.6	Intron (uc001tsa.2/23316, intron 1 of 21)	12	111537321	111733213	195893	1	23316	uc001tsb.2	75486	ENSG00000111249	CUX2	cut like homeobox 2
chr12	111876294	111876552	259	*	MACS_peak_2263	52.33	Intron (uc001tse.3/10019, intron 2 of 7)	12	111872666	111889427	16762	1	10019	uc010syg.2	3628	ENSG00000111252	SH2B3	SH2B adaptor protein 3
chr12	112037239	112037700	462	*	MACS_peak_2264	57.06	Promoter (<=1kb)	12	111890018	112037477	147460	2	6311	uc001tsh.3	0	ENSG00000204842	ATXN2	ataxin 2
chr12	112279513	112280152	640	*	MACS_peak_2265	50.36	Promoter (<=1kb)	12	112277573	112279710	2138	2	51275	uc001tsv.2	0	ENSG00000234608	MAPKAPK5-AS1	MAPKAPK5 antisense RNA 1
chr12	112450782	112451430	649	*	MACS_peak_2266	91.08	Promoter (<=1kb)	12	112451152	112461024	9873	1	10961	uc001ttk.1	0	ENSG00000089248	ERP29	endoplasmic reticulum protein 29
chr12	112535930	112536133	204	*	MACS_peak_2267	111.18	Intron (uc001ttm.3/80018, intron 1 of 23)	12	112464493	112546635	82143	2	80018	uc001ttm.3	10502	ENSG00000111300	NAA25	N(alpha)-acetyltransferase 25, NatB auxiliary subunit
chr12	112576660	112576863	204	*	MACS_peak_2268	99.16	Intron (uc009zwb.2/10906, intron 4 of 4)	12	112563349	112591408	28060	1	10906	uc001ttp.3	13311	ENSG00000135148	TRAFD1	TRAF-type zinc finger domain containing 1
chr12	112892701	112893220	520	*	MACS_peak_2269	53.72	Intron (uc001ttw.1/5781, intron 5 of 10)	12	112856536	112947717	91182	1	5781	uc001ttx.3	36165	ENSG00000179295	PTPN11	protein tyrosine phosphatase, non-receptor type 11
chr12	113015608	113016092	485	*	MACS_peak_2270	79.02	Promoter (2-3kb)	12	113012901	113336684	323784	1	22895	uc010syl.2	2707	ENSG00000089169	RPH3A	rabphilin 3A
chr12	113037591	113038050	460	*	MACS_peak_2271	53.09	Intron (uc010syl.2/22895, intron 1 of 21)	12	113012901	113336684	323784	1	22895	uc010syl.2	24690	ENSG00000089169	RPH3A	rabphilin 3A
chr12	113188569	113189480	912	*	MACS_peak_2272	62.86	Intron (uc010syl.2/22895, intron 1 of 21)	12	113229549	113336684	107136	1	22895	uc001tty.3	-40069	ENSG00000089169	RPH3A	rabphilin 3A
chr12	113622346	113623519	1174	*	MACS_peak_2274	70.32	Promoter (<=1kb)	12	113594978	113623284	28307	2	79039	uc001tup.3	0	ENSG00000123064	DDX54	DEAD-box helicase 54
chr12	113652652	113653107	456	*	MACS_peak_2275	62.62	Intron (uc001tuu.3/115811, intron 1 of 2)	12	113633246	113658880	25635	2	115811	uc001tuu.3	5773	ENSG00000166578	IQCD	IQ motif containing D
chr12	114210940	114211804	865	*	MACS_peak_2277	71.53	Exon (uc001tvk.1/uc001tvk.1, exon 1 of 2)	12	114254543	114404176	149634	2	9904	uc009zwi.2	192372	ENSG00000122965	RBM19	RNA binding motif protein 19
chr12	114403676	114404573	898	*	MACS_peak_2278	57.95	Promoter (<=1kb)	12	114254543	114404176	149634	2	9904	uc009zwi.2	0	ENSG00000122965	RBM19	RNA binding motif protein 19
chr12	116528371	116528807	437	*	MACS_peak_2287	51.76	Intron (uc001tvw.3/23389, intron 4 of 30)	12	116586365	116586459	95	2	693205	uc021reh.1	57652	ENSG00000207967	MIR620	microRNA 620
chr12	116997110	116997653	544	*	MACS_peak_2291	100.66	Promoter (<=1kb)	12	116997186	117014425	17240	1	643246	uc009zwk.1	0	ENSG00000258102	MAP1LC3B2	microtubule associated protein 1 light chain 3 beta 2
chr12	117301234	117301646	413	*	MACS_peak_2293	59.21	Intron (uc001twe.4/8739, intron 1 of 1)	12	117298225	117319232	21008	2	8739	uc001twe.4	17586	ENSG00000135116	HRK	harakiri, BCL2 interacting protein
chr12	118359222	118359611	390	*	MACS_peak_2295	63.51	Intron (uc001two.2/283455, intron 1 of 19)	12	117890817	118406028	515212	2	283455	uc001two.2	46417	ENSG00000171435	KSR2	kinase suppressor of ras 2
chr12	118573423	118574127	705	*	MACS_peak_2296	51.22	Promoter (<=1kb)	12	118573870	118583387	9518	1	5037	uc010szc.1	0	ENSG00000089220	PEBP1	phosphatidylethanolamine binding protein 1
chr12	118794815	118795493	679	*	MACS_peak_2297	88.75	Promoter (1-2kb)	12	118587606	118797412	209807	2	51347	uc001twx.3	1919	ENSG00000135090	TAOK3	TAO kinase 3
chr12	120107367	120107679	313	*	MACS_peak_2301	61.01	Promoter (1-2kb)	12	120105761	120119429	13669	1	5564	uc001txg.3	1606	ENSG00000111725	PRKAB1	protein kinase AMP-activated non-catalytic subunit beta 1
chr12	120306722	120307383	662	*	MACS_peak_2302	163.84	Exon (uc001txi.2/11113, exon 3 of 47)	12	120123595	120315095	191501	2	11113	uc001txi.2	7712	ENSG00000122966	CIT	citron rho-interacting serine/threonine kinase
chr12	120632321	120632905	585	*	MACS_peak_2303	59.68	Promoter (<=1kb)	12	120565014	120632513	67500	2	10985	uc001txo.3	0	ENSG00000089154	GCN1	GCN1, eIF2 alpha kinase activator homolog
chr12	120658567	120659362	796	*	MACS_peak_2304	108.64	Intron (uc031qjr.1/5829, intron 6 of 11)	12	120648242	120654919	6678	2	5829	uc001txu.3	-3648	ENSG00000089159	PXN	paxillin
chr12	120951909	120952477	569	*	MACS_peak_2307	50.77	Intron (uc001tyn.3/84274, intron 3 of 6)	12	120941082	120966964	25883	2	84274	uc001tyn.3	14487	ENSG00000110871	COQ5	coenzyme Q5, methyltransferase
chr12	121341178	121341457	280	*	MACS_peak_2308	65.95	Promoter (<=1kb)	12	121200313	121342155	141843	2	121665	uc001tzd.3	698	ENSG00000157837	SPPL3	signal peptide peptidase like 3
chr12	121566612	121567726	1115	*	MACS_peak_2310	195.53	Promoter (2-3kb)	12	121570622	121624354	53733	1	5027	uc001tzm.3	-2896	ENSG00000089041	P2RX7	purinergic receptor P2X 7
chr12	121651814	121652566	753	*	MACS_peak_2311	69.78	Intron (uc010szr.1/5025, intron 1 of 8)	12	121647664	121671909	24246	1	5025	uc031qju.1	4150	ENSG00000135124	P2RX4	purinergic receptor P2X 4
chr12	121783046	121783405	360	*	MACS_peak_2312	51.48	Intron (uc001uag.3/51433, intron 4 of 16)	12	121746048	121790265	44218	2	51433	uc001uag.3	6860	ENSG00000089053	ANAPC5	anaphase promoting complex subunit 5
chr12	122191696	122192363	668	*	MACS_peak_2313	84.71	Intron (uc001ubc.4/144404, intron 5 of 11)	12	122215660	122231594	15935	2	54509	uc001ubb.3	39231	ENSG00000139725	RHOF	ras homolog family member F, filopodia associated
chr12	122362468	122362949	482	*	MACS_peak_2314	61.04	Intron (uc021rfh.1/144406, intron 3 of 17)	12	122356463	122441832	85370	1	144406	uc009zxk.3	6005	ENSG00000158023	WDR66	WD repeat domain 66
chr12	122412581	122413251	671	*	MACS_peak_2315	59.44	Exon (uc009zxk.3/144406, exon 18 of 22)	12	122459861	122499950	40090	1	605	uc001ubo.3	-46610	ENSG00000110987	BCL7A	BCL tumor suppressor 7A
chr12	122582970	122583495	526	*	MACS_peak_2316	122.95	Intron (uc001ubq.3/22877, intron 1 of 16)	12	122612430	122618711	6282	1	22877	uc001ubr.3	-28935	ENSG00000175727	MLXIP	MLX interacting protein
chr12	122750891	122751511	621	*	MACS_peak_2317	62	Promoter (<=1kb)	12	122692209	122751068	58860	2	65082	uc001ucc.3	0	ENSG00000139719	VPS33A	VPS33A, CORVET/HOPS core subunit
chr12	122884906	122885371	466	*	MACS_peak_2318	61.18	Intron (uc001ucg.2/6249, intron 1 of 25)	12	122880089	122884491	4403	1	100507066	uc021rfk.1	4817	NA	CLIP1-AS1	CLIP1 antisense RNA 1
chr12	122985623	122985998	376	*	MACS_peak_2320	67.26	Promoter (<=1kb)	12	122956146	122985543	29398	2	55596	uc001ucn.3	-80	ENSG00000033030	ZCCHC8	zinc finger CCHC-type containing 8
chr12	123236923	123237375	453	*	MACS_peak_2321	71	Promoter (<=1kb)	12	123237371	123255953	18583	1	8562	uc001uda.3	0	ENSG00000139726	DENR	density regulated re-initiation and release factor
chr12	123356225	123357273	1049	*	MACS_peak_2322	81.33	Intron (uc001udl.3/79720, intron 1 of 3)	12	123340473	123346061	5589	1	9026	uc001udk.1	15752	ENSG00000130787	HIP1R	huntingtin interacting protein 1 related
chr12	123369050	123369720	671	*	MACS_peak_2323	82.73	Intron (uc001udl.3/79720, intron 1 of 3)	12	123349875	123380712	30838	2	79720	uc001udl.3	10992	ENSG00000139722	VPS37B	VPS37B, ESCRT-I subunit
chr12	123431123	123432040	918	*	MACS_peak_2324	195.07	Promoter (1-2kb)	12	123413539	123429186	15648	2	23457	uc010tai.2	-1937	ENSG00000150967	ABCB9	ATP binding cassette subfamily B member 9
chr12	123579333	123579623	291	*	MACS_peak_2325	76.28	Intron (uc001uej.1/57605, intron 1 of 24)	12	123484853	123590046	105194	2	57605	uc009zxu.1	10423	ENSG00000090975	PITPNM2	phosphatidylinositol transfer protein membrane associated 2
chr12	123754089	123754721	633	*	MACS_peak_2326	67.8	Promoter (<=1kb)	12	123745517	123754781	9265	2	8099	uc031qjz.1	60	ENSG00000111328	CDK2AP1	cyclin dependent kinase 2 associated protein 1
chr12	123849339	123849933	595	*	MACS_peak_2327	101.34	Promoter (<=1kb)	12	123805246	123849388	44143	2	55206	uc001uet.2	0	ENSG00000139697	SBNO1	strawberry notch homolog 1
chr12	123963856	123964647	792	*	MACS_peak_2328	83.37	Intron (uc001ufd.2/353116, intron 6 of 6)	12	123944386	123950941	6556	1	11066	uc021rfv.1	19470	ENSG00000184209	SNRNP35	small nuclear ribonucleoprotein U11/U12 subunit 35
chr12	124086587	124086917	331	*	MACS_peak_2329	65.95	Promoter (<=1kb)	12	124086672	124104255	17584	1	57696	uc001ufh.3	0	ENSG00000111364	DDX55	DEAD-box helicase 55
chr12	124118062	124118558	497	*	MACS_peak_2330	57.38	Promoter (<=1kb)	12	124105570	124118323	12754	2	1967	uc001ufm.3	0	ENSG00000111361	EIF2B1	eukaryotic translation initiation factor 2B subunit alpha
chr12	124558100	124558564	465	*	MACS_peak_2331	65.87	Intron (uc021rfy.1/100533183, intron 2 of 4)	12	124457762	124499986	42225	1	144348	uc001ugb.3	100338	ENSG00000179195	ZNF664	zinc finger protein 664
chr12	124583470	124583993	524	*	MACS_peak_2332	61.66	Intron (uc021rfy.1/100533183, intron 2 of 4)	12	124457762	124499986	42225	1	144348	uc001ugb.3	125708	ENSG00000179195	ZNF664	zinc finger protein 664
chr12	124837317	124837760	444	*	MACS_peak_2333	109.85	Intron (uc010tbb.2/9612, intron 29 of 48)	12	124808957	124824750	15794	2	9612	uc010tax.2	-12567	ENSG00000196498	NCOR2	nuclear receptor corepressor 2
chr12	124881239	124881950	712	*	MACS_peak_2334	100.39	Intron (uc010tbb.2/9612, intron 18 of 48)	12	124808957	124824750	15794	2	9612	uc010tax.2	-56489	ENSG00000196498	NCOR2	nuclear receptor corepressor 2
chr12	124941943	124942360	418	*	MACS_peak_2335	88.34	Intron (uc010tbb.2/9612, intron 7 of 48)	12	124824552	124979914	155363	2	9612	uc010tba.2	37554	ENSG00000196498	NCOR2	nuclear receptor corepressor 2
chr12	125332029	125332700	672	*	MACS_peak_2338	52.86	Intron (uc001ugm.4/949, intron 1 of 12)	12	125262174	125348519	86346	2	949	uc001ugm.4	15819	ENSG00000073060	SCARB1	scavenger receptor class B member 1
chr12	125401619	125402030	412	*	MACS_peak_2340	93.87	Promoter (1-2kb)	12	125400093	125400205	113	1	100847004	uc031qkf.1	1526	ENSG00000265345	MIR5188	microRNA 5188
chr12	125500475	125500891	417	*	MACS_peak_2341	50.16	Intron (uc001uha.1/140707, intron 2 of 2)	12	125478194	125510349	32156	1	140707	uc001uha.1	22281	ENSG00000184992	BRI3BP	BRI3 binding protein
chr12	125993853	125994498	646	*	MACS_peak_2342	75.19	Intron (uc001uhe.1/114795, intron 3 of 8)	12	126107042	126143589	36548	1	114795	uc001uhf.1	-112544	ENSG00000139364	TMEM132B	transmembrane protein 132B
chr12	126012676	126013137	462	*	MACS_peak_2343	88.12	Intron (uc001uhe.1/114795, intron 4 of 8)	12	126107042	126143589	36548	1	114795	uc001uhf.1	-93905	ENSG00000139364	TMEM132B	transmembrane protein 132B
chr12	129305196	129305846	651	*	MACS_peak_2350	53.96	Promoter (2-3kb)	12	129277739	129308541	30803	2	121260	uc001uhu.2	2695	ENSG00000139370	SLC15A4	solute carrier family 15 member 4
chr12	129354297	129354551	255	*	MACS_peak_2351	92.78	Intron (uc001uhx.1/144423, intron 1 of 7)	12	129348681	129469509	120829	1	144423	uc010tbh.1	5616	ENSG00000151948	GLT1D1	glycosyltransferase 1 domain containing 1
chr12	129467802	129468612	811	*	MACS_peak_2352	97.49	3' UTR	12	129556271	129570545	14275	2	121256	uc001uia.2	101933	ENSG00000151952	TMEM132D	transmembrane protein 132D
chr12	130144545	130144909	365	*	MACS_peak_2353	53.81	Intron (uc009zyl.1/121256, intron 2 of 8)	12	129556271	130388212	831942	2	121256	uc009zyl.1	243303	ENSG00000151952	TMEM132D	transmembrane protein 132D
chr12	130160998	130161331	334	*	MACS_peak_2354	89.94	Intron (uc009zyl.1/121256, intron 2 of 8)	12	129556271	130388212	831942	2	121256	uc009zyl.1	226881	ENSG00000151952	TMEM132D	transmembrane protein 132D
chr12	131468139	131468908	770	*	MACS_peak_2357	69.49	Intron (uc001uit.4/283383, intron 5 of 24)	12	131438452	131626008	187557	1	283383	uc010tbm.2	29687	ENSG00000111452	ADGRD1	adhesion G protein-coupled receptor D1
chr12	132195412	132196006	595	*	MACS_peak_2360	58.04	Promoter (<=1kb)	12	132195632	132239044	43413	1	6433	uc001uiz.2	0	ENSG00000061936	SFSWAP	splicing factor SWAP
chr12	132268534	132269491	958	*	MACS_peak_2361	68.05	Intron (uc001uja.2/6433, intron 14 of 17)	12	132312941	132336316	23376	1	4326	uc001ujc.1	-43450	ENSG00000198598	MMP17	matrix metallopeptidase 17
chr12	133343984	133344226	243	*	MACS_peak_2363	101.19	Downstream (1-2kb)	12	133302254	133338451	36198	2	23141	uc001ukx.2	-5533	ENSG00000176915	ANKLE2	ankyrin repeat and LEM domain containing 2
chr12	133360535	133361451	917	*	MACS_peak_2364	143.89	3' UTR	12	133302254	133338451	36198	2	23141	uc001ukx.2	-22084	ENSG00000176915	ANKLE2	ankyrin repeat and LEM domain containing 2
chr12	133404546	133405172	627	*	MACS_peak_2365	64.69	Promoter (<=1kb)	12	133345495	133405288	59794	2	2802	uc001ukz.1	116	ENSG00000090615	GOLGA3	golgin A3
chr12	133464347	133464988	642	*	MACS_peak_2366	58.08	Promoter (<=1kb)	12	133416938	133464204	47267	2	55743	uc010tbt.1	-143	ENSG00000072609	CHFR	checkpoint with forkhead and ring finger domains
chr12	133613812	133614236	425	*	MACS_peak_2367	82.56	Promoter (<=1kb)	12	133613878	133639885	26008	1	7637	uc001ulm.4	0	ENSG00000198040	ZNF84	zinc finger protein 84
chr12	133706656	133707280	625	*	MACS_peak_2368	72.09	Promoter (<=1kb)	12	133696555	133707059	10505	2	101060200	uc031qkm.1	0	ENSG00000214029	ZNF891	zinc finger protein 891
chr13	20994135	20994558	424	*	MACS_peak_2372	71.18	Intron (uc001une.3/51084, intron 5 of 7)	13	21007917	21007985	69	2	100616304	uc021rhc.1	13427	ENSG00000263978	MIR4499	microRNA 4499
chr13	21015789	21016511	723	*	MACS_peak_2373	88.3	Promoter (1-2kb)	13	21005757	21014043	8287	2	51084	uc010tcp.1	-1746	ENSG00000165475	CRYL1	crystallin lambda 1
chr13	21061168	21061385	218	*	MACS_peak_2374	87.3	Intron (uc001une.3/51084, intron 3 of 7)	13	20977806	21100012	122207	2	51084	uc001une.3	38627	ENSG00000165475	CRYL1	crystallin lambda 1
chr13	21456974	21457393	420	*	MACS_peak_2376	55.34	Intron (uc001unq.4/64328, intron 1 of 22)	13	21351468	21476913	125446	2	64328	uc001unq.4	19520	ENSG00000132953	XPO4	exportin 4
chr13	21585312	21585820	509	*	MACS_peak_2377	50.61	Intron (uc009zzs.3/26524, intron 2 of 7)	13	21547176	21634429	87254	2	26524	uc009zzs.3	48609	ENSG00000150457	LATS2	large tumor suppressor kinase 2
chr13	21912741	21913153	413	*	MACS_peak_2378	55.74	Intron (uc031qkq.1/650794, intron 2 of 4)	13	21872264	21967061	94798	1	650794	uc031qkq.1	40477	NA	MIPEPP3	mitochondrial intermediate peptidase pseudogene 3
chr13	21973947	21974256	310	*	MACS_peak_2379	63.51	Intron (uc001uoa.2/253832, intron 7 of 11)	13	21946710	22033508	86799	2	253832	uc001uoa.2	59252	ENSG00000180776	ZDHHC20	zinc finger DHHC-type containing 20
chr13	23998932	23999597	666	*	MACS_peak_2380	70.61	Intron (uc001uor.2/100506680, intron 1 of 1)	13	23993110	24003008	9899	1	100506680	uc001uor.2	5822	ENSG00000229558	SACS-AS1	SACS antisense RNA 1
chr13	24044749	24045781	1033	*	MACS_peak_2381	64.19	Promoter (1-2kb)	13	24043651	24061603	17953	1	100506697	uc001uos.3	1098	ENSG00000232977	LINC00327	long intergenic non-protein coding RNA 327
chr13	24144275	24144738	464	*	MACS_peak_2383	74.99	Promoter (<=1kb)	13	24144509	24250244	105736	1	55504	uc001uot.3	0	ENSG00000127863	TNFRSF19	TNF receptor superfamily member 19
chr13	24366844	24367321	478	*	MACS_peak_2385	73.54	Intron (uc001uox.4/4285, intron 16 of 18)	13	24463028	24466242	3215	1	542767	uc001uoy.3	-95707	ENSG00000205861	PCOTH	Pro-X-Gly collagen triple helix like repeat containing
chr13	24722855	24723346	492	*	MACS_peak_2386	57.74	Intron (uc001upd.3/221178, intron 3 of 14)	13	24734861	24798936	64076	1	221178	uc001upf.2	-11515	ENSG00000182957	SPATA13	spermatogenesis associated 13
chr13	26479680	26480170	491	*	MACS_peak_2387	55.34	Intron (uc001uqk.3/51761, intron 33 of 36)	13	26618735	26625198	6464	2	387914	uc001uqm.1	145028	ENSG00000180730	SHISA2	shisa family member 2
chr13	29233002	29233582	581	*	MACS_peak_2396	58.71	Promoter (<=1kb)	13	29233141	29253093	19953	1	51371	uc001usf.3	0	ENSG00000132963	POMP	proteasome maturation protein
chr13	30151810	30152230	421	*	MACS_peak_2399	52.68	Intron (uc001uso.3/6541, intron 1 of 12)	13	30083551	30169825	86275	2	6541	uc001uso.3	17595	ENSG00000139514	SLC7A1	solute carrier family 7 member 1
chr13	30161811	30162238	428	*	MACS_peak_2400	121.11	Intron (uc001uso.3/6541, intron 1 of 12)	13	30083551	30169825	86275	2	6541	uc001uso.3	7587	ENSG00000139514	SLC7A1	solute carrier family 7 member 1
chr13	30425291	30425581	291	*	MACS_peak_2402	54.68	Promoter (<=1kb)	13	30338545	30424820	86276	2	5412	uc001usp.3	-471	ENSG00000122042	UBL3	ubiquitin like 3
chr13	30458702	30459349	648	*	MACS_peak_2403	56.1	Intron (uc031qkw.1/100874059, intron 1 of 1)	13	30446750	30462542	15793	2	100874059	uc031qkw.1	3193	ENSG00000224329	LINC00297	long intergenic non-protein coding RNA 297
chr13	31141295	31141499	205	*	MACS_peak_2406	102.78	Intron (uc001usz.3/3146, intron 1 of 4)	13	31032879	31191510	158632	2	3146	uc001usz.3	50011	ENSG00000189403	HMGB1	high mobility group box 1
chr13	31191018	31191835	818	*	MACS_peak_2407	54.57	Promoter (<=1kb)	13	31191830	31226094	34265	1	10208	uc001utb.3	0	ENSG00000132952	USPL1	ubiquitin specific peptidase like 1
chr13	31379538	31380257	720	*	MACS_peak_2408	76.12	Promoter (2-3kb)	13	31377343	31384782	7440	1	100874158	uc031qkx.1	2195	ENSG00000237879	LINC00398	long intergenic non-protein coding RNA 398
chr13	32444379	32445048	670	*	MACS_peak_2411	73.86	Intron (uc001utu.3/196549, intron 1 of 3)	13	32420920	32533721	112802	1	196549	uc010tdv.2	23459	NA	EEF1DP3	eukaryotic translation elongation factor 1 delta pseudogene 3
chr13	32739885	32740335	451	*	MACS_peak_2412	88.05	Intron (uc001utx.3/10129, intron 17 of 60)	13	32835753	32870776	35024	1	10129	uc001utz.3	-95418	ENSG00000073910	FRY	FRY microtubule binding protein
chr13	33700340	33700776	437	*	MACS_peak_2413	66.88	Exon (uc001uuu.3/90627, exon 7 of 14)	13	33677272	33760216	82945	2	90627	uc001uuu.3	59440	ENSG00000133121	STARD13	StAR related lipid transfer domain containing 13
chr13	33714358	33714640	283	*	MACS_peak_2414	128.93	Intron (uc001uuu.3/90627, intron 4 of 13)	13	33677272	33760216	82945	2	90627	uc001uuu.3	45576	ENSG00000133121	STARD13	StAR related lipid transfer domain containing 13
chr13	33803661	33804591	931	*	MACS_peak_2415	129.77	Intron (uc001uuw.3/90627, intron 1 of 13)	13	33691685	33780187	88503	2	90627	uc021ria.1	-23474	ENSG00000133121	STARD13	StAR related lipid transfer domain containing 13
chr13	33835643	33836278	636	*	MACS_peak_2416	87.06	Intron (uc001uuw.3/90627, intron 1 of 13)	13	33851691	33855471	3781	1	100874241	uc031qlc.1	-15413	ENSG00000236581	STARD13-AS	STARD13 antisense RNA
chr13	33859663	33860072	410	*	MACS_peak_2417	60.45	Promoter (<=1kb)	13	33677272	33859901	182630	2	90627	uc001uuw.3	0	ENSG00000133121	STARD13	StAR related lipid transfer domain containing 13
chr13	33902673	33903155	483	*	MACS_peak_2418	118.34	Intron (uc001uux.3/90627, intron 5 of 17)	13	33701510	33924767	223258	2	90627	uc010abh.1	21612	ENSG00000133121	STARD13	StAR related lipid transfer domain containing 13
chr13	34020595	34021474	880	*	MACS_peak_2419	87.84	Intron (uc001uux.3/90627, intron 4 of 17)	13	33701510	33924767	223258	2	90627	uc010abh.1	-95828	ENSG00000133121	STARD13	StAR related lipid transfer domain containing 13
chr13	34207667	34208412	746	*	MACS_peak_2420	121.36	Intron (uc001uux.3/90627, intron 3 of 17)	13	33677272	34250932	573661	2	90627	uc001uux.3	42520	ENSG00000133121	STARD13	StAR related lipid transfer domain containing 13
chr13	35130261	35130561	301	*	MACS_peak_2423	126.02	Intron (uc031qld.1/100874179, intron 1 of 2)	13	35009591	35214822	205232	2	100874179	uc031qld.1	84261	ENSG00000225179	LINC00457	long intergenic non-protein coding RNA 457
chr13	35713621	35713971	351	*	MACS_peak_2425	56.41	Intron (uc021ric.1/26960, intron 17 of 56)	13	35735887	36246874	510988	1	26960	uc010abi.3	-21916	ENSG00000172915	NBEA	neurobeachin
chr13	36676903	36677441	539	*	MACS_peak_2426	60.85	Intron (uc001uvf.3/9201, intron 3 of 17)	13	36342789	36705514	362726	2	9201	uc001uvf.3	28073	ENSG00000133083	DCLK1	doublecortin like kinase 1
chr13	36920008	36920811	804	*	MACS_peak_2427	70.82	Promoter (<=1kb)	13	36920568	36943872	23305	1	100507135	uc021rig.1	0	ENSG00000120664	SPART-AS1	SPART antisense RNA 1
chr13	39396003	39396604	602	*	MACS_peak_2431	99.09	Intron (uc001uwv.3/341640, intron 6 of 23)	13	39343715	39439063	95349	1	341640	uc001uww.3	52288	ENSG00000150893	FREM2	FRAS1 related extracellular matrix protein 2
chr13	39612129	39612996	868	*	MACS_peak_2432	61.12	Promoter (<=1kb)	13	39612448	39624244	11797	1	387921	uc001uxc.4	0	ENSG00000188811	NHLRC3	NHL repeat containing 3
chr13	39969142	39969607	466	*	MACS_peak_2433	58.97	Intron (uc001uxf.3/10186, intron 2 of 3)	13	39917029	40177356	260328	2	10186	uc001uxf.3	207749	ENSG00000183722	LHFPL6	LHFPL tetraspan subfamily member 6
chr13	40953389	40953872	484	*	MACS_peak_2436	58.2	Intron (uc001uxj.4/646982, intron 5 of 5)	13	40921271	41055143	133873	2	646982	uc001uxj.4	101271	ENSG00000215483	LINC00598	long intergenic non-protein coding RNA 598
chr13	40977102	40977731	630	*	MACS_peak_2437	51.65	Intron (uc001uxj.4/646982, intron 5 of 5)	13	40921271	41055143	133873	2	646982	uc001uxj.4	77412	ENSG00000215483	LINC00598	long intergenic non-protein coding RNA 598
chr13	41121815	41122457	643	*	MACS_peak_2438	52.88	Intron (uc010acc.1/2308, intron 2 of 2)	13	41048131	41185264	137134	2	2308	uc010acc.1	62807	ENSG00000150907	FOXO1	forkhead box O1
chr13	41635160	41636191	1032	*	MACS_peak_2439	60.23	Promoter (<=1kb)	13	41635697	41658139	22443	1	11193	uc001uxt.3	0	ENSG00000120688	WBP4	WW domain binding protein 4
chr13	42614421	42614887	467	*	MACS_peak_2440	52.42	Promoter (<=1kb)	13	42614172	42803891	189720	1	160851	uc010tfh.2	249	ENSG00000102780	DGKH	diacylglycerol kinase eta
chr13	42845627	42846148	522	*	MACS_peak_2441	91.95	Promoter (<=1kb)	13	42846289	42897403	51115	1	11215	uc001uys.2	-141	ENSG00000023516	AKAP11	A-kinase anchoring protein 11
chr13	42881636	42882114	479	*	MACS_peak_2442	54.99	Intron (uc001uys.2/11215, intron 8 of 12)	13	42846289	42897403	51115	1	11215	uc001uys.2	35347	ENSG00000023516	AKAP11	A-kinase anchoring protein 11
chr13	43985367	43985816	450	*	MACS_peak_2444	57.8	Intron (uc001uza.4/55068, intron 5 of 16)	13	43894987	43935213	40227	2	55068	uc010tfm.1	-50154	ENSG00000120658	ENOX1	ecto-NOX disulfide-thiol exchanger 1
chr13	44058953	44059331	379	*	MACS_peak_2445	73.24	Intron (uc001uza.4/55068, intron 2 of 16)	13	43894987	43935213	40227	2	55068	uc010tfm.1	-123740	ENSG00000120658	ENOX1	ecto-NOX disulfide-thiol exchanger 1
chr13	45003525	45004071	547	*	MACS_peak_2448	54.05	Downstream (2-3kb)	13	45006279	45011060	4782	2	8848	uc001uzm.4	6989	ENSG00000102804	TSC22D1	TSC22 domain family member 1
chr13	45016973	45017414	442	*	MACS_peak_2449	63.52	Intron (uc021rja.1/8848, intron 1 of 2)	13	45006279	45011390	5112	2	8848	uc021riz.1	-5583	ENSG00000102804	TSC22D1	TSC22 domain family member 1
chr13	45151697	45152594	898	*	MACS_peak_2450	55.14	Promoter (<=1kb)	13	45006279	45150701	144423	2	8848	uc001uzo.2	-996	ENSG00000102804	TSC22D1	TSC22 domain family member 1
chr13	45563364	45563777	414	*	MACS_peak_2455	94.62	Promoter (<=1kb)	13	45513384	45563613	50230	2	26747	uc001uzp.2	0	ENSG00000083635	NUFIP1	NUFIP1, FMR1 interacting protein 1
chr13	45716631	45717303	673	*	MACS_peak_2456	56.89	Intron (uc001uzw.3/2963, intron 2 of 7)	13	45694631	45858239	163609	1	2963	uc001uzw.3	22000	ENSG00000188342	GTF2F2	general transcription factor IIF subunit 2
chr13	45810120	45810519	400	*	MACS_peak_2457	82.77	Intron (uc001uzw.3/2963, intron 5 of 7)	13	45766988	45775175	8188	2	386618	uc001uzx.4	-34945	ENSG00000180332	KCTD4	potassium channel tetramerization domain containing 4
chr13	46038330	46039040	711	*	MACS_peak_2458	72.65	Promoter (<=1kb)	13	46039030	46060710	21681	1	83548	uc010tfu.2	0	ENSG00000136152	COG3	component of oligomeric golgi complex 3
chr13	46074706	46075471	766	*	MACS_peak_2459	99.6	Intron (uc001vak.3/83548, intron 13 of 22)	13	46050336	46110833	60498	1	83548	uc010aci.3	24370	ENSG00000136152	COG3	component of oligomeric golgi complex 3
chr13	46631607	46632428	822	*	MACS_peak_2460	153.71	Exon (uc001vaw.3/1361, exon 9 of 11)	13	46626983	46675482	48500	1	100509894	uc001vav.1	4624	ENSG00000235903	CPB2-AS1	CPB2 antisense RNA 1
chr13	46699617	46700161	545	*	MACS_peak_2461	58.39	3' UTR	13	46700058	46717015	16958	2	3936	uc010ack.3	16854	ENSG00000136167	LCP1	lymphocyte cytosolic protein 1
chr13	46964006	46964667	662	*	MACS_peak_2462	166.95	Promoter (<=1kb)	13	46916137	46964147	48011	2	80183	uc001vbh.4	0	ENSG00000102445	RUBCNL	RUN and cysteine rich domain containing beclin 1 interacting protein like
chr13	47170446	47171128	683	*	MACS_peak_2463	84.84	Intron (uc010acp.2/23143, intron 1 of 12)	13	47127296	47327175	199880	1	23143	uc001vbl.4	43150	ENSG00000136141	LRCH1	leucine rich repeats and calponin homology domain containing 1
chr13	47205143	47205515	373	*	MACS_peak_2464	65.95	Intron (uc010acp.2/23143, intron 1 of 12)	13	47127296	47327175	199880	1	23143	uc001vbl.4	77847	ENSG00000136141	LRCH1	leucine rich repeats and calponin homology domain containing 1
chr13	47265459	47265818	360	*	MACS_peak_2465	103.9	Intron (uc010acp.2/23143, intron 7 of 12)	13	47349523	47355750	6228	2	2098	uc001vbp.1	89932	ENSG00000139684	ESD	esterase D
chr13	47370515	47371270	756	*	MACS_peak_2466	70.22	Promoter (<=1kb)	13	47345391	47371367	25977	2	2098	uc001vbn.3	97	ENSG00000139684	ESD	esterase D
chr13	47440340	47440999	660	*	MACS_peak_2467	65.01	Intron (uc001vbr.4/3356, intron 2 of 2)	13	47405677	47471211	65535	2	3356	uc001vbr.4	30212	ENSG00000102468	HTR2A	5-hydroxytryptamine receptor 2A
chr13	47445754	47446161	408	*	MACS_peak_2468	56.04	Intron (uc001vbr.4/3356, intron 2 of 2)	13	47405677	47471211	65535	2	3356	uc001vbr.4	25050	ENSG00000102468	HTR2A	5-hydroxytryptamine receptor 2A
chr13	48877529	48878035	507	*	MACS_peak_2470	59.59	Promoter (<=1kb)	13	48870649	48877797	7149	2	100862704	uc001vca.3	0	ENSG00000231473	LINC00441	long intergenic non-protein coding RNA 441
chr13	49660905	49661328	424	*	MACS_peak_2473	62.15	Intron (uc001vcl.1/22862, intron 3 of 7)	13	49684449	49765245	80797	1	22862	uc001vcp.1	-23121	ENSG00000102531	FNDC3A	fibronectin type III domain containing 3A
chr13	49684155	49684562	408	*	MACS_peak_2474	234.9	Promoter (<=1kb)	13	49684449	49765245	80797	1	22862	uc001vcp.1	0	ENSG00000102531	FNDC3A	fibronectin type III domain containing 3A
chr13	50018853	50019721	869	*	MACS_peak_2476	195.95	Promoter (<=1kb)	13	50018429	50069139	50711	1	83852	uc001vcz.3	424	ENSG00000136169	SETDB2	SET domain bifurcated 2
chr13	50699571	50699998	428	*	MACS_peak_2477	54.86	Promoter (<=1kb)	13	50556688	50699677	142990	2	8847	uc001vdn.1	0	ENSG00000231607	DLEU2	deleted in lymphocytic leukemia 2 (non-protein coding)
chr13	50799790	50800178	389	*	MACS_peak_2478	53.81	Intron (uc010adl.1/10301, intron 1 of 1)	13	50746154	50747751	1598	1	145165	uc001vej.3	53636	NA	ST13P4	ST13, Hsp70 interacting protein pseudogene 4
chr13	50975205	50975628	424	*	MACS_peak_2479	83.99	Exon (uc001ven.1/uc001ven.1, exon 6 of 6)	13	50746154	50747751	1598	1	145165	uc001vej.3	229051	NA	ST13P4	ST13, Hsp70 interacting protein pseudogene 4
chr13	51024103	51025070	968	*	MACS_peak_2480	60.09	Intron (uc001vee.1/10301, intron 5 of 5)	13	50746154	50747751	1598	1	145165	uc001vej.3	277949	NA	ST13P4	ST13, Hsp70 interacting protein pseudogene 4
chr13	51058338	51059194	857	*	MACS_peak_2481	134.74	Intron (uc001vee.1/10301, intron 5 of 5)	13	50746154	50747751	1598	1	145165	uc001vej.3	312184	NA	ST13P4	ST13, Hsp70 interacting protein pseudogene 4
chr13	51579747	51580078	332	*	MACS_peak_2484	69.3	Intron (uc001vfc.4/2974, intron 15 of 16)	13	51568647	51640293	71647	2	2974	uc001vfc.4	60215	ENSG00000123201	GUCY1B2	guanylate cyclase 1 soluble subunit beta 2 (pseudogene)
chr13	51622017	51622542	526	*	MACS_peak_2485	102.72	5' UTR	13	51568647	51640293	71647	2	2974	uc001vfc.4	17751	ENSG00000123201	GUCY1B2	guanylate cyclase 1 soluble subunit beta 2 (pseudogene)
chr13	51849160	51849608	449	*	MACS_peak_2486	102.61	Intron (uc001vff.2/220108, intron 4 of 4)	13	51796470	51858377	61908	1	220108	uc001vfg.2	52690	ENSG00000150510	FAM124A	family with sequence similarity 124 member A
chr13	52158026	52158353	328	*	MACS_peak_2489	61.01	Promoter (<=1kb)	13	52158484	52325801	167318	1	115825	uc010ads.1	-131	ENSG00000139668	WDFY2	WD repeat and FYVE domain containing 2
chr13	52400705	52401131	427	*	MACS_peak_2490	77.87	Exon (uc010tgq.1/283521, exon 3 of 5)	13	52387483	52419286	31804	2	283521	uc001vft.1	18155	ENSG00000281106	TMEM272	transmembrane protein 272
chr13	53226513	53227024	512	*	MACS_peak_2491	60.38	Promoter (<=1kb)	13	53226831	53262433	35603	1	10910	uc001vhb.2	0	ENSG00000165416	SUGT1	SGT1 homolog, MIS12 kinetochore complex assembly cochaperone
chr13	67094428	67095262	835	*	MACS_peak_2505	55.05	Intron (uc010aei.3/5101, intron 3 of 3)	13	67399301	67489163	89863	1	100874064	uc031qmb.1	-304039	ENSG00000228842	PCDH9-AS2	PCDH9 antisense RNA 2
chr13	74707593	74708340	748	*	MACS_peak_2510	116.81	Promoter (<=1kb)	13	74260149	74708066	447918	2	11278	uc001vjf.3	0	ENSG00000118922	KLF12	Kruppel like factor 12
chr13	74820852	74821368	517	*	MACS_peak_2512	50.23	Intron (uc001vji.1/uc001vji.1, intron 1 of 1)	13	74260149	74708394	448246	2	11278	uc010aeq.3	-112458	ENSG00000118922	KLF12	Kruppel like factor 12
chr13	75900710	75901046	337	*	MACS_peak_2515	62.66	Intron (uc001vjl.1/9882, intron 9 of 20)	13	75858809	75890739	31931	2	9882	uc010thu.1	-9971	ENSG00000136111	TBC1D4	TBC1 domain family member 4
chr13	77805195	77805736	542	*	MACS_peak_2521	50.33	Intron (uc010aev.3/23077, intron 18 of 82)	13	77618792	77901177	282386	2	23077	uc010aev.3	95441	ENSG00000005810	MYCBP2	MYC binding protein 2, E3 ubiquitin protein ligase
chr13	77901187	77901472	286	*	MACS_peak_2522	52.33	Promoter (<=1kb)	13	77618792	77901177	282386	2	23077	uc021rks.1	-10	ENSG00000005810	MYCBP2	MYC binding protein 2, E3 ubiquitin protein ligase
chr13	78167312	78167647	336	*	MACS_peak_2523	51.48	Intron (uc001vki.3/8796, intron 11 of 32)	13	78109809	78219398	109590	1	8796	uc010thx.2	57503	ENSG00000136155	SCEL	sciellin
chr13	78315131	78315547	417	*	MACS_peak_2524	52.91	Promoter (<=1kb)	13	78315295	78338377	23083	1	122060	uc001vkl.1	0	ENSG00000139737	SLAIN1	SLAIN motif family member 1
chr13	78427635	78428414	780	*	MACS_peak_2526	163	Intron (uc001vkn.1/uc001vkn.1, intron 6 of 6)	13	78469616	78492966	23351	2	1910	uc001vko.2	64552	ENSG00000136160	EDNRB	endothelin receptor type B
chr13	78492664	78493083	420	*	MACS_peak_2527	50.97	Promoter (<=1kb)	13	78469616	78492966	23351	2	1910	uc001vko.2	0	ENSG00000136160	EDNRB	endothelin receptor type B
chr13	78493689	78494204	516	*	MACS_peak_2528	90.85	Promoter (<=1kb)	13	78493824	79158297	664474	1	100874222	uc001vks.3	0	ENSG00000234377	RNF219-AS1	RNF219 antisense RNA 1
chr13	78543275	78543837	563	*	MACS_peak_2529	93.83	Intron (uc001vks.3/100874222, intron 1 of 2)	13	78469616	78549664	80049	2	1910	uc001vkq.1	5827	ENSG00000136160	EDNRB	endothelin receptor type B
chr13	78604022	78604474	453	*	MACS_peak_2530	75.87	Exon (uc031qmk.1/100874175, exon 3 of 6)	13	78587018	78627730	40713	1	100874175	uc031qmk.1	17004	NA	LINC00446	long intergenic non-protein coding RNA 446
chr13	80914943	80915888	946	*	MACS_peak_2536	51.07	Promoter (<=1kb)	13	80910112	80915086	4975	2	10253	uc001vlj.3	0	ENSG00000136158	SPRY2	sprouty RTK signaling antagonist 2
chr13	86071771	86072111	341	*	MACS_peak_2540	62.66	Intron (uc031qmo.1/100874137, intron 1 of 3)	13	85937738	86118797	181060	1	100874137	uc031qmo.1	134033	ENSG00000226317	LINC00351	long intergenic non-protein coding RNA 351
chr13	92001367	92001740	374	*	MACS_peak_2546	56.41	Promoter (1-2kb)	13	92002859	92003645	787	1	406980	uc021rlf.1	-1119	ENSG00000284375	MIR19B1	microRNA 19b-1
chr13	95131819	95132588	770	*	MACS_peak_2547	221.86	Promoter (<=1kb)	13	95091841	95131936	40096	2	1638	uc001vlv.4	0	ENSG00000080166	DCT	dopachrome tautomerase
chr13	96356862	96357108	247	*	MACS_peak_2549	92.79	Intron (uc001vmp.3/5611, intron 1 of 4)	13	96329393	96447243	117851	1	5611	uc001vmq.3	27469	ENSG00000102580	DNAJC3	DnaJ heat shock protein family (Hsp40) member C3
chr13	97846440	97847023	584	*	MACS_peak_2551	124.03	Intron (uc031qmz.1/10150, intron 1 of 7)	13	97874550	98046374	171825	1	10150	uc001vmz.4	-27527	ENSG00000139793	MBNL2	muscleblind like splicing regulator 2
chr13	97863725	97864033	309	*	MACS_peak_2552	56.63	Intron (uc031qmz.1/10150, intron 1 of 7)	13	97874550	98046374	171825	1	10150	uc001vmz.4	-10517	ENSG00000139793	MBNL2	muscleblind like splicing regulator 2
chr13	97910236	97910616	381	*	MACS_peak_2553	58.35	Intron (uc031qmz.1/10150, intron 2 of 7)	13	97927886	98046374	118489	1	10150	uc010tij.2	-17270	ENSG00000139793	MBNL2	muscleblind like splicing regulator 2
chr13	97937445	97938205	761	*	MACS_peak_2554	69.96	Intron (uc031qmz.1/10150, intron 3 of 7)	13	97927886	98046374	118489	1	10150	uc010tij.2	9559	ENSG00000139793	MBNL2	muscleblind like splicing regulator 2
chr13	98019443	98020015	573	*	MACS_peak_2555	51.01	Intron (uc031qmz.1/10150, intron 7 of 7)	13	97999295	98011528	12234	1	10150	uc001vnc.3	20148	ENSG00000139793	MBNL2	muscleblind like splicing regulator 2
chr13	98907629	98908334	706	*	MACS_peak_2558	92.47	Intron (uc001vnh.3/10160, intron 2 of 27)	13	98860778	98860854	77	1	100422881	uc021rlt.1	46851	ENSG00000263399	MIR3170	microRNA 3170
chr13	98944014	98944280	267	*	MACS_peak_2559	109.09	Intron (uc001vnh.3/10160, intron 2 of 27)	13	98860778	98860854	77	1	100422881	uc021rlt.1	83236	ENSG00000263399	MIR3170	microRNA 3170
chr13	99173466	99173953	488	*	MACS_peak_2560	60.68	Promoter (<=1kb)	13	99102455	99174341	71887	2	8428	uc001vnm.1	388	ENSG00000102572	STK24	serine/threonine kinase 24
chr13	99880916	99881786	871	*	MACS_peak_2561	78.85	Intron (uc001voa.4/337867, intron 1 of 8)	13	99853163	100038753	185591	1	337867	uc010tiw.2	27753	ENSG00000134882	UBAC2	UBA domain containing 2
chr13	102069405	102069912	508	*	MACS_peak_2563	53.54	Promoter (<=1kb)	13	101832739	102068843	236105	2	259232	uc001vpa.2	-562	ENSG00000102452	NALCN	sodium leak channel, non-selective
chr13	102497945	102498381	437	*	MACS_peak_2564	51.76	Intron (uc001vpe.2/2259, intron 3 of 4)	13	102373205	102568995	195791	2	2259	uc001vpe.2	70614	ENSG00000102466	FGF14	fibroblast growth factor 14
chr13	103248995	103249511	517	*	MACS_peak_2565	74.66	Promoter (<=1kb)	13	103249286	103331523	82238	1	7174	uc001vpi.4	0	ENSG00000134900	TPP2	tripeptidyl peptidase 2
chr13	103470109	103470711	603	*	MACS_peak_2567	71.06	Promoter (2-3kb)	13	103472737	103493888	21152	1	54841	uc001vpv.3	-2026	ENSG00000134897	BIVM	basic, immunoglobulin-like variable motif containing
chr13	108086767	108087247	481	*	MACS_peak_2575	61.87	Intron (uc001vql.3/728215, intron 1 of 2)	13	107820879	108519460	698582	2	728215	uc001vql.3	432213	ENSG00000204442	FAM155A	family with sequence similarity 155 member A
chr13	108959118	108959628	511	*	MACS_peak_2577	60.36	3' UTR	13	108955154	108955713	560	1	10673	uc001vqs.1	3964	ENSG00000102524	TNFSF13B	TNF superfamily member 13b
chr13	109273712	109274307	596	*	MACS_peak_2578	71.49	Intron (uc001vqt.1/23026, intron 1 of 34)	13	109281571	109860355	578785	1	23026	uc010agk.2	-7264	ENSG00000041515	MYO16	myosin XVI
chr13	109394945	109395347	403	*	MACS_peak_2579	85.88	Intron (uc001vqt.1/23026, intron 4 of 34)	13	109445864	109708405	262542	1	23026	uc001vqu.1	-50517	ENSG00000041515	MYO16	myosin XVI
chr13	109407107	109407704	598	*	MACS_peak_2580	52.82	Intron (uc001vqt.1/23026, intron 4 of 34)	13	109445864	109708405	262542	1	23026	uc001vqu.1	-38160	ENSG00000041515	MYO16	myosin XVI
chr13	109511558	109512542	985	*	MACS_peak_2581	166.71	Intron (uc001vqt.1/23026, intron 11 of 34)	13	109538495	109780039	241545	1	23026	uc010tjh.1	-25953	ENSG00000041515	MYO16	myosin XVI
chr13	109567833	109568461	629	*	MACS_peak_2582	116.28	Intron (uc001vqt.1/23026, intron 16 of 34)	13	109538495	109780039	241545	1	23026	uc010tjh.1	29338	ENSG00000041515	MYO16	myosin XVI
chr13	109832936	109833904	969	*	MACS_peak_2583	126.91	Intron (uc001vqt.1/23026, intron 34 of 34)	13	109816253	109819651	3399	2	100885782	uc031qng.1	-13285	ENSG00000236242	MYO16-AS1	MYO16 antisense RNA 1
chr13	110430505	110430942	438	*	MACS_peak_2585	54.29	Intron (uc001vqv.3/8660, intron 1 of 1)	13	110406184	110438914	32731	2	8660	uc001vqv.3	7972	ENSG00000185950	IRS2	insulin receptor substrate 2
chr13	111049848	111050128	281	*	MACS_peak_2590	76.11	Intron (uc001vqx.3/1284, intron 4 of 47)	13	110959631	111165373	205743	1	1284	uc001vqx.3	90217	ENSG00000134871	COL4A2	collagen type IV alpha 2 chain
chr13	111061609	111062406	798	*	MACS_peak_2591	53.22	Intron (uc001vqx.3/1284, intron 4 of 47)	13	111154923	111160526	5604	2	100874203	uc031qnh.1	98120	ENSG00000232814	COL4A2-AS1	COL4A2 antisense RNA 1
chr13	111077171	111078006	836	*	MACS_peak_2592	69.65	Exon (uc001vqx.3/1284, exon 5 of 48)	13	111154923	111160526	5604	2	100874203	uc031qnh.1	82520	ENSG00000232814	COL4A2-AS1	COL4A2 antisense RNA 1
chr13	111567648	111568385	738	*	MACS_peak_2594	104.84	Promoter (<=1kb)	13	111545045	111567416	22372	2	55608	uc001vro.1	-232	ENSG00000088448	ANKRD10	ankyrin repeat domain 10
chr13	113241641	113241975	335	*	MACS_peak_2597	85.97	Promoter (<=1kb)	13	113139328	113242481	103154	2	10426	uc001vse.1	506	ENSG00000126216	TUBGCP3	tubulin gamma complex associated protein 3
chr13	113676966	113677404	439	*	MACS_peak_2598	95.68	Intron (uc031qnk.1/23263, intron 2 of 27)	13	113656028	113754053	98026	1	23263	uc010tjs.2	20938	ENSG00000126217	MCF2L	MCF.2 cell line derived transforming sequence like
chr13	113695616	113696039	424	*	MACS_peak_2599	52.5	Promoter (2-3kb)	13	113698969	113741770	42802	1	23263	uc001vst.1	-2930	ENSG00000126217	MCF2L	MCF.2 cell line derived transforming sequence like
chr13	113737996	113738347	352	*	MACS_peak_2600	66.25	Exon (uc031qnk.1/23263, exon 18 of 28)	13	113760102	113771528	11427	1	2155	uc010agp.2	-21755	ENSG00000057593	F7	coagulation factor VII
chr13	113841523	113841924	402	*	MACS_peak_2601	53.81	Promoter (1-2kb)	13	113831853	113840346	8494	2	55795	uc001vtb.3	-1177	ENSG00000126226	PCID2	PCI domain containing 2
chr13	113950812	113951673	862	*	MACS_peak_2602	112.35	Promoter (<=1kb)	13	113951469	113977741	26273	1	3916	uc001vtm.1	0	ENSG00000185896	LAMP1	lysosomal associated membrane protein 1
chr13	114279356	114280501	1146	*	MACS_peak_2603	77.07	Intron (uc010tkd.2/7027, intron 4 of 10)	13	114303122	114312513	9392	2	496	uc001vtz.3	32012	ENSG00000186009	ATP4B	ATPase H+/K+ transporting beta subunit
chr13	114803752	114804195	444	*	MACS_peak_2604	107.47	Promoter (2-3kb)	13	114786880	114801669	14790	2	22821	uc010aha.1	-2083	ENSG00000185989	RASA3	RAS p21 protein activator 3
chr13	114829845	114830435	591	*	MACS_peak_2605	189.37	Intron (uc010tkk.2/22821, intron 2 of 23)	13	114747194	114843438	96245	2	22821	uc010tkk.2	13003	ENSG00000185989	RASA3	RAS p21 protein activator 3
chr13	114830617	114830951	335	*	MACS_peak_2606	77.58	Intron (uc010tkk.2/22821, intron 2 of 23)	13	114747194	114843438	96245	2	22821	uc010tkk.2	12487	ENSG00000185989	RASA3	RAS p21 protein activator 3
chr13	114880722	114881228	507	*	MACS_peak_2607	56.89	Intron (uc001vui.3/22821, intron 1 of 23)	13	114747194	114898095	150902	2	22821	uc001vui.3	16867	ENSG00000185989	RASA3	RAS p21 protein activator 3
chr14	20811357	20811777	421	*	MACS_peak_2610	94.83	Promoter (<=1kb)	14	20811773	20826062	14290	1	10038	uc001vxb.1	0	ENSG00000129484	PARP2	poly(ADP-ribose) polymerase 2
chr14	20846995	20847518	524	*	MACS_peak_2611	56.07	Promoter (2-3kb)	14	20839648	20850515	10868	2	7011	uc010tlh.1	2997	ENSG00000129566	TEP1	telomerase associated protein 1
chr14	20923000	20923567	568	*	MACS_peak_2612	74.43	Promoter (<=1kb)	14	20923290	20925931	2642	1	328	uc001vxg.3	0	ENSG00000100823	APEX1	apurinic/apyrimidinic endodeoxyribonuclease 1
chr14	20929610	20930204	595	*	MACS_peak_2613	141.22	Promoter (<=1kb)	14	20926012	20929637	3626	2	90809	uc001vxk.2	0	ENSG00000165782	PIP4P1	phosphatidylinositol-4,5-bisphosphate 4-phosphatase 1
chr14	21081685	21082019	335	*	MACS_peak_2614	96.91	Exon (uc021rny.1/uc021rny.1, exon 1 of 1)	14	21058240	21058982	743	2	493901	uc001vxt.3	-22703	ENSG00000258436	RNASE12	ribonuclease A family member 12 (inactive)
chr14	21131014	21131401	388	*	MACS_peak_2615	51.48	Exon (uc021rof.1/uc021rof.1, exon 1 of 1)	14	21152336	21162345	10010	1	283	uc001vxw.4	-20935	ENSG00000214274	ANG	angiogenin
chr14	21571658	21572385	728	*	MACS_peak_2618	96.98	Promoter (<=1kb)	14	21558205	21572863	14659	2	51222	uc010aik.1	478	ENSG00000165804	ZNF219	zinc finger protein 219
chr14	21851953	21852494	542	*	MACS_peak_2619	53.35	Promoter (<=1kb)	14	21819631	21852425	32795	2	11198	uc001wao.2	0	ENSG00000092201	SUPT16H	SPT16 homolog, facilitates chromatin remodeling subunit
chr14	21945076	21945489	414	*	MACS_peak_2620	91.68	Promoter (<=1kb)	14	21927179	21945132	17954	2	84932	uc001wax.3	0	ENSG00000129472	RAB2B	RAB2B, member RAS oncogene family
chr14	21979262	21979751	490	*	MACS_peak_2621	81.86	Promoter (<=1kb)	14	21966282	21979457	13176	2	56339	uc001wbc.3	0	ENSG00000165819	METTL3	methyltransferase like 3
chr14	22838217	22838781	565	*	MACS_peak_2622	57.87	Intron (uc001wbw.2/uc001wbw.2, intron 2 of 5)	14	23033807	23058143	24337	2	1603	uc001wgl.2	219362	ENSG00000129562	DAD1	defender against cell death 1
chr14	23005744	23006426	683	*	MACS_peak_2623	61.07	Intron (uc001wbw.2/uc001wbw.2, intron 3 of 5)	14	23033807	23058143	24337	2	1603	uc001wgl.2	51717	ENSG00000129562	DAD1	defender against cell death 1
chr14	23235405	23236137	733	*	MACS_peak_2625	73.05	Promoter (<=1kb)	14	23235731	23237831	2101	1	5018	uc010tnc.2	0	ENSG00000155463	OXA1L	OXA1L, mitochondrial inner membrane protein
chr14	23316803	23317511	709	*	MACS_peak_2626	62.13	3' UTR	14	23305793	23316803	11011	1	4323	uc001whc.3	11010	ENSG00000157227	MMP14	matrix metallopeptidase 14
chr14	23451728	23452200	473	*	MACS_peak_2628	52.06	Promoter (<=1kb)	14	23440410	23451848	11439	2	84962	uc001whz.3	0	ENSG00000129474	AJUBA	ajuba LIM protein
chr14	23547790	23548266	477	*	MACS_peak_2629	110.01	Promoter (1-2kb)	14	23527774	23550018	22245	2	22985	uc001wis.4	1752	ENSG00000100813	ACIN1	apoptotic chromatin condensation inducer 1
chr14	23610954	23611592	639	*	MACS_peak_2630	75.95	Intron (uc001wix.4/23428, intron 2 of 8)	14	23594504	23599352	4849	2	23428	uc001wiw.3	-11602	ENSG00000092068	SLC7A8	solute carrier family 7 member 8
chr14	23770566	23770914	349	*	MACS_peak_2631	101.39	Promoter (<=1kb)	14	23765586	23770748	5163	2	90673	uc001wjc.2	0	ENSG00000235194	PPP1R3E	protein phosphatase 1 regulatory subunit 3E
chr14	23790061	23790426	366	*	MACS_peak_2632	56.72	Promoter (<=1kb)	14	23789397	23795394	5998	1	8106	uc001wjk.3	664	ENSG00000100836	PABPN1	poly(A) binding protein nuclear 1
chr14	24102655	24103079	425	*	MACS_peak_2633	55.06	Promoter (2-3kb)	14	24105573	24114848	9276	1	10202	uc001wkt.4	-2494	ENSG00000100867	DHRS2	dehydrogenase/reductase 2
chr14	24442372	24442903	532	*	MACS_peak_2634	90.65	Intron (uc001wlc.4/10901, intron 6 of 7)	14	24439224	24475617	36394	1	317749	uc021rre.1	3148	ENSG00000187630	DHRS4L2	dehydrogenase/reductase 4 like 2
chr14	24583834	24584635	802	*	MACS_peak_2635	75.2	Promoter (<=1kb)	14	24549316	24584223	34908	2	4901	uc001wlq.3	0	ENSG00000129535	NRL	neural retina leucine zipper
chr14	24630070	24630834	765	*	MACS_peak_2636	66.19	Promoter (<=1kb)	14	24629729	24635774	6046	1	10379	uc001wmq.3	341	ENSG00000213928	IRF9	interferon regulatory factor 9
chr14	24682645	24682997	353	*	MACS_peak_2637	164.83	Promoter (<=1kb)	14	24657925	24683357	25433	2	10548	uc010tob.1	360	ENSG00000100926	TM9SF1	transmembrane 9 superfamily member 1
chr14	24911450	24911961	512	*	MACS_peak_2638	50.47	Promoter (<=1kb)	14	24908972	24911658	2687	2	56948	uc001wpi.3	0	ENSG00000100445	SDR39U1	short chain dehydrogenase/reductase family 39U member 1
chr14	25464219	25464692	474	*	MACS_peak_2640	95.13	Intron (uc001wpu.3/29091, intron 1 of 5)	14	25281306	25519095	237790	2	29091	uc001wpu.3	54403	ENSG00000168952	STXBP6	syntaxin binding protein 6
chr14	30242194	30242672	479	*	MACS_peak_2646	64.91	Intron (uc001wqh.3/5587, intron 1 of 17)	14	29896117	30174608	278492	2	100616347	uc021rrv.1	-67586	ENSG00000265226	MIR548AI	microRNA 548ai
chr14	30334321	30334974	654	*	MACS_peak_2647	119.88	Intron (uc001wqh.3/5587, intron 1 of 17)	14	30045687	30396899	351213	2	5587	uc001wqh.3	61925	ENSG00000184304	PRKD1	protein kinase D1
chr14	31559547	31560324	778	*	MACS_peak_2648	54.75	Intron (uc021rry.1/11154, intron 5 of 5)	14	31569324	31592876	23553	2	25831	uc001wra.1	32552	ENSG00000092148	HECTD1	HECT domain E3 ubiquitin protein ligase 1
chr14	31847360	31847639	280	*	MACS_peak_2651	92.79	Intron (uc010ami.3/25938, intron 4 of 27)	14	31760994	31856581	95588	2	25938	uc010ami.3	8942	ENSG00000129493	HEATR5A	HEAT repeat containing 5A
chr14	32544872	32545266	395	*	MACS_peak_2654	60.75	Promoter (<=1kb)	14	32544625	32545905	1281	2	84837	uc010amk.3	639	NA	ARHGAP5-AS1	ARHGAP5 antisense RNA 1 (head to head)
chr14	32825849	32826291	443	*	MACS_peak_2657	54.01	Intron (uc010aml.3/9472, intron 1 of 9)	14	32798479	33302268	503790	1	9472	uc001wrq.3	27370	ENSG00000151320	AKAP6	A-kinase anchoring protein 6
chr14	32887102	32887674	573	*	MACS_peak_2658	67.34	Intron (uc010aml.3/9472, intron 1 of 9)	14	32798479	33302268	503790	1	9472	uc001wrq.3	88623	ENSG00000151320	AKAP6	A-kinase anchoring protein 6
chr14	32979025	32979546	522	*	MACS_peak_2659	55.52	Intron (uc010aml.3/9472, intron 2 of 9)	14	32798479	33302268	503790	1	9472	uc001wrq.3	180546	ENSG00000151320	AKAP6	A-kinase anchoring protein 6
chr14	33148990	33150007	1018	*	MACS_peak_2660	110.84	Intron (uc010aml.3/9472, intron 8 of 9)	14	33408459	34273382	864924	1	64067	uc001wrs.3	-258452	ENSG00000151322	NPAS3	neuronal PAS domain protein 3
chr14	33178127	33178664	538	*	MACS_peak_2661	55.21	Intron (uc010aml.3/9472, intron 9 of 9)	14	33408459	34273382	864924	1	64067	uc001wrs.3	-229795	ENSG00000151322	NPAS3	neuronal PAS domain protein 3
chr14	33194126	33194581	456	*	MACS_peak_2662	71.25	Intron (uc010aml.3/9472, intron 9 of 9)	14	33408459	34273382	864924	1	64067	uc001wrs.3	-213878	ENSG00000151322	NPAS3	neuronal PAS domain protein 3
chr14	33197128	33197671	544	*	MACS_peak_2663	70.27	Intron (uc010aml.3/9472, intron 9 of 9)	14	33408459	34273382	864924	1	64067	uc001wrs.3	-210788	ENSG00000151322	NPAS3	neuronal PAS domain protein 3
chr14	33453533	33454185	653	*	MACS_peak_2664	98.45	Intron (uc001wrs.3/64067, intron 1 of 11)	14	33408459	34273382	864924	1	64067	uc001wrv.3	45074	ENSG00000151322	NPAS3	neuronal PAS domain protein 3
chr14	33755610	33755907	298	*	MACS_peak_2665	85.97	Intron (uc001wrs.3/64067, intron 3 of 11)	14	33684388	34150248	465861	1	64067	uc001wrw.3	71222	ENSG00000151322	NPAS3	neuronal PAS domain protein 3
chr14	34106417	34107015	599	*	MACS_peak_2666	52.78	Intron (uc001wrs.3/64067, intron 5 of 11)	14	34393421	34420032	26612	2	112399	uc001wry.3	313017	ENSG00000129521	EGLN3	egl-9 family hypoxia inducible factor 3
chr14	34145314	34145779	466	*	MACS_peak_2667	59.28	Exon (uc001wrs.3/64067, exon 6 of 12)	14	34393421	34420032	26612	2	112399	uc001wry.3	274253	ENSG00000129521	EGLN3	egl-9 family hypoxia inducible factor 3
chr14	34201382	34201712	331	*	MACS_peak_2668	77.72	Intron (uc001wrs.3/64067, intron 6 of 11)	14	34393421	34420032	26612	2	112399	uc001wry.3	218320	ENSG00000129521	EGLN3	egl-9 family hypoxia inducible factor 3
chr14	35451508	35452041	534	*	MACS_peak_2673	67.39	Promoter (<=1kb)	14	35452104	35498773	46670	1	6729	uc001wso.3	-63	ENSG00000100883	SRP54	signal recognition particle 54
chr14	35591060	35591967	908	*	MACS_peak_2674	161.09	Promoter (<=1kb)	14	35554678	35591519	36842	2	55012	uc001wss.3	0	ENSG00000092020	PPP2R3C	protein phosphatase 2 regulatory subunit B''gamma
chr14	35603985	35604364	380	*	MACS_peak_2675	56.41	Intron (uc001wsy.2/9692, intron 4 of 7)	14	35591758	35743497	151740	1	9692	uc031qof.1	12227	ENSG00000100890	KIAA0391	KIAA0391
chr14	36560250	36560720	471	*	MACS_peak_2679	55.4	Intron (uc031qog.1/101101773, intron 1 of 2)	14	36539633	36634494	94862	1	101101773	uc031qog.1	20617	ENSG00000257585	LINC00609	long intergenic non-protein coding RNA 609
chr14	39901380	39902041	662	*	MACS_peak_2682	59.87	Promoter (<=1kb)	14	39865577	39901704	36128	2	254170	uc001wvk.3	0	ENSG00000165355	FBXO33	F-box protein 33
chr14	45366229	45366677	449	*	MACS_peak_2692	81.87	Promoter (<=1kb)	14	45366507	45376460	9954	1	122525	uc001wvo.3	0	ENSG00000179476	C14orf28	chromosome 14 open reading frame 28
chr14	46600644	46601014	371	*	MACS_peak_2695	66.25	Intron (uc031qoi.1/100506412, intron 1 of 5)	14	46533362	46971104	437743	1	100506412	uc031qoj.1	67282	ENSG00000258700	LINC00871	long intergenic non-protein coding RNA 871
chr14	47696143	47696713	571	*	MACS_peak_2696	113.8	Intron (uc001wwi.4/161357, intron 2 of 16)	14	47308828	47812438	503611	2	161357	uc001wwi.4	115725	ENSG00000139915	MDGA2	MAM domain containing glycosylphosphatidylinositol anchor 2
chr14	47739793	47740188	396	*	MACS_peak_2697	76.11	Intron (uc001wwi.4/161357, intron 2 of 16)	14	47308828	47812438	503611	2	161357	uc001wwi.4	72250	ENSG00000139915	MDGA2	MAM domain containing glycosylphosphatidylinositol anchor 2
chr14	47911378	47912144	767	*	MACS_peak_2698	50.29	Intron (uc001wwj.4/161357, intron 1 of 16)	14	47308828	47812438	503611	2	161357	uc001wwi.4	-98940	ENSG00000139915	MDGA2	MAM domain containing glycosylphosphatidylinositol anchor 2
chr14	48129263	48130102	840	*	MACS_peak_2699	76.14	Intron (uc001wwj.4/161357, intron 1 of 16)	14	47308828	48144157	835330	2	161357	uc001wwj.4	14055	ENSG00000139915	MDGA2	MAM domain containing glycosylphosphatidylinositol anchor 2
chr14	50087298	50087548	251	*	MACS_peak_2701	75.35	Promoter (<=1kb)	14	50087489	50090199	2711	1	4247	uc001wwr.3	0	ENSG00000168282	MGAT2	mannosyl (alpha-1,6-)-glycoprotein beta-1,2-N-acetylglucosaminyltransferase
chr14	50234293	50234870	578	*	MACS_peak_2702	57.3	Promoter (<=1kb)	14	50234787	50249856	15070	1	23588	uc001wwx.3	0	ENSG00000165516	KLHDC2	kelch domain containing 2
chr14	50359223	50359792	570	*	MACS_peak_2703	78.54	Promoter (<=1kb)	14	50359736	50363772	4037	1	382	uc001wxg.4	0	ENSG00000165527	ARF6	ADP ribosylation factor 6
chr14	50458031	50458823	793	*	MACS_peak_2704	64.67	Intron (uc001wxi.1/283551, intron 3 of 3)	14	50448430	50474238	25809	2	283551	uc001wxi.1	15415	ENSG00000214900	LINC01588	long intergenic non-protein coding RNA 1588
chr14	50801749	50802482	734	*	MACS_peak_2706	82.04	Exon (uc010ant.2/27109, exon 6 of 6)	14	50785952	50802276	16325	1	27109	uc010ant.2	15797	ENSG00000125375	ATP5S	ATP synthase, H+ transporting, mitochondrial Fo complex subunit s (factor B)
chr14	51373032	51373391	360	*	MACS_peak_2708	59.33	Intron (uc001wyu.3/5836, intron 19 of 19)	14	51382543	51390818	8276	2	5836	uc010anz.1	17427	ENSG00000100504	PYGL	glycogen phosphorylase L
chr14	51387178	51387896	719	*	MACS_peak_2709	51.99	Promoter (2-3kb)	14	51382543	51390818	8276	2	5836	uc010anz.1	2922	ENSG00000100504	PYGL	glycogen phosphorylase L
chr14	51974395	51975415	1021	*	MACS_peak_2712	66.27	Intron (uc001wzb.4/122786, intron 1 of 14)	14	51955839	52197444	241606	1	122786	uc001wzb.4	18556	ENSG00000139926	FRMD6	FERM domain containing 6
chr14	52027466	52028232	767	*	MACS_peak_2713	92.4	Intron (uc001wzb.4/122786, intron 1 of 14)	14	51921230	52066670	145441	2	100874185	uc031qon.1	38438	ENSG00000258537	FRMD6-AS2	FRMD6 antisense RNA 2
chr14	52389127	52390053	927	*	MACS_peak_2714	78.09	Intron (uc001wzh.3/54331, intron 3 of 6)	14	52344310	52436518	92209	1	54331	uc001wzk.3	44817	ENSG00000186469	GNG2	G protein subunit gamma 2
chr14	52455631	52456367	737	*	MACS_peak_2715	51.22	Promoter (<=1kb)	14	52456228	52471420	15193	1	51637	uc010aod.3	0	ENSG00000087302	RTRAF	RNA transcription, translation and transport factor
chr14	53150664	53151125	462	*	MACS_peak_2717	65.28	Intron (uc001wzv.3/30001, intron 1 of 15)	14	53108605	53162419	53815	2	30001	uc001wzv.3	11294	ENSG00000197930	ERO1A	endoplasmic reticulum oxidoreductase 1 alpha
chr14	54955333	54956011	679	*	MACS_peak_2724	143.43	Promoter (<=1kb)	14	54941209	54955744	14536	2	2764	uc021rtf.1	0	ENSG00000197045	GMFB	glia maturation factor beta
chr14	54976401	54976722	322	*	MACS_peak_2725	72.73	Promoter (<=1kb)	14	54976587	55004554	27968	1	10668	uc010tra.1	0	ENSG00000100532	CGRRF1	cell growth regulator with ring finger domain 1
chr14	55094082	55094809	728	*	MACS_peak_2726	68.65	Intron (uc001xba.3/23034, intron 1 of 1)	14	55034330	55260033	225704	1	23034	uc001xbc.3	59752	ENSG00000020577	SAMD4A	sterile alpha motif domain containing 4A
chr14	55191564	55192195	632	*	MACS_peak_2727	92.44	Intron (uc001xbb.4/23034, intron 2 of 11)	14	55221506	55260033	38528	1	23034	uc001xbg.2	-29311	ENSG00000020577	SAMD4A	sterile alpha motif domain containing 4A
chr14	55240037	55240511	475	*	MACS_peak_2728	51.94	Intron (uc001xbb.4/23034, intron 8 of 11)	14	55221506	55260033	38528	1	23034	uc001xbg.2	18531	ENSG00000020577	SAMD4A	sterile alpha motif domain containing 4A
chr14	55855475	55856595	1121	*	MACS_peak_2731	177.27	Promoter (1-2kb)	14	55833109	55858020	24912	2	22863	uc001xbw.2	1425	ENSG00000126775	ATG14	autophagy related 14
chr14	56618968	56619549	582	*	MACS_peak_2733	50.22	Intron (uc001xch.3/57161, intron 1 of 5)	14	56585093	56768031	182939	1	57161	uc001xch.3	33875	ENSG00000139946	PELI2	pellino E3 ubiquitin protein ligase family member 2
chr14	58549041	58549831	791	*	MACS_peak_2735	86.63	Intron (uc001xdc.3/145407, intron 5 of 7)	14	58471391	58606132	134742	2	145407	uc001xdd.3	56301	ENSG00000139971	C14orf37	chromosome 14 open reading frame 37
chr14	58747574	58748582	1009	*	MACS_peak_2736	74.44	Intron (uc010tro.2/145407, intron 2 of 8)	14	58470808	58764855	294048	2	145407	uc010tro.2	16273	ENSG00000139971	C14orf37	chromosome 14 open reading frame 37
chr14	58764091	58764698	608	*	MACS_peak_2737	91.37	Promoter (<=1kb)	14	58470808	58764855	294048	2	145407	uc010tro.2	157	ENSG00000139971	C14orf37	chromosome 14 open reading frame 37
chr14	58893450	58894363	914	*	MACS_peak_2738	66.57	Promoter (<=1kb)	14	58875370	58893960	18591	2	26520	uc010aph.3	0	ENSG00000100575	TIMM9	translocase of inner mitochondrial membrane 9
chr14	59656952	59657419	468	*	MACS_peak_2746	58.87	Promoter (1-2kb)	14	59655450	59797406	141957	1	23002	uc001xeb.1	1502	ENSG00000100592	DAAM1	dishevelled associated activator of morphogenesis 1
chr14	59688100	59688819	720	*	MACS_peak_2747	134.14	Intron (uc001xdy.4/23002, intron 1 of 1)	14	59655450	59797406	141957	1	23002	uc001xeb.1	32650	ENSG00000100592	DAAM1	dishevelled associated activator of morphogenesis 1
chr14	59744807	59745233	427	*	MACS_peak_2748	217.45	Intron (uc001xea.2/23002, intron 2 of 24)	14	59730159	59838123	107965	1	23002	uc031qou.1	14648	ENSG00000100592	DAAM1	dishevelled associated activator of morphogenesis 1
chr14	60558368	60558913	546	*	MACS_peak_2749	56.14	Promoter (<=1kb)	14	60558629	60601532	42904	1	64430	uc001xer.4	0	ENSG00000126773	PCNX4	pecanex homolog 4
chr14	61447645	61448134	490	*	MACS_peak_2752	76.7	Promoter (<=1kb)	14	61447832	61519703	71872	1	145389	uc001xfg.2	0	ENSG00000139974	SLC38A6	solute carrier family 38 member 6
chr14	61664082	61664546	465	*	MACS_peak_2754	111.36	Intron (uc010tsa.2/5583, intron 1 of 12)	14	61654287	62017698	363412	1	5583	uc010tsa.2	9795	ENSG00000027075	PRKCH	protein kinase C eta
chr14	61680052	61680622	571	*	MACS_peak_2755	66.42	Intron (uc010tsa.2/5583, intron 1 of 12)	14	61654287	62017698	363412	1	5583	uc010tsa.2	25765	ENSG00000027075	PRKCH	protein kinase C eta
chr14	61905254	61905736	483	*	MACS_peak_2756	62.25	Intron (uc010tsa.2/5583, intron 1 of 12)	14	61943885	62017698	73814	1	5583	uc010tsb.2	-38149	ENSG00000027075	PRKCH	protein kinase C eta
chr14	61939621	61940045	425	*	MACS_peak_2757	51.98	Intron (uc010tsa.2/5583, intron 8 of 12)	14	61943885	62017698	73814	1	5583	uc010tsb.2	-3840	ENSG00000027075	PRKCH	protein kinase C eta
chr14	61969458	61970062	605	*	MACS_peak_2758	51.92	Intron (uc010tsa.2/5583, intron 9 of 12)	14	61943885	62017698	73814	1	5583	uc010tsb.2	25573	ENSG00000027075	PRKCH	protein kinase C eta
chr14	62004092	62004860	769	*	MACS_peak_2759	52.94	Intron (uc010tsa.2/5583, intron 11 of 12)	14	62010080	62017698	7619	1	5583	uc001xfo.3	-5220	ENSG00000027075	PRKCH	protein kinase C eta
chr14	62028535	62028951	417	*	MACS_peak_2761	72.95	Exon (uc031qov.1/uc031qov.1, exon 4 of 4)	14	62037258	62121431	84174	1	400221	uc021rtz.1	-8307	ENSG00000232774	FLJ22447	uncharacterized LOC400221
chr14	62120319	62120625	307	*	MACS_peak_2762	106.76	Exon (uc021rtz.1/400221, exon 3 of 3)	14	62162119	62193536	31418	1	3091	uc010tsc.1	-41494	ENSG00000100644	HIF1A	hypoxia inducible factor 1 alpha subunit
chr14	62161895	62162347	453	*	MACS_peak_2763	81.54	Promoter (<=1kb)	14	62162119	62193536	31418	1	3091	uc010tsc.1	0	ENSG00000100644	HIF1A	hypoxia inducible factor 1 alpha subunit
chr14	62531455	62531773	319	*	MACS_peak_2765	86.71	Intron (uc010tsd.1/83851, intron 2 of 5)	14	62546058	62568427	22370	1	83851	uc010tse.1	-14285	ENSG00000139973	SYT16	synaptotagmin 16
chr14	63670781	63671396	616	*	MACS_peak_2767	67.71	Promoter (<=1kb)	14	63671102	63760230	89129	1	57381	uc001xgb.2	0	ENSG00000126785	RHOJ	ras homolog family member J
chr14	64108049	64108565	517	*	MACS_peak_2768	60.07	Promoter (<=1kb)	14	64063757	64108641	44885	2	112840	uc001xgh.4	76	ENSG00000140006	WDR89	WD repeat domain 89
chr14	64400158	64400869	712	*	MACS_peak_2769	65.7	Intron (uc001xgk.3/23224, intron 2 of 8)	14	64375816	64604719	228904	1	23224	uc021ruh.1	24342	ENSG00000054654	SYNE2	spectrin repeat containing nuclear envelope protein 2
chr14	64970304	64970918	615	*	MACS_peak_2770	52.29	Promoter (<=1kb)	14	64970703	64991669	20967	1	22890	uc001xhh.4	0	ENSG00000126804	ZBTB1	zinc finger and BTB domain containing 1
chr14	65182188	65182742	555	*	MACS_peak_2773	51.9	Intron (uc001xhn.1/26030, intron 1 of 14)	14	65171193	65211060	39868	1	26030	uc001xho.1	10995	ENSG00000126822	PLEKHG3	pleckstrin homology and RhoGEF domain containing G3
chr14	65190978	65191618	641	*	MACS_peak_2774	81.7	Promoter (2-3kb)	14	65194311	65211060	16750	1	26030	uc001xhp.2	-2693	ENSG00000126822	PLEKHG3	pleckstrin homology and RhoGEF domain containing G3
chr14	65225363	65225817	455	*	MACS_peak_2775	86.58	Intron (uc010aqi.3/6710, intron 13 of 17)	14	65204777	65211060	6284	1	26030	uc001xhq.1	20586	ENSG00000126822	PLEKHG3	pleckstrin homology and RhoGEF domain containing G3
chr14	65453493	65453870	378	*	MACS_peak_2776	56.62	Promoter (<=1kb)	14	65453507	65529373	75867	1	2342	uc001xia.3	0	ENSG00000257365	FNTB	farnesyltransferase, CAAX box, beta
chr14	65568778	65569819	1042	*	MACS_peak_2777	72.77	Promoter (<=1kb)	14	65472819	65569262	96444	2	4149	uc001xic.2	0	ENSG00000125952	MAX	MYC associated factor X
chr14	66041126	66041647	522	*	MACS_peak_2778	97.23	Intron (uc001xin.3/2530, intron 3 of 10)	14	65879448	66210839	331392	1	2530	uc001xiq.3	161678	ENSG00000033170	FUT8	fucosyltransferase 8
chr14	67067106	67067665	560	*	MACS_peak_2780	155.27	Intron (uc001xiw.3/10243, intron 1 of 10)	14	66974125	67648525	674401	1	10243	uc010tst.2	92981	ENSG00000171723	GPHN	gephyrin
chr14	67826311	67827260	950	*	MACS_peak_2781	54.77	Promoter (<=1kb)	14	67827034	67853233	26200	1	1965	uc001xjg.3	0	ENSG00000134001	EIF2S1	eukaryotic translation initiation factor 2 subunit alpha
chr14	67863403	67864017	615	*	MACS_peak_2782	83.53	Intron (uc001xjh.1/26499, intron 2 of 8)	14	67853700	67878828	25129	2	26499	uc001xjh.1	14811	ENSG00000100558	PLEK2	pleckstrin 2
chr14	67928202	67928634	433	*	MACS_peak_2783	73.66	Intron (uc001xjj.1/161145, intron 5 of 6)	14	67853700	67878828	25129	2	26499	uc001xjh.1	-49374	ENSG00000100558	PLEK2	pleckstrin 2
chr14	68005892	68006302	411	*	MACS_peak_2784	86.47	Intron (uc001xjl.1/57475, intron 1 of 28)	14	68000008	68056255	56248	1	57475	uc001xjl.1	5884	ENSG00000054690	PLEKHH1	pleckstrin homology, MyTH4 and FERM domain containing H1
chr14	68037269	68037550	282	*	MACS_peak_2785	76.28	Promoter (<=1kb)	14	68037185	68056255	19071	1	57475	uc001xjn.1	84	ENSG00000054690	PLEKHH1	pleckstrin homology, MyTH4 and FERM domain containing H1
chr14	68160004	68160310	307	*	MACS_peak_2786	68.19	Promoter (2-3kb)	14	68143519	68162510	18992	2	51109	uc001xjv.4	2200	ENSG00000072042	RDH11	retinol dehydrogenase 11 (all-trans/9-cis/11-cis)
chr14	68171413	68171681	269	*	MACS_peak_2787	83	Promoter (2-3kb)	14	68168603	68201168	32566	1	145226	uc001xjz.4	2810	ENSG00000139988	RDH12	retinol dehydrogenase 12 (all-trans/9-cis/11-cis)
chr14	68228737	68229433	697	*	MACS_peak_2788	72.6	Promoter (<=1kb)	14	68217190	68228301	11112	2	23503	uc001xkb.3	-436	ENSG00000072121	ZFYVE26	zinc finger FYVE-type containing 26
chr14	68283012	68283738	727	*	MACS_peak_2789	108.51	Promoter (<=1kb)	14	68213237	68283306	70070	2	23503	uc001xka.2	0	ENSG00000072121	ZFYVE26	zinc finger FYVE-type containing 26
chr14	68287162	68287759	598	*	MACS_peak_2790	113.42	Promoter (<=1kb)	14	68286496	69196935	910440	1	5890	uc001xkg.2	666	ENSG00000182185	RAD51B	RAD51 paralog B
chr14	68407611	68407898	288	*	MACS_peak_2791	122.72	Intron (uc001xkd.3/5890, intron 7 of 10)	14	68286496	69196935	910440	1	5890	uc001xkg.2	121115	ENSG00000182185	RAD51B	RAD51 paralog B
chr14	68579927	68580476	550	*	MACS_peak_2792	68.81	Intron (uc001xkd.3/5890, intron 7 of 10)	14	68286496	69196935	910440	1	5890	uc001xkg.2	293431	ENSG00000182185	RAD51B	RAD51 paralog B
chr14	68599137	68599465	329	*	MACS_peak_2793	102.78	Intron (uc001xkd.3/5890, intron 7 of 10)	14	68286496	69196935	910440	1	5890	uc001xkg.2	312641	ENSG00000182185	RAD51B	RAD51 paralog B
chr14	68832884	68833803	920	*	MACS_peak_2794	56.25	Intron (uc001xkd.3/5890, intron 8 of 10)	14	69254372	69260631	6260	2	677	uc001xkh.2	426828	ENSG00000185650	ZFP36L1	ZFP36 ring finger protein like 1
chr14	68844136	68844772	637	*	MACS_peak_2795	61.11	Intron (uc001xkd.3/5890, intron 8 of 10)	14	69254372	69260631	6260	2	677	uc001xkh.2	415859	ENSG00000185650	ZFP36L1	ZFP36 ring finger protein like 1
chr14	68907469	68907982	514	*	MACS_peak_2796	54.1	Intron (uc001xkd.3/5890, intron 9 of 10)	14	69254372	69260631	6260	2	677	uc001xkh.2	352649	ENSG00000185650	ZFP36L1	ZFP36 ring finger protein like 1
chr14	69050344	69050987	644	*	MACS_peak_2797	52.84	Intron (uc001xkf.2/5890, intron 10 of 10)	14	69254372	69260631	6260	2	677	uc001xkh.2	209644	ENSG00000185650	ZFP36L1	ZFP36 ring finger protein like 1
chr14	69065318	69066051	734	*	MACS_peak_2798	63.23	Intron (uc001xkg.2/5890, intron 10 of 11)	14	69254372	69260631	6260	2	677	uc001xkh.2	194580	ENSG00000185650	ZFP36L1	ZFP36 ring finger protein like 1
chr14	69143969	69144408	440	*	MACS_peak_2799	51.6	Intron (uc001xkg.2/5890, intron 11 of 11)	14	69254372	69260631	6260	2	677	uc001xkh.2	116223	ENSG00000185650	ZFP36L1	ZFP36 ring finger protein like 1
chr14	69259509	69260510	1002	*	MACS_peak_2801	64.38	Promoter (<=1kb)	14	69254372	69260631	6260	2	677	uc001xkh.2	121	ENSG00000185650	ZFP36L1	ZFP36 ring finger protein like 1
chr14	69408517	69408903	387	*	MACS_peak_2802	77.72	Intron (uc010ttb.2/87, intron 1 of 20)	14	69340840	69444283	103444	2	87	uc010ttb.2	35380	ENSG00000072110	ACTN1	actinin alpha 1
chr14	69560542	69561126	585	*	MACS_peak_2803	80.99	Intron (uc001xkp.3/8816, intron 5 of 8)	14	69517637	69619914	102278	2	8816	uc001xkp.3	58788	ENSG00000139990	DCAF5	DDB1 and CUL4 associated factor 5
chr14	69985488	69986402	915	*	MACS_peak_2805	62.61	Intron (uc010ttf.1/400224, intron 6 of 12)	14	69951471	69995215	43745	1	400224	uc010ttf.1	34017	ENSG00000175985	PLEKHD1	pleckstrin homology and coiled-coil domain containing D1
chr14	70154886	70155364	479	*	MACS_peak_2806	67.51	Intron (uc001xlk.3/9766, intron 2 of 5)	14	70193619	70238722	45104	1	6430	uc001xll.3	-38255	ENSG00000100650	SRSF5	serine and arginine rich splicing factor 5
chr14	70255796	70256325	530	*	MACS_peak_2807	119.06	Intron (uc001xlr.2/6554, intron 1 of 4)	14	70242552	70264006	21455	2	6554	uc001xlr.2	7681	ENSG00000100652	SLC10A1	solute carrier family 10 member 1
chr14	70824907	70825112	206	*	MACS_peak_2808	131.1	Promoter (1-2kb)	14	70791798	70826448	34651	2	51241	uc001xmb.3	1336	ENSG00000133983	COX16	COX16, cytochrome c oxidase assembly homolog
chr14	70883645	70883895	251	*	MACS_peak_2809	106.26	Promoter (<=1kb)	14	70791798	70883807	92010	2	100529257	uc021rvm.1	0	ENSG00000258644	SYNJ2BP-COX16	SYNJ2BP-COX16 readthrough
chr14	73175105	73175666	562	*	MACS_peak_2815	105.91	Intron (uc001xnc.2/8110, intron 6 of 10)	14	73128568	73190813	62246	2	8110	uc001xnd.1	15147	ENSG00000205683	DPF3	double PHD fingers 3
chr14	73270834	73271460	627	*	MACS_peak_2816	95.65	Intron (uc001xnc.2/8110, intron 1 of 10)	14	73128568	73190813	62246	2	8110	uc001xnd.1	-80021	ENSG00000205683	DPF3	double PHD fingers 3
chr14	73393549	73394084	536	*	MACS_peak_2817	50.64	Promoter (<=1kb)	14	73393040	73426357	33318	1	26094	uc010ttt.2	509	ENSG00000119599	DCAF4	DDB1 and CUL4 associated factor 4
chr14	73493598	73494128	531	*	MACS_peak_2818	70.08	Promoter (<=1kb)	14	73436159	73493920	57762	2	53349	uc001xnm.3	0	ENSG00000165861	ZFYVE1	zinc finger FYVE-type containing 1
chr14	73524985	73525769	785	*	MACS_peak_2819	69.56	Promoter (<=1kb)	14	73525221	73567884	42664	1	58517	uc001xnn.4	0	ENSG00000119707	RBM25	RNA binding motif protein 25
chr14	73731639	73732051	413	*	MACS_peak_2820	50.82	Promoter (2-3kb)	14	73729106	73741347	12242	1	89932	uc010arn.3	2533	ENSG00000100767	PAPLN	papilin, proteoglycan like sulfated glycoprotein
chr14	73944175	73944733	559	*	MACS_peak_2821	78.84	Exon (uc001xoi.1/uc001xoi.1, exon 3 of 3)	14	73752933	73925286	172354	2	8650	uc001xoh.1	-18889	ENSG00000133961	NUMB	NUMB, endocytic adaptor protein
chr14	74252344	74253268	925	*	MACS_peak_2822	57.88	Promoter (<=1kb)	14	74181825	74253896	72072	2	91748	uc001xou.3	628	ENSG00000156030	ELMSAN1	ELM2 and Myb/SANT domain containing 1
chr14	74551447	74552040	594	*	MACS_peak_2824	98.42	Promoter (<=1kb)	14	74551656	74667117	115462	1	91750	uc001xpp.2	0	ENSG00000205659	LIN52	lin-52 DREAM MuvB core complex component
chr14	74959732	74960292	561	*	MACS_peak_2825	84.74	Promoter (<=1kb)	14	74946643	74960084	13442	2	10577	uc001xpy.3	0	ENSG00000119655	NPC2	NPC intracellular cholesterol transporter 2
chr14	75372406	75372849	444	*	MACS_peak_2826	104.56	3' UTR	14	75372347	75376851	4505	2	83694	uc001xqx.1	4002	ENSG00000198208	RPS6KL1	ribosomal protein S6 kinase like 1
chr14	75601289	75601722	434	*	MACS_peak_2827	60.75	3' UTR	14	75548818	75593778	44961	2	91754	uc001xrl.3	-7511	ENSG00000119638	NEK9	NIMA related kinase 9
chr14	75613839	75614846	1008	*	MACS_peak_2828	108.12	Promoter (<=1kb)	14	75598171	75614463	16293	2	10972	uc010asg.1	0	ENSG00000170348	TMED10	transmembrane p24 trafficking protein 10
chr14	75632534	75633207	674	*	MACS_peak_2829	92.52	Intron (uc001xrm.1/10972, intron 1 of 4)	14	75598171	75643349	45179	2	10972	uc001xrm.1	10142	ENSG00000170348	TMED10	transmembrane p24 trafficking protein 10
chr14	75643117	75643990	874	*	MACS_peak_2830	91.77	Promoter (<=1kb)	14	75598171	75643349	45179	2	10972	uc001xrm.1	0	ENSG00000170348	TMED10	transmembrane p24 trafficking protein 10
chr14	75760793	75761445	653	*	MACS_peak_2831	85.63	Promoter (<=1kb)	14	75761107	75763111	2005	1	731223	uc001xrp.3	0	NA	LINC01220	long intergenic non-protein coding RNA 1220
chr14	76448155	76448497	343	*	MACS_peak_2832	69.1	Promoter (<=1kb)	14	76429404	76448092	18689	2	7043	uc001xsd.3	-63	ENSG00000119699	TGFB3	transforming growth factor beta 3
chr14	76618692	76619279	588	*	MACS_peak_2833	63.94	Promoter (<=1kb)	14	76618265	76643033	24769	1	55668	uc001xsj.1	427	ENSG00000089916	GPATCH2L	G-patch domain containing 2 like
chr14	77278793	77279678	886	*	MACS_peak_2834	110.77	Promoter (<=1kb)	14	77253586	77279283	25698	2	23357	uc001xsv.3	0	ENSG00000013523	ANGEL1	angel homolog 1
chr14	77336049	77336617	569	*	MACS_peak_2835	54.04	3' UTR	14	77297546	77323818	26273	1	145497	uc010tvh.1	38503	ENSG00000100565	LRRC74A	leucine rich repeat containing 74A
chr14	77563853	77565004	1152	*	MACS_peak_2839	65.44	Promoter (<=1kb)	14	77564578	77583629	19052	1	85457	uc001xtc.1	0	ENSG00000198894	CIPC	CLOCK interacting pacemaker
chr14	77923875	77924440	566	*	MACS_peak_2840	51.35	Promoter (<=1kb)	14	77924373	77935069	10697	1	10598	uc010tvk.1	0	ENSG00000100591	AHSA1	activator of HSP90 ATPase activity 1
chr14	78059802	78060330	529	*	MACS_peak_2841	67.11	Intron (uc001xub.3/9517, intron 2 of 11)	14	77972340	78083110	110771	2	9517	uc001xub.3	22780	ENSG00000100596	SPTLC2	serine palmitoyltransferase long chain base subunit 2
chr14	78266280	78267096	817	*	MACS_peak_2842	97.03	Promoter (<=1kb)	14	78266426	78392304	125879	1	57143	uc010tvo.1	0	ENSG00000063761	ADCK1	aarF domain containing kinase 1
chr14	78305178	78305752	575	*	MACS_peak_2843	89.15	Intron (uc010tvo.1/57143, intron 3 of 8)	14	78325398	78390949	65552	1	57143	uc001xuk.1	-19646	ENSG00000063761	ADCK1	aarF domain containing kinase 1
chr14	78686174	78686690	517	*	MACS_peak_2844	50.23	Intron (uc001xum.2/9369, intron 1 of 20)	14	78636716	80334633	1697918	1	9369	uc001xum.2	49458	ENSG00000021645	NRXN3	neurexin 3
chr14	78968258	78968687	430	*	MACS_peak_2845	60.98	Intron (uc001xum.2/9369, intron 4 of 20)	14	78870074	80334633	1464560	1	9369	uc001xun.4	98184	ENSG00000021645	NRXN3	neurexin 3
chr14	79437038	79437347	310	*	MACS_peak_2846	92.78	Intron (uc001xum.2/9369, intron 13 of 20)	14	79745682	80334633	588952	1	9369	uc001xup.3	-308335	ENSG00000021645	NRXN3	neurexin 3
chr14	79949839	79950206	368	*	MACS_peak_2847	102.57	Intron (uc001xum.2/9369, intron 15 of 20)	14	79745682	80334633	588952	1	9369	uc010asw.4	204157	ENSG00000021645	NRXN3	neurexin 3
chr14	80665189	80665733	545	*	MACS_peak_2848	51.82	3' UTR	14	80677762	80921810	244049	1	100628307	uc001xuw.1	-12029	ENSG00000258766	DIO2-AS1	DIO2 antisense RNA 1
chr14	81687301	81687836	536	*	MACS_peak_2849	149.24	Promoter (<=1kb)	14	81641796	81687575	45780	2	2957	uc001xvg.2	0	ENSG00000165417	GTF2A1	general transcription factor IIA subunit 1
chr14	81936361	81936984	624	*	MACS_peak_2850	60.04	Downstream (<1kb)	14	81726994	81893748	166755	2	85439	uc001xvk.2	-42613	ENSG00000140022	STON2	stonin 2
chr14	85868897	85869288	392	*	MACS_peak_2859	68.19	Intron (uc031qpp.1/100996280, intron 1 of 2)	14	85860259	85886418	26160	1	100996280	uc031qpq.1	8638	ENSG00000259107	LINC00911	long intergenic non-protein coding RNA 911
chr14	88303327	88304389	1063	*	MACS_peak_2867	129.27	Exon (uc010tvw.1/2581, exon 14 of 14)	14	88304164	88446992	142829	2	2581	uc010tvw.1	142603	ENSG00000054983	GALC	galactosylceramidase
chr14	89883401	89883691	291	*	MACS_peak_2868	96.75	Promoter (<=1kb)	14	89622516	89883454	260939	2	1112	uc001xxn.4	0	ENSG00000053254	FOXN3	forkhead box N3
chr14	90762443	90762967	525	*	MACS_peak_2869	55.9	Intron (uc010atp.1/55051, intron 4 of 9)	14	90744398	90778887	34490	2	55051	uc010atp.1	15920	ENSG00000119720	NRDE2	NRDE-2, necessary for RNA interference, domain containing
chr14	91524163	91524968	806	*	MACS_peak_2870	79.33	Promoter (1-2kb)	14	91337167	91526478	189312	2	9252	uc010twi.1	1510	ENSG00000100784	RPS6KA5	ribosomal protein S6 kinase A5
chr14	91580188	91581133	946	*	MACS_peak_2871	156.82	Promoter (<=1kb)	14	91580357	91634065	53709	1	80017	uc010atu.3	0	ENSG00000133943	DGLUCY	D-glutamate cyclase
chr14	91586034	91586686	653	*	MACS_peak_2872	101.31	Intron (uc010atu.3/80017, intron 1 of 6)	14	91580979	91691703	110725	1	80017	uc001xze.2	5055	ENSG00000133943	DGLUCY	D-glutamate cyclase
chr14	91976576	91977128	553	*	MACS_peak_2873	57.13	Promoter (<=1kb)	14	91923956	91976644	52689	2	55671	uc001xzm.3	0	ENSG00000100796	PPP4R3A	protein phosphatase 4 regulatory subunit 3A
chr14	92118818	92119521	704	*	MACS_peak_2874	56.61	Intron (uc010aub.1/79820, intron 1 of 12)	14	92047118	92136316	89199	2	79820	uc010aub.1	16795	ENSG00000133962	CATSPERB	cation channel sperm associated auxiliary subunit beta
chr14	92588050	92588405	356	*	MACS_peak_2875	53.81	Promoter (<=1kb)	14	92582468	92588153	5686	2	4707	uc001yaf.3	0	ENSG00000183648	NDUFB1	NADH:ubiquinone oxidoreductase subunit B1
chr14	92966792	92967263	472	*	MACS_peak_2877	99.99	3' UTR	14	92980125	93155334	175210	1	79890	uc001yap.3	-12862	ENSG00000100599	RIN3	Ras and Rab interactor 3
chr14	93018107	93018833	727	*	MACS_peak_2878	268.49	Intron (uc001yap.3/79890, intron 1 of 9)	14	93042579	93155334	112756	1	79890	uc001yaq.3	-23746	ENSG00000100599	RIN3	Ras and Rab interactor 3
chr14	93439905	93440315	411	*	MACS_peak_2881	53.27	Intron (uc001ybe.2/3705, intron 5 of 10)	14	93389445	93401638	12194	1	1113	uc001ybd.4	50460	ENSG00000100604	CHGA	chromogranin A
chr14	93474717	93475496	780	*	MACS_peak_2882	184.85	Intron (uc001ybe.2/3705, intron 4 of 10)	14	93533797	93538478	4682	1	319085	uc001ybi.3	-58301	ENSG00000258730	ITPK1-AS1	ITPK1 antisense RNA 1
chr14	93502545	93503502	958	*	MACS_peak_2883	136.36	Intron (uc001ybe.2/3705, intron 3 of 10)	14	93533797	93538478	4682	1	319085	uc001ybi.3	-30295	ENSG00000258730	ITPK1-AS1	ITPK1 antisense RNA 1
chr14	93532511	93532854	344	*	MACS_peak_2884	51.48	Promoter (<=1kb)	14	93533797	93538478	4682	1	319085	uc001ybi.3	-943	ENSG00000258730	ITPK1-AS1	ITPK1 antisense RNA 1
chr14	94000078	94000442	365	*	MACS_peak_2886	51.48	Intron (uc001ybs.1/57578, intron 11 of 49)	14	93943904	94173689	229786	1	57578	uc001ybv.1	56174	ENSG00000133958	UNC79	unc-79 homolog, NALCN channel complex subunit
chr14	94425586	94426289	704	*	MACS_peak_2887	55.32	Promoter (1-2kb)	14	94400499	94423767	23269	2	51676	uc001ycc.2	-1819	ENSG00000100628	ASB2	ankyrin repeat and SOCS box containing 2
chr14	94546768	94547185	418	*	MACS_peak_2889	59.9	Promoter (<=1kb)	14	94517268	94547558	30291	2	57062	uc001ycj.3	373	ENSG00000089737	DDX24	DEAD-box helicase 24
chr14	94735390	94736047	658	*	MACS_peak_2891	175.26	Intron (uc001ycs.1/57718, intron 23 of 24)	14	94749650	94759361	9712	2	51156	uc001yct.3	23314	ENSG00000140093	SERPINA10	serpin family A member 10
chr14	95623114	95623406	293	*	MACS_peak_2892	58.73	Promoter (<=1kb)	14	95552565	95623759	71195	2	23405	uc001ydx.2	353	ENSG00000100697	DICER1	dicer 1, ribonuclease III
chr14	96000721	96001174	454	*	MACS_peak_2894	82.34	Promoter (<=1kb)	14	95999249	96001209	1961	2	283596	uc001yek.3	35	NA	SNHG10	small nucleolar RNA host gene 10
chr14	96828708	96829326	619	*	MACS_peak_2898	62.03	Promoter (<=1kb)	14	96747595	96829678	82084	2	55102	uc001yfi.3	352	ENSG00000066739	ATG2B	autophagy related 2B
chr14	100321464	100321892	429	*	MACS_peak_2902	63.85	Intron (uc010avt.1/2009, intron 2 of 10)	14	100259745	100408395	148651	1	2009	uc001ygs.3	61719	ENSG00000066629	EML1	echinoderm microtubule associated protein like 1
chr14	100841844	100842279	436	*	MACS_peak_2904	74.98	Promoter (<=1kb)	14	100800125	100841927	41803	2	7453	uc001yhg.2	0	ENSG00000140105	WARS	tryptophanyl-tRNA synthetase
chr14	100868877	100869347	471	*	MACS_peak_2905	52.51	Intron (uc010avx.3/79446, intron 2 of 6)	14	100848337	100996640	148304	1	79446	uc001yho.3	20540	ENSG00000176473	WDR25	WD repeat domain 25
chr14	100899048	100899516	469	*	MACS_peak_2906	139.16	Intron (uc010avx.3/79446, intron 2 of 6)	14	100848337	100996640	148304	1	79446	uc001yho.3	50711	ENSG00000176473	WDR25	WD repeat domain 25
chr14	102240287	102240973	687	*	MACS_peak_2908	107.86	Intron (uc001ykj.4/5527, intron 2 of 4)	14	102228135	102394328	166194	1	5527	uc010txr.2	12152	ENSG00000078304	PPP2R5C	protein phosphatase 2 regulatory subunit B'gamma
chr14	102728990	102729865	876	*	MACS_peak_2910	88.92	Intron (uc001ylm.4/5891, intron 4 of 11)	14	102695158	102706958	11801	2	5891	uc001yll.4	-22032	ENSG00000080823	MOK	MOK protein kinase
chr14	102810666	102811280	615	*	MACS_peak_2911	104.66	Exon (uc001ylu.1/51550, exon 5 of 6)	14	102801270	102809511	8242	1	55778	uc001ylt.3	9396	ENSG00000022976	ZNF839	zinc finger protein 839
chr14	102856235	102856680	446	*	MACS_peak_2912	60.07	Intron (uc010txw.2/9895, intron 2 of 5)	14	102829300	102968818	139519	1	9895	uc010txx.2	26935	ENSG00000196663	TECPR2	tectonin beta-propeller repeat containing 2
chr14	103291193	103291517	325	*	MACS_peak_2913	67.26	Intron (uc001ymc.2/7187, intron 1 of 11)	14	103243816	103377837	134022	1	7187	uc010txy.2	47377	ENSG00000131323	TRAF3	TNF receptor associated factor 3
chr14	103359790	103360224	435	*	MACS_peak_2914	92.58	Intron (uc001ymc.2/7187, intron 9 of 11)	14	103388993	103397179	8187	1	81693	uc001ymg.4	-28769	ENSG00000166126	AMN	amnion associated transmembrane protein
chr14	103417128	103417726	599	*	MACS_peak_2915	68.41	Intron (uc001ymi.1/9578, intron 24 of 36)	14	103410228	103430987	20760	2	9578	uc001ymj.1	13261	ENSG00000198752	CDC42BPB	CDC42 binding protein kinase beta
chr14	104060681	104061161	481	*	MACS_peak_2917	95.15	Intron (uc010tyd.1/3831, intron 4 of 17)	14	104029299	104057236	27938	1	84334	uc010tyc.2	31382	ENSG00000256053	APOPT1	apoptogenic 1, mitochondrial
chr14	104073144	104073732	589	*	MACS_peak_2918	116.82	Intron (uc010tyd.1/3831, intron 4 of 17)	14	104095525	104151653	56129	1	3831	uc010tye.1	-21793	ENSG00000126214	KLC1	kinesin light chain 1
chr14	104143388	104144095	708	*	MACS_peak_2919	65.28	Promoter (1-2kb)	14	104142026	104167888	25863	1	3831	uc001yns.3	1362	ENSG00000126214	KLC1	kinesin light chain 1
chr14	104376655	104377000	346	*	MACS_peak_2920	56.41	Downstream (1-2kb)	14	104378625	104387903	9279	2	9556	uc001yoi.4	10903	ENSG00000156411	C14orf2	chromosome 14 open reading frame 2
chr14	105146952	105147815	864	*	MACS_peak_2922	74	Promoter (2-3kb)	14	105144031	105144086	56	2	100616300	uc021sek.1	-2866	ENSG00000265291	MIR4710	microRNA 4710
chr14	105262814	105263077	264	*	MACS_peak_2923	82.77	Promoter (<=1kb)	14	105235687	105262080	26394	2	207	uc001ypn.3	-734	ENSG00000142208	AKT1	AKT serine/threonine kinase 1
chr14	106954464	106955261	798	*	MACS_peak_2928	61.02	Exon (uc031qqx.1/uc031qqx.1, exon 326 of 5065)	14	106938455	106951529	13075	1	338005	uc001ysy.2	16009	ENSG00000270816	LINC00221	long intergenic non-protein coding RNA 221
chr15	22467567	22467842	276	*	MACS_peak_2929	79.27	Intron (uc001yuj.2/uc001yuj.2, intron 7 of 12)	15	22413462	22414395	934	1	390539	uc001yuf.3	54105	ENSG00000259435	OR4N3P	olfactory receptor family 4 subfamily N member 3 pseudogene
chr15	22984593	22985126	534	*	MACS_peak_2930	67.39	Intron (uc001yus.3/23191, intron 23 of 30)	15	22967628	23003603	35976	1	23191	uc001yuv.3	16965	ENSG00000273749	CYFIP1	cytoplasmic FMR1 interacting protein 1
chr15	23823595	23823921	327	*	MACS_peak_2931	106.56	Intron (uc001ywi.3/uc001ywi.3, intron 1 of 1)	15	23810454	23813166	2713	1	7681	uc001ywh.4	13141	ENSG00000179455	MKRN3	makorin ring finger protein 3
chr15	25676980	25677478	499	*	MACS_peak_2932	66.45	Intron (uc001zaq.3/7337, intron 1 of 13)	15	25582396	25684175	101780	2	7337	uc001zaq.3	6697	ENSG00000114062	UBE3A	ubiquitin protein ligase E3A
chr15	26176958	26177595	638	*	MACS_peak_2935	90.62	Intron (uc021sgd.1/100128714, intron 1 of 4)	15	26147507	26298267	150761	1	100128714	uc021sgd.1	29451	ENSG00000206187	LINC02346	long intergenic non-protein coding RNA 2346
chr15	27382337	27382930	594	*	MACS_peak_2938	74.78	Intron (uc001zbf.4/2567, intron 3 of 5)	15	27216429	27778373	561945	1	2567	uc001zbg.2	165908	ENSG00000182256	GABRG3	gamma-aminobutyric acid type A receptor gamma3 subunit
chr15	28365259	28365823	565	*	MACS_peak_2939	50.41	Promoter (2-3kb)	15	28356183	28362697	6515	2	8924	uc001zbi.4	-2562	ENSG00000128731	HERC2	HECT and RLD domain containing E3 ubiquitin protein ligase 2
chr15	29269417	29270108	692	*	MACS_peak_2940	101.09	Intron (uc010uas.1/321, intron 3 of 4)	15	29213843	29410516	196674	1	321	uc001zcl.3	55574	ENSG00000034053	APBA2	amyloid beta precursor protein binding family A member 2
chr15	29433764	29434045	282	*	MACS_peak_2941	65.95	Intron (uc001zcn.2/23359, intron 2 of 7)	15	29412455	29488891	76437	2	23359	uc001zcn.2	54846	ENSG00000104059	FAM189A1	family with sequence similarity 189 member A1
chr15	30096973	30097567	595	*	MACS_peak_2942	78.09	Intron (uc001zcq.3/7082, intron 2 of 27)	15	29992357	30092905	100549	2	7082	uc010azl.3	-4068	ENSG00000104067	TJP1	tight junction protein 1
chr15	31214604	31215354	751	*	MACS_peak_2946	95.16	Intron (uc001zfe.3/22909, intron 9 of 15)	15	31196076	31235310	39235	1	22909	uc001zff.3	18528	ENSG00000198690	FAN1	FANCD2 and FANCI associated nuclease 1
chr15	31255959	31256578	620	*	MACS_peak_2947	102.39	Intron (uc001zfh.1/54893, intron 6 of 15)	15	31253084	31267213	14130	2	54893	uc010ubl.1	10635	ENSG00000166912	MTMR10	myotubularin related protein 10
chr15	31393491	31394598	1108	*	MACS_peak_2948	210.39	Promoter (<=1kb)	15	31293264	31393929	100666	2	4308	uc001zfm.3	0	ENSG00000134160	TRPM1	transient receptor potential cation channel subfamily M member 1
chr15	32962498	32962818	321	*	MACS_peak_2950	164.91	Exon (uc001zhb.2/uc001zhb.2, exon 1 of 1)	15	32933870	32989298	55429	1	6447	uc001zha.2	28628	ENSG00000166922	SCG5	secretogranin V
chr15	33110977	33111614	638	*	MACS_peak_2951	58.76	Intron (uc001zhf.5/342184, intron 13 of 16)	15	33010205	33026870	16666	1	26585	uc010uby.2	100772	ENSG00000166923	GREM1	gremlin 1, DAN family BMP antagonist
chr15	33144920	33145364	445	*	MACS_peak_2952	68.61	Intron (uc001zhf.5/342184, intron 13 of 16)	15	33010205	33026870	16666	1	26585	uc010uby.2	134715	ENSG00000166923	GREM1	gremlin 1, DAN family BMP antagonist
chr15	33363721	33364040	320	*	MACS_peak_2953	51	Intron (uc031qrh.1/342184, intron 5 of 20)	15	33356627	33360233	3607	2	342184	uc001zhg.3	-3488	ENSG00000248905	FMN1	formin 1
chr15	33384249	33385018	770	*	MACS_peak_2954	61.48	Intron (uc031qrh.1/342184, intron 4 of 20)	15	33356627	33360233	3607	2	342184	uc001zhg.3	-24016	ENSG00000248905	FMN1	formin 1
chr15	33446782	33447537	756	*	MACS_peak_2955	273.91	5' UTR	15	33057745	33486934	429190	2	342184	uc031qrh.1	39397	ENSG00000248905	FMN1	formin 1
chr15	34093720	34094291	572	*	MACS_peak_2956	56.17	Exon (uc001zhi.3/6263, exon 69 of 104)	15	34261089	34357287	96199	1	1133	uc001zhk.1	-166798	ENSG00000184984	CHRM5	cholinergic receptor muscarinic 5
chr15	34123895	34124381	487	*	MACS_peak_2957	60.74	Intron (uc001zhi.3/6263, intron 86 of 103)	15	34261089	34357287	96199	1	1133	uc001zhk.1	-136708	ENSG00000184984	CHRM5	cholinergic receptor muscarinic 5
chr15	34635157	34635582	426	*	MACS_peak_2958	151.2	Promoter (<=1kb)	15	34635516	34649931	14416	1	256646	uc010ucc.2	0	ENSG00000184507	NUTM1	NUT midline carcinoma family member 1
chr15	35787324	35787861	538	*	MACS_peak_2962	66.56	Intron (uc001zja.3/89978, intron 3 of 8)	15	35838396	36151202	312807	1	100507466	uc001zjc.3	-50535	ENSG00000248079	DPH6-AS1	DPH6 antisense RNA 1 (head to head)
chr15	36100799	36101332	534	*	MACS_peak_2963	59.27	Intron (uc001zjc.3/100507466, intron 2 of 2)	15	36219057	36219124	68	1	100616293	uc021sja.1	-117725	ENSG00000265098	MIR4510	microRNA 4510
chr15	37349899	37350441	543	*	MACS_peak_2964	66.79	Intron (uc001zjl.3/4212, intron 6 of 11)	15	37183222	37390562	207341	2	4212	uc001zjl.3	40121	ENSG00000134138	MEIS2	Meis homeobox 2
chr15	38543942	38544628	687	*	MACS_peak_2966	69.27	Promoter (<=1kb)	15	38545052	38649450	104399	1	161742	uc001zka.4	-424	ENSG00000166068	SPRED1	sprouty related EVH1 domain containing 1
chr15	40390499	40391419	921	*	MACS_peak_2971	114.41	Intron (uc001zkt.4/90427, intron 2 of 2)	15	40380091	40398292	18202	2	90427	uc001zkt.4	6873	ENSG00000104081	BMF	Bcl2 modifying factor
chr15	40631078	40631449	372	*	MACS_peak_2972	55.18	Promoter (<=1kb)	15	40623653	40630334	6682	2	388115	uc010ucn.2	-744	ENSG00000188549	CCDC9B	coiled-coil domain containing 9B
chr15	40857249	40857810	562	*	MACS_peak_2973	54.34	Promoter (<=1kb)	15	40823538	40857252	33715	2	90416	uc001zly.3	0	ENSG00000128891	CCDC32	coiled-coil domain containing 32
chr15	40987048	40987611	564	*	MACS_peak_2974	63.12	Promoter (<=1kb)	15	40985953	40987303	1351	2	100505648	uc001zmh.2	0	ENSG00000245849	RAD51-AS1	RAD51 antisense RNA 1 (head to head)
chr15	41186547	41187147	601	*	MACS_peak_2975	60.87	Promoter (<=1kb)	15	41186628	41196173	9546	1	57617	uc001zne.3	0	ENSG00000104142	VPS18	VPS18, CORVET/HOPS core subunit
chr15	41293606	41294222	617	*	MACS_peak_2976	135.04	Intron (uc001zni.3/54617, intron 28 of 35)	15	41267988	41280172	12185	2	54617	uc021sjj.1	-13434	ENSG00000128908	INO80	INO80 complex subunit
chr15	41522842	41523460	619	*	MACS_peak_2977	56.7	Promoter (<=1kb)	15	41523437	41574083	50647	1	11261	uc001znl.3	0	ENSG00000187446	CHP1	calcineurin like EF-hand protein 1
chr15	41533335	41533796	462	*	MACS_peak_2978	110.37	Intron (uc001znl.3/11261, intron 1 of 6)	15	41523437	41574083	50647	1	11261	uc021sjl.1	9898	ENSG00000187446	CHP1	calcineurin like EF-hand protein 1
chr15	41708759	41709181	423	*	MACS_peak_2979	55.15	Promoter (<=1kb)	15	41709302	41775761	66460	1	23168	uc001zny.3	-121	ENSG00000137815	RTF1	RTF1 homolog, Paf1/RNA polymerase II complex component
chr15	41913436	41914515	1080	*	MACS_peak_2980	109.21	Promoter (<=1kb)	15	41913764	42005694	91931	1	23269	uc001zog.1	0	ENSG00000174197	MGA	MGA, MAX dimerization protein
chr15	41948343	41948745	403	*	MACS_peak_2981	59.27	Intron (uc001zog.1/23269, intron 1 of 8)	15	41952610	42062141	109532	1	23269	uc010ucy.2	-3865	ENSG00000174197	MGA	MGA, MAX dimerization protein
chr15	41953694	41954348	655	*	MACS_peak_2982	135.42	Promoter (1-2kb)	15	41952610	42062141	109532	1	23269	uc010ucz.2	1084	ENSG00000174197	MGA	MGA, MAX dimerization protein
chr15	42208798	42209130	333	*	MACS_peak_2983	101.19	Intron (uc001zot.3/30844, intron 4 of 5)	15	42140344	42186275	45932	2	51332	uc001zos.4	-22523	ENSG00000137877	SPTBN5	spectrin beta, non-erythrocytic 5
chr15	42611390	42611971	582	*	MACS_peak_2984	69.45	Intron (uc001zpi.3/2595, intron 10 of 23)	15	42640301	42704515	64215	1	825	uc001zpk.1	-28330	ENSG00000092529	CAPN3	calpain 3
chr15	42684692	42685075	384	*	MACS_peak_2985	99.16	Exon (uc001zpk.1/825, exon 12 of 28)	15	42694588	42704515	9928	1	825	uc001zpq.1	-9513	ENSG00000092529	CAPN3	calpain 3
chr15	42696577	42697298	722	*	MACS_peak_2986	218.09	Promoter (<=1kb)	15	42696977	42704360	7384	1	825	uc010bcv.1	0	ENSG00000092529	CAPN3	calpain 3
chr15	42711585	42712046	462	*	MACS_peak_2987	117.98	Intron (uc001zpu.3/64397, intron 15 of 16)	15	42696977	42704515	7539	1	825	uc001zpt.1	14608	ENSG00000092529	CAPN3	calpain 3
chr15	43360041	43360514	474	*	MACS_peak_2989	55.25	Exon (uc001zqq.3/197131, exon 6 of 47)	15	43235098	43398286	163189	2	197131	uc001zqq.3	37772	ENSG00000159459	UBR1	ubiquitin protein ligase E3 component n-recognin 1
chr15	43398104	43398431	328	*	MACS_peak_2990	66.25	Promoter (<=1kb)	15	43235098	43398286	163189	2	197131	uc001zqq.3	0	ENSG00000159459	UBR1	ubiquitin protein ligase E3 component n-recognin 1
chr15	43653014	43653535	522	*	MACS_peak_2991	56.16	3' UTR	15	43650370	43661336	10967	2	146050	uc001zrj.1	7801	ENSG00000140265	ZSCAN29	zinc finger and SCAN domain containing 29
chr15	43899196	43899400	205	*	MACS_peak_2992	128.05	Intron (uc001zse.3/161497, intron 3 of 12)	15	43891761	43903223	11463	2	161497	uc001zse.3	3823	ENSG00000242866	STRC	stereocilin
chr15	43914270	43914659	390	*	MACS_peak_2993	53.81	Intron (uc010udz.1/161497, intron 1 of 8)	15	43891761	43910998	19238	2	161497	uc010bdl.3	-3272	ENSG00000242866	STRC	stereocilin
chr15	44083715	44084727	1013	*	MACS_peak_2994	77.99	Promoter (<=1kb)	15	44084174	44094769	10596	1	100529067	uc001ztb.3	0	NA	SERF2-C15ORF63	SERF2-C15orf63 readthrough
chr15	44203364	44204082	719	*	MACS_peak_2995	172.35	Promoter (1-2kb)	15	44165474	44202177	36704	2	84978	uc001ztj.1	-1187	ENSG00000171877	FRMD5	FERM domain containing 5
chr15	44395087	44395532	446	*	MACS_peak_2996	92.25	Intron (uc001ztk.1/84978, intron 1 of 15)	15	44165474	44486644	321171	2	84978	uc001ztk.1	91112	ENSG00000171877	FRMD5	FERM domain containing 5
chr15	44481077	44481554	478	*	MACS_peak_2997	62.58	Intron (uc001ztk.1/84978, intron 1 of 15)	15	44165474	44486644	321171	2	84978	uc001ztk.1	5090	ENSG00000171877	FRMD5	FERM domain containing 5
chr15	44955822	44956126	305	*	MACS_peak_2998	89.94	Promoter (<=1kb)	15	44854894	44955876	100983	2	80208	uc001ztx.3	0	ENSG00000104133	SPG11	SPG11, spatacsin vesicle trafficking associated
chr15	45003290	45004085	796	*	MACS_peak_2999	60.4	Promoter (<=1kb)	15	44966961	45003514	36554	2	197135	uc031qrq.1	0	ENSG00000229474	PATL2	PAT1 homolog 2
chr15	45020486	45020889	404	*	MACS_peak_3000	59.2	Promoter (<=1kb)	15	45021219	45060025	38807	1	140691	uc001zuf.2	-330	ENSG00000185880	TRIM69	tripartite motif containing 69
chr15	45748780	45749223	444	*	MACS_peak_3002	107.47	Intron (uc001zvi.1/uc001zvi.1, intron 1 of 3)	15	45725248	45725327	80	1	100126311	uc021skp.1	23532	ENSG00000284386	MIR147B	microRNA 147b
chr15	45879064	45879693	630	*	MACS_peak_3003	106.34	Promoter (<=1kb)	15	45879417	45901909	22493	1	26258	uc001zvq.3	0	ENSG00000104164	BLOC1S6	biogenesis of lysosomal organelles complex 1 subunit 6
chr15	47675935	47676532	598	*	MACS_peak_3006	52.25	Intron (uc001zvw.3/80031, intron 1 of 19)	15	47476403	48066420	590018	1	80031	uc001zvw.3	199532	ENSG00000137872	SEMA6D	semaphorin 6D
chr15	47714891	47715419	529	*	MACS_peak_3007	52.55	Intron (uc001zvw.3/80031, intron 2 of 19)	15	47476403	48066420	590018	1	80031	uc001zvw.3	238488	ENSG00000137872	SEMA6D	semaphorin 6D
chr15	47723632	47724163	532	*	MACS_peak_3008	105.14	Intron (uc001zvw.3/80031, intron 2 of 19)	15	47476403	48066420	590018	1	80031	uc001zvw.3	247229	ENSG00000137872	SEMA6D	semaphorin 6D
chr15	48413016	48413359	344	*	MACS_peak_3012	53.81	Promoter (<=1kb)	15	48413169	48416873	3705	1	283652	uc001zwd.3	0	ENSG00000188467	SLC24A5	solute carrier family 24 member 5
chr15	48623898	48624323	426	*	MACS_peak_3013	64.58	Promoter (<=1kb)	15	48624365	48635570	11206	1	1854	uc001zww.3	-42	ENSG00000128951	DUT	deoxyuridine triphosphatase
chr15	49462157	49462970	814	*	MACS_peak_3016	60.32	Promoter (<=1kb)	15	49462422	49622002	159581	1	2585	uc001zxj.1	0	ENSG00000156958	GALK2	galactokinase 2
chr15	49635524	49636124	601	*	MACS_peak_3017	54.78	Intron (uc001zxl.2/196951, intron 13 of 15)	15	49715375	49779523	64149	1	2252	uc001zxn.3	-79251	ENSG00000140285	FGF7	fibroblast growth factor 7
chr15	50295913	50296271	359	*	MACS_peak_3019	126.02	Intron (uc010ber.3/79895, intron 8 of 28)	15	50187089	50194480	7392	2	79895	uc001zxv.1	-101433	ENSG00000104043	ATP8B4	ATPase phospholipid transporting 8B4 (putative)
chr15	51896585	51896800	216	*	MACS_peak_3020	121.78	Intron (uc002abf.3/23312, intron 1 of 42)	15	51739921	51914967	175047	2	23312	uc002abf.3	18167	ENSG00000104093	DMXL2	Dmx like 2
chr15	52018575	52018870	296	*	MACS_peak_3021	76.64	Intron (uc002abi.3/256586, intron 1 of 2)	15	52015261	52030320	15060	2	256586	uc002abi.3	11450	ENSG00000140280	LYSMD2	LysM domain containing 2
chr15	52311038	52311526	489	*	MACS_peak_3022	99.76	Promoter (<=1kb)	15	52311411	52358462	47052	1	5597	uc002abp.3	0	ENSG00000069956	MAPK6	mitogen-activated protein kinase 6
chr15	52505523	52505895	373	*	MACS_peak_3024	53.81	Intron (uc010bff.3/55930, intron 33 of 40)	15	52413123	52483565	70443	2	10681	uc002abt.1	-21958	ENSG00000069966	GNB5	G protein subunit beta 5
chr15	52548649	52548989	341	*	MACS_peak_3025	92.79	Exon (uc010bff.3/55930, exon 11 of 41)	15	52569314	52569397	84	2	100302202	uc021smp.1	20408	ENSG00000221052	MIR1266	microRNA 1266
chr15	52709558	52710230	673	*	MACS_peak_3026	69.16	Intron (uc002abx.3/4644, intron 4 of 39)	15	52630007	52643678	13672	2	4644	uc002acc.1	-65880	ENSG00000197535	MYO5A	myosin VA
chr15	52777385	52777807	423	*	MACS_peak_3027	81.12	Intron (uc002abx.3/4644, intron 1 of 39)	15	52599480	52821247	221768	2	4644	uc002abx.3	43440	ENSG00000197535	MYO5A	myosin VA
chr15	52783709	52784006	298	*	MACS_peak_3028	83	Intron (uc002abx.3/4644, intron 1 of 39)	15	52599480	52821247	221768	2	4644	uc002abx.3	37241	ENSG00000197535	MYO5A	myosin VA
chr15	55562516	55562978	463	*	MACS_peak_3032	131.65	Promoter (<=1kb)	15	55495164	55562592	67429	2	5873	uc002acp.3	0	ENSG00000069974	RAB27A	RAB27A, member RAS oncogene family
chr15	55922809	55923410	602	*	MACS_peak_3033	58.67	Intron (uc002adg.3/283659, intron 15 of 19)	15	55838221	55881050	42830	2	26108	uc002adf.1	-41759	ENSG00000171016	PYGO1	pygopus family PHD finger 1
chr15	57179709	57180159	451	*	MACS_peak_3034	56.48	Exon (uc002adz.1/145783, exon 4 of 4)	15	57210323	57579190	368868	1	6938	uc010ugm.1	-30164	ENSG00000140262	TCF12	transcription factor 12
chr15	57311706	57312246	541	*	MACS_peak_3035	50.38	Intron (uc010ugm.1/6938, intron 3 of 18)	15	57210833	57580714	369882	1	6938	uc010bfs.3	100873	ENSG00000140262	TCF12	transcription factor 12
chr15	57998423	57999373	951	*	MACS_peak_3037	90.03	Promoter (<=1kb)	15	57998901	58001556	2656	1	81488	uc002aev.1	0	ENSG00000255529	POLR2M	RNA polymerase II subunit M
chr15	58746510	58747110	601	*	MACS_peak_3040	171.76	Intron (uc010bfz.1/3990, intron 2 of 8)	15	58724192	58861073	136882	1	3990	uc010ugy.2	22318	ENSG00000166035	LIPC	lipase C, hepatic type
chr15	58898115	58898485	371	*	MACS_peak_3041	76.11	Intron (uc002afd.1/102, intron 14 of 15)	15	58901357	58913820	12464	2	102	uc002aff.1	15335	ENSG00000137845	ADAM10	ADAM metallopeptidase domain 10
chr15	59023946	59024368	423	*	MACS_peak_3042	94.27	Intron (uc002afd.1/102, intron 1 of 15)	15	58888510	59042177	153668	2	102	uc002afd.1	17809	ENSG00000137845	ADAM10	ADAM metallopeptidase domain 10
chr15	59041640	59042352	713	*	MACS_peak_3043	62.66	Promoter (<=1kb)	15	58888510	59042177	153668	2	102	uc002afd.1	0	ENSG00000137845	ADAM10	ADAM metallopeptidase domain 10
chr15	59492296	59492879	584	*	MACS_peak_3044	80.55	Intron (uc002aga.4/4643, intron 16 of 27)	15	59499015	59500785	1771	1	92483	uc002agb.4	-6136	ENSG00000171989	LDHAL6B	lactate dehydrogenase A like 6B
chr15	60663348	60663978	631	*	MACS_peak_3047	67.9	Intron (uc002agk.3/302, intron 4 of 13)	15	60639350	60690185	50836	2	302	uc002agk.3	26207	ENSG00000182718	ANXA2	annexin A2
chr15	60683311	60684084	774	*	MACS_peak_3048	59.27	Intron (uc002agk.3/302, intron 2 of 13)	15	60639350	60690185	50836	2	302	uc002agk.3	6101	ENSG00000182718	ANXA2	annexin A2
chr15	63428070	63428501	432	*	MACS_peak_3051	60.86	Intron (uc002alw.3/114294, intron 5 of 5)	15	63413999	63434260	20262	1	114294	uc002alw.3	14071	ENSG00000103642	LACTB	lactamase beta
chr15	63615816	63616795	980	*	MACS_peak_3052	67.81	3' UTR	15	63569749	63601325	31577	1	83464	uc010bgq.3	46067	ENSG00000138613	APH1B	aph-1 homolog B, gamma-secretase subunit
chr15	63640763	63641137	375	*	MACS_peak_3053	56.41	Intron (uc002amc.3/771, intron 2 of 10)	15	63615730	63674075	58346	2	771	uc002amc.3	32938	ENSG00000074410	CA12	carbonic anhydrase 12
chr15	63845565	63846044	480	*	MACS_peak_3054	62.45	5' UTR	15	63829224	63886839	57616	1	9960	uc002ami.4	16341	ENSG00000140455	USP3	ubiquitin specific peptidase 3
chr15	64813991	64814376	386	*	MACS_peak_3055	79.27	Intron (uc002ann.3/23060, intron 1 of 8)	15	64791619	64978266	186648	1	23060	uc002ann.3	22372	ENSG00000180357	ZNF609	zinc finger protein 609
chr15	65148918	65149492	575	*	MACS_peak_3056	79.61	Intron (uc002anv.3/80301, intron 3 of 5)	15	65134082	65160201	26120	1	80301	uc002anw.3	14836	ENSG00000241839	PLEKHO2	pleckstrin homology domain containing O2
chr15	65281669	65282181	513	*	MACS_peak_3058	121.25	Promoter (<=1kb)	15	65255363	65281812	26450	2	51324	uc002aod.3	0	ENSG00000090487	SPG21	SPG21, maspardin
chr15	65407491	65408420	930	*	MACS_peak_3059	115.04	Promoter (<=1kb)	15	65385342	65407535	22194	2	390595	uc002aok.3	0	ENSG00000246922	UBAP1L	ubiquitin associated protein 1 like
chr15	66084535	66084988	454	*	MACS_peak_3060	62.02	Promoter (<=1kb)	15	65952957	66084631	131675	2	10260	uc002aph.3	0	ENSG00000174485	DENND4A	DENN domain containing 4A
chr15	66315605	66316035	431	*	MACS_peak_3061	52.73	Intron (uc002apl.2/84465, intron 3 of 20)	15	66332571	66332670	100	1	100422905	uc021spd.1	-16536	ENSG00000263512	MIR4311	microRNA 4311
chr15	67058168	67058644	477	*	MACS_peak_3062	88.79	Intron (uc002aqf.3/4091, intron 3 of 3)	15	67000930	67074337	73408	1	4091	uc002aqg.3	57238	ENSG00000137834	SMAD6	SMAD family member 6
chr15	67379551	67380078	528	*	MACS_peak_3064	59.4	Intron (uc002aqj.3/4088, intron 1 of 8)	15	67358195	67487533	129339	1	4088	uc002aqj.3	21356	ENSG00000166949	SMAD3	SMAD family member 3
chr15	67804583	67804998	416	*	MACS_peak_3065	81.63	Intron (uc002aqr.2/100506686, intron 2 of 5)	15	67807260	67813311	6052	2	100506686	uc021spg.1	8313	ENSG00000259673	IQCH-AS1	IQCH antisense RNA 1
chr15	67813639	67814151	513	*	MACS_peak_3066	83.69	Promoter (<=1kb)	15	67695949	67814182	118234	2	100506686	uc002aqr.2	31	ENSG00000259673	IQCH-AS1	IQCH antisense RNA 1
chr15	68574048	68574597	550	*	MACS_peak_3069	64.59	Intron (uc002arg.3/10116, intron 1 of 1)	15	68570141	68583640	13500	1	10116	uc002arg.3	3907	ENSG00000169018	FEM1B	fem-1 homolog B
chr15	68925410	68926157	748	*	MACS_peak_3070	88.29	Promoter (1-2kb)	15	68924327	69020144	95818	1	10391	uc010bic.3	1083	ENSG00000103647	CORO2B	coronin 2B
chr15	69295976	69296583	608	*	MACS_peak_3071	57.26	Intron (uc021spl.1/100313884, intron 1 of 1)	15	69307034	69349501	42468	1	79400	uc002arr.2	-10451	ENSG00000255346	NOX5	NADPH oxidase 5
chr15	69378973	69379789	817	*	MACS_peak_3072	51.6	Intron (uc021spl.1/100313884, intron 1 of 1)	15	69373226	69388163	14938	1	283673	uc010big.3	5747	ENSG00000212766	EWSAT1	Ewing sarcoma associated transcript 1
chr15	69590820	69591225	406	*	MACS_peak_3073	59.08	Promoter (<=1kb)	15	69591294	69699976	108683	1	54852	uc002arz.2	-69	ENSG00000137819	PAQR5	progestin and adipoQ receptor family member 5
chr15	69754893	69755550	658	*	MACS_peak_3074	66.54	Promoter (<=1kb)	15	69755446	69857866	102421	1	145837	uc002asf.1	0	NA	DRAIC	downregulated RNA in cancer, inhibitor of cell invasion and migration
chr15	70389798	70390314	517	*	MACS_peak_3076	76.39	Promoter (<=1kb)	15	70340543	70390256	49714	2	7090	uc002asm.2	0	ENSG00000140332	TLE3	transducin like enhancer of split 3
chr15	71009643	71010018	376	*	MACS_peak_3079	51.48	Intron (uc002asr.3/55075, intron 1 of 18)	15	70959063	70994620	35558	2	55075	uc010bin.1	-15023	ENSG00000137831	UACA	uveal autoantigen with coiled-coil domains and ankyrin repeats
chr15	72395573	72396042	470	*	MACS_peak_3081	76.4	Intron (uc002atl.5/4649, intron 1 of 41)	15	72406599	72433311	26713	1	123228	uc021spq.1	-10557	ENSG00000166192	SENP8	SUMO/sentrin peptidase family member, NEDD8 specific
chr15	72495768	72496068	301	*	MACS_peak_3082	66.25	Promoter (<=1kb)	15	72491370	72495005	3636	2	5315	uc002atr.1	-763	ENSG00000067225	PKM	pyruvate kinase M1/2
chr15	72668081	72668927	847	*	MACS_peak_3083	106.87	Promoter (<=1kb)	15	72635778	72668520	32743	2	3073	uc002aun.4	0	ENSG00000213614	HEXA	hexosaminidase subunit alpha
chr15	72766125	72766563	439	*	MACS_peak_3084	54.24	Promoter (<=1kb)	15	72766667	72878896	112230	1	25820	uc002aut.4	-104	ENSG00000166233	ARIH1	ariadne RBR E3 ubiquitin protein ligase 1
chr15	74035364	74035784	421	*	MACS_peak_3085	57.42	Intron (uc002avy.3/388135, intron 1 of 1)	15	74032141	74043816	11676	2	388135	uc002avy.3	8032	ENSG00000205363	C15orf59	chromosome 15 open reading frame 59
chr15	74243247	74243890	644	*	MACS_peak_3086	70.28	Intron (uc002awc.1/4016, intron 6 of 6)	15	74209809	74220589	10781	2	100287616	uc021sqa.1	-22658	ENSG00000261801	LOXL1-AS1	LOXL1 antisense RNA 1
chr15	74587810	74588328	519	*	MACS_peak_3089	50.14	Exon (uc002axo.4/80125, exon 11 of 19)	15	74610931	74627751	16821	1	80125	uc002axq.4	-22603	ENSG00000140481	CCDC33	coiled-coil domain containing 33
chr15	75135492	75136150	659	*	MACS_peak_3092	64.98	Promoter (<=1kb)	15	75128459	75135552	7094	2	25989	uc002ayv.2	0	ENSG00000140474	ULK3	unc-51 like kinase 3
chr15	75158407	75158977	571	*	MACS_peak_3093	56.91	Intron (uc002azb.1/10066, intron 1 of 8)	15	75137197	75165670	28474	2	10066	uc002azb.1	6693	ENSG00000140497	SCAMP2	secretory carrier membrane protein 2
chr15	75321548	75322080	533	*	MACS_peak_3094	51.18	Intron (uc002azo.3/60490, intron 2 of 5)	15	75315927	75343067	27141	1	60490	uc002azo.3	5621	ENSG00000138621	PPCDC	phosphopantothenoylcysteine decarboxylase
chr15	75335946	75336661	716	*	MACS_peak_3095	52.04	Intron (uc002azo.3/60490, intron 3 of 5)	15	75315927	75343067	27141	1	60490	uc002azo.3	20019	ENSG00000138621	PPCDC	phosphopantothenoylcysteine decarboxylase
[truncated: 4,179 more rows]

## Sheet: BoundECM
MITF bound ECM genes in COLO829
	seqnames	start	end	width	strand	V4	V5	annotation	geneChr	geneStart	geneEnd	geneLength	geneStrand	geneId	transcriptId	distanceToTSS	ENSEMBL	SYMBOL	GENENAME
148	chr1	26354725	26355736	1012	*	MACS_peak_148	126.71	Exon (uc001blf.3/2134, exon 2 of 11)	1	26348271	26362954	14684	1	2134	uc001blf.3	6454	ENSG00000158008	EXTL1	exostosin like glycosyltransferase 1
565	chr1	162660524	162661006	483	*	MACS_peak_565	68.68	Intron (uc001gcf.3/4921, intron 2 of 18)	1	162602228	162750247	148020	1	4921	uc001gcg.3	58296	ENSG00000162733	DDR2	discoidin domain receptor tyrosine kinase 2
637	chr1	182991172	182992032	861	*	MACS_peak_637	107.19	Promoter (<=1kb)	1	182992595	183074191	81597	1	3915	uc001gpx.3	-563	ENSG00000135862	LAMC1	laminin subunit gamma 1
638	chr1	183063198	183063821	624	*	MACS_peak_638	70.06	Intron (uc001gpx.3/3915, intron 1 of 1)	1	182992595	183114727	122133	1	3915	uc001gpy.4	70603	ENSG00000135862	LAMC1	laminin subunit gamma 1
743	chr1	209824692	209825018	327	*	MACS_peak_743	77.72	Promoter (<=1kb)	1	209788218	209824679	36462	2	3914	uc001hhg.3	-13	ENSG00000196878	LAMB3	laminin subunit beta 3
843	chr1	230249165	230250123	959	*	MACS_peak_843	186.83	Intron (uc010pvy.1/2590, intron 1 of 15)	1	230202956	230417875	214920	1	2590	uc010pwa.1	46209	ENSG00000143641	GALNT2	polypeptide N-acetylgalactosaminyltransferase 2
905	chr1	243876879	243877167	289	*	MACS_peak_905	66.25	Intron (uc001hzz.1/10000, intron 1 of 13)	1	243651535	244006584	355050	2	10000	uc001hzz.1	129417	ENSG00000117020	AKT3	AKT serine/threonine kinase 3
906	chr1	244006645	244006973	329	*	MACS_peak_906	105.71	Promoter (<=1kb)	1	243663021	244006886	343866	2	10000	uc021plu.1	0	ENSG00000117020	AKT3	AKT serine/threonine kinase 3
1019	chr10	33247202	33247781	580	*	MACS_peak_1019	55.78	Promoter (<=1kb)	10	33189246	33247293	58048	2	3688	uc001iwt.4	0	ENSG00000150093	ITGB1	integrin subunit beta 1
1285	chr10	124228385	124228928	544	*	MACS_peak_1285	60.59	Intron (uc001lgj.2/5654, intron 1 of 8)	10	124221041	124274424	53384	1	5654	uc001lgj.2	7344	ENSG00000166033	HTRA1	HtrA serine peptidase 1
1479	chr11	35188044	35188715	672	*	MACS_peak_1479	411.43	Intron (uc021qfw.1/960, intron 1 of 8)	11	35211382	35236461	25080	1	960	uc010res.2	-22667	ENSG00000026508	CD44	CD44 molecule (Indian blood group)
1504	chr11	44200386	44200842	457	*	MACS_peak_1504	53.25	Intron (uc010rfo.2/2132, intron 8 of 13)	11	44117747	44266980	149234	1	2132	uc001mya.3	82639	ENSG00000151348	EXT2	exostosin glycosyltransferase 2
1897	chr12	22403496	22404206	711	*	MACS_peak_1897	86.11	Intron (uc001rfo.4/6489, intron 3 of 4)	12	22346325	22487648	141324	2	6489	uc001rfo.4	83442	ENSG00000111728	ST8SIA1	ST8 alpha-N-acetyl-neuraminide alpha-2,8-sialyltransferase 1
1898	chr12	22415220	22415908	689	*	MACS_peak_1898	117.17	Intron (uc001rfo.4/6489, intron 2 of 4)	12	22346325	22487648	141324	2	6489	uc001rfo.4	71740	ENSG00000111728	ST8SIA1	ST8 alpha-N-acetyl-neuraminide alpha-2,8-sialyltransferase 1
1899	chr12	22474391	22474821	431	*	MACS_peak_1899	68.34	Intron (uc001rfo.4/6489, intron 1 of 4)	12	22346325	22487648	141324	2	6489	uc001rfo.4	12827	ENSG00000111728	ST8SIA1	ST8 alpha-N-acetyl-neuraminide alpha-2,8-sialyltransferase 1
2086	chr12	65152981	65153498	518	*	MACS_peak_2086	74.58	Promoter (<=1kb)	12	65107222	65153226	46005	2	2799	uc001ssg.4	0	ENSG00000135677	GNS	glucosamine (N-acetyl)-6-sulfatase
2133	chr12	80083077	80083461	385	*	MACS_peak_2133	53.81	Promoter (1-2kb)	12	79985745	80084790	99046	2	5074	uc001syx.3	1329	ENSG00000177425	PAWR	pro-apoptotic WT1 regulator
2304	chr12	120658567	120659362	796	*	MACS_peak_2304	108.64	Intron (uc031qjr.1/5829, intron 6 of 11)	12	120648242	120654919	6678	2	5829	uc001txu.3	-3648	ENSG00000089159	PXN	paxillin
2590	chr13	111049848	111050128	281	*	MACS_peak_2590	76.11	Intron (uc001vqx.3/1284, intron 4 of 47)	13	110959631	111165373	205743	1	1284	uc001vqx.3	90217	ENSG00000134871	COL4A2	collagen type IV alpha 2 chain
2778	chr14	66041126	66041647	522	*	MACS_peak_2778	97.23	Intron (uc001xin.3/2530, intron 3 of 10)	14	65879448	66210839	331392	1	2530	uc001xiq.3	161678	ENSG00000033170	FUT8	fucosyltransferase 8
2904	chr14	100841844	100842279	436	*	MACS_peak_2904	74.98	Promoter (<=1kb)	14	100800125	100841927	41803	2	7453	uc001yhg.2	0	ENSG00000140105	WARS	tryptophanyl-tRNA synthetase
3096	chr15	75987654	75988122	469	*	MACS_peak_3096	64.27	Intron (uc002baw.3/1464, intron 1 of 9)	15	75966663	76005189	38527	2	1464	uc002baw.3	17067	ENSG00000173546	CSPG4	chondroitin sulfate proteoglycan 4
3097	chr15	75988224	75989398	1175	*	MACS_peak_3097	122.11	Intron (uc002baw.3/1464, intron 1 of 9)	15	75966663	76005189	38527	2	1464	uc002baw.3	15791	ENSG00000173546	CSPG4	chondroitin sulfate proteoglycan 4
3172	chr15	91450925	91451386	462	*	MACS_peak_3172	50.56	Promoter (<=1kb)	15	91450539	91465815	15277	1	4122	uc010uqm.2	386	ENSG00000196547	MAN2A2	mannosidase alpha class 2A member 2
3218	chr15	99214346	99214792	447	*	MACS_peak_3218	58.52	Intron (uc010urq.2/3480, intron 1 of 10)	15	99192761	99507759	314999	1	3480	uc010bon.3	21585	ENSG00000140443	IGF1R	insulin like growth factor 1 receptor
3220	chr15	99416632	99417631	1000	*	MACS_peak_3220	88.14	Intron (uc010urq.2/3480, intron 2 of 10)	15	99454544	99460184	5641	1	3480	uc010urr.1	-36913	ENSG00000140443	IGF1R	insulin like growth factor 1 receptor
3221	chr15	99418594	99419326	733	*	MACS_peak_3221	66.7	Intron (uc010urq.2/3480, intron 2 of 10)	15	99454544	99460184	5641	1	3480	uc010urr.1	-35218	ENSG00000140443	IGF1R	insulin like growth factor 1 receptor
3222	chr15	99439481	99440454	974	*	MACS_peak_3222	136.33	Exon (uc010urq.2/3480, exon 4 of 11)	15	99454544	99460184	5641	1	3480	uc010urr.1	-14090	ENSG00000140443	IGF1R	insulin like growth factor 1 receptor
3223	chr15	99474112	99474607	496	*	MACS_peak_3223	51.73	Intron (uc002bul.3/3480, intron 15 of 20)	15	99467754	99478655	10902	1	3480	uc010boo.1	6358	ENSG00000140443	IGF1R	insulin like growth factor 1 receptor
3453	chr16	70415294	70415622	329	*	MACS_peak_3453	92.78	3' UTR	16	70413338	70434541	21204	2	6483	uc002eyw.2	18919	ENSG00000157350	ST3GAL2	ST3 beta-galactoside alpha-2,3-sialyltransferase 2
3745	chr17	45332817	45333700	884	*	MACS_peak_3745	56.69	Promoter (1-2kb)	17	45331208	45421658	90451	1	3690	uc010wkr.1	1609	ENSG00000259207	ITGB3	integrin subunit beta 3
3746	chr17	45339794	45340378	585	*	MACS_peak_3746	54.83	Intron (uc002ili.1/3690, intron 1 of 8)	17	45331208	45421658	90451	1	3690	uc010wkr.1	8586	ENSG00000259207	ITGB3	integrin subunit beta 3
3766	chr17	48141813	48142456	644	*	MACS_peak_3766	61.64	Exon (uc010dbl.3/3675, exon 3 of 26)	17	48133340	48167849	34510	1	3675	uc010dbm.3	8473	ENSG00000005884	ITGA3	integrin subunit alpha 3
3843	chr17	64537671	64539140	1470	*	MACS_peak_3843	70.74	Intron (uc002jfo.1/5578, intron 3 of 14)	17	64298926	64806862	507937	1	5578	uc002jfp.1	238745	ENSG00000154229	PRKCA	protein kinase C alpha
4166	chr19	10381457	10382023	567	*	MACS_peak_4166	84.26	Promoter (<=1kb)	19	10381517	10397291	15775	1	3383	uc002mnq.2	0	ENSG00000090339	ICAM1	intercellular adhesion molecule 1
4867	chr2	122371311	122371751	441	*	MACS_peak_4867	63.94	Intron (uc002tnc.3/23332, intron 1 of 38)	2	122095352	122363756	268405	2	23332	uc010yyy.2	-7555	ENSG00000074054	CLASP1	cytoplasmic linker associated protein 1
4889	chr2	128848599	128848997	399	*	MACS_peak_4889	66.25	Promoter (<=1kb)	2	128848754	128953249	104496	1	56886	uc002tps.3	0	ENSG00000136731	UGGT1	UDP-glucose glycoprotein glucosyltransferase 1
4890	chr2	128936794	128937166	373	*	MACS_peak_4890	53.81	Intron (uc002tps.3/56886, intron 34 of 40)	2	128848782	128953249	104468	1	56886	uc002tpr.3	88012	ENSG00000136731	UGGT1	UDP-glucose glycoprotein glucosyltransferase 1
5596	chr20	43970332	43971408	1077	*	MACS_peak_5596	62.08	Intron (uc002xnu.3/6385, intron 1 of 4)	20	43953929	43977064	23136	2	6385	uc002xnu.3	5656	ENSG00000124145	SDC4	syndecan 4
5619	chr20	47326219	47326676	458	*	MACS_peak_5619	52.1	Intron (uc002xtw.1/57580, intron 5 of 39)	20	47240793	47273118	32326	2	57580	uc002xtv.1	-53101	ENSG00000124126	PREX1	phosphatidylinositol-3,4,5-trisphosphate dependent Rac exchange factor 1
5620	chr20	47343554	47344369	816	*	MACS_peak_5620	84.94	Intron (uc002xtw.1/57580, intron 4 of 39)	20	47240793	47273118	32326	2	57580	uc002xtv.1	-70436	ENSG00000124126	PREX1	phosphatidylinositol-3,4,5-trisphosphate dependent Rac exchange factor 1
5621	chr20	47363532	47364496	965	*	MACS_peak_5621	131.45	Exon (uc002xtw.1/57580, exon 2 of 40)	20	47240793	47444420	203628	2	57580	uc002xtw.1	79924	ENSG00000124126	PREX1	phosphatidylinositol-3,4,5-trisphosphate dependent Rac exchange factor 1
5622	chr20	47413752	47414578	827	*	MACS_peak_5622	52.26	Intron (uc002xtw.1/57580, intron 1 of 39)	20	47240793	47444420	203628	2	57580	uc002xtw.1	29842	ENSG00000124126	PREX1	phosphatidylinositol-3,4,5-trisphosphate dependent Rac exchange factor 1
5762	chr21	27426851	27427235	385	*	MACS_peak_5762	61.01	Intron (uc010glk.3/351, intron 3 of 16)	21	27252861	27342862	90002	2	351	uc011acg.2	-83989	ENSG00000142192	APP	amyloid beta precursor protein
5763	chr21	27451780	27452068	289	*	MACS_peak_5763	89.22	Intron (uc010glk.3/351, intron 3 of 16)	21	27252861	27512708	259848	2	351	uc010glk.3	60640	ENSG00000142192	APP	amyloid beta precursor protein
5764	chr21	27512543	27512965	423	*	MACS_peak_5764	77.58	Promoter (<=1kb)	21	27252861	27512708	259848	2	351	uc010glk.3	0	ENSG00000142192	APP	amyloid beta precursor protein
5779	chr21	32533371	32533767	397	*	MACS_peak_5779	56.63	Intron (uc011adk.1/7074, intron 14 of 25)	21	32490736	32649224	158489	2	7074	uc011adk.1	115457	ENSG00000156299	TIAM1	T-cell lymphoma invasion and metastasis 1
5780	chr21	32592802	32593542	741	*	MACS_peak_5780	118.63	Intron (uc011adk.1/7074, intron 6 of 25)	21	32490736	32649224	158489	2	7074	uc011adk.1	55682	ENSG00000156299	TIAM1	T-cell lymphoma invasion and metastasis 1
5781	chr21	32839047	32839471	425	*	MACS_peak_5781	61.91	Intron (uc002yow.1/7074, intron 1 of 28)	21	32490736	32931290	440555	2	7074	uc002yow.1	91819	ENSG00000156299	TIAM1	T-cell lymphoma invasion and metastasis 1
5782	chr21	32844670	32845172	503	*	MACS_peak_5782	65.92	Intron (uc002yow.1/7074, intron 1 of 28)	21	32490736	32931290	440555	2	7074	uc002yow.1	86118	ENSG00000156299	TIAM1	T-cell lymphoma invasion and metastasis 1
5783	chr21	32881738	32882155	418	*	MACS_peak_5783	66.92	Intron (uc002yow.1/7074, intron 1 of 28)	21	32490736	32931290	440555	2	7074	uc002yow.1	49135	ENSG00000156299	TIAM1	T-cell lymphoma invasion and metastasis 1
5867	chr21	46639216	46639795	580	*	MACS_peak_5867	72.49	Intron (uc002zgq.2/104, intron 10 of 12)	21	46683843	46697325	13483	2	23275	uc002zha.3	57530	ENSG00000186866	POFUT2	protein O-fucosyltransferase 2
6180	chr3	31573452	31574303	852	*	MACS_peak_6180	59.41	Promoter (<=1kb)	3	31574491	31661766	87276	1	201595	uc003cer.1	-188	ENSG00000163527	STT3B	STT3B, catalytic subunit of the oligosaccharyltransferase complex
6192	chr3	37533813	37534400	588	*	MACS_peak_6192	85.49	Intron (uc003chc.3/3680, intron 4 of 15)	3	37493813	37861281	367469	1	3680	uc003chd.3	40000	ENSG00000144668	ITGA9	integrin subunit alpha 9
6193	chr3	37562025	37562605	581	*	MACS_peak_6193	54.18	Intron (uc003chc.3/3680, intron 11 of 15)	3	37493813	37861281	367469	1	3680	uc003chd.3	68212	ENSG00000144668	ITGA9	integrin subunit alpha 9
6194	chr3	37645877	37646205	329	*	MACS_peak_6194	59.71	Intron (uc003chc.3/3680, intron 15 of 15)	3	37493813	37861281	367469	1	3680	uc003chd.3	152064	ENSG00000144668	ITGA9	integrin subunit alpha 9
6195	chr3	37646694	37647785	1092	*	MACS_peak_6195	60.46	Intron (uc003chc.3/3680, intron 15 of 15)	3	37493813	37861281	367469	1	3680	uc003chd.3	152881	ENSG00000144668	ITGA9	integrin subunit alpha 9
6196	chr3	37670255	37670963	709	*	MACS_peak_6196	64.58	3' UTR	3	37493813	37861281	367469	1	3680	uc003chd.3	176442	ENSG00000144668	ITGA9	integrin subunit alpha 9
6260	chr3	49503084	49503807	724	*	MACS_peak_6260	56.49	Promoter (2-3kb)	3	49506136	49573051	66916	1	1605	uc021wxz.1	-2329	ENSG00000173402	DAG1	dystroglycan 1
6367	chr3	72941267	72941954	688	*	MACS_peak_6367	67.73	Intron (uc003dpg.3/727936, intron 1 of 6)	3	72937385	73024522	87138	1	727936	uc003dpg.3	3882	ENSG00000172986	GXYLT2	glucoside xylosyltransferase 2
6401	chr3	89204703	89205913	1211	*	MACS_peak_6401	86.57	Intron (uc003dqx.1/2042, intron 2 of 6)	3	89156674	89531284	374611	1	2042	uc003dqy.3	48029	ENSG00000044524	EPHA3	EPH receptor A3
6402	chr3	89220702	89221185	484	*	MACS_peak_6402	98.68	Intron (uc003dqx.1/2042, intron 2 of 6)	3	89156674	89531284	374611	1	2042	uc003dqy.3	64028	ENSG00000044524	EPHA3	EPH receptor A3
6403	chr3	89386857	89387427	571	*	MACS_peak_6403	50.68	Intron (uc003dqx.1/2042, intron 3 of 6)	3	89156674	89531284	374611	1	2042	uc003dqy.3	230183	ENSG00000044524	EPHA3	EPH receptor A3
6483	chr3	119590214	119590600	387	*	MACS_peak_6483	59.33	Intron (uc003edn.3/2932, intron 8 of 11)	3	119540802	119582452	41651	2	2932	uc003edm.3	-7762	ENSG00000082701	GSK3B	glycogen synthase kinase 3 beta
6484	chr3	119844913	119845451	539	*	MACS_peak_6484	96.72	Intron (uc003edp.3/uc003edp.3, intron 4 of 5)	3	119540802	119813264	272463	2	2932	uc003edo.3	-31649	ENSG00000082701	GSK3B	glycogen synthase kinase 3 beta
6502	chr3	124505784	124506117	334	*	MACS_peak_6502	68.19	Intron (uc010hrx.3/3693, intron 2 of 6)	3	124481795	124536557	54763	2	3693	uc010hrx.3	30440	ENSG00000082781	ITGB5	integrin subunit beta 5
6503	chr3	124556315	124556987	673	*	MACS_peak_6503	70.21	Intron (uc003eho.3/3693, intron 5 of 14)	3	124481795	124536557	54763	2	3693	uc010hrx.3	-19758	ENSG00000082781	ITGB5	integrin subunit beta 5
6504	chr3	124579471	124579739	269	*	MACS_peak_6504	76.11	Intron (uc003eho.3/3693, intron 2 of 14)	3	124481795	124606144	124350	2	3693	uc003eho.3	26405	ENSG00000082781	ITGB5	integrin subunit beta 5
6744	chr3	182951805	182952402	598	*	MACS_peak_6744	87.82	Intron (uc003fli.1/23101, intron 15 of 29)	3	182971032	182991179	20148	1	84002	uc003flk.3	-18630	ENSG00000176597	B3GNT5	UDP-GlcNAc:betaGal beta-1,3-N-acetylglucosaminyltransferase 5
6782	chr3	187456140	187456823	684	*	MACS_peak_6782	61.8	Promoter (1-2kb)	3	187439165	187454285	15121	2	604	uc010hza.2	-1855	ENSG00000113916	BCL6	B-cell CLL/lymphoma 6
6783	chr3	187463133	187463713	581	*	MACS_peak_6783	90.43	Promoter (<=1kb)	3	187439165	187463513	24349	2	604	uc003frq.2	0	ENSG00000113916	BCL6	B-cell CLL/lymphoma 6
6823	chr3	195310738	195311462	725	*	MACS_peak_6823	122.41	Promoter (<=1kb)	3	195295573	195311076	15504	2	347	uc003fur.2	0	ENSG00000189058	APOD	apolipoprotein D
7007	chr4	77008284	77008756	473	*	MACS_peak_7007	54.13	Intron (uc003hjk.3/419, intron 3 of 9)	4	77002977	77033955	30979	1	419	uc010ijd.3	5307	ENSG00000156219	ART3	ADP-ribosyltransferase 3
7056	chr4	103423166	103423748	583	*	MACS_peak_7056	61.62	Promoter (<=1kb)	4	103422486	103538459	115974	1	4790	uc011ceq.2	680	ENSG00000109320	NFKB1	nuclear factor kappa B subunit 1
7161	chr4	157692333	157692987	655	*	MACS_peak_7161	82.67	Intron (uc011cir.3/56034, intron 6 of 7)	4	157682763	157771568	88806	2	56034	uc011cir.3	78581	ENSG00000145431	PDGFC	platelet derived growth factor C
7186	chr4	174147639	174147936	298	*	MACS_peak_7186	85.97	Intron (uc003isz.4/51809, intron 1 of 11)	4	174089904	174245118	155215	1	51809	uc003isz.4	57735	ENSG00000109586	GALNT7	polypeptide N-acetylgalactosaminyltransferase 7
7317	chr5	52163110	52163679	570	*	MACS_peak_7317	53.59	Intron (uc003jou.3/3672, intron 6 of 28)	5	52197609	52249485	51877	1	3672	uc003jow.3	-33930	ENSG00000213949	ITGA1	integrin subunit alpha 1
7375	chr5	73980614	73981114	501	*	MACS_peak_7375	50.46	Promoter (<=1kb)	5	73980969	74017113	36145	1	3074	uc003kdf.4	0	ENSG00000049860	HEXB	hexosaminidase subunit beta
7404	chr5	82769081	82769820	740	*	MACS_peak_7404	97.91	Promoter (1-2kb)	5	82767493	82878122	110630	1	1462	uc010jau.2	1588	ENSG00000038427	VCAN	versican
7405	chr5	82827504	82827926	423	*	MACS_peak_7405	55.15	Intron (uc003kii.3/1462, intron 7 of 14)	5	82831433	82878122	46690	1	1462	uc003kil.3	-3507	ENSG00000038427	VCAN	versican
7407	chr5	83425691	83426336	646	*	MACS_peak_7407	68.57	Intron (uc003kio.1/10085, intron 5 of 10)	5	83343425	83374647	31223	2	10085	uc011ctt.1	-51044	ENSG00000164176	EDIL3	EGF like repeats and discoidin domains 3
7598	chr5	156938340	156939007	668	*	MACS_peak_7598	56.82	Intron (uc003lww.3/8728, intron 8 of 22)	5	156904312	156929988	25677	2	8728	uc003lwy.3	-8352	ENSG00000135074	ADAM19	ADAM metallopeptidase domain 19
7682	chr6	1762481	1763017	537	*	MACS_peak_7682	64.87	Intron (uc021ykn.1/2762, intron 7 of 10)	6	1610681	1614129	3449	1	2296	uc003mtp.3	151800	ENSG00000054598	FOXC1	forkhead box C1
8244	chr7	5630976	5631523	548	*	MACS_peak_8244	60.17	Promoter (<=1kb)	7	5632436	5646287	13852	1	6624	uc003sou.3	-913	ENSG00000075618	FSCN1	fascin actin-bundling protein 1
8570	chr7	92346886	92347596	711	*	MACS_peak_8570	89.25	Intron (uc011khw.2/1021, intron 4 of 7)	7	92234235	92463231	228997	2	1021	uc011khw.2	115635	ENSG00000105810	CDK6	cyclin dependent kinase 6
8571	chr7	92390711	92391276	566	*	MACS_peak_8571	56.08	Intron (uc011khw.2/1021, intron 3 of 7)	7	92234235	92463231	228997	2	1021	uc011khw.2	71955	ENSG00000105810	CDK6	cyclin dependent kinase 6
8625	chr7	100781549	100782101	553	*	MACS_peak_8625	89.48	3' UTR	7	100774818	100781707	6890	1	5054	uc003uxu.2	6731	ENSG00000106366	SERPINE1	serpin family E member 1
8670	chr7	107586994	107588014	1021	*	MACS_peak_8670	69.26	Intron (uc003vev.2/3912, intron 22 of 31)	7	107564246	107642448	78203	2	3912	uc003vev.2	54434	ENSG00000091136	LAMB1	laminin subunit beta 1
8695	chr7	115956935	115957640	706	*	MACS_peak_8695	186.75	Intron (uc003vhs.1/uc003vhs.1, intron 3 of 6)	7	115929906	116146190	216285	1	858	uc003vib.2	27029	ENSG00000105971	CAV2	caveolin 2
8696	chr7	116057787	116058121	335	*	MACS_peak_8696	66.25	Intron (uc003vhv.2/858, intron 7 of 10)	7	116139655	116148595	8941	1	858	uc003vid.3	-81534	ENSG00000105971	CAV2	caveolin 2
8697	chr7	116185738	116186483	746	*	MACS_peak_8697	134.63	Intron (uc010lkd.2/857, intron 8 of 8)	7	116166412	116201239	34828	1	857	uc010lkf.2	19326	ENSG00000105974	CAV1	caveolin 1
8903	chr8	9463256	9464074	819	*	MACS_peak_8903	57.29	Intron (uc011kwv.1/8658, intron 2 of 10)	8	9432558	9639856	207299	1	8658	uc011kww.2	30698	ENSG00000173273	TNKS	tankyrase
8936	chr8	19315654	19316042	389	*	MACS_peak_8936	51.48	Exon (uc011kyn.2/55790, exon 5 of 10)	8	19261672	19460056	198385	2	55790	uc011kyn.2	144014	ENSG00000147408	CSGALNACT1	chondroitin sulfate N-acetylgalactosaminyltransferase 1
8937	chr8	19352689	19353023	335	*	MACS_peak_8937	61.01	Intron (uc011kyn.2/55790, intron 4 of 9)	8	19261672	19460056	198385	2	55790	uc011kyn.2	107033	ENSG00000147408	CSGALNACT1	chondroitin sulfate N-acetylgalactosaminyltransferase 1
8938	chr8	19364000	19364469	470	*	MACS_peak_8938	53.86	Intron (uc011kyn.2/55790, intron 3 of 9)	8	19261672	19460056	198385	2	55790	uc011kyn.2	95587	ENSG00000147408	CSGALNACT1	chondroitin sulfate N-acetylgalactosaminyltransferase 1
8939	chr8	19368464	19369030	567	*	MACS_peak_8939	72.46	Intron (uc011kyn.2/55790, intron 3 of 9)	8	19261672	19460056	198385	2	55790	uc011kyn.2	91026	ENSG00000147408	CSGALNACT1	chondroitin sulfate N-acetylgalactosaminyltransferase 1
8940	chr8	19496584	19496988	405	*	MACS_peak_8940	58.52	Intron (uc011kyo.2/55790, intron 1 of 9)	8	19297341	19460056	162716	2	55790	uc003wzh.2	-36528	ENSG00000147408	CSGALNACT1	chondroitin sulfate N-acetylgalactosaminyltransferase 1
[truncated: 9 more rows]
