# Supplementary material for: MITF reprograms the extracellular matrix and focal adhesion in melanoma
Source: eLife. 2021 Jan 13;10:e63093. doi: 10.7554/eLife.63093 (PMC7857731; doi:10.7554/eLife.63093)
Supplement: Supplementary file 4. [file elife-63093-supp4.xlsx]

## Sheet: HA-MITF-501Mel
HA-MITF-501Mel peaks associated genes
seqnames	start	end	width	strand	V4	V5	annotation	geneChr	geneStart	geneEnd	geneLength	geneStrand	geneId	transcriptId	distanceToTSS	ENSEMBL	SYMBOL	GENENAME
chr1	801494	802086	593	*	MACS_peak_1	66.45	Downstream (1-2kb)	1	803451	812182	8732	2	284593	uc001abt.4	10096	ENSG00000230368	FAM41C	family with sequence similarity 41 member C
chr1	802206	802768	563	*	MACS_peak_2	187.54	Downstream (<1kb)	1	803451	812182	8732	2	284593	uc001abt.4	9414	ENSG00000230368	FAM41C	family with sequence similarity 41 member C
chr1	861000	863608	2609	*	MACS_peak_3	57.7	Promoter (<=1kb)	1	861121	879961	18841	1	148398	uc001abw.1	0	ENSG00000187634	SAMD11	sterile alpha motif domain containing 11
chr1	896208	900028	3821	*	MACS_peak_4	50.07	Promoter (<=1kb)	1	896829	897858	1030	1	339451	uc001acb.1	0	ENSG00000187961	KLHL17	kelch like family member 17
chr1	917041	919768	2728	*	MACS_peak_5	160.54	Promoter (<=1kb)	1	910579	917473	6895	2	84808	uc001ach.2	0	ENSG00000187642	PERM1	PPARGC1 and ESRR induced regulator, muscle 1
chr1	966079	968385	2307	*	MACS_peak_6	223.29	Intron (uc001ack.2/375790, intron 2 of 35)	1	955503	991499	35997	1	375790	uc001ack.2	10576	ENSG00000188157	AGRN	agrin
chr1	997568	1000246	2679	*	MACS_peak_7	73.48	Exon (uc001acl.1/uc001acl.1, exon 3 of 4)	1	1007126	1009687	2562	2	401934	uc021oen.1	9441	ENSG00000237330	RNF223	ring finger protein 223
chr1	1004475	1006568	2094	*	MACS_peak_8	81.87	Downstream (<1kb)	1	1007126	1009687	2562	2	401934	uc021oen.1	3119	ENSG00000237330	RNF223	ring finger protein 223
chr1	1007134	1010960	3827	*	MACS_peak_9	110.64	Promoter (<=1kb)	1	1007126	1009687	2562	2	401934	uc021oen.1	0	ENSG00000237330	RNF223	ring finger protein 223
chr1	1014657	1016072	1416	*	MACS_peak_10	216.19	Downstream (1-2kb)	1	1007126	1009687	2562	2	401934	uc021oen.1	-4970	ENSG00000237330	RNF223	ring finger protein 223
chr1	1100118	1101920	1803	*	MACS_peak_12	52.56	Promoter (<=1kb)	1	1102484	1102578	95	1	406984	uc001acw.2	-564	ENSG00000207730	MIR200B	microRNA 200b
chr1	1238081	1245723	7643	*	MACS_peak_13	263.24	Promoter (<=1kb)	1	1227764	1241309	13546	2	116983	uc001aea.2	0	ENSG00000131584	ACAP3	ArfGAP with coiled-coil, ankyrin repeat and PH domains 3
chr1	1262844	1267232	4389	*	MACS_peak_14	62.1	Promoter (<=1kb)	1	1266726	1269844	3119	1	83756	uc010nyk.2	0	ENSG00000169962	TAS1R3	taste 1 receptor member 3
chr1	1270233	1272401	2169	*	MACS_peak_15	73.91	3' UTR	1	1270658	1275557	4900	2	1855	uc002quu.3	3156	ENSG00000107404	DVL1	dishevelled segment polarity protein 1
chr1	1338960	1339668	709	*	MACS_peak_16	70.88	Intron (uc001afo.4/55052, intron 3 of 3)	1	1337276	1342693	5418	2	55052	uc001afo.4	3025	ENSG00000242485	MRPL20	mitochondrial ribosomal protein L20
chr1	1341924	1343598	1675	*	MACS_peak_17	81.32	Promoter (<=1kb)	1	1337276	1342693	5418	2	55052	uc001afo.4	0	ENSG00000242485	MRPL20	mitochondrial ribosomal protein L20
chr1	1375135	1378148	3014	*	MACS_peak_18	138.16	3' UTR	1	1370903	1378262	7360	1	64856	uc001afs.3	4232	ENSG00000179403	VWA1	von Willebrand factor A domain containing 1
chr1	1440049	1441408	1360	*	MACS_peak_19	109.58	Intron (uc021oeq.1/83858, intron 7 of 7)	1	1447523	1470067	22545	1	55210	uc001afz.2	-6115	ENSG00000197785	ATAD3A	ATPase family, AAA domain containing 3A
chr1	1446521	1447765	1245	*	MACS_peak_20	67.89	Promoter (<=1kb)	1	1447523	1470067	22545	1	55210	uc001afz.2	0	ENSG00000197785	ATAD3A	ATPase family, AAA domain containing 3A
chr1	1501531	1503764	2234	*	MACS_peak_21	276.56	Intron (uc001agd.3/29101, intron 1 of 4)	1	1477053	1510262	33210	2	29101	uc001agd.3	6498	ENSG00000160075	SSU72	SSU72 homolog, RNA polymerase II CTD phosphatase
chr1	1508285	1511511	3227	*	MACS_peak_22	60.63	Promoter (<=1kb)	1	1477053	1510262	33210	2	29101	uc001agd.3	0	ENSG00000160075	SSU72	SSU72 homolog, RNA polymerase II CTD phosphatase
chr1	1549584	1552604	3021	*	MACS_peak_23	137.45	Promoter (<=1kb)	1	1550795	1554590	3796	1	142678	uc021oet.1	0	ENSG00000197530	MIB2	mindbomb E3 ubiquitin protein ligase 2
chr1	1596296	1597741	1446	*	MACS_peak_24	88.26	3' UTR	1	1592939	1601578	8640	2	728661	uc001ahe.4	3837	ENSG00000189339	SLC35E2B	solute carrier family 35 member E2B
chr1	1753703	1754374	672	*	MACS_peak_25	90.43	Intron (uc001aif.3/2782, intron 3 of 11)	1	1682671	1711508	28838	2	65220	uc001aie.3	-42195	ENSG00000008130	NADK	NAD kinase
chr1	1849993	1853308	3316	*	MACS_peak_26	50.25	Promoter (<=1kb)	1	1849029	1850236	1208	2	339456	uc001aii.2	0	ENSG00000178821	TMEM52	transmembrane protein 52
chr1	1855726	1858037	2312	*	MACS_peak_27	61.34	5' UTR	1	1849029	1850740	1712	2	339456	uc001aij.2	-4986	ENSG00000178821	TMEM52	transmembrane protein 52
chr1	1909337	1911625	2289	*	MACS_peak_29	3100	Intron (uc001aim.1/85452, intron 6 of 17)	1	1886586	1922414	35829	2	85452	uc009vkz.1	10789	ENSG00000142609	CFAP74	cilia and flagella associated protein 74
chr1	2019003	2020479	1477	*	MACS_peak_31	51.77	Intron (uc001aiq.3/5590, intron 4 of 17)	1	2005425	2116834	111410	1	5590	uc010nyw.2	13578	ENSG00000067606	PRKCZ	protein kinase C zeta
chr1	2034614	2040626	6013	*	MACS_peak_32	78.69	Promoter (<=1kb)	1	2036155	2116834	80680	1	5590	uc001ais.3	0	ENSG00000067606	PRKCZ	protein kinase C zeta
chr1	2065788	2068360	2573	*	MACS_peak_33	93.73	5' UTR	1	2076796	2088167	11372	1	5590	uc009vlb.3	-8436	ENSG00000067606	PRKCZ	protein kinase C zeta
chr1	2096774	2098654	1881	*	MACS_peak_34	76.09	Promoter (1-2kb)	1	2100287	2116834	16548	1	5590	uc001ait.3	-1633	ENSG00000067606	PRKCZ	protein kinase C zeta
chr1	2108699	2113641	4943	*	MACS_peak_35	195.86	Exon (uc010nyx.2/5590, exon 12 of 14)	1	2100287	2116834	16548	1	5590	uc001ait.3	8412	ENSG00000067606	PRKCZ	protein kinase C zeta
chr1	2118886	2120195	1310	*	MACS_peak_36	76.13	Intron (uc001aiv.2/199990, intron 5 of 7)	1	2115899	2126214	10316	2	199990	uc001aiv.2	6019	ENSG00000162585	FAAP20	Fanconi anemia core complex associated protein 20
chr1	2161496	2164798	3303	*	MACS_peak_37	120.5	Promoter (1-2kb)	1	2160134	2241652	81519	1	6497	uc001aja.4	1362	ENSG00000157933	SKI	SKI proto-oncogene
chr1	2204473	2205942	1470	*	MACS_peak_38	54.56	Intron (uc001aja.4/6497, intron 1 of 6)	1	2160134	2241652	81519	1	6497	uc001aja.4	44339	ENSG00000157933	SKI	SKI proto-oncogene
chr1	2224895	2226412	1518	*	MACS_peak_39	56.97	Intron (uc001aja.4/6497, intron 1 of 6)	1	2281853	2284100	2248	2	100129534	uc001ajc.3	57688	ENSG00000269896	LOC100129534	small nuclear ribonucleoprotein polypeptide N pseudogene
chr1	2343475	2346146	2672	*	MACS_peak_40	79.75	Promoter (<=1kb)	1	2336241	2344010	7770	2	5192	uc001ajg.3	0	ENSG00000157911	PEX10	peroxisomal biogenesis factor 10
chr1	2417119	2419790	2672	*	MACS_peak_42	165.98	Exon (uc001aji.1/9651, exon 6 of 22)	1	2411623	2436969	25347	1	9651	uc001ajk.1	5496	ENSG00000149527	PLCH2	phospholipase C eta 2
chr1	2476419	2479528	3110	*	MACS_peak_43	185.58	Downstream (1-2kb)	1	2481359	2484284	2926	2	115110	uc001ajo.2	4756	NA	TNFRSF14-AS1	TNFRSF14 antisense RNA 1
chr1	2479563	2480830	1268	*	MACS_peak_44	69.98	Downstream (<1kb)	1	2481359	2484284	2926	2	115110	uc001ajo.2	3454	NA	TNFRSF14-AS1	TNFRSF14 antisense RNA 1
chr1	2485898	2489722	3825	*	MACS_peak_45	397.36	Promoter (<=1kb)	1	2486163	2488450	2288	2	100133445	uc021oev.1	0	NA	NA	NA
chr1	2586867	2587926	1060	*	MACS_peak_46	59.75	Intron (uc021oey.1/100287898, intron 4 of 6)	1	2522081	2564481	42401	2	79258	uc001ajy.2	-22386	ENSG00000142606	MMEL1	membrane metalloendopeptidase like 1
chr1	2614653	2616833	2181	*	MACS_peak_47	95.94	Intron (uc021oey.1/100287898, intron 4 of 6)	1	2522081	2564481	42401	2	79258	uc001ajy.2	-50172	ENSG00000142606	MMEL1	membrane metalloendopeptidase like 1
chr1	2618579	2624506	5928	*	MACS_peak_48	152.36	Intron (uc021oey.1/100287898, intron 4 of 6)	1	2522081	2564481	42401	2	79258	uc001ajy.2	-54098	ENSG00000142606	MMEL1	membrane metalloendopeptidase like 1
chr1	2699796	2701207	1412	*	MACS_peak_49	369.25	Exon (uc021oey.1/100287898, exon 4 of 7)	1	2572807	2706230	133424	2	100287898	uc021oey.1	5023	ENSG00000215912	TTC34	tetratricopeptide repeat domain 34
chr1	2982333	2985089	2757	*	MACS_peak_58	54.72	Promoter (<=1kb)	1	2980636	2984289	3654	2	440556	uc010nzg.1	0	ENSG00000177133	LINC00982	long intergenic non-protein coding RNA 982
chr1	3001983	3003333	1351	*	MACS_peak_59	50.83	Intron (uc001akc.3/63976, intron 1 of 16)	1	2985742	3355185	369444	1	63976	uc009vlh.3	16241	ENSG00000142611	PRDM16	PR/SET domain 16
chr1	3096565	3099355	2791	*	MACS_peak_60	51.17	Intron (uc001akc.3/63976, intron 1 of 16)	1	3044539	3044599	61	1	100422968	uc021oez.1	52026	ENSG00000283572	MIR4251	microRNA 4251
chr1	3122267	3126303	4037	*	MACS_peak_61	164.32	Intron (uc001akc.3/63976, intron 2 of 16)	1	3044539	3044599	61	1	100422968	uc021oez.1	77728	ENSG00000283572	MIR4251	microRNA 4251
chr1	3186551	3187960	1410	*	MACS_peak_62	51.25	Intron (uc001akc.3/63976, intron 3 of 16)	1	3044539	3044599	61	1	100422968	uc021oez.1	142012	ENSG00000283572	MIR4251	microRNA 4251
chr1	3193450	3197310	3861	*	MACS_peak_63	65.58	Intron (uc001akc.3/63976, intron 3 of 16)	1	3044539	3044599	61	1	100422968	uc021oez.1	148911	ENSG00000283572	MIR4251	microRNA 4251
chr1	3232870	3234467	1598	*	MACS_peak_64	55.16	Intron (uc001akc.3/63976, intron 3 of 16)	1	3371147	3397677	26531	1	27237	uc001akg.4	-136680	ENSG00000130762	ARHGEF16	Rho guanine nucleotide exchange factor 16
chr1	3324422	3326107	1686	*	MACS_peak_65	140.35	Intron (uc001akc.3/63976, intron 8 of 16)	1	3371147	3397677	26531	1	27237	uc001akg.4	-45040	ENSG00000130762	ARHGEF16	Rho guanine nucleotide exchange factor 16
chr1	3332300	3337250	4951	*	MACS_peak_66	92.33	Exon (uc001akc.3/63976, exon 11 of 17)	1	3371147	3397677	26531	1	27237	uc001akg.4	-33897	ENSG00000130762	ARHGEF16	Rho guanine nucleotide exchange factor 16
chr1	3338279	3344247	5969	*	MACS_peak_67	58.93	Exon (uc001akc.3/63976, exon 13 of 17)	1	3371147	3397677	26531	1	27237	uc001akg.4	-26900	ENSG00000130762	ARHGEF16	Rho guanine nucleotide exchange factor 16
chr1	3368349	3371509	3161	*	MACS_peak_68	79.27	Promoter (<=1kb)	1	3371147	3397677	26531	1	27237	uc001akg.4	0	ENSG00000130762	ARHGEF16	Rho guanine nucleotide exchange factor 16
chr1	3411649	3422022	10374	*	MACS_peak_69	105.67	Exon (uc001akk.3/1953, exon 13 of 30)	1	3388171	3397677	9507	1	27237	uc010nzh.2	23478	ENSG00000130762	ARHGEF16	Rho guanine nucleotide exchange factor 16
chr1	3431693	3437227	5535	*	MACS_peak_70	87.1	Exon (uc001akk.3/1953, exon 3 of 30)	1	3404506	3448012	43507	2	1953	uc001akk.3	10785	ENSG00000162591	MEGF6	multiple EGF like domains 6
chr1	3439646	3441059	1414	*	MACS_peak_71	157.73	Exon (uc001akk.3/1953, exon 2 of 30)	1	3404506	3448012	43507	2	1953	uc001akk.3	6953	ENSG00000162591	MEGF6	multiple EGF like domains 6
chr1	3513202	3517541	4340	*	MACS_peak_72	102.33	Intron (uc001akl.3/1953, intron 2 of 36)	1	3404506	3528059	123554	2	1953	uc001akl.3	10518	ENSG00000162591	MEGF6	multiple EGF like domains 6
chr1	3548596	3552040	3445	*	MACS_peak_74	98.47	3' UTR	1	3541588	3546694	5107	1	127262	uc031pkw.1	7008	ENSG00000158109	TPRG1L	tumor protein p63 regulated 1 like
chr1	3636911	3640168	3258	*	MACS_peak_75	99.78	Exon (uc001akp.3/7161, exon 5 of 14)	1	3644042	3652765	8724	1	7161	uc010nzl.2	-3874	ENSG00000078900	TP73	tumor protein p73
chr1	3658346	3659984	1639	*	MACS_peak_76	109.23	Exon (uc001akt.4/57212, exon 3 of 6)	1	3652548	3663335	10788	2	57212	uc001akt.4	3351	ENSG00000227372	TP73-AS1	TP73 antisense RNA 1
chr1	3815807	3818285	2479	*	MACS_peak_77	190.56	Promoter (<=1kb)	1	3816968	3832011	15044	1	100133612	uc001alg.3	0	ENSG00000236423	LINC01134	long intergenic non-protein coding RNA 1134
chr1	4467453	4469519	2067	*	MACS_peak_92	72.44	Promoter (2-3kb)	1	4472111	4484744	12634	1	284661	uc001alj.2	-2592	ENSG00000235054	LINC01777	long intergenic non-protein coding RNA 1777
chr1	4475073	4475848	776	*	MACS_peak_93	105.47	Promoter (2-3kb)	1	4472111	4484744	12634	1	284661	uc001alj.2	2962	ENSG00000235054	LINC01777	long intergenic non-protein coding RNA 1777
chr1	4759715	4760639	925	*	MACS_peak_99	77.93	Intron (uc001alm.1/55966, intron 1 of 5)	1	4715105	4843851	128747	1	55966	uc001aln.3	44610	ENSG00000196581	AJAP1	adherens junctions associated protein 1
chr1	4776227	4777921	1695	*	MACS_peak_100	60.97	Intron (uc001alm.1/55966, intron 2 of 5)	1	4715105	4843851	128747	1	55966	uc001aln.3	61122	ENSG00000196581	AJAP1	adherens junctions associated protein 1
chr1	4779869	4781470	1602	*	MACS_peak_101	53.62	Intron (uc001alm.1/55966, intron 2 of 5)	1	4715105	4843851	128747	1	55966	uc001aln.3	64764	ENSG00000196581	AJAP1	adherens junctions associated protein 1
chr1	4786703	4788993	2291	*	MACS_peak_102	50.32	Intron (uc001alm.1/55966, intron 2 of 5)	1	4715105	4843851	128747	1	55966	uc001aln.3	71598	ENSG00000196581	AJAP1	adherens junctions associated protein 1
chr1	4805313	4806225	913	*	MACS_peak_103	85.11	Intron (uc001alm.1/55966, intron 2 of 5)	1	4715105	4843851	128747	1	55966	uc001aln.3	90208	ENSG00000196581	AJAP1	adherens junctions associated protein 1
chr1	4806679	4808762	2084	*	MACS_peak_104	96.02	Intron (uc001alm.1/55966, intron 2 of 5)	1	4715105	4843851	128747	1	55966	uc001aln.3	91574	ENSG00000196581	AJAP1	adherens junctions associated protein 1
chr1	4824496	4825317	822	*	MACS_peak_105	65.53	Intron (uc001alm.1/55966, intron 2 of 5)	1	4715105	4843851	128747	1	55966	uc001aln.3	109391	ENSG00000196581	AJAP1	adherens junctions associated protein 1
chr1	5651819	5652574	756	*	MACS_peak_111	114.23	Intron (uc001alp.1/uc001alp.1, intron 1 of 2)	1	5624131	5624203	73	1	100616489	uc021ofm.1	27688	ENSG00000264341	MIR4417	microRNA 4417
chr1	5676487	5677601	1115	*	MACS_peak_112	618.04	Intron (uc001alp.1/uc001alp.1, intron 1 of 2)	1	5624131	5624203	73	1	100616489	uc021ofm.1	52356	ENSG00000264341	MIR4417	microRNA 4417
chr1	5697839	5698791	953	*	MACS_peak_113	72.83	Intron (uc001alp.1/uc001alp.1, intron 1 of 2)	1	5624131	5624203	73	1	100616489	uc021ofm.1	73708	ENSG00000264341	MIR4417	microRNA 4417
chr1	5974713	5976487	1775	*	MACS_peak_119	240.9	Intron (uc001alq.2/261734, intron 11 of 29)	1	5946555	5965543	18989	2	261734	uc009vlu.2	-9170	ENSG00000131697	NPHP4	nephrocystin 4
chr1	5976519	5978283	1765	*	MACS_peak_120	104.36	Intron (uc001alq.2/261734, intron 11 of 29)	1	5946555	5965543	18989	2	261734	uc009vlu.2	-10976	ENSG00000131697	NPHP4	nephrocystin 4
chr1	6002628	6003379	752	*	MACS_peak_121	72.87	Intron (uc001alq.2/261734, intron 9 of 29)	1	5946555	5965543	18989	2	261734	uc009vlu.2	-37085	ENSG00000131697	NPHP4	nephrocystin 4
chr1	6060716	6062789	2074	*	MACS_peak_122	58.54	Intron (uc009vlv.2/8514, intron 1 of 15)	1	5937153	6052533	115381	2	261734	uc009vlt.2	-8183	ENSG00000131697	NPHP4	nephrocystin 4
chr1	6063066	6064446	1381	*	MACS_peak_123	145.05	Intron (uc009vlv.2/8514, intron 1 of 15)	1	5937153	6052533	115381	2	261734	uc009vlt.2	-10533	ENSG00000131697	NPHP4	nephrocystin 4
chr1	6076053	6077364	1312	*	MACS_peak_124	260.79	Intron (uc009vlv.2/8514, intron 1 of 15)	1	6086073	6158621	72549	1	8514	uc001alu.3	-8709	ENSG00000069424	KCNAB2	potassium voltage-gated channel subfamily A regulatory beta subunit 2
chr1	6085164	6089082	3919	*	MACS_peak_125	344	Promoter (<=1kb)	1	6086073	6158621	72549	1	8514	uc001alu.3	0	ENSG00000069424	KCNAB2	potassium voltage-gated channel subfamily A regulatory beta subunit 2
chr1	6089941	6091336	1396	*	MACS_peak_126	180.63	Intron (uc009vlv.2/8514, intron 1 of 15)	1	6094348	6161253	66906	1	8514	uc001alx.2	-3012	ENSG00000069424	KCNAB2	potassium voltage-gated channel subfamily A regulatory beta subunit 2
chr1	6193241	6195910	2670	*	MACS_peak_127	102.97	Promoter (1-2kb)	1	6161847	6191808	29962	2	26038	uc001alz.2	-1433	ENSG00000116254	CHD5	chromodomain helicase DNA binding protein 5
chr1	6200191	6201022	832	*	MACS_peak_128	55.64	Intron (uc001ama.2/26038, intron 4 of 30)	1	6161847	6204215	42369	2	26038	uc001ama.2	3193	ENSG00000116254	CHD5	chromodomain helicase DNA binding protein 5
chr1	6259117	6260003	887	*	MACS_peak_129	57.72	Promoter (<=1kb)	1	6245080	6259679	14600	2	6146	uc001amd.3	0	ENSG00000116251	RPL22	ribosomal protein L22
chr1	6346264	6347663	1400	*	MACS_peak_130	59.35	Intron (uc001amq.3/11332, intron 7 of 8)	1	6307406	6321035	13630	2	387509	uc001amp.2	-25229	ENSG00000158292	GPR153	G protein-coupled receptor 153
chr1	6349770	6351024	1255	*	MACS_peak_131	118.25	Intron (uc001amq.3/11332, intron 7 of 8)	1	6307406	6321035	13630	2	387509	uc001amp.2	-28735	ENSG00000158292	GPR153	G protein-coupled receptor 153
chr1	6380449	6382969	2521	*	MACS_peak_132	63.36	Intron (uc001amq.3/11332, intron 5 of 8)	1	6324332	6419004	94673	2	11332	uc001amq.3	36035	ENSG00000097021	ACOT7	acyl-CoA thioesterase 7
chr1	6401815	6402827	1013	*	MACS_peak_133	93.69	Intron (uc001amq.3/11332, intron 2 of 8)	1	6324332	6419004	94673	2	11332	uc001amq.3	16177	ENSG00000097021	ACOT7	acyl-CoA thioesterase 7
chr1	6402858	6404381	1524	*	MACS_peak_134	68.89	Intron (uc001amq.3/11332, intron 2 of 8)	1	6324332	6419004	94673	2	11332	uc001amq.3	14623	ENSG00000097021	ACOT7	acyl-CoA thioesterase 7
chr1	6404916	6407206	2291	*	MACS_peak_135	68.22	Intron (uc001amq.3/11332, intron 2 of 8)	1	6324332	6419004	94673	2	11332	uc001amq.3	11798	ENSG00000097021	ACOT7	acyl-CoA thioesterase 7
chr1	6424942	6425708	767	*	MACS_peak_136	56.88	Intron (uc001ams.3/11332, intron 1 of 8)	1	6324332	6420764	96433	2	11332	uc001amr.3	-4178	ENSG00000097021	ACOT7	acyl-CoA thioesterase 7
chr1	6438039	6439068	1030	*	MACS_peak_137	51.53	Intron (uc001ams.3/11332, intron 1 of 8)	1	6324332	6445883	121552	2	11332	uc001ams.3	6815	ENSG00000097021	ACOT7	acyl-CoA thioesterase 7
chr1	6487147	6488629	1483	*	MACS_peak_138	55.69	Promoter (1-2kb)	1	6489894	6489956	63	2	100422975	uc021ofo.1	1327	ENSG00000265392	MIR4252	microRNA 4252
chr1	6538163	6538623	461	*	MACS_peak_139	56.42	Promoter (<=1kb)	1	6526152	6537718	11567	2	57449	uc009vma.1	-445	ENSG00000171680	PLEKHG5	pleckstrin homology and RhoGEF domain containing G5
chr1	6646334	6649447	3114	*	MACS_peak_140	98.07	Promoter (<=1kb)	1	6645362	6649340	3979	1	3104	uc001any.2	972	ENSG00000204859	ZBTB48	zinc finger and BTB domain containing 48
chr1	6660753	6664553	3801	*	MACS_peak_141	258.22	Promoter (<=1kb)	1	6650779	6662929	12151	2	9903	uc001anz.1	0	ENSG00000162413	KLHL21	kelch like family member 21
chr1	6683076	6684143	1068	*	MACS_peak_142	105.86	Promoter (<=1kb)	1	6684925	6693642	8718	1	90326	uc001aoc.3	-782	ENSG00000041988	THAP3	THAP domain containing 3
chr1	6760933	6762453	1521	*	MACS_peak_143	81.68	Promoter (<=1kb)	1	6694228	6761966	67739	2	55735	uc001aof.2	0	ENSG00000007923	DNAJC11	DnaJ heat shock protein family (Hsp40) member C11
chr1	6844111	6845459	1349	*	MACS_peak_144	81.01	Promoter (<=1kb)	1	6845384	6932107	86724	1	23261	uc001aoh.3	0	ENSG00000171735	CAMTA1	calmodulin binding transcription activator 1
chr1	7015596	7018489	2894	*	MACS_peak_145	142.76	Intron (uc001aoi.3/23261, intron 3 of 22)	1	6845384	7829766	984383	1	23261	uc001aoi.3	170212	ENSG00000171735	CAMTA1	calmodulin binding transcription activator 1
chr1	7257975	7258890	916	*	MACS_peak_146	108.99	Intron (uc001aoi.3/23261, intron 4 of 22)	1	6845384	7829766	984383	1	23261	uc001aoi.3	412591	ENSG00000171735	CAMTA1	calmodulin binding transcription activator 1
chr1	7342474	7343366	893	*	MACS_peak_147	52.69	Intron (uc001aoi.3/23261, intron 5 of 22)	1	7732054	7805082	73029	1	23261	uc010nzv.1	-388688	ENSG00000171735	CAMTA1	calmodulin binding transcription activator 1
chr1	7421752	7422691	940	*	MACS_peak_148	190.44	Intron (uc001aoi.3/23261, intron 5 of 22)	1	7732054	7805082	73029	1	23261	uc010nzv.1	-309363	ENSG00000171735	CAMTA1	calmodulin binding transcription activator 1
chr1	7442712	7443526	815	*	MACS_peak_149	118.04	Intron (uc001aoi.3/23261, intron 5 of 22)	1	7732054	7805082	73029	1	23261	uc010nzv.1	-288528	ENSG00000171735	CAMTA1	calmodulin binding transcription activator 1
chr1	7497630	7498531	902	*	MACS_peak_150	253.62	Intron (uc001aoi.3/23261, intron 5 of 22)	1	7732054	7805082	73029	1	23261	uc010nzv.1	-233523	ENSG00000171735	CAMTA1	calmodulin binding transcription activator 1
chr1	7498578	7501194	2617	*	MACS_peak_151	88.03	Intron (uc001aoi.3/23261, intron 5 of 22)	1	7732054	7805082	73029	1	23261	uc010nzv.1	-230860	ENSG00000171735	CAMTA1	calmodulin binding transcription activator 1
chr1	7528764	7530259	1496	*	MACS_peak_152	64.27	Intron (uc001aoi.3/23261, intron 6 of 22)	1	7732054	7805082	73029	1	23261	uc010nzv.1	-201795	ENSG00000171735	CAMTA1	calmodulin binding transcription activator 1
chr1	7578395	7580085	1691	*	MACS_peak_153	50.26	Intron (uc001aoi.3/23261, intron 6 of 22)	1	7732054	7805082	73029	1	23261	uc010nzv.1	-151969	ENSG00000171735	CAMTA1	calmodulin binding transcription activator 1
chr1	7600947	7602114	1168	*	MACS_peak_154	661.77	Intron (uc001aoi.3/23261, intron 6 of 22)	1	7732054	7805082	73029	1	23261	uc010nzv.1	-129940	ENSG00000171735	CAMTA1	calmodulin binding transcription activator 1
chr1	7607810	7608530	721	*	MACS_peak_155	61.87	Intron (uc001aoi.3/23261, intron 6 of 22)	1	7732054	7805082	73029	1	23261	uc010nzv.1	-123524	ENSG00000171735	CAMTA1	calmodulin binding transcription activator 1
chr1	7640008	7641435	1428	*	MACS_peak_156	120.06	Intron (uc001aoi.3/23261, intron 6 of 22)	1	7732054	7805082	73029	1	23261	uc010nzv.1	-90619	ENSG00000171735	CAMTA1	calmodulin binding transcription activator 1
chr1	7665675	7666560	886	*	MACS_peak_157	97.96	Intron (uc001aoi.3/23261, intron 6 of 22)	1	7732054	7805082	73029	1	23261	uc010nzv.1	-65494	ENSG00000171735	CAMTA1	calmodulin binding transcription activator 1
chr1	7716808	7718775	1968	*	MACS_peak_158	698.79	Intron (uc001aoi.3/23261, intron 7 of 22)	1	7732054	7805082	73029	1	23261	uc010nzv.1	-13279	ENSG00000171735	CAMTA1	calmodulin binding transcription activator 1
chr1	7750367	7751533	1167	*	MACS_peak_159	553.04	Intron (uc001aoi.3/23261, intron 11 of 22)	1	7740148	7829766	89619	1	23261	uc001aok.4	10219	ENSG00000171735	CAMTA1	calmodulin binding transcription activator 1
chr1	7753464	7754371	908	*	MACS_peak_160	294.24	Intron (uc001aoi.3/23261, intron 11 of 22)	1	7740148	7829766	89619	1	23261	uc001aok.4	13316	ENSG00000171735	CAMTA1	calmodulin binding transcription activator 1
chr1	7761895	7763581	1687	*	MACS_peak_161	56.16	Intron (uc001aoi.3/23261, intron 11 of 22)	1	7740148	7829766	89619	1	23261	uc001aok.4	21747	ENSG00000171735	CAMTA1	calmodulin binding transcription activator 1
chr1	7843577	7845356	1780	*	MACS_peak_162	91.83	Promoter (<=1kb)	1	7844380	7864018	19639	1	8863	uc001aon.3	0	ENSG00000049246	PER3	period circadian regulator 3
chr1	7869169	7869476	308	*	MACS_peak_163	108.95	Intron (uc009vmg.1/8863, intron 11 of 18)	1	7844714	7905237	60524	1	8863	uc010nzw.2	24455	ENSG00000049246	PER3	period circadian regulator 3
chr1	7919421	7920579	1159	*	MACS_peak_164	142.77	Intron (uc001aoq.3/10911, intron 1 of 7)	1	7907672	7913565	5894	2	10911	uc001aos.3	-5856	ENSG00000049247	UTS2	urotensin 2
chr1	7962275	7963134	860	*	MACS_peak_165	88.42	Intron (uc001aoq.3/10911, intron 1 of 7)	1	7903143	7973294	70152	2	10911	uc001aoq.3	10160	ENSG00000049247	UTS2	urotensin 2
chr1	8085525	8087520	1996	*	MACS_peak_167	51.92	Promoter (<=1kb)	1	8071779	8086393	14615	2	54206	uc001aoz.3	0	ENSG00000116285	ERRFI1	ERBB receptor feedback inhibitor 1
chr1	8456717	8457569	853	*	MACS_peak_170	269.65	Intron (uc001apd.3/473, intron 2 of 12)	1	8412464	8483747	71284	2	473	uc001apd.3	26178	ENSG00000142599	RERE	arginine-glutamic acid dipeptide repeats
chr1	8521367	8522993	1627	*	MACS_peak_171	66.32	Intron (uc001ape.3/473, intron 12 of 23)	1	8412464	8483747	71284	2	473	uc001apd.3	-37620	ENSG00000142599	RERE	arginine-glutamic acid dipeptide repeats
chr1	8524212	8525369	1158	*	MACS_peak_172	55.56	3' UTR	1	8412464	8483747	71284	2	473	uc001apd.3	-40465	ENSG00000142599	RERE	arginine-glutamic acid dipeptide repeats
chr1	8611048	8612244	1197	*	MACS_peak_173	289	Intron (uc001ape.3/473, intron 7 of 23)	1	8420172	8585844	165673	2	473	uc010nzx.1	-25204	ENSG00000142599	RERE	arginine-glutamic acid dipeptide repeats
chr1	8612627	8613691	1065	*	MACS_peak_174	473.28	Intron (uc001ape.3/473, intron 7 of 23)	1	8420172	8585844	165673	2	473	uc010nzx.1	-26783	ENSG00000142599	RERE	arginine-glutamic acid dipeptide repeats
chr1	8739775	8740627	853	*	MACS_peak_175	217.85	Intron (uc001ape.3/473, intron 2 of 23)	1	8525030	8813897	288868	2	473	uc001aph.1	73270	ENSG00000142599	RERE	arginine-glutamic acid dipeptide repeats
chr1	8937701	8939892	2192	*	MACS_peak_177	88.59	Promoter (<=1kb)	1	8938894	8939943	1050	1	100505975	uc021oft.1	0	ENSG00000230679	ENO1-AS1	ENO1 antisense RNA 1
chr1	9097060	9099561	2502	*	MACS_peak_180	51.86	3' UTR	1	9097005	9109319	12315	2	6518	uc010nzy.2	9758	ENSG00000142583	SLC2A5	solute carrier family 2 member 5
chr1	9136154	9136979	826	*	MACS_peak_181	55.11	Intron (uc021ofv.1/6518, intron 2 of 4)	1	9101427	9129887	28461	2	6518	uc001app.4	-6267	ENSG00000142583	SLC2A5	solute carrier family 2 member 5
chr1	9179565	9181278	1714	*	MACS_peak_182	56.65	Intron (uc001apq.1/80045, intron 1 of 3)	1	9164476	9189229	24754	2	80045	uc001apq.1	7951	ENSG00000180758	GPR157	G protein-coupled receptor 157
chr1	9187108	9189339	2232	*	MACS_peak_183	80.46	Promoter (<=1kb)	1	9164476	9189229	24754	2	80045	uc001apq.1	0	ENSG00000180758	GPR157	G protein-coupled receptor 157
chr1	9222002	9224591	2590	*	MACS_peak_184	80.15	Intron (uc009vmq.3/uc009vmq.3, intron 1 of 1)	1	9211727	9211836	110	2	407040	uc021ofw.1	-10166	ENSG00000284357	MIR34A	microRNA 34a
chr1	9239843	9241658	1816	*	MACS_peak_185	51.02	Intron (uc009vmq.3/uc009vmq.3, intron 1 of 1)	1	9211727	9211836	110	2	407040	uc021ofw.1	-28007	ENSG00000284357	MIR34A	microRNA 34a
chr1	9362661	9366884	4224	*	MACS_peak_187	242.44	Intron (uc010oae.2/80176, intron 1 of 2)	1	9352941	9429590	76650	1	80176	uc010oae.2	9720	ENSG00000171621	SPSB1	splA/ryanodine receptor domain and SOCS box containing 1
chr1	9374927	9377514	2588	*	MACS_peak_188	116.87	Intron (uc010oae.2/80176, intron 1 of 2)	1	9352941	9429590	76650	1	80176	uc010oae.2	21986	ENSG00000171621	SPSB1	splA/ryanodine receptor domain and SOCS box containing 1
chr1	9381197	9383214	2018	*	MACS_peak_189	55.67	Intron (uc010oae.2/80176, intron 1 of 2)	1	9352941	9429590	76650	1	80176	uc010oae.2	28256	ENSG00000171621	SPSB1	splA/ryanodine receptor domain and SOCS box containing 1
chr1	9383475	9386809	3335	*	MACS_peak_190	61.24	Intron (uc010oae.2/80176, intron 1 of 2)	1	9415766	9429590	13825	1	80176	uc001apv.3	-28957	ENSG00000171621	SPSB1	splA/ryanodine receptor domain and SOCS box containing 1
chr1	9497321	9499604	2284	*	MACS_peak_192	70.5	Exon (uc021ofx.1/uc021ofx.1, exon 1 of 1)	1	9415766	9429590	13825	1	80176	uc001apv.3	81555	ENSG00000171621	SPSB1	splA/ryanodine receptor domain and SOCS box containing 1
chr1	9599150	9600649	1500	*	MACS_peak_195	121.04	Promoter (<=1kb)	1	9599528	9642831	43304	1	84275	uc001apw.3	0	ENSG00000171612	SLC25A33	solute carrier family 25 member 33
chr1	9660906	9664156	3251	*	MACS_peak_196	79.05	3' UTR	1	9656917	9674935	18019	1	199953	uc021ofz.1	3989	ENSG00000188807	TMEM201	transmembrane protein 201
chr1	9776515	9779635	3121	*	MACS_peak_197	231.9	5' UTR	1	9770163	9789172	19010	1	5293	uc001aqe.4	6352	ENSG00000171608	PIK3CD	phosphatidylinositol-4,5-bisphosphate 3-kinase catalytic subunit delta
chr1	9796843	9798705	1863	*	MACS_peak_198	62.3	Exon (uc001aqh.3/22883, exon 11 of 19)	1	9789079	9793604	4526	2	22883	uc001aqf.3	-3239	ENSG00000171603	CLSTN1	calsyntenin 1
chr1	9952379	9953536	1158	*	MACS_peak_199	52.63	Intron (uc001aqk.1/56998, intron 1 of 5)	1	9908334	9970316	61983	2	56998	uc001aqk.1	16780	ENSG00000178585	CTNNBIP1	catenin beta interacting protein 1
chr1	9960160	9961193	1034	*	MACS_peak_200	135.25	Intron (uc001aqk.1/56998, intron 1 of 5)	1	9908334	9970316	61983	2	56998	uc001aqk.1	9123	ENSG00000178585	CTNNBIP1	catenin beta interacting protein 1
chr1	10092414	10093870	1457	*	MACS_peak_201	1027.96	Promoter (<=1kb)	1	10093041	10241296	148256	1	10277	uc001aqr.4	0	ENSG00000130939	UBE4B	ubiquitination factor E4B
chr1	10105554	10106987	1434	*	MACS_peak_202	126.56	Intron (uc001aqr.4/10277, intron 1 of 26)	1	10093041	10241296	148256	1	10277	uc021ogc.1	12513	ENSG00000130939	UBE4B	ubiquitination factor E4B
chr1	10532193	10533133	941	*	MACS_peak_203	141.82	Promoter (<=1kb)	1	10520603	10532613	12011	2	1676	uc001arj.3	0	ENSG00000160049	DFFA	DNA fragmentation factor subunit alpha
chr1	10700951	10703363	2413	*	MACS_peak_204	93.76	Exon (uc001aro.4/54897, exon 19 of 21)	1	10718064	10721455	3392	2	54897	uc001arq.1	18092	ENSG00000130940	CASZ1	castor zinc finger 1
chr1	10712669	10715023	2355	*	MACS_peak_205	52.82	3' UTR	1	10718064	10721455	3392	2	54897	uc001arq.1	6432	ENSG00000130940	CASZ1	castor zinc finger 1
chr1	10720846	10724404	3559	*	MACS_peak_206	70.89	Promoter (<=1kb)	1	10718064	10721455	3392	2	54897	uc001arq.1	0	ENSG00000130940	CASZ1	castor zinc finger 1
chr1	11035439	11036488	1050	*	MACS_peak_209	84.45	Exon (uc010oao.2/148345, exon 2 of 13)	1	11006530	11042094	35565	2	148345	uc010oao.2	5606	ENSG00000175262	C1orf127	chromosome 1 open reading frame 127
chr1	11039237	11040225	989	*	MACS_peak_210	62.63	Promoter (1-2kb)	1	11006530	11042094	35565	2	148345	uc010oao.2	1869	ENSG00000175262	C1orf127	chromosome 1 open reading frame 127
chr1	11112752	11115378	2627	*	MACS_peak_211	88.51	3' UTR	1	11114649	11120091	5443	2	6723	uc001arz.1	4713	ENSG00000116649	SRM	spermidine synthase
chr1	11122829	11123803	975	*	MACS_peak_212	88.19	Promoter (2-3kb)	1	11114649	11120091	5443	2	6723	uc001arz.1	-2738	ENSG00000116649	SRM	spermidine synthase
chr1	11234128	11235016	889	*	MACS_peak_213	56.47	Intron (uc001asd.3/2475, intron 28 of 57)	1	11249346	11256038	6693	1	10218	uc001ase.4	-14330	ENSG00000171819	ANGPTL7	angiopoietin like 7
chr1	11246843	11248337	1495	*	MACS_peak_214	155.42	Promoter (1-2kb)	1	11249346	11256038	6693	1	10218	uc001ase.4	-1009	ENSG00000171819	ANGPTL7	angiopoietin like 7
chr1	11574346	11577863	3518	*	MACS_peak_219	64.47	Exon (uc001ash.4/57540, exon 4 of 21)	1	11561047	11586928	25882	1	57540	uc001asi.1	13299	ENSG00000204624	DISP3	dispatched RND transporter family member 3
chr1	11581457	11583785	2329	*	MACS_peak_220	101.98	Intron (uc001ash.4/57540, intron 10 of 20)	1	11561047	11586928	25882	1	57540	uc001asi.1	20410	ENSG00000204624	DISP3	dispatched RND transporter family member 3
chr1	11707697	11709072	1376	*	MACS_peak_225	185.33	3' UTR	1	11709144	11714401	5258	2	26232	uc009vnb.1	5329	ENSG00000116661	FBXO2	F-box protein 2
chr1	11735853	11738206	2354	*	MACS_peak_226	54.29	Exon (uc001asp.3/10459, exon 4 of 9)	1	11734537	11741495	6959	2	10459	uc001asp.3	3289	ENSG00000116670	MAD2L2	mitotic arrest deficient 2 like 2
chr1	11795634	11796866	1233	*	MACS_peak_227	756.34	Promoter (<=1kb)	1	11796142	11810828	14687	1	57085	uc001ast.3	0	ENSG00000177674	AGTRAP	angiotensin II receptor associated protein
chr1	11806928	11811986	5059	*	MACS_peak_228	122.09	3' UTR	1	11796142	11810828	14687	1	57085	uc001asx.3	10786	ENSG00000177674	AGTRAP	angiotensin II receptor associated protein
chr1	11865103	11866952	1850	*	MACS_peak_229	785.27	Promoter (<=1kb)	1	11866153	11876844	10692	1	1185	uc009vne.2	0	ENSG00000011021	CLCN6	chloride voltage-gated channel 6
chr1	11900987	11902951	1965	*	MACS_peak_230	256.18	Promoter (<=1kb)	1	11900376	11907674	7299	1	100379251	uc010oba.1	611	NA	NPPA-AS1	NPPA antisense RNA 1
chr1	11986348	11987384	1037	*	MACS_peak_233	50.57	Promoter (<=1kb)	1	11979645	11986485	6841	2	90231	uc001atk.3	0	ENSG00000116685	KIAA2013	KIAA2013
chr1	12000310	12001399	1090	*	MACS_peak_234	315.4	Intron (uc001atm.3/5351, intron 1 of 18)	1	11994724	12035599	40876	1	5351	uc010obb.2	5586	ENSG00000083444	PLOD1	procollagen-lysine,2-oxoglutarate 5-dioxygenase 1
chr1	12008895	12009799	905	*	MACS_peak_235	73.08	Intron (uc001atm.3/5351, intron 2 of 18)	1	11994724	12035599	40876	1	5351	uc010obb.2	14171	ENSG00000083444	PLOD1	procollagen-lysine,2-oxoglutarate 5-dioxygenase 1
chr1	12078956	12080139	1184	*	MACS_peak_236	81.98	Promoter (<=1kb)	1	12079299	12092106	12808	1	60672	uc001ato.2	0	ENSG00000116691	MIIP	migration and invasion inhibitory protein
chr1	12172109	12172943	835	*	MACS_peak_237	68.95	Intron (uc001atq.3/943, intron 7 of 14)	1	12185958	12204264	18307	1	943	uc001atr.3	-13015	ENSG00000120949	TNFRSF8	TNF receptor superfamily member 8
chr1	12202452	12204607	2156	*	MACS_peak_238	194.74	3' UTR	1	12185958	12204264	18307	1	943	uc001ats.3	16494	ENSG00000120949	TNFRSF8	TNF receptor superfamily member 8
chr1	12247507	12249767	2261	*	MACS_peak_241	160.23	Promoter (1-2kb)	1	12251762	12251839	78	1	100616438	uc021ogi.1	-1995	ENSG00000263676	MIR4632	microRNA 4632
chr1	12254160	12256065	1906	*	MACS_peak_242	139.52	Promoter (2-3kb)	1	12251762	12251839	78	1	100616438	uc021ogi.1	2398	ENSG00000263676	MIR4632	microRNA 4632
chr1	12375330	12376032	703	*	MACS_peak_243	74.09	Intron (uc001atv.3/55187, intron 30 of 69)	1	12371511	12398045	26535	1	55187	uc001aty.1	3819	ENSG00000048707	VPS13D	vacuolar protein sorting 13 homolog D
chr1	12424162	12424850	689	*	MACS_peak_244	141.95	Promoter (2-3kb)	1	12427725	12572098	144374	1	55187	uc009vnl.3	-2875	ENSG00000048707	VPS13D	vacuolar protein sorting 13 homolog D
chr1	12510146	12511178	1033	*	MACS_peak_245	270.2	Intron (uc001atv.3/55187, intron 65 of 69)	1	12469884	12572098	102215	1	55187	uc010obd.2	40262	ENSG00000048707	VPS13D	vacuolar protein sorting 13 homolog D
chr1	12537879	12539299	1421	*	MACS_peak_246	64.1	Intron (uc001atv.3/55187, intron 67 of 69)	1	12567300	12567451	152	1	677882	uc001atz.1	-28001	ENSG00000266079	SNORA59B	small nucleolar RNA, H/ACA box 59B
chr1	12667043	12667824	782	*	MACS_peak_250	89.21	Intron (uc001aub.3/9249, intron 1 of 5)	1	12627939	12676788	48850	2	9249	uc001aub.3	8964	ENSG00000162496	DHRS3	dehydrogenase/reductase 3
chr1	13829937	13830669	733	*	MACS_peak_253	105.16	Intron (uc001avb.3/126755, intron 1 of 1)	1	13801445	13840242	38798	2	126755	uc001avb.3	9573	ENSG00000162494	LRRC38	leucine rich repeat containing 38
chr1	13835759	13836583	825	*	MACS_peak_254	72.87	Intron (uc001avb.3/126755, intron 1 of 1)	1	13801445	13840242	38798	2	126755	uc001avb.3	3659	ENSG00000162494	LRRC38	leucine rich repeat containing 38
chr1	13908121	13909300	1180	*	MACS_peak_256	171.26	Promoter (<=1kb)	1	13910252	13944452	34201	1	10630	uc001avc.3	-952	ENSG00000162493	PDPN	podoplanin
chr1	14075216	14076733	1518	*	MACS_peak_258	58.78	Promoter (<=1kb)	1	14075856	14107358	31503	1	7799	uc021ogk.1	0	ENSG00000116731	PRDM2	PR/SET domain 2
chr1	14078040	14078763	724	*	MACS_peak_259	58.62	Promoter (2-3kb)	1	14075856	14151574	75719	1	7799	uc009vof.3	2184	ENSG00000116731	PRDM2	PR/SET domain 2
chr1	14933395	14934272	878	*	MACS_peak_275	141.98	Intron (uc009vog.1/23254, intron 1 of 7)	1	14925213	15444544	519332	1	23254	uc001avm.4	8182	ENSG00000189337	KAZN	kazrin, periplakin interacting protein
chr1	14962865	14964917	2053	*	MACS_peak_276	114.16	Intron (uc009vog.1/23254, intron 1 of 7)	1	14925213	15444544	519332	1	23254	uc001avm.4	37652	ENSG00000189337	KAZN	kazrin, periplakin interacting protein
chr1	15036031	15037020	990	*	MACS_peak_277	89.81	Intron (uc009vog.1/23254, intron 1 of 7)	1	14925213	15444544	519332	1	23254	uc001avm.4	110818	ENSG00000189337	KAZN	kazrin, periplakin interacting protein
chr1	15105085	15105958	874	*	MACS_peak_278	135.5	Intron (uc009vog.1/23254, intron 1 of 7)	1	15250625	15394651	144027	1	23254	uc001avo.2	-144667	ENSG00000189337	KAZN	kazrin, periplakin interacting protein
chr1	15117534	15120067	2534	*	MACS_peak_279	87.14	Intron (uc009vog.1/23254, intron 1 of 7)	1	15250625	15394651	144027	1	23254	uc001avo.2	-130558	ENSG00000189337	KAZN	kazrin, periplakin interacting protein
chr1	15135237	15135983	747	*	MACS_peak_280	81.48	Intron (uc009vog.1/23254, intron 1 of 7)	1	15250625	15394651	144027	1	23254	uc001avo.2	-114642	ENSG00000189337	KAZN	kazrin, periplakin interacting protein
chr1	15146588	15147483	896	*	MACS_peak_281	154.88	Intron (uc009vog.1/23254, intron 1 of 7)	1	15250625	15394651	144027	1	23254	uc001avo.2	-103142	ENSG00000189337	KAZN	kazrin, periplakin interacting protein
chr1	15256797	15257716	920	*	MACS_peak_282	160.79	Promoter (<=1kb)	1	15256296	15394651	138356	1	23254	uc001avp.2	501	ENSG00000189337	KAZN	kazrin, periplakin interacting protein
chr1	15265596	15267019	1424	*	MACS_peak_283	74.02	Intron (uc009vog.1/23254, intron 1 of 7)	1	15272415	15394651	122237	1	23254	uc001avq.2	-5396	ENSG00000189337	KAZN	kazrin, periplakin interacting protein
chr1	15288037	15289450	1414	*	MACS_peak_284	78.54	Promoter (<=1kb)	1	15287180	15394651	107472	1	23254	uc001avr.2	857	ENSG00000189337	KAZN	kazrin, periplakin interacting protein
chr1	15294394	15295914	1521	*	MACS_peak_285	330	Intron (uc009vog.1/23254, intron 2 of 7)	1	15287180	15394651	107472	1	23254	uc001avr.2	7214	ENSG00000189337	KAZN	kazrin, periplakin interacting protein
chr1	15296456	15297424	969	*	MACS_peak_286	148.22	Intron (uc009vog.1/23254, intron 2 of 7)	1	15287180	15394651	107472	1	23254	uc001avr.2	9276	ENSG00000189337	KAZN	kazrin, periplakin interacting protein
chr1	15322386	15323705	1320	*	MACS_peak_287	106.06	Intron (uc009vog.1/23254, intron 2 of 7)	1	15287180	15394651	107472	1	23254	uc001avr.2	35206	ENSG00000189337	KAZN	kazrin, periplakin interacting protein
chr1	15348818	15350415	1598	*	MACS_peak_288	81.32	Intron (uc009vog.1/23254, intron 2 of 7)	1	15287180	15394651	107472	1	23254	uc001avr.2	61638	ENSG00000189337	KAZN	kazrin, periplakin interacting protein
chr1	15382227	15385119	2893	*	MACS_peak_289	50.76	Exon (uc009vog.1/23254, exon 5 of 8)	1	15427704	15444544	16841	1	23254	uc001avs.4	-42585	ENSG00000189337	KAZN	kazrin, periplakin interacting protein
chr1	15432498	15433893	1396	*	MACS_peak_290	145.17	Intron (uc001avm.4/23254, intron 13 of 14)	1	15427704	15444544	16841	1	23254	uc001avs.4	4794	ENSG00000189337	KAZN	kazrin, periplakin interacting protein
chr1	15438119	15439767	1649	*	MACS_peak_291	291.78	Exon (uc001avm.4/23254, exon 14 of 15)	1	15427704	15444544	16841	1	23254	uc001avs.4	10415	ENSG00000189337	KAZN	kazrin, periplakin interacting protein
chr1	15459249	15460168	920	*	MACS_peak_292	56.27	Intron (uc001avv.4/200197, intron 1 of 4)	1	15438311	15478960	40650	2	200197	uc001avv.4	18792	ENSG00000175147	TMEM51-AS1	TMEM51 antisense RNA 1
chr1	15498286	15499540	1255	*	MACS_peak_293	64.1	Intron (uc001avw.4/55092, intron 1 of 3)	1	15480229	15546974	66746	1	55092	uc001avy.3	18057	ENSG00000171729	TMEM51	transmembrane protein 51
chr1	15505052	15507341	2290	*	MACS_peak_294	225.84	Intron (uc001avw.4/55092, intron 1 of 3)	1	15480229	15546974	66746	1	55092	uc001avy.3	24823	ENSG00000171729	TMEM51	transmembrane protein 51
chr1	15514085	15515717	1633	*	MACS_peak_295	66.07	Intron (uc001avw.4/55092, intron 1 of 3)	1	15480229	15546974	66746	1	55092	uc001avy.3	33856	ENSG00000171729	TMEM51	transmembrane protein 51
chr1	15571060	15571849	790	*	MACS_peak_297	62.56	Promoter (1-2kb)	1	15573768	15672019	98252	1	114827	uc001awa.1	-1919	ENSG00000142621	FHAD1	forkhead associated phosphopeptide binding domain 1
chr1	15586591	15588260	1670	*	MACS_peak_298	66.96	Intron (uc001awa.1/114827, intron 2 of 15)	1	15573768	15724622	150855	1	114827	uc001awb.2	12823	ENSG00000142621	FHAD1	forkhead associated phosphopeptide binding domain 1
chr1	15603124	15604206	1083	*	MACS_peak_299	67.65	Intron (uc001awa.1/114827, intron 3 of 15)	1	15573768	15724622	150855	1	114827	uc001awb.2	29356	ENSG00000142621	FHAD1	forkhead associated phosphopeptide binding domain 1
chr1	15605799	15606699	901	*	MACS_peak_300	185.34	Intron (uc001awa.1/114827, intron 3 of 15)	1	15573768	15724622	150855	1	114827	uc001awb.2	32031	ENSG00000142621	FHAD1	forkhead associated phosphopeptide binding domain 1
chr1	15638795	15640027	1233	*	MACS_peak_301	68.41	Exon (uc001awa.1/114827, exon 7 of 16)	1	15668232	15711054	42823	1	114827	uc001awd.1	-28205	ENSG00000142621	FHAD1	forkhead associated phosphopeptide binding domain 1
chr1	15661010	15662108	1099	*	MACS_peak_302	70.8	Intron (uc001awa.1/114827, intron 12 of 15)	1	15668232	15711054	42823	1	114827	uc001awd.1	-6124	ENSG00000142621	FHAD1	forkhead associated phosphopeptide binding domain 1
chr1	15688392	15689584	1193	*	MACS_peak_303	88.35	Exon (uc001awb.2/114827, exon 22 of 31)	1	15684287	15690812	6526	1	114827	uc001awf.3	4105	ENSG00000142621	FHAD1	forkhead associated phosphopeptide binding domain 1
chr1	15703204	15704750	1547	*	MACS_peak_304	185.76	Promoter (2-3kb)	1	15707197	15726778	19582	1	114827	uc001awg.3	-2447	ENSG00000142621	FHAD1	forkhead associated phosphopeptide binding domain 1
chr1	15810103	15811055	953	*	MACS_peak_305	160.85	Intron (uc001awl.3/51032, intron 5 of 7)	1	15802596	15817895	15300	1	51032	uc001awl.3	7507	ENSG00000215704	CELA2B	chymotrypsin like elastase family member 2B
chr1	15846308	15847148	841	*	MACS_peak_306	81.23	Intron (uc001awm.2/842, intron 1 of 7)	1	15817324	15850940	33617	2	842	uc001awm.2	3792	ENSG00000132906	CASP9	caspase 9
chr1	15852661	15854085	1425	*	MACS_peak_307	827.29	Promoter (<=1kb)	1	15853352	15893091	39740	1	23341	uc001awr.1	0	ENSG00000116138	DNAJC16	DnaJ heat shock protein family (Hsp40) member C16
chr1	15956677	15957554	878	*	MACS_peak_310	73.51	Promoter (<=1kb)	1	15956820	15987552	30733	1	84301	uc009voj.2	0	ENSG00000197312	DDI2	DNA damage inducible 1 homolog 2
chr1	16044291	16045445	1155	*	MACS_peak_312	58.81	Exon (uc010obo.2/23207, exon 4 of 20)	1	16062809	16067884	5076	1	284723	uc001axb.1	-17364	ENSG00000162461	SLC25A34	solute carrier family 25 member 34
chr1	16160805	16163033	2229	*	MACS_peak_313	70.56	Exon (uc001axj.2/729614, exon 2 of 2)	1	16174359	16266950	92592	1	23013	uc001axk.1	-11326	ENSG00000065526	SPEN	spen family transcriptional repressor
chr1	16340970	16343089	2120	*	MACS_peak_314	60.3	Promoter (2-3kb)	1	16340523	16345285	4763	2	27129	uc001axo.2	2196	ENSG00000173641	HSPB7	heat shock protein family B (small) member 7
chr1	16521332	16522209	878	*	MACS_peak_318	453.99	Downstream (2-3kb)	1	16524599	16533705	9107	2	128272	uc009voo.2	11496	ENSG00000142632	ARHGEF19	Rho guanine nucleotide exchange factor 19
chr1	17122691	17123783	1093	*	MACS_peak_320	125.64	Intron (uc009voy.1/9696, intron 1 of 8)	1	17081129	17090975	9847	2	11223	uc010ock.3	-31716	NA	MST1L	macrophage stimulating 1 like
chr1	17199059	17200638	1580	*	MACS_peak_321	64.28	Exon (uc021ohf.2/uc021ohf.2, exon 1 of 2)	1	17185444	17185516	73	2	100500876	uc021ohc.1	-13543	ENSG00000263811	MIR3675	microRNA 3675
chr1	17247173	17250052	2880	*	MACS_peak_322	493.01	Promoter (<=1kb)	1	17248445	17299474	51030	1	9696	uc001azt.2	0	ENSG00000058453	CROCC	ciliary rootlet coiled-coil, rootletin
chr1	17301483	17306509	5027	*	MACS_peak_323	102.55	Promoter (<=1kb)	1	17300999	17307173	6175	2	4237	uc001azw.3	664	ENSG00000117122	MFAP2	microfibril associated protein 2
chr1	17342503	17343443	941	*	MACS_peak_324	69.85	Downstream (1-2kb)	1	17312453	17338423	25971	2	23400	uc001bac.2	-4080	ENSG00000159363	ATP13A2	ATPase 13A2
chr1	17406469	17407256	788	*	MACS_peak_326	348.12	Intron (uc001baf.3/11240, intron 10 of 15)	1	17345225	17380665	35441	2	6390	uc001bae.3	-25804	ENSG00000117118	SDHB	succinate dehydrogenase complex iron sulfur subunit B
chr1	17415455	17417375	1921	*	MACS_peak_327	165.32	Intron (uc001baf.3/11240, intron 6 of 15)	1	17393256	17445948	52693	2	11240	uc001baf.3	28573	ENSG00000117115	PADI2	peptidyl arginine deiminase 2
chr1	17544899	17546471	1573	*	MACS_peak_331	136.4	Intron (uc001bah.1/29943, intron 1 of 15)	1	17531621	17572501	40881	1	29943	uc001bah.1	13278	ENSG00000142623	PADI1	peptidyl arginine deiminase 1
chr1	17586493	17587872	1380	*	MACS_peak_332	88.36	Intron (uc001bai.3/51702, intron 2 of 15)	1	17575593	17610727	35135	1	51702	uc001bai.3	10900	ENSG00000142619	PADI3	peptidyl arginine deiminase 3
chr1	17703455	17705280	1826	*	MACS_peak_335	492.53	Intron (uc001bak.1/353238, intron 3 of 16)	1	17698741	17728195	29455	1	353238	uc001bak.1	4714	ENSG00000276747	PADI6	peptidyl arginine deiminase 6
chr1	17857512	17859087	1576	*	MACS_peak_336	68.1	Intron (uc031pli.1/55160, intron 1 of 1)	1	17866330	18016673	150344	1	55160	uc009vpe.1	-7243	ENSG00000074964	ARHGEF10L	Rho guanine nucleotide exchange factor 10 like
chr1	17878103	17879128	1026	*	MACS_peak_337	103.06	Intron (uc031pli.1/55160, intron 1 of 1)	1	17866330	18024370	158041	1	55160	uc001ban.3	11773	ENSG00000074964	ARHGEF10L	Rho guanine nucleotide exchange factor 10 like
chr1	17885718	17886684	967	*	MACS_peak_338	78.43	Intron (uc031pli.1/55160, intron 1 of 1)	1	17866330	18024370	158041	1	55160	uc001ban.3	19388	ENSG00000074964	ARHGEF10L	Rho guanine nucleotide exchange factor 10 like
chr1	17999340	18003188	3849	*	MACS_peak_339	290.91	Intron (uc009vpe.1/55160, intron 25 of 26)	1	18020542	18024370	3829	1	55160	uc001bas.3	-17354	ENSG00000074964	ARHGEF10L	Rho guanine nucleotide exchange factor 10 like
chr1	18018845	18021628	2784	*	MACS_peak_340	63.94	Promoter (<=1kb)	1	18020542	18024370	3829	1	55160	uc001bas.3	0	ENSG00000074964	ARHGEF10L	Rho guanine nucleotide exchange factor 10 like
chr1	18468584	18470148	1565	*	MACS_peak_348	50.23	Intron (uc001bau.2/84966, intron 1 of 9)	1	18434240	18704977	270738	1	84966	uc001bau.2	34344	ENSG00000117154	IGSF21	immunoglobin superfamily member 21
chr1	18565711	18566846	1136	*	MACS_peak_349	76.79	Intron (uc001bau.2/84966, intron 2 of 9)	1	18687861	18704977	17117	1	84966	uc001bav.2	-121015	ENSG00000117154	IGSF21	immunoglobin superfamily member 21
chr1	18568003	18569856	1854	*	MACS_peak_350	140.13	Intron (uc001bau.2/84966, intron 2 of 9)	1	18687861	18704977	17117	1	84966	uc001bav.2	-118005	ENSG00000117154	IGSF21	immunoglobin superfamily member 21
chr1	18672444	18674172	1729	*	MACS_peak_351	154.78	Intron (uc001bau.2/84966, intron 4 of 9)	1	18687861	18704977	17117	1	84966	uc001bav.2	-13689	ENSG00000117154	IGSF21	immunoglobin superfamily member 21
chr1	18682137	18683006	870	*	MACS_peak_352	92.61	Intron (uc001bau.2/84966, intron 4 of 9)	1	18687861	18704977	17117	1	84966	uc001bav.2	-4855	ENSG00000117154	IGSF21	immunoglobin superfamily member 21
chr1	19063297	19064821	1525	*	MACS_peak_364	54.07	Intron (uc010oct.2/5081, intron 8 of 8)	1	18957500	19075360	117861	1	5081	uc010oct.2	105797	ENSG00000009709	PAX7	paired box 7
chr1	19178584	19179700	1117	*	MACS_peak_366	73.69	Intron (uc001bba.1/80834, intron 3 of 5)	1	19166093	19186155	20063	2	80834	uc001bba.1	6455	ENSG00000179002	TAS1R2	taste 1 receptor member 2
chr1	19187425	19189146	1722	*	MACS_peak_367	167.32	Promoter (1-2kb)	1	19166093	19186155	20063	2	80834	uc001bba.1	-1270	ENSG00000179002	TAS1R2	taste 1 receptor member 2
chr1	19267212	19269025	1814	*	MACS_peak_368	60.33	Intron (uc001bbd.2/126917, intron 1 of 8)	1	19230774	19282826	52053	2	126917	uc001bbd.2	13801	ENSG00000169991	IFFO2	intermediate filament family orphan 2
chr1	19273091	19274010	920	*	MACS_peak_369	90.93	Intron (uc001bbd.2/126917, intron 1 of 8)	1	19230774	19282826	52053	2	126917	uc001bbd.2	8816	ENSG00000169991	IFFO2	intermediate filament family orphan 2
chr1	19524927	19525631	705	*	MACS_peak_374	220.4	Exon (uc001bbi.3/23352, exon 4 of 106)	1	19401000	19536746	135747	2	23352	uc001bbi.3	11115	ENSG00000127481	UBR4	ubiquitin protein ligase E3 component n-recognin 4
chr1	19638063	19639513	1451	*	MACS_peak_375	76.22	Promoter (<=1kb)	1	19638740	19655794	17055	1	54896	uc001bby.3	0	ENSG00000040487	PQLC2	PQ loop repeat containing 2
chr1	19724839	19726340	1502	*	MACS_peak_376	104.26	Intron (uc010ocz.2/832, intron 2 of 8)	1	19665267	19811201	145935	2	832	uc010ocz.2	84861	ENSG00000077549	CAPZB	capping actin protein of muscle Z-line beta subunit
chr1	19752192	19753867	1676	*	MACS_peak_377	76.63	Intron (uc010ocz.2/832, intron 1 of 8)	1	19665267	19811201	145935	2	832	uc010ocz.2	57334	ENSG00000077549	CAPZB	capping actin protein of muscle Z-line beta subunit
chr1	19756074	19757751	1678	*	MACS_peak_378	111.76	Intron (uc010ocz.2/832, intron 1 of 8)	1	19665267	19811201	145935	2	832	uc010ocz.2	53450	ENSG00000077549	CAPZB	capping actin protein of muscle Z-line beta subunit
chr1	19765572	19766634	1063	*	MACS_peak_379	83.38	Intron (uc010ocz.2/832, intron 1 of 8)	1	19665267	19811201	145935	2	832	uc010ocz.2	44567	ENSG00000077549	CAPZB	capping actin protein of muscle Z-line beta subunit
chr1	19791973	19793437	1465	*	MACS_peak_380	59.95	Intron (uc010ocz.2/832, intron 1 of 8)	1	19665267	19811201	145935	2	832	uc010ocz.2	17764	ENSG00000077549	CAPZB	capping actin protein of muscle Z-line beta subunit
chr1	19797548	19798163	616	*	MACS_peak_381	69.72	Intron (uc010ocz.2/832, intron 1 of 8)	1	19665267	19811201	145935	2	832	uc010ocz.2	13038	ENSG00000077549	CAPZB	capping actin protein of muscle Z-line beta subunit
chr1	19922873	19924574	1702	*	MACS_peak_384	69.94	Promoter (<=1kb)	1	19923471	19984949	61479	1	100532736	uc009vpl.2	0	ENSG00000270136	MINOS1-NBL1	MINOS1-NBL1 readthrough
chr1	20016351	20017476	1126	*	MACS_peak_385	54.54	Intron (uc001bcn.3/255104, intron 15 of 15)	1	19991780	20006055	14276	1	3362	uc001bcl.3	24571	ENSG00000158748	HTR6	5-hydroxytryptamine receptor 6
chr1	20039125	20039984	860	*	MACS_peak_386	62.68	Intron (uc001bcn.3/255104, intron 13 of 15)	1	19991780	20006055	14276	1	3362	uc001bcl.3	47345	ENSG00000158748	HTR6	5-hydroxytryptamine receptor 6
chr1	20065891	20067607	1717	*	MACS_peak_387	56.35	Exon (uc001bcn.3/255104, exon 11 of 16)	1	20008735	20125837	117103	2	255104	uc001bco.1	58230	ENSG00000162542	TMCO4	transmembrane and coiled-coil domains 4
chr1	20070324	20071597	1274	*	MACS_peak_388	72.51	3' UTR	1	20008735	20125837	117103	2	255104	uc001bco.1	54240	ENSG00000162542	TMCO4	transmembrane and coiled-coil domains 4
chr1	20142247	20143463	1217	*	MACS_peak_389	186.47	Promoter (<=1kb)	1	20140522	20141771	1250	2	54546	uc001bcr.3	-476	ENSG00000178828	RNF186	ring finger protein 186
chr1	20208381	20209452	1072	*	MACS_peak_391	206.18	Promoter (<=1kb)	1	20208888	20239437	30550	1	23252	uc001bcs.4	0	ENSG00000169914	OTUD3	OTU deubiquitinase 3
chr1	20307978	20308841	864	*	MACS_peak_394	66.55	Promoter (1-2kb)	1	20301924	20306932	5009	2	5320	uc010odb.2	-1046	ENSG00000188257	PLA2G2A	phospholipase A2 group IIA
chr1	20402476	20403389	914	*	MACS_peak_395	160.16	Intron (uc001bcx.3/5322, intron 6 of 9)	1	20396701	20418394	21694	1	5322	uc001bcy.3	5775	ENSG00000127472	PLA2G5	phospholipase A2 group V
chr1	20465713	20468369	2657	*	MACS_peak_396	58.55	Promoter (<=1kb)	1	20465823	20476879	11057	1	64600	uc009vpp.1	0	ENSG00000158786	PLA2G2F	phospholipase A2 group IIF
chr1	20619995	20620873	879	*	MACS_peak_398	61.52	Promoter (2-3kb)	1	20617412	20681387	63976	1	127731	uc010odc.1	2583	ENSG00000158816	VWA5B1	von Willebrand factor A domain containing 5B1
chr1	20982685	20983854	1170	*	MACS_peak_404	81.11	Intron (uc001bdo.1/1650, intron 2 of 10)	1	20978260	20988037	9778	2	1650	uc001bdo.1	4183	ENSG00000244038	DDOST	dolichyl-diphosphooligosaccharide--protein glycosyltransferase non-catalytic subunit
chr1	21058378	21060208	1831	*	MACS_peak_405	73.65	Promoter (<=1kb)	1	21046225	21059133	12909	2	400745	uc001bdt.1	0	ENSG00000189410	SH2D5	SH2 domain containing 5
chr1	21179753	21180520	768	*	MACS_peak_406	158.58	Exon (uc010odi.2/8672, exon 16 of 26)	1	21080551	21113799	33249	2	50809	uc001bea.2	-65954	ENSG00000127483	HP1BP3	heterochromatin protein 1 binding protein 3
chr1	21344850	21345720	871	*	MACS_peak_407	64.33	Intron (uc009vpz.3/8672, intron 1 of 29)	1	21132785	21377487	244703	2	8672	uc009vpz.3	31767	ENSG00000075151	EIF4G3	eukaryotic translation initiation factor 4 gamma 3
chr1	21356439	21357166	728	*	MACS_peak_408	90.99	Intron (uc009vpz.3/8672, intron 1 of 29)	1	21132785	21377487	244703	2	8672	uc009vpz.3	20321	ENSG00000075151	EIF4G3	eukaryotic translation initiation factor 4 gamma 3
chr1	21643333	21645107	1775	*	MACS_peak_410	278.47	Intron (uc001bem.2/1889, intron 1 of 18)	1	21619783	21626362	6580	1	100506801	uc001beo.2	23550	ENSG00000231105	LOC100506801	uncharacterized LOC100506801
chr1	21660371	21662789	2419	*	MACS_peak_411	79.32	Intron (uc001bem.2/1889, intron 1 of 18)	1	21543740	21672034	128295	2	1889	uc001bem.2	9245	ENSG00000117298	ECE1	endothelin converting enzyme 1
chr1	21834183	21835800	1618	*	MACS_peak_413	111.79	Promoter (<=1kb)	1	21835858	21904905	69048	1	249	uc001bet.3	-58	ENSG00000162551	ALPL	alkaline phosphatase, liver/bone/kidney
chr1	21950855	21952018	1164	*	MACS_peak_416	75.64	Promoter (1-2kb)	1	21943799	21949011	5213	2	5909	uc001bez.1	-1844	ENSG00000076864	RAP1GAP	RAP1 GTPase activating protein
chr1	21952483	21953925	1443	*	MACS_peak_417	56.88	5' UTR	1	21943799	21949011	5213	2	5909	uc001bez.1	-3472	ENSG00000076864	RAP1GAP	RAP1 GTPase activating protein
chr1	21973879	21975900	2022	*	MACS_peak_418	81.04	Promoter (2-3kb)	1	21922708	21978348	55641	2	5909	uc001bew.3	2448	ENSG00000076864	RAP1GAP	RAP1 GTPase activating protein
chr1	21976843	21978508	1666	*	MACS_peak_419	86.73	Promoter (<=1kb)	1	21922708	21978348	55641	2	5909	uc001bew.3	0	ENSG00000076864	RAP1GAP	RAP1 GTPase activating protein
chr1	22032724	22033554	831	*	MACS_peak_420	74.6	Promoter (1-2kb)	1	22012385	22031108	18724	2	84196	uc001bfd.1	-1616	ENSG00000090686	USP48	ubiquitin specific peptidase 48
chr1	22101725	22102430	706	*	MACS_peak_421	67.67	Intron (uc001bfb.3/84196, intron 1 of 26)	1	22004792	22109688	104897	2	84196	uc001bfb.3	7258	ENSG00000090686	USP48	ubiquitin specific peptidase 48
chr1	22107759	22110577	2819	*	MACS_peak_422	50.59	Promoter (<=1kb)	1	22004792	22109688	104897	2	84196	uc001bfb.3	0	ENSG00000090686	USP48	ubiquitin specific peptidase 48
chr1	22195882	22197643	1762	*	MACS_peak_424	70.47	Intron (uc001bfj.3/3339, intron 33 of 96)	1	22213708	22222803	9096	2	3339	uc009vqe.1	25160	ENSG00000142798	HSPG2	heparan sulfate proteoglycan 2
chr1	22197850	22201462	3613	*	MACS_peak_425	69.92	Exon (uc001bfj.3/3339, exon 26 of 97)	1	22213708	22222803	9096	2	3339	uc009vqe.1	21341	ENSG00000142798	HSPG2	heparan sulfate proteoglycan 2
chr1	22446146	22450237	4092	*	MACS_peak_430	208.1	3' UTR	1	22443798	22469519	25722	2	54361	uc001bfs.4	19282	ENSG00000162552	WNT4	Wnt family member 4
chr1	22777858	22779152	1295	*	MACS_peak_438	257.85	Promoter (<=1kb)	1	22778344	22857650	79307	1	9923	uc001bft.2	0	ENSG00000184677	ZBTB40	zinc finger and BTB domain containing 40
chr1	22903836	22906616	2781	*	MACS_peak_439	87.78	Intron (uc001bfw.3/2046, intron 3 of 4)	1	22890004	22930087	40084	1	2046	uc001bfx.1	13832	ENSG00000070886	EPHA8	EPH receptor A8
chr1	22986831	22988638	1808	*	MACS_peak_440	79.79	3' UTR	1	22979682	22988029	8348	1	713	uc001bgd.3	7149	ENSG00000173369	C1QB	complement C1q B chain
chr1	23079445	23080694	1250	*	MACS_peak_441	161.29	Intron (uc009vqj.1/2048, intron 1 of 16)	1	23046010	23046091	82	1	100616391	uc021oib.1	33435	ENSG00000265422	MIR4684	microRNA 4684
chr1	23154500	23156264	1765	*	MACS_peak_442	94.85	Intron (uc009vqj.1/2048, intron 3 of 16)	1	23189652	23189719	68	2	100422914	uc021oic.1	33455	ENSG00000264014	MIR4253	microRNA 4253
chr1	23184379	23185552	1174	*	MACS_peak_443	55.5	Intron (uc009vqj.1/2048, intron 3 of 16)	1	23189652	23189719	68	2	100422914	uc021oic.1	4167	ENSG00000264014	MIR4253	microRNA 4253
chr1	23191152	23193105	1954	*	MACS_peak_444	70.56	Promoter (1-2kb)	1	23189652	23189719	68	2	100422914	uc021oic.1	-1433	ENSG00000264014	MIR4253	microRNA 4253
chr1	23380823	23381726	904	*	MACS_peak_446	72.38	Exon (uc001bgi.2/23028, exon 5 of 19)	1	23370798	23370865	68	1	100422866	uc021oid.1	10025	ENSG00000263793	MIR3115	microRNA 3115
chr1	23472529	23473345	817	*	MACS_peak_447	184.97	Intron (uc001bgk.2/7798, intron 1 of 4)	1	23410516	23495517	85002	2	7798	uc001bgk.2	22172	ENSG00000169641	LUZP1	leucine zipper protein 1
chr1	23505590	23507578	1989	*	MACS_peak_448	59.73	Promoter (1-2kb)	1	23417683	23504301	86619	2	7798	uc001bgm.1	-1289	ENSG00000169641	LUZP1	leucine zipper protein 1
chr1	23514560	23516020	1461	*	MACS_peak_449	83.58	Downstream (2-3kb)	1	23518388	23521222	2835	2	3352	uc001bgn.3	5202	ENSG00000179546	HTR1D	5-hydroxytryptamine receptor 1D
chr1	23709909	23711229	1321	*	MACS_peak_452	172.26	3' UTR	1	23710671	23720526	9856	2	6920	uc009vqm.2	9297	ENSG00000204219	TCEA3	transcription elongation factor A3
chr1	23805279	23805982	704	*	MACS_peak_453	90.32	Intron (uc010odz.1/55616, intron 1 of 24)	1	23755056	23810677	55622	2	55616	uc010odz.1	4695	ENSG00000088280	ASAP3	ArfGAP with SH3 domain, ankyrin repeat and PH domain 3
chr1	23881161	23882388	1228	*	MACS_peak_454	51.42	Downstream (2-3kb)	1	23884421	23886285	1865	2	3399	uc001bhh.4	3897	ENSG00000117318	ID3	inhibitor of DNA binding 3, HLH protein
chr1	24069324	24070878	1555	*	MACS_peak_456	51.37	Promoter (<=1kb)	1	24069856	24088549	18694	1	6924	uc001bho.3	0	ENSG00000011007	ELOA	elongin A
chr1	24111175	24112054	880	*	MACS_peak_457	94.82	Intron (uc001bhq.3/57095, intron 3 of 5)	1	24117646	24122029	4384	1	11313	uc001bht.3	-5592	ENSG00000011009	LYPLA2	lysophospholipase II
chr1	24125712	24127848	2137	*	MACS_peak_458	80.14	Promoter (<=1kb)	1	24122089	24126060	3972	2	2582	uc009vqo.1	0	ENSG00000117308	GALE	UDP-galactose-4-epimerase
chr1	24136066	24136875	810	*	MACS_peak_459	50.75	Intron (uc001bib.3/3155, intron 6 of 8)	1	24130890	24144073	13184	2	3155	uc021oii.1	7198	ENSG00000117305	HMGCL	3-hydroxymethyl-3-methylglutaryl-CoA lyase
chr1	24151475	24152281	807	*	MACS_peak_460	56.47	Promoter (<=1kb)	1	24128367	24151949	23583	2	3155	uc001bib.3	0	ENSG00000117305	HMGCL	3-hydroxymethyl-3-methylglutaryl-CoA lyase
chr1	24193753	24195809	2057	*	MACS_peak_461	78.53	Promoter (<=1kb)	1	24171572	24194859	23288	2	2517	uc001bie.3	0	ENSG00000179163	FUCA1	alpha-L-fucosidase 1
chr1	24226431	24227024	594	*	MACS_peak_462	146.57	Intron (uc001bif.3/1269, intron 1 of 1)	1	24200460	24239817	39358	2	1269	uc001bif.3	12793	ENSG00000188822	CNR2	cannabinoid receptor 2
chr1	24237234	24238189	956	*	MACS_peak_463	84.53	Promoter (1-2kb)	1	24200460	24239817	39358	2	1269	uc001bif.3	1628	ENSG00000188822	CNR2	cannabinoid receptor 2
chr1	24511785	24513108	1324	*	MACS_peak_464	54.76	Promoter (<=1kb)	1	24480647	24513765	33119	2	163702	uc001bir.3	657	ENSG00000185436	IFNLR1	interferon lambda receptor 1
chr1	24762109	24763037	929	*	MACS_peak_466	401.2	Intron (uc010oek.2/57185, intron 2 of 7)	1	24782628	24792864	10237	1	57185	uc001bji.3	-19591	ENSG00000001461	NIPAL3	NIPA like domain containing 3
chr1	24833385	24834644	1260	*	MACS_peak_467	154.72	Promoter (<=1kb)	1	24834084	24863510	29427	1	11123	uc021ojg.1	0	ENSG00000117602	RCAN3	RCAN family member 3
chr1	24966118	24967376	1259	*	MACS_peak_469	71.5	Promoter (2-3kb)	1	24969594	24999772	30179	1	10250	uc001bjm.3	-2218	ENSG00000133226	SRRM1	serine and arginine repetitive matrix 1
chr1	25236970	25239310	2341	*	MACS_peak_475	360.77	Intron (uc001bjq.3/864, intron 3 of 4)	1	25226002	25256770	30769	2	864	uc001bjq.3	17460	ENSG00000020633	RUNX3	runt related transcription factor 3
chr1	25265429	25266988	1560	*	MACS_peak_476	55.44	Intron (uc009vrj.3/864, intron 2 of 6)	1	25226002	25256770	30769	2	864	uc010oen.2	-8659	ENSG00000020633	RUNX3	runt related transcription factor 3
chr1	25558420	25560168	1749	*	MACS_peak_485	143.54	Promoter (<=1kb)	1	25548767	25559013	10247	2	25949	uc001bjt.1	0	ENSG00000117614	SYF2	SYF2 pre-mRNA splicing factor
chr1	25889812	25890994	1183	*	MACS_peak_486	294.77	Promoter (<=1kb)	1	25889298	25895377	6080	1	26119	uc009vrx.3	514	ENSG00000157978	LDLRAP1	low density lipoprotein receptor adaptor protein 1
chr1	26041187	26042253	1067	*	MACS_peak_487	261.59	Intron (uc001bkm.2/57134, intron 2 of 11)	1	26126667	26144713	18047	1	57190	uc021ojk.1	-84414	ENSG00000162430	SELENON	selenoprotein N
chr1	26069600	26071052	1453	*	MACS_peak_488	189.13	Intron (uc001bkm.2/57134, intron 2 of 11)	1	26126667	26144713	18047	1	57190	uc021ojk.1	-55615	ENSG00000162430	SELENON	selenoprotein N
chr1	26080551	26082525	1975	*	MACS_peak_489	73.82	Intron (uc001bkm.2/57134, intron 5 of 11)	1	26126667	26144713	18047	1	57190	uc021ojk.1	-44142	ENSG00000162430	SELENON	selenoprotein N
chr1	26133623	26136649	3027	*	MACS_peak_490	54.41	Exon (uc021ojk.1/57190, exon 5 of 13)	1	26126667	26144713	18047	1	57190	uc021ojl.1	6956	ENSG00000162430	SELENON	selenoprotein N
chr1	26214481	26215697	1217	*	MACS_peak_491	91.6	Intron (uc001bky.3/3925, intron 1 of 1)	1	26210677	26219098	8422	2	3925	uc001bky.3	3401	ENSG00000117632	STMN1	stathmin 1
chr1	26226421	26227326	906	*	MACS_peak_492	51.32	3' UTR	1	26226607	26232644	6038	2	3925	uc001bkz.3	5318	ENSG00000117632	STMN1	stathmin 1
chr1	26231803	26233934	2132	*	MACS_peak_493	277.4	Promoter (<=1kb)	1	26232853	26232945	93	2	100500808	uc021ojn.1	0	ENSG00000283938	MIR3917	microRNA 3917
chr1	26344930	26345818	889	*	MACS_peak_496	114.27	Promoter (2-3kb)	1	26348271	26362954	14684	1	2134	uc001blf.3	-2453	ENSG00000158008	EXTL1	exostosin like glycosyltransferase 1
chr1	26354552	26356144	1593	*	MACS_peak_497	66.77	Exon (uc001blf.3/2134, exon 2 of 11)	1	26348271	26362954	14684	1	2134	uc001blf.3	6281	ENSG00000158008	EXTL1	exostosin like glycosyltransferase 1
chr1	26375742	26377006	1265	*	MACS_peak_498	81.09	Downstream (<1kb)	1	26364514	26372604	8091	2	7780	uc001blh.1	-3138	ENSG00000158014	SLC30A2	solute carrier family 30 member 2
chr1	26384937	26385830	894	*	MACS_peak_499	248.94	Exon (uc001bli.2/84676, exon 5 of 9)	1	26377796	26394125	16330	2	84676	uc001bli.2	8295	ENSG00000158022	TRIM63	tripartite motif containing 63
chr1	26560026	26561359	1334	*	MACS_peak_501	54.53	Promoter (<=1kb)	1	26560693	26605298	44606	1	64793	uc001blr.3	0	ENSG00000130695	CEP85	centrosomal protein 85
chr1	26601843	26603298	1456	*	MACS_peak_502	52.34	Promoter (2-3kb)	1	26606213	26608013	1801	1	83442	uc001blu.3	-2915	ENSG00000142669	SH3BGRL3	SH3 domain binding glutamate rich protein like 3
chr1	26736476	26737724	1249	*	MACS_peak_504	50.63	Promoter (<=1kb)	1	26737269	26756210	18942	1	79727	uc001bmi.1	0	ENSG00000131914	LIN28A	lin-28 homolog A
chr1	26758164	26759423	1260	*	MACS_peak_505	397.39	Promoter (<=1kb)	1	26758773	26797795	39023	1	79947	uc001bmk.3	0	ENSG00000117682	DHDDS	dehydrodolichyl diphosphate synthase subunit
chr1	26794024	26794884	861	*	MACS_peak_506	52.04	Exon (uc001bmo.1/uc001bmo.1, exon 1 of 3)	1	26798902	26803133	4232	1	3151	uc001bmp.4	-4018	ENSG00000198830	HMGN2	high mobility group nucleosomal binding domain 2
chr1	26796189	26799949	3761	*	MACS_peak_507	128.78	Promoter (<=1kb)	1	26798902	26803133	4232	1	3151	uc001bmp.4	0	ENSG00000198830	HMGN2	high mobility group nucleosomal binding domain 2
chr1	26860144	26861044	901	*	MACS_peak_509	99.55	Promoter (2-3kb)	1	26857819	26901520	43702	1	6195	uc010ofe.1	2325	ENSG00000117676	RPS6KA1	ribosomal protein S6 kinase A1
chr1	26886434	26888452	2019	*	MACS_peak_510	77.09	Exon (uc001bmr.1/6195, exon 15 of 22)	1	26881033	26881084	52	1	100302190	uc021ojp.1	5401	ENSG00000238705	MIR1976	microRNA 1976
chr1	27049475	27050483	1009	*	MACS_peak_511	318.25	Intron (uc001bmt.1/8289, intron 1 of 18)	1	27055871	27101711	45841	1	8289	uc001bmw.1	-5388	ENSG00000117713	ARID1A	AT-rich interaction domain 1A
chr1	27174826	27178762	3937	*	MACS_peak_512	58	3' UTR	1	27189633	27190947	1315	1	2810	uc001bnc.1	-10871	ENSG00000175793	SFN	stratifin
chr1	27178845	27180814	1970	*	MACS_peak_513	79.41	3' UTR	1	27189633	27190947	1315	1	2810	uc001bnc.1	-8819	ENSG00000175793	SFN	stratifin
chr1	27226300	27227264	965	*	MACS_peak_514	185.58	Promoter (<=1kb)	1	27216979	27226956	9978	2	63906	uc009vsp.2	0	ENSG00000198746	GPATCH3	G-patch domain containing 3
chr1	27299761	27301009	1249	*	MACS_peak_515	64.32	Intron (uc021ojq.1/uc021ojq.1, intron 1 of 1)	1	27276047	27286901	10855	2	126695	uc001bni.2	-12860	ENSG00000175707	KDF1	keratinocyte differentiation factor 1
chr1	27327796	27329104	1309	*	MACS_peak_516	66.09	Intron (uc021ojq.1/uc021ojq.1, intron 1 of 1)	1	27320195	27327377	7183	1	388610	uc001bnj.4	7601	ENSG00000253368	TRNP1	TMF1-regulated nuclear protein 1
chr1	27341520	27342270	751	*	MACS_peak_517	296.89	Promoter (2-3kb)	1	27331511	27339333	7823	2	115572	uc010ofj.2	-2187	ENSG00000158246	FAM46B	family with sequence similarity 46 member B
chr1	27456115	27457838	1724	*	MACS_peak_518	160.86	Intron (uc001bnm.4/6548, intron 1 of 11)	1	27425300	27481621	56322	2	6548	uc001bnm.4	23783	ENSG00000090020	SLC9A1	solute carrier family 9 member A1
chr1	27463157	27465444	2288	*	MACS_peak_519	61.93	Intron (uc001bnm.4/6548, intron 1 of 11)	1	27425300	27481621	56322	2	6548	uc001bnm.4	16177	ENSG00000090020	SLC9A1	solute carrier family 9 member A1
chr1	27648309	27649797	1489	*	MACS_peak_523	125.96	Promoter (<=1kb)	1	27648636	27662891	14256	1	84065	uc001bnr.4	0	ENSG00000186501	TMEM222	transmembrane protein 222
chr1	27728588	27730107	1520	*	MACS_peak_525	53.6	Downstream (<1kb)	1	27719148	27722317	3170	1	2827	uc001bod.4	9440	ENSG00000181773	GPR3	G protein-coupled receptor 3
chr1	27815985	27817677	1693	*	MACS_peak_526	56.22	Promoter (<=1kb)	1	27730734	27816678	85945	2	10163	uc001bof.2	0	ENSG00000158195	WASF2	WAS protein family member 2
chr1	27998604	27999685	1082	*	MACS_peak_529	127.15	Promoter (<=1kb)	1	27992572	27998724	6153	2	2537	uc001bon.1	0	ENSG00000126709	IFI6	interferon alpha inducible protein 6
chr1	28050627	28053395	2769	*	MACS_peak_530	176.65	Promoter (<=1kb)	1	28052490	28086275	33786	1	199870	uc009vtb.3	0	ENSG00000009780	FAM76A	family with sequence similarity 76 member A
chr1	28195101	28196189	1089	*	MACS_peak_531	699.28	Promoter (2-3kb)	1	28199055	28213193	14139	1	9473	uc001boz.3	-2866	ENSG00000130775	THEMIS2	thymocyte selection associated family member 2
chr1	28405372	28406315	944	*	MACS_peak_532	53.13	Intron (uc001bpi.2/2140, intron 1 of 17)	1	28296855	28415148	118294	2	2140	uc001bpi.2	8833	ENSG00000158161	EYA3	EYA transcriptional coactivator and phosphatase 3
chr1	28485597	28486417	821	*	MACS_peak_534	335.37	Intron (uc001bpl.3/5724, intron 1 of 1)	1	28473677	28503455	29779	2	5724	uc001bpl.3	17038	ENSG00000169403	PTAFR	platelet activating factor receptor
chr1	28558586	28560032	1447	*	MACS_peak_535	528.43	Promoter (<=1kb)	1	28526790	28559542	32753	2	22826	uc001bpn.3	0	ENSG00000126698	DNAJC8	DnaJ heat shock protein family (Hsp40) member C8
chr1	28782488	28783344	857	*	MACS_peak_539	656.82	Intron (uc001bpu.3/65979, intron 2 of 5)	1	28764661	28826881	62221	1	65979	uc001bpy.3	17827	ENSG00000204138	PHACTR4	phosphatase and actin regulator 4
chr1	28878693	28879852	1160	*	MACS_peak_540	58.53	Promoter (<=1kb)	1	28879529	28905057	25529	1	54952	uc001bqh.4	0	ENSG00000180098	TRNAU1AP	tRNA selenocysteine 1 associated protein 1
chr1	28916277	28917374	1098	*	MACS_peak_541	329.09	Promoter (1-2kb)	1	28918712	28921088	2377	1	115273	uc001bqu.3	-1338	ENSG00000188060	RAB42	RAB42, member RAS oncogene family
chr1	28969214	28970708	1495	*	MACS_peak_542	50.76	Promoter (<=1kb)	1	28929609	28969604	39996	2	6883	uc001bqx.3	0	ENSG00000120656	TAF12	TATA-box binding protein associated factor 12
chr1	29210914	29212124	1211	*	MACS_peak_543	238.59	Promoter (1-2kb)	1	29213603	29446558	232956	1	2035	uc001brg.2	-1479	ENSG00000159023	EPB41	erythrocyte membrane protein band 4.1
chr1	29240180	29242473	2294	*	MACS_peak_544	85.4	Promoter (<=1kb)	1	29241088	29380164	139077	1	2035	uc009vtk.2	0	ENSG00000159023	EPB41	erythrocyte membrane protein band 4.1
chr1	29475451	29476732	1282	*	MACS_peak_545	78.48	3' UTR	1	29445937	29450421	4485	2	399474	uc001brn.2	-25030	ENSG00000253304	TMEM200B	transmembrane protein 200B
chr1	31179380	31181193	1814	*	MACS_peak_581	127.61	Downstream (2-3kb)	1	31191619	31199593	7975	1	100129196	uc001bsb.1	-10426	ENSG00000186056	MATN1-AS1	MATN1 antisense RNA 1
chr1	31218335	31219616	1282	*	MACS_peak_582	51.4	Intron (uc001bsc.2/7805, intron 1 of 7)	1	31212003	31212079	77	2	100616164	uc021okj.1	-6256	ENSG00000264773	MIR4420	microRNA 4420
chr1	31344427	31345703	1277	*	MACS_peak_584	160.42	3' UTR	1	31342313	31351587	9275	2	9672	uc001bsd.2	5884	ENSG00000162512	SDC3	syndecan 3
chr1	31424771	31425467	697	*	MACS_peak_585	87.67	Promoter (2-3kb)	1	31421965	31422052	88	2	692234	uc021okl.1	-2719	NA	SNORD103A	small nucleolar RNA, C/D box 103A
chr1	31449754	31450753	1000	*	MACS_peak_586	86.29	Intron (uc001bsf.1/9698, intron 3 of 15)	1	31441010	31441084	75	2	692200	uc001bsl.1	-8670	NA	SNORD103C	small nucleolar RNA, C/D box 103C
chr1	31538150	31539295	1146	*	MACS_peak_587	84.86	Promoter (<=1kb)	1	31404353	31538564	134212	2	9698	uc001bsh.1	0	ENSG00000134644	PUM1	pumilio RNA binding family member 1
chr1	31676535	31677436	902	*	MACS_peak_588	150.24	Intron (uc010ogd.2/79570, intron 1 of 6)	1	31652592	31661034	8443	2	79570	uc010ogc.2	-15501	ENSG00000084628	NKAIN1	sodium/potassium transporting ATPase interacting 1
chr1	31827161	31827684	524	*	MACS_peak_589	72.49	Intron (uc001bsp.1/51538, intron 7 of 7)	1	31838100	31845923	7824	2	2170	uc001bss.1	18239	ENSG00000121769	FABP3	fatty acid binding protein 3
chr1	31840388	31841400	1013	*	MACS_peak_590	315.08	Intron (uc001bss.1/2170, intron 2 of 3)	1	31838100	31845923	7824	2	2170	uc001bss.1	4523	ENSG00000121769	FABP3	fatty acid binding protein 3
chr1	32048477	32051600	3124	*	MACS_peak_591	81.72	3' UTR	1	32043746	32053287	9542	1	64129	uc021oko.1	4731	ENSG00000142910	TINAGL1	tubulointerstitial nephritis antigen like 1
chr1	32113528	32114458	931	*	MACS_peak_593	131.09	Promoter (2-3kb)	1	32099887	32110838	10952	2	553115	uc010ogm.2	-2690	ENSG00000162517	PEF1	penta-EF-hand domain containing 1
chr1	32164703	32167858	3156	*	MACS_peak_594	155.69	Promoter (<=1kb)	1	32117848	32164207	46360	2	1307	uc001btj.1	-496	ENSG00000084636	COL16A1	collagen type XVI alpha 1 chain
chr1	32261302	32262591	1290	*	MACS_peak_597	81.59	Promoter (1-2kb)	1	32260097	32264232	4136	2	90853	uc001btw.1	1641	ENSG00000134668	SPOCD1	SPOC domain containing 1
chr1	32281119	32281972	854	*	MACS_peak_598	461.37	Promoter (<=1kb)	1	32256025	32281580	25556	2	90853	uc001bts.1	0	ENSG00000134668	SPOCD1	SPOC domain containing 1
chr1	32389077	32390135	1059	*	MACS_peak_599	82.77	Intron (uc001bty.2/8073, intron 1 of 5)	1	32372022	32385259	13238	2	8073	uc010ogs.2	-3818	ENSG00000184007	PTP4A2	protein tyrosine phosphatase type IVA, member 2
chr1	32403740	32404608	869	*	MACS_peak_600	102.86	Promoter (<=1kb)	1	32372022	32403988	31967	2	8073	uc001bty.2	0	ENSG00000184007	PTP4A2	protein tyrosine phosphatase type IVA, member 2
chr1	32478721	32480876	2156	*	MACS_peak_601	247.06	Promoter (<=1kb)	1	32479295	32509482	30188	1	10657	uc001bua.2	0	ENSG00000121774	KHDRBS1	KH RNA binding domain containing, signal transduction associated 1
chr1	32644741	32646042	1302	*	MACS_peak_602	102.02	Promoter (<=1kb)	1	32645345	32663886	18542	1	200081	uc001bui.3	0	ENSG00000084652	TXLNA	taxilin alpha
chr1	32712096	32714530	2435	*	MACS_peak_603	544.02	Promoter (<=1kb)	1	32712818	32714461	1644	1	84734	uc001buw.3	0	ENSG00000183615	FAM167B	family with sequence similarity 167 member B
chr1	32839491	32840488	998	*	MACS_peak_605	175.59	Intron (uc001bvg.4/55108, intron 9 of 11)	1	32827862	32829924	2063	1	81629	uc001bvf.3	11629	ENSG00000162526	TSSK3	testis specific serine kinase 3
chr1	32955479	32956815	1337	*	MACS_peak_606	55.31	Intron (uc001bvk.3/653121, intron 4 of 9)	1	32930658	32953459	22802	1	728116	uc001bvl.4	24821	ENSG00000273274	ZBTB8B	zinc finger and BTB domain containing 8B
chr1	32958010	32958675	666	*	MACS_peak_607	87.79	Intron (uc001bvk.3/653121, intron 4 of 9)	1	32930658	32953459	22802	1	728116	uc001bvl.4	27352	ENSG00000273274	ZBTB8B	zinc finger and BTB domain containing 8B
chr1	33116099	33117262	1164	*	MACS_peak_608	547.22	Promoter (<=1kb)	1	33065773	33116185	50413	2	339487	uc001bvo.1	0	ENSG00000176261	ZBTB8OS	zinc finger and BTB domain containing 8 opposite strand
chr1	33132505	33133334	830	*	MACS_peak_609	225.03	Intron (uc001bvr.3/5928, intron 3 of 11)	1	33116959	33151812	34854	1	5928	uc010ohk.2	15546	ENSG00000162521	RBBP4	RB binding protein 4, chromatin remodeling factor
chr1	33214417	33216143	1727	*	MACS_peak_610	137.76	Intron (uc001bvu.1/57648, intron 1 of 6)	1	33219687	33240571	20885	1	57648	uc010ohm.1	-3544	ENSG00000162522	KIAA1522	KIAA1522
chr1	33218841	33220683	1843	*	MACS_peak_611	307.84	Promoter (<=1kb)	1	33219687	33240571	20885	1	57648	uc010ohm.1	0	ENSG00000162522	KIAA1522	KIAA1522
chr1	33231931	33232782	852	*	MACS_peak_612	108.01	Promoter (<=1kb)	1	33231235	33240571	9337	1	57648	uc010ohn.1	696	ENSG00000162522	KIAA1522	KIAA1522
chr1	33413413	33414327	915	*	MACS_peak_613	312.21	Exon (uc001bwm.4/127544, exon 3 of 9)	1	33402050	33430286	28237	2	127544	uc001bwm.4	15959	ENSG00000116514	RNF19B	ring finger protein 19B
chr1	33429196	33430069	874	*	MACS_peak_614	57.75	Promoter (<=1kb)	1	33402050	33430286	28237	2	127544	uc001bwm.4	217	ENSG00000116514	RNF19B	ring finger protein 19B
chr1	33470161	33472376	2216	*	MACS_peak_615	360.18	Intron (uc001bwn.3/uc001bwn.3, intron 1 of 1)	1	33473541	33502512	28972	2	204	uc001bwo.2	30136	ENSG00000004455	AK2	adenylate kinase 2
chr1	33564553	33565799	1247	*	MACS_peak_618	99.55	Intron (uc001bwr.3/113451, intron 10 of 11)	1	33547779	33585995	38217	1	113451	uc009vug.3	16774	ENSG00000142920	AZIN2	antizyme inhibitor 2
chr1	33641609	33643066	1458	*	MACS_peak_619	70.83	Intron (uc001bxb.3/55223, intron 1 of 4)	1	33611003	33647671	36669	2	55223	uc001bxb.3	4605	ENSG00000116525	TRIM62	tripartite motif containing 62
chr1	33748175	33749043	869	*	MACS_peak_621	58.68	Intron (uc001bxc.1/149076, intron 6 of 8)	1	33722174	33766320	44147	1	149076	uc001bxc.1	26001	ENSG00000160094	ZNF362	zinc finger protein 362
chr1	33781078	33782820	1743	*	MACS_peak_623	176.33	Intron (uc031plq.1/127550, intron 1 of 4)	1	33772367	33786699	14333	2	127550	uc031plq.1	3879	ENSG00000184389	A3GALT2	alpha 1,3-galactosyltransferase 2
chr1	33792882	33793999	1118	*	MACS_peak_624	95.88	Intron (uc001bxe.1/1912, intron 6 of 6)	1	33797994	33798093	100	2	100500853	uc021okw.1	4094	ENSG00000284154	MIR3605	microRNA 3605
chr1	33797127	33799151	2025	*	MACS_peak_625	76.32	Promoter (<=1kb)	1	33797994	33798093	100	2	100500853	uc021okw.1	0	ENSG00000284154	MIR3605	microRNA 3605
chr1	33815444	33816427	984	*	MACS_peak_626	166.02	Promoter (<=1kb)	1	33789224	33815499	26276	2	1912	uc001bxe.1	0	ENSG00000134686	PHC2	polyhomeotic homolog 2
chr1	33826322	33827803	1482	*	MACS_peak_627	201.99	Intron (uc001bxg.1/1912, intron 6 of 13)	1	33789224	33815499	26276	2	1912	uc001bxf.1	-10823	ENSG00000134686	PHC2	polyhomeotic homolog 2
chr1	33830979	33832017	1039	*	MACS_peak_628	244.38	Intron (uc001bxg.1/1912, intron 6 of 13)	1	33789224	33841194	51971	2	1912	uc001bxg.1	9177	ENSG00000134686	PHC2	polyhomeotic homolog 2
chr1	33984621	33986516	1896	*	MACS_peak_630	79.84	3' UTR	1	33938252	33961995	23744	1	7579	uc009vui.3	46369	ENSG00000121903	ZSCAN20	zinc finger and SCAN domain containing 20
chr1	34000236	34002002	1767	*	MACS_peak_631	292.06	Intron (uc001bxm.1/114784, intron 62 of 70)	1	33938252	33961995	23744	1	7579	uc009vui.3	61984	ENSG00000121903	ZSCAN20	zinc finger and SCAN domain containing 20
chr1	34065930	34066867	938	*	MACS_peak_632	139.72	Exon (uc001bxm.1/114784, exon 44 of 71)	1	34057407	34175104	117698	2	114784	uc001bxo.1	108237	ENSG00000121904	CSMD2	CUB and Sushi multiple domains 2
chr1	34179625	34180700	1076	*	MACS_peak_633	272.17	Exon (uc001bxm.1/114784, exon 21 of 71)	1	34057407	34175104	117698	2	114784	uc001bxo.1	-4521	ENSG00000121904	CSMD2	CUB and Sushi multiple domains 2
chr1	34191606	34193628	2023	*	MACS_peak_634	448.1	Exon (uc001bxm.1/114784, exon 16 of 71)	1	34057407	34175104	117698	2	114784	uc001bxo.1	-16502	ENSG00000121904	CSMD2	CUB and Sushi multiple domains 2
chr1	34260171	34261979	1809	*	MACS_peak_635	80.31	Intron (uc001bxm.1/114784, intron 10 of 70)	1	34326076	34330392	4317	1	127540	uc001bxp.3	-64097	ENSG00000176256	HMGB4	high mobility group box 4
chr1	34335417	34336248	832	*	MACS_peak_636	62.31	Promoter (<=1kb)	1	34334557	34351059	16503	1	402779	uc001bxr.3	860	ENSG00000231163	CSMD2-AS1	CSMD2 antisense RNA 1
chr1	34344776	34345528	753	*	MACS_peak_637	253.56	Intron (uc001bxr.3/402779, intron 5 of 7)	1	34334557	34351059	16503	1	402779	uc001bxr.3	10219	ENSG00000231163	CSMD2-AS1	CSMD2 antisense RNA 1
chr1	34375682	34376634	953	*	MACS_peak_638	52.71	Intron (uc001bxm.1/114784, intron 5 of 70)	1	34334557	34351059	16503	1	402779	uc001bxr.3	41125	ENSG00000231163	CSMD2-AS1	CSMD2 antisense RNA 1
chr1	34485344	34487394	2051	*	MACS_peak_639	54.3	Intron (uc001bxm.1/114784, intron 3 of 70)	1	33979609	34630875	651267	2	114784	uc001bxm.1	143481	ENSG00000121904	CSMD2	CUB and Sushi multiple domains 2
chr1	34536358	34537240	883	*	MACS_peak_640	229.13	Intron (uc001bxm.1/114784, intron 2 of 70)	1	33979609	34630875	651267	2	114784	uc001bxm.1	93635	ENSG00000121904	CSMD2	CUB and Sushi multiple domains 2
chr1	34673549	34674863	1315	*	MACS_peak_641	61.41	Exon (uc001bxs.4/84970, exon 5 of 7)	1	34642553	34684731	42179	1	84970	uc001bxt.3	30996	ENSG00000142698	C1orf94	chromosome 1 open reading frame 94
chr1	35225799	35228393	2595	*	MACS_peak_647	109.3	Promoter (<=1kb)	1	35225342	35229325	3984	1	127534	uc001bxv.1	457	ENSG00000189433	GJB4	gap junction protein beta 4
chr1	35373008	35373887	880	*	MACS_peak_648	79.3	Promoter (2-3kb)	1	35331037	35370984	39948	2	58512	uc001byc.3	-2024	ENSG00000116544	DLGAP3	DLG associated protein 3
chr1	35496979	35497744	766	*	MACS_peak_649	455.87	Promoter (<=1kb)	1	35449368	35497291	47924	2	9204	uc001byf.1	0	ENSG00000163867	ZMYM6	zinc finger MYM-type containing 6
chr1	36068818	36070140	1323	*	MACS_peak_651	110.58	3' UTR	1	36065143	36097138	31996	2	5690	uc021olh.1	26998	ENSG00000126067	PSMB2	proteasome subunit beta 2
chr1	36070400	36071784	1385	*	MACS_peak_652	126.11	Exon (uc001bzd.2/5690, exon 5 of 7)	1	36065143	36097138	31996	2	5690	uc021olh.1	25354	ENSG00000126067	PSMB2	proteasome subunit beta 2
chr1	36395932	36397408	1477	*	MACS_peak_655	67.48	Promoter (<=1kb)	1	36396319	36449010	52692	1	192669	uc001bzn.1	0	ENSG00000126070	AGO3	argonaute 3, RISC catalytic component
chr1	36551314	36553835	2522	*	MACS_peak_656	62.11	Promoter (<=1kb)	1	36554453	36559533	5081	1	54936	uc001bzt.3	-618	ENSG00000116863	ADPRHL2	ADP-ribosylhydrolase like 2
chr1	36598800	36600288	1489	*	MACS_peak_658	337.85	Downstream (1-2kb)	1	36602170	36615115	12946	2	27095	uc001bzx.4	14827	ENSG00000054116	TRAPPC3	trafficking protein particle complex 3
chr1	36621644	36624397	2754	*	MACS_peak_659	79.47	Promoter (<=1kb)	1	36602170	36621654	19485	2	27095	uc031plx.1	0	ENSG00000054116	TRAPPC3	trafficking protein particle complex 3
chr1	36689409	36690860	1452	*	MACS_peak_660	336.77	Promoter (<=1kb)	1	36690017	36770957	80941	1	9967	uc001cae.4	0	ENSG00000054118	THRAP3	thyroid hormone receptor associated protein 3
chr1	36766588	36767510	923	*	MACS_peak_661	57.37	Exon (uc001cae.4/9967, exon 10 of 12)	1	36771994	36787379	15386	1	79729	uc010oia.1	-4484	ENSG00000214193	SH3D21	SH3 domain containing 21
chr1	36820122	36821969	1848	*	MACS_peak_662	94.83	Exon (uc001cak.1/83931, exon 6 of 12)	1	36805231	36826941	21711	2	83931	uc001can.1	4972	ENSG00000196182	STK40	serine/threonine kinase 40
chr1	36865968	36868069	2102	*	MACS_peak_663	127.5	Promoter (2-3kb)	1	36859031	36863493	4463	2	84967	uc001cao.1	-2475	ENSG00000181817	LSM10	LSM10, U7 small nuclear RNA associated
chr1	36929596	36930621	1026	*	MACS_peak_664	156.67	Promoter (<=1kb)	1	36921362	36930040	8679	2	64960	uc001cas.2	0	ENSG00000116898	MRPS15	mitochondrial ribosomal protein S15
chr1	37354237	37355158	922	*	MACS_peak_671	58.01	Intron (uc001caz.2/2899, intron 2 of 15)	1	37261128	37499844	238717	2	2899	uc001caz.2	144686	ENSG00000163873	GRIK3	glutamate ionotropic receptor kainate type subunit 3
chr1	37393146	37394173	1028	*	MACS_peak_672	338.34	Intron (uc001caz.2/2899, intron 1 of 15)	1	37261128	37499844	238717	2	2899	uc001caz.2	105671	ENSG00000163873	GRIK3	glutamate ionotropic receptor kainate type subunit 3
chr1	37422655	37428084	5430	*	MACS_peak_673	126.39	Intron (uc001caz.2/2899, intron 1 of 15)	1	37261128	37499844	238717	2	2899	uc001caz.2	71760	ENSG00000163873	GRIK3	glutamate ionotropic receptor kainate type subunit 3
chr1	37429108	37430822	1715	*	MACS_peak_674	71.26	Intron (uc001caz.2/2899, intron 1 of 15)	1	37261128	37499844	238717	2	2899	uc001caz.2	69022	ENSG00000163873	GRIK3	glutamate ionotropic receptor kainate type subunit 3
chr1	37440809	37441892	1084	*	MACS_peak_675	183.83	Intron (uc001caz.2/2899, intron 1 of 15)	1	37261128	37499844	238717	2	2899	uc001caz.2	57952	ENSG00000163873	GRIK3	glutamate ionotropic receptor kainate type subunit 3
chr1	37454337	37455163	827	*	MACS_peak_676	83.85	Intron (uc001caz.2/2899, intron 1 of 15)	1	37261128	37499844	238717	2	2899	uc001caz.2	44681	ENSG00000163873	GRIK3	glutamate ionotropic receptor kainate type subunit 3
chr1	38019455	38020404	950	*	MACS_peak_685	131.01	Promoter (<=1kb)	1	38000050	38019945	19896	2	79753	uc001cbi.4	0	ENSG00000163877	SNIP1	Smad nuclear interacting protein 1
chr1	38155838	38157681	1844	*	MACS_peak_686	71.78	Promoter (<=1kb)	1	38147242	38156175	8934	2	54955	uc001cbo.3	0	ENSG00000116922	C1orf109	chromosome 1 open reading frame 109
chr1	38411759	38413207	1449	*	MACS_peak_687	57.96	Promoter (<=1kb)	1	38326369	38412729	86361	2	3633	uc001ccg.1	0	ENSG00000204084	INPP5B	inositol polyphosphate-5-phosphatase B
chr1	38451758	38452342	585	*	MACS_peak_688	161.19	Intron (uc001cci.3/10946, intron 4 of 16)	1	38422652	38455761	33110	2	10946	uc001cci.3	3419	ENSG00000183431	SF3A3	splicing factor 3a subunit 3
chr1	38477656	38478740	1085	*	MACS_peak_689	421.22	Promoter (<=1kb)	1	38478384	38490497	12114	1	51118	uc001ccn.4	0	ENSG00000183520	UTP11	UTP11, small subunit processome component
chr1	38510333	38512408	2076	*	MACS_peak_691	86.26	Promoter (<=1kb)	1	38509523	38512450	2928	2	5453	uc001ccp.1	42	ENSG00000185668	POU3F1	POU class 3 homeobox 1
chr1	38552484	38556194	3711	*	MACS_peak_692	51.2	Promoter (<=1kb)	1	38554903	38555001	99	1	100500801	uc021olo.1	0	ENSG00000265596	MIR3659	microRNA 3659
chr1	39324268	39326403	2136	*	MACS_peak_709	240.1	Promoter (<=1kb)	1	39303869	39325495	21627	2	64121	uc001ccq.3	0	ENSG00000116954	RRAGC	Ras related GTP binding C
chr1	39633387	39634034	648	*	MACS_peak_710	80.32	Intron (uc001cdc.2/23499, intron 1 of 61)	1	39670423	39748740	78318	1	23499	uc010oit.1	-36389	ENSG00000127603	MACF1	microtubule-actin crosslinking factor 1
chr1	39649375	39650377	1003	*	MACS_peak_711	56.58	Intron (uc001cdc.2/23499, intron 1 of 61)	1	39670423	39748740	78318	1	23499	uc010oit.1	-20046	ENSG00000127603	MACF1	microtubule-actin crosslinking factor 1
chr1	39696266	39697110	845	*	MACS_peak_712	133.78	5' UTR	1	39670423	39748740	78318	1	23499	uc010oit.1	25843	ENSG00000127603	MACF1	microtubule-actin crosslinking factor 1
chr1	39863890	39864996	1107	*	MACS_peak_713	86.79	Intron (uc001cdc.2/23499, intron 51 of 61)	1	39875176	39882154	6979	1	643314	uc009vvt.1	-10180	ENSG00000127603	KIAA0754	KIAA0754
chr1	40005549	40006875	1327	*	MACS_peak_714	596.52	Intron (uc001cdk.3/728448, intron 7 of 8)	1	39987952	39991357	3406	2	728448	uc001cdj.2	-14192	NA	PPIEL	peptidylprolyl isomerase E like pseudogene
chr1	40425351	40426970	1620	*	MACS_peak_718	89.45	Intron (uc010ojb.1/84879, intron 3 of 12)	1	40420784	40435628	14845	1	84879	uc010ojc.2	4567	ENSG00000168389	MFSD2A	major facilitator superfamily domain containing 2A
chr1	40562347	40563399	1053	*	MACS_peak_720	223.14	Promoter (<=1kb)	1	40538382	40563142	24761	2	5538	uc001cfb.2	0	ENSG00000131238	PPT1	palmitoyl-protein thioesterase 1
chr1	40626500	40627618	1119	*	MACS_peak_721	381.22	Promoter (<=1kb)	1	40627041	40706593	79553	1	6018	uc001cfc.4	0	ENSG00000117000	RLF	rearranged L-myc fusion
chr1	41156957	41158477	1521	*	MACS_peak_724	59.55	Promoter (<=1kb)	1	41154752	41157933	3182	2	100130557	uc010ojl.1	0	NA	NFYC-AS1	NFYC antisense RNA 1
chr1	41201706	41202549	844	*	MACS_peak_725	110.78	Promoter (1-2kb)	1	41204508	41237276	32769	1	4802	uc001cge.3	-1959	ENSG00000066136	NFYC	nuclear transcription factor Y subunit gamma
chr1	41272274	41273582	1309	*	MACS_peak_726	54.71	Intron (uc001cgh.2/9132, intron 1 of 13)	1	41249684	41306124	56441	1	9132	uc001cgi.2	22590	ENSG00000117013	KCNQ4	potassium voltage-gated channel subfamily Q member 4
chr1	41469138	41470222	1085	*	MACS_peak_729	262.61	Intron (uc001cgk.4/1503, intron 12 of 18)	1	41480262	41509562	29301	1	100507178	uc021omd.1	-10040	ENSG00000281207	SLFNL1-AS1	SLFNL1 antisense RNA 1
chr1	41588512	41589403	892	*	MACS_peak_730	55.89	Intron (uc010ojr.2/22955, intron 2 of 8)	1	41492871	41625605	132735	2	22955	uc010ojr.2	36202	ENSG00000010803	SCMH1	Scm polycomb group protein homolog 1
chr1	41706624	41707862	1239	*	MACS_peak_731	98.94	Promoter (<=1kb)	1	41492871	41707815	214945	2	22955	uc001cgq.3	0	ENSG00000010803	SCMH1	Scm polycomb group protein homolog 1
chr1	41968980	41971390	2411	*	MACS_peak_736	339.26	Downstream (<1kb)	1	41944446	41950344	5899	2	1907	uc001cgx.3	-18636	ENSG00000127129	EDN2	endothelin 2
chr1	41979713	41982867	3155	*	MACS_peak_737	59.66	Intron (uc001cgy.3/59269, intron 3 of 4)	1	41944446	41950344	5899	2	1907	uc001cgx.3	-29369	ENSG00000127129	EDN2	endothelin 2
chr1	42048274	42050095	1822	*	MACS_peak_738	87.41	Promoter (<=1kb)	1	41972036	42050989	78954	2	59269	uc001cgy.3	894	ENSG00000127124	HIVEP3	human immunodeficiency virus type I enhancer binding protein 3
chr1	42146717	42148166	1450	*	MACS_peak_739	96.13	Intron (uc001cgz.4/59269, intron 2 of 8)	1	41972036	42050989	78954	2	59269	uc001cgy.3	-95728	ENSG00000127124	HIVEP3	human immunodeficiency virus type I enhancer binding protein 3
chr1	42155078	42156438	1361	*	MACS_peak_740	53.21	Intron (uc001cgz.4/59269, intron 2 of 8)	1	41972036	42050989	78954	2	59269	uc001cgy.3	-104089	ENSG00000127124	HIVEP3	human immunodeficiency virus type I enhancer binding protein 3
chr1	42201943	42205912	3970	*	MACS_peak_741	123.27	Intron (uc001cgz.4/59269, intron 1 of 8)	1	41972036	42050989	78954	2	59269	uc001cgy.3	-150954	ENSG00000127124	HIVEP3	human immunodeficiency virus type I enhancer binding protein 3
chr1	42239233	42240120	888	*	MACS_peak_742	141.06	Intron (uc001cgz.4/59269, intron 1 of 8)	1	41972036	42384496	412461	2	59269	uc001cgz.4	144376	ENSG00000127124	HIVEP3	human immunodeficiency virus type I enhancer binding protein 3
chr1	42260652	42261535	884	*	MACS_peak_743	594.02	Intron (uc001cgz.4/59269, intron 1 of 8)	1	41972036	42384496	412461	2	59269	uc001cgz.4	122961	ENSG00000127124	HIVEP3	human immunodeficiency virus type I enhancer binding protein 3
chr1	42279237	42280322	1086	*	MACS_peak_744	50.52	Intron (uc001cgz.4/59269, intron 1 of 8)	1	41972036	42384496	412461	2	59269	uc001cgz.4	104174	ENSG00000127124	HIVEP3	human immunodeficiency virus type I enhancer binding protein 3
chr1	42873536	42874399	864	*	MACS_peak_746	54.35	Intron (uc001chi.2/284716, intron 3 of 4)	1	42846468	42889900	43433	1	284716	uc001chi.2	27068	ENSG00000177181	RIMKLA	ribosomal modification protein rimK like family member A
chr1	42914872	42915638	767	*	MACS_peak_747	72.11	Exon (uc001chj.3/84217, exon 2 of 8)	1	42896001	42921938	25938	2	84217	uc001chj.3	6300	ENSG00000066185	ZMYND12	zinc finger MYND-type containing 12
chr1	42921237	42922978	1742	*	MACS_peak_748	281.21	Promoter (<=1kb)	1	42922173	42926086	3914	1	79717	uc001chk.3	0	ENSG00000127125	PPCS	phosphopantothenoylcysteine synthetase
chr1	43146853	43148285	1433	*	MACS_peak_749	151	Promoter (<=1kb)	1	43148066	43168020	19955	1	4904	uc001chs.3	0	ENSG00000065978	YBX1	Y-box binding protein 1
chr1	43148443	43149425	983	*	MACS_peak_750	133.83	Promoter (<=1kb)	1	43148066	43168020	19955	1	4904	uc001chs.3	377	ENSG00000065978	YBX1	Y-box binding protein 1
chr1	43279248	43279963	716	*	MACS_peak_751	92.05	Promoter (2-3kb)	1	43282776	43305384	22609	1	114625	uc010ojw.1	-2813	ENSG00000164010	ERMAP	erythroblast membrane associated protein (Scianna blood group)
chr1	43334722	43335379	658	*	MACS_peak_752	81.36	Intron (uc001cij.1/uc001cij.1, intron 1 of 3)	1	43314962	43318146	3185	1	51058	uc001cih.3	19760	ENSG00000164011	ZNF691	zinc finger protein 691
chr1	43392683	43394096	1414	*	MACS_peak_753	182.06	3' UTR	1	43424720	43449029	24310	1	440584	uc001cil.3	-30624	ENSG00000227533	SLC2A1-AS1	SLC2A1 antisense RNA 1
chr1	43401534	43403965	2432	*	MACS_peak_754	59.5	Intron (uc001cik.2/6513, intron 2 of 9)	1	43424720	43449029	24310	1	440584	uc001cil.3	-20755	ENSG00000227533	SLC2A1-AS1	SLC2A1 antisense RNA 1
chr1	43417365	43419940	2576	*	MACS_peak_755	402.26	Intron (uc001cik.2/6513, intron 1 of 9)	1	43424720	43449029	24310	1	440584	uc001cil.3	-4780	ENSG00000227533	SLC2A1-AS1	SLC2A1 antisense RNA 1
chr1	43423129	43424999	1871	*	MACS_peak_756	70.49	Promoter (<=1kb)	1	43424720	43449029	24310	1	440584	uc001cil.3	0	ENSG00000227533	SLC2A1-AS1	SLC2A1 antisense RNA 1
chr1	43602667	43603864	1198	*	MACS_peak_761	89.5	Intron (uc009vwn.1/uc009vwn.1, intron 1 of 2)	1	43613594	43622067	8474	1	440585	uc009vwo.3	-9730	ENSG00000186973	FAM183A	family with sequence similarity 183 member A
chr1	43604802	43605563	762	*	MACS_peak_762	68.79	Intron (uc009vwn.1/uc009vwn.1, intron 1 of 2)	1	43613594	43622067	8474	1	440585	uc009vwo.3	-8031	ENSG00000186973	FAM183A	family with sequence similarity 183 member A
chr1	43606179	43606898	720	*	MACS_peak_763	284.79	Intron (uc009vwn.1/uc009vwn.1, intron 1 of 2)	1	43613594	43622067	8474	1	440585	uc009vwo.3	-6696	ENSG00000186973	FAM183A	family with sequence similarity 183 member A
chr1	43767659	43768824	1166	*	MACS_peak_764	54.61	Promoter (1-2kb)	1	43766566	43788781	22216	1	7075	uc010oke.2	1093	ENSG00000066056	TIE1	tyrosine kinase with immunoglobulin like and EGF like domains 1
chr1	43832605	43834593	1989	*	MACS_peak_765	75.34	Promoter (<=1kb)	1	43829068	43833409	4342	2	64834	uc031pmf.1	0	ENSG00000066322	ELOVL1	ELOVL fatty acid elongase 1
chr1	43994573	43995543	971	*	MACS_peak_767	112.76	Promoter (1-2kb)	1	43996547	44045736	49190	1	5792	uc001cjq.4	-1004	ENSG00000142949	PTPRF	protein tyrosine phosphatase, receptor type F
chr1	44011665	44015471	3807	*	MACS_peak_768	56.99	Intron (uc001cjq.4/5792, intron 3 of 7)	1	44003869	44045736	41868	1	5792	uc001cjt.4	7796	ENSG00000142949	PTPRF	protein tyrosine phosphatase, receptor type F
chr1	44031366	44032944	1579	*	MACS_peak_769	107.37	Intron (uc001cjq.4/5792, intron 5 of 7)	1	44056643	44089343	32701	1	5792	uc001cju.3	-23699	ENSG00000142949	PTPRF	protein tyrosine phosphatase, receptor type F
chr1	44051334	44059348	8015	*	MACS_peak_770	51.47	Promoter (<=1kb)	1	44056643	44089343	32701	1	5792	uc001cju.3	0	ENSG00000142949	PTPRF	protein tyrosine phosphatase, receptor type F
chr1	44157229	44159006	1778	*	MACS_peak_771	460.04	Exon (uc001cjx.3/9682, exon 15 of 22)	1	44171495	44360149	188655	1	6487	uc009vwu.1	-12489	ENSG00000126091	ST3GAL3	ST3 beta-galactoside alpha-2,3-sialyltransferase 3
chr1	44299869	44301746	1878	*	MACS_peak_772	64.76	Intron (uc009vwu.1/6487, intron 5 of 7)	1	44398992	44402912	3921	1	9048	uc001cks.3	-97246	ENSG00000117407	ARTN	artemin
chr1	44411363	44414720	3358	*	MACS_peak_773	77.89	Promoter (<=1kb)	1	44412478	44433694	21217	1	9670	uc001ckx.3	0	ENSG00000117408	IPO13	importin 13
chr1	44439311	44441760	2450	*	MACS_peak_774	678.34	Promoter (<=1kb)	1	44440602	44443972	3371	1	533	uc001cld.3	0	ENSG00000117410	ATP6V0B	ATPase H+ transporting V0 subunit b
chr1	44541606	44542290	685	*	MACS_peak_775	76.65	Intron (uc009vxf.1/128209, intron 2 of 2)	1	44514030	44595868	81839	1	128209	uc009vxf.1	27576	ENSG00000171872	KLF17	Kruppel like factor 17
chr1	44793116	44794355	1240	*	MACS_peak_776	91.57	Intron (uc010okv.2/79033, intron 1 of 6)	1	44686742	44818597	131856	2	79033	uc010okv.2	24242	ENSG00000117419	ERI3	ERI1 exoribonuclease family member 3
chr1	44912867	44913782	916	*	MACS_peak_777	55.45	Intron (uc001clv.1/55182, intron 2 of 14)	1	44889496	45117396	227901	1	55182	uc010oky.1	23371	ENSG00000187147	RNF220	ring finger protein 220
chr1	44937454	44939016	1563	*	MACS_peak_778	311.66	Intron (uc001clv.1/55182, intron 2 of 14)	1	44889496	45117396	227901	1	55182	uc010oky.1	47958	ENSG00000187147	RNF220	ring finger protein 220
chr1	44962849	44963650	802	*	MACS_peak_779	67.26	Intron (uc001clv.1/55182, intron 2 of 14)	1	45011165	45011224	60	1	100847089	uc031pmh.1	-47515	ENSG00000263381	MIR5584	microRNA 5584
chr1	44997530	44998877	1348	*	MACS_peak_780	58.48	Intron (uc001clv.1/55182, intron 2 of 14)	1	45011165	45011224	60	1	100847089	uc031pmh.1	-12288	ENSG00000263381	MIR5584	microRNA 5584
chr1	45016124	45017045	922	*	MACS_peak_781	246.07	Intron (uc001clv.1/55182, intron 2 of 14)	1	45011165	45011224	60	1	100847089	uc031pmh.1	4959	ENSG00000263381	MIR5584	microRNA 5584
chr1	45063866	45064789	924	*	MACS_peak_782	52.79	Intron (uc001clv.1/55182, intron 2 of 14)	1	45097704	45117395	19692	1	55182	uc010okz.2	-32915	ENSG00000187147	RNF220	ring finger protein 220
chr1	45097005	45098281	1277	*	MACS_peak_783	648.5	Promoter (<=1kb)	1	45097704	45117395	19692	1	55182	uc010okz.2	0	ENSG00000187147	RNF220	ring finger protein 220
chr1	45125620	45126527	908	*	MACS_peak_784	211.81	Promoter (<=1kb)	1	45119909	45125967	6059	2	79639	uc010ola.1	0	ENSG00000126106	TMEM53	transmembrane protein 53
chr1	45137775	45140682	2908	*	MACS_peak_785	77.79	Promoter (<=1kb)	1	45140394	45191263	50870	1	339541	uc001cmf.2	0	ENSG00000198520	C1orf228	chromosome 1 open reading frame 228
chr1	45240046	45241611	1566	*	MACS_peak_786	55.83	Promoter (<=1kb)	1	45241537	45241610	74	1	26811	uc001cmj.1	0	ENSG00000264294	SNORD55	small nucleolar RNA, C/D box 55
chr1	45272456	45274626	2171	*	MACS_peak_787	266.49	Promoter (<=1kb)	1	45274154	45279171	5018	1	149478	uc010old.1	0	ENSG00000222009	BTBD19	BTB domain containing 19
chr1	45291621	45295973	4353	*	MACS_peak_788	62.47	5' UTR	1	45285516	45308616	23101	2	8643	uc021omv.1	12643	ENSG00000117425	PTCH2	patched 2
chr1	45466366	45467201	836	*	MACS_peak_789	59.46	Downstream (1-2kb)	1	45468220	45471260	3041	2	79654	uc001cmx.4	4059	ENSG00000126107	HECTD3	HECT domain E3 ubiquitin protein ligase 3
chr1	45473687	45478929	5243	*	MACS_peak_790	163.07	Promoter (<=1kb)	1	45477805	45479663	1859	1	7389	uc010oli.2	0	ENSG00000126088	UROD	uroporphyrinogen decarboxylase
chr1	45504517	45505317	801	*	MACS_peak_791	76.76	Exon (uc001cnd.2/57643, exon 8 of 14)	1	45478481	45480508	2028	1	7389	uc010olj.1	26036	ENSG00000126088	UROD	uroporphyrinogen decarboxylase
chr1	45593102	45593692	591	*	MACS_peak_792	68.34	Intron (uc001cnd.2/57643, intron 1 of 13)	1	45482076	45672250	190175	2	57643	uc001cnd.2	78558	ENSG00000162415	ZSWIM5	zinc finger SWIM-type containing 5
chr1	45656431	45657432	1002	*	MACS_peak_793	91.95	Intron (uc001cnd.2/57643, intron 1 of 13)	1	45482076	45672250	190175	2	57643	uc001cnd.2	14818	ENSG00000162415	ZSWIM5	zinc finger SWIM-type containing 5
chr1	45666413	45667004	592	*	MACS_peak_794	146.58	Intron (uc001cnd.2/57643, intron 1 of 13)	1	45482076	45672250	190175	2	57643	uc001cnd.2	5246	ENSG00000162415	ZSWIM5	zinc finger SWIM-type containing 5
chr1	45791964	45794122	2159	*	MACS_peak_796	129.06	Promoter (<=1kb)	1	45792545	45794346	1802	1	84842	uc001cne.3	0	ENSG00000186603	HPDL	4-hydroxyphenylpyruvate dioxygenase like
chr1	45796791	45800789	3999	*	MACS_peak_797	182.79	5' UTR	1	45792545	45794346	1802	1	84842	uc001cne.3	4246	ENSG00000186603	HPDL	4-hydroxyphenylpyruvate dioxygenase like
chr1	45846608	45847699	1092	*	MACS_peak_798	65.9	Intron (uc009vxr.1/10420, intron 3 of 8)	1	45794914	45806142	11229	2	4595	uc010oll.2	-40466	ENSG00000132781	MUTYH	mutY DNA glycosylase
chr1	45975517	45976426	910	*	MACS_peak_799	68.31	3' UTR	1	45965856	45976739	10884	1	25974	uc009vxv.3	9661	ENSG00000132763	MMACHC	methylmalonic aciduria (cobalamin deficiency) cblC type, with homocystinuria
chr1	46015866	46017127	1262	*	MACS_peak_800	120.09	Promoter (<=1kb)	1	46016455	46035723	19269	1	10327	uc001cod.3	0	ENSG00000117448	AKR1A1	aldo-keto reductase family 1 member A1
chr1	46437623	46438545	923	*	MACS_peak_802	79.91	Intron (uc001cov.3/23139, intron 5 of 28)	1	46471913	46501794	29882	1	23139	uc001cpa.3	-33368	ENSG00000086015	MAST2	microtubule associated serine/threonine kinase 2
chr1	46519187	46520033	847	*	MACS_peak_803	61.74	Intron (uc010olv.2/8503, intron 2 of 4)	1	46505812	46527810	21999	2	8503	uc010olv.2	7777	ENSG00000117461	PIK3R3	phosphoinositide-3-kinase regulatory subunit 3
chr1	46621888	46622891	1004	*	MACS_peak_804	75.59	Intron (uc010olw.2/8503, intron 1 of 9)	1	46640749	46651634	10886	1	10103	uc001cpd.3	-17858	ENSG00000117472	TSPAN1	tetraspanin 1
chr1	46687085	46688754	1670	*	MACS_peak_805	145.13	Promoter (1-2kb)	1	46654353	46685977	31625	2	55624	uc001cpg.3	-1108	ENSG00000085998	POMGNT1	protein O-linked mannose N-acetylglucosaminyltransferase 1 (beta 1,2-)
chr1	46805623	46807797	2175	*	MACS_peak_806	57.87	Promoter (<=1kb)	1	46805849	46830824	24976	1	387338	uc001cpr.2	0	ENSG00000117481	NSUN4	NOP2/Sun RNA methyltransferase family member 4
chr1	46812590	46813553	964	*	MACS_peak_807	54.29	Exon (uc001cpr.2/387338, exon 3 of 6)	1	46807508	46830824	23317	1	387338	uc001cpt.2	5082	ENSG00000117481	NSUN4	NOP2/Sun RNA methyltransferase family member 4
chr1	47041809	47042944	1136	*	MACS_peak_808	50.07	Exon (uc001cqb.4/8569, exon 5 of 14)	1	47011316	47016887	5572	2	148930	uc009vyh.1	-24922	ENSG00000162456	KNCN	kinocilin
chr1	47277592	47281245	3654	*	MACS_peak_811	131.04	Promoter (<=1kb)	1	47276745	47279987	3243	1	1580	uc010oml.1	847	ENSG00000142973	CYP4B1	cytochrome P450 family 4 subfamily B member 1
chr1	47281436	47283120	1685	*	MACS_peak_812	103.77	Exon (uc001cqm.4/1580, exon 9 of 12)	1	47276745	47279987	3243	1	1580	uc010oml.1	4691	ENSG00000142973	CYP4B1	cytochrome P450 family 4 subfamily B member 1
chr1	47283953	47285890	1938	*	MACS_peak_813	92.8	3' UTR	1	47276745	47279987	3243	1	1580	uc010oml.1	7208	ENSG00000142973	CYP4B1	cytochrome P450 family 4 subfamily B member 1
chr1	47656173	47657896	1724	*	MACS_peak_814	122.39	Promoter (<=1kb)	1	47649261	47655771	6511	2	10158	uc001cqw.3	-402	ENSG00000162366	PDZK1IP1	PDZK1 interacting protein 1
chr1	48293491	48294896	1406	*	MACS_peak_818	122.97	Intron (uc021ong.1/388630, intron 2 of 6)	1	48226200	48462562	236363	2	388630	uc021ong.1	167666	ENSG00000269113	TRABD2B	TraB domain containing 2B
chr1	48398175	48398863	689	*	MACS_peak_819	187.09	Intron (uc021ong.1/388630, intron 2 of 6)	1	48226200	48462562	236363	2	388630	uc021ong.1	63699	ENSG00000269113	TRABD2B	TraB domain containing 2B
chr1	48456494	48457286	793	*	MACS_peak_820	87.16	Intron (uc021ong.1/388630, intron 2 of 6)	1	48226200	48462562	236363	2	388630	uc021ong.1	5276	ENSG00000269113	TRABD2B	TraB domain containing 2B
chr1	48688612	48690498	1887	*	MACS_peak_824	85.46	Promoter (<=1kb)	1	48688357	48714316	25960	1	200010	uc010omu.1	255	ENSG00000117834	SLC5A9	solute carrier family 5 member 9
chr1	48695680	48696604	925	*	MACS_peak_825	89.23	5' UTR	1	48688357	48714316	25960	1	200010	uc010omu.1	7323	ENSG00000117834	SLC5A9	solute carrier family 5 member 9
chr1	48707457	48708954	1498	*	MACS_peak_826	117.72	Promoter (2-3kb)	1	48704994	48714316	9323	1	200010	uc009vyt.1	2463	ENSG00000117834	SLC5A9	solute carrier family 5 member 9
chr1	49170189	49170877	689	*	MACS_peak_828	60.96	Intron (uc001cru.2/84871, intron 6 of 13)	1	49193540	49242547	49008	2	79656	uc001crw.4	71670	ENSG00000162373	BEND5	BEN domain containing 5
chr1	49635370	49635845	476	*	MACS_peak_829	75.33	Intron (uc001cru.2/84871, intron 4 of 13)	1	49049542	49511472	461931	2	84871	uc010omy.1	-123898	ENSG00000186094	AGBL4	ATP/GTP binding protein like 4
chr1	49772060	49772682	623	*	MACS_peak_830	528.18	Intron (uc001cru.2/84871, intron 3 of 13)	1	49049542	49511472	461931	2	84871	uc010omy.1	-260588	ENSG00000186094	AGBL4	ATP/GTP binding protein like 4
chr1	49872863	49873320	458	*	MACS_peak_831	54.34	Intron (uc001cru.2/84871, intron 3 of 13)	1	49049542	49511472	461931	2	84871	uc010omy.1	-361391	ENSG00000186094	AGBL4	ATP/GTP binding protein like 4
chr1	49905970	49906816	847	*	MACS_peak_832	97.94	Intron (uc001cru.2/84871, intron 3 of 13)	1	49049542	49511472	461931	2	84871	uc010omy.1	-394498	ENSG00000186094	AGBL4	ATP/GTP binding protein like 4
chr1	50252440	50253204	765	*	MACS_peak_833	215.84	Intron (uc001cru.2/84871, intron 2 of 13)	1	48998527	50489626	1491100	2	84871	uc001cru.2	236422	ENSG00000186094	AGBL4	ATP/GTP binding protein like 4
chr1	50523048	50523744	697	*	MACS_peak_835	50.1	Intron (uc001cry.3/1996, intron 1 of 6)	1	50513686	50667540	153855	1	1996	uc001cry.3	9362	ENSG00000162374	ELAVL4	ELAV like RNA binding protein 4
chr1	51410617	51411557	941	*	MACS_peak_839	74.79	Intron (uc009vyw.1/11124, intron 1 of 15)	1	50906935	51425525	518591	2	11124	uc009vyw.1	13968	ENSG00000185104	FAF1	Fas associated factor 1
chr1	51425631	51426621	991	*	MACS_peak_840	253.74	Promoter (<=1kb)	1	50906935	51425936	519002	2	11124	uc001cse.1	0	ENSG00000185104	FAF1	Fas associated factor 1
chr1	51761568	51764150	2583	*	MACS_peak_841	80.05	Promoter (<=1kb)	1	51752930	51763594	10665	2	22996	uc001csj.3	0	ENSG00000085831	TTC39A	tetratricopeptide repeat domain 39A
chr1	52048877	52050391	1515	*	MACS_peak_843	140.66	Intron (uc001css.4/114883, intron 1 of 25)	1	52042851	52254891	212041	1	114883	uc001css.4	6026	ENSG00000117859	OSBPL9	oxysterol binding protein like 9
chr1	52250238	52251394	1157	*	MACS_peak_844	95	Exon (uc001css.4/114883, exon 22 of 26)	1	52225296	52254891	29596	1	114883	uc001ctb.3	24942	ENSG00000117859	OSBPL9	oxysterol binding protein like 9
chr1	52343442	52345059	1618	*	MACS_peak_845	52.32	Promoter (<=1kb)	1	52254866	52343712	88847	2	4898	uc001cte.3	0	ENSG00000078618	NRDC	nardilysin convertase
chr1	52375010	52375747	738	*	MACS_peak_846	62.95	3' UTR	1	52257250	52344609	87360	2	4898	uc001ctf.2	-30401	ENSG00000078618	NRDC	nardilysin convertase
chr1	52497905	52499659	1755	*	MACS_peak_847	125.76	Promoter (<=1kb)	1	52497777	52499472	1696	2	112970	uc001ctj.1	0	ENSG00000198841	KTI12	KTI12 chromatin associated homolog
chr1	52521603	52522827	1225	*	MACS_peak_848	62.09	Promoter (<=1kb)	1	52485804	52521843	36040	2	51060	uc001cti.4	0	ENSG00000117862	TXNDC12	thioredoxin domain containing 12
chr1	52537827	52538756	930	*	MACS_peak_849	50.32	Intron (uc001ctk.3/91408, intron 3 of 5)	1	52521857	52556388	34532	1	91408	uc010onh.2	15970	ENSG00000134717	BTF3L4	basic transcription factor 3 like 4
chr1	52607219	52608678	1460	*	MACS_peak_851	64.01	Promoter (<=1kb)	1	52607766	52729719	121954	1	9372	uc001ctn.4	0	ENSG00000157077	ZFYVE9	zinc finger FYVE-type containing 9
chr1	52625785	52626620	836	*	MACS_peak_852	113.25	Intron (uc001ctn.4/9372, intron 1 of 4)	1	52607766	52812358	204593	1	9372	uc001ctp.4	18019	ENSG00000157077	ZFYVE9	zinc finger FYVE-type containing 9
chr1	52753855	52754550	696	*	MACS_peak_853	58.8	Intron (uc001cto.4/9372, intron 10 of 18)	1	52818204	52824133	5930	2	200014	uc001ctr.3	69583	ENSG00000154222	CC2D1B	coiled-coil and C2 domain containing 1B
chr1	52807321	52808132	812	*	MACS_peak_854	193.23	Intron (uc001cto.4/9372, intron 17 of 18)	1	52818204	52824133	5930	2	200014	uc001ctr.3	16001	ENSG00000154222	CC2D1B	coiled-coil and C2 domain containing 1B
chr1	52830614	52832374	1761	*	MACS_peak_855	345.86	Promoter (<=1kb)	1	52816265	52831877	15613	2	200014	uc001ctq.2	0	ENSG00000154222	CC2D1B	coiled-coil and C2 domain containing 1B
chr1	52864268	52865051	784	*	MACS_peak_856	181.52	Intron (uc001ctt.3/4998, intron 3 of 16)	1	52838501	52870143	31643	2	4998	uc001ctt.3	5092	ENSG00000085840	ORC1	origin recognition complex subunit 1
chr1	53163157	53164510	1354	*	MACS_peak_857	605.37	Promoter (<=1kb)	1	53152014	53164038	12025	2	65260	uc001cui.2	0	ENSG00000162377	COA7	cytochrome c oxidase assembly factor 7 (putative)
chr1	53342241	53342981	741	*	MACS_peak_859	102.77	Intron (uc001cuk.2/440590, intron 8 of 13)	1	53308183	53360247	52065	1	440590	uc001cul.2	34058	ENSG00000203995	ZYG11A	zyg-11 family member A, cell cycle regulator
chr1	53482271	53482762	492	*	MACS_peak_860	137.98	Promoter (1-2kb)	1	53480562	53517289	36728	1	6342	uc001cuu.2	1709	ENSG00000116171	SCP2	sterol carrier protein 2
chr1	53515371	53516418	1048	*	MACS_peak_861	95.29	3' UTR	1	53527724	53551174	23451	1	127435	uc001cuv.3	-11306	ENSG00000174348	PODN	podocan
chr1	53558489	53568350	9862	*	MACS_peak_862	100.7	Promoter (1-2kb)	1	53552855	53556654	3800	2	6512	uc001cux.3	-1835	ENSG00000162383	SLC1A7	solute carrier family 1 member 7
chr1	53575253	53576973	1721	*	MACS_peak_863	95.39	Intron (uc021onm.1/6512, intron 2 of 9)	1	53552855	53556654	3800	2	6512	uc001cux.3	-18599	ENSG00000162383	SLC1A7	solute carrier family 1 member 7
chr1	53585614	53587135	1522	*	MACS_peak_864	56.86	Intron (uc021onm.1/6512, intron 2 of 9)	1	53552851	53608289	55439	2	6512	uc021onm.1	21154	ENSG00000162383	SLC1A7	solute carrier family 1 member 7
chr1	53596453	53598087	1635	*	MACS_peak_865	127.75	Intron (uc021onm.1/6512, intron 2 of 9)	1	53552851	53608289	55439	2	6512	uc021onm.1	10202	ENSG00000162383	SLC1A7	solute carrier family 1 member 7
chr1	53600642	53601746	1105	*	MACS_peak_866	253.48	Intron (uc021onm.1/6512, intron 1 of 9)	1	53552851	53608289	55439	2	6512	uc021onm.1	6543	ENSG00000162383	SLC1A7	solute carrier family 1 member 7
chr1	53701312	53702069	758	*	MACS_peak_868	80.02	Promoter (2-3kb)	1	53704282	53708455	4174	1	100507564	uc001cvg.3	-2213	ENSG00000226754	LOC100507564	uncharacterized LOC100507564
chr1	53745902	53747550	1649	*	MACS_peak_869	59.75	5' UTR	1	53716362	53734270	17909	2	7804	uc001cvm.1	-11632	ENSG00000157193	LRP8	LDL receptor related protein 8
chr1	53772682	53775894	3213	*	MACS_peak_870	56.25	Intron (uc001cvh.2/7804, intron 2 of 15)	1	53708041	53793071	85031	2	7804	uc001cvh.2	17177	ENSG00000157193	LRP8	LDL receptor related protein 8
chr1	53778341	53781298	2958	*	MACS_peak_871	64.69	Intron (uc001cvh.2/7804, intron 2 of 15)	1	53708041	53793071	85031	2	7804	uc001cvh.2	11773	ENSG00000157193	LRP8	LDL receptor related protein 8
chr1	53790949	53793435	2487	*	MACS_peak_872	199.93	Promoter (<=1kb)	1	53708041	53793071	85031	2	7804	uc001cvh.2	0	ENSG00000157193	LRP8	LDL receptor related protein 8
chr1	53976383	53978958	2576	*	MACS_peak_875	127.78	Intron (uc001cvr.1/148979, intron 7 of 9)	1	53925072	53933158	8087	1	63948	uc001cvq.1	51311	ENSG00000143006	DMRTB1	DMRT like family B with proline rich C-terminal 1
chr1	54050733	54052771	2039	*	MACS_peak_876	91.67	Intron (uc001cvr.1/148979, intron 3 of 9)	1	53925072	53933158	8087	1	63948	uc001cvq.1	125661	ENSG00000143006	DMRTB1	DMRT like family B with proline rich C-terminal 1
chr1	54058284	54060118	1835	*	MACS_peak_877	52.64	Exon (uc001cvr.1/148979, exon 3 of 10)	1	53925072	53933158	8087	1	63948	uc001cvq.1	133212	ENSG00000143006	DMRTB1	DMRT like family B with proline rich C-terminal 1
chr1	54408334	54408902	569	*	MACS_peak_879	70.94	Promoter (2-3kb)	1	54387234	54411288	24055	2	51668	uc001cwh.3	2386	ENSG00000081870	HSPB11	heat shock protein family B (small) member 11
chr1	54648881	54649435	555	*	MACS_peak_880	95.29	Intron (uc001cww.3/606495, intron 4 of 6)	1	54638027	54661388	23362	2	606495	uc001cww.3	11953	ENSG00000215883	CYB5RL	cytochrome b5 reductase like
chr1	54664866	54666414	1549	*	MACS_peak_881	137.11	Promoter (<=1kb)	1	54665840	54684056	18217	1	51253	uc001cxa.4	0	ENSG00000116221	MRPL37	mitochondrial ribosomal protein L37
chr1	54738311	54741321	3011	*	MACS_peak_882	145.87	Intron (uc001cxe.4/23648, intron 5 of 17)	1	54665840	54684056	18217	1	51253	uc009vzp.3	72471	ENSG00000116221	MRPL37	mitochondrial ribosomal protein L37
chr1	54744505	54746284	1780	*	MACS_peak_883	104.96	Intron (uc001cxe.4/23648, intron 5 of 17)	1	54665840	54684056	18217	1	51253	uc009vzp.3	78665	ENSG00000116221	MRPL37	mitochondrial ribosomal protein L37
chr1	54837736	54838792	1057	*	MACS_peak_884	74.77	Intron (uc001cxe.4/23648, intron 4 of 17)	1	54691104	54872068	180965	2	23648	uc001cxe.4	33276	ENSG00000157216	SSBP3	single stranded DNA binding protein 3
chr1	55011890	55013185	1296	*	MACS_peak_888	62.89	Promoter (<=1kb)	1	55013807	55064515	50709	1	26027	uc001cxk.3	-622	ENSG00000162390	ACOT11	acyl-CoA thioesterase 11
chr1	55014187	55016229	2043	*	MACS_peak_889	68.42	Promoter (<=1kb)	1	55013807	55100417	86611	1	26027	uc001cxm.2	380	ENSG00000162390	ACOT11	acyl-CoA thioesterase 11
chr1	55031365	55032631	1267	*	MACS_peak_890	70.34	Intron (uc001cxj.2/26027, intron 1 of 14)	1	55013807	55100417	86611	1	26027	uc001cxm.2	17558	ENSG00000162390	ACOT11	acyl-CoA thioesterase 11
chr1	55043280	55044011	732	*	MACS_peak_891	138.13	Intron (uc001cxj.2/26027, intron 1 of 14)	1	55013807	55100417	86611	1	26027	uc001cxm.2	29473	ENSG00000162390	ACOT11	acyl-CoA thioesterase 11
chr1	55166655	55168087	1433	*	MACS_peak_892	115.92	Exon (uc001cxs.2/374977, exon 19 of 24)	1	55181495	55208328	26834	1	7268	uc001cxx.4	-13408	ENSG00000243725	TTC4	tetratricopeptide repeat domain 4
chr1	55270539	55272454	1916	*	MACS_peak_893	56.34	Promoter (<=1kb)	1	55271736	55307937	36202	1	163747	uc001cya.4	0	ENSG00000162398	LEXM	lymphocyte expansion molecule
chr1	55302382	55303338	957	*	MACS_peak_894	254.46	Intron (uc001cya.4/163747, intron 9 of 10)	1	55315300	55331353	16054	2	1718	uc010ooi.1	28015	ENSG00000116133	DHCR24	24-dehydrocholesterol reductase
chr1	55312680	55313915	1236	*	MACS_peak_895	58.99	Downstream (1-2kb)	1	55315300	55331353	16054	2	1718	uc010ooi.1	17438	ENSG00000116133	DHCR24	24-dehydrocholesterol reductase
chr1	56177379	56178240	862	*	MACS_peak_903	57.58	Intron (uc001cyi.1/uc001cyi.1, intron 2 of 2)	1	55691314	55691396	83	1	100616272	uc021ony.1	486065	ENSG00000265822	MIR4422	microRNA 4422
chr1	56199387	56200207	821	*	MACS_peak_904	66.05	3' UTR	1	55691314	55691396	83	1	100616272	uc021ony.1	508073	ENSG00000265822	MIR4422	microRNA 4422
chr1	56973915	56974871	957	*	MACS_peak_912	75.49	Intron (uc001cyj.2/8613, intron 5 of 5)	1	56960419	57045257	84839	2	8613	uc001cyj.2	70386	ENSG00000162407	PLPP3	phospholipid phosphatase 3
chr1	57231178	57232122	945	*	MACS_peak_913	100.01	Intron (uc001cym.4/199920, intron 5 of 19)	1	57184477	57227686	43210	2	199920	uc001cyl.3	-3492	ENSG00000187889	FYB2	FYN binding protein 2
chr1	57462075	57462806	732	*	MACS_peak_914	136.75	Downstream (<1kb)	1	57394883	57431688	36806	2	732	uc010ooo.2	-30387	ENSG00000021852	C8B	complement C8 beta chain
chr1	57491285	57492180	896	*	MACS_peak_915	66.05	Exon (uc001cyq.1/1600, exon 9 of 14)	1	57394883	57431688	36806	2	732	uc010ooo.2	-59597	ENSG00000021852	C8B	complement C8 beta chain
chr1	57718547	57719342	796	*	MACS_peak_916	93.72	Intron (uc001cyq.1/1600, intron 1 of 13)	1	57463579	57756838	293260	2	1600	uc001cyq.1	37496	ENSG00000173406	DAB1	DAB1, reelin adaptor protein
chr1	57792457	57793259	803	*	MACS_peak_917	55.91	Intron (uc001cys.1/1600, intron 3 of 16)	1	57463579	57773037	309459	2	1600	uc009vzw.1	-19420	ENSG00000173406	DAB1	DAB1, reelin adaptor protein
chr1	57984519	57985376	858	*	MACS_peak_918	68.47	Intron (uc001cys.1/1600, intron 3 of 16)	1	57476353	57888872	412520	2	1600	uc009vzx.1	-95647	ENSG00000173406	DAB1	DAB1, reelin adaptor protein
chr1	58089666	58090266	601	*	MACS_peak_919	59.28	Intron (uc001cys.1/1600, intron 3 of 16)	1	57476353	57888872	412520	2	1600	uc009vzx.1	-200794	ENSG00000173406	DAB1	DAB1, reelin adaptor protein
chr1	58350058	58350811	754	*	MACS_peak_920	147.76	Intron (uc001cys.1/1600, intron 1 of 16)	1	57463579	58716211	1252633	2	1600	uc001cys.1	365400	ENSG00000173406	DAB1	DAB1, reelin adaptor protein
chr1	58708313	58708788	476	*	MACS_peak_921	79.05	Intron (uc001cys.1/1600, intron 1 of 16)	1	57463579	58716211	1252633	2	1600	uc001cys.1	7423	ENSG00000173406	DAB1	DAB1, reelin adaptor protein
chr1	58798623	58799191	569	*	MACS_peak_922	76.81	Intron (uc001cyt.1/1600, intron 4 of 20)	1	57463579	58716211	1252633	2	1600	uc001cys.1	-82412	ENSG00000173406	DAB1	DAB1, reelin adaptor protein
chr1	58856927	58857842	916	*	MACS_peak_923	109.14	Intron (uc001cyt.1/1600, intron 3 of 20)	1	57463579	58716211	1252633	2	1600	uc001cys.1	-140716	ENSG00000173406	DAB1	DAB1, reelin adaptor protein
chr1	58869694	58870607	914	*	MACS_peak_924	91.96	Intron (uc001cyt.1/1600, intron 3 of 20)	1	58939504	59004982	65479	2	115209	uc001cyx.1	134375	ENSG00000162600	OMA1	OMA1 zinc metallopeptidase
chr1	58903064	58904667	1604	*	MACS_peak_925	151.34	Intron (uc001cyt.1/1600, intron 3 of 20)	1	58939504	59004982	65479	2	115209	uc001cyx.1	100315	ENSG00000162600	OMA1	OMA1 zinc metallopeptidase
chr1	58941666	58942345	680	*	MACS_peak_926	104.48	Intron (uc001cyt.1/1600, intron 3 of 20)	1	58939504	59004982	65479	2	115209	uc001cyx.1	62637	ENSG00000162600	OMA1	OMA1 zinc metallopeptidase
chr1	58968829	58969569	741	*	MACS_peak_927	65.19	Intron (uc001cyt.1/1600, intron 3 of 20)	1	58939504	59004982	65479	2	115209	uc001cyx.1	35413	ENSG00000162600	OMA1	OMA1 zinc metallopeptidase
chr1	59253983	59254862	880	*	MACS_peak_930	148.81	Intron (uc001czf.2/100131060, intron 1 of 3)	1	59250823	59365384	114562	1	100131060	uc010oop.1	3160	ENSG00000234807	LINC01135	long intergenic non-protein coding RNA 1135
chr1	59919131	59919937	807	*	MACS_peak_934	64.08	Intron (uc001czg.2/55277, intron 4 of 8)	1	59981301	60228402	247102	1	55277	uc001czm.5	-61364	ENSG00000172456	FGGY	FGGY carbohydrate kinase domain containing
chr1	60022141	60023224	1084	*	MACS_peak_935	97.79	Intron (uc001czg.2/55277, intron 7 of 8)	1	59981301	60228402	247102	1	55277	uc001czm.5	40840	ENSG00000172456	FGGY	FGGY carbohydrate kinase domain containing
chr1	60072746	60074112	1367	*	MACS_peak_936	80.72	Exon (uc001czg.2/55277, exon 8 of 9)	1	59981301	60228402	247102	1	55277	uc001czm.5	91445	ENSG00000172456	FGGY	FGGY carbohydrate kinase domain containing
chr1	60208862	60210058	1197	*	MACS_peak_937	93.83	Intron (uc001czi.4/55277, intron 14 of 15)	1	60198899	60198968	70	2	100616409	uc021oob.1	-9894	ENSG00000266150	MIR4711	microRNA 4711
chr1	60216063	60216846	784	*	MACS_peak_938	261.44	Intron (uc001czi.4/55277, intron 14 of 15)	1	60198899	60198968	70	2	100616409	uc021oob.1	-17095	ENSG00000266150	MIR4711	microRNA 4711
chr1	60217940	60219127	1188	*	MACS_peak_939	104.22	Intron (uc001czi.4/55277, intron 14 of 15)	1	60198899	60198968	70	2	100616409	uc021oob.1	-18972	ENSG00000266150	MIR4711	microRNA 4711
chr1	60359874	60360385	512	*	MACS_peak_941	104.01	Intron (uc001czq.3/1573, intron 8 of 8)	1	60358980	60392423	33444	2	1573	uc001czq.3	32038	ENSG00000134716	CYP2J2	cytochrome P450 family 2 subfamily J member 2
chr1	61137823	61138561	739	*	MACS_peak_946	253.88	Intron (uc001czt.1/uc001czt.1, intron 4 of 5)	1	61542946	61928460	385515	1	4774	uc001czy.3	-404385	ENSG00000162599	NFIA	nuclear factor I A
chr1	61436240	61437295	1056	*	MACS_peak_947	62.7	Exon (uc001czu.3/uc001czu.3, exon 1 of 7)	1	61542946	61928460	385515	1	4774	uc001czy.3	-105651	ENSG00000162599	NFIA	nuclear factor I A
chr1	61542343	61543164	822	*	MACS_peak_949	91.56	Promoter (<=1kb)	1	61542946	61928460	385515	1	4774	uc001czy.3	0	ENSG00000162599	NFIA	nuclear factor I A
chr1	61637327	61638152	826	*	MACS_peak_950	108.44	Intron (uc001czy.3/4774, intron 2 of 10)	1	61547980	61928460	380481	1	4774	uc001czw.3	89347	ENSG00000162599	NFIA	nuclear factor I A
chr1	61649802	61650522	721	*	MACS_peak_951	160.12	Intron (uc001czy.3/4774, intron 2 of 10)	1	61547980	61928460	380481	1	4774	uc001czw.3	101822	ENSG00000162599	NFIA	nuclear factor I A
chr1	61869329	61870381	1053	*	MACS_peak_952	185.6	Promoter (<=1kb)	1	61869748	61928460	58713	1	4774	uc001czx.3	0	ENSG00000162599	NFIA	nuclear factor I A
chr1	62256306	62256999	694	*	MACS_peak_954	98.01	Intron (uc009waf.1/10207, intron 8 of 35)	1	62271120	62629176	358057	1	10207	uc001dac.3	-14121	ENSG00000132849	PATJ	PATJ, crumbs cell polarity complex component
chr1	62278344	62279016	673	*	MACS_peak_955	154.52	Intron (uc009waf.1/10207, intron 14 of 35)	1	62271120	62629176	358057	1	10207	uc001dac.3	7224	ENSG00000132849	PATJ	PATJ, crumbs cell polarity complex component
chr1	62549838	62550589	752	*	MACS_peak_956	115.15	Exon (uc009waf.1/10207, exon 33 of 36)	1	62660474	62678001	17528	1	54596	uc001dae.4	-109885	ENSG00000240563	L1TD1	LINE1 type transposase domain containing 1
chr1	62901587	62903411	1825	*	MACS_peak_958	64.08	Promoter (<=1kb)	1	62901975	62917475	15501	1	7398	uc001daj.2	0	ENSG00000162607	USP1	ubiquitin specific peptidase 1
chr1	63694626	63695440	815	*	MACS_peak_961	151.34	Intron (uc001daw.2/199899, intron 4 of 11)	1	63624754	63782901	158148	2	199899	uc001daw.2	87461	ENSG00000224209	LINC00466	long intergenic non-protein coding RNA 466
chr1	63880080	63880985	906	*	MACS_peak_962	136.74	Intron (uc021oof.1/29929, intron 10 of 14)	1	63876817	63904233	27417	1	29929	uc010oox.2	3263	ENSG00000088035	ALG6	ALG6, alpha-1,3-glucosyltransferase
chr1	64103835	64104850	1016	*	MACS_peak_963	161.76	Exon (uc001dbh.3/5236, exon 7 of 11)	1	64088887	64125916	37030	1	5236	uc010ooz.2	14948	ENSG00000079739	PGM1	phosphoglucomutase 1
chr1	64116631	64117428	798	*	MACS_peak_964	253.61	Exon (uc001dbh.3/5236, exon 9 of 11)	1	64088887	64125916	37030	1	5236	uc010ooz.2	27744	ENSG00000079739	PGM1	phosphoglucomutase 1
chr1	64368255	64368941	687	*	MACS_peak_967	288.22	Intron (uc001dbi.4/4919, intron 1 of 6)	1	64239690	64647179	407490	1	4919	uc001dbj.3	128565	ENSG00000185483	ROR1	receptor tyrosine kinase like orphan receptor 1
chr1	64434762	64435915	1154	*	MACS_peak_968	161.03	Intron (uc001dbi.4/4919, intron 1 of 6)	1	64239690	64647179	407490	1	4919	uc001dbj.3	195072	ENSG00000185483	ROR1	receptor tyrosine kinase like orphan receptor 1
chr1	64469961	64470703	743	*	MACS_peak_969	50.06	Intron (uc001dbi.4/4919, intron 1 of 6)	1	64669490	64710027	40538	1	148581	uc001dbn.1	-198787	ENSG00000177414	UBE2U	ubiquitin conjugating enzyme E2 U (putative)
chr1	64485303	64486074	772	*	MACS_peak_970	415.19	Intron (uc001dbi.4/4919, intron 2 of 6)	1	64669490	64710027	40538	1	148581	uc001dbn.1	-183416	ENSG00000177414	UBE2U	ubiquitin conjugating enzyme E2 U (putative)
chr1	64542926	64543867	942	*	MACS_peak_971	51.07	Intron (uc001dbi.4/4919, intron 4 of 6)	1	64669490	64710027	40538	1	148581	uc001dbn.1	-125623	ENSG00000177414	UBE2U	ubiquitin conjugating enzyme E2 U (putative)
chr1	64575268	64576111	844	*	MACS_peak_972	282.04	Intron (uc001dbi.4/4919, intron 4 of 6)	1	64669490	64710027	40538	1	148581	uc001dbn.1	-93379	ENSG00000177414	UBE2U	ubiquitin conjugating enzyme E2 U (putative)
chr1	64586573	64587513	941	*	MACS_peak_973	165.18	Intron (uc001dbi.4/4919, intron 4 of 6)	1	64669490	64710027	40538	1	148581	uc001dbn.1	-81977	ENSG00000177414	UBE2U	ubiquitin conjugating enzyme E2 U (putative)
chr1	64685842	64686365	524	*	MACS_peak_975	69.03	Intron (uc001dbn.1/148581, intron 5 of 8)	1	64669490	64710027	40538	1	148581	uc001dbn.1	16352	ENSG00000177414	UBE2U	ubiquitin conjugating enzyme E2 U (putative)
chr1	64696659	64697445	787	*	MACS_peak_976	77.79	Intron (uc001dbn.1/148581, intron 6 of 8)	1	64669490	64710027	40538	1	148581	uc001dbn.1	27169	ENSG00000177414	UBE2U	ubiquitin conjugating enzyme E2 U (putative)
chr1	64962170	64962673	504	*	MACS_peak_982	94.8	Intron (uc001dbo.1/57685, intron 1 of 26)	1	64971597	65158741	187145	1	57685	uc001dbp.1	-8924	ENSG00000158966	CACHD1	cache domain containing 1
chr1	64965528	64966369	842	*	MACS_peak_983	193.53	Intron (uc001dbo.1/57685, intron 1 of 26)	1	64971597	65158741	187145	1	57685	uc001dbp.1	-5228	ENSG00000158966	CACHD1	cache domain containing 1
chr1	65256598	65257217	620	*	MACS_peak_984	110.9	Intron (uc001dbs.2/55225, intron 5 of 11)	1	65243306	65298914	55609	1	55225	uc010opb.2	13292	ENSG00000162437	RAVER2	ribonucleoprotein, PTB binding 2
chr1	65356529	65357695	1167	*	MACS_peak_985	163.54	Intron (uc001dbu.1/3716, intron 1 of 24)	1	65298906	65311323	12418	2	3716	uc009wal.1	-45206	ENSG00000162434	JAK1	Janus kinase 1
chr1	65382928	65383724	797	*	MACS_peak_986	77.05	Intron (uc001dbu.1/3716, intron 1 of 24)	1	65298906	65432187	133282	2	3716	uc001dbu.1	48463	ENSG00000162434	JAK1	Janus kinase 1
chr1	65675782	65677562	1781	*	MACS_peak_988	54.52	Intron (uc001dby.3/205, intron 3 of 5)	1	65720148	65858548	138401	1	9829	uc001dcc.1	-42586	ENSG00000116675	DNAJC6	DnaJ heat shock protein family (Hsp40) member C6
chr1	65722772	65723367	596	*	MACS_peak_989	145.77	Promoter (2-3kb)	1	65720148	65858548	138401	1	9829	uc001dcc.1	2624	ENSG00000116675	DNAJC6	DnaJ heat shock protein family (Hsp40) member C6
chr1	65874172	65874867	696	*	MACS_peak_990	56.99	Exon (uc001dcd.2/9829, exon 17 of 19)	1	65886131	66096095	209965	1	3953	uc001dcg.3	-11264	ENSG00000116678	LEPR	leptin receptor
chr1	65952042	65952872	831	*	MACS_peak_991	97.96	Intron (uc001dcg.3/3953, intron 2 of 19)	1	65991372	66091917	100546	1	3953	uc021ool.1	-38500	ENSG00000116678	LEPR	leptin receptor
chr1	66411806	66412703	898	*	MACS_peak_992	293.88	Intron (uc001dcn.3/5142, intron 3 of 16)	1	66458390	66840262	381873	1	5142	uc001dcp.3	-45687	ENSG00000184588	PDE4B	phosphodiesterase 4B
chr1	66431267	66431687	421	*	MACS_peak_993	127.31	Intron (uc001dcn.3/5142, intron 3 of 16)	1	66458390	66840262	381873	1	5142	uc001dcp.3	-26703	ENSG00000184588	PDE4B	phosphodiesterase 4B
chr1	66444720	66445515	796	*	MACS_peak_994	61.56	Intron (uc001dcn.3/5142, intron 3 of 16)	1	66458390	66840262	381873	1	5142	uc001dcp.3	-12875	ENSG00000184588	PDE4B	phosphodiesterase 4B
chr1	66712337	66713536	1200	*	MACS_peak_995	136.11	Exon (uc001dcn.3/5142, exon 4 of 17)	1	66797793	66840262	42470	1	5142	uc001dcq.3	-84257	ENSG00000184588	PDE4B	phosphodiesterase 4B
chr1	66736928	66738325	1398	*	MACS_peak_996	285.67	Intron (uc001dcn.3/5142, intron 7 of 16)	1	66797793	66840262	42470	1	5142	uc001dcq.3	-59468	ENSG00000184588	PDE4B	phosphodiesterase 4B
chr1	66743864	66745028	1165	*	MACS_peak_997	163.74	Intron (uc001dcn.3/5142, intron 7 of 16)	1	66797793	66840262	42470	1	5142	uc001dcq.3	-52765	ENSG00000184588	PDE4B	phosphodiesterase 4B
chr1	66758499	66759176	678	*	MACS_peak_998	195.92	Intron (uc001dcn.3/5142, intron 7 of 16)	1	66797793	66840262	42470	1	5142	uc001dcq.3	-38617	ENSG00000184588	PDE4B	phosphodiesterase 4B
chr1	67154420	67154906	487	*	MACS_peak_1001	51.51	Exon (uc001dcr.3/84251, exon 16 of 25)	1	67160377	67210768	50392	1	84251	uc001dcu.3	-5471	ENSG00000118473	SGIP1	SH3 domain GRB2 like endophilin interacting protein 1
chr1	67170635	67171318	684	*	MACS_peak_1002	61.03	Intron (uc001dcr.3/84251, intron 18 of 24)	1	67160377	67210768	50392	1	84251	uc001dcu.3	10258	ENSG00000118473	SGIP1	SH3 domain GRB2 like endophilin interacting protein 1
chr1	67223649	67224543	895	*	MACS_peak_1003	123.43	Intron (uc001dcv.3/200132, intron 2 of 4)	1	67218140	67244730	26591	1	200132	uc009wav.3	5509	ENSG00000152760	TCTEX1D1	Tctex1 domain containing 1
chr1	67602753	67603487	735	*	MACS_peak_1005	109.77	Promoter (1-2kb)	1	67604590	67725650	121061	1	149233	uc009waz.3	-1103	ENSG00000162594	IL23R	interleukin 23 receptor
chr1	67614054	67614924	871	*	MACS_peak_1006	163.31	Intron (uc009waz.3/149233, intron 1 of 10)	1	67604590	67725650	121061	1	149233	uc009waz.3	9464	ENSG00000162594	IL23R	interleukin 23 receptor
chr1	67721763	67723525	1763	*	MACS_peak_1007	155.59	Intron (uc009waz.3/149233, intron 10 of 10)	1	67673299	67725650	52352	1	149233	uc001ddt.3	48464	ENSG00000162594	IL23R	interleukin 23 receptor
chr1	67779360	67780275	916	*	MACS_peak_1008	89.24	5' UTR	1	67773047	67862583	89537	1	3595	uc010oqn.3	6313	ENSG00000081985	IL12RB2	interleukin 12 receptor subunit beta 2
chr1	67895854	67897327	1474	*	MACS_peak_1010	149.21	Promoter (<=1kb)	1	67873493	67896123	22631	2	26135	uc001ddv.3	0	ENSG00000142864	SERBP1	SERPINE1 mRNA binding protein 1
chr1	68150512	68152736	2225	*	MACS_peak_1012	155.59	Promoter (<=1kb)	1	68150860	68154021	3162	1	1647	uc001ddz.2	0	ENSG00000116717	GADD45A	growth arrest and DNA damage inducible alpha
chr1	68215383	68216362	980	*	MACS_peak_1013	55.74	Intron (uc001dea.2/55970, intron 2 of 3)	1	68150860	68154021	3162	1	1647	uc009wbd.2	64523	ENSG00000116717	GADD45A	growth arrest and DNA damage inducible alpha
chr1	68297423	68299060	1638	*	MACS_peak_1014	264.27	Promoter (<=1kb)	1	68297971	68668670	370700	1	100289178	uc001deb.2	0	ENSG00000232284	GNG12-AS1	GNG12 antisense RNA 1
chr1	68340176	68340771	596	*	MACS_peak_1015	95.64	Intron (uc001deb.2/100289178, intron 1 of 9)	1	68167149	68299155	132007	2	55970	uc001dea.2	-41021	ENSG00000172380	GNG12	G protein subunit gamma 12
chr1	68350010	68350764	755	*	MACS_peak_1016	52.37	Intron (uc001deb.2/100289178, intron 1 of 9)	1	68167149	68299155	132007	2	55970	uc001dea.2	-50855	ENSG00000172380	GNG12	G protein subunit gamma 12
chr1	68353539	68354240	702	*	MACS_peak_1017	67.96	Intron (uc001deb.2/100289178, intron 1 of 9)	1	68167149	68299155	132007	2	55970	uc001dea.2	-54384	ENSG00000172380	GNG12	G protein subunit gamma 12
chr1	68697826	68698719	894	*	MACS_peak_1018	91.42	Promoter (<=1kb)	1	68564142	68698284	134143	2	79971	uc001dee.3	0	ENSG00000116729	WLS	wntless Wnt ligand secretion mediator
chr1	68962061	68963246	1186	*	MACS_peak_1020	908.56	Promoter (<=1kb)	1	68939835	68962799	22965	2	55635	uc001del.4	0	ENSG00000024526	DEPDC1	DEP domain containing 1
chr1	68971812	68972483	672	*	MACS_peak_1021	144.1	Intron (uc001den.3/uc001den.3, intron 1 of 2)	1	68939835	68962799	22965	2	55635	uc001dem.4	-9013	ENSG00000024526	DEPDC1	DEP domain containing 1
chr1	70108842	70109572	731	*	MACS_peak_1029	58.16	Intron (uc001deo.1/57554, intron 1 of 7)	1	70032868	70340687	307820	1	57554	uc001deo.1	75974	ENSG00000033122	LRRC7	leucine rich repeat containing 7
chr1	70136536	70137885	1350	*	MACS_peak_1030	79.62	Intron (uc001deo.1/57554, intron 1 of 7)	1	70225858	70589171	363314	1	57554	uc001dep.3	-87973	ENSG00000033122	LRRC7	leucine rich repeat containing 7
chr1	70161989	70162821	833	*	MACS_peak_1031	88.29	Intron (uc001deo.1/57554, intron 2 of 7)	1	70225858	70589171	363314	1	57554	uc001dep.3	-63037	ENSG00000033122	LRRC7	leucine rich repeat containing 7
chr1	70234464	70235035	572	*	MACS_peak_1032	78.7	Intron (uc001deo.1/57554, intron 3 of 7)	1	70225874	70589171	363298	1	57554	uc009wbg.3	8590	ENSG00000033122	LRRC7	leucine rich repeat containing 7
chr1	70293127	70293811	685	*	MACS_peak_1033	53.55	Intron (uc001deo.1/57554, intron 5 of 7)	1	70225874	70589171	363298	1	57554	uc009wbg.3	67253	ENSG00000033122	LRRC7	leucine rich repeat containing 7
chr1	70307041	70307731	691	*	MACS_peak_1034	94.34	Intron (uc001deo.1/57554, intron 7 of 7)	1	70385005	70386000	996	1	5301	uc009wbh.2	-77274	ENSG00000229359	PIN1P1	peptidylprolyl cis/trans isomerase, NIMA-interacting 1 pseudogene 1
chr1	70509252	70510050	799	*	MACS_peak_1035	68.38	Exon (uc001dep.3/57554, exon 20 of 25)	1	70502127	70589171	87045	1	57554	uc001deq.3	7125	ENSG00000033122	LRRC7	leucine rich repeat containing 7
chr1	70686848	70687660	813	*	MACS_peak_1036	109.64	Promoter (<=1kb)	1	70687145	70716186	29042	1	9295	uc001deu.2	0	ENSG00000116754	SRSF11	serine and arginine rich splicing factor 11
chr1	71541333	71542144	812	*	MACS_peak_1040	75.95	Intron (uc001dfs.3/9406, intron 4 of 10)	1	71528974	71546972	17999	2	9406	uc001dfs.3	4828	ENSG00000132485	ZRANB2	zinc finger RANBP2-type containing 2
chr1	71677785	71678453	669	*	MACS_peak_1041	302.06	Intron (uc001dfu.2/100852410, intron 2 of 3)	1	71547007	71703406	156400	1	100852410	uc001dfu.2	130778	ENSG00000229956	ZRANB2-AS2	ZRANB2 antisense RNA 2 (head to head)
chr1	71876956	71877576	621	*	MACS_peak_1043	91.47	Intron (uc001dfv.3/257194, intron 6 of 6)	1	71547007	71703406	156400	1	100852410	uc001dfu.2	329949	ENSG00000229956	ZRANB2-AS2	ZRANB2 antisense RNA 2 (head to head)
chr1	72014795	72015558	764	*	MACS_peak_1044	61.36	Intron (uc001dfv.3/257194, intron 6 of 6)	1	72259915	72302695	42781	2	100852409	uc031pmw.1	287137	ENSG00000228853	NEGR1-IT1	NEGR1 intronic transcript 1
chr1	72028412	72029124	713	*	MACS_peak_1045	96.67	Intron (uc001dfv.3/257194, intron 6 of 6)	1	72259915	72302695	42781	2	100852409	uc031pmw.1	273571	ENSG00000228853	NEGR1-IT1	NEGR1 intronic transcript 1
chr1	72596053	72596566	514	*	MACS_peak_1046	60.28	Intron (uc001dfw.3/257194, intron 1 of 6)	1	71868625	72566614	697990	2	257194	uc001dfv.3	-29439	ENSG00000172260	NEGR1	neuronal growth regulator 1
chr1	72741482	72742011	530	*	MACS_peak_1047	51.86	Intron (uc001dfw.3/257194, intron 1 of 6)	1	71868625	72748405	879781	2	257194	uc001dfw.3	6394	ENSG00000172260	NEGR1	neuronal growth regulator 1
chr1	74653062	74653684	623	*	MACS_peak_1052	101.08	Intron (uc001dfy.4/127255, intron 1 of 7)	1	74491702	74663871	172170	2	127255	uc001dfy.4	10187	ENSG00000162620	LRRIQ3	leucine rich repeats and IQ motif containing 3
chr1	74724439	74725142	704	*	MACS_peak_1053	59.94	Intron (uc001dgc.2/100526835, intron 6 of 18)	1	74701071	75010116	309046	1	51086	uc001dgf.2	23368	ENSG00000116783	TNNI3K	TNNI3 interacting kinase
chr1	75089043	75090051	1009	*	MACS_peak_1054	221.88	Exon (uc001dgh.3/uc001dgh.3, exon 3 of 3)	1	75055011	75100538	45528	2	127254	uc001dgi.4	10487	ENSG00000178965	ERICH3	glutamate rich 3
chr1	75169682	75170560	879	*	MACS_peak_1055	139.52	Downstream (<1kb)	1	75198836	75232360	33525	1	127253	uc001dgn.3	-28276	ENSG00000162623	TYW3	tRNA-yW synthesizing protein 3 homolog
chr1	75756965	75757566	602	*	MACS_peak_1058	67.44	Intron (uc001dgr.2/204962, intron 7 of 25)	1	75600567	75627218	26652	1	431707	uc031pmx.1	156398	ENSG00000162624	LHX8	LIM homeobox 8
chr1	75965385	75966104	720	*	MACS_peak_1059	74.74	Intron (uc001dgr.2/204962, intron 2 of 25)	1	75667816	76076799	408984	2	204962	uc001dgr.2	110695	ENSG00000137968	SLC44A5	solute carrier family 44 member 5
chr1	76032332	76033094	763	*	MACS_peak_1060	91.32	Intron (uc001dgr.2/204962, intron 1 of 25)	1	75667816	76076799	408984	2	204962	uc001dgr.2	43705	ENSG00000137968	SLC44A5	solute carrier family 44 member 5
chr1	76261898	76264156	2259	*	MACS_peak_1061	75.21	Promoter (<=1kb)	1	76262556	76378923	116368	1	4438	uc001dhd.2	0	ENSG00000057468	MSH4	mutS homolog 4
chr1	76539969	76541329	1361	*	MACS_peak_1064	66.8	Promoter (<=1kb)	1	76540389	77042892	502504	1	256435	uc001dhg.4	0	ENSG00000184005	ST6GALNAC3	ST6 N-acetylgalactosaminide alpha-2,6-sialyltransferase 3
chr1	76612953	76614148	1196	*	MACS_peak_1065	67.24	Intron (uc001dhg.4/256435, intron 1 of 3)	1	76540389	77096669	556281	1	256435	uc010orh.1	72564	ENSG00000184005	ST6GALNAC3	ST6 N-acetylgalactosaminide alpha-2,6-sialyltransferase 3
chr1	76704663	76705622	960	*	MACS_peak_1066	197.91	Intron (uc001dhg.4/256435, intron 1 of 3)	1	76540389	77096669	556281	1	256435	uc010orh.1	164274	ENSG00000184005	ST6GALNAC3	ST6 N-acetylgalactosaminide alpha-2,6-sialyltransferase 3
chr1	76706002	76706547	546	*	MACS_peak_1067	55.25	Intron (uc001dhg.4/256435, intron 1 of 3)	1	76540389	77096669	556281	1	256435	uc010orh.1	165613	ENSG00000184005	ST6GALNAC3	ST6 N-acetylgalactosaminide alpha-2,6-sialyltransferase 3
chr1	76953674	76954241	568	*	MACS_peak_1068	70.28	Intron (uc001dhg.4/256435, intron 3 of 3)	1	77333186	77529737	196552	1	81849	uc001dhi.3	-378945	ENSG00000117069	ST6GALNAC5	ST6 N-acetylgalactosaminide alpha-2,6-sialyltransferase 5
chr1	77045899	77046298	400	*	MACS_peak_1069	58.94	Intron (uc001dhh.2/256435, intron 3 of 4)	1	77333186	77529737	196552	1	81849	uc001dhi.3	-286888	ENSG00000117069	ST6GALNAC5	ST6 N-acetylgalactosaminide alpha-2,6-sialyltransferase 5
chr1	77499528	77500383	856	*	MACS_peak_1072	83.3	Intron (uc001dhi.3/81849, intron 2 of 4)	1	77334182	77529737	195556	1	81849	uc009wbw.3	165346	ENSG00000117069	ST6GALNAC5	ST6 N-acetylgalactosaminide alpha-2,6-sialyltransferase 5
chr1	77654372	77654803	432	*	MACS_peak_1073	74.28	Intron (uc001dhk.3/10026, intron 3 of 10)	1	77554667	77685132	130466	2	10026	uc001dhk.3	30329	ENSG00000142892	PIGK	phosphatidylinositol glycan anchor biosynthesis class K
chr1	77979229	77980376	1148	*	MACS_peak_1074	241.16	Intron (uc001dhn.3/26289, intron 10 of 13)	1	78030190	78099090	68901	2	26009	uc001dhp.3	118714	ENSG00000036549	ZZZ3	zinc finger ZZ-type containing 3
chr1	78070661	78071799	1139	*	MACS_peak_1075	255.64	Intron (uc001dhp.3/26009, intron 1 of 10)	1	78030190	78099090	68901	2	26009	uc001dhp.3	27291	ENSG00000036549	ZZZ3	zinc finger ZZ-type containing 3
chr1	78147807	78149521	1715	*	MACS_peak_1076	176.62	Promoter (<=1kb)	1	78030190	78148343	118154	2	26009	uc001dhq.3	0	ENSG00000036549	ZZZ3	zinc finger ZZ-type containing 3
chr1	78262152	78262889	738	*	MACS_peak_1077	73.37	Intron (uc001dhx.4/374986, intron 2 of 15)	1	78268955	78327860	58906	1	374986	uc001dhy.1	-6066	ENSG00000180488	MIGA1	mitoguardin 1
chr1	78533862	78534923	1062	*	MACS_peak_1078	56.02	Intron (uc001dik.3/54810, intron 1 of 5)	1	78511589	78603112	91524	1	54810	uc001dik.3	22273	ENSG00000137960	GIPC2	GIPC PDZ domain containing family member 2
chr1	78696954	78697556	603	*	MACS_peak_1080	103.23	Promoter (1-2kb)	1	78695283	78835147	139865	1	149047	uc009wcc.3	1671	ENSG00000237413	MGC27382	uncharacterized MGC27382
chr1	78794765	78795653	889	*	MACS_peak_1081	102.9	Intron (uc009wcc.3/149047, intron 3 of 5)	1	78695283	78835147	139865	1	149047	uc009wcc.3	99482	ENSG00000237413	MGC27382	uncharacterized MGC27382
chr1	78804636	78805439	804	*	MACS_peak_1082	64.08	Intron (uc009wcc.3/149047, intron 3 of 5)	1	78695283	78835147	139865	1	149047	uc009wcc.3	109353	ENSG00000237413	MGC27382	uncharacterized MGC27382
chr1	78989429	78990217	789	*	MACS_peak_1083	94.32	Intron (uc001dim.3/5737, intron 3 of 3)	1	78956728	79006386	49659	1	5737	uc001din.3	32701	ENSG00000122420	PTGFR	prostaglandin F receptor
chr1	78990860	78991662	803	*	MACS_peak_1084	119.62	Intron (uc001dim.3/5737, intron 3 of 3)	1	78956728	79006386	49659	1	5737	uc001din.3	34132	ENSG00000122420	PTGFR	prostaglandin F receptor
chr1	79431719	79432559	841	*	MACS_peak_1086	94.6	Intron (uc001diq.4/64123, intron 2 of 14)	1	79355449	79472495	117047	2	64123	uc001diq.4	39936	ENSG00000162618	ADGRL4	adhesion G protein-coupled receptor L4
chr1	79435457	79437202	1746	*	MACS_peak_1087	99.59	Intron (uc001diq.4/64123, intron 2 of 14)	1	79355449	79472495	117047	2	64123	uc001diq.4	35293	ENSG00000162618	ADGRL4	adhesion G protein-coupled receptor L4
chr1	81837362	81838141	780	*	MACS_peak_1099	121.96	Intron (uc001dis.3/23266, intron 1 of 8)	1	81771845	82458107	686263	1	23266	uc001dis.3	65517	ENSG00000117114	ADGRL2	adhesion G protein-coupled receptor L2
chr1	81875451	81875976	526	*	MACS_peak_1100	268.32	Intron (uc001dis.3/23266, intron 1 of 8)	1	81771845	82458107	686263	1	23266	uc001dis.3	103606	ENSG00000117114	ADGRL2	adhesion G protein-coupled receptor L2
chr1	84199845	84200665	821	*	MACS_peak_1108	84.15	Intron (uc001diz.4/uc001diz.4, intron 2 of 2)	1	84259598	84379059	119462	2	100847084	uc031pmy.1	178394	ENSG00000264406	MIR548AP	microRNA 548ap
chr1	84220048	84220870	823	*	MACS_peak_1109	189.3	Intron (uc001diz.4/uc001diz.4, intron 1 of 2)	1	84259598	84379059	119462	2	100847084	uc031pmy.1	158189	ENSG00000264406	MIR548AP	microRNA 548ap
chr1	84464374	84465464	1091	*	MACS_peak_1110	52.65	Promoter (<=1kb)	1	84335057	84464833	129777	2	79739	uc001djc.3	0	ENSG00000137941	TTLL7	tubulin tyrosine ligase like 7
chr1	84633665	84634296	632	*	MACS_peak_1111	203.53	Intron (uc001dji.3/5567, intron 1 of 8)	1	84630649	84704181	73533	1	5567	uc001djq.3	3016	ENSG00000142875	PRKACB	protein kinase cAMP-activated catalytic subunit beta
chr1	84790897	84792407	1511	*	MACS_peak_1114	80.89	Exon (uc001djr.3/148418, exon 3 of 4)	1	84810361	84816481	6121	1	148418	uc001djs.3	-17954	ENSG00000203943	SAMD13	sterile alpha motif domain containing 13
chr1	84968323	84969109	787	*	MACS_peak_1115	94.33	Intron (uc001djw.4/2787, intron 2 of 3)	1	84964006	84972262	8257	2	2787	uc001djw.4	3153	ENSG00000174021	GNG5	G protein subunit gamma 5
chr1	84970991	84972652	1662	*	MACS_peak_1116	172.74	Promoter (<=1kb)	1	84964006	84972262	8257	2	2787	uc001djw.4	0	ENSG00000174021	GNG5	G protein subunit gamma 5
chr1	85318969	85320705	1737	*	MACS_peak_1117	86.64	Intron (uc001dkl.2/23566, intron 1 of 1)	1	85279086	85331842	52757	2	23566	uc001dkl.2	11137	ENSG00000171517	LPAR3	lysophosphatidic acid receptor 3
chr1	85492795	85493564	770	*	MACS_peak_1118	160.28	Promoter (2-3kb)	1	85490241	85495642	5402	2	55283	uc031pmz.1	2078	ENSG00000055732	MCOLN3	mucolipin 3
chr1	85665807	85668106	2300	*	MACS_peak_1119	166.27	Promoter (<=1kb)	1	85623356	85666728	43373	2	84144	uc009wcm.3	0	ENSG00000097096	SYDE2	synapse defective Rho GTPase homolog 2
chr1	85929684	85931263	1580	*	MACS_peak_1120	87.43	Promoter (<=1kb)	1	85784168	85930267	146100	2	23576	uc009wco.3	0	ENSG00000153904	DDAH1	dimethylarginine dimethylaminohydrolase 1
chr1	85959974	85961043	1070	*	MACS_peak_1121	74.26	Intron (uc001dlc.3/23576, intron 2 of 6)	1	85784168	85930889	146722	2	23576	uc001dlb.3	-29085	ENSG00000153904	DDAH1	dimethylarginine dimethylaminohydrolase 1
chr1	86045715	86047832	2118	*	MACS_peak_1122	110.64	Promoter (<=1kb)	1	86046444	86049648	3205	1	3491	uc001dle.3	0	ENSG00000142871	CYR61	cysteine rich angiogenic inducer 61
chr1	86173346	86174618	1273	*	MACS_peak_1125	57.63	Promoter (<=1kb)	1	86115106	86174116	59011	2	54680	uc001dlh.3	0	ENSG00000117174	ZNHIT6	zinc finger HIT-type containing 6
chr1	86264613	86264973	361	*	MACS_peak_1127	62.99	Intron (uc001dli.3/255631, intron 24 of 34)	1	86115106	86174116	59011	2	54680	uc010osc.2	-90497	ENSG00000117174	ZNHIT6	zinc finger HIT-type containing 6
chr1	86860475	86862463	1989	*	MACS_peak_1132	77.64	Promoter (<=1kb)	1	86812507	86862025	49519	2	57489	uc001dlp.3	0	ENSG00000122417	ODF2L	outer dense fiber of sperm tails 2 like
chr1	86952058	86953814	1757	*	MACS_peak_1134	54.29	Exon (uc001dls.1/1179, exon 7 of 11)	1	86934395	86965974	31580	1	1179	uc001dlt.3	17663	ENSG00000016490	CLCA1	chloride channel accessory 1
chr1	87044947	87045478	532	*	MACS_peak_1135	51.8	Exon (uc009wcs.3/22802, exon 13 of 14)	1	87012759	87046432	33674	1	22802	uc009wcu.3	32188	ENSG00000016602	CLCA4	chloride channel accessory 4
chr1	87588903	87589807	905	*	MACS_peak_1137	61.27	Intron (uc001dme.2/339524, intron 6 of 7)	1	87595448	87602352	6905	1	339524	uc010osl.2	-5641	ENSG00000267272	LINC01140	long intergenic non-protein coding RNA 1140
chr1	87609780	87611029	1250	*	MACS_peak_1138	72.61	Intron (uc001dme.2/339524, intron 7 of 7)	1	87597609	87602352	4744	1	339524	uc010oso.2	12171	ENSG00000267272	LINC01140	long intergenic non-protein coding RNA 1140
chr1	87619773	87620663	891	*	MACS_peak_1139	51.57	Intron (uc001dme.2/339524, intron 7 of 7)	1	87597609	87602352	4744	1	339524	uc010oso.2	22164	ENSG00000267272	LINC01140	long intergenic non-protein coding RNA 1140
chr1	87634702	87636467	1766	*	MACS_peak_1140	150.89	3' UTR	1	87597609	87602352	4744	1	339524	uc010oso.2	37093	ENSG00000267272	LINC01140	long intergenic non-protein coding RNA 1140
chr1	89049029	89049595	567	*	MACS_peak_1158	154.52	Intron (uc021opn.1/uc021opn.1, intron 1 of 3)	1	89149922	89301938	152017	1	5586	uc001dmn.3	-100327	ENSG00000065243	PKN2	protein kinase N2
chr1	89065239	89066838	1600	*	MACS_peak_1159	114.4	Intron (uc021opn.1/uc021opn.1, intron 1 of 3)	1	89149922	89301938	152017	1	5586	uc001dmn.3	-83084	ENSG00000065243	PKN2	protein kinase N2
chr1	89100712	89102647	1936	*	MACS_peak_1160	122.15	Intron (uc021opn.1/uc021opn.1, intron 1 of 3)	1	89149922	89301938	152017	1	5586	uc001dmn.3	-47275	ENSG00000065243	PKN2	protein kinase N2
chr1	89149269	89150892	1624	*	MACS_peak_1161	158.81	Promoter (<=1kb)	1	89149922	89301938	152017	1	5586	uc001dmn.3	0	ENSG00000065243	PKN2	protein kinase N2
chr1	89356852	89357831	980	*	MACS_peak_1162	515.88	Promoter (<=1kb)	1	89318321	89357301	38981	2	2959	uc001dmo.4	0	ENSG00000137947	GTF2B	general transcription factor IIB
chr1	89481956	89482660	705	*	MACS_peak_1164	60.21	Intron (uc001dmt.3/2635, intron 2 of 10)	1	89472360	89488549	16190	2	2635	uc001dmt.3	5889	ENSG00000117226	GBP3	guanylate binding protein 3
chr1	89609113	89609820	708	*	MACS_peak_1165	122.78	Intron (uc001dmy.1/2634, intron 3 of 14)	1	89571843	89616258	44416	2	2634	uc001dmy.1	6438	ENSG00000162645	GBP2	guanylate binding protein 2
chr1	89644872	89645521	650	*	MACS_peak_1166	77.95	Downstream (1-2kb)	1	89597434	89641723	44290	2	388646	uc001dna.2	-3149	ENSG00000213512	GBP7	guanylate binding protein 7
chr1	89989426	89991331	1906	*	MACS_peak_1169	52.59	Promoter (<=1kb)	1	89990397	90063420	73024	1	23507	uc001dnh.3	0	ENSG00000197147	LRRC8B	leucine rich repeat containing 8 VRAC subunit B
chr1	90285889	90287733	1845	*	MACS_peak_1174	107.18	Promoter (<=1kb)	1	90286573	90401989	115417	1	55144	uc001dnm.3	0	ENSG00000171492	LRRC8D	leucine rich repeat containing 8 VRAC subunit D
chr1	90376839	90377692	854	*	MACS_peak_1175	59.26	Intron (uc001dnm.3/55144, intron 2 of 2)	1	90458824	90460525	1702	2	492303	uc001dno.3	82833	NA	GEMIN8P4	gem nuclear organelle associated protein 8 pseudogene 4
chr1	91802954	91804709	1756	*	MACS_peak_1191	65.15	Intron (uc009wdb.3/164045, intron 3 of 20)	1	91727744	91813033	85290	2	164045	uc001dob.4	8324	ENSG00000162669	HFM1	HFM1, ATP dependent DNA helicase homolog
chr1	91869567	91870577	1011	*	MACS_peak_1192	76.58	Promoter (<=1kb)	1	91726323	91870426	144104	2	164045	uc001doa.4	0	ENSG00000162669	HFM1	HFM1, ATP dependent DNA helicase homolog
chr1	92350057	92352535	2479	*	MACS_peak_1197	125.78	Promoter (<=1kb)	1	92145900	92351836	205937	2	7049	uc001doh.3	0	ENSG00000069702	TGFBR3	transforming growth factor beta receptor 3
chr1	92414050	92415587	1538	*	MACS_peak_1199	88.36	Promoter (<=1kb)	1	92414928	92479985	65058	1	676	uc001dok.4	0	ENSG00000137948	BRDT	bromodomain testis associated
chr1	92495531	92497022	1492	*	MACS_peak_1200	150.61	Promoter (<=1kb)	1	92495533	92529093	33561	1	253152	uc001don.2	0	ENSG00000172031	EPHX4	epoxide hydrolase 4
chr1	92939440	92940386	947	*	MACS_peak_1201	76.09	3' UTR	1	92940318	92949356	9039	2	2672	uc001dou.4	8970	ENSG00000162676	GFI1	growth factor independent 1 transcriptional repressor
chr1	93002404	93003148	745	*	MACS_peak_1203	63.1	Intron (uc001dox.3/7813, intron 17 of 17)	1	92940318	92952433	12116	2	2672	uc001dow.4	-49971	ENSG00000162676	GFI1	growth factor independent 1 transcriptional repressor
chr1	93213092	93214132	1041	*	MACS_peak_1204	115.35	Intron (uc001dox.3/7813, intron 1 of 17)	1	92974253	93257961	283709	2	7813	uc001dox.3	43829	ENSG00000067208	EVI5	ecotropic viral integration site 5
chr1	93249566	93251504	1939	*	MACS_peak_1205	216.85	Intron (uc001dox.3/7813, intron 1 of 17)	1	92974253	93257961	283709	2	7813	uc001dox.3	6457	ENSG00000067208	EVI5	ecotropic viral integration site 5
chr1	94017965	94019320	1356	*	MACS_peak_1211	83.35	3' UTR	1	94009664	94020218	10555	1	54874	uc010otl.2	8301	ENSG00000137942	FNBP1L	formin binding protein 1 like
chr1	94032546	94033797	1252	*	MACS_peak_1212	703.55	Exon (uc001dpx.5/8412, exon 6 of 8)	1	94027343	94050719	23377	2	8412	uc001dpx.5	16922	ENSG00000137936	BCAR3	BCAR3, NSP family adaptor protein
chr1	94039346	94040513	1168	*	MACS_peak_1213	102.55	Intron (uc001dpx.5/8412, intron 4 of 7)	1	94027343	94050719	23377	2	8412	uc001dpx.5	10206	ENSG00000137936	BCAR3	BCAR3, NSP family adaptor protein
chr1	94084875	94088427	3553	*	MACS_peak_1214	62.5	Intron (uc001dpz.4/8412, intron 3 of 11)	1	94027343	94079702	52360	2	8412	uc001dpy.4	-5173	ENSG00000137936	BCAR3	BCAR3, NSP family adaptor protein
chr1	94128064	94130882	2819	*	MACS_peak_1215	69.83	Intron (uc001dpz.4/8412, intron 2 of 11)	1	94027343	94146926	119584	2	8412	uc001dpz.4	16044	ENSG00000137936	BCAR3	BCAR3, NSP family adaptor protein
chr1	94131984	94134164	2181	*	MACS_peak_1216	52.73	Intron (uc001dpz.4/8412, intron 2 of 11)	1	94027343	94146926	119584	2	8412	uc001dpz.4	12762	ENSG00000137936	BCAR3	BCAR3, NSP family adaptor protein
chr1	94134407	94136314	1908	*	MACS_peak_1217	74.13	Intron (uc001dpz.4/8412, intron 2 of 11)	1	94027343	94146926	119584	2	8412	uc001dpz.4	10612	ENSG00000137936	BCAR3	BCAR3, NSP family adaptor protein
chr1	94186229	94189311	3083	*	MACS_peak_1218	98.07	Intron (uc001dqb.4/8412, intron 2 of 13)	1	94027343	94147394	120052	2	8412	uc001dqa.4	-38835	ENSG00000137936	BCAR3	BCAR3, NSP family adaptor protein
chr1	94226154	94230598	4445	*	MACS_peak_1219	54.26	Intron (uc001dqb.4/8412, intron 2 of 13)	1	94027343	94147394	120052	2	8412	uc001dqa.4	-78760	ENSG00000137936	BCAR3	BCAR3, NSP family adaptor protein
chr1	94339510	94340427	918	*	MACS_peak_1220	109.43	Intron (uc001dqf.3/30836, intron 3 of 6)	1	94335014	94344762	9749	2	30836	uc001dqf.3	4335	ENSG00000067334	DNTTIP2	deoxynucleotidyltransferase terminal interacting protein 2
chr1	94495295	94497419	2125	*	MACS_peak_1221	511.14	Exon (uc001dqh.3/24, exon 27 of 50)	1	94475933	94484228	8296	2	24	uc009wdp.1	-11067	ENSG00000198691	ABCA4	ATP binding cassette subfamily A member 4
chr1	94510918	94511843	926	*	MACS_peak_1222	265.8	3' UTR	1	94475933	94484228	8296	2	24	uc009wdp.1	-26690	ENSG00000198691	ABCA4	ATP binding cassette subfamily A member 4
chr1	94531785	94536642	4858	*	MACS_peak_1223	105.51	Intron (uc001dqh.3/24, intron 11 of 49)	1	94475933	94484228	8296	2	24	uc009wdp.1	-47557	ENSG00000198691	ABCA4	ATP binding cassette subfamily A member 4
chr1	94582567	94585317	2751	*	MACS_peak_1224	51.24	Promoter (1-2kb)	1	94458394	94586705	128312	2	24	uc001dqh.3	1388	ENSG00000198691	ABCA4	ATP binding cassette subfamily A member 4
chr1	94735549	94738156	2608	*	MACS_peak_1226	53.65	Promoter (2-3kb)	1	94615403	94740624	125222	2	9411	uc009wdq.1	2468	ENSG00000137962	ARHGAP29	Rho GTPase activating protein 29
chr1	94920899	94921796	898	*	MACS_peak_1229	201.94	Exon (uc010oto.2/5825, exon 2 of 24)	1	94947049	94984219	37171	1	5825	uc001dqo.4	-25253	ENSG00000117528	ABCD3	ATP binding cassette subfamily D member 3
chr1	95197485	95198521	1037	*	MACS_peak_1230	498.91	Exon (uc001dqu.3/uc001dqu.3, exon 2 of 5)	1	95285898	95360803	74906	1	126969	uc001dqv.5	-87377	ENSG00000143036	SLC44A3	solute carrier family 44 member 3
chr1	95220992	95221857	866	*	MACS_peak_1231	120.43	Intron (uc001dqu.3/uc001dqu.3, intron 1 of 4)	1	95285898	95360803	74906	1	126969	uc001dqv.5	-64041	ENSG00000143036	SLC44A3	solute carrier family 44 member 3
chr1	95241463	95243333	1871	*	MACS_peak_1232	338.44	Intron (uc001dqu.3/uc001dqu.3, intron 1 of 4)	1	95285898	95360803	74906	1	126969	uc001dqv.5	-42565	ENSG00000143036	SLC44A3	solute carrier family 44 member 3
chr1	95319444	95321168	1725	*	MACS_peak_1233	96.24	Intron (uc001dqv.5/126969, intron 9 of 14)	1	95292995	95356823	63829	1	126969	uc010otu.1	26449	ENSG00000143036	SLC44A3	solute carrier family 44 member 3
chr1	95329445	95330885	1441	*	MACS_peak_1234	110	Exon (uc001dqv.5/126969, exon 11 of 15)	1	95292995	95356823	63829	1	126969	uc010otu.1	36450	ENSG00000143036	SLC44A3	solute carrier family 44 member 3
chr1	95390546	95393820	3275	*	MACS_peak_1235	93.5	Promoter (<=1kb)	1	95362507	95391337	28831	2	1266	uc010otv.2	0	ENSG00000117519	CNN3	calponin 3
chr1	95422314	95423691	1378	*	MACS_peak_1236	116.11	Intron (uc021oqc.2/729970, intron 2 of 3)	1	95393584	95428826	35243	1	729970	uc021oqc.2	28730	ENSG00000235501	LOC729970	hCG2028352-like
chr1	95454799	95456276	1478	*	MACS_peak_1237	98.07	Intron (uc001dra.2/199857, intron 3 of 3)	1	95393584	95428826	35243	1	729970	uc021oqc.2	61215	ENSG00000235501	LOC729970	hCG2028352-like
chr1	95694381	95695112	732	*	MACS_peak_1238	198.35	Intron (uc001drd.4/100527978, intron 6 of 7)	1	95699711	95710509	10799	1	100527978	uc009wdt.3	-4599	ENSG00000271092	TMEM56-RWDD3	TMEM56-RWDD3 readthrough
chr1	97604294	97604857	564	*	MACS_peak_1250	74.68	Intron (uc031pne.1/100873932, intron 1 of 4)	1	97561479	97788511	227033	1	100873932	uc031pne.1	42815	ENSG00000232878	DPYD-AS1	DPYD antisense RNA 1
chr1	97680969	97681785	817	*	MACS_peak_1251	712.5	Intron (uc031pne.1/100873932, intron 1 of 4)	1	97561479	97788511	227033	1	100873932	uc031pne.1	119490	ENSG00000232878	DPYD-AS1	DPYD antisense RNA 1
chr1	97685402	97686211	810	*	MACS_peak_1252	101.12	Intron (uc031pne.1/100873932, intron 1 of 4)	1	97561479	97788511	227033	1	100873932	uc031pne.1	123923	ENSG00000232878	DPYD-AS1	DPYD antisense RNA 1
chr1	97688429	97689070	642	*	MACS_peak_1253	56.37	Intron (uc031pne.1/100873932, intron 1 of 4)	1	97561479	97788511	227033	1	100873932	uc031pne.1	126950	ENSG00000232878	DPYD-AS1	DPYD antisense RNA 1
chr1	97696603	97697336	734	*	MACS_peak_1254	90.62	Intron (uc031pne.1/100873932, intron 1 of 4)	1	97561479	97788511	227033	1	100873932	uc031pne.1	135124	ENSG00000232878	DPYD-AS1	DPYD antisense RNA 1
chr1	97923208	97923921	714	*	MACS_peak_1255	51.52	Intron (uc001drv.3/1806, intron 13 of 22)	1	97561479	97788511	227033	1	100873932	uc031pne.1	361729	ENSG00000232878	DPYD-AS1	DPYD antisense RNA 1
chr1	97969969	97970611	643	*	MACS_peak_1256	66.11	Intron (uc001drv.3/1806, intron 13 of 22)	1	97561479	97788511	227033	1	100873932	uc031pne.1	408490	ENSG00000232878	DPYD-AS1	DPYD antisense RNA 1
chr1	98026207	98026948	742	*	MACS_peak_1257	640.93	Intron (uc001drv.3/1806, intron 11 of 22)	1	97543300	98386615	843316	2	1806	uc001drv.3	359667	ENSG00000188641	DPYD	dihydropyrimidine dehydrogenase
chr1	98091110	98091776	667	*	MACS_peak_1258	66.05	Intron (uc001drv.3/1806, intron 8 of 22)	1	97543300	98386615	843316	2	1806	uc001drv.3	294839	ENSG00000188641	DPYD	dihydropyrimidine dehydrogenase
chr1	98103872	98104750	879	*	MACS_peak_1259	56.62	Intron (uc001drv.3/1806, intron 8 of 22)	1	97543300	98386615	843316	2	1806	uc001drv.3	281865	ENSG00000188641	DPYD	dihydropyrimidine dehydrogenase
chr1	98274489	98275713	1225	*	MACS_peak_1260	58.37	Intron (uc001drv.3/1806, intron 3 of 22)	1	97543300	98386615	843316	2	1806	uc001drv.3	110902	ENSG00000188641	DPYD	dihydropyrimidine dehydrogenase
chr1	98310001	98312254	2254	*	MACS_peak_1261	285.17	Intron (uc001drv.3/1806, intron 2 of 22)	1	97543300	98386615	843316	2	1806	uc001drv.3	74361	ENSG00000188641	DPYD	dihydropyrimidine dehydrogenase
chr1	98342506	98343489	984	*	MACS_peak_1262	489.42	Intron (uc001drv.3/1806, intron 2 of 22)	1	97543300	98386615	843316	2	1806	uc001drv.3	43126	ENSG00000188641	DPYD	dihydropyrimidine dehydrogenase
chr1	99584577	99585372	796	*	MACS_peak_1268	305.1	Intron (uc001dsd.1/100129620, intron 1 of 2)	1	99355801	99470449	114649	2	163404	uc001dsc.3	-114128	ENSG00000117598	PLPPR5	phospholipid phosphatase related 5
chr1	99602194	99603003	810	*	MACS_peak_1269	58.53	Intron (uc001dsd.1/100129620, intron 1 of 2)	1	99729848	99775138	45291	1	9890	uc001dse.3	-126845	ENSG00000117600	PLPPR4	phospholipid phosphatase related 4
chr1	100149953	100150841	889	*	MACS_peak_1273	52.36	Intron (uc001dsg.3/54873, intron 3 of 7)	1	100111431	100160097	48667	1	54873	uc001dsg.3	38522	ENSG00000099260	PALMD	palmdelphin
chr1	100154985	100155640	656	*	MACS_peak_1274	206.28	Exon (uc001dsg.3/54873, exon 7 of 8)	1	100111431	100160097	48667	1	54873	uc001dsg.3	43554	ENSG00000099260	PALMD	palmdelphin
chr1	100314887	100316381	1495	*	MACS_peak_1276	51.38	Promoter (<=1kb)	1	100315640	100389579	73940	1	178	uc001dsi.1	0	ENSG00000162688	AGL	amylo-alpha-1, 6-glucosidase, 4-alpha-glucanotransferase
chr1	100434813	100436311	1499	*	MACS_peak_1278	53.62	Promoter (<=1kb)	1	100435345	100492534	57190	1	23443	uc001dsp.2	0	ENSG00000117620	SLC35A3	solute carrier family 35 member A3
chr1	100503082	100504610	1529	*	MACS_peak_1279	71.83	Promoter (<=1kb)	1	100503789	100548929	45141	1	64645	uc001dst.3	0	ENSG00000156875	MFSD14A	major facilitator superfamily domain containing 14A
chr1	100816577	100819304	2728	*	MACS_peak_1281	50.91	Promoter (<=1kb)	1	100818023	100856616	38594	1	8556	uc009wec.1	0	ENSG00000079335	CDC14A	cell division cycle 14A
chr1	100963435	100965144	1710	*	MACS_peak_1282	87.17	3' UTR	1	101003728	101007583	3856	1	54112	uc001dth.3	-38584	ENSG00000181656	GPR88	G protein-coupled receptor 88
chr1	101202241	101202876	636	*	MACS_peak_1284	94.6	Intron (uc001dti.3/7412, intron 8 of 8)	1	101185196	101204601	19406	1	7412	uc010ouj.2	17045	ENSG00000162692	VCAM1	vascular cell adhesion molecule 1
chr1	101360062	101362684	2623	*	MACS_peak_1286	125.63	Promoter (<=1kb)	1	101361632	101447311	85680	1	148867	uc001dtn.2	0	ENSG00000162695	SLC30A7	solute carrier family 30 member 7
chr1	103432203	103433022	820	*	MACS_peak_1292	67.59	Intron (uc001duk.3/1301, intron 34 of 63)	1	103342023	103496800	154778	2	1301	uc001duk.3	63778	ENSG00000060718	COL11A1	collagen type XI alpha 1 chain
chr1	104111867	104113371	1505	*	MACS_peak_1296	85.07	Promoter (<=1kb)	1	104112335	104122149	9815	1	280	uc001dur.3	0	ENSG00000240038	AMY2B	amylase, alpha 2B (pancreatic)
chr1	108017008	108017801	794	*	MACS_peak_1322	95.7	Intron (uc001dvc.4/22854, intron 5 of 5)	1	107937776	108024475	86700	1	22854	uc009wem.3	79232	ENSG00000162631	NTNG1	netrin G1
chr1	108024457	108025279	823	*	MACS_peak_1323	79.91	3' UTR	1	107937776	108024475	86700	1	22854	uc009wem.3	86681	ENSG00000162631	NTNG1	netrin G1
chr1	108207653	108208760	1108	*	MACS_peak_1327	87.55	Intron (uc010ouu.1/10451, intron 1 of 9)	1	108113782	108220631	106850	2	10451	uc010ouu.1	11871	ENSG00000134215	VAV3	vav guanine nucleotide exchange factor 3
chr1	108281688	108282615	928	*	MACS_peak_1328	51.96	Intron (uc001dvk.1/10451, intron 15 of 26)	1	108113782	108231126	117345	2	10451	uc010ouv.1	-50562	ENSG00000134215	VAV3	vav guanine nucleotide exchange factor 3
chr1	108469441	108471096	1656	*	MACS_peak_1329	53.09	Intron (uc001dvk.1/10451, intron 1 of 26)	1	108211463	108506218	294756	2	10451	uc001dvl.1	35122	ENSG00000134215	VAV3	vav guanine nucleotide exchange factor 3
chr1	108521282	108522199	918	*	MACS_peak_1330	109.98	Intron (uc031pnj.1/100873946, intron 1 of 2)	1	108211463	108507545	296083	2	10451	uc010oux.1	-13737	ENSG00000134215	VAV3	vav guanine nucleotide exchange factor 3
chr1	108741737	108743847	2111	*	MACS_peak_1334	120.46	Promoter (<=1kb)	1	108677344	108742980	65637	2	29957	uc001dvn.5	0	ENSG00000085491	SLC25A24	solute carrier family 25 member 24
chr1	109098649	109100439	1791	*	MACS_peak_1335	90.04	Promoter (2-3kb)	1	109102971	109181949	78979	1	284611	uc010ouy.2	-2532	ENSG00000162636	FAM102B	family with sequence similarity 102 member B
chr1	109113391	109114198	808	*	MACS_peak_1336	161.66	Intron (uc010ouy.2/284611, intron 1 of 10)	1	109102971	109181949	78979	1	284611	uc010ouy.2	10420	ENSG00000162636	FAM102B	family with sequence similarity 102 member B
chr1	109234583	109236455	1873	*	MACS_peak_1337	65	Promoter (<=1kb)	1	109234932	109244422	9491	1	55119	uc001dvv.4	0	ENSG00000134186	PRPF38B	pre-mRNA processing factor 38B
chr1	109358733	109360196	1464	*	MACS_peak_1338	108.34	3' UTR	1	109358520	109399726	41207	2	254268	uc001dwa.4	39530	ENSG00000162641	AKNAD1	AKNA domain containing 1
chr1	109505352	109507042	1691	*	MACS_peak_1339	66.21	Promoter (<=1kb)	1	109472130	109506121	33992	2	23155	uc001dwf.2	0	ENSG00000121940	CLCC1	chloride channel CLIC like 1
chr1	109733710	109734776	1067	*	MACS_peak_1340	109.32	Exon (uc009wex.2/57535, exon 11 of 20)	1	109730601	109749403	18803	1	57535	uc001dwr.3	3109	ENSG00000116299	KIAA1324	KIAA1324
chr1	109802826	109809107	6282	*	MACS_peak_1341	149.87	Exon (uc001dxa.4/1952, exon 3 of 34)	1	109792641	109818378	25738	1	1952	uc001dxa.4	10185	ENSG00000143126	CELSR2	cadherin EGF LAG seven-pass G-type receptor 2
chr1	109809530	109818021	8492	*	MACS_peak_1342	77.1	3' UTR	1	109822176	109825041	2866	2	84722	uc001dxb.3	7020	ENSG00000134222	PSRC1	proline and serine rich coiled-coil 1
chr1	109824955	109826561	1607	*	MACS_peak_1343	53.02	Promoter (<=1kb)	1	109822176	109825041	2866	2	84722	uc001dxb.3	0	ENSG00000134222	PSRC1	proline and serine rich coiled-coil 1
chr1	109833485	109834211	727	*	MACS_peak_1344	111.28	Downstream (<1kb)	1	109822176	109825808	3633	2	84722	uc001dxj.3	-7677	ENSG00000134222	PSRC1	proline and serine rich coiled-coil 1
chr1	110049607	110053399	3793	*	MACS_peak_1346	65.08	Promoter (<=1kb)	1	110049446	110052336	2891	2	57463	uc001dxx.4	0	ENSG00000181754	AMIGO1	adhesion molecule with Ig like domain 1
chr1	110145683	110146573	891	*	MACS_peak_1347	102.47	3' UTR	1	110141515	110141589	75	1	406974	uc010ovq.1	4168	ENSG00000284443	MIR197	microRNA 197
chr1	110197942	110199545	1604	*	MACS_peak_1348	64.44	Promoter (<=1kb)	1	110198698	110217908	19211	1	2946	uc001dyi.3	0	ENSG00000213366	GSTM2	glutathione S-transferase mu 2
chr1	110525994	110528906	2913	*	MACS_peak_1359	91.42	Promoter (<=1kb)	1	110527387	110566364	38978	1	10768	uc001dyx.3	0	ENSG00000168710	AHCYL1	adenosylhomocysteinase like 1
chr1	110538324	110539734	1411	*	MACS_peak_1360	280.04	Intron (uc001dyx.3/10768, intron 1 of 16)	1	110543549	110566364	22816	1	10768	uc021ork.1	-3815	ENSG00000168710	AHCYL1	adenosylhomocysteinase like 1
chr1	110576870	110578417	1548	*	MACS_peak_1361	57.41	Promoter (<=1kb)	1	110577223	110597424	20202	1	85369	uc001dza.2	0	ENSG00000143093	STRIP1	striatin interacting protein 1
chr1	110580754	110586865	6112	*	MACS_peak_1362	93.89	5' UTR	1	110577223	110597424	20202	1	85369	uc009wfp.2	3531	ENSG00000143093	STRIP1	striatin interacting protein 1
chr1	110601303	110604859	3557	*	MACS_peak_1363	81.3	3' UTR	1	110602997	110613322	10326	2	257	uc001dzb.3	8463	ENSG00000156150	ALX3	ALX homeobox 3
chr1	110605098	110609180	4083	*	MACS_peak_1364	62.02	Exon (uc001dzb.3/257, exon 2 of 4)	1	110602997	110613322	10326	2	257	uc001dzb.3	4142	ENSG00000156150	ALX3	ALX homeobox 3
chr1	110713134	110718087	4954	*	MACS_peak_1369	66.95	Exon (uc009wfq.3/388662, exon 3 of 12)	1	110735128	110737566	2439	1	388662	uc001dze.1	-17041	ENSG00000197106	SLC6A17	solute carrier family 6 member 17
chr1	110718298	110721093	2796	*	MACS_peak_1370	478.12	Exon (uc009wfq.3/388662, exon 6 of 12)	1	110735128	110737566	2439	1	388662	uc001dze.1	-14035	ENSG00000197106	SLC6A17	solute carrier family 6 member 17
chr1	110729081	110730433	1353	*	MACS_peak_1371	142.69	Intron (uc009wfq.3/388662, intron 6 of 11)	1	110735128	110737566	2439	1	388662	uc001dze.1	-4695	ENSG00000197106	SLC6A17	solute carrier family 6 member 17
chr1	110730621	110731910	1290	*	MACS_peak_1372	74.72	Intron (uc009wfq.3/388662, intron 6 of 11)	1	110735128	110737566	2439	1	388662	uc001dze.1	-3218	ENSG00000197106	SLC6A17	solute carrier family 6 member 17
chr1	110869324	110870144	821	*	MACS_peak_1373	105.16	Intron (uc001dzj.3/440600, intron 1 of 3)	1	110828999	110881793	52795	2	440600	uc001dzj.3	11649	ENSG00000227963	RBM15-AS1	RBM15 antisense RNA 1
chr1	110880255	110884664	4410	*	MACS_peak_1374	517.34	Promoter (<=1kb)	1	110828999	110881793	52795	2	440600	uc001dzj.3	0	ENSG00000227963	RBM15-AS1	RBM15 antisense RNA 1
chr1	110949545	110950946	1402	*	MACS_peak_1375	299.57	Promoter (<=1kb)	1	110950431	110958896	8466	1	101410535	uc031pnm.1	0	NA	LAMTOR5-AS1	LAMTOR5 antisense RNA 1
chr1	110994945	111000133	5189	*	MACS_peak_1378	272.7	Promoter (1-2kb)	1	110993788	110999976	6189	1	84432	uc001dzs.3	1157	ENSG00000143125	PROK1	prokineticin 1
chr1	111018764	111020764	2001	*	MACS_peak_1379	94.43	Promoter (2-3kb)	1	111016378	111031285	14908	1	643160	uc009wft.1	2386	ENSG00000240194	CYMP	chymosin pseudogene
chr1	111020779	111022769	1991	*	MACS_peak_1380	67.05	Promoter (<=1kb)	1	111023388	111033891	10504	1	643160	uc009wfu.1	-619	ENSG00000240194	CYMP	chymosin pseudogene
chr1	111022974	111025015	2042	*	MACS_peak_1381	102.23	Promoter (<=1kb)	1	111023388	111033891	10504	1	643160	uc009wfu.1	0	ENSG00000240194	CYMP	chymosin pseudogene
chr1	111062236	111063614	1379	*	MACS_peak_1382	177.04	Promoter (<=1kb)	1	111059839	111061797	1959	2	3744	uc001dzt.1	-439	ENSG00000143105	KCNA10	potassium voltage-gated channel subfamily A member 10
chr1	111413406	111414684	1279	*	MACS_peak_1389	118.8	Promoter (<=1kb)	1	111413821	111442558	28738	1	963	uc001dzw.3	0	ENSG00000143119	CD53	CD53 molecule
chr1	111741368	111743343	1976	*	MACS_peak_1390	136.15	Promoter (<=1kb)	1	111728591	111743325	14735	2	79961	uc001eak.2	0	ENSG00000162777	DENND2D	DENN domain containing 2D
chr1	111888595	111889848	1254	*	MACS_peak_1394	89.11	Promoter (<=1kb)	1	111889195	111895639	6445	1	128344	uc001eaw.2	0	ENSG00000173947	PIFO	primary cilia formation
chr1	112035744	112036456	713	*	MACS_peak_1395	133.51	Intron (uc001ebf.3/140, intron 1 of 5)	1	112025970	112046743	20774	2	140	uc001ebf.3	10287	ENSG00000282608	ADORA3	adenosine A3 receptor
chr1	112219991	112220741	751	*	MACS_peak_1396	167.8	Intron (uc001ebi.3/5906, intron 1 of 7)	1	112162405	112256101	93697	1	5906	uc001ebl.3	57586	ENSG00000116473	RAP1A	RAP1A, member of RAS oncogene family
chr1	112280224	112282786	2563	*	MACS_peak_1397	120.2	Promoter (<=1kb)	1	112282463	112290420	7958	1	100506343	uc001ebq.1	0	ENSG00000227811	FAM212B-AS1	FAM212B antisense RNA 1
chr1	112288092	112291150	3059	*	MACS_peak_1398	50.06	Exon (uc001ebq.1/100506343, exon 3 of 3)	1	112282463	112290420	7958	1	100506343	uc021ort.1	5629	ENSG00000227811	FAM212B-AS1	FAM212B antisense RNA 1
chr1	112297370	112298967	1598	*	MACS_peak_1399	110.48	Promoter (<=1kb)	1	112298190	112310199	12010	1	11218	uc001ebs.3	0	ENSG00000064703	DDX20	DEAD-box helicase 20
chr1	112411102	112411890	789	*	MACS_peak_1400	87.3	Intron (uc001ebu.1/3752, intron 2 of 7)	1	112303019	112310199	7181	1	11218	uc001ebt.3	108083	ENSG00000064703	DDX20	DEAD-box helicase 20
chr1	112445533	112447954	2422	*	MACS_peak_1401	139.89	Intron (uc001ebu.1/3752, intron 2 of 7)	1	112318454	112531777	213324	2	3752	uc001ebu.1	83823	ENSG00000171385	KCND3	potassium voltage-gated channel subfamily D member 3
chr1	112449428	112450627	1200	*	MACS_peak_1402	103.45	Intron (uc001ebu.1/3752, intron 2 of 7)	1	112318454	112531777	213324	2	3752	uc001ebu.1	81150	ENSG00000171385	KCND3	potassium voltage-gated channel subfamily D member 3
chr1	112531933	112534112	2180	*	MACS_peak_1403	50.55	Promoter (<=1kb)	1	112533190	112541463	8274	1	643355	uc001ebw.4	0	ENSG00000231437	LINC01750	long intergenic non-protein coding RNA 1750
chr1	113006653	113010271	3619	*	MACS_peak_1411	64.96	Promoter (<=1kb)	1	113010040	113063910	53871	1	7482	uc001eca.3	0	ENSG00000134245	WNT2B	Wnt family member 2B
chr1	113030554	113031383	830	*	MACS_peak_1412	176.33	Intron (uc001eca.3/7482, intron 1 of 5)	1	113051370	113063910	12541	1	7482	uc001ecb.3	-19987	ENSG00000134245	WNT2B	Wnt family member 2B
chr1	113246708	113250549	3842	*	MACS_peak_1413	73.3	Promoter (<=1kb)	1	113243749	113249678	5930	2	389	uc001ecp.1	0	ENSG00000155366	RHOC	ras homolog family member C
chr1	113497828	113500419	2592	*	MACS_peak_1417	332.14	Promoter (<=1kb)	1	113454470	113498685	44216	2	6566	uc001ecx.3	0	ENSG00000155380	SLC16A1	solute carrier family 16 member 1
chr1	113527615	113528222	608	*	MACS_peak_1418	69.15	Intron (uc001edc.1/uc001edc.1, intron 2 of 2)	1	113454470	113498975	44506	2	6566	uc001ecy.3	-28640	ENSG00000155380	SLC16A1	solute carrier family 16 member 1
chr1	114446639	114448363	1725	*	MACS_peak_1424	51.76	Promoter (<=1kb)	1	114437371	114447525	10155	2	10717	uc001eeb.3	0	ENSG00000134262	AP4B1	adaptor related protein complex 4 beta 1 subunit
chr1	114675181	114681016	5836	*	MACS_peak_1426	83.29	Exon (uc021orz.1/148281, exon 3 of 8)	1	114631914	114695062	63149	2	148281	uc021orz.1	14046	ENSG00000134207	SYT6	synaptotagmin 6
chr1	114945268	114946070	803	*	MACS_peak_1429	65.17	Exon (uc010owr.2/51592, exon 11 of 15)	1	114946948	114949722	2775	2	51592	uc001eey.1	3652	ENSG00000197323	TRIM33	tripartite motif containing 33
chr1	115067460	115068049	590	*	MACS_peak_1430	193.87	Intron (uc001eez.3/163259, intron 29 of 29)	1	114935399	115053781	118383	2	51592	uc001eex.3	-13679	ENSG00000197323	TRIM33	tripartite motif containing 33
chr1	115258987	115259891	905	*	MACS_peak_1431	111.79	Promoter (<=1kb)	1	115247085	115259515	12431	2	4893	uc009wgu.3	0	ENSG00000213281	NRAS	NRAS proto-oncogene, GTPase
chr1	115401629	115402302	674	*	MACS_peak_1435	54	Intron (uc001efq.3/6847, intron 6 of 31)	1	115397455	115537990	140536	1	6847	uc010owt.2	4174	ENSG00000198765	SYCP1	synaptonemal complex protein 1
chr1	115434466	115435782	1317	*	MACS_peak_1436	55.17	Intron (uc001efq.3/6847, intron 15 of 31)	1	115397455	115537990	140536	1	6847	uc010owt.2	37011	ENSG00000198765	SYCP1	synaptonemal complex protein 1
chr1	115608390	115609047	658	*	MACS_peak_1437	135.82	Intron (uc001eft.3/10100, intron 2 of 7)	1	115590633	115632121	41489	2	10100	uc001eft.3	23074	ENSG00000134198	TSPAN2	tetraspanin 2
chr1	116198942	116200198	1257	*	MACS_peak_1444	143.47	Intron (uc001efv.1/81839, intron 2 of 7)	1	116185250	116240845	55596	1	81839	uc021ose.1	13692	ENSG00000173218	VANGL1	VANGL planar cell polarity protein 1
chr1	116241277	116242591	1315	*	MACS_peak_1445	92.25	Downstream (<1kb)	1	116185250	116240845	55596	1	81839	uc021ose.1	56027	ENSG00000173218	VANGL1	VANGL planar cell polarity protein 1
chr1	116305132	116306458	1327	*	MACS_peak_1446	202.62	Intron (uc001efx.4/845, intron 1 of 10)	1	116242626	116311426	68801	2	845	uc001efx.4	4968	ENSG00000118729	CASQ2	calsequestrin 2
chr1	116820729	116822097	1369	*	MACS_peak_1453	130.95	Exon (uc021osg.1/uc021osg.1, exon 1 of 1)	1	116915004	116946597	31594	1	476	uc010owv.1	-92907	ENSG00000163399	ATP1A1	ATPase Na+/K+ transporting subunit alpha 1
chr1	116956748	116957362	615	*	MACS_peak_1456	227.72	Intron (uc009whb.2/84852, intron 1 of 2)	1	116935487	116961244	25758	2	84852	uc009whb.2	3882	ENSG00000203865	ATP1A1-AS1	ATP1A1 antisense RNA 1
chr1	117167861	117168395	535	*	MACS_peak_1465	66.83	Intron (uc031pnr.1/3321, intron 1 of 10)	1	117127161	117150953	23793	2	3321	uc001egs.1	-16908	ENSG00000143061	IGSF3	immunoglobulin superfamily member 3
chr1	117185704	117186992	1289	*	MACS_peak_1466	213.5	Intron (uc031pnr.1/3321, intron 1 of 10)	1	117117020	117209578	92559	2	3321	uc031pnr.1	22586	ENSG00000143061	IGSF3	immunoglobulin superfamily member 3
chr1	117203583	117205674	2092	*	MACS_peak_1467	176.07	Intron (uc031pnr.1/3321, intron 1 of 10)	1	117117020	117209578	92559	2	3321	uc031pnr.1	3904	ENSG00000143061	IGSF3	immunoglobulin superfamily member 3
chr1	117459004	117460469	1466	*	MACS_peak_1474	68.02	Intron (uc001egv.1/5738, intron 1 of 8)	1	117452689	117532972	80284	1	5738	uc001egv.1	6315	ENSG00000134247	PTGFRN	prostaglandin F2 receptor inhibitor
chr1	117464600	117465675	1076	*	MACS_peak_1475	70.11	Intron (uc001egv.1/5738, intron 1 of 8)	1	117452689	117532972	80284	1	5738	uc001egv.1	11911	ENSG00000134247	PTGFRN	prostaglandin F2 receptor inhibitor
chr1	117513920	117515194	1275	*	MACS_peak_1476	57.28	Intron (uc001egv.1/5738, intron 6 of 8)	1	117544372	117579173	34802	1	9398	uc009whd.4	-29178	ENSG00000134256	CD101	CD101 molecule
chr1	117714116	117715382	1267	*	MACS_peak_1477	346.03	Intron (uc021osn.1/79679, intron 1 of 5)	1	117686209	117746458	60250	2	79679	uc021osn.1	31076	ENSG00000134258	VTCN1	V-set domain containing T-cell activation inhibitor 1
chr1	117908612	117911048	2437	*	MACS_peak_1479	117.1	Promoter (<=1kb)	1	117910085	118042176	132092	1	10905	uc009whg.1	0	ENSG00000198162	MAN1A2	mannosidase alpha class 1A member 2
chr1	117918666	117919466	801	*	MACS_peak_1480	68.86	Intron (uc009whg.1/10905, intron 1 of 8)	1	117910085	118068320	158236	1	10905	uc001ehd.1	8581	ENSG00000198162	MAN1A2	mannosidase alpha class 1A member 2
chr1	118471356	118473198	1843	*	MACS_peak_1487	84.75	Promoter (<=1kb)	1	118472372	118484470	12099	1	10885	uc001ehh.2	0	ENSG00000065183	WDR3	WD repeat domain 3
chr1	118639925	118640701	777	*	MACS_peak_1488	102.69	Exon (uc001ehk.2/200162, exon 7 of 49)	1	118584426	118623942	39517	2	200162	uc021oss.1	-15983	ENSG00000155761	SPAG17	sperm associated antigen 17
chr1	118694385	118695287	903	*	MACS_peak_1489	116.34	Intron (uc001ehk.2/200162, intron 1 of 48)	1	118496288	118727848	231561	2	200162	uc001ehk.2	32561	ENSG00000155761	SPAG17	sperm associated antigen 17
chr1	119478461	119479196	736	*	MACS_peak_1494	229.13	Intron (uc001ehl.1/6913, intron 1 of 7)	1	119425666	119441748	16083	2	6913	uc009whj.1	-36713	ENSG00000092607	TBX15	T-box 15
chr1	119682343	119683909	1567	*	MACS_peak_1495	55.2	Promoter (<=1kb)	1	119573839	119682973	109135	2	10352	uc010oxf.2	0	ENSG00000116874	WARS2	tryptophanyl tRNA synthetase 2, mitochondrial
chr1	119788286	119789719	1434	*	MACS_peak_1496	92.85	Intron (uc001ehp.1/uc001ehp.1, intron 4 of 6)	1	119573839	119683295	109457	2	10352	uc010oxh.2	-104991	ENSG00000116874	WARS2	tryptophanyl tRNA synthetase 2, mitochondrial
chr1	120114040	120115771	1732	*	MACS_peak_1502	72.55	Exon (uc021osu.1/128102, exon 1 of 1)	1	120106503	120115199	8697	1	128102	uc021osu.1	7537	NA	HSD3BP4	hydroxy-delta-5-steroid dehydrogenase, 3 beta, pseudogene 4
chr1	120137774	120139905	2132	*	MACS_peak_1503	133.86	Promoter (2-3kb)	1	120140325	120141914	1590	2	644242	uc021osv.1	2009	ENSG00000260941	LINC00622	long intergenic non-protein coding RNA 622
chr1	120172411	120173342	932	*	MACS_peak_1504	130.39	Intron (uc001ehy.1/90874, intron 1 of 2)	1	120162000	120190390	28391	2	90874	uc001ehy.1	17048	ENSG00000143067	ZNF697	zinc finger protein 697
chr1	120173442	120175477	2036	*	MACS_peak_1505	171.97	Intron (uc001ehy.1/90874, intron 1 of 2)	1	120162000	120190390	28391	2	90874	uc001ehy.1	14913	ENSG00000143067	ZNF697	zinc finger protein 697
chr1	120178158	120180304	2147	*	MACS_peak_1506	111.06	Intron (uc001ehy.1/90874, intron 1 of 2)	1	120162000	120190390	28391	2	90874	uc001ehy.1	10086	ENSG00000143067	ZNF697	zinc finger protein 697
chr1	120180774	120181941	1168	*	MACS_peak_1507	69.17	Intron (uc001ehy.1/90874, intron 1 of 2)	1	120162000	120190390	28391	2	90874	uc001ehy.1	8449	ENSG00000143067	ZNF697	zinc finger protein 697
chr1	120188511	120191563	3053	*	MACS_peak_1508	54.21	Promoter (<=1kb)	1	120162000	120190390	28391	2	90874	uc001ehy.1	0	ENSG00000143067	ZNF697	zinc finger protein 697
chr1	120273983	120276106	2124	*	MACS_peak_1510	267.03	Intron (uc009whl.3/26227, intron 6 of 6)	1	120262250	120286849	24600	1	26227	uc001eib.3	11733	ENSG00000092621	PHGDH	phosphoglycerate dehydrogenase
chr1	120312543	120314260	1718	*	MACS_peak_1511	57.03	Promoter (<=1kb)	1	120290619	120311555	20937	2	3158	uc010oxj.2	-988	ENSG00000134240	HMGCS2	3-hydroxy-3-methylglutaryl-CoA synthase 2
chr1	120437329	120438352	1024	*	MACS_peak_1513	100.09	Promoter (<=1kb)	1	120436156	120439147	2992	2	11085	uc001eij.3	795	ENSG00000134249	ADAM30	ADAM metallopeptidase domain 30
chr1	144009485	144011086	1602	*	MACS_peak_1514	434.3	Intron (uc010oxm.1/uc010oxm.1, intron 1 of 3)	1	143896452	143913143	16692	2	728833	uc010evy.1	-96342	ENSG00000215784	FAM72D	family with sequence similarity 72 member D
chr1	144529774	144534668	4895	*	MACS_peak_1515	53.73	Intron (uc010oxn.2/728841, intron 15 of 18)	1	144480746	144521969	41224	2	728875	uc001ekz.4	-7805	NA	NA	NA
chr1	144865082	144868469	3388	*	MACS_peak_1516	104.66	Promoter (<=1kb)	1	144862708	144868172	5465	2	9659	uc001ema.3	0	ENSG00000178104	PDE4DIP	phosphodiesterase 4D interacting protein
chr1	144930364	144933479	3116	*	MACS_peak_1517	187.23	Promoter (<=1kb)	1	144890591	144932032	41442	2	9659	uc001emb.1	0	ENSG00000178104	PDE4DIP	phosphodiesterase 4D interacting protein
chr1	145044216	145047502	3287	*	MACS_peak_1518	50.03	Intron (uc021ott.2/100288142, intron 53 of 131)	1	144851424	145039992	188569	2	9659	uc001elx.4	-4224	ENSG00000178104	PDE4DIP	phosphodiesterase 4D interacting protein
chr1	145114161	145114935	775	*	MACS_peak_1519	135.02	Intron (uc021ott.2/100288142, intron 53 of 131)	1	145096407	145116997	20591	1	9554	uc031poa.1	17754	ENSG00000265808	SEC22B	SEC22 homolog B, vesicle trafficking protein (gene/pseudogene)
chr1	145208809	145210372	1564	*	MACS_peak_1520	75.46	Promoter (<=1kb)	1	145209111	145304652	95542	1	100132406	uc021ouk.1	0	ENSG00000271425	NBPF10	NBPF member 10
chr1	145420857	145421513	657	*	MACS_peak_1521	423.8	Intron (uc021ott.2/100288142, intron 99 of 131)	1	145413191	145417545	4355	1	148738	uc001enl.2	7666	ENSG00000168509	HFE2	hemochromatosis type 2 (juvenile)
chr1	145542170	145543379	1210	*	MACS_peak_1522	66.43	3' UTR	1	145549209	145563099	13891	1	148741	uc010oyx.1	-5830	ENSG00000198483	ANKRD35	ankyrin repeat domain 35
chr1	145610550	145611592	1043	*	MACS_peak_1523	360.22	Promoter (<=1kb)	1	145592605	145610627	18023	2	10623	uc001eog.3	0	ENSG00000186141	POLR3C	RNA polymerase III subunit C
chr1	147051131	147052027	897	*	MACS_peak_1525	181.99	Intron (uc001epq.3/607, intron 1 of 9)	1	147083377	147096757	13381	1	607	uc010ozr.1	-31350	ENSG00000116128	BCL9	B-cell CLL/lymphoma 9
chr1	147061972	147062607	636	*	MACS_peak_1526	55.22	Intron (uc001epq.3/607, intron 1 of 9)	1	147083377	147096757	13381	1	607	uc010ozr.1	-20770	ENSG00000116128	BCL9	B-cell CLL/lymphoma 9
chr1	148556106	148557018	913	*	MACS_peak_1528	126.97	Promoter (1-2kb)	1	148558188	148596267	38080	1	284565	uc001esb.2	-1170	ENSG00000266338	NBPF15	NBPF member 15
chr1	149949219	149949671	453	*	MACS_peak_1529	104.25	5' UTR	1	149932867	149943179	10313	2	56957	uc001eto.3	-6040	ENSG00000264522	OTUD7B	OTU deubiquitinase 7B
chr1	149978612	149979648	1037	*	MACS_peak_1530	85.53	Intron (uc001etn.3/56957, intron 1 of 11)	1	149912232	149982686	70455	2	56957	uc001etn.3	3038	ENSG00000264522	OTUD7B	OTU deubiquitinase 7B
chr1	149982070	149983287	1218	*	MACS_peak_1531	71.86	Promoter (<=1kb)	1	149912232	149982686	70455	2	56957	uc001etn.3	0	ENSG00000264522	OTUD7B	OTU deubiquitinase 7B
chr1	150228601	150230901	2301	*	MACS_peak_1533	122.24	Promoter (<=1kb)	1	150230218	150237480	7263	1	23632	uc001etx.3	0	ENSG00000118298	CA14	carbonic anhydrase 14
chr1	150231367	150232994	1628	*	MACS_peak_1534	109.34	Promoter (1-2kb)	1	150230218	150237480	7263	1	23632	uc001etx.3	1149	ENSG00000118298	CA14	carbonic anhydrase 14
chr1	150240210	150241819	1610	*	MACS_peak_1535	70.14	Promoter (<=1kb)	1	150237799	150241609	3811	2	51107	uc001ety.2	0	ENSG00000117362	APH1A	aph-1 homolog A, gamma-secretase subunit
chr1	150253663	150255463	1801	*	MACS_peak_1536	95.84	Promoter (<=1kb)	1	150254953	150259501	4549	1	148523	uc001euh.3	0	ENSG00000159208	CIART	circadian associated repressor of transcription
chr1	150293721	150294329	609	*	MACS_peak_1537	170.61	Promoter (<=1kb)	1	150293928	150301344	7417	1	9129	uc009wlo.3	0	ENSG00000117360	PRPF3	pre-mRNA processing factor 3
chr1	150336064	150337429	1366	*	MACS_peak_1538	65.45	Promoter (<=1kb)	1	150336990	150446032	109043	1	23248	uc010pcc.1	0	ENSG00000163125	RPRD2	regulation of nuclear pre-mRNA domain containing 2
chr1	150359663	150360368	706	*	MACS_peak_1539	63.34	Intron (uc010pcc.1/23248, intron 1 of 10)	1	150336990	150449041	112052	1	23248	uc009wlr.3	22673	ENSG00000163125	RPRD2	regulation of nuclear pre-mRNA domain containing 2
chr1	150951248	150952299	1052	*	MACS_peak_1542	53.02	Promoter (2-3kb)	1	150954499	150968114	13616	1	8416	uc001ewa.2	-2200	ENSG00000143412	ANXA9	annexin A9
chr1	150967443	150968309	867	*	MACS_peak_1543	89.33	3' UTR	1	150969301	150979273	9973	2	55793	uc001ewc.3	10964	ENSG00000143409	MINDY1	MINDY lysine 48 deubiquitinase 1
chr1	151170481	151171394	914	*	MACS_peak_1544	744.59	Promoter (<=1kb)	1	151171021	151219441	48421	1	8394	uc021oyo.1	0	ENSG00000143398	PIP5K1A	phosphatidylinositol-4-phosphate 5-kinase type 1 alpha
chr1	151264591	151266023	1433	*	MACS_peak_1545	76.3	3' UTR	1	151258751	151264381	5631	1	57592	uc009wmp.3	5840	ENSG00000143373	ZNF687	zinc finger protein 687
chr1	151377092	151379291	2200	*	MACS_peak_1546	96.32	3' UTR	1	151372041	151374412	2372	1	5692	uc001eyc.1	5051	ENSG00000159377	PSMB4	proteasome subunit beta 4
chr1	151402755	151403632	878	*	MACS_peak_1547	53.21	5' UTR	1	151375200	151414681	39482	2	23126	uc021oyq.1	11049	ENSG00000143442	POGZ	pogo transposable element derived with ZNF domain
chr1	151483206	151484753	1548	*	MACS_peak_1548	96.24	Promoter (<=1kb)	1	151483862	151511167	27306	1	57530	uc009wmw.3	0	ENSG00000143375	CGN	cingulin
chr1	151583688	151585985	2298	*	MACS_peak_1549	60.25	Promoter (<=1kb)	1	151584541	151671559	87019	1	81609	uc031ppc.1	0	ENSG00000143376	SNX27	sorting nexin family member 27
chr1	151678185	151680858	2674	*	MACS_peak_1550	59.25	Promoter (<=1kb)	1	151672534	151680411	7878	2	11189	uc010pdh.2	0	ENSG00000159409	CELF3	CUGBP Elav-like family member 3
chr1	151773031	151773913	883	*	MACS_peak_1551	94.09	3' UTR	1	151772765	151777882	5118	2	339398	uc001ezf.1	3969	ENSG00000213171	LINGO4	leucine rich repeat and Ig domain containing 4
chr1	151811652	151813131	1480	*	MACS_peak_1552	88.3	Promoter (<=1kb)	1	151810339	151813033	2695	2	100191040	uc010pdq.1	0	ENSG00000225556	C2CD4D	C2 calcium dependent domain containing 4D
chr1	151881503	151882878	1376	*	MACS_peak_1553	155.59	Promoter (<=1kb)	1	151843343	151882361	39019	2	117145	uc001ezj.2	0	ENSG00000159445	THEM4	thioesterase superfamily member 4
chr1	151974408	151975224	817	*	MACS_peak_1555	117.5	Intron (uc001ezm.1/uc001ezm.1, intron 2 of 12)	1	151955386	151966714	11329	2	6281	uc001ezl.3	-7694	ENSG00000197747	S100A10	S100 calcium binding protein A10
chr1	151986544	151987721	1178	*	MACS_peak_1556	54.57	Exon (uc001ezm.1/uc001ezm.1, exon 4 of 13)	1	151955386	151966714	11329	2	6281	uc001ezl.3	-19830	ENSG00000197747	S100A10	S100 calcium binding protein A10
chr1	152275260	152275973	714	*	MACS_peak_1559	53.85	Exon (uc001ezu.1/2312, exon 3 of 3)	1	152274651	152297679	23029	2	2312	uc001ezu.1	21706	ENSG00000143631	FLG	filaggrin
chr1	152797195	152797827	633	*	MACS_peak_1562	159.75	Promoter (2-3kb)	1	152799949	152800573	625	1	353131	uc010pdw.2	-2122	ENSG00000186844	LCE1A	late cornified envelope 1A
chr1	152798741	152799532	792	*	MACS_peak_1563	69.48	Promoter (<=1kb)	1	152799949	152800573	625	1	353131	uc010pdw.2	-417	ENSG00000186844	LCE1A	late cornified envelope 1A
chr1	153507325	153509219	1895	*	MACS_peak_1567	67.87	Promoter (<=1kb)	1	153507076	153508717	1642	2	6277	uc001fbw.1	0	ENSG00000197956	S100A6	S100 calcium binding protein A6
chr1	153510438	153511254	817	*	MACS_peak_1568	306.83	Promoter (1-2kb)	1	153507076	153508717	1642	2	6277	uc001fbw.1	-1721	ENSG00000197956	S100A6	S100 calcium binding protein A6
chr1	153609511	153610268	758	*	MACS_peak_1569	59.87	Promoter (<=1kb)	1	153609048	153618782	9735	1	26097	uc001fco.2	463	ENSG00000160679	CHTOP	chromatin target of PRMT1
chr1	153853284	153853945	662	*	MACS_peak_1570	65.78	Intron (uc001fdb.4/57459, intron 1 of 10)	1	153777203	153895451	118249	2	57459	uc001fdb.4	41506	ENSG00000143614	GATAD2B	GATA zinc finger domain containing 2B
chr1	153917507	153919680	2174	*	MACS_peak_1571	189.1	Promoter (<=1kb)	1	153901977	153919154	17178	2	9909	uc001fdd.1	0	ENSG00000198837	DENND4B	DENN domain containing 4B
chr1	153939362	153940737	1376	*	MACS_peak_1572	236.37	Promoter (<=1kb)	1	153940315	153941641	1327	1	148327	uc031ppj.1	0	ENSG00000143578	CREB3L4	cAMP responsive element binding protein 3 like 4
chr1	154053630	154054554	925	*	MACS_peak_1573	77.32	Intron (uc009woq.3/91181, intron 10 of 27)	1	153965168	154108448	143281	2	91181	uc009woq.3	53894	ENSG00000143552	NUP210L	nucleoporin 210 like
chr1	154143081	154144528	1448	*	MACS_peak_1574	119.35	Promoter (<=1kb)	1	154127780	154145153	17374	2	7170	uc001fdx.1	625	ENSG00000143549	TPM3	tropomyosin 3
chr1	154192608	154193884	1277	*	MACS_peak_1575	830.88	Promoter (<=1kb)	1	154179183	154193273	14091	2	25912	uc001feg.2	0	ENSG00000143612	C1orf43	chromosome 1 open reading frame 43
chr1	154376784	154379283	2500	*	MACS_peak_1576	104.9	Promoter (<=1kb)	1	154377669	154410561	32893	1	3570	uc021paf.1	0	ENSG00000160712	IL6R	interleukin 6 receptor
chr1	154392430	154393767	1338	*	MACS_peak_1577	133.31	Intron (uc021paf.1/3570, intron 1 of 6)	1	154377669	154441926	64258	1	3570	uc001ffa.2	14761	ENSG00000160712	IL6R	interleukin 6 receptor
chr1	154400911	154402289	1379	*	MACS_peak_1578	115.48	Exon (uc021paf.1/3570, exon 2 of 7)	1	154377669	154441926	64258	1	3570	uc001ffa.2	23242	ENSG00000160712	IL6R	interleukin 6 receptor
chr1	154404774	154406469	1696	*	MACS_peak_1579	143.84	Intron (uc021paf.1/3570, intron 3 of 6)	1	154377669	154441926	64258	1	3570	uc001ffa.2	27105	ENSG00000160712	IL6R	interleukin 6 receptor
chr1	154433051	154433978	928	*	MACS_peak_1580	92.85	Intron (uc001fez.2/3570, intron 9 of 9)	1	154451954	154474526	22573	2	126669	uc001ffb.3	40548	ENSG00000169291	SHE	Src homology 2 domain containing E
chr1	154497060	154497787	728	*	MACS_peak_1581	99.79	Intron (uc001ffd.3/126668, intron 6 of 12)	1	154493799	154520623	26825	1	126668	uc001ffe.3	3261	ENSG00000163239	TDRD10	tudor domain containing 10
chr1	154512242	154513605	1364	*	MACS_peak_1582	173.98	Intron (uc001ffd.3/126668, intron 6 of 12)	1	154521051	154531120	10070	2	55585	uc001fff.1	17515	ENSG00000160714	UBE2Q1	ubiquitin conjugating enzyme E2 Q1
chr1	154530818	154532488	1671	*	MACS_peak_1583	1761.61	Promoter (<=1kb)	1	154521051	154531120	10070	2	55585	uc001fff.1	0	ENSG00000160714	UBE2Q1	ubiquitin conjugating enzyme E2 Q1
chr1	154540401	154543199	2799	*	MACS_peak_1584	61.61	Promoter (<=1kb)	1	154540257	154552353	12097	1	1141	uc001ffg.3	144	ENSG00000160716	CHRNB2	cholinergic receptor nicotinic beta 2 subunit
chr1	154546993	154549117	2125	*	MACS_peak_1585	263.51	3' UTR	1	154540257	154552353	12097	1	1141	uc001ffg.3	6736	ENSG00000160716	CHRNB2	cholinergic receptor nicotinic beta 2 subunit
chr1	154599423	154600793	1371	*	MACS_peak_1586	89.02	Promoter (<=1kb)	1	154554534	154600456	45923	2	103	uc001ffk.3	0	ENSG00000160710	ADAR	adenosine deaminase, RNA specific
chr1	154739770	154740697	928	*	MACS_peak_1587	171.55	Intron (uc001ffo.3/3782, intron 3 of 7)	1	154669942	154832338	162397	2	3782	uc001ffo.3	91641	ENSG00000143603	KCNN3	potassium calcium-activated channel subfamily N member 3
chr1	154762525	154763564	1040	*	MACS_peak_1588	202.92	Intron (uc001ffo.3/3782, intron 2 of 7)	1	154669942	154832338	162397	2	3782	uc001ffo.3	68774	ENSG00000143603	KCNN3	potassium calcium-activated channel subfamily N member 3
chr1	154908473	154910068	1596	*	MACS_peak_1589	823.03	Promoter (<=1kb)	1	154897208	154909484	12277	2	10654	uc001ffq.3	0	ENSG00000163344	PMVK	phosphomevalonate kinase
chr1	154928242	154929067	826	*	MACS_peak_1590	82.51	Promoter (<=1kb)	1	154916559	154928567	12009	2	57326	uc001ffr.3	0	ENSG00000163346	PBXIP1	PBX homeobox interacting protein 1
chr1	154977649	154979168	1520	*	MACS_peak_1591	60.54	Promoter (2-3kb)	1	154975106	154991001	15896	1	51043	uc031ppr.1	2543	ENSG00000160685	ZBTB7B	zinc finger and BTB domain containing 7B
chr1	155051990	155054061	2072	*	MACS_peak_1592	427.26	Promoter (<=1kb)	1	155051348	155060014	8667	1	1944	uc010pex.2	642	ENSG00000143590	EFNA3	ephrin A3
chr1	155054958	155059406	4449	*	MACS_peak_1593	75.79	3' UTR	1	155051348	155060014	8667	1	1944	uc010pex.2	3610	ENSG00000143590	EFNA3	ephrin A3
chr1	155163035	155165050	2016	*	MACS_peak_1594	90.16	Promoter (<=1kb)	1	155164968	155165063	96	1	693235	uc021pas.1	0	ENSG00000284586	MIR92B	microRNA 92b
chr1	155188539	155190014	1476	*	MACS_peak_1595	430.79	Promoter (<=1kb)	1	155183616	155188809	5194	2	2630	uc001fjd.3	0	ENSG00000160766	GBAP1	glucosylceramidase beta pseudogene 1
chr1	155210602	155212050	1449	*	MACS_peak_1596	283.39	Promoter (<=1kb)	1	155204239	155211069	6831	2	2629	uc001fjh.3	0	ENSG00000177628	GBA	glucosylceramidase beta
chr1	155213293	155215030	1738	*	MACS_peak_1597	77.1	Promoter (<=1kb)	1	155204239	155214653	10415	2	2629	uc001fjk.3	0	ENSG00000177628	GBA	glucosylceramidase beta
chr1	155231210	155232646	1437	*	MACS_peak_1598	142.28	Promoter (<=1kb)	1	155225770	155232176	6407	2	10067	uc001fjs.3	0	ENSG00000116521	SCAMP3	secretory carrier membrane protein 3
chr1	155531932	155533421	1490	*	MACS_peak_1599	66.36	Promoter (<=1kb)	1	155305052	155532324	227273	2	55870	uc001fkt.3	0	ENSG00000116539	ASH1L	ASH1 like histone lysine methyltransferase
chr1	155579183	155580095	913	*	MACS_peak_1600	118.04	Promoter (<=1kb)	1	155579961	155584758	4798	1	55154	uc001fkw.4	0	ENSG00000125459	MSTO1	misato 1, mitochondrial distribution and morphology regulator
chr1	155657867	155659130	1264	*	MACS_peak_1601	57.39	Promoter (<=1kb)	1	155629233	155658447	29215	2	55249	uc001flh.3	0	ENSG00000163374	YY1AP1	YY1 associated protein 1
chr1	155682616	155683438	823	*	MACS_peak_1602	52.67	Intron (uc001flr.3/7818, intron 2 of 12)	1	155658885	155708800	49916	1	7818	uc001flq.3	23731	ENSG00000132676	DAP3	death associated protein 3
chr1	155688402	155689168	767	*	MACS_peak_1603	55.92	Intron (uc001flr.3/7818, intron 3 of 12)	1	155715559	155717687	2129	1	100129405	uc010pgn.2	-26391	NA	MSTO2P	misato family member 2, pseudogene
chr1	155880340	155881553	1214	*	MACS_peak_1604	58.3	Promoter (<=1kb)	1	155867599	155880706	13108	2	6016	uc031pqc.1	0	ENSG00000143622	RIT1	Ras like without CAAX 1
chr1	155890631	155891478	848	*	MACS_peak_1605	55.43	Promoter (<=1kb)	1	155889700	155889833	134	2	677823	uc001fmk.1	-798	ENSG00000207475	SNORA80E	small nucleolar RNA, H/ACA box 80E
chr1	156019704	156021341	1638	*	MACS_peak_1606	61.66	Promoter (2-3kb)	1	156005092	156023516	18425	2	56893	uc001fna.3	2175	ENSG00000160803	UBQLN4	ubiquilin 4
chr1	156092462	156095699	3238	*	MACS_peak_1607	69.89	Promoter (<=1kb)	1	156095951	156108548	12598	1	4000	uc001fnj.3	-252	ENSG00000160789	LMNA	lamin A/C
chr1	156095806	156097552	1747	*	MACS_peak_1608	58.65	Promoter (<=1kb)	1	156095951	156108548	12598	1	4000	uc001fnj.3	0	ENSG00000160789	LMNA	lamin A/C
chr1	156099495	156100894	1400	*	MACS_peak_1609	195.36	5' UTR	1	156096346	156109880	13535	1	4000	uc001fnk.3	3149	ENSG00000160789	LMNA	lamin A/C
chr1	156163308	156165088	1781	*	MACS_peak_1611	215.38	Promoter (<=1kb)	1	156163730	156182587	18858	1	9673	uc001fnp.3	0	ENSG00000160785	SLC25A44	solute carrier family 25 member 44
chr1	156260745	156262225	1481	*	MACS_peak_1612	72.94	3' UTR	1	156262478	156265480	3003	2	112770	uc001foh.4	3255	ENSG00000198715	GLMP	glycosylated lysosomal membrane protein
chr1	156264760	156265882	1123	*	MACS_peak_1613	321.54	Promoter (<=1kb)	1	156262478	156265480	3003	2	112770	uc001foh.4	0	ENSG00000198715	GLMP	glycosylated lysosomal membrane protein
chr1	156341586	156342539	954	*	MACS_peak_1614	321.97	Promoter (2-3kb)	1	156338980	156355013	16034	1	57127	uc031pqo.1	2606	ENSG00000132677	RHBG	Rh family B glycoprotein (gene/pseudogene)
chr1	156430552	156432506	1955	*	MACS_peak_1616	76.79	Downstream (1-2kb)	1	156433513	156460391	26879	2	4209	uc001fpb.4	27885	ENSG00000116604	MEF2D	myocyte enhancer factor 2D
chr1	156470099	156471457	1359	*	MACS_peak_1617	86.09	Promoter (<=1kb)	1	156433513	156470634	37122	2	4209	uc001fpc.4	0	ENSG00000116604	MEF2D	myocyte enhancer factor 2D
chr1	156493979	156495029	1051	*	MACS_peak_1619	78.16	Downstream (<1kb)	1	156433520	156470634	37115	2	4209	uc001fpe.2	-23345	ENSG00000116604	MEF2D	myocyte enhancer factor 2D
chr1	156502469	156505587	3119	*	MACS_peak_1620	55.43	Exon (uc001fpf.3/128239, exon 28 of 38)	1	156433520	156470634	37115	2	4209	uc001fpe.2	-31835	ENSG00000116604	MEF2D	myocyte enhancer factor 2D
chr1	156560976	156563212	2237	*	MACS_peak_1621	60.61	Promoter (<=1kb)	1	156561558	156562558	1001	1	128240	uc031pqp.1	0	ENSG00000163382	NAXE	NAD(P)HX epimerase
chr1	156607664	156609066	1403	*	MACS_peak_1623	135.75	Promoter (2-3kb)	1	156611740	156623264	11525	1	63827	uc001fpo.3	-2674	ENSG00000132692	BCAN	brevican
chr1	156611279	156612614	1336	*	MACS_peak_1624	72.04	Promoter (<=1kb)	1	156611740	156623264	11525	1	63827	uc001fpo.3	0	ENSG00000132692	BCAN	brevican
chr1	156627719	156632418	4700	*	MACS_peak_1625	73.83	3' UTR	1	156638556	156647189	8634	2	10763	uc001fpq.3	14771	ENSG00000132688	NES	nestin
chr1	156667097	156668412	1316	*	MACS_peak_1626	92.8	Downstream (<1kb)	1	156669400	156675459	6060	2	1382	uc001fpr.3	7047	ENSG00000143320	CRABP2	cellular retinoic acid binding protein 2
chr1	156870086	156873954	3869	*	MACS_peak_1627	64.88	Promoter (2-3kb)	1	156876068	156878828	2761	1	375033	uc009wsl.1	-2114	ENSG00000187800	PEAR1	platelet endothelial aggregation receptor 1
chr1	156933157	156934003	847	*	MACS_peak_1628	127.59	Exon (uc001fqn.3/9826, exon 12 of 41)	1	156918111	156926356	8246	2	9826	uc001fqp.1	-6801	ENSG00000132694	ARHGEF11	Rho guanine nucleotide exchange factor 11
chr1	157060222	157062239	2018	*	MACS_peak_1629	142.05	3' UTR	1	157061835	157069600	7766	2	440695	uc001fqq.2	7361	ENSG00000253831	ETV3L	ETS variant 3 like
chr1	158014762	158016157	1396	*	MACS_peak_1638	372.1	Intron (uc001frn.4/55243, intron 1 of 14)	1	158045903	158065844	19942	1	55243	uc009wsq.3	-29746	ENSG00000183853	KIRREL1	kirre like nephrin family adhesion molecule 1
chr1	158110252	158111320	1069	*	MACS_peak_1639	72.79	Promoter (<=1kb)	1	158101834	158110430	8597	2	646268	uc001frq.3	0	ENSG00000231666	LINC01704	long intergenic non-protein coding RNA 1704
chr1	158328027	158328898	872	*	MACS_peak_1641	81.36	Promoter (2-3kb)	1	158325617	158327343	1727	1	913	uc021pbm.1	2410	ENSG00000158488	CD1E	CD1e molecule
chr1	158432956	158433541	586	*	MACS_peak_1643	68.75	Promoter (1-2kb)	1	158435352	158436293	942	1	391109	uc010pij.2	-1811	ENSG00000173285	OR10K1	olfactory receptor family 10 subfamily K member 1
chr1	158965809	158967176	1368	*	MACS_peak_1648	92.75	Promoter (2-3kb)	1	158969758	158988441	18684	1	3428	uc001ftf.1	-2582	ENSG00000163565	IFI16	interferon gamma inducible protein 16
chr1	158985060	158985927	868	*	MACS_peak_1649	151.62	Promoter (<=1kb)	1	158984451	159024945	40495	1	3428	uc010pit.2	609	ENSG00000163565	IFI16	interferon gamma inducible protein 16
chr1	159750201	159751484	1284	*	MACS_peak_1655	78.14	Promoter (<=1kb)	1	159750759	159752333	1575	1	54935	uc001ftz.1	0	ENSG00000158716	DUSP23	dual specificity phosphatase 23
chr1	159774475	159775664	1190	*	MACS_peak_1656	109.72	Promoter (2-3kb)	1	159772210	159786047	13838	1	343413	uc009wta.3	2265	ENSG00000181036	FCRL6	Fc receptor like 6
chr1	159779227	159780407	1181	*	MACS_peak_1657	291.54	Exon (uc001fuc.2/343413, exon 6 of 11)	1	159772210	159786047	13838	1	343413	uc009wta.3	7017	ENSG00000181036	FCRL6	Fc receptor like 6
chr1	159893277	159896187	2911	*	MACS_peak_1658	127.17	Promoter (<=1kb)	1	159887897	159893507	5611	2	8407	uc031pqt.1	0	ENSG00000158710	TAGLN2	transgelin 2
chr1	159940429	159941480	1052	*	MACS_peak_1659	60.51	Intron (uc001fuu.3/100505633, intron 1 of 2)	1	159931014	159948876	17863	1	100505633	uc001fuu.3	9415	ENSG00000224259	LINC01133	long intergenic non-protein coding RNA 1133
chr1	160015134	160016037	904	*	MACS_peak_1660	542.85	Intron (uc001fuw.2/3766, intron 1 of 1)	1	159997462	160001783	4322	2	93183	uc001fuv.1	-13351	ENSG00000143315	PIGM	phosphatidylinositol glycan anchor biosynthesis class M
chr1	160030900	160032541	1642	*	MACS_peak_1661	127.69	Intron (uc001fuw.2/3766, intron 1 of 1)	1	160007257	160040051	32795	2	3766	uc001fuw.2	7510	ENSG00000177807	KCNJ10	potassium voltage-gated channel subfamily J member 10
chr1	160065048	160068300	3253	*	MACS_peak_1662	51.69	Promoter (<=1kb)	1	160061136	160068307	7172	2	93185	uc001fva.3	7	ENSG00000162729	IGSF8	immunoglobulin superfamily member 8
chr1	160100174	160101397	1224	*	MACS_peak_1663	104.96	Promoter (1-2kb)	1	160098186	160100387	2202	1	477	uc009wtg.1	1988	ENSG00000018625	ATP1A2	ATPase Na+/K+ transporting subunit alpha 2
chr1	160128153	160128985	833	*	MACS_peak_1664	98.79	Exon (uc001fve.4/480, exon 5 of 22)	1	160121352	160156767	35416	1	480	uc001fvf.4	6801	ENSG00000132681	ATP1A4	ATPase Na+/K+ transporting subunit alpha 4
chr1	160146276	160147526	1251	*	MACS_peak_1665	55.84	Promoter (<=1kb)	1	160147201	160156767	9567	1	480	uc001fvh.3	0	ENSG00000132681	ATP1A4	ATPase Na+/K+ transporting subunit alpha 4
chr1	160395370	160396316	947	*	MACS_peak_1667	108.9	3' UTR	1	160370364	160398468	28105	1	57216	uc001fwc.2	25006	ENSG00000162738	VANGL2	VANGL planar cell polarity protein 2
chr1	160513656	160514180	525	*	MACS_peak_1668	90.81	3' UTR	1	160460431	160493052	32622	2	114836	uc009wtm.2	-20604	ENSG00000162739	SLAMF6	SLAM family member 6
chr1	160712464	160713784	1321	*	MACS_peak_1669	282.39	Intron (uc001fwq.3/57823, intron 1 of 6)	1	160709077	160724601	15525	1	57823	uc010pjr.2	3387	ENSG00000026751	SLAMF7	SLAM family member 7
chr1	160718099	160719000	902	*	MACS_peak_1670	56.47	Exon (uc001fwq.3/57823, exon 2 of 7)	1	160709077	160724601	15525	1	57823	uc010pjr.2	9022	ENSG00000026751	SLAMF7	SLAM family member 7
chr1	160785978	160786874	897	*	MACS_peak_1671	77.87	Promoter (1-2kb)	1	160784210	160798045	13836	1	4063	uc001fwz.3	1768	ENSG00000122224	LY9	lymphocyte antigen 9
chr1	160814076	160814771	696	*	MACS_peak_1672	68.41	Intron (uc001fxa.3/51744, intron 1 of 8)	1	160799950	160832692	32743	2	51744	uc001fxa.3	17921	ENSG00000122223	CD244	CD244 molecule
chr1	160971967	160972445	479	*	MACS_peak_1673	76.95	Intron (uc010pjv.2/50848, intron 1 of 8)	1	160965001	160990902	25902	2	50848	uc010pjv.2	18457	ENSG00000158769	F11R	F11 receptor
chr1	161086849	161088244	1396	*	MACS_peak_1674	143.19	Promoter (<=1kb)	1	161087862	161090984	3123	1	4817	uc001fxv.2	0	ENSG00000158793	NIT1	nitrilase 1
chr1	161450108	161452188	2081	*	MACS_peak_1675	129.76	Exon (uc021pcy.1/uc021pcy.1, exon 1 of 1)	1	161475205	161489360	14156	1	2212	uc001gam.3	-23017	ENSG00000143226	FCGR2A	Fc fragment of IgG receptor IIa
chr1	161476491	161477362	872	*	MACS_peak_1676	110.72	Promoter (1-2kb)	1	161475205	161489360	14156	1	2212	uc021pda.2	1286	ENSG00000143226	FCGR2A	Fc fragment of IgG receptor IIa
chr1	161646024	161647423	1400	*	MACS_peak_1677	98.09	3' UTR	1	161653495	161655042	1548	2	641311	uc001gbc.3	7619	ENSG00000213075	RPL31P11	ribosomal protein L31 pseudogene 11
chr1	161673694	161674293	600	*	MACS_peak_1678	67.32	Promoter (2-3kb)	1	161676762	161684142	7381	1	84824	uc001gbd.3	-2469	ENSG00000132185	FCRLA	Fc receptor like A
chr1	161695272	161697754	2483	*	MACS_peak_1679	64.05	Promoter (<=1kb)	1	161695702	161697933	2232	1	127943	uc001gbn.4	0	ENSG00000162746	FCRLB	Fc receptor like B
chr1	161744698	161745426	729	*	MACS_peak_1680	157.38	Intron (uc001gbq.2/22926, intron 1 of 13)	1	161736034	161933860	197827	1	22926	uc001gbs.3	8664	ENSG00000118217	ATF6	activating transcription factor 6
chr1	161909160	161910033	874	*	MACS_peak_1681	83.19	Intron (uc001gbs.3/22926, intron 15 of 15)	1	161952982	161955022	2041	2	25903	uc001gbt.3	44989	ENSG00000162745	OLFML2B	olfactomedin like 2B
chr1	161962888	161964596	1709	*	MACS_peak_1682	98.45	Intron (uc001gbu.3/25903, intron 6 of 7)	1	161952982	161955022	2041	2	25903	uc001gbt.3	-7866	ENSG00000162745	OLFML2B	olfactomedin like 2B
chr1	161977819	161981344	3526	*	MACS_peak_1683	69.77	Intron (uc001gbu.3/25903, intron 3 of 7)	1	161952982	161993644	40663	2	25903	uc001gbu.3	12300	ENSG00000162745	OLFML2B	olfactomedin like 2B
chr1	162062786	162063589	804	*	MACS_peak_1684	120.79	Intron (uc010pkr.1/9722, intron 1 of 7)	1	162039581	162339813	300233	1	9722	uc010pks.1	23205	ENSG00000198929	NOS1AP	nitric oxide synthase 1 adaptor protein
chr1	162679430	162680388	959	*	MACS_peak_1688	188.09	Intron (uc001gcf.3/4921, intron 3 of 18)	1	162602228	162750247	148020	1	4921	uc001gcg.3	77202	ENSG00000162733	DDR2	discoidin domain receptor tyrosine kinase 2
chr1	162698085	162699008	924	*	MACS_peak_1689	153.06	Intron (uc001gcf.3/4921, intron 4 of 18)	1	162760496	162782608	22113	1	51478	uc001gci.3	-61488	ENSG00000132196	HSD17B7	hydroxysteroid 17-beta dehydrogenase 7
chr1	164768763	164769321	559	*	MACS_peak_1695	95.24	Exon (uc001gcs.3/5087, exon 4 of 8)	1	164738353	164743878	5526	2	100505795	uc021pdx.1	-24885	ENSG00000233693	LOC100505795	uncharacterized LOC100505795
chr1	164810919	164811905	987	*	MACS_peak_1696	58.68	Intron (uc001gcs.3/5087, intron 7 of 7)	1	164738353	164743878	5526	2	100505795	uc021pdx.1	-67041	ENSG00000233693	LOC100505795	uncharacterized LOC100505795
chr1	164829612	164830516	905	*	MACS_peak_1697	66.05	Intron (uc010pkw.1/5087, intron 7 of 7)	1	164738353	164743878	5526	2	100505795	uc021pdx.1	-85734	ENSG00000233693	LOC100505795	uncharacterized LOC100505795
chr1	165314471	165315422	952	*	MACS_peak_1701	218.55	Intron (uc001gcz.2/4009, intron 3 of 8)	1	165171104	165325478	154375	2	4009	uc001gcz.2	10056	ENSG00000162761	LMX1A	LIM homeobox transcription factor 1 alpha
chr1	165464085	165464811	727	*	MACS_peak_1703	66.16	Intron (uc001gdc.2/400794, intron 5 of 6)	1	165462198	165508849	46652	2	400794	uc010pkx.2	44038	ENSG00000237463	LOC400794	uncharacterized LOC400794
chr1	165796579	165798554	1976	*	MACS_peak_1704	77.97	Promoter (<=1kb)	1	165693528	165796992	103465	2	54499	uc001gdn.4	0	ENSG00000143183	TMCO1	transmembrane and coiled-coil domains 1
chr1	165820006	165820908	903	*	MACS_peak_1705	62.4	Intron (uc001gdp.3/7371, intron 1 of 6)	1	165693528	165796992	103465	2	54499	uc001gdn.4	-23014	ENSG00000143183	TMCO1	transmembrane and coiled-coil domains 1
chr1	166049464	166050433	970	*	MACS_peak_1706	201.24	Intron (uc010plc.2/149297, intron 1 of 2)	1	166123980	166124035	56	2	100126349	uc021peg.1	73602	ENSG00000215952	MIR921	microRNA 921
chr1	166808038	166808861	824	*	MACS_peak_1710	123.11	Promoter (<=1kb)	1	166808724	166819948	11225	1	57645	uc010ple.1	0	ENSG00000143157	POGK	pogo transposable element derived with KRAB domain
chr1	166844755	166846073	1319	*	MACS_peak_1711	962.08	Promoter (<=1kb)	1	166825749	166845654	19906	2	117143	uc001gdw.3	0	ENSG00000152382	TADA1	transcriptional adaptor 1
chr1	166926930	166927810	881	*	MACS_peak_1712	68	Exon (uc001gdx.2/387597, exon 2 of 10)	1	166882441	166944561	62121	2	387597	uc001gdx.2	16751	ENSG00000143195	ILDR2	immunoglobulin like domain containing receptor 2
chr1	167037717	167038566	850	*	MACS_peak_1713	85.6	Exon (uc001gea.1/10223, exon 3 of 7)	1	167022082	167059868	37787	2	10223	uc001gea.1	21302	ENSG00000143167	GPA33	glycoprotein A33
chr1	167082310	167083396	1087	*	MACS_peak_1714	121.09	Exon (uc001geb.1/92235, exon 2 of 5)	1	167064071	167098402	34332	1	92235	uc001geb.1	18239	ENSG00000198842	DUSP27	dual specificity phosphatase 27, atypical
chr1	167189004	167190038	1035	*	MACS_peak_1715	72.86	Promoter (<=1kb)	1	167190066	167365664	175599	1	5451	uc010plg.2	-28	ENSG00000143190	POU2F1	POU class 2 homeobox 1
chr1	167844359	167845223	865	*	MACS_peak_1717	50.41	Exon (uc001ger.3/55811, exon 13 of 33)	1	167778625	167883453	104829	2	55811	uc001ger.3	38230	ENSG00000143199	ADCY10	adenylate cyclase 10
chr1	168050570	168052107	1538	*	MACS_peak_1718	74.63	3' UTR	1	168059684	168074147	14464	2	23432	uc001gfe.1	22040	ENSG00000143147	GPR161	G protein-coupled receptor 161
chr1	168194446	168196103	1658	*	MACS_peak_1722	61.61	Promoter (<=1kb)	1	168195255	168212088	16834	1	375035	uc001gfi.4	0	ENSG00000213064	SFT2D2	SFT2 domain containing 2
chr1	169074282	169075584	1303	*	MACS_peak_1729	85.83	Promoter (<=1kb)	1	169075947	169101960	26014	1	481	uc001gfr.1	-363	ENSG00000143153	ATP1B1	ATPase Na+/K+ transporting subunit beta 1
chr1	169173225	169173725	501	*	MACS_peak_1730	52.78	Intron (uc001gft.3/29922, intron 10 of 11)	1	169075947	169101960	26014	1	481	uc001gfr.1	97278	ENSG00000143153	ATP1B1	ATPase Na+/K+ transporting subunit beta 1
chr1	169281227	169281818	592	*	MACS_peak_1731	233.04	Intron (uc001gft.3/29922, intron 3 of 11)	1	169101769	169337186	235418	2	29922	uc001gft.3	55368	ENSG00000143156	NME7	NME/NM23 family member 7
chr1	169452507	169453458	952	*	MACS_peak_1732	222.72	Promoter (1-2kb)	1	169433149	169455208	22060	2	10560	uc001gge.4	1750	ENSG00000117479	SLC19A2	solute carrier family 19 member 2
chr1	169454162	169455776	1615	*	MACS_peak_1733	114.21	Promoter (<=1kb)	1	169433149	169455208	22060	2	10560	uc001gge.4	0	ENSG00000117479	SLC19A2	solute carrier family 19 member 2
chr1	169751092	169752213	1122	*	MACS_peak_1734	58.9	Intron (uc001ggj.3/55732, intron 3 of 28)	1	169763871	169773526	9656	1	55732	uc001ggo.3	-11658	ENSG00000000460	C1orf112	chromosome 1 open reading frame 112
chr1	170691955	170692768	814	*	MACS_peak_1736	78.76	Intron (uc001ghe.3/5396, intron 2 of 4)	1	170633313	170708541	75229	1	5396	uc001ghf.3	58642	ENSG00000116132	PRRX1	paired related homeobox 1
chr1	170973859	170974606	748	*	MACS_peak_1737	54.68	Intron (uc010plz.2/80133, intron 15 of 21)	1	170904612	171033906	129295	1	80133	uc010plz.2	69247	ENSG00000117501	MROH9	maestro heat like repeat family member 9
chr1	171454186	171455390	1205	*	MACS_peak_1743	50.78	Promoter (<=1kb)	1	171454666	171484998	30333	1	23215	uc001ghq.1	0	ENSG00000117523	PRRC2C	proline rich coiled-coil 2C
chr1	171868047	171868734	688	*	MACS_peak_1745	112.95	Intron (uc001gid.5/26052, intron 1 of 14)	1	171810618	172381857	571240	1	26052	uc001gif.4	57429	ENSG00000197959	DNM3	dynamin 3
chr1	172066656	172067517	862	*	MACS_peak_1746	53.21	Intron (uc001gid.5/26052, intron 13 of 14)	1	172107948	172108028	81	1	100422882	uc021pew.1	-40431	ENSG00000283152	MIR3120	microRNA 3120
chr1	172107751	172108171	421	*	MACS_peak_1747	94.05	Promoter (<=1kb)	1	172107948	172108028	81	1	100422882	uc021pew.1	0	ENSG00000283152	MIR3120	microRNA 3120
chr1	172259736	172260595	860	*	MACS_peak_1748	69.73	Intron (uc009wwb.3/26052, intron 15 of 15)	1	172348158	172387567	39410	1	26052	uc001gih.1	-87563	ENSG00000197959	DNM3	dynamin 3
chr1	172543052	172543603	552	*	MACS_peak_1750	99.31	5' UTR	1	172502317	172580973	78657	1	51430	uc010pmo.3	40735	ENSG00000094975	SUCO	SUN domain containing ossification factor
chr1	173159338	173161431	2094	*	MACS_peak_1756	135.17	Intron (uc001giv.3/7292, intron 1 of 2)	1	173152870	173174697	21828	2	7292	uc001giv.3	13266	ENSG00000117586	TNFSF4	TNF superfamily member 4
chr1	173211331	173212082	752	*	MACS_peak_1757	76.48	Intron (uc001gix.1/100506023, intron 2 of 2)	1	173152870	173176471	23602	2	7292	uc001giw.3	-34860	ENSG00000117586	TNFSF4	TNF superfamily member 4
chr1	173382720	173383553	834	*	MACS_peak_1758	72.87	Intron (uc001gix.1/100506023, intron 2 of 2)	1	173204199	173446294	242096	2	100506023	uc001gix.1	62741	NA	LOC100506023	uncharacterized LOC100506023
chr1	173442360	173442991	632	*	MACS_peak_1759	72.9	Intron (uc001gix.1/100506023, intron 1 of 2)	1	173204199	173446294	242096	2	100506023	uc001gix.1	3303	NA	LOC100506023	uncharacterized LOC100506023
chr1	173445698	173447783	2086	*	MACS_peak_1760	195.3	Promoter (<=1kb)	1	173204199	173446294	242096	2	100506023	uc001gix.1	0	NA	LOC100506023	uncharacterized LOC100506023
chr1	173836368	173837918	1551	*	MACS_peak_1762	52.14	Promoter (<=1kb)	1	173833039	173837125	4087	2	60674	uc001gjj.3	0	ENSG00000234741	GAS5	growth arrest specific 5 (non-protein coding)
chr1	173921026	173921449	424	*	MACS_peak_1763	105.31	Exon (uc001gju.4/149041, exon 13 of 19)	1	173872942	173886516	13575	2	462	uc001gjt.3	-34510	ENSG00000117601	SERPINC1	serpin family C member 1
chr1	174367101	174367798	698	*	MACS_peak_1764	111.9	Intron (uc001gjw.3/9910, intron 13 of 13)	1	174417212	174418683	1472	1	9293	uc001gka.1	-49414	ENSG00000203737	GPR52	G protein-coupled receptor 52
chr1	174536799	174537674	876	*	MACS_peak_1765	74.98	Intron (uc001gjx.3/9910, intron 13 of 20)	1	174417212	174418683	1472	1	9293	uc001gka.1	119587	ENSG00000203737	GPR52	G protein-coupled receptor 52
chr1	174728600	174729345	746	*	MACS_peak_1766	55.56	Intron (uc001gjx.3/9910, intron 18 of 20)	1	174769035	174964445	195411	1	9910	uc001gke.4	-39690	ENSG00000152061	RABGAP1L	RAB GTPase activating protein 1 like
chr1	174768367	174769413	1047	*	MACS_peak_1767	75.65	Promoter (<=1kb)	1	174769035	174964445	195411	1	9910	uc001gke.4	0	ENSG00000152061	RABGAP1L	RAB GTPase activating protein 1 like
chr1	174968018	174969913	1896	*	MACS_peak_1768	138.75	Promoter (<=1kb)	1	174968571	174981163	12593	1	27101	uc001gki.1	0	ENSG00000116161	CACYBP	calcyclin binding protein
chr1	175424615	175425566	952	*	MACS_peak_1770	196.85	Intron (uc009wwu.1/7143, intron 2 of 22)	1	175291935	175375931	83997	2	7143	uc001gkp.1	-48684	ENSG00000116147	TNR	tenascin R
chr1	175575955	175576738	784	*	MACS_peak_1771	50.11	Intron (uc009wwu.1/7143, intron 1 of 22)	1	175291935	175712752	420818	2	7143	uc009wwu.1	136014	ENSG00000116147	TNR	tenascin R
chr1	176508286	176509199	914	*	MACS_peak_1776	69.08	Intron (uc001gky.1/60676, intron 1 of 4)	1	176432307	176811970	379664	1	60676	uc009www.3	75979	ENSG00000116183	PAPPA2	pappalysin 2
chr1	176509416	176510300	885	*	MACS_peak_1777	218.27	Intron (uc001gky.1/60676, intron 1 of 4)	1	176432307	176811970	379664	1	60676	uc009www.3	77109	ENSG00000116183	PAPPA2	pappalysin 2
chr1	176827368	176828079	712	*	MACS_peak_1778	124.04	Intron (uc001glb.1/460, intron 22 of 22)	1	176998499	176998581	83	2	574441	uc021pfc.1	170502	ENSG00000202609	MIR488	microRNA 488
chr1	176870355	176871083	729	*	MACS_peak_1779	86.35	Intron (uc001glb.1/460, intron 16 of 22)	1	176998499	176998581	83	2	574441	uc021pfc.1	127498	ENSG00000202609	MIR488	microRNA 488
chr1	176912220	176913018	799	*	MACS_peak_1780	102.1	Intron (uc001glb.1/460, intron 14 of 22)	1	176998499	176998581	83	2	574441	uc021pfc.1	85563	ENSG00000202609	MIR488	microRNA 488
chr1	177989857	177990751	895	*	MACS_peak_1782	166.55	Promoter (1-2kb)	1	177897489	177991803	94315	2	89866	uc001glj.1	1052	ENSG00000120341	SEC16B	SEC16 homolog B, endoplasmic reticulum export factor
chr1	178064237	178065061	825	*	MACS_peak_1784	126.67	Promoter (1-2kb)	1	178060643	178063128	2486	2	100302401	uc001glo.1	-1109	ENSG00000224687	RASAL2-AS1	RASAL2 antisense RNA 1
chr1	178722082	178722628	547	*	MACS_peak_1786	184.44	Intron (uc001gly.1/55103, intron 1 of 9)	1	178694300	178889237	194938	1	55103	uc010pnb.2	27782	ENSG00000116191	RALGPS2	Ral GEF with PH domain and SH3 binding motif 2
chr1	179783700	179785037	1338	*	MACS_peak_1788	128.9	3' UTR	1	179809102	179846941	37840	2	163590	uc001gnk.3	61904	ENSG00000169905	TOR1AIP2	torsin 1A interacting protein 2
chr1	179850840	179852606	1767	*	MACS_peak_1789	72.58	Promoter (<=1kb)	1	179851177	179889212	38036	1	26092	uc001gnp.2	0	ENSG00000143337	TOR1AIP1	torsin 1A interacting protein 1
chr1	180031549	180032075	527	*	MACS_peak_1791	63.55	Intron (uc001gnt.3/9857, intron 26 of 37)	1	180042954	180084015	41062	1	9857	uc001gnv.3	-10879	ENSG00000135837	CEP350	centrosomal protein 350
chr1	180231973	180232877	905	*	MACS_peak_1793	162.61	Intron (uc001goe.2/89884, intron 2 of 5)	1	180238798	180243816	5019	2	100527964	uc001gof.2	10939	ENSG00000230124	LHX4-AS1	LHX4 antisense RNA 1
chr1	180471066	180472201	1136	*	MACS_peak_1794	211.57	Promoter (<=1kb)	1	180257352	180472022	214671	2	84320	uc001gog.3	0	ENSG00000230124	ACBD6	acyl-CoA binding domain containing 6
chr1	180934789	180936741	1953	*	MACS_peak_1795	153.84	Intron (uc009wxo.1/uc009wxo.1, intron 1 of 1)	1	180897566	180919922	22357	1	57710	uc001gom.1	37223	ENSG00000135835	KIAA1614	KIAA1614
chr1	180963244	180963874	631	*	MACS_peak_1796	387.52	Intron (uc010pnr.2/10228, intron 1 of 5)	1	180942176	180992046	49871	2	10228	uc010pnr.2	28172	ENSG00000135823	STX6	syntaxin 6
chr1	180990948	180992500	1553	*	MACS_peak_1797	148.65	Promoter (<=1kb)	1	180942176	180992046	49871	2	10228	uc010pnr.2	0	ENSG00000135823	STX6	syntaxin 6
chr1	181507806	181509030	1225	*	MACS_peak_1800	77.4	Intron (uc001gow.3/777, intron 3 of 46)	1	181479613	181621230	141618	1	777	uc009wxr.3	28193	ENSG00000198216	CACNA1E	calcium voltage-gated channel subunit alpha1 E
chr1	181510794	181511642	849	*	MACS_peak_1801	79.91	Intron (uc001gow.3/777, intron 3 of 46)	1	181479613	181621230	141618	1	777	uc009wxr.3	31181	ENSG00000198216	CACNA1E	calcium voltage-gated channel subunit alpha1 E
chr1	181563497	181564967	1471	*	MACS_peak_1802	395.31	Intron (uc001gow.3/777, intron 6 of 46)	1	181479613	181621230	141618	1	777	uc009wxr.3	83884	ENSG00000198216	CACNA1E	calcium voltage-gated channel subunit alpha1 E
chr1	181580994	181581920	927	*	MACS_peak_1803	659.54	Intron (uc001gow.3/777, intron 6 of 46)	1	181479613	181621230	141618	1	777	uc009wxr.3	101381	ENSG00000198216	CACNA1E	calcium voltage-gated channel subunit alpha1 E
chr1	181649864	181650572	709	*	MACS_peak_1804	72.31	Intron (uc001gow.3/777, intron 7 of 46)	1	181701520	181746052	44533	1	777	uc001gox.1	-50948	ENSG00000198216	CACNA1E	calcium voltage-gated channel subunit alpha1 E
chr1	181693605	181694424	820	*	MACS_peak_1805	52.84	Exon (uc001gow.3/777, exon 17 of 47)	1	181701520	181746052	44533	1	777	uc001gox.1	-7096	ENSG00000198216	CACNA1E	calcium voltage-gated channel subunit alpha1 E
chr1	181695207	181696076	870	*	MACS_peak_1806	66.05	Exon (uc001gow.3/777, exon 18 of 47)	1	181701520	181746052	44533	1	777	uc001gox.1	-5444	ENSG00000198216	CACNA1E	calcium voltage-gated channel subunit alpha1 E
chr1	181707995	181708876	882	*	MACS_peak_1807	182.08	Exon (uc001gow.3/777, exon 25 of 47)	1	181701520	181746052	44533	1	777	uc001gox.1	6475	ENSG00000198216	CACNA1E	calcium voltage-gated channel subunit alpha1 E
chr1	182758281	182759293	1013	*	MACS_peak_1815	81.22	Promoter (<=1kb)	1	182758584	182791334	32751	1	80896	uc010pnx.2	0	ENSG00000135838	NPL	N-acetylneuraminate pyruvate lyase
chr1	182853768	182854649	882	*	MACS_peak_1816	78.87	Exon (uc001gpr.3/1660, exon 27 of 28)	1	182850399	182857117	6719	1	1660	uc009wyd.3	3369	ENSG00000135829	DHX9	DExH-box helicase 9
chr1	182873248	182873883	636	*	MACS_peak_1817	118.74	Exon (uc001gpu.3/81626, exon 8 of 10)	1	182850399	182857117	6719	1	1660	uc009wyd.3	22849	ENSG00000135829	DHX9	DExH-box helicase 9
chr1	182992307	182993739	1433	*	MACS_peak_1819	54.62	Promoter (<=1kb)	1	182992595	183074191	81597	1	3915	uc001gpx.3	0	ENSG00000135862	LAMC1	laminin subunit gamma 1
chr1	183094322	183095033	712	*	MACS_peak_1820	125.06	Exon (uc001gpy.4/3915, exon 15 of 28)	1	183155174	183210406	55233	1	3918	uc001gpz.4	-60141	ENSG00000058085	LAMC2	laminin subunit gamma 2
chr1	183162851	183163489	639	*	MACS_peak_1821	72.85	Intron (uc001gpz.4/3918, intron 1 of 21)	1	183155174	183214262	59089	1	3918	uc001gqa.2	7677	ENSG00000058085	LAMC2	laminin subunit gamma 2
chr1	183255599	183256863	1265	*	MACS_peak_1822	117.9	Exon (uc001gqb.2/23057, exon 5 of 11)	1	183252008	183259878	7871	2	23057	uc001gqd.3	3015	ENSG00000157064	NMNAT2	nicotinamide nucleotide adenylyltransferase 2
chr1	183361766	183362686	921	*	MACS_peak_1823	100.26	Intron (uc001gqc.2/23057, intron 1 of 10)	1	183217372	183387634	170263	2	23057	uc001gqc.2	24948	ENSG00000157064	NMNAT2	nicotinamide nucleotide adenylyltransferase 2
chr1	183466254	183467003	750	*	MACS_peak_1824	154.31	Intron (uc010pob.2/9887, intron 1 of 17)	1	183441506	183523328	81823	1	9887	uc010poc.2	24748	ENSG00000116698	SMG7	SMG7, nonsense mediated mRNA decay factor
chr1	183536146	183537343	1198	*	MACS_peak_1825	75.45	Exon (uc001gqj.4/4688, exon 8 of 15)	1	183524697	183559739	35043	2	4688	uc001gqj.4	22396	ENSG00000116701	NCF2	neutrophil cytosolic factor 2
chr1	183604442	183605628	1187	*	MACS_peak_1826	453.98	Promoter (<=1kb)	1	183595328	183605076	9749	2	10092	uc001gql.4	0	ENSG00000162704	ARPC5	actin related protein 2/3 complex subunit 5
chr1	183681148	183682065	918	*	MACS_peak_1827	68.83	Intron (uc010pof.1/23179, intron 1 of 11)	1	183615411	183622448	7038	2	403314	uc001gqn.3	-58700	ENSG00000173627	APOBEC4	apolipoprotein B mRNA editing enzyme catalytic polypeptide like 4
chr1	183756072	183756602	531	*	MACS_peak_1828	53.1	Intron (uc010pof.1/23179, intron 2 of 11)	1	183774275	183897666	123392	1	23179	uc001gqo.3	-17673	ENSG00000143344	RGL1	ral guanine nucleotide dissociation stimulator like 1
chr1	183756696	183757370	675	*	MACS_peak_1829	78.19	Intron (uc010pof.1/23179, intron 2 of 11)	1	183774275	183897666	123392	1	23179	uc001gqo.3	-16905	ENSG00000143344	RGL1	ral guanine nucleotide dissociation stimulator like 1
chr1	183911839	183912619	781	*	MACS_peak_1830	245.8	Intron (uc010poj.1/23127, intron 10 of 11)	1	183904966	183915752	10787	2	23127	uc001gqp.3	3133	ENSG00000198756	COLGALT2	collagen beta(1-O)galactosyltransferase 2
chr1	183951080	183951969	890	*	MACS_peak_1831	63.17	Intron (uc010poj.1/23127, intron 1 of 11)	1	183904966	183933634	28669	2	23127	uc001gqq.3	-17446	ENSG00000198756	COLGALT2	collagen beta(1-O)galactosyltransferase 2
chr1	183970930	183971637	708	*	MACS_peak_1832	101.7	Intron (uc010poj.1/23127, intron 1 of 11)	1	183898796	184006863	108068	2	23127	uc010poj.1	35226	ENSG00000198756	COLGALT2	collagen beta(1-O)galactosyltransferase 2
chr1	183989838	183990660	823	*	MACS_peak_1833	212.99	Intron (uc010poj.1/23127, intron 1 of 11)	1	183898796	184006863	108068	2	23127	uc010poj.1	16203	ENSG00000198756	COLGALT2	collagen beta(1-O)galactosyltransferase 2
chr1	184769892	184771206	1315	*	MACS_peak_1835	84.29	Intron (uc001gra.4/116496, intron 12 of 13)	1	184689660	184724041	34382	2	80267	uc001gqy.3	-45851	ENSG00000116406	EDEM3	ER degradation enhancing alpha-mannosidase like protein 3
chr1	184774879	184775852	974	*	MACS_peak_1836	102.68	3' UTR	1	184689660	184724041	34382	2	80267	uc001gqy.3	-50838	ENSG00000116406	EDEM3	ER degradation enhancing alpha-mannosidase like protein 3
chr1	184812598	184813521	924	*	MACS_peak_1837	72.87	Intron (uc001gra.4/116496, intron 5 of 13)	1	184763252	184837177	73926	2	116496	uc001grb.1	23656	ENSG00000135842	FAM129A	family with sequence similarity 129 member A
chr1	184844395	184845053	659	*	MACS_peak_1838	106.65	Intron (uc001gra.4/116496, intron 5 of 13)	1	184763252	184837177	73926	2	116496	uc001grb.1	-7218	ENSG00000135842	FAM129A	family with sequence similarity 129 member A
chr1	185127834	185128462	629	*	MACS_peak_1839	57.27	Promoter (1-2kb)	1	185126291	185260913	134623	1	54823	uc001grh.4	1543	ENSG00000116668	SWT1	SWT1, RNA endoribonuclease homolog
chr1	185287615	185288372	758	*	MACS_peak_1840	62.4	Promoter (1-2kb)	1	185265522	185286461	20940	2	10625	uc009wyk.3	-1154	ENSG00000116679	IVNS1ABP	influenza virus NS1A binding protein
chr1	185744448	185745179	732	*	MACS_peak_1845	50.7	Intron (uc001grq.1/83872, intron 1 of 106)	1	185703683	186160085	456403	1	83872	uc001grq.1	40765	ENSG00000143341	HMCN1	hemicentin 1
chr1	185759340	185760040	701	*	MACS_peak_1846	108.51	Intron (uc001grq.1/83872, intron 1 of 106)	1	185703683	186160085	456403	1	83872	uc001grq.1	55657	ENSG00000143341	HMCN1	hemicentin 1
chr1	186051183	186051843	661	*	MACS_peak_1847	106.44	Intron (uc001grq.1/83872, intron 56 of 106)	1	186097210	186160085	62876	1	83872	uc001grs.1	-45367	ENSG00000143341	HMCN1	hemicentin 1
chr1	186162480	186163284	805	*	MACS_peak_1848	61.74	Intron (uc021pgf.1/100302192, intron 1 of 1)	1	186097210	186160085	62876	1	83872	uc001grs.1	65270	ENSG00000143341	HMCN1	hemicentin 1
chr1	192625457	192626142	686	*	MACS_peak_1872	70.99	Intron (uc001gsj.3/6003, intron 5 of 6)	1	192605268	192629440	24173	1	6003	uc001gsk.3	20189	ENSG00000127074	RGS13	regulator of G protein signaling 13
chr1	193073625	193075003	1379	*	MACS_peak_1874	58.55	Promoter (<=1kb)	1	193065595	193074608	9014	2	51022	uc001gsz.2	0	ENSG00000023572	GLRX2	glutaredoxin 2
chr1	193182973	193183646	674	*	MACS_peak_1875	167.71	Intron (uc001gtb.3/79577, intron 13 of 16)	1	193147860	193155743	7884	2	8707	uc001gtc.4	-27230	ENSG00000162630	B3GALT2	beta-1,3-galactosyltransferase 2
chr1	196412855	196413454	600	*	MACS_peak_1887	51.44	Intron (uc009wyt.1/343450, intron 2 of 20)	1	196194913	196436916	242004	2	343450	uc009wyt.1	23462	ENSG00000162687	KCNT2	potassium sodium-activated channel subfamily T member 2
chr1	197438743	197439391	649	*	MACS_peak_1888	179.36	Intron (uc010poz.2/23418, intron 14 of 14)	1	197382959	197413949	30991	1	23418	uc001gub.1	55784	ENSG00000134376	CRB1	crumbs 1, cell polarity complex component
chr1	197695220	197695807	588	*	MACS_peak_1889	86.18	Intron (uc010ppf.2/163486, intron 2 of 19)	1	197473879	197744623	270745	2	163486	uc010ppf.2	48816	ENSG00000213047	DENND1B	DENN domain containing 1B
chr1	198775853	198776345	493	*	MACS_peak_1892	59.44	Downstream (<1kb)	1	198828002	198828111	110	2	406955	uc001gux.1	51766	ENSG00000207975	MIR181B1	microRNA 181b-1
chr1	198847315	198848054	740	*	MACS_peak_1893	55.34	Intron (uc021pgz.1/100131234, intron 2 of 2)	1	198828173	198828282	110	2	406995	uc001guy.3	-19033	ENSG00000207759	MIR181A1	microRNA 181a-1
chr1	198906301	198906821	521	*	MACS_peak_1894	65.68	Promoter (<=1kb)	1	198777132	198906558	129427	2	100131234	uc021pgz.1	0	NA	MIR181A1HG	MIR181A1 host gene
chr1	200996939	200998180	1242	*	MACS_peak_1896	177.41	Exon (uc001gvu.3/uc001gvu.3, exon 2 of 2)	1	200938514	200992828	54315	2	23046	uc010ppn.2	-4111	ENSG00000116852	KIF21B	kinesin family member 21B
chr1	201738950	201739599	650	*	MACS_peak_1904	88.35	Intron (uc001gwu.3/89796, intron 3 of 28)	1	201751304	201767736	16433	1	89796	uc001gwy.1	-11705	ENSG00000134369	NAV1	neuron navigator 1
chr1	202317469	202318454	986	*	MACS_peak_1905	63.31	Promoter (<=1kb)	1	202317830	202407370	89541	1	4660	uc001gxy.3	0	ENSG00000077157	PPP1R12B	protein phosphatase 1 regulatory subunit 12B
chr1	202554313	202554946	634	*	MACS_peak_1906	64.62	3' UTR	1	202509242	202557697	48456	1	4660	uc021pho.1	45071	ENSG00000077157	PPP1R12B	protein phosphatase 1 regulatory subunit 12B
chr1	202622938	202623990	1053	*	MACS_peak_1907	329.63	Intron (uc009xaf.3/127833, intron 1 of 6)	1	202559725	202612581	52857	2	127833	uc001gye.3	-10357	ENSG00000143858	SYT2	synaptotagmin 2
chr1	202790738	202792343	1606	*	MACS_peak_1908	683.13	Promoter (1-2kb)	1	202794329	202795421	1093	1	641515	uc021php.1	-1986	ENSG00000184774	MGAT4EP	MGAT4 family member E, pseudogene
chr1	202823521	202825144	1624	*	MACS_peak_1909	197.74	Intron (uc021phq.1/uc021phq.1, intron 2 of 3)	1	202830882	202844369	13488	1	148709	uc001gyk.1	-5738	ENSG00000234996	LOC148709	actin pseudogene
chr1	202895796	202896834	1039	*	MACS_peak_1910	1093.88	Promoter (<=1kb)	1	202860230	202896371	36142	2	59349	uc001gyo.1	0	ENSG00000117153	KLHL12	kelch like family member 12
chr1	203232811	203233611	801	*	MACS_peak_1911	97.96	Intron (uc001gzm.1/1118, intron 1 of 11)	1	203181959	203241937	59979	2	1118	uc001gzm.1	8326	ENSG00000133063	CHIT1	chitinase 1
chr1	203239862	203240797	936	*	MACS_peak_1912	238.74	Promoter (1-2kb)	1	203181959	203241937	59979	2	1118	uc001gzm.1	1140	ENSG00000133063	CHIT1	chitinase 1
chr1	203266447	203267257	811	*	MACS_peak_1913	60.62	Downstream (<1kb)	1	203267886	203274453	6568	2	730227	uc001gzp.2	7196	ENSG00000233791	LINC01136	long intergenic non-protein coding RNA 1136
chr1	203314401	203316922	2522	*	MACS_peak_1914	161.03	Exon (uc001gzr.3/2331, exon 2 of 3)	1	203309752	203320289	10538	2	2331	uc001gzr.3	3367	ENSG00000122176	FMOD	fibromodulin
chr1	203605243	203606136	894	*	MACS_peak_1920	62.93	Intron (uc001gzv.3/493, intron 1 of 21)	1	203595915	203713209	117295	1	493	uc001gzw.3	9328	ENSG00000058668	ATP2B4	ATPase plasma membrane Ca2+ transporting 4
chr1	203764153	203765098	946	*	MACS_peak_1921	550.25	Promoter (<=1kb)	1	203764751	203823256	58506	1	9877	uc001hac.3	0	ENSG00000058673	ZC3H11A	zinc finger CCCH-type containing 11A
chr1	203830402	203831147	746	*	MACS_peak_1922	80.3	Promoter (<=1kb)	1	203830727	203840280	9554	1	6635	uc010pqn.3	0	ENSG00000182004	SNRPE	small nuclear ribonucleoprotein polypeptide E
chr1	204080033	204080700	668	*	MACS_peak_1924	141.55	Promoter (1-2kb)	1	204082043	204096871	14829	1	9580	uc010pqp.2	-1343	ENSG00000143842	SOX13	SRY-box 13
chr1	204083447	204084346	900	*	MACS_peak_1925	123.27	Promoter (<=1kb)	1	204085193	204096871	11679	1	9580	uc010pqq.2	-847	ENSG00000143842	SOX13	SRY-box 13
chr1	204209144	204209711	568	*	MACS_peak_1926	163.65	Promoter (2-3kb)	1	204210503	204212372	1870	2	22874	uc009xau.1	2661	ENSG00000143850	PLEKHA6	pleckstrin homology domain containing A6
chr1	204283903	204285342	1440	*	MACS_peak_1927	58.44	Intron (uc001hau.4/22874, intron 1 of 22)	1	204187979	204329057	141079	2	22874	uc001hau.4	43715	ENSG00000143850	PLEKHA6	pleckstrin homology domain containing A6
chr1	204293510	204294321	812	*	MACS_peak_1928	53.29	Intron (uc001hau.4/22874, intron 1 of 22)	1	204187979	204329057	141079	2	22874	uc001hau.4	34736	ENSG00000143850	PLEKHA6	pleckstrin homology domain containing A6
chr1	204434682	204436145	1464	*	MACS_peak_1930	50.48	Intron (uc001haw.3/5287, intron 3 of 33)	1	204391758	204459474	67717	2	5287	uc001haw.3	23329	ENSG00000133056	PIK3C2B	phosphatidylinositol-4-phosphate 3-kinase catalytic subunit type 2 beta
chr1	204535684	204536792	1109	*	MACS_peak_1931	50.27	Intron (uc010pqy.2/4194, intron 6 of 8)	1	204494368	204528188	33821	1	4194	uc009xbe.1	41316	ENSG00000198625	MDM4	MDM4, p53 regulator
chr1	204635152	204636072	921	*	MACS_peak_1932	144.43	Intron (uc001hbd.2/4194, intron 11 of 11)	1	204586303	204654597	68295	2	10446	uc001hbe.1	18525	ENSG00000170382	LRRN2	leucine rich repeat neuronal 2
chr1	204664513	204665464	952	*	MACS_peak_1933	574.69	Intron (uc001hbd.2/4194, intron 11 of 11)	1	204586303	204654597	68295	2	10446	uc009xbf.1	-9916	ENSG00000170382	LRRN2	leucine rich repeat neuronal 2
chr1	204815327	204816292	966	*	MACS_peak_1935	186.02	Intron (uc001hbh.3/23114, intron 1 of 15)	1	204797782	204991950	194169	1	23114	uc010pra.2	17545	ENSG00000163531	NFASC	neurofascin
chr1	204853410	204854575	1166	*	MACS_peak_1936	227.82	Intron (uc001hbh.3/23114, intron 1 of 15)	1	204839990	204943811	103822	1	23114	uc009xbg.1	13420	ENSG00000163531	NFASC	neurofascin
chr1	204868464	204869136	673	*	MACS_peak_1937	88.09	Intron (uc001hbh.3/23114, intron 1 of 15)	1	204839990	204943811	103822	1	23114	uc009xbg.1	28474	ENSG00000163531	NFASC	neurofascin
chr1	204937733	204938991	1259	*	MACS_peak_1938	94.7	5' UTR	1	204926784	204959691	32908	1	23114	uc001hbk.1	10949	ENSG00000163531	NFASC	neurofascin
chr1	205132530	205133157	628	*	MACS_peak_1940	62.13	5' UTR	1	205129134	205143643	14510	2	25778	uc001hby.1	10486	ENSG00000133059	DSTYK	dual serine/threonine and tyrosine protein kinase
chr1	205179627	205181219	1593	*	MACS_peak_1941	67.79	Promoter (<=1kb)	1	205111631	205180727	69097	2	25778	uc001hbw.3	0	ENSG00000133059	DSTYK	dual serine/threonine and tyrosine protein kinase
chr1	205216136	205217181	1046	*	MACS_peak_1943	188.34	Promoter (<=1kb)	1	205215725	205242471	26747	1	9911	uc001hca.3	411	ENSG00000133069	TMCC2	transmembrane and coiled-coil domain family 2
chr1	205226880	205229034	2155	*	MACS_peak_1944	384.93	Promoter (<=1kb)	1	205226359	205242471	16113	1	9911	uc001hcc.2	521	ENSG00000133069	TMCC2	transmembrane and coiled-coil domain family 2
chr1	205293686	205295040	1355	*	MACS_peak_1945	238.16	Promoter (2-3kb)	1	205271191	205290883	19693	2	81788	uc001hce.3	-2803	ENSG00000163545	NUAK2	NUAK family kinase 2
chr1	205416043	205417713	1671	*	MACS_peak_1947	54.29	Promoter (<=1kb)	1	205417430	205417526	97	2	442891	uc010prh.1	0	ENSG00000199059	MIR135B	microRNA 135b
chr1	205473603	205475101	1499	*	MACS_peak_1948	69.73	Promoter (<=1kb)	1	205473684	205492843	19160	1	5129	uc009xbk.2	0	ENSG00000117266	CDK18	cyclin dependent kinase 18
chr1	205743902	205745043	1142	*	MACS_peak_1949	59.37	Promoter (<=1kb)	1	205737114	205744610	7497	2	8934	uc001hde.4	0	ENSG00000117280	RAB29	RAB29, member RAS oncogene family
chr1	206751665	206752565	901	*	MACS_peak_1951	55.4	Intron (uc001hec.1/83593, intron 2 of 3)	1	206756601	206762604	6004	1	83593	uc001heg.1	-4036	ENSG00000266094	RASSF5	Ras association domain family member 5
chr1	206778136	206778859	724	*	MACS_peak_1952	51.17	3' UTR	1	206764974	206785904	20931	2	1939	uc001heh.2	7045	ENSG00000143486	EIF2D	eukaryotic translation initiation factor 2D
chr1	207985141	207985979	839	*	MACS_peak_1956	102.85	Intron (uc001hgr.2/uc001hgr.2, intron 4 of 5)	1	207991724	207995941	4218	1	148696	uc010psi.2	-5745	NA	LOC148696	uncharacterized LOC148696
chr1	208259380	208260428	1049	*	MACS_peak_1958	158.94	Intron (uc001hgz.3/5362, intron 9 of 31)	1	208195588	208202551	6964	2	5362	uc001hgy.3	-56829	ENSG00000076356	PLXNA2	plexin A2
chr1	208284741	208285654	914	*	MACS_peak_1959	358.88	Intron (uc001hgz.3/5362, intron 4 of 31)	1	208195588	208202551	6964	2	5362	uc001hgy.3	-82190	ENSG00000076356	PLXNA2	plexin A2
chr1	208396282	208397245	964	*	MACS_peak_1960	50.08	Intron (uc001hgz.3/5362, intron 1 of 31)	1	208383348	208392095	8748	2	5362	uc001hha.4	-4187	ENSG00000076356	PLXNA2	plexin A2
chr1	209782577	209783301	725	*	MACS_peak_1967	56.88	Exon (uc001hhf.4/57172, exon 9 of 11)	1	209796789	209796855	67	2	100422894	uc021pil.1	13554	ENSG00000283876	MIR4260	microRNA 4260
chr1	210512652	210513474	823	*	MACS_peak_1971	52.67	Intron (uc009xcx.3/55733, intron 1 of 11)	1	210516626	210849638	333013	1	55733	uc010psu.2	-3152	ENSG00000054392	HHAT	hedgehog acyltransferase
chr1	210566792	210567593	802	*	MACS_peak_1972	61.18	Intron (uc009xcx.3/55733, intron 4 of 11)	1	210612927	210849638	236712	1	55733	uc001hia.4	-45334	ENSG00000054392	HHAT	hedgehog acyltransferase
chr1	210576631	210577097	467	*	MACS_peak_1973	53.08	Intron (uc009xcx.3/55733, intron 5 of 11)	1	210612927	210849638	236712	1	55733	uc001hia.4	-35830	ENSG00000054392	HHAT	hedgehog acyltransferase
chr1	210669190	210670159	970	*	MACS_peak_1974	80.6	Intron (uc009xcx.3/55733, intron 8 of 11)	1	210612927	210849638	236712	1	55733	uc001hia.4	56263	ENSG00000054392	HHAT	hedgehog acyltransferase
chr1	210673153	210673768	616	*	MACS_peak_1975	50.39	Intron (uc009xcx.3/55733, intron 8 of 11)	1	210612927	210849638	236712	1	55733	uc001hia.4	60226	ENSG00000054392	HHAT	hedgehog acyltransferase
chr1	210845285	210846056	772	*	MACS_peak_1976	69.06	Intron (uc009xcx.3/55733, intron 11 of 11)	1	210612927	210849638	236712	1	55733	uc001hia.4	232358	ENSG00000054392	HHAT	hedgehog acyltransferase
chr1	211079046	211080167	1122	*	MACS_peak_1977	142.93	Intron (uc001hib.2/3756, intron 7 of 10)	1	210851657	211307457	455801	2	3756	uc001hib.2	227290	ENSG00000143473	KCNH1	potassium voltage-gated channel subfamily H member 1
chr1	211499536	211500604	1069	*	MACS_peak_1980	60.25	Promoter (<=1kb)	1	211499957	211548286	48330	1	7188	uc001hih.3	0	ENSG00000082512	TRAF5	TNF receptor associated factor 5
chr1	212115195	212116057	863	*	MACS_peak_1982	72.4	Exon (uc001hiw.2/25896, exon 20 of 20)	1	212208919	212278187	69269	1	51514	uc001hiz.4	-92862	ENSG00000143476	DTL	denticleless E3 ubiquitin protein ligase homolog
chr1	212587907	212589434	1528	*	MACS_peak_1985	62.83	Promoter (<=1kb)	1	212537816	212588267	50452	2	55248	uc001hjc.4	0	ENSG00000065600	TMEM206	transmembrane protein 206
chr1	213225937	213226496	560	*	MACS_peak_1989	54.22	Promoter (1-2kb)	1	213224588	213446808	222221	1	26750	uc010ptv.2	1349	ENSG00000136643	RPS6KC1	ribosomal protein S6 kinase C1
chr1	214575731	214576462	732	*	MACS_peak_1993	54.68	5' UTR	1	214522039	214638300	116262	2	5784	uc021piy.1	61838	ENSG00000152104	PTPN14	protein tyrosine phosphatase, non-receptor type 14
chr1	214707753	214708391	639	*	MACS_peak_1994	103.93	Intron (uc001hkk.2/5784, intron 1 of 18)	1	214522039	214725024	202986	2	5784	uc001hkk.2	16633	ENSG00000152104	PTPN14	protein tyrosine phosphatase, non-receptor type 14
chr1	215225527	215226111	585	*	MACS_peak_1996	52.45	Intron (uc001hko.3/3776, intron 1 of 6)	1	215256560	215368435	111876	1	3776	uc010pua.1	-30449	ENSG00000082482	KCNK2	potassium two pore domain channel subfamily K member 2
chr1	215336502	215336885	384	*	MACS_peak_1997	60.51	Intron (uc001hko.3/3776, intron 3 of 6)	1	215256560	215410436	153877	1	3776	uc001hkr.4	79942	ENSG00000082482	KCNK2	potassium two pore domain channel subfamily K member 2
chr1	215957129	215957815	687	*	MACS_peak_1999	56.73	Intron (uc001hku.1/7399, intron 52 of 71)	1	215752343	215795149	42807	1	51133	uc009xdn.3	204786	ENSG00000136636	KCTD3	potassium channel tetramerization domain containing 3
chr1	216218765	216219233	469	*	MACS_peak_2000	58.65	Intron (uc001hku.1/7399, intron 32 of 71)	1	215796236	216596738	800503	2	7399	uc001hku.1	377505	ENSG00000042781	USH2A	usherin
chr1	216513660	216514300	641	*	MACS_peak_2001	99.22	Intron (uc001hku.1/7399, intron 4 of 71)	1	215796236	216596738	800503	2	7399	uc001hku.1	82438	ENSG00000042781	USH2A	usherin
chr1	216580034	216580643	610	*	MACS_peak_2002	58.62	Intron (uc001hku.1/7399, intron 3 of 71)	1	215796236	216596738	800503	2	7399	uc001hku.1	16095	ENSG00000042781	USH2A	usherin
chr1	219883618	219884488	871	*	MACS_peak_2008	95.95	Intron (uc001hlu.1/55532, intron 8 of 8)	1	220046619	220292777	246159	1	26828	uc021pjd.1	-162131	ENSG00000199377	RNU5F-1	RNA, U5F small nuclear 1
chr1	219898171	219899088	918	*	MACS_peak_2009	76.5	Intron (uc001hlu.1/55532, intron 8 of 8)	1	220046619	220292777	246159	1	26828	uc021pjd.1	-147531	ENSG00000199377	RNU5F-1	RNA, U5F small nuclear 1
chr1	219944165	219945078	914	*	MACS_peak_2010	76.67	Intron (uc001hlu.1/55532, intron 8 of 8)	1	220046619	220292777	246159	1	26828	uc021pjd.1	-101541	ENSG00000199377	RNU5F-1	RNA, U5F small nuclear 1
chr1	220106321	220106984	664	*	MACS_peak_2011	106.13	Intron (uc021pjd.1/26828, intron 1 of 1)	1	220087606	220101993	14388	2	55532	uc001hlx.4	-4328	ENSG00000196660	SLC30A10	solute carrier family 30 member 10
chr1	220445375	220446385	1011	*	MACS_peak_2012	701.95	Promoter (<=1kb)	1	220321610	220445843	124234	2	25782	uc001hmf.2	0	ENSG00000118873	RAB3GAP2	RAB3 GTPase activating non-catalytic protein subunit 2
chr1	220869757	220870896	1140	*	MACS_peak_2015	108.95	3' UTR	1	220863628	220872499	8872	1	79762	uc001hmp.1	6129	ENSG00000162817	C1orf115	chromosome 1 open reading frame 115
chr1	221507767	221508540	774	*	MACS_peak_2017	181.7	Promoter (1-2kb)	1	221503270	221509638	6369	2	400804	uc001hmw.1	1098	ENSG00000234754	C1orf140	uncharacterized LOC400804
chr1	222885626	222886608	983	*	MACS_peak_2023	851.85	Promoter (<=1kb)	1	222885906	222887245	1340	1	148362	uc001hnp.1	0	ENSG00000162819	BROX	BRO1 domain and CAAX motif containing
chr1	222927578	222928108	531	*	MACS_peak_2024	63.93	Intron (uc001hnr.1/uc001hnr.1, intron 1 of 2)	1	222910558	222924002	13445	1	400823	uc009xeb.3	17020	ENSG00000197520	FAM177B	family with sequence similarity 177 member B
chr1	223003206	223003663	458	*	MACS_peak_2026	90.71	Intron (uc001hnu.2/84976, intron 1 of 9)	1	222988431	223179337	190907	1	84976	uc001hnu.2	14775	ENSG00000154309	DISP1	dispatched RND transporter family member 1
chr1	223306421	223307222	802	*	MACS_peak_2027	59.4	Promoter (<=1kb)	1	223282748	223308206	25459	2	7100	uc001hnv.2	984	ENSG00000187554	TLR5	toll like receptor 5
chr1	223417418	223418310	893	*	MACS_peak_2028	78.11	Intron (uc001hnx.3/55061, intron 4 of 7)	1	223282748	223316624	33877	2	7100	uc001hnw.2	-100794	ENSG00000187554	TLR5	toll like receptor 5
chr1	223446573	223447459	887	*	MACS_peak_2029	70.81	Intron (uc001hnx.3/55061, intron 2 of 7)	1	223394161	223537401	143241	2	55061	uc001hnx.3	89942	ENSG00000143502	SUSD4	sushi domain containing 4
chr1	223486112	223486956	845	*	MACS_peak_2030	115.54	Intron (uc001hnx.3/55061, intron 1 of 7)	1	223394161	223537401	143241	2	55061	uc001hnx.3	50445	ENSG00000143502	SUSD4	sushi domain containing 4
chr1	223725007	223725751	745	*	MACS_peak_2031	89.51	Intron (uc009xee.2/388743, intron 10 of 17)	1	223714972	223853436	138465	2	388743	uc009xee.2	127685	ENSG00000203697	CAPN8	calpain 8
chr1	223913229	223914748	1520	*	MACS_peak_2032	52.81	Intron (uc010puy.2/824, intron 2 of 20)	1	223900119	223963720	63602	1	824	uc001hob.4	13110	ENSG00000162909	CAPN2	calpain 2
chr1	225548079	225548843	765	*	MACS_peak_2038	72.87	Exon (uc001how.2/127602, exon 73 of 84)	1	225589204	225615815	26612	2	3930	uc001hoy.3	66972	ENSG00000143815	LBR	lamin B receptor
chr1	226129151	226129972	822	*	MACS_peak_2039	272.05	Promoter (<=1kb)	1	226124298	226129083	4786	2	7044	uc010pvk.2	-68	ENSG00000143768	LEFTY2	left-right determination factor 2
chr1	226270411	226271722	1312	*	MACS_peak_2040	288.8	Exon (uc001hpx.3/uc001hpx.3, exon 1 of 4)	1	226251678	226259703	8026	1	440926	uc021pjv.1	18733	NA	H3F3AP4	H3 histone, family 3A, pseudogene 4
chr1	226563757	226564607	851	*	MACS_peak_2041	56.66	Intron (uc001hqd.4/142, intron 13 of 22)	1	226548392	226595801	47410	2	142	uc001hqd.4	31194	ENSG00000143799	PARP1	poly(ADP-ribose) polymerase 1
chr1	226589948	226591536	1589	*	MACS_peak_2042	101.32	Exon (uc001hqd.4/142, exon 2 of 23)	1	226548392	226595801	47410	2	142	uc001hqd.4	4265	ENSG00000143799	PARP1	poly(ADP-ribose) polymerase 1
chr1	226723187	226723982	796	*	MACS_peak_2044	54.2	3' UTR	1	226736501	226796915	60415	1	375057	uc021pjw.1	-12519	ENSG00000203685	STUM	stum, mechanosensory transduction mediator homolog
chr1	226820488	226821144	657	*	MACS_peak_2045	53.1	3' UTR	1	226736501	226796915	60415	1	375057	uc021pjx.1	83987	ENSG00000203685	STUM	stum, mechanosensory transduction mediator homolog
chr1	226850311	226851400	1090	*	MACS_peak_2046	194.7	Intron (uc010pvo.2/3707, intron 2 of 7)	1	226819391	226926876	107486	2	3707	uc010pvo.2	75476	ENSG00000143772	ITPKB	inositol-trisphosphate 3-kinase B
chr1	226867468	226868277	810	*	MACS_peak_2047	66.05	Intron (uc010pvo.2/3707, intron 2 of 7)	1	226819391	226926876	107486	2	3707	uc010pvo.2	58599	ENSG00000143772	ITPKB	inositol-trisphosphate 3-kinase B
chr1	226890917	226891771	855	*	MACS_peak_2048	427.84	Intron (uc010pvo.2/3707, intron 2 of 7)	1	226819391	226926876	107486	2	3707	uc010pvo.2	35105	ENSG00000143772	ITPKB	inositol-trisphosphate 3-kinase B
chr1	226895955	226897123	1169	*	MACS_peak_2049	63.95	Intron (uc010pvo.2/3707, intron 2 of 7)	1	226819391	226926876	107486	2	3707	uc010pvo.2	29753	ENSG00000143772	ITPKB	inositol-trisphosphate 3-kinase B
chr1	228117517	228118322	806	*	MACS_peak_2054	172.77	Intron (uc001hri.2/7483, intron 1 of 3)	1	228129291	228129384	94	2	100847072	uc031psm.1	11062	ENSG00000264483	MIR5008	microRNA 5008
chr1	228363092	228364710	1619	*	MACS_peak_2055	54.68	Promoter (<=1kb)	1	228362251	228369958	7708	1	200205	uc010pvw.2	841	ENSG00000181873	IBA57	IBA57 homolog, iron-sulfur cluster assembly
chr1	228388636	228389575	940	*	MACS_peak_2056	102.02	Downstream (1-2kb)	1	228395831	228548951	153121	1	84033	uc001hsn.4	-6256	ENSG00000154358	OBSCN	obscurin, cytoskeletal calmodulin and titin-interacting RhoGEF
chr1	229406350	229407267	918	*	MACS_peak_2062	61.53	Promoter (<=1kb)	1	229406809	229441640	34832	1	5867	uc001hth.4	0	ENSG00000168118	RAB4A	RAB4A, member RAS oncogene family
chr1	230296717	230297522	806	*	MACS_peak_2066	84.51	Intron (uc010pvy.1/2590, intron 1 of 15)	1	230202956	230417875	214920	1	2590	uc010pwa.1	93761	ENSG00000143641	GALNT2	polypeptide N-acetylgalactosaminyltransferase 2
chr1	230299774	230300380	607	*	MACS_peak_2067	93.45	Intron (uc010pvy.1/2590, intron 1 of 15)	1	230202956	230417875	214920	1	2590	uc010pwa.1	96818	ENSG00000143641	GALNT2	polypeptide N-acetylgalactosaminyltransferase 2
chr1	230326535	230327227	693	*	MACS_peak_2068	268	Intron (uc010pvy.1/2590, intron 2 of 15)	1	230397616	230417875	20260	1	2590	uc001htu.2	-70389	ENSG00000143641	GALNT2	polypeptide N-acetylgalactosaminyltransferase 2
chr1	230480975	230481847	873	*	MACS_peak_2069	64.62	Intron (uc031psq.1/79605, intron 3 of 6)	1	230457392	230561674	104283	2	79605	uc031psq.1	79827	ENSG00000177614	PGBD5	piggyBac transposable element derived 5
chr1	230497418	230498371	954	*	MACS_peak_2070	169.19	Intron (uc031psq.1/79605, intron 1 of 6)	1	230457392	230561674	104283	2	79605	uc031psq.1	63303	ENSG00000177614	PGBD5	piggyBac transposable element derived 5
chr1	230498404	230499169	766	*	MACS_peak_2071	90.42	Intron (uc031psq.1/79605, intron 1 of 6)	1	230457392	230561674	104283	2	79605	uc031psq.1	62505	ENSG00000177614	PGBD5	piggyBac transposable element derived 5
chr1	230843791	230844952	1162	*	MACS_peak_2074	97.78	Intron (uc001hty.4/183, intron 2 of 4)	1	230838272	230850336	12065	2	183	uc001hty.4	5384	ENSG00000135744	AGT	angiotensinogen
chr1	230994542	230995481	940	*	MACS_peak_2075	60.27	Promoter (2-3kb)	1	230972865	230991782	18918	2	84886	uc009xfh.2	-2760	ENSG00000119280	C1orf198	chromosome 1 open reading frame 198
chr1	231013175	231013801	627	*	MACS_peak_2076	203.76	Intron (uc001hue.1/uc001hue.1, intron 2 of 2)	1	230972865	231005335	32471	2	84886	uc001hud.2	-7840	ENSG00000119280	C1orf198	chromosome 1 open reading frame 198
chr1	231057407	231058165	759	*	MACS_peak_2077	71.82	Intron (uc001huf.4/79573, intron 15 of 22)	1	230972865	231005335	32471	2	84886	uc001hud.2	-52072	ENSG00000119280	C1orf198	chromosome 1 open reading frame 198
chr1	231308074	231308803	730	*	MACS_peak_2078	100.8	Intron (uc009xfn.1/440730, intron 1 of 9)	1	231298674	231357314	58641	1	440730	uc009xfn.1	9400	ENSG00000119283	TRIM67	tripartite motif containing 67
chr1	231328030	231329105	1076	*	MACS_peak_2079	172.52	Intron (uc009xfn.1/440730, intron 1 of 9)	1	231319845	231323373	3529	2	149373	uc031pss.1	-4657	ENSG00000235710	LOC149373	uncharacterized LOC149373
chr1	231329282	231330245	964	*	MACS_peak_2080	142.81	Intron (uc009xfn.1/440730, intron 1 of 9)	1	231319845	231323373	3529	2	149373	uc031pss.1	-5909	ENSG00000235710	LOC149373	uncharacterized LOC149373
chr1	231336023	231337010	988	*	MACS_peak_2081	101.79	Intron (uc009xfn.1/440730, intron 4 of 9)	1	231319845	231323373	3529	2	149373	uc031pss.1	-12650	ENSG00000235710	LOC149373	uncharacterized LOC149373
chr1	231504843	231505549	707	*	MACS_peak_2082	75.75	Intron (uc001huu.3/54583, intron 3 of 4)	1	231473682	231490769	17088	1	83932	uc001hut.4	31161	ENSG00000010072	SPRTN	SprT-like N-terminal domain
chr1	231512554	231513415	862	*	MACS_peak_2083	72.47	Intron (uc001huu.3/54583, intron 1 of 4)	1	231473682	231490769	17088	1	83932	uc001hut.4	38872	ENSG00000010072	SPRTN	SprT-like N-terminal domain
chr1	231869944	231870552	609	*	MACS_peak_2085	131.91	Intron (uc010pwf.2/100303453, intron 7 of 7)	1	231950372	231954263	3892	2	27184	uc001hvd.3	83711	NA	DISC2	disrupted in schizophrenia 2 (non-protein coding)
chr1	232039232	232039992	761	*	MACS_peak_2086	425.03	Intron (uc010pwl.2/100303453, intron 12 of 15)	1	231950372	231954263	3892	2	27184	uc001hvd.3	-84969	NA	DISC2	disrupted in schizophrenia 2 (non-protein coding)
chr1	234116897	234117605	709	*	MACS_peak_2094	74.24	Intron (uc001hvy.1/148641, intron 2 of 7)	1	234040679	234460262	419584	1	148641	uc001hvy.1	76218	ENSG00000183780	SLC35F3	solute carrier family 35 member F3
chr1	234548196	234549067	872	*	MACS_peak_2095	57.01	Intron (uc001hwd.3/6894, intron 22 of 29)	1	234509429	234519795	10367	1	388753	uc001hwc.3	38767	ENSG00000168275	COA6	cytochrome c oxidase assembly factor 6
chr1	234663787	234664693	907	*	MACS_peak_2096	416.95	Promoter (2-3kb)	1	234663637	234667525	3889	2	100506795	uc001hwe.3	2832	ENSG00000231768	LINC01354	long intergenic non-protein coding RNA 1354
chr1	234746040	234747167	1128	*	MACS_peak_2098	50.52	Promoter (<=1kb)	1	234740015	234745271	5257	2	359948	uc001hwg.3	-769	ENSG00000168264	IRF2BP2	interferon regulatory factor 2 binding protein 2
chr1	234748077	234749015	939	*	MACS_peak_2099	107.52	Promoter (2-3kb)	1	234740015	234745271	5257	2	359948	uc001hwg.3	-2806	ENSG00000168264	IRF2BP2	interferon regulatory factor 2 binding protein 2
chr1	234859059	234860534	1476	*	MACS_peak_2100	65.23	Promoter (<=1kb)	1	234859789	234867390	7602	1	100506810	uc001hwj.2	0	ENSG00000227630	LINC01132	long intergenic non-protein coding RNA 1132
chr1	235291647	235292791	1145	*	MACS_peak_2103	109.49	Promoter (<=1kb)	1	235272658	235292256	19599	2	9804	uc001hwl.3	0	ENSG00000173726	TOMM20	translocase of outer mitochondrial membrane 20
chr1	235612863	235613310	448	*	MACS_peak_2104	63.43	3' UTR	1	235610505	235667781	57277	2	148789	uc001hxc.3	54471	ENSG00000162885	B3GALNT2	beta-1,3-N-acetylgalactosaminyltransferase 2
chr1	235667268	235668763	1496	*	MACS_peak_2105	58.55	Promoter (<=1kb)	1	235610505	235667781	57277	2	148789	uc001hxc.3	0	ENSG00000162885	B3GALNT2	beta-1,3-N-acetylgalactosaminyltransferase 2
chr1	235821162	235821806	645	*	MACS_peak_2106	53.1	Downstream (2-3kb)	1	235710985	235814054	103070	2	2786	uc009xfz.3	-7108	ENSG00000168243	GNG4	G protein subunit gamma 4
chr1	236142398	236143834	1437	*	MACS_peak_2112	103.15	Exon (uc009xgc.3/4811, exon 6 of 9)	1	236139132	236175343	36212	2	4811	uc009xgc.3	31509	ENSG00000116962	NID1	nidogen 1
chr1	236216538	236217139	602	*	MACS_peak_2113	153.66	Intron (uc001hxo.3/4811, intron 1 of 19)	1	236139132	236228481	89350	2	4811	uc001hxo.3	11342	ENSG00000116962	NID1	nidogen 1
chr1	236310115	236311033	919	*	MACS_peak_2114	77.06	Intron (uc001hxq.3/7107, intron 1 of 6)	1	236305832	236372209	66378	1	7107	uc001hxq.3	4283	ENSG00000077585	GPR137B	G protein-coupled receptor 137B
chr1	236311351	236313665	2315	*	MACS_peak_2115	191.2	Intron (uc001hxq.3/7107, intron 1 of 6)	1	236305832	236372209	66378	1	7107	uc001hxq.3	5519	ENSG00000077585	GPR137B	G protein-coupled receptor 137B
chr1	236313927	236314700	774	*	MACS_peak_2116	58.77	Intron (uc001hxq.3/7107, intron 1 of 6)	1	236305832	236372209	66378	1	7107	uc001hxq.3	8095	ENSG00000077585	GPR137B	G protein-coupled receptor 137B
chr1	236328648	236329503	856	*	MACS_peak_2117	200.57	Intron (uc001hxq.3/7107, intron 1 of 6)	1	236305832	236372209	66378	1	7107	uc001hxq.3	22816	ENSG00000077585	GPR137B	G protein-coupled receptor 137B
chr1	236331908	236332701	794	*	MACS_peak_2118	137.82	Exon (uc001hxq.3/7107, exon 2 of 7)	1	236305832	236372209	66378	1	7107	uc001hxq.3	26076	ENSG00000077585	GPR137B	G protein-coupled receptor 137B
chr1	236687414	236688127	714	*	MACS_peak_2120	190.34	Promoter (<=1kb)	1	236686369	236687808	1440	2	100287902	uc001hxx.3	0	ENSG00000223776	LGALS8-AS1	LGALS8 antisense RNA 1
chr1	236698810	236699461	652	*	MACS_peak_2121	156.53	Intron (uc001hxw.2/3964, intron 3 of 11)	1	236689268	236716279	27012	1	3964	uc001hyc.2	9542	ENSG00000116977	LGALS8	galectin 8
chr1	236767520	236768597	1078	*	MACS_peak_2122	203.22	Promoter (<=1kb)	1	236712305	236767841	55537	2	55127	uc001hyd.2	0	ENSG00000119285	HEATR1	HEAT repeat containing 1
chr1	237267055	237267710	656	*	MACS_peak_2125	68.95	Intron (uc001hyl.1/6262, intron 1 of 104)	1	237205702	237997288	791587	1	6262	uc001hyl.1	61353	ENSG00000198626	RYR2	ryanodine receptor 2
chr1	237824813	237825390	578	*	MACS_peak_2126	93.19	Intron (uc001hyl.1/6262, intron 56 of 104)	1	237838031	237889608	51578	1	6262	uc010pxz.1	-12641	ENSG00000198626	RYR2	ryanodine receptor 2
chr1	239628785	239629275	491	*	MACS_peak_2132	68.38	Intron (uc001hyo.1/1131, intron 1 of 8)	1	239549865	240049896	500032	1	1131	uc001hyo.1	78920	ENSG00000133019	CHRM3	cholinergic receptor muscarinic 3
chr1	239725217	239725979	763	*	MACS_peak_2133	282.9	Intron (uc001hyo.1/1131, intron 3 of 8)	1	239792373	240072717	280345	1	1131	uc001hyp.3	-66394	ENSG00000133019	CHRM3	cholinergic receptor muscarinic 3
chr1	240169107	240169766	660	*	MACS_peak_2134	177.82	Promoter (1-2kb)	1	240170824	240176560	5737	1	645884	uc021pld.1	-1058	NA	RPS7P5	ribosomal protein S7 pseudogene 5
chr1	240515691	240516693	1003	*	MACS_peak_2135	63.81	Intron (uc010pyd.2/56776, intron 13 of 17)	1	240620794	240638489	17696	1	56776	uc001hyr.3	-104101	ENSG00000155816	FMN2	formin 2
chr1	240653372	240654092	721	*	MACS_peak_2136	77.56	3' UTR	1	240620794	240638489	17696	1	56776	uc001hyr.3	32578	ENSG00000155816	FMN2	formin 2
chr1	241046665	241047273	609	*	MACS_peak_2137	56.21	Intron (uc010pyh.2/6000, intron 6 of 17)	1	240938817	241032152	93336	2	6000	uc001hyt.2	-14513	ENSG00000182901	RGS7	regulator of G protein signaling 7
chr1	241330269	241330888	620	*	MACS_peak_2138	110.9	Intron (uc010pyj.1/6000, intron 1 of 17)	1	240931554	241307868	376315	2	6000	uc010pyh.2	-22401	ENSG00000182901	RGS7	regulator of G protein signaling 7
chr1	241829761	241830395	635	*	MACS_peak_2140	90.69	Intron (uc001hzg.2/128025, intron 2 of 26)	1	241815580	241965434	149855	1	128025	uc001hzg.2	14181	ENSG00000162843	WDR64	WD repeat domain 64
chr1	242388059	242389240	1182	*	MACS_peak_2141	137.64	Intron (uc001hzl.4/200150, intron 4 of 9)	1	242251689	242612784	361096	2	200150	uc001hzl.4	223544	ENSG00000180287	PLD5	phospholipase D family member 5
chr1	242414593	242415013	421	*	MACS_peak_2142	56.99	Intron (uc001hzl.4/200150, intron 4 of 9)	1	242251689	242612784	361096	2	200150	uc001hzl.4	197771	ENSG00000180287	PLD5	phospholipase D family member 5
chr1	243669121	243669890	770	*	MACS_peak_2145	104.77	Intron (uc001hzz.1/10000, intron 12 of 13)	1	243509478	243509557	80	1	100616343	uc021plt.1	159643	ENSG00000265201	MIR4677	microRNA 4677
chr1	244168491	244169355	865	*	MACS_peak_2146	313.59	Intron (uc001iac.3/339529, intron 4 of 11)	1	244212241	244220780	8540	1	10472	uc031psv.1	-42886	ENSG00000179456	ZBTB18	zinc finger and BTB domain containing 18
chr1	244715627	244716111	485	*	MACS_peak_2149	51.66	Exon (uc001ial.3/257044, exon 9 of 21)	1	244624673	244803662	178990	1	257044	uc010pyn.2	90954	ENSG00000179397	CATSPERE	catsper channel auxiliary subunit epsilon
chr1	244815945	244816718	774	*	MACS_peak_2150	55.5	Promoter (<=1kb)	1	244816352	244872334	55983	1	51029	uc001iao.3	0	ENSG00000121644	DESI2	desumoylating isopeptidase 2
chr1	245259705	245260588	884	*	MACS_peak_2151	114.8	Intron (uc001ibd.2/84288, intron 7 of 7)	1	245318287	245809683	491397	1	55083	uc010pyq.1	-57699	ENSG00000162849	KIF26B	kinesin family member 26B
chr1	245316549	245317522	974	*	MACS_peak_2152	60.98	Promoter (<=1kb)	1	245318287	245809683	491397	1	55083	uc010pyq.1	-765	ENSG00000162849	KIF26B	kinesin family member 26B
chr1	245441975	245442695	721	*	MACS_peak_2153	51.35	Intron (uc010pyq.1/55083, intron 2 of 9)	1	245516980	245535019	18040	1	55083	uc010pyr.2	-74285	ENSG00000162849	KIF26B	kinesin family member 26B
chr1	245465297	245465939	643	*	MACS_peak_2154	64.26	Intron (uc010pyq.1/55083, intron 2 of 9)	1	245516980	245535019	18040	1	55083	uc010pyr.2	-51041	ENSG00000162849	KIF26B	kinesin family member 26B
chr1	245573344	245573932	589	*	MACS_peak_2155	89.61	Intron (uc010pyq.1/55083, intron 3 of 9)	1	245516980	245535019	18040	1	55083	uc010pyr.2	56364	ENSG00000162849	KIF26B	kinesin family member 26B
chr1	245675657	245676233	577	*	MACS_peak_2156	76.35	Promoter (1-2kb)	1	245674304	245852109	177806	1	55083	uc001ibg.1	1353	ENSG00000162849	KIF26B	kinesin family member 26B
chr1	245747018	245747945	928	*	MACS_peak_2157	243.74	Intron (uc010pyq.1/55083, intron 5 of 9)	1	245809394	245852109	42716	1	55083	uc001ibh.1	-61449	ENSG00000162849	KIF26B	kinesin family member 26B
chr1	245855062	245855707	646	*	MACS_peak_2158	93.87	Intron (uc001ibf.1/55083, intron 12 of 14)	1	245809394	245852109	42716	1	55083	uc001ibh.1	45668	ENSG00000162849	KIF26B	kinesin family member 26B
chr1	246007742	246008288	547	*	MACS_peak_2160	59.25	Intron (uc001ibj.3/64754, intron 5 of 6)	1	245912642	246094125	181484	2	64754	uc001ibj.3	85837	ENSG00000185420	SMYD3	SET and MYND domain containing 3
chr1	246057858	246058680	823	*	MACS_peak_2161	51.41	Intron (uc001ibj.3/64754, intron 3 of 6)	1	245912642	246094125	181484	2	64754	uc001ibj.3	35445	ENSG00000185420	SMYD3	SET and MYND domain containing 3
chr1	246206446	246207270	825	*	MACS_peak_2162	67.26	Intron (uc001ibk.3/64754, intron 5 of 11)	1	245912642	246094125	181484	2	64754	uc001ibj.3	-112321	ENSG00000185420	SMYD3	SET and MYND domain containing 3
chr1	246651048	246651502	455	*	MACS_peak_2163	54.05	Intron (uc001ibl.3/64754, intron 1 of 11)	1	245912642	246670644	758003	2	64754	uc001ibl.3	19142	ENSG00000185420	SMYD3	SET and MYND domain containing 3
chr1	246795599	246796434	836	*	MACS_peak_2164	104.44	Intron (uc001ibo.4/163882, intron 4 of 8)	1	246729639	246831884	102246	1	163882	uc001ibp.3	65960	ENSG00000162852	CNST	consortin, connexin sorting protein
chr1	249132170	249133711	1542	*	MACS_peak_2170	57.8	Promoter (<=1kb)	1	249132530	249143714	11185	1	79894	uc001iex.3	0	ENSG00000171161	ZNF672	zinc finger protein 672
chr10	489652	490981	1330	*	MACS_peak_2171	125.83	Intron (uc001ifp.3/22982, intron 3 of 36)	10	428359	460050	31692	2	22982	uc009xhj.1	-29602	ENSG00000151240	DIP2C	disco interacting protein 2 homolog C
chr10	503482	505164	1683	*	MACS_peak_2172	595.37	Intron (uc001ifp.3/22982, intron 3 of 36)	10	468764	531104	62341	2	22982	uc009xhk.1	25940	ENSG00000151240	DIP2C	disco interacting protein 2 homolog C
chr10	521707	522709	1003	*	MACS_peak_2173	137.46	Intron (uc001ifp.3/22982, intron 2 of 36)	10	468764	531104	62341	2	22982	uc009xhk.1	8395	ENSG00000151240	DIP2C	disco interacting protein 2 homolog C
chr10	526916	528799	1884	*	MACS_peak_2174	90.37	Promoter (2-3kb)	10	468764	531104	62341	2	22982	uc009xhk.1	2305	ENSG00000151240	DIP2C	disco interacting protein 2 homolog C
chr10	536758	537534	777	*	MACS_peak_2175	80.99	Intron (uc001ifp.3/22982, intron 1 of 36)	10	468764	531104	62341	2	22982	uc009xhk.1	-5654	ENSG00000151240	DIP2C	disco interacting protein 2 homolog C
chr10	593090	594827	1738	*	MACS_peak_2176	175.71	Intron (uc001ifp.3/22982, intron 1 of 36)	10	468764	531104	62341	2	22982	uc009xhk.1	-61986	ENSG00000151240	DIP2C	disco interacting protein 2 homolog C
chr10	603790	604461	672	*	MACS_peak_2177	96.15	Intron (uc001ifp.3/22982, intron 1 of 36)	10	468764	531104	62341	2	22982	uc009xhk.1	-72686	ENSG00000151240	DIP2C	disco interacting protein 2 homolog C
chr10	652861	654271	1411	*	MACS_peak_2178	69.79	Intron (uc001ifp.3/22982, intron 1 of 36)	10	687629	687718	90	2	100847086	uc010qaa.2	33447	ENSG00000263511	MIR5699	microRNA 5699
chr10	660440	662438	1999	*	MACS_peak_2179	149.29	Intron (uc001ifp.3/22982, intron 1 of 36)	10	687629	687718	90	2	100847086	uc010qaa.2	25280	ENSG00000263511	MIR5699	microRNA 5699
chr10	666908	668154	1247	*	MACS_peak_2180	62.63	Intron (uc001ifp.3/22982, intron 1 of 36)	10	687629	687718	90	2	100847086	uc010qaa.2	19564	ENSG00000263511	MIR5699	microRNA 5699
chr10	670237	671778	1542	*	MACS_peak_2181	80	Intron (uc001ifp.3/22982, intron 1 of 36)	10	687629	687718	90	2	100847086	uc010qaa.2	15940	ENSG00000263511	MIR5699	microRNA 5699
chr10	672070	672997	928	*	MACS_peak_2182	191.95	Intron (uc001ifp.3/22982, intron 1 of 36)	10	687629	687718	90	2	100847086	uc010qaa.2	14721	ENSG00000263511	MIR5699	microRNA 5699
chr10	709527	710568	1042	*	MACS_peak_2183	50.19	3' UTR	10	696017	711109	15093	1	414235	uc001ifr.3	13510	ENSG00000180525	PRR26	proline rich 26
chr10	711176	712096	921	*	MACS_peak_2184	490.08	Intron (uc001ifp.3/22982, intron 1 of 36)	10	696017	711109	15093	1	414235	uc001ifr.3	15159	ENSG00000180525	PRR26	proline rich 26
chr10	726763	728477	1715	*	MACS_peak_2185	116.24	Intron (uc001ifp.3/22982, intron 1 of 36)	10	320130	735608	415479	2	22982	uc001ifp.3	7131	ENSG00000151240	DIP2C	disco interacting protein 2 homolog C
chr10	867030	867926	897	*	MACS_peak_2187	76.05	Intron (uc031ptb.1/23185, intron 13 of 17)	10	852854	977645	124792	2	23185	uc031ptb.1	109719	ENSG00000107929	LARP4B	La ribonucleoprotein domain family member 4B
chr10	916063	916707	645	*	MACS_peak_2188	54.77	Intron (uc031ptb.1/23185, intron 3 of 17)	10	852854	977645	124792	2	23185	uc031ptb.1	60938	ENSG00000107929	LARP4B	La ribonucleoprotein domain family member 4B
chr10	1068363	1069015	653	*	MACS_peak_2189	53.1	Promoter (<=1kb)	10	1068577	1090141	21565	1	55853	uc001ifw.3	0	ENSG00000232656	IDI2-AS1	IDI2 antisense RNA 1
chr10	1091792	1092496	705	*	MACS_peak_2190	52.31	Promoter (<=1kb)	10	1085964	1091076	5113	2	3422	uc001ifz.3	-716	ENSG00000067064	IDI1	isopentenyl-diphosphate delta isomerase 1
chr10	1173368	1174067	700	*	MACS_peak_2191	191.53	Intron (uc031ptc.1/22884, intron 13 of 13)	10	1205708	1210612	4905	1	399706	uc010qag.1	-31641	ENSG00000229205	LINC00200	long intergenic non-protein coding RNA 200
chr10	1176267	1177094	828	*	MACS_peak_2192	67.06	3' UTR	10	1205708	1210612	4905	1	399706	uc010qag.1	-28614	ENSG00000229205	LINC00200	long intergenic non-protein coding RNA 200
chr10	1202179	1203130	952	*	MACS_peak_2193	178.36	Promoter (2-3kb)	10	1205708	1210612	4905	1	399706	uc010qag.1	-2578	ENSG00000229205	LINC00200	long intergenic non-protein coding RNA 200
chr10	1274320	1275072	753	*	MACS_peak_2194	88.83	Intron (uc009xhq.3/105, intron 6 of 9)	10	1223253	1246331	23079	2	105	uc001igm.4	-27989	ENSG00000185736	ADARB2	adenosine deaminase, RNA specific B2 (inactive)
chr10	1366134	1366836	703	*	MACS_peak_2195	64.58	Intron (uc009xhq.3/105, intron 3 of 9)	10	1223253	1246331	23079	2	105	uc001igm.4	-119803	ENSG00000185736	ADARB2	adenosine deaminase, RNA specific B2 (inactive)
chr10	1411760	1412637	878	*	MACS_peak_2196	151.58	Intron (uc009xhq.3/105, intron 2 of 9)	10	1568825	1599179	30355	1	642394	uc001ign.3	-156188	ENSG00000205696	ADARB2-AS1	ADARB2 antisense RNA 1
chr10	1458517	1459430	914	*	MACS_peak_2197	84.5	Intron (uc009xhq.3/105, intron 1 of 9)	10	1568825	1599179	30355	1	642394	uc001ign.3	-109395	ENSG00000205696	ADARB2-AS1	ADARB2 antisense RNA 1
chr10	1534249	1535063	815	*	MACS_peak_2198	72.87	Intron (uc009xhq.3/105, intron 1 of 9)	10	1568825	1599179	30355	1	642394	uc001ign.3	-33762	ENSG00000205696	ADARB2-AS1	ADARB2 antisense RNA 1
chr10	1568377	1569154	778	*	MACS_peak_2199	102.24	Promoter (<=1kb)	10	1568825	1599179	30355	1	642394	uc001ign.3	0	ENSG00000205696	ADARB2-AS1	ADARB2 antisense RNA 1
chr10	1580331	1581270	940	*	MACS_peak_2200	107.43	Intron (uc001ign.3/642394, intron 1 of 1)	10	1568825	1599179	30355	1	642394	uc001ign.3	11506	ENSG00000205696	ADARB2-AS1	ADARB2 antisense RNA 1
chr10	1590516	1591396	881	*	MACS_peak_2201	414.25	Intron (uc001ign.3/642394, intron 1 of 1)	10	1568825	1599179	30355	1	642394	uc001ign.3	21691	ENSG00000205696	ADARB2-AS1	ADARB2 antisense RNA 1
chr10	1605007	1605732	726	*	MACS_peak_2202	58.49	Intron (uc009xhq.3/105, intron 1 of 9)	10	1568825	1599179	30355	1	642394	uc001ign.3	36182	ENSG00000205696	ADARB2-AS1	ADARB2 antisense RNA 1
chr10	1710063	1710954	892	*	MACS_peak_2203	55.89	Intron (uc009xhq.3/105, intron 1 of 9)	10	1223253	1779670	556418	2	105	uc009xhq.3	68716	ENSG00000185736	ADARB2	adenosine deaminase, RNA specific B2 (inactive)
chr10	2357188	2357938	751	*	MACS_peak_2209	367.32	Promoter (<=1kb)	10	2342513	2357268	14756	2	399708	uc021pmj.1	0	NA	LINC00701	long intergenic non-protein coding RNA 701
chr10	3440953	3442177	1225	*	MACS_peak_2219	57	Intron (uc001igy.1/uc001igy.1, intron 1 of 1)	10	3180427	3215033	34607	2	10531	uc010qai.2	-225920	ENSG00000107959	PITRM1	pitrilysin metallopeptidase 1
chr10	3558105	3559561	1457	*	MACS_peak_2220	84.61	Intron (uc001igy.1/uc001igy.1, intron 1 of 1)	10	3818188	3827473	9286	2	1316	uc001iha.3	267912	ENSG00000067082	KLF6	Kruppel like factor 6
chr10	3822695	3823535	841	*	MACS_peak_2221	436.17	3' UTR	10	3818188	3827473	9286	2	1316	uc001iha.3	3938	ENSG00000067082	KLF6	Kruppel like factor 6
chr10	4705135	4705960	826	*	MACS_peak_2224	52.51	Intron (uc001ihe.4/100216001, intron 1 of 3)	10	4698348	4704606	6259	1	338588	uc001ihg.3	6787	NA	LINC00705	long intergenic non-protein coding RNA 705
chr10	4888725	4889459	735	*	MACS_peak_2226	87.16	Exon (uc001ihh.2/83592, exon 7 of 8)	10	4868369	4890251	21883	1	83592	uc031ptd.1	20356	ENSG00000165568	AKR1E2	aldo-keto reductase family 1 member E2
chr10	5088730	5089446	717	*	MACS_peak_2227	66.87	Promoter (1-2kb)	10	5090958	5149878	58921	1	8644	uc021pml.1	-1512	ENSG00000196139	AKR1C3	aldo-keto reductase family 1 member C3
chr10	5971180	5972071	892	*	MACS_peak_2232	249.25	Intron (uc001iir.4/84893, intron 20 of 21)	10	5936349	5979558	43210	1	84893	uc001iit.4	34831	ENSG00000134452	FBXO18	F-box protein, helicase, 18
chr10	6205405	6206170	766	*	MACS_peak_2234	114.18	Intron (uc001ijd.3/5209, intron 1 of 14)	10	6194171	6194225	55	2	100628560	uc021pmr.1	-11180	ENSG00000283634	MIR3155B	microRNA 3155b
chr10	6245865	6247332	1468	*	MACS_peak_2235	86.69	Promoter (1-2kb)	10	6244840	6277507	32668	1	5209	uc001ijf.3	1025	ENSG00000170525	PFKFB3	6-phosphofructo-2-kinase/fructose-2,6-biphosphatase 3
chr10	6260582	6261779	1198	*	MACS_peak_2236	189.75	Exon (uc001ijd.3/5209, exon 7 of 15)	10	6266112	6277507	11396	1	5209	uc001ijg.3	-4333	ENSG00000170525	PFKFB3	6-phosphofructo-2-kinase/fructose-2,6-biphosphatase 3
chr10	6316978	6317778	801	*	MACS_peak_2237	93.3	Promoter (1-2kb)	10	6319650	6377937	58288	1	399715	uc021pms.1	-1872	ENSG00000215244	LOC399715	uncharacterized LOC399715
chr10	6376787	6377539	753	*	MACS_peak_2238	163.67	Exon (uc021pms.1/399715, exon 7 of 7)	10	6319650	6377937	58288	1	399715	uc021pms.1	57137	ENSG00000215244	LOC399715	uncharacterized LOC399715
chr10	6838474	6839303	830	*	MACS_peak_2240	59.46	Intron (uc001ijm.3/100507127, intron 2 of 4)	10	6821560	6884868	63309	1	100507127	uc001ijm.3	16914	ENSG00000238266	LINC00707	long intergenic non-protein coding RNA 707
chr10	7235555	7236419	865	*	MACS_peak_2244	64.39	Intron (uc009xio.2/57713, intron 15 of 20)	10	7200586	7451303	250718	2	57713	uc009xio.2	214884	ENSG00000198879	SFMBT2	Scm like with four mbt domains 2
chr10	7339850	7340599	750	*	MACS_peak_2245	61.74	Intron (uc009xio.2/57713, intron 4 of 20)	10	7200586	7451303	250718	2	57713	uc009xio.2	110704	ENSG00000198879	SFMBT2	Scm like with four mbt domains 2
chr10	7426888	7427649	762	*	MACS_peak_2246	173.02	Intron (uc009xio.2/57713, intron 1 of 20)	10	7200586	7451303	250718	2	57713	uc009xio.2	23654	ENSG00000198879	SFMBT2	Scm like with four mbt domains 2
chr10	7436064	7436839	776	*	MACS_peak_2247	70.6	Intron (uc009xio.2/57713, intron 1 of 20)	10	7200586	7451303	250718	2	57713	uc009xio.2	14464	ENSG00000198879	SFMBT2	Scm like with four mbt domains 2
chr10	7670124	7671071	948	*	MACS_peak_2248	62.56	Intron (uc021pmv.1/80760, intron 5 of 14)	10	7601232	7661636	60405	2	80760	uc021pmu.1	-8488	ENSG00000123243	ITIH5	inter-alpha-trypsin inhibitor heavy chain family member 5
chr10	7696963	7697595	633	*	MACS_peak_2249	192.2	Exon (uc021pmv.1/80760, exon 2 of 15)	10	7601232	7708961	107730	2	80760	uc021pmv.1	11366	ENSG00000123243	ITIH5	inter-alpha-trypsin inhibitor heavy chain family member 5
chr10	7698982	7700040	1059	*	MACS_peak_2250	71.54	Intron (uc021pmv.1/80760, intron 1 of 14)	10	7601232	7708961	107730	2	80760	uc021pmv.1	8921	ENSG00000123243	ITIH5	inter-alpha-trypsin inhibitor heavy chain family member 5
chr10	7760846	7761655	810	*	MACS_peak_2251	76.1	Intron (uc001ijs.3/3698, intron 6 of 20)	10	7745236	7791483	46248	1	3698	uc001ijs.3	15610	ENSG00000151655	ITIH2	inter-alpha-trypsin inhibitor heavy chain 2
chr10	7808176	7809155	980	*	MACS_peak_2252	95.66	Intron (uc001ijt.3/22944, intron 8 of 12)	10	7792925	7829990	37066	2	22944	uc001ijt.3	20835	ENSG00000151657	KIN	Kin17 DNA and RNA binding protein
chr10	8030980	8031412	433	*	MACS_peak_2253	74.18	Intron (uc010qbd.3/83860, intron 4 of 6)	10	8092413	8095447	3035	2	399717	uc001ijx.1	64035	ENSG00000197308	GATA3-AS1	GATA3 antisense RNA 1
chr10	11053153	11054038	886	*	MACS_peak_2269	56.23	Intron (uc010qbi.2/10659, intron 1 of 7)	10	11059893	11374605	314713	1	10659	uc001ikk.2	-5855	ENSG00000048740	CELF2	CUGBP Elav-like family member 2
chr10	11197857	11198659	803	*	MACS_peak_2270	61.12	Intron (uc010qbi.2/10659, intron 1 of 7)	10	11206993	11330515	123523	1	10659	uc010qbk.1	-8334	ENSG00000048740	CELF2	CUGBP Elav-like family member 2
chr10	11206651	11207376	726	*	MACS_peak_2271	51.05	Promoter (<=1kb)	10	11206993	11330515	123523	1	10659	uc010qbk.1	0	ENSG00000048740	CELF2	CUGBP Elav-like family member 2
chr10	11252226	11253170	945	*	MACS_peak_2272	98.35	Intron (uc010qbi.2/10659, intron 2 of 7)	10	11207449	11374605	167157	1	10659	uc010qbp.1	44777	ENSG00000048740	CELF2	CUGBP Elav-like family member 2
chr10	11378531	11380220	1690	*	MACS_peak_2273	55.94	3' UTR	10	11207449	11374605	167157	1	10659	uc010qbp.1	171082	ENSG00000048740	CELF2	CUGBP Elav-like family member 2
chr10	11580649	11581460	812	*	MACS_peak_2275	156.62	Intron (uc001ikt.3/9712, intron 2 of 14)	10	11502509	11574274	71766	2	9712	uc001iks.1	-6375	ENSG00000148429	USP6NL	USP6 N-terminal like
chr10	11916435	11918965	2531	*	MACS_peak_2278	285.92	Intron (uc001iky.2/219731, intron 2 of 5)	10	11891607	11936709	45103	2	219731	uc001iky.2	17744	ENSG00000225778	PROSER2-AS1	PROSER2 antisense RNA 1
chr10	12417955	12418799	845	*	MACS_peak_2280	337.11	Intron (uc001iln.3/57118, intron 1 of 9)	10	12391583	12871733	480151	1	57118	uc001ilo.3	26372	ENSG00000183049	CAMK1D	calcium/calmodulin dependent protein kinase ID
chr10	12591281	12592161	881	*	MACS_peak_2281	139.31	Intron (uc001iln.3/57118, intron 1 of 9)	10	12620752	12620822	71	1	100616151	uc021pmz.1	-28591	ENSG00000263584	MIR4480	microRNA 4480
chr10	12595547	12596286	740	*	MACS_peak_2282	81.45	Intron (uc001iln.3/57118, intron 2 of 9)	10	12620752	12620822	71	1	100616151	uc021pmz.1	-24466	ENSG00000263584	MIR4480	microRNA 4480
chr10	12737207	12737807	601	*	MACS_peak_2283	84.93	Intron (uc001iln.3/57118, intron 3 of 9)	10	12620752	12620822	71	1	100616151	uc021pmz.1	116455	ENSG00000263584	MIR4480	microRNA 4480
chr10	12762466	12763465	1000	*	MACS_peak_2284	50.36	Intron (uc001iln.3/57118, intron 3 of 9)	10	12875133	12877545	2413	1	283070	uc001ilp.4	-111668	NA	NA	NA
chr10	12814057	12814937	881	*	MACS_peak_2285	86.93	Intron (uc001iln.3/57118, intron 5 of 9)	10	12875133	12877545	2413	1	283070	uc001ilp.4	-60196	NA	NA	NA
chr10	12939025	12939998	974	*	MACS_peak_2287	517.37	3' UTR	10	12875133	12877545	2413	1	283070	uc001ilp.4	63892	NA	NA	NA
chr10	13016480	13017479	1000	*	MACS_peak_2288	436.8	Intron (uc001ilq.1/83643, intron 2 of 2)	10	12938625	13043704	105080	2	83643	uc001ilq.1	26225	ENSG00000151468	CCDC3	coiled-coil domain containing 3
chr10	13061064	13061982	919	*	MACS_peak_2289	199.18	Intron (uc009xjb.1/83643, intron 2 of 2)	10	12938625	13043704	105080	2	83643	uc001ilq.1	-17360	ENSG00000151468	CCDC3	coiled-coil domain containing 3
chr10	13089545	13090305	761	*	MACS_peak_2290	114.68	Promoter (1-2kb)	10	12938625	13091941	153317	2	83643	uc009xjb.1	1636	ENSG00000151468	CCDC3	coiled-coil domain containing 3
chr10	13114400	13114916	517	*	MACS_peak_2291	66.03	Intron (uc001ilr.2/83643, intron 4 of 6)	10	12938625	13091941	153317	2	83643	uc009xjb.1	-22459	ENSG00000151468	CCDC3	coiled-coil domain containing 3
chr10	13147032	13147866	835	*	MACS_peak_2292	74.32	Intron (uc001ilu.1/10133, intron 1 of 15)	10	13142082	13180276	38195	1	10133	uc010qbr.1	4950	ENSG00000123240	OPTN	optineurin
chr10	13495933	13496601	669	*	MACS_peak_2293	87.51	Intron (uc001iml.2/222389, intron 1 of 3)	10	13480484	13502080	21597	2	222389	uc001iml.2	5479	ENSG00000165626	BEND7	BEN domain containing 7
chr10	13876337	13877330	994	*	MACS_peak_2294	94.6	Intron (uc001ims.3/55691, intron 3 of 24)	10	13708097	14014369	306273	2	55691	uc001imt.1	137039	ENSG00000151474	FRMD4A	FERM domain containing 4A
chr10	14001492	14002195	704	*	MACS_peak_2295	84.44	Intron (uc001ims.3/55691, intron 2 of 24)	10	13708097	14014369	306273	2	55691	uc001imt.1	12174	ENSG00000151474	FRMD4A	FERM domain containing 4A
chr10	14002324	14003043	720	*	MACS_peak_2296	168.42	Intron (uc001ims.3/55691, intron 2 of 24)	10	13708097	14014369	306273	2	55691	uc001imt.1	11326	ENSG00000151474	FRMD4A	FERM domain containing 4A
chr10	14050111	14051035	925	*	MACS_peak_2297	595.43	Promoter (<=1kb)	10	13734169	14050160	315992	2	55691	uc001imu.1	0	ENSG00000151474	FRMD4A	FERM domain containing 4A
chr10	14057808	14058680	873	*	MACS_peak_2298	79.51	Intron (uc001ims.3/55691, intron 2 of 24)	10	13734169	14050160	315992	2	55691	uc001imu.1	-7648	ENSG00000151474	FRMD4A	FERM domain containing 4A
chr10	14059589	14060233	645	*	MACS_peak_2299	130.64	Intron (uc001ims.3/55691, intron 2 of 24)	10	13734169	14050160	315992	2	55691	uc001imu.1	-9429	ENSG00000151474	FRMD4A	FERM domain containing 4A
chr10	14103371	14104140	770	*	MACS_peak_2300	55.74	Intron (uc001ims.3/55691, intron 2 of 24)	10	13734169	14050160	315992	2	55691	uc001imu.1	-53211	ENSG00000151474	FRMD4A	FERM domain containing 4A
chr10	14314143	14314747	605	*	MACS_peak_2301	59.46	Intron (uc001ims.3/55691, intron 2 of 24)	10	13685706	14372866	687161	2	55691	uc001ims.3	58119	ENSG00000151474	FRMD4A	FERM domain containing 4A
chr10	14590228	14591113	886	*	MACS_peak_2302	135.55	Promoter (<=1kb)	10	14560559	14590627	30069	2	83641	uc001imx.1	0	ENSG00000065809	FAM107B	family with sequence similarity 107 member B
chr10	14919926	14921150	1225	*	MACS_peak_2303	64.08	Promoter (<=1kb)	10	14920782	14946304	25523	1	79723	uc001ing.3	0	ENSG00000152455	SUV39H2	suppressor of variegation 3-9 homolog 2
chr10	14978618	14979275	658	*	MACS_peak_2304	106.76	Promoter (1-2kb)	10	14964980	14976774	11795	2	64421	uc009xjj.1	-1844	ENSG00000152457	DCLRE1C	DNA cross-link repair 1C
chr10	15015510	15016339	830	*	MACS_peak_2305	74.67	Intron (uc021pni.1/64421, intron 1 of 9)	10	15001438	15014850	13413	1	644890	uc009xjk.1	14072	ENSG00000197889	MEIG1	meiosis/spermiogenesis associated 1
chr10	15192097	15192738	642	*	MACS_peak_2306	148.06	Intron (uc010qbz.1/9397, intron 2 of 11)	10	15196721	15197346	626	2	100192204	uc010qca.1	4608	ENSG00000206448	PPIAP30	peptidylprolyl isomerase A pseudogene 30
chr10	15293561	15294350	790	*	MACS_peak_2307	324.64	Intron (uc001iob.3/221061, intron 4 of 7)	10	15147771	15210695	62925	2	9397	uc001ioa.1	-82866	ENSG00000152465	NMT2	N-myristoyltransferase 2
chr10	15341964	15342758	795	*	MACS_peak_2308	57.13	Intron (uc001iob.3/221061, intron 1 of 7)	10	15253644	15413058	159415	2	221061	uc001iob.3	70300	ENSG00000148468	FAM171A1	family with sequence similarity 171 member A1
chr10	15566167	15566907	741	*	MACS_peak_2309	81.37	Intron (uc001ioc.1/8516, intron 28 of 29)	10	15253644	15413058	159415	2	221061	uc001iob.3	-153109	ENSG00000148468	FAM171A1	family with sequence similarity 171 member A1
chr10	15674518	15675310	793	*	MACS_peak_2310	54.38	Intron (uc001ioc.1/8516, intron 13 of 29)	10	15559088	15761770	202683	2	8516	uc001ioc.1	86460	ENSG00000077943	ITGA8	integrin subunit alpha 8
chr10	16533662	16534255	594	*	MACS_peak_2314	76.7	Intron (uc001iog.2/9317, intron 4 of 5)	10	16555742	16564004	8263	2	389941	uc001ioj.1	29749	ENSG00000165985	C1QL3	complement C1q like 3
chr10	16705036	16706101	1066	*	MACS_peak_2315	105.36	Intron (uc001iok.3/6251, intron 7 of 7)	10	16555742	16564004	8263	2	389941	uc001ioj.1	-141032	ENSG00000165985	C1QL3	complement C1q like 3
chr10	16710832	16711700	869	*	MACS_peak_2316	55.43	Intron (uc001iok.3/6251, intron 7 of 7)	10	16555742	16564004	8263	2	389941	uc001ioj.1	-146828	ENSG00000165985	C1QL3	complement C1q like 3
chr10	17007005	17007646	642	*	MACS_peak_2317	371.52	Intron (uc001ioo.3/8029, intron 31 of 66)	10	16911635	16949747	38113	2	8029	uc009xjr.1	-57258	ENSG00000107611	CUBN	cubilin
chr10	17029730	17030514	785	*	MACS_peak_2318	62.26	Intron (uc001ioo.3/8029, intron 29 of 66)	10	16911635	16949747	38113	2	8029	uc009xjr.1	-79983	ENSG00000107611	CUBN	cubilin
chr10	17270378	17272085	1708	*	MACS_peak_2319	64.5	Promoter (<=1kb)	10	17270258	17279592	9335	1	7431	uc001iou.2	120	ENSG00000026025	VIM	vimentin
chr10	17381950	17382626	677	*	MACS_peak_2321	61.79	Intron (uc001ipd.3/338596, intron 4 of 7)	10	17428935	17450285	21351	1	100128098	uc001ipe.3	-46309	ENSG00000204832	ST8SIA6-AS1	ST8SIA6 antisense RNA 1
chr10	17465515	17466380	866	*	MACS_peak_2322	72.2	Intron (uc001ipd.3/338596, intron 2 of 7)	10	17362676	17496254	133579	2	338596	uc001ipd.3	29874	ENSG00000148488	ST8SIA6	ST8 alpha-N-acetyl-neuraminide alpha-2,8-sialyltransferase 6
chr10	19940611	19941476	866	*	MACS_peak_2326	50.36	Intron (uc010qcr.1/uc010qcr.1, intron 1 of 4)	10	20105372	20569115	463744	1	84898	uc001iqg.1	-163896	ENSG00000120594	PLXDC2	plexin domain containing 2
chr10	19964757	19965384	628	*	MACS_peak_2327	149.98	Intron (uc010qcr.1/uc010qcr.1, intron 1 of 4)	10	20105372	20569115	463744	1	84898	uc001iqg.1	-139988	ENSG00000120594	PLXDC2	plexin domain containing 2
chr10	20004494	20005084	591	*	MACS_peak_2328	52.04	Intron (uc010qcr.1/uc010qcr.1, intron 3 of 4)	10	20105372	20569115	463744	1	84898	uc001iqg.1	-100288	ENSG00000120594	PLXDC2	plexin domain containing 2
chr10	20160313	20160743	431	*	MACS_peak_2329	84.06	Intron (uc001iqg.1/84898, intron 1 of 13)	10	20105372	20569115	463744	1	84898	uc001iqh.1	54941	ENSG00000120594	PLXDC2	plexin domain containing 2
chr10	21282369	21283026	658	*	MACS_peak_2331	94.6	Intron (uc001iqk.3/10529, intron 3 of 6)	10	21068903	21186531	117629	2	10529	uc001iqj.3	-95838	ENSG00000078114	NEBL	nebulette
chr10	21960769	21961616	848	*	MACS_peak_2335	51.66	Promoter (<=1kb)	10	21962570	22032559	69990	1	8028	uc001irb.3	-954	ENSG00000078403	MLLT10	MLLT10, histone lysine methyltransferase DOT1L cofactor
chr10	22604896	22605659	764	*	MACS_peak_2338	173.8	Promoter (<=1kb)	10	22605312	22620414	15103	1	100532731	uc009xkg.3	0	ENSG00000269897	COMMD3-BMI1	COMMD3-BMI1 readthrough
chr10	22904778	22905618	841	*	MACS_peak_2339	59.46	Intron (uc001irl.4/5305, intron 1 of 9)	10	22823766	22880710	56945	2	5305	uc010qcu.2	-24068	ENSG00000150867	PIP4K2A	phosphatidylinositol-5-phosphate 4-kinase type 2 alpha
chr10	22909003	22910068	1066	*	MACS_peak_2340	55.33	Intron (uc001irl.4/5305, intron 1 of 9)	10	22823766	22880710	56945	2	5305	uc010qcu.2	-28293	ENSG00000150867	PIP4K2A	phosphatidylinositol-5-phosphate 4-kinase type 2 alpha
chr10	22912180	22913197	1018	*	MACS_peak_2341	185.73	Intron (uc001irl.4/5305, intron 1 of 9)	10	22823766	22880710	56945	2	5305	uc010qcu.2	-31470	ENSG00000150867	PIP4K2A	phosphatidylinositol-5-phosphate 4-kinase type 2 alpha
chr10	22920461	22921276	816	*	MACS_peak_2342	100.6	Intron (uc001irl.4/5305, intron 1 of 9)	10	22823766	22880710	56945	2	5305	uc010qcu.2	-39751	ENSG00000150867	PIP4K2A	phosphatidylinositol-5-phosphate 4-kinase type 2 alpha
chr10	23326248	23326909	662	*	MACS_peak_2346	110.2	3' UTR	10	23384427	23410942	26516	1	22921	uc001iro.3	-57518	ENSG00000148450	MSRB2	methionine sulfoxide reductase B2
chr10	23409509	23410542	1034	*	MACS_peak_2348	179.31	3' UTR	10	23384427	23410942	26516	1	22921	uc001iro.3	25082	ENSG00000148450	MSRB2	methionine sulfoxide reductase B2
chr10	23617042	23617448	407	*	MACS_peak_2350	118.56	Intron (uc010qcx.2/256815, intron 2 of 4)	10	23605520	23633772	28253	2	256815	uc010qcx.2	16324	ENSG00000179133	C10orf67	chromosome 10 open reading frame 67
chr10	23727313	23728575	1263	*	MACS_peak_2352	183.08	Promoter (<=1kb)	10	23728198	23731310	3113	1	220213	uc001irr.2	0	ENSG00000165312	OTUD1	OTU deubiquitinase 1
chr10	24193181	24193812	632	*	MACS_peak_2353	63.2	Intron (uc001irs.3/56243, intron 1 of 18)	10	23983675	24836772	853098	1	56243	uc001irs.3	209506	ENSG00000120549	KIAA1217	KIAA1217
chr10	24215699	24216349	651	*	MACS_peak_2354	245.95	Intron (uc001irs.3/56243, intron 1 of 18)	10	23983675	24836772	853098	1	56243	uc001irs.3	232024	ENSG00000120549	KIAA1217	KIAA1217
chr10	24219321	24219987	667	*	MACS_peak_2355	87.7	Intron (uc001irs.3/56243, intron 1 of 18)	10	23983675	24836772	853098	1	56243	uc001irs.3	235646	ENSG00000120549	KIAA1217	KIAA1217
chr10	24274452	24275135	684	*	MACS_peak_2356	77.6	Intron (uc001irs.3/56243, intron 1 of 18)	10	24497720	24836772	339053	1	56243	uc001irt.4	-222585	ENSG00000120549	KIAA1217	KIAA1217
chr10	24324099	24324990	892	*	MACS_peak_2357	155.09	Intron (uc001irs.3/56243, intron 2 of 18)	10	24497720	24836772	339053	1	56243	uc001irt.4	-172730	ENSG00000120549	KIAA1217	KIAA1217
chr10	24328928	24329368	441	*	MACS_peak_2358	64.09	Intron (uc001irs.3/56243, intron 2 of 18)	10	24497720	24836772	339053	1	56243	uc001irt.4	-168352	ENSG00000120549	KIAA1217	KIAA1217
chr10	24434105	24434972	868	*	MACS_peak_2359	57.24	Intron (uc001irs.3/56243, intron 2 of 18)	10	24497720	24836772	339053	1	56243	uc001irt.4	-62748	ENSG00000120549	KIAA1217	KIAA1217
chr10	24599422	24600615	1194	*	MACS_peak_2360	128.21	Intron (uc001irs.3/56243, intron 3 of 18)	10	24564614	24564710	97	1	693188	uc021poj.1	34808	ENSG00000207930	MIR603	microRNA 603
chr10	24705440	24706013	574	*	MACS_peak_2361	93.53	Intron (uc001irs.3/56243, intron 4 of 18)	10	24738594	24836417	97824	1	56243	uc001irw.3	-32581	ENSG00000120549	KIAA1217	KIAA1217
chr10	25304982	25306343	1362	*	MACS_peak_2363	436.88	Promoter (<=1kb)	10	25270908	25305085	34178	2	219670	uc001isg.2	0	ENSG00000151023	ENKUR	enkurin, TRPC channel interacting protein
chr10	25792348	25793074	727	*	MACS_peak_2367	58.42	Intron (uc001isj.3/57512, intron 5 of 10)	10	25883142	25891157	8016	1	57512	uc001isk.3	-90068	ENSG00000151025	GPR158	G protein-coupled receptor 158
chr10	26516709	26517223	515	*	MACS_peak_2369	93.85	Intron (uc001isp.2/2572, intron 6 of 15)	10	26505236	26593491	88256	1	2572	uc001isq.2	11473	ENSG00000136750	GAD2	glutamate decarboxylase 2
chr10	26845232	26846015	784	*	MACS_peak_2370	78.02	Intron (uc001iss.3/54518, intron 11 of 14)	10	26878794	26883251	4458	1	645528	uc001ist.3	-32779	ENSG00000233261	FAM238A	family with sequence similarity 238 member A (non-protein coding)
chr10	27481222	27481738	517	*	MACS_peak_2372	112.03	Downstream (2-3kb)	10	27443753	27475848	32096	1	84930	uc009xkx.2	37469	ENSG00000120539	MASTL	microtubule associated serine/threonine kinase like
chr10	27528955	27529961	1007	*	MACS_peak_2373	50.03	Promoter (<=1kb)	10	27484143	27529808	45666	2	91452	uc010qdm.3	0	ENSG00000107897	ACBD5	acyl-CoA binding domain containing 5
chr10	27825022	27825709	688	*	MACS_peak_2374	84.47	Intron (uc001itv.4/22931, intron 6 of 6)	10	27793103	27831166	38064	1	22931	uc031pto.1	31919	ENSG00000099246	RAB18	RAB18, member RAS oncogene family
chr10	28363855	28364812	958	*	MACS_peak_2376	66.07	Intron (uc009xkz.1/143098, intron 11 of 15)	10	28101097	28287977	186881	2	55130	uc001itz.3	-75878	ENSG00000169126	ARMC4	armadillo repeat containing 4
chr10	28963699	28964372	674	*	MACS_peak_2379	87.06	Promoter (2-3kb)	10	28966424	28971868	5445	1	25805	uc001iuj.1	-2052	ENSG00000095739	BAMBI	BMP and activin membrane bound inhibitor
chr10	29938366	29939205	840	*	MACS_peak_2387	51.74	Intron (uc001iuu.1/6840, intron 3 of 35)	10	29746277	29923901	177625	2	6840	uc001iut.1	-14465	ENSG00000197321	SVIL	supervillin
chr10	30395775	30396553	779	*	MACS_peak_2391	72.87	Intron (uc001iuz.3/57608, intron 1 of 4)	10	30301729	30404420	102692	2	57608	uc001iuz.3	7867	ENSG00000165757	JCAD	junctional cadherin 5 associated
chr10	30403581	30404260	680	*	MACS_peak_2392	371.88	Promoter (<=1kb)	10	30301729	30404420	102692	2	57608	uc001iuz.3	160	ENSG00000165757	JCAD	junctional cadherin 5 associated
chr10	30643332	30644269	938	*	MACS_peak_2394	180.78	Intron (uc001ivb.4/55149, intron 9 of 16)	10	30628582	30638267	9686	2	55149	uc001ivc.2	-5065	ENSG00000107951	MTPAP	mitochondrial poly(A) polymerase
chr10	30994040	30994908	869	*	MACS_peak_2396	76.65	Intron (uc010qdx.1/uc010qdx.1, intron 7 of 9)	10	30900708	30918647	17940	2	119180	uc001ivk.3	-75393	ENSG00000151033	LYZL2	lysozyme like 2
chr10	31269653	31270551	899	*	MACS_peak_2397	119.38	Intron (uc001ivn.3/220929, intron 2 of 7)	10	31133565	31288446	154882	2	220929	uc001ivn.3	17895	ENSG00000183621	ZNF438	zinc finger protein 438
chr10	31288158	31288682	525	*	MACS_peak_2398	74.16	Promoter (<=1kb)	10	31133565	31288446	154882	2	220929	uc001ivn.3	0	ENSG00000183621	ZNF438	zinc finger protein 438
chr10	31800678	31801451	774	*	MACS_peak_2402	135.89	Intron (uc001ivr.4/6935, intron 9 of 12)	10	31610064	31818742	208679	1	6935	uc009xlp.3	190614	ENSG00000148516	ZEB1	zinc finger E-box binding homeobox 1
chr10	31811486	31812421	936	*	MACS_peak_2403	390.1	Intron (uc001ivr.4/6935, intron 11 of 12)	10	31610064	31818742	208679	1	6935	uc009xlp.3	201422	ENSG00000148516	ZEB1	zinc finger E-box binding homeobox 1
chr10	32091956	32092425	470	*	MACS_peak_2405	52.84	Downstream (1-2kb)	10	32094326	32097479	3154	2	94134	uc001ivw.2	5054	ENSG00000165322	ARHGAP12	Rho GTPase activating protein 12
chr10	32217334	32218599	1266	*	MACS_peak_2406	221.8	Promoter (<=1kb)	10	32094326	32217804	123479	2	94134	uc001ivz.2	0	ENSG00000165322	ARHGAP12	Rho GTPase activating protein 12
chr10	32339083	32339730	648	*	MACS_peak_2408	117.36	Intron (uc001iwe.4/3799, intron 1 of 25)	10	32297938	32345371	47434	2	3799	uc001iwe.4	5641	ENSG00000170759	KIF5B	kinesin family member 5B
chr10	32634868	32636457	1590	*	MACS_peak_2410	520.92	Promoter (<=1kb)	10	32556644	32636146	79503	2	80314	uc001iwg.2	0	ENSG00000120616	EPC1	enhancer of polycomb homolog 1
chr10	32815408	32816294	887	*	MACS_peak_2411	54.69	Intron (uc001iwj.3/221016, intron 12 of 17)	10	32856598	33165508	308911	1	79741	uc001iwl.1	-40304	ENSG00000216937	CCDC7	coiled-coil domain containing 7
chr10	33573617	33574197	581	*	MACS_peak_2415	60.78	Intron (uc001iwv.4/8829, intron 2 of 15)	10	33466419	33623768	157350	2	8829	uc001iwv.4	49571	ENSG00000099250	NRP1	neuropilin 1
chr10	35453822	35454448	627	*	MACS_peak_2421	91.46	Promoter (2-3kb)	10	35456467	35468775	12309	1	1390	uc031ptx.1	-2019	ENSG00000095794	CREM	cAMP responsive element modulator
chr10	35488446	35488891	446	*	MACS_peak_2422	108.63	Intron (uc001ixy.3/1390, intron 1 of 2)	10	35484830	35501886	17057	1	1390	uc031pud.1	3616	ENSG00000095794	CREM	cAMP responsive element modulator
chr10	38146178	38147131	954	*	MACS_peak_2437	66.64	Promoter (<=1kb)	10	38065454	38146564	81111	2	57209	uc031pue.1	0	ENSG00000198105	ZNF248	zinc finger protein 248
chr10	42852845	42853543	699	*	MACS_peak_2439	68.18	Intron (uc010qey.2/441666, intron 1 of 2)	10	42827314	42863493	36180	2	441666	uc010qey.2	9950	ENSG00000215146	LOC441666	zinc finger protein 91 pseudogene
chr10	42970407	42971840	1434	*	MACS_peak_2440	82	Promoter (<=1kb)	10	42970939	42990785	19847	1	84856	uc001izy.3	0	ENSG00000185904	LINC00839	long intergenic non-protein coding RNA 839
chr10	43186731	43187869	1139	*	MACS_peak_2441	58.13	Exon (uc001jah.1/uc001jah.1, exon 1 of 5)	10	43084555	43133992	49438	2	7582	uc001jag.1	-52739	ENSG00000196693	ZNF33B	zinc finger protein 33B
chr10	43320343	43320895	553	*	MACS_peak_2443	124.03	Intron (uc001jaj.3/9790, intron 21 of 22)	10	43277954	43330385	52432	1	9790	uc001jaj.3	42389	ENSG00000165733	BMS1	BMS1, ribosome biogenesis factor
chr10	43604306	43606181	1876	*	MACS_peak_2452	58.48	Exon (uc001jak.1/5979, exon 6 of 19)	10	43600364	43622952	22589	1	5979	uc010qez.1	3942	ENSG00000165731	RET	ret proto-oncogene
chr10	43616688	43618102	1415	*	MACS_peak_2453	57.6	Exon (uc001jak.1/5979, exon 16 of 19)	10	43633893	43657765	23873	1	55454	uc001jam.2	-15791	ENSG00000169826	CSGALNACT2	chondroitin sulfate N-acetylgalactosaminyltransferase 2
chr10	43691764	43694497	2734	*	MACS_peak_2454	54.01	Exon (uc001jao.1/221002, exon 9 of 13)	10	43689984	43725187	35204	2	221002	uc001jao.1	30690	ENSG00000198915	RASGEF1A	RasGEF domain family member 1A
chr10	43694517	43696620	2104	*	MACS_peak_2455	52.45	Exon (uc001jao.1/221002, exon 5 of 13)	10	43689984	43725187	35204	2	221002	uc001jao.1	28567	ENSG00000198915	RASGEF1A	RasGEF domain family member 1A
chr10	43712762	43715127	2366	*	MACS_peak_2456	56.18	Intron (uc001jao.1/221002, intron 1 of 12)	10	43689984	43725187	35204	2	221002	uc001jao.1	10060	ENSG00000198915	RASGEF1A	RasGEF domain family member 1A
chr10	43891030	43893139	2110	*	MACS_peak_2460	370.12	Promoter (<=1kb)	10	43881065	43892279	11215	2	3185	uc009xmh.1	0	ENSG00000169813	HNRNPF	heterogeneous nuclear ribonucleoprotein F
chr10	43902909	43904095	1187	*	MACS_peak_2461	94.79	Promoter (<=1kb)	10	43881065	43903299	22235	2	3185	uc001jas.2	0	ENSG00000169813	HNRNPF	heterogeneous nuclear ribonucleoprotein F
chr10	43904112	43904865	754	*	MACS_peak_2462	53.1	Promoter (<=1kb)	10	43881065	43904332	23268	2	3185	uc001jat.2	0	ENSG00000169813	HNRNPF	heterogeneous nuclear ribonucleoprotein F
chr10	43931551	43932929	1379	*	MACS_peak_2464	101.54	Promoter (<=1kb)	10	43932574	43978007	45434	1	642819	uc010qfb.1	0	NA	ZNF487	zinc finger protein 487
chr10	44054395	44055314	920	*	MACS_peak_2465	85.85	Intron (uc001jaw.4/8187, intron 1 of 1)	10	44051793	44063907	12115	2	8187	uc001jaw.4	8593	ENSG00000196793	ZNF239	zinc finger protein 239
chr10	44417189	44418175	987	*	MACS_peak_2470	124.29	Intron (uc021ppk.1/283033, intron 2 of 7)	10	44404752	44465355	60604	1	283033	uc021ppk.1	12437	NA	LINC00841	long intergenic non-protein coding RNA 841
chr10	44419671	44420556	886	*	MACS_peak_2471	183.21	Intron (uc021ppk.1/283033, intron 2 of 7)	10	44434451	44439914	5464	1	283033	uc001jbe.1	-13895	NA	LINC00841	long intergenic non-protein coding RNA 841
chr10	44423294	44424381	1088	*	MACS_peak_2472	67.88	Intron (uc021ppk.1/283033, intron 2 of 7)	10	44434451	44439914	5464	1	283033	uc001jbe.1	-10070	NA	LINC00841	long intergenic non-protein coding RNA 841
chr10	44452460	44453914	1455	*	MACS_peak_2473	124.29	Intron (uc021ppk.1/283033, intron 5 of 7)	10	44434451	44439914	5464	1	283033	uc001jbe.1	18009	NA	LINC00841	long intergenic non-protein coding RNA 841
chr10	45419220	45421247	2028	*	MACS_peak_2485	51.6	Intron (uc001jbn.2/643236, intron 1 of 4)	10	45406764	45430642	23879	1	643236	uc009xmm.1	12456	ENSG00000187783	TMEM72	transmembrane protein 72
chr10	45428768	45429672	905	*	MACS_peak_2486	55.53	5' UTR	10	45406764	45430642	23879	1	643236	uc009xmm.1	22004	ENSG00000187783	TMEM72	transmembrane protein 72
chr10	45553633	45554435	803	*	MACS_peak_2487	55.16	Intron (uc001jbx.1/uc001jbx.1, intron 5 of 6)	10	45594924	45603436	8513	2	100133308	uc001jby.3	49001	NA	RSU1P2	Ras suppressor protein 1 pseudogene 2
chr10	45600571	45601228	658	*	MACS_peak_2488	257.28	Promoter (2-3kb)	10	45594924	45603436	8513	2	100133308	uc001jby.3	2208	NA	RSU1P2	Ras suppressor protein 1 pseudogene 2
chr10	45965508	45966239	732	*	MACS_peak_2489	90.64	Intron (uc001jch.2/220972, intron 3 of 7)	10	45952817	45957652	4836	2	220972	uc001jcg.1	-7856	ENSG00000165406	2008-03-01	membrane associated ring-CH-type finger 8
chr10	46089922	46090859	938	*	MACS_peak_2490	645.13	Promoter (<=1kb)	10	45952817	46090354	137538	2	220972	uc001jcj.1	0	ENSG00000165406	2008-03-01	membrane associated ring-CH-type finger 8
chr10	46222332	46223050	719	*	MACS_peak_2491	291.48	Promoter (<=1kb)	10	46222648	46274583	51936	1	253725	uc001jcs.2	0	ENSG00000172661	WASHC2C	WASH complex subunit 2C
chr10	46998733	47006282	7550	*	MACS_peak_2492	83.52	5' UTR	10	46993546	47000568	7023	1	9721	uc001jec.3	5187	ENSG00000204175	GPRIN2	G protein regulated inducer of neurite outgrowth 2
chr10	47125728	47129048	3321	*	MACS_peak_2493	180	Intron (uc001jed.5/653145, intron 2 of 3)	10	47133295	47133836	542	2	728643	uc001jeg.3	4788	ENSG00000213412	HNRNPA1P33	heterogeneous nuclear ribonucleoprotein A1 pseudogene 33
chr10	47140002	47140907	906	*	MACS_peak_2494	164.33	Intron (uc001jed.5/653145, intron 2 of 3)	10	47133295	47133836	542	2	728643	uc001jeg.3	-6166	ENSG00000213412	HNRNPA1P33	heterogeneous nuclear ribonucleoprotein A1 pseudogene 33
chr10	47680046	47681553	1508	*	MACS_peak_2495	64.81	Exon (uc031pux.1/uc031pux.1, exon 15 of 19)	10	47746920	47753182	6263	1	244	uc009xnh.1	-65367	NA	NA	NA
chr10	48358501	48359596	1096	*	MACS_peak_2498	55.67	Intron (uc001jex.3/118738, intron 1 of 1)	10	48355089	48373866	18778	1	118738	uc001jex.3	3412	ENSG00000265763	ZNF488	zinc finger protein 488
chr10	48411935	48413057	1123	*	MACS_peak_2499	62.46	Downstream (<1kb)	10	48413092	48416853	3762	2	2658	uc001jfa.1	3796	ENSG00000263761	GDF2	growth differentiation factor 2
chr10	49703005	49703968	964	*	MACS_peak_2504	158.28	Promoter (1-2kb)	10	49654068	49701692	47625	2	58504	uc001jgs.4	-1313	ENSG00000128805	ARHGAP22	Rho GTPase activating protein 22
chr10	49742689	49744497	1809	*	MACS_peak_2505	143.89	Intron (uc001jgt.4/58504, intron 3 of 9)	10	49654068	49701692	47625	2	58504	uc001jgs.4	-40997	ENSG00000128805	ARHGAP22	Rho GTPase activating protein 22
chr10	49806275	49807763	1489	*	MACS_peak_2506	54.25	Intron (uc001jgt.4/58504, intron 1 of 9)	10	49654068	49813176	159109	2	58504	uc001jgt.4	5413	ENSG00000128805	ARHGAP22	Rho GTPase activating protein 22
chr10	49820784	49821619	836	*	MACS_peak_2507	52.48	Intron (uc010qgm.3/58504, intron 1 of 9)	10	49654068	49813176	159109	2	58504	uc010qgl.3	-7608	ENSG00000128805	ARHGAP22	Rho GTPase activating protein 22
chr10	49947917	49948871	955	*	MACS_peak_2508	494.47	Intron (uc001jha.4/57705, intron 11 of 61)	10	49893518	50191001	297484	1	57705	uc001jha.4	54399	ENSG00000128815	WDFY4	WDFY family member 4
chr10	49951228	49952189	962	*	MACS_peak_2509	180.41	Exon (uc001jha.4/57705, exon 12 of 62)	10	49893518	50191001	297484	1	57705	uc001jha.4	57710	ENSG00000128815	WDFY4	WDFY family member 4
chr10	49976494	49977332	839	*	MACS_peak_2510	66.34	Intron (uc001jha.4/57705, intron 13 of 61)	10	50010783	50032214	21432	1	57705	uc001jhb.1	-33451	ENSG00000128815	WDFY4	WDFY family member 4
chr10	50182574	50183446	873	*	MACS_peak_2511	196.03	3' UTR	10	50193557	50193632	76	2	100422895	uc021ppz.1	10186	ENSG00000264800	MIR4294	microRNA 4294
chr10	50243821	50244402	582	*	MACS_peak_2512	138.29	Intron (uc001jhf.2/196740, intron 7 of 7)	10	50193557	50193632	76	2	100422895	uc021ppz.1	-50189	ENSG00000264800	MIR4294	microRNA 4294
chr10	50253404	50254251	848	*	MACS_peak_2513	110.05	Intron (uc001jhf.2/196740, intron 7 of 7)	10	50193557	50193632	76	2	100422895	uc021ppz.1	-59772	ENSG00000264800	MIR4294	microRNA 4294
chr10	50396013	50396911	899	*	MACS_peak_2514	143	Promoter (<=1kb)	10	50363891	50396407	32517	2	170371	uc001jhn.4	0	ENSG00000204161	C10orf128	chromosome 10 open reading frame 128
chr10	50525923	50526954	1032	*	MACS_peak_2515	99.83	Intron (uc021pqa.2/118461, intron 2 of 2)	10	50507187	50535537	28351	1	118461	uc021pqa.2	18736	ENSG00000177354	C10orf71	chromosome 10 open reading frame 71
chr10	50850544	50851425	882	*	MACS_peak_2518	113.19	Intron (uc001jhv.1/1103, intron 7 of 14)	10	50822350	50901939	79590	1	1103	uc010qgs.1	28194	ENSG00000070748	CHAT	choline O-acetyltransferase
chr10	50887116	50888096	981	*	MACS_peak_2519	323.16	Promoter (<=1kb)	10	50887684	50902948	15265	1	282966	uc001jib.3	0	ENSG00000178645	C10orf53	chromosome 10 open reading frame 53
chr10	50946680	50947660	981	*	MACS_peak_2520	138.47	Intron (uc009xog.3/55753, intron 16 of 21)	10	50942687	50966753	24067	2	55753	uc009xog.3	19093	ENSG00000197444	OGDHL	oxoglutarate dehydrogenase like
chr10	50969350	50970867	1518	*	MACS_peak_2521	318.85	Promoter (<=1kb)	10	50942687	50970425	27739	2	55753	uc001jie.3	0	ENSG00000197444	OGDHL	oxoglutarate dehydrogenase like
chr10	51792687	51793397	711	*	MACS_peak_2523	51.94	Intron (uc001jiz.1/326332, intron 6 of 6)	10	51780942	51827563	46622	2	326332	uc001jiz.1	34166	NA	NA	NA
chr10	51827278	51827954	677	*	MACS_peak_2524	245.21	Promoter (<=1kb)	10	51780942	51827563	46622	2	326332	uc001jiz.1	0	NA	NA	NA
chr10	52383253	52385474	2222	*	MACS_peak_2526	340.68	Promoter (<=1kb)	10	52065345	52383737	318393	2	259230	uc001jje.3	0	ENSG00000198964	SGMS1	sphingomyelin synthase 1
chr10	52751199	52752037	839	*	MACS_peak_2527	54.68	Promoter (<=1kb)	10	52750911	54058110	1307200	1	5592	uc001jjm.3	288	ENSG00000185532	PRKG1	protein kinase, cGMP-dependent, type I
chr10	55603748	55604065	318	*	MACS_peak_2532	97.81	Intron (uc010qhq.2/65217, intron 29 of 34)	10	55568452	56424050	855599	2	65217	uc021pqv.1	819985	ENSG00000150275	PCDH15	protocadherin related 15
chr10	55820337	55821002	666	*	MACS_peak_2533	581.9	Intron (uc010qhq.2/65217, intron 19 of 34)	10	55568452	56424050	855599	2	65217	uc021pqv.1	603048	ENSG00000150275	PCDH15	protocadherin related 15
chr10	56860164	56860815	652	*	MACS_peak_2534	107.39	Intron (uc001jjv.1/65217, intron 3 of 20)	10	55754340	56561051	806712	2	65217	uc001jjw.3	-299113	ENSG00000150275	PCDH15	protocadherin related 15
chr10	56951186	56951749	564	*	MACS_peak_2535	77.31	Intron (uc001jjv.1/65217, intron 2 of 20)	10	55754340	56561051	806712	2	65217	uc001jjw.3	-390135	ENSG00000150275	PCDH15	protocadherin related 15
chr10	57167975	57168618	644	*	MACS_peak_2536	64.18	Intron (uc001jjv.1/65217, intron 2 of 20)	10	57358750	57360487	1738	1	100463289	uc021pra.1	-190132	ENSG00000249860	MTRNR2L5	MT-RNR2-like 5
chr10	60454254	60455052	799	*	MACS_peak_2544	168.17	Intron (uc001jki.1/80114, intron 2 of 20)	10	60474775	60477293	2519	1	728640	uc010qic.2	-19723	NA	FAM133CP	family with sequence similarity 133, member A pseudogene
chr10	60586193	60587213	1021	*	MACS_peak_2545	62.81	Intron (uc001jki.1/80114, intron 20 of 20)	10	60553244	60574074	20831	1	80114	uc001jkj.1	32949	ENSG00000122870	BICC1	BicC family RNA binding protein 1
chr10	61515165	61515797	633	*	MACS_peak_2547	100.04	Promoter (1-2kb)	10	61496748	61513203	16456	2	100507027	uc021pre.1	-1962	ENSG00000227877	MRLN	myoregulin
chr10	61805119	61805900	782	*	MACS_peak_2548	60.07	Intron (uc001jkv.3/288, intron 9 of 10)	10	61827693	61840366	12674	2	288	uc009xpb.1	34466	ENSG00000151150	ANK3	ankyrin 3
chr10	61994674	61995136	463	*	MACS_peak_2549	120.86	Intron (uc001jky.3/288, intron 7 of 43)	10	61898722	61967991	69270	2	288	uc001jlc.1	-26683	ENSG00000151150	ANK3	ankyrin 3
chr10	62543907	62544472	566	*	MACS_peak_2550	53.79	Exon (uc010qii.2/983, exon 3 of 4)	10	62538291	62554610	16320	1	983	uc031pvg.1	5616	ENSG00000170312	CDK1	cyclin dependent kinase 1
chr10	62661459	62662073	615	*	MACS_peak_2551	66.4	Intron (uc009xpe.2/9886, intron 3 of 8)	10	62629198	62637816	8619	2	9886	uc009xpd.3	-23643	ENSG00000072422	RHOBTB1	Rho related BTB domain containing 1
chr10	62676866	62677685	820	*	MACS_peak_2552	52.84	Intron (uc009xpe.2/9886, intron 1 of 8)	10	62629198	62701612	72415	2	9886	uc009xpe.2	23927	ENSG00000072422	RHOBTB1	Rho related BTB domain containing 1
chr10	63689145	63689975	831	*	MACS_peak_2558	84.3	Intron (uc010qil.2/84159, intron 2 of 4)	10	63661013	63856707	195695	1	84159	uc001jlt.2	28132	ENSG00000150347	ARID5B	AT-rich interaction domain 5B
chr10	63691576	63692291	716	*	MACS_peak_2559	65	Intron (uc010qil.2/84159, intron 2 of 4)	10	63661013	63856707	195695	1	84159	uc001jlt.2	30563	ENSG00000150347	ARID5B	AT-rich interaction domain 5B
chr10	63808615	63809599	985	*	MACS_peak_2560	64.83	Promoter (<=1kb)	10	63808970	63856707	47738	1	84159	uc001jlu.2	0	ENSG00000150347	ARID5B	AT-rich interaction domain 5B
chr10	63829312	63830198	887	*	MACS_peak_2561	66.05	Exon (uc001jlt.2/84159, exon 8 of 10)	10	63808970	63856707	47738	1	84159	uc001jlu.2	20342	ENSG00000150347	ARID5B	AT-rich interaction domain 5B
chr10	64143036	64143771	736	*	MACS_peak_2564	65.53	Intron (uc001jly.4/22891, intron 2 of 4)	10	64133916	64431771	297856	1	22891	uc001jmc.2	9120	ENSG00000138311	ZNF365	zinc finger protein 365
chr10	64216601	64217427	827	*	MACS_peak_2565	80.23	Intron (uc001jmb.4/22891, intron 3 of 4)	10	64280207	64431771	151565	1	22891	uc001jmd.1	-62780	ENSG00000138311	ZNF365	zinc finger protein 365
chr10	64892469	64893774	1306	*	MACS_peak_2568	492.49	Promoter (<=1kb)	10	64893007	64914786	21780	1	29982	uc001jmj.4	0	ENSG00000148572	NRBF2	nuclear receptor binding factor 2
chr10	65280367	65282214	1848	*	MACS_peak_2570	91.06	Promoter (<=1kb)	10	65281123	65359067	77945	1	221035	uc009xpl.2	0	ENSG00000165476	REEP3	receptor accessory protein 3
chr10	65287840	65288599	760	*	MACS_peak_2571	203.58	Intron (uc009xpl.2/221035, intron 1 of 4)	10	65281123	65384883	103761	1	221035	uc001jmt.3	6717	ENSG00000165476	REEP3	receptor accessory protein 3
chr10	69643846	69644850	1005	*	MACS_peak_2584	958.39	Promoter (<=1kb)	10	69644427	69678147	33721	1	23411	uc001jnd.3	0	ENSG00000096717	SIRT1	sirtuin 1
chr10	70093020	70093582	563	*	MACS_peak_2586	55.88	Promoter (<=1kb)	10	70044838	70092684	47847	2	64081	uc001jnu.1	-336	ENSG00000108187	PBLD	phenazine biosynthesis like protein domain containing
chr10	70286573	70287781	1209	*	MACS_peak_2587	51.92	Promoter (<=1kb)	10	70242090	70287280	45191	2	8034	uc001joi.3	0	ENSG00000122912	SLC25A16	solute carrier family 25 member 16
chr10	70480380	70481257	878	*	MACS_peak_2588	453.98	Promoter (<=1kb)	10	70480971	70531202	50232	1	55749	uc001jol.1	0	ENSG00000060339	CCAR1	cell division cycle and apoptosis regulator 1
chr10	70883369	70884380	1012	*	MACS_peak_2589	841.65	Promoter (<=1kb)	10	70883908	70932616	48709	1	9559	uc001jpb.3	0	ENSG00000122958	VPS26A	VPS26, retromer complex component A
chr10	70939016	70940262	1247	*	MACS_peak_2590	630.2	Promoter (<=1kb)	10	70939993	70968849	28857	1	6832	uc001jpe.1	0	ENSG00000156502	SUPV3L1	Suv3 like RNA helicase
chr10	71254173	71255304	1132	*	MACS_peak_2593	65.26	Intron (uc001jpo.1/23555, intron 3 of 7)	10	71211226	71267423	56198	1	23555	uc001jpo.1	42947	ENSG00000099282	TSPAN15	tetraspanin 15
chr10	71585927	71587740	1814	*	MACS_peak_2597	286.66	Intron (uc001jqk.2/1305, intron 3 of 38)	10	71561644	71718904	157261	1	1305	uc021psh.1	24283	ENSG00000197467	COL13A1	collagen type XIII alpha 1 chain
chr10	71615959	71616576	618	*	MACS_peak_2598	50.77	Intron (uc001jqk.2/1305, intron 3 of 38)	10	71561644	71718904	157261	1	1305	uc021psh.1	54315	ENSG00000197467	COL13A1	collagen type XIII alpha 1 chain
chr10	71665879	71666810	932	*	MACS_peak_2599	180.69	Intron (uc001jqk.2/1305, intron 16 of 38)	10	71561644	71718904	157261	1	1305	uc021psh.1	104235	ENSG00000197467	COL13A1	collagen type XIII alpha 1 chain
chr10	71696141	71697010	870	*	MACS_peak_2600	78.08	Exon (uc001jqk.2/1305, exon 31 of 39)	10	71812357	71872040	59684	1	55506	uc001jqm.3	-115347	ENSG00000099284	H2AFY2	H2A histone family member Y2
chr10	71716176	71717854	1679	*	MACS_peak_2601	180.44	Exon (uc001jqk.2/1305, exon 38 of 39)	10	71812357	71872040	59684	1	55506	uc001jqm.3	-94503	ENSG00000099284	H2AFY2	H2A histone family member Y2
chr10	71904769	71906974	2206	*	MACS_peak_2603	71.83	Promoter (<=1kb)	10	71897737	71906496	8760	2	219743	uc001jqq.4	0	ENSG00000156521	TYSND1	trypsin domain containing 1
chr10	72014981	72016299	1319	*	MACS_peak_2605	102.79	Exon (uc021psj.1/64106, exon 4 of 4)	10	71962586	71993190	30605	2	5464	uc001jqv.1	-21791	ENSG00000180817	PPA1	pyrophosphatase (inorganic) 1
chr10	72080196	72080946	751	*	MACS_peak_2606	70.44	Intron (uc031pvo.1/55222, intron 3 of 3)	10	72014713	72043450	28738	2	64106	uc021psj.1	-36746	ENSG00000148734	NPFFR1	neuropeptide FF receptor 1
chr10	72256173	72257351	1179	*	MACS_peak_2607	52.86	Intron (uc001jrd.4/27143, intron 1 of 19)	10	72238564	72328206	89643	1	27143	uc001jrd.4	17609	ENSG00000107719	PALD1	phosphatase domain containing, paladin 1
chr10	72285141	72286359	1219	*	MACS_peak_2608	211.43	5' UTR	10	72299336	72328206	28871	1	27143	uc001jre.4	-12977	ENSG00000107719	PALD1	phosphatase domain containing, paladin 1
chr10	72288249	72289201	953	*	MACS_peak_2609	134.06	Exon (uc001jrd.4/27143, exon 3 of 20)	10	72299336	72328206	28871	1	27143	uc001jre.4	-10135	ENSG00000107719	PALD1	phosphatase domain containing, paladin 1
chr10	72355885	72356856	972	*	MACS_peak_2611	58.51	Downstream (<1kb)	10	72357104	72362531	5428	2	5551	uc001jrf.4	5675	ENSG00000180644	PRF1	perforin 1
chr10	72449118	72450943	1826	*	MACS_peak_2613	58.47	Intron (uc001jrg.3/140766, intron 2 of 21)	10	72432559	72522195	89637	1	140766	uc001jrh.3	16559	ENSG00000138316	ADAMTS14	ADAM metallopeptidase with thrombospondin type 1 motif 14
chr10	72486451	72487526	1076	*	MACS_peak_2614	339.34	Intron (uc001jrg.3/140766, intron 4 of 21)	10	72493714	72506400	12687	1	140766	uc001jri.1	-6188	ENSG00000138316	ADAMTS14	ADAM metallopeptidase with thrombospondin type 1 motif 14
chr10	72538590	72539549	960	*	MACS_peak_2615	90.61	Promoter (2-3kb)	10	72533564	72542122	8559	2	219793	uc009xqi.1	2573	ENSG00000166220	TBATA	thymus, brain and testes associated
chr10	73036582	73037856	1275	*	MACS_peak_2625	57.31	Intron (uc001jro.3/219699, intron 1 of 16)	10	73079010	73123147	44138	1	55315	uc001jrr.4	-41154	ENSG00000198246	SLC29A3	solute carrier family 29 member 3
chr10	73192959	73195001	2043	*	MACS_peak_2626	55.72	Intron (uc001jrv.3/64072, intron 1 of 4)	10	73199584	73407219	207636	1	64072	uc021psl.1	-4583	ENSG00000107736	CDH23	cadherin related 23
chr10	73209497	73210132	636	*	MACS_peak_2627	110.52	Intron (uc001jrv.3/64072, intron 1 of 4)	10	73199584	73407219	207636	1	64072	uc021psl.1	9913	ENSG00000107736	CDH23	cadherin related 23
chr10	73250571	73251351	781	*	MACS_peak_2628	52.37	Intron (uc001jrv.3/64072, intron 1 of 4)	10	73199584	73407219	207636	1	64072	uc021psl.1	50987	ENSG00000107736	CDH23	cadherin related 23
chr10	73252072	73253006	935	*	MACS_peak_2629	199.26	Intron (uc001jrv.3/64072, intron 1 of 4)	10	73199584	73407219	207636	1	64072	uc021psl.1	52488	ENSG00000107736	CDH23	cadherin related 23
chr10	73354635	73356131	1497	*	MACS_peak_2630	82.92	Intron (uc009xql.3/64072, intron 9 of 10)	10	73472361	73501793	29433	1	64072	uc001jsc.1	-116230	ENSG00000107736	CDH23	cadherin related 23
chr10	73380057	73381558	1502	*	MACS_peak_2631	82.83	Intron (uc001jrw.4/64072, intron 11 of 12)	10	73472361	73501793	29433	1	64072	uc001jsc.1	-90803	ENSG00000107736	CDH23	cadherin related 23
chr10	73520370	73522344	1975	*	MACS_peak_2632	77.64	5' UTR	10	73507314	73533337	26024	2	64115	uc001jsd.3	10993	ENSG00000107738	VSIR	V-set immunoregulatory receptor
chr10	73556297	73557207	911	*	MACS_peak_2633	53.23	Promoter (<=1kb)	10	73556613	73575704	19092	1	64072	uc001jsi.4	0	ENSG00000107736	CDH23	cadherin related 23
chr10	73610116	73611478	1363	*	MACS_peak_2634	181.37	Promoter (<=1kb)	10	73576055	73611082	35028	2	5660	uc001jsm.3	0	ENSG00000197746	PSAP	prosaposin
chr10	73619084	73620867	1784	*	MACS_peak_2635	68.52	Promoter (<=1kb)	10	73621147	73995618	374472	1	119504	uc021psn.1	-280	ENSG00000166295	ANAPC16	anaphase promoting complex subunit 16
chr10	73627626	73628509	884	*	MACS_peak_2636	126.56	Intron (uc021psn.1/119504, intron 1 of 3)	10	73621147	73995618	374472	1	119504	uc021psn.1	6479	ENSG00000166295	ANAPC16	anaphase promoting complex subunit 16
chr10	73648317	73649317	1001	*	MACS_peak_2637	115.82	Intron (uc021psn.1/119504, intron 1 of 3)	10	73621147	73995618	374472	1	119504	uc021psn.1	27170	ENSG00000166295	ANAPC16	anaphase promoting complex subunit 16
chr10	73804059	73805032	974	*	MACS_peak_2638	243.76	Intron (uc021psn.1/119504, intron 1 of 3)	10	73831617	73848372	16756	2	9806	uc010qjs.2	43340	ENSG00000107742	SPOCK2	SPARC/osteonectin, cwcv and kazal like domains proteoglycan 2
chr10	74113086	74115309	2224	*	MACS_peak_2642	288.04	Promoter (<=1kb)	10	74092588	74114907	22320	2	54788	uc001jsz.2	0	ENSG00000148719	DNAJB12	DnaJ heat shock protein family (Hsp40) member B12
chr10	74353760	74354174	415	*	MACS_peak_2643	56.41	Intron (uc001jtb.2/10367, intron 1 of 11)	10	74119698	74336541	216844	2	100302155	uc021pth.1	-17219	ENSG00000221808	MIR1256	microRNA 1256
chr10	74385375	74386359	985	*	MACS_peak_2644	475.69	Promoter (<=1kb)	10	74127084	74385949	258866	2	10367	uc001jtb.2	0	ENSG00000107745	MICU1	mitochondrial calcium uptake 1
chr10	74683156	74684721	1566	*	MACS_peak_2645	61.46	Exon (uc001jte.1/170392, exon 7 of 9)	10	74694938	74714510	19573	2	84647	uc001jtf.1	29789	ENSG00000138308	PLA2G12B	phospholipase A2 group XIIB
chr10	74822439	74823037	599	*	MACS_peak_2646	79.85	Intron (uc021ptj.1/5033, intron 4 of 13)	10	74766980	74834673	67694	2	5033	uc021ptj.1	11636	ENSG00000122884	P4HA1	prolyl 4-hydroxylase subunit alpha 1
chr10	74942104	74942868	765	*	MACS_peak_2647	132.98	Intron (uc009xqz.3/317662, intron 3 of 13)	10	74937604	74995207	57604	1	317662	uc001jtq.3	4500	ENSG00000138286	FAM149B1	family with sequence similarity 149 member B1
chr10	74964751	74965935	1185	*	MACS_peak_2648	70.92	Promoter (2-3kb)	10	74968377	75001939	33563	1	317662	uc009xra.3	-2442	ENSG00000138286	FAM149B1	family with sequence similarity 149 member B1
chr10	74969418	74969862	445	*	MACS_peak_2649	91.98	Promoter (1-2kb)	10	74968377	75001939	33563	1	317662	uc009xra.3	1041	ENSG00000138286	FAM149B1	family with sequence similarity 149 member B1
chr10	75312432	75313499	1068	*	MACS_peak_2650	110.05	Promoter (<=1kb)	10	75257296	75313098	55803	2	159195	uc001jun.3	0	ENSG00000166348	USP54	ubiquitin specific peptidase 54
chr10	75469605	75470532	928	*	MACS_peak_2651	53.96	Intron (uc001juu.4/729092, intron 10 of 18)	10	75434033	75457554	23522	2	729092	uc009xri.3	-12051	ENSG00000172650	AGAP5	ArfGAP with GTPase domain, ankyrin repeat and PH domain 5
chr10	75559516	75561543	2028	*	MACS_peak_2652	54.26	Promoter (<=1kb)	10	75559391	75560652	1262	1	23053	uc009xrn.2	125	ENSG00000214655	ZSWIM8	zinc finger SWIM-type containing 8
chr10	75607249	75608136	888	*	MACS_peak_2653	73.89	Exon (uc001jvm.2/818, exon 9 of 21)	10	75574761	75601969	27209	2	818	uc009xrp.1	-5280	ENSG00000148660	CAMK2G	calcium/calmodulin dependent protein kinase II gamma
chr10	75875766	75876434	669	*	MACS_peak_2654	86.9	Intron (uc009xrr.3/7414, intron 22 of 22)	10	75880015	75910519	30505	2	26985	uc001jwf.3	34085	ENSG00000185009	AP3M1	adaptor related protein complex 3 mu 1 subunit
chr10	75935771	75937299	1529	*	MACS_peak_2655	162.2	Promoter (<=1kb)	10	75936247	76469061	532815	1	132	uc001jwj.3	0	ENSG00000156110	ADK	adenosine kinase
chr10	76192965	76193468	504	*	MACS_peak_2656	85.5	Intron (uc001jwi.3/132, intron 6 of 10)	10	75936247	76469061	532815	1	132	uc010qlc.2	256718	ENSG00000156110	ADK	adenosine kinase
chr10	76452859	76453720	862	*	MACS_peak_2657	72.47	Intron (uc001jwi.3/132, intron 10 of 10)	10	76586171	76792380	206210	1	23522	uc001jwm.2	-132451	ENSG00000156650	KAT6B	lysine acetyltransferase 6B
chr10	76584345	76585895	1551	*	MACS_peak_2658	59.22	Promoter (<=1kb)	10	76586171	76792380	206210	1	23522	uc001jwm.2	-276	ENSG00000156650	KAT6B	lysine acetyltransferase 6B
chr10	76969458	76970741	1284	*	MACS_peak_2660	90.08	Promoter (<=1kb)	10	76969912	76991207	21296	1	7417	uc021ptp.1	0	ENSG00000165637	VDAC2	voltage dependent anion channel 2
chr10	76994282	76996208	1927	*	MACS_peak_2661	522.26	Promoter (<=1kb)	10	76993729	76995770	2042	2	118881	uc001jxb.3	0	ENSG00000165644	COMTD1	catechol-O-methyltransferase domain containing 1
chr10	77054121	77055343	1223	*	MACS_peak_2663	89.63	Promoter (<=1kb)	10	77056141	77121436	65296	1	253264	uc001jxd.2	-798	ENSG00000226051	ZNF503-AS1	ZNF503 antisense RNA 1
chr10	77160528	77163541	3014	*	MACS_peak_2665	119.11	Promoter (<=1kb)	10	77161286	77168740	7455	1	100131213	uc010qlf.2	0	ENSG00000237149	ZNF503-AS2	ZNF503 antisense RNA 2
chr10	77760073	77760946	874	*	MACS_peak_2669	103.75	Intron (uc001jxi.3/83938, intron 1 of 5)	10	77542519	78317126	774608	1	83938	uc001jxi.3	217554	ENSG00000148655	LRMDA	leucine rich melanocyte differentiation associated
chr10	77793635	77794436	802	*	MACS_peak_2670	61.18	Intron (uc001jxi.3/83938, intron 1 of 5)	10	77542519	78317126	774608	1	83938	uc001jxi.3	251116	ENSG00000148655	LRMDA	leucine rich melanocyte differentiation associated
chr10	77803098	77803756	659	*	MACS_peak_2671	65.75	Intron (uc001jxi.3/83938, intron 2 of 5)	10	77542519	78317126	774608	1	83938	uc001jxi.3	260579	ENSG00000148655	LRMDA	leucine rich melanocyte differentiation associated
chr10	77960894	77961570	677	*	MACS_peak_2672	98.02	Intron (uc001jxi.3/83938, intron 4 of 5)	10	77542519	78317126	774608	1	83938	uc001jxi.3	418375	ENSG00000148655	LRMDA	leucine rich melanocyte differentiation associated
chr10	78269069	78269780	712	*	MACS_peak_2673	51.88	Intron (uc001jxi.3/83938, intron 5 of 5)	10	78643874	78870101	226228	2	3778	uc001jxl.1	600321	ENSG00000156113	KCNMA1	potassium calcium-activated channel subfamily M alpha 1
chr10	78294142	78295048	907	*	MACS_peak_2674	85	Intron (uc001jxi.3/83938, intron 5 of 5)	10	78643874	78870101	226228	2	3778	uc001jxl.1	575053	ENSG00000156113	KCNMA1	potassium calcium-activated channel subfamily M alpha 1
chr10	78305900	78306672	773	*	MACS_peak_2675	55.56	Intron (uc001jxi.3/83938, intron 5 of 5)	10	78643874	78870101	226228	2	3778	uc001jxl.1	563429	ENSG00000156113	KCNMA1	potassium calcium-activated channel subfamily M alpha 1
chr10	78312012	78312803	792	*	MACS_peak_2676	159.65	Intron (uc001jxi.3/83938, intron 5 of 5)	10	78643874	78870101	226228	2	3778	uc001jxl.1	557298	ENSG00000156113	KCNMA1	potassium calcium-activated channel subfamily M alpha 1
chr10	78862689	78863608	920	*	MACS_peak_2680	114.5	Intron (uc001jxj.2/3778, intron 9 of 28)	10	78643874	78870101	226228	2	3778	uc001jxl.1	6493	ENSG00000156113	KCNMA1	potassium calcium-activated channel subfamily M alpha 1
chr10	78895178	78895979	802	*	MACS_peak_2681	191.41	Intron (uc001jxj.2/3778, intron 5 of 28)	10	78643874	78870101	226228	2	3778	uc001jxl.1	-25077	ENSG00000156113	KCNMA1	potassium calcium-activated channel subfamily M alpha 1
chr10	79651503	79652457	955	*	MACS_peak_2683	63.89	Promoter (2-3kb)	10	79555819	79649261	93443	2	9231	uc009xru.1	-2242	ENSG00000151208	DLG5	discs large MAGUK scaffold protein 5
chr10	79664933	79665718	786	*	MACS_peak_2684	159.8	Intron (uc001jzk.3/9231, intron 1 of 31)	10	79555819	79649261	93443	2	9231	uc009xru.1	-15672	ENSG00000151208	DLG5	discs large MAGUK scaffold protein 5
chr10	79802716	79803938	1223	*	MACS_peak_2686	167.45	Intron (uc001jzs.3/6229, intron 4 of 4)	10	79793518	79816571	23054	1	6229	uc001jzs.3	9198	ENSG00000138326	RPS24	ribosomal protein S24
chr10	79813312	79814810	1499	*	MACS_peak_2687	185.07	3' UTR	10	79793518	79816571	23054	1	6229	uc001jzs.3	19794	ENSG00000138326	RPS24	ribosomal protein S24
chr10	80080099	80081526	1428	*	MACS_peak_2692	111.19	Intron (uc010qlp.2/100132987, intron 1 of 3)	10	80027085	80159502	132418	1	414243	uc001jzw.2	53014	ENSG00000230417	LINC00595	long intergenic non-protein coding RNA 595
chr10	80140991	80142406	1416	*	MACS_peak_2693	435.41	Intron (uc010qlp.2/100132987, intron 1 of 3)	10	80027085	80159502	132418	1	414243	uc001jzw.2	113906	ENSG00000230417	LINC00595	long intergenic non-protein coding RNA 595
chr10	80145128	80146060	933	*	MACS_peak_2694	600.36	Intron (uc010qlp.2/100132987, intron 1 of 3)	10	80027085	80159502	132418	1	414243	uc001jzw.2	118043	ENSG00000230417	LINC00595	long intergenic non-protein coding RNA 595
chr10	80238629	80239791	1163	*	MACS_peak_2695	244.62	Intron (uc010qlp.2/100132987, intron 1 of 3)	10	80027085	80159502	132418	1	414243	uc001jzw.2	211544	ENSG00000230417	LINC00595	long intergenic non-protein coding RNA 595
chr10	80296484	80297312	829	*	MACS_peak_2696	86.17	Intron (uc010qlp.2/100132987, intron 3 of 3)	10	80027085	80159502	132418	1	414243	uc001jzw.2	269399	ENSG00000230417	LINC00595	long intergenic non-protein coding RNA 595
chr10	80310364	80311795	1432	*	MACS_peak_2697	75.35	Exon (uc010qlp.2/100132987, exon 4 of 4)	10	80027085	80159502	132418	1	414243	uc001jzw.2	283279	ENSG00000230417	LINC00595	long intergenic non-protein coding RNA 595
chr10	80719923	80721105	1183	*	MACS_peak_2705	104.75	Exon (uc001jzx.3/283050, exon 6 of 8)	10	80703083	80827205	124123	2	283050	uc001jzx.3	106100	ENSG00000224596	ZMIZ1-AS1	ZMIZ1 antisense RNA 1
chr10	80724126	80726179	2054	*	MACS_peak_2706	106.51	Intron (uc001jzx.3/283050, intron 4 of 7)	10	80703083	80827205	124123	2	283050	uc001jzx.3	101026	ENSG00000224596	ZMIZ1-AS1	ZMIZ1 antisense RNA 1
chr10	80732051	80734235	2185	*	MACS_peak_2707	159.96	Intron (uc001jzx.3/283050, intron 4 of 7)	10	80703083	80827205	124123	2	283050	uc001jzx.3	92970	ENSG00000224596	ZMIZ1-AS1	ZMIZ1 antisense RNA 1
chr10	80831100	80831995	896	*	MACS_peak_2708	70.23	Promoter (2-3kb)	10	80828792	81076285	247494	1	57178	uc001kaf.2	2308	ENSG00000108175	ZMIZ1	zinc finger MIZ-type containing 1
chr10	80832494	80834234	1741	*	MACS_peak_2709	53.69	Intron (uc001kaf.2/57178, intron 1 of 24)	10	80828792	81076285	247494	1	57178	uc001kaf.2	3702	ENSG00000108175	ZMIZ1	zinc finger MIZ-type containing 1
chr10	80861029	80862568	1540	*	MACS_peak_2710	72.03	Intron (uc001kaf.2/57178, intron 1 of 24)	10	80828792	81076285	247494	1	57178	uc001kaf.2	32237	ENSG00000108175	ZMIZ1	zinc finger MIZ-type containing 1
chr10	80876068	80877183	1116	*	MACS_peak_2711	73.98	Intron (uc001kaf.2/57178, intron 1 of 24)	10	80899439	80977183	77745	1	57178	uc001kae.3	-22256	ENSG00000108175	ZMIZ1	zinc finger MIZ-type containing 1
chr10	80892467	80893279	813	*	MACS_peak_2712	118.63	Intron (uc001kaf.2/57178, intron 2 of 24)	10	80899439	80977183	77745	1	57178	uc001kae.3	-6160	ENSG00000108175	ZMIZ1	zinc finger MIZ-type containing 1
chr10	80908910	80910311	1402	*	MACS_peak_2713	75.33	Intron (uc001kaf.2/57178, intron 3 of 24)	10	80899439	80977183	77745	1	57178	uc001kae.3	9471	ENSG00000108175	ZMIZ1	zinc finger MIZ-type containing 1
chr10	80947662	80948384	723	*	MACS_peak_2714	51.23	Intron (uc001kaf.2/57178, intron 4 of 24)	10	80899439	80977183	77745	1	57178	uc001kae.3	48223	ENSG00000108175	ZMIZ1	zinc finger MIZ-type containing 1
chr10	80978620	80980350	1731	*	MACS_peak_2715	99.04	Intron (uc001kaf.2/57178, intron 7 of 24)	10	81003425	81076285	72861	1	57178	uc001kag.2	-23075	ENSG00000108175	ZMIZ1	zinc finger MIZ-type containing 1
chr10	80980414	80981922	1509	*	MACS_peak_2716	53.23	Intron (uc001kaf.2/57178, intron 7 of 24)	10	81003425	81076285	72861	1	57178	uc001kag.2	-21503	ENSG00000108175	ZMIZ1	zinc finger MIZ-type containing 1
chr10	80998397	80999541	1145	*	MACS_peak_2717	220.66	Intron (uc001kaf.2/57178, intron 7 of 24)	10	81003425	81076285	72861	1	57178	uc001kag.2	-3884	ENSG00000108175	ZMIZ1	zinc finger MIZ-type containing 1
chr10	81058902	81061468	2567	*	MACS_peak_2718	61.7	Exon (uc001kaf.2/57178, exon 16 of 25)	10	81065857	81076285	10429	1	57178	uc010qlq.1	-4389	ENSG00000108175	ZMIZ1	zinc finger MIZ-type containing 1
chr10	81136198	81139238	3041	*	MACS_peak_2720	95.85	Downstream (2-3kb)	10	81107220	81115089	7870	1	10105	uc001kaj.3	28978	ENSG00000108179	PPIF	peptidylprolyl isomerase F
chr10	81174024	81174741	718	*	MACS_peak_2721	61.26	Intron (uc010qlr.2/219654, intron 2 of 3)	10	81142083	81203928	61846	2	219654	uc010qlr.2	29187	ENSG00000165424	ZCCHC24	zinc finger CCHC-type containing 24
chr10	81197023	81198612	1590	*	MACS_peak_2722	59.79	Intron (uc010qlr.2/219654, intron 1 of 3)	10	81142083	81203928	61846	2	219654	uc010qlr.2	5316	ENSG00000165424	ZCCHC24	zinc finger CCHC-type containing 24
chr10	81693503	81694745	1243	*	MACS_peak_2723	51.05	Downstream (2-3kb)	10	81679934	81682875	2942	1	8512	uc001kbg.1	13569	ENSG00000242600	MBL1P	mannose binding lectin 1, pseudogene
chr10	81917749	81918980	1232	*	MACS_peak_2727	67.3	Exon (uc010qlx.1/311, exon 10 of 13)	10	81914880	81931076	16197	2	311	uc010qlx.1	12096	ENSG00000122359	ANXA11	annexin A11
chr10	82167556	82168852	1297	*	MACS_peak_2728	244.65	Promoter (<=1kb)	10	82167585	82192753	25169	1	84293	uc021pux.1	0	ENSG00000122378	FAM213A	family with sequence similarity 213 member A
chr10	82223628	82225525	1898	*	MACS_peak_2729	267.92	Intron (uc001kci.4/81619, intron 1 of 7)	10	82214038	82282391	68354	1	81619	uc009xss.3	9590	ENSG00000108219	TSPAN14	tetraspanin 14
chr10	82233996	82234953	958	*	MACS_peak_2730	70.25	Intron (uc001kci.4/81619, intron 1 of 7)	10	82214038	82282391	68354	1	81619	uc009xss.3	19958	ENSG00000108219	TSPAN14	tetraspanin 14
chr10	82258314	82260770	2457	*	MACS_peak_2731	136.76	Intron (uc001kci.4/81619, intron 2 of 7)	10	82297658	82406316	108659	1	387694	uc001kck.1	-36888	ENSG00000178217	SH2D4B	SH2 domain containing 4B
chr10	82268006	82269947	1942	*	MACS_peak_2732	166.55	Exon (uc001kci.4/81619, exon 4 of 8)	10	82297658	82406316	108659	1	387694	uc001kck.1	-27711	ENSG00000178217	SH2D4B	SH2 domain containing 4B
chr10	82377360	82378138	779	*	MACS_peak_2733	52.86	Intron (uc001kck.1/387694, intron 6 of 6)	10	82363335	82406316	42982	1	387694	uc001kcm.1	14025	ENSG00000178217	SH2D4B	SH2 domain containing 4B
chr10	83660474	83662037	1564	*	MACS_peak_2737	187.05	Intron (uc001kco.2/10718, intron 1 of 8)	10	83637717	84746935	1109219	1	10718	uc021pvi.1	22757	ENSG00000185737	NRG3	neuregulin 3
chr10	83668840	83669751	912	*	MACS_peak_2738	145.66	Intron (uc001kco.2/10718, intron 1 of 8)	10	83637717	84746935	1109219	1	10718	uc021pvi.1	31123	ENSG00000185737	NRG3	neuregulin 3
chr10	83775942	83776664	723	*	MACS_peak_2739	109.33	Intron (uc001kco.2/10718, intron 1 of 8)	10	83637717	84746935	1109219	1	10718	uc021pvi.1	138225	ENSG00000185737	NRG3	neuregulin 3
chr10	83950240	83951205	966	*	MACS_peak_2740	64.62	Intron (uc001kco.2/10718, intron 1 of 8)	10	84118495	84746935	628441	1	10718	uc021pvk.1	-167290	ENSG00000185737	NRG3	neuregulin 3
chr10	84127346	84127888	543	*	MACS_peak_2741	72.49	Intron (uc001kco.2/10718, intron 2 of 8)	10	84118495	84746935	628441	1	10718	uc021pvk.1	8851	ENSG00000185737	NRG3	neuregulin 3
chr10	84212263	84212891	629	*	MACS_peak_2742	65.32	Intron (uc001kco.2/10718, intron 2 of 8)	10	84118495	84746935	628441	1	10718	uc021pvk.1	93768	ENSG00000185737	NRG3	neuregulin 3
chr10	84606560	84607199	640	*	MACS_peak_2743	72.87	Intron (uc001kco.2/10718, intron 3 of 8)	10	84559498	84746935	187438	1	10718	uc021pvl.1	47062	ENSG00000185737	NRG3	neuregulin 3
chr10	86003870	86005260	1391	*	MACS_peak_2753	106.06	Promoter (<=1kb)	10	86004809	86010273	5465	1	5995	uc001kdb.1	0	ENSG00000148604	RGR	retinal G protein coupled receptor
chr10	86110457	86110783	327	*	MACS_peak_2754	66.18	Intron (uc001kdg.1/54462, intron 1 of 2)	10	86088410	86278276	189867	1	54462	uc010qmd.1	22047	ENSG00000107771	CCSER2	coiled-coil serine rich protein 2
chr10	86140402	86140999	598	*	MACS_peak_2755	58.29	Intron (uc001kdh.1/54462, intron 3 of 10)	10	86153609	86278276	124668	1	54462	uc001kdi.2	-12610	ENSG00000107771	CCSER2	coiled-coil serine rich protein 2
chr10	87376806	87377604	799	*	MACS_peak_2765	120.02	Intron (uc010qmf.1/2894, intron 7 of 8)	10	87337488	87366972	29485	1	100507470	uc001kdk.2	39318	ENSG00000234942	GRID1-AS1	GRID1 antisense RNA 1
chr10	87498546	87499429	884	*	MACS_peak_2766	81.15	Intron (uc010qmf.1/2894, intron 1 of 8)	10	87359312	87551316	192005	2	2894	uc010qmf.1	51887	ENSG00000182771	GRID1	glutamate ionotropic receptor delta type subunit 1
chr10	87507669	87508270	602	*	MACS_peak_2767	112.96	Intron (uc010qmf.1/2894, intron 1 of 8)	10	87359312	87551316	192005	2	2894	uc010qmf.1	43046	ENSG00000182771	GRID1	glutamate ionotropic receptor delta type subunit 1
chr10	87732672	87733002	331	*	MACS_peak_2768	201.59	Intron (uc001kdl.1/2894, intron 4 of 15)	10	87359312	87551316	192005	2	2894	uc010qmf.1	-181356	ENSG00000182771	GRID1	glutamate ionotropic receptor delta type subunit 1
chr10	87784226	87785589	1364	*	MACS_peak_2769	53.18	Intron (uc001kdl.1/2894, intron 4 of 15)	10	87359312	87551316	192005	2	2894	uc010qmf.1	-232910	ENSG00000182771	GRID1	glutamate ionotropic receptor delta type subunit 1
chr10	87841859	87843321	1463	*	MACS_peak_2770	106.17	Intron (uc001kdl.1/2894, intron 4 of 15)	10	88024451	88024545	95	2	442911	uc010qmg.2	181224	ENSG00000199104	MIR346	microRNA 346
chr10	87915476	87916919	1444	*	MACS_peak_2771	85.51	Intron (uc001kdl.1/2894, intron 3 of 15)	10	88024451	88024545	95	2	442911	uc010qmg.2	107626	ENSG00000199104	MIR346	microRNA 346
chr10	88045914	88047268	1355	*	MACS_peak_2772	75.58	Intron (uc001kdl.1/2894, intron 2 of 15)	10	88024451	88024545	95	2	442911	uc010qmg.2	-21369	ENSG00000199104	MIR346	microRNA 346
chr10	88054906	88055890	985	*	MACS_peak_2773	178.36	Intron (uc001kdl.1/2894, intron 2 of 15)	10	88024451	88024545	95	2	442911	uc010qmg.2	-30361	ENSG00000199104	MIR346	microRNA 346
chr10	88086045	88086953	909	*	MACS_peak_2774	109.75	Intron (uc001kdl.1/2894, intron 2 of 15)	10	87359312	88126250	766939	2	2894	uc001kdl.1	39297	ENSG00000182771	GRID1	glutamate ionotropic receptor delta type subunit 1
chr10	88112365	88113992	1628	*	MACS_peak_2775	61.55	Intron (uc001kdl.1/2894, intron 2 of 15)	10	87359312	88126250	766939	2	2894	uc001kdl.1	12258	ENSG00000182771	GRID1	glutamate ionotropic receptor delta type subunit 1
chr10	88438394	88442772	4379	*	MACS_peak_2778	197.96	5' UTR	10	88428426	88495824	67399	1	11155	uc009xsz.3	9968	ENSG00000122367	LDB3	LIM domain binding 3
chr10	88812605	88813529	925	*	MACS_peak_2779	134.83	Exon (uc001keg.3/2746, exon 15 of 16)	10	88780046	88784487	4442	1	643161	uc010qmo.2	32559	ENSG00000188100	FAM25A	family with sequence similarity 25 member A
chr10	88854784	88855745	962	*	MACS_peak_2780	158.28	Promoter (<=1kb)	10	88854953	88951222	96270	1	54537	uc001kei.4	0	ENSG00000122376	FAM35A	family with sequence similarity 35 member A
chr10	89264307	89265668	1362	*	MACS_peak_2781	53.17	Promoter (<=1kb)	10	89264223	89313218	48996	1	9562	uc009xtf.2	84	ENSG00000107789	MINPP1	multiple inositol-polyphosphate phosphatase 1
chr10	89577334	89578453	1120	*	MACS_peak_2782	51.23	Promoter (<=1kb)	10	89578070	89605369	27300	1	142913	uc001kfa.4	0	ENSG00000223820	CFL1P1	cofilin 1 pseudogene 1
chr10	90301864	90302564	701	*	MACS_peak_2786	50.44	Promoter (2-3kb)	10	90043859	90305279	261421	2	55328	uc009xtj.3	2715	ENSG00000184719	RNLS	renalase, FAD dependent amine oxidase
chr10	90511333	90511846	514	*	MACS_peak_2787	65.5	Intron (uc010qmv.2/643414, intron 8 of 8)	10	90521163	90537999	16837	1	643418	uc010qmw.2	-9317	ENSG00000204020	LIPN	lipase family member N
chr10	90639341	90640903	1563	*	MACS_peak_2788	125.72	Promoter (<=1kb)	10	90639944	90683259	43316	1	57559	uc001kfk.4	0	ENSG00000138134	STAMBPL1	STAM binding protein like 1
chr10	90966102	90967222	1121	*	MACS_peak_2792	65.5	Promoter (<=1kb)	10	90965694	90967071	1378	2	9023	uc001kfz.3	0	ENSG00000138135	CH25H	cholesterol 25-hydroxylase
chr10	90998916	91000106	1191	*	MACS_peak_2793	116.96	Intron (uc001kga.4/3988, intron 3 of 9)	10	90973326	91011660	38335	2	3988	uc001kga.4	11554	ENSG00000107798	LIPA	lipase A, lysosomal acid type
chr10	91174294	91175538	1245	*	MACS_peak_2794	57.25	Promoter (<=1kb)	10	91174325	91178576	4252	1	24138	uc010qng.1	0	ENSG00000152778	IFIT5	interferon induced protein with tetratricopeptide repeats 5
chr10	91272980	91273538	559	*	MACS_peak_2795	71.06	Intron (uc001kgm.3/387700, intron 2 of 7)	10	91190051	91295313	105263	2	387700	uc001kgm.3	21775	ENSG00000152779	SLC16A12	solute carrier family 16 member 12
chr10	91351121	91352166	1046	*	MACS_peak_2796	63.28	Promoter (<=1kb)	10	91352504	91352584	81	2	406901	uc001kgq.2	418	ENSG00000198997	MIR107	microRNA 107
chr10	91403748	91406156	2409	*	MACS_peak_2797	220.45	Promoter (<=1kb)	10	91339254	91405329	66076	2	53354	uc001kgp.2	0	ENSG00000152782	PANK1	pantothenate kinase 1
chr10	93002787	93003436	650	*	MACS_peak_2800	83.66	Intron (uc001khh.4/84333, intron 3 of 9)	10	92980359	93044088	63730	1	84333	uc001khi.4	22428	ENSG00000180628	PCGF5	polycomb group ring finger 5
chr10	93191727	93192368	642	*	MACS_peak_2801	103.59	Intron (uc001khk.2/143279, intron 2 of 4)	10	93170096	93274520	104425	1	143279	uc010qnm.1	21631	ENSG00000165338	HECTD2	HECT domain E3 ubiquitin protein ligase 2
chr10	93334535	93335640	1106	*	MACS_peak_2802	58.06	Intron (uc010qnl.2/100188947, intron 1 of 4)	10	93066719	93371217	304499	2	100188947	uc010qnl.2	35577	NA	HECTD2-AS1	HECTD2 antisense RNA 1
chr10	93557707	93558673	967	*	MACS_peak_2803	197.03	Promoter (<=1kb)	10	93558151	93625232	67082	1	80351	uc001khp.3	0	ENSG00000107854	TNKS2	tankyrase 2
chr10	93572419	93573213	795	*	MACS_peak_2804	69.27	Exon (uc001khp.3/80351, exon 2 of 27)	10	93558151	93625232	67082	1	80351	uc001khp.3	14268	ENSG00000107854	TNKS2	tankyrase 2
chr10	95181050	95181778	729	*	MACS_peak_2811	58.29	Intron (uc001kin.3/26509, intron 5 of 53)	10	95066186	95141153	74968	2	26509	uc009xue.3	-39897	ENSG00000138119	MYOF	myoferlin
chr10	95196811	95198221	1411	*	MACS_peak_2812	115.12	Intron (uc001kin.3/26509, intron 3 of 53)	10	95066186	95242074	175889	2	26509	uc001kin.3	43853	ENSG00000138119	MYOF	myoferlin
chr10	95225363	95226333	971	*	MACS_peak_2813	64.5	Intron (uc001kin.3/26509, intron 1 of 53)	10	95066186	95242074	175889	2	26509	uc001kin.3	15741	ENSG00000138119	MYOF	myoferlin
chr10	95455319	95455833	515	*	MACS_peak_2815	84.33	Intron (uc001kiv.2/118924, intron 4 of 15)	10	95448837	95460095	11259	2	118924	uc001kjb.1	4262	ENSG00000148690	FRA10AC1	FRA10A associated CGG repeat 1
chr10	95653223	95654203	981	*	MACS_peak_2817	58.03	Promoter (<=1kb)	10	95653730	95662491	8762	1	159371	uc001kjf.2	0	ENSG00000176273	SLC35G1	solute carrier family 35 member G1
chr10	95707079	95707967	889	*	MACS_peak_2818	94.51	Intron (uc001kji.3/159371, intron 3 of 3)	10	95717897	95721672	3776	2	266971	uc009xuj.2	13705	ENSG00000180764	PIPSL	PIP5K1A and PSMD4-like, pseudogene
chr10	95811123	95811955	833	*	MACS_peak_2819	90.67	Intron (uc001kjk.3/51196, intron 2 of 32)	10	95790440	96088148	297709	1	51196	uc010qnx.2	20683	ENSG00000138193	PLCE1	phospholipase C epsilon 1
chr10	95845154	95846623	1470	*	MACS_peak_2820	86.94	Promoter (2-3kb)	10	95848830	96088148	239319	1	51196	uc001kjm.3	-2207	ENSG00000138193	PLCE1	phospholipase C epsilon 1
chr10	95972623	95973428	806	*	MACS_peak_2821	77.94	Intron (uc001kjk.3/51196, intron 4 of 32)	10	96044605	96085355	40751	1	51196	uc001kjp.3	-71177	ENSG00000138193	PLCE1	phospholipase C epsilon 1
chr10	96122264	96123254	991	*	MACS_peak_2822	94.84	Promoter (<=1kb)	10	96092989	96122683	29695	2	64318	uc001kjq.1	0	ENSG00000173145	NOC3L	NOC3 like DNA replication regulator
chr10	97161506	97162474	969	*	MACS_peak_2825	108.9	Intron (uc001kkl.3/10580, intron 4 of 23)	10	97071530	97145062	73533	2	10580	uc001kkk.3	-16444	ENSG00000095637	SORBS1	sorbin and SH3 domain containing 1
chr10	97171145	97171824	680	*	MACS_peak_2826	95.38	Intron (uc001kkl.3/10580, intron 2 of 23)	10	97071530	97181830	110301	2	10580	uc001kkl.3	10006	ENSG00000095637	SORBS1	sorbin and SH3 domain containing 1
chr10	97174932	97176098	1167	*	MACS_peak_2827	115.25	Exon (uc010qof.1/10580, exon 7 of 21)	10	97071530	97181830	110301	2	10580	uc001kkl.3	5732	ENSG00000095637	SORBS1	sorbin and SH3 domain containing 1
chr10	97283875	97285529	1655	*	MACS_peak_2828	100.06	Intron (uc001kku.3/10580, intron 1 of 25)	10	97071530	97321171	249642	2	10580	uc001kku.3	35642	ENSG00000095637	SORBS1	sorbin and SH3 domain containing 1
chr10	97453085	97454047	963	*	MACS_peak_2829	59	Promoter (<=1kb)	10	97423153	97453900	30748	2	26123	uc001klb.4	0	ENSG00000119977	TCTN3	tectonic family member 3
chr10	97574716	97576301	1586	*	MACS_peak_2830	56.07	Intron (uc001kle.1/953, intron 1 of 5)	10	97515673	97637023	121351	1	953	uc010qon.2	59043	ENSG00000138185	ENTPD1	ectonucleoside triphosphate diphosphohydrolase 1
chr10	97666775	97668139	1365	*	MACS_peak_2831	115.43	Promoter (<=1kb)	10	97667722	97698415	30694	1	100127889	uc010qoo.2	0	NA	NA	NA
chr10	97757932	97758741	810	*	MACS_peak_2832	50.46	Promoter (1-2kb)	10	97759848	97792441	32594	1	387707	uc001kll.3	-1107	ENSG00000188649	CC2D2B	coiled-coil and C2 domain containing 2B
chr10	98134638	98135547	910	*	MACS_peak_2833	54.42	Intron (uc001kml.2/7093, intron 18 of 20)	10	98114999	98119092	4094	2	93377	uc009xve.1	-15546	ENSG00000197430	OPALIN	oligodendrocytic myelin paranodal and inner loop protein
chr10	98223595	98224470	876	*	MACS_peak_2834	79.3	Intron (uc001kml.2/7093, intron 2 of 20)	10	98124363	98273683	149321	2	7093	uc001kml.2	49213	ENSG00000095587	TLL2	tolloid like 2
chr10	98367727	98368663	937	*	MACS_peak_2835	333.39	Intron (uc001kmo.3/118788, intron 7 of 9)	10	98277867	98346809	68943	2	56889	uc001kmm.4	-20918	ENSG00000077147	TM9SF3	transmembrane 9 superfamily member 3
chr10	98409844	98410661	818	*	MACS_peak_2836	106.48	Intron (uc001kmp.3/118788, intron 5 of 15)	10	98353069	98392998	39930	2	118788	uc001kmo.3	-16846	ENSG00000155629	PIK3AP1	phosphoinositide-3-kinase adaptor protein 1
chr10	98796852	98798187	1336	*	MACS_peak_2837	150.72	Exon (uc001kmw.2/6585, exon 22 of 37)	10	98741041	98745585	4545	1	26148	uc001kmv.3	55811	NA	NA	NA
chr10	98799029	98800719	1691	*	MACS_peak_2838	98.76	Exon (uc001kmw.2/6585, exon 21 of 37)	10	98741041	98745585	4545	1	26148	uc001kmv.3	57988	NA	NA	NA
chr10	98813713	98814384	672	*	MACS_peak_2839	69.14	Intron (uc001kmw.2/6585, intron 13 of 36)	10	98862513	98863504	992	1	100505540	uc001kmx.2	-48129	ENSG00000234855	SLIT1-AS1	SLIT1 antisense RNA 1
chr10	98825675	98827443	1769	*	MACS_peak_2840	123.09	Exon (uc001kmw.2/6585, exon 5 of 37)	10	98862513	98863504	992	1	100505540	uc001kmx.2	-35070	ENSG00000234855	SLIT1-AS1	SLIT1 antisense RNA 1
chr10	98829005	98830794	1790	*	MACS_peak_2841	94.39	Intron (uc001kmw.2/6585, intron 4 of 36)	10	98862513	98863504	992	1	100505540	uc001kmx.2	-31719	ENSG00000234855	SLIT1-AS1	SLIT1 antisense RNA 1
chr10	98883227	98884144	918	*	MACS_peak_2842	100.5	Intron (uc001kmw.2/6585, intron 4 of 36)	10	98862513	98863504	992	1	100505540	uc001kmx.2	20714	ENSG00000234855	SLIT1-AS1	SLIT1 antisense RNA 1
chr10	98894213	98895056	844	*	MACS_peak_2843	54.18	Intron (uc001kmw.2/6585, intron 4 of 36)	10	98862513	98863504	992	1	100505540	uc001kmx.2	31700	ENSG00000234855	SLIT1-AS1	SLIT1 antisense RNA 1
chr10	99257373	99258961	1589	*	MACS_peak_2846	188.71	Promoter (<=1kb)	10	99218081	99258149	40069	2	64210	uc001knr.3	0	ENSG00000155229	MMS19	MMS19 homolog, cytosolic iron-sulfur assembly component
chr10	99343473	99345411	1939	*	MACS_peak_2847	81.36	Promoter (<=1kb)	10	99344102	99360705	16604	1	112817	uc001knx.2	0	ENSG00000241935	HOGA1	4-hydroxy-2-oxoglutarate aldolase 1
chr10	99446534	99448900	2367	*	MACS_peak_2848	317.42	Promoter (<=1kb)	10	99437181	99446625	9445	2	60370	uc001koh.1	0	ENSG00000119986	AVPI1	arginine vasopressin induced 1
chr10	99449092	99449907	816	*	MACS_peak_2849	512.18	Promoter (2-3kb)	10	99437181	99447015	9835	2	60370	uc001koi.2	-2077	ENSG00000119986	AVPI1	arginine vasopressin induced 1
chr10	99520249	99521582	1334	*	MACS_peak_2850	59.25	3' UTR	10	99526508	99531756	5249	2	6425	uc001kor.4	10174	ENSG00000120057	SFRP5	secreted frizzled related protein 5
chr10	99523917	99524970	1054	*	MACS_peak_2851	81.18	Downstream (1-2kb)	10	99526508	99531756	5249	2	6425	uc001kor.4	6786	ENSG00000120057	SFRP5	secreted frizzled related protein 5
chr10	99620975	99621788	814	*	MACS_peak_2854	56	Intron (uc001kos.3/401647, intron 2 of 4)	10	99609995	99631335	21341	1	401647	uc001kos.3	10980	ENSG00000155265	GOLGA7B	golgin A7 family member B
chr10	99637090	99638014	925	*	MACS_peak_2855	91.47	Intron (uc001kot.2/55118, intron 11 of 11)	10	99609995	99631335	21341	1	401647	uc001kos.3	27095	ENSG00000155265	GOLGA7B	golgin A7 family member B
chr10	99648966	99650151	1186	*	MACS_peak_2856	495.54	Intron (uc001kot.2/55118, intron 9 of 11)	10	99609995	99631335	21341	1	401647	uc001kos.3	38971	ENSG00000155265	GOLGA7B	golgin A7 family member B
chr10	99652373	99652987	615	*	MACS_peak_2857	75.34	Intron (uc001kot.2/55118, intron 9 of 11)	10	99609995	99631335	21341	1	401647	uc001kos.3	42378	ENSG00000155265	GOLGA7B	golgin A7 family member B
chr10	99913162	99914425	1264	*	MACS_peak_2859	52.86	Intron (uc001kow.4/27291, intron 1 of 8)	10	99894381	100004654	110274	1	27291	uc009xvy.3	18781	ENSG00000166024	R3HCC1L	R3H domain and coiled-coil containing 1 like
chr10	100174410	100175527	1118	*	MACS_peak_2863	56.34	Promoter (<=1kb)	10	100143322	100174978	31657	2	84795	uc001kpc.3	0	ENSG00000119943	PYROXD2	pyridine nucleotide-disulphide oxidoreductase domain 2
chr10	100205711	100207070	1360	*	MACS_peak_2864	141.99	Promoter (<=1kb)	10	100175955	100206704	30750	2	3257	uc021pwv.1	0	ENSG00000107521	HPS1	HPS1, biogenesis of lysosomal organelles complex 3 subunit 1
chr10	100247794	100248818	1025	*	MACS_peak_2865	222.87	Intron (uc001kpn.2/60495, intron 10 of 11)	10	100188903	100206704	17802	2	3257	uc001kpl.3	-41090	ENSG00000107521	HPS1	HPS1, biogenesis of lysosomal organelles complex 3 subunit 1
chr10	100269916	100270779	864	*	MACS_peak_2866	53.1	Intron (uc001kpn.2/60495, intron 9 of 11)	10	100188903	100206704	17802	2	3257	uc001kpl.3	-63212	ENSG00000107521	HPS1	HPS1, biogenesis of lysosomal organelles complex 3 subunit 1
chr10	100286712	100287635	924	*	MACS_peak_2867	125.92	Intron (uc001kpn.2/60495, intron 9 of 11)	10	100188903	100206704	17802	2	3257	uc001kpl.3	-80008	ENSG00000107521	HPS1	HPS1, biogenesis of lysosomal organelles complex 3 subunit 1
chr10	100297581	100298246	666	*	MACS_peak_2868	70.69	Intron (uc001kpn.2/60495, intron 9 of 11)	10	100188903	100206704	17802	2	3257	uc001kpl.3	-90877	ENSG00000107521	HPS1	HPS1, biogenesis of lysosomal organelles complex 3 subunit 1
chr10	100384489	100385153	665	*	MACS_peak_2869	99.48	Intron (uc001kpn.2/60495, intron 7 of 11)	10	100188903	100206704	17802	2	3257	uc001kpl.3	-177785	ENSG00000107521	HPS1	HPS1, biogenesis of lysosomal organelles complex 3 subunit 1
chr10	100398429	100399365	937	*	MACS_peak_2870	161.53	Intron (uc001kpn.2/60495, intron 7 of 11)	10	100188903	100206704	17802	2	3257	uc001kpl.3	-191725	ENSG00000107521	HPS1	HPS1, biogenesis of lysosomal organelles complex 3 subunit 1
chr10	100580851	100581681	831	*	MACS_peak_2871	59.4	Intron (uc001kpn.2/60495, intron 3 of 11)	10	100188903	100206704	17802	2	3257	uc001kpl.3	-374147	ENSG00000107521	HPS1	HPS1, biogenesis of lysosomal organelles complex 3 subunit 1
chr10	100593264	100593784	521	*	MACS_peak_2872	57.16	Intron (uc001kpn.2/60495, intron 3 of 11)	10	100188903	100206704	17802	2	3257	uc001kpl.3	-386560	ENSG00000107521	HPS1	HPS1, biogenesis of lysosomal organelles complex 3 subunit 1
chr10	100984093	100984821	729	*	MACS_peak_2873	90.9	Intron (uc001kpn.2/60495, intron 2 of 11)	10	100216834	100995632	778799	2	60495	uc001kpn.2	10811	ENSG00000172987	HPSE2	heparanase 2 (inactive)
chr10	101542057	101542754	698	*	MACS_peak_2878	68.26	Promoter (<=1kb)	10	101542463	101611662	69200	1	1244	uc001kqf.2	0	ENSG00000023839	ABCC2	ATP binding cassette subfamily C member 2
chr10	101564854	101565764	911	*	MACS_peak_2879	110.08	Exon (uc001kqf.2/1244, exon 11 of 32)	10	101542463	101611662	69200	1	1244	uc001kqf.2	22391	ENSG00000023839	ABCC2	ATP binding cassette subfamily C member 2
chr10	101665961	101666712	752	*	MACS_peak_2880	84.3	Intron (uc001kqg.2/23268, intron 3 of 13)	10	101635334	101673838	38505	2	23268	uc001kqg.2	7126	ENSG00000107554	DNMBP	dynamin binding protein
chr10	101753864	101754665	802	*	MACS_peak_2881	334.12	Intron (uc001kqj.2/23268, intron 1 of 16)	10	101635334	101769676	134343	2	23268	uc001kqj.2	15011	ENSG00000107554	DNMBP	dynamin binding protein
chr10	101945185	101946231	1047	*	MACS_peak_2882	50.67	Promoter (<=1kb)	10	101909847	101945734	35888	2	10613	uc001kqn.4	0	ENSG00000107566	ERLIN1	ER lipid raft associated 1
chr10	102105876	102107253	1378	*	MACS_peak_2883	140.18	Promoter (<=1kb)	10	102106772	102124588	17817	1	6319	uc001kqy.3	0	ENSG00000099194	SCD	stearoyl-CoA desaturase
chr10	102116190	102117394	1205	*	MACS_peak_2884	50.3	Exon (uc001kqy.3/6319, exon 5 of 6)	10	102106772	102124588	17817	1	6319	uc001kqy.3	9418	ENSG00000099194	SCD	stearoyl-CoA desaturase
chr10	102124467	102125348	882	*	MACS_peak_2885	184.95	3' UTR	10	102133333	102148111	14779	1	90271	uc001kqz.4	-7985	ENSG00000235823	OLMALINC	oligodendrocyte maturation-associated long intergenic non-coding RNA
chr10	102132661	102134494	1834	*	MACS_peak_2886	235.57	Promoter (<=1kb)	10	102133333	102148111	14779	1	90271	uc001kqz.4	0	ENSG00000235823	OLMALINC	oligodendrocyte maturation-associated long intergenic non-coding RNA
chr10	102669092	102669911	820	*	MACS_peak_2893	162.97	Promoter (2-3kb)	10	102672326	102673643	1318	1	55719	uc001krq.4	-2415	ENSG00000119906	SLF2	SMC5-SMC6 complex localization factor 2
chr10	102749896	102751130	1235	*	MACS_peak_2894	105.92	Promoter (2-3kb)	10	102747293	102754158	6866	1	56652	uc021pxb.1	2603	ENSG00000107815	TWNK	twinkle mtDNA helicase
chr10	102756097	102760329	4233	*	MACS_peak_2895	464.03	Promoter (<=1kb)	10	102756864	102767593	10730	1	84445	uc001ksj.3	0	ENSG00000107816	LZTS2	leucine zipper tumor suppressor 2
chr10	102790582	102793142	2561	*	MACS_peak_2896	59.24	Promoter (<=1kb)	10	102767440	102790914	23475	2	79955	uc021pxc.1	0	ENSG00000186862	PDZD7	PDZ domain containing 7
chr10	102845307	102846272	966	*	MACS_peak_2897	64.08	Downstream (2-3kb)	10	102822260	102824178	1919	1	81621	uc001kst.1	23047	ENSG00000107821	KAZALD1	Kazal type serine peptidase inhibitor domain 1
chr10	103019706	103020325	620	*	MACS_peak_2900	94.07	Intron (uc001ksy.1/uc001ksy.1, intron 2 of 2)	10	102989351	102998616	9266	1	399806	uc010qpy.2	30355	NA	LBX1-AS1	LBX1 antisense RNA 1 (head to head)
chr10	103175445	103176078	634	*	MACS_peak_2901	52.86	Intron (uc001ksz.2/8945, intron 1 of 1)	10	103113790	103317078	203289	1	8945	uc001ktc.4	61655	ENSG00000166167	BTRC	beta-transducin repeat containing E3 ubiquitin protein ligase
chr10	103413121	103413881	761	*	MACS_peak_2902	53.97	Intron (uc001kto.3/6468, intron 5 of 8)	10	103370421	103454743	84323	2	6468	uc001kto.3	40862	ENSG00000107829	FBXW4	F-box and WD repeat domain containing 4
chr10	103639193	103640349	1157	*	MACS_peak_2903	283.8	Intron (uc009xwx.1/79591, intron 6 of 7)	10	103587398	103603677	16280	2	30819	uc010qqi.2	-35516	ENSG00000120049	KCNIP2	potassium voltage-gated channel interacting protein 2
chr10	103876648	103878371	1724	*	MACS_peak_2904	255.24	Promoter (1-2kb)	10	103867325	103880210	12886	2	8861	uc009xwz.3	1839	ENSG00000198728	LDB1	LIM domain binding 1
chr10	103878493	103880923	2431	*	MACS_peak_2905	303.38	Promoter (<=1kb)	10	103867325	103880210	12886	2	8861	uc009xwz.3	0	ENSG00000198728	LDB1	LIM domain binding 1
chr10	103892588	103893963	1376	*	MACS_peak_2906	126.81	Promoter (<=1kb)	10	103892787	103910090	17304	1	23082	uc001kum.3	0	ENSG00000148840	PPRC1	peroxisome proliferator-activated receptor gamma, coactivator-related 1
chr10	103996777	103997418	642	*	MACS_peak_2907	69.98	Intron (uc001kuu.1/5309, intron 1 of 3)	10	103989946	104001231	11286	2	5309	uc001kuu.1	3813	ENSG00000107859	PITX3	paired like homeodomain 3
chr10	104229393	104231171	1779	*	MACS_peak_2908	54.59	Promoter (1-2kb)	10	104227915	104232006	4092	1	79847	uc001kvu.3	1478	ENSG00000138111	MFSD13A	major facilitator superfamily domain containing 13A
chr10	104401502	104402354	853	*	MACS_peak_2909	426.48	Promoter (1-2kb)	10	104404252	104418076	13825	1	81603	uc001kvz.2	-1898	ENSG00000171206	TRIM8	tripartite motif containing 8
chr10	104438281	104439387	1107	*	MACS_peak_2910	67.87	Intron (uc001kwa.3/403, intron 5 of 5)	10	104404252	104418076	13825	1	81603	uc001kvz.2	34029	ENSG00000171206	TRIM8	tripartite motif containing 8
chr10	104518237	104518835	599	*	MACS_peak_2911	197.97	Intron (uc001kwf.4/54838, intron 1 of 3)	10	104503727	104591851	88125	1	54838	uc009xxg.1	14510	ENSG00000166272	WBP1L	WW domain binding protein 1 like
chr10	104542529	104543684	1156	*	MACS_peak_2912	149.43	Intron (uc001kwf.4/54838, intron 1 of 3)	10	104535888	104576021	40134	1	54838	uc001kwe.4	6641	ENSG00000166272	WBP1L	WW domain binding protein 1 like
chr10	104552687	104553563	877	*	MACS_peak_2913	74.31	Intron (uc001kwf.4/54838, intron 1 of 3)	10	104535888	104576021	40134	1	54838	uc001kwe.4	16799	ENSG00000166272	WBP1L	WW domain binding protein 1 like
chr10	104555830	104556774	945	*	MACS_peak_2914	160.64	Intron (uc001kwf.4/54838, intron 1 of 3)	10	104535888	104576021	40134	1	54838	uc001kwe.4	19942	ENSG00000166272	WBP1L	WW domain binding protein 1 like
chr10	104615483	104616328	846	*	MACS_peak_2915	65.9	Promoter (1-2kb)	10	104613967	104624718	10752	1	119032	uc001kwi.2	1516	ENSG00000166275	BORCS7	BLOC-1 related complex subunit 7
chr10	104676916	104679598	2683	*	MACS_peak_2916	176.71	Promoter (<=1kb)	10	104678075	104687375	9301	1	54805	uc001kwl.3	0	ENSG00000148842	CNNM2	cyclin and CBS domain divalent metal cation transport mediator 2
chr10	104745403	104746195	793	*	MACS_peak_2917	52.66	Intron (uc001kwm.3/54805, intron 1 of 7)	10	104678075	104838344	160270	1	54805	uc001kwn.3	67328	ENSG00000148842	CNNM2	cyclin and CBS domain divalent metal cation transport mediator 2
chr10	105437492	105439574	2083	*	MACS_peak_2919	707.39	Intron (uc010qqr.2/9644, intron 1 of 7)	10	105353784	105428432	74649	2	9644	uc010qqs.1	-9060	ENSG00000107957	SH3PXD2A	SH3 and PX domains 2A
chr10	105446775	105448083	1309	*	MACS_peak_2920	76.09	Intron (uc010qqr.2/9644, intron 1 of 7)	10	105348285	105452934	104650	2	9644	uc010qqr.2	4851	ENSG00000107957	SH3PXD2A	SH3 and PX domains 2A
chr10	105469029	105469928	900	*	MACS_peak_2921	234.21	Intron (uc010qqu.1/9644, intron 3 of 11)	10	105353784	105453381	99598	2	9644	uc009xxn.1	-15648	ENSG00000107957	SH3PXD2A	SH3 and PX domains 2A
chr10	105486669	105488330	1662	*	MACS_peak_2922	100.8	Intron (uc010qqu.1/9644, intron 2 of 11)	10	105353784	105496624	142841	2	9644	uc010qqu.1	8294	ENSG00000107957	SH3PXD2A	SH3 and PX domains 2A
chr10	105511285	105512072	788	*	MACS_peak_2923	50.43	Intron (uc001kxk.2/100505839, intron 2 of 2)	10	105506537	105515167	8631	1	100505839	uc001kxk.2	4748	ENSG00000280693	SH3PXD2A-AS1	SH3PXD2A antisense RNA 1
chr10	105527357	105528231	875	*	MACS_peak_2924	81.67	Intron (uc001kxj.1/9644, intron 2 of 13)	10	105506537	105515167	8631	1	100505839	uc001kxk.2	20820	ENSG00000280693	SH3PXD2A-AS1	SH3PXD2A antisense RNA 1
chr10	106013934	106015838	1905	*	MACS_peak_2927	65.15	Promoter (<=1kb)	10	106013952	106027222	13271	1	9446	uc021pxr.1	0	ENSG00000148834	GSTO1	glutathione S-transferase omega 1
chr10	106589720	106590533	814	*	MACS_peak_2928	373.03	Intron (uc001kyi.1/22986, intron 1 of 26)	10	106400859	107024993	624135	1	22986	uc001kyi.1	188861	ENSG00000156395	SORCS3	sortilin related VPS10 domain containing receptor 3
chr10	106738947	106739798	852	*	MACS_peak_2929	83.67	Intron (uc001kyi.1/22986, intron 4 of 26)	10	106937525	107012664	75140	1	22986	uc010qqz.1	-197727	ENSG00000156395	SORCS3	sortilin related VPS10 domain containing receptor 3
chr10	106845473	106846422	950	*	MACS_peak_2930	641.54	Intron (uc001kyi.1/22986, intron 5 of 26)	10	106937525	107012664	75140	1	22986	uc010qqz.1	-91103	ENSG00000156395	SORCS3	sortilin related VPS10 domain containing receptor 3
chr10	108555004	108555724	721	*	MACS_peak_2936	83	Intron (uc001kyl.3/114815, intron 3 of 26)	10	108333421	108924466	591046	2	114815	uc001kyl.3	368742	ENSG00000108018	SORCS1	sortilin related VPS10 domain containing receptor 1
chr10	108653683	108654328	646	*	MACS_peak_2937	53.1	Intron (uc001kyl.3/114815, intron 2 of 26)	10	108333421	108924466	591046	2	114815	uc001kyl.3	270138	ENSG00000108018	SORCS1	sortilin related VPS10 domain containing receptor 1
chr10	108700914	108701519	606	*	MACS_peak_2938	112.08	Intron (uc001kyl.3/114815, intron 2 of 26)	10	108333421	108924466	591046	2	114815	uc001kyl.3	222947	ENSG00000108018	SORCS1	sortilin related VPS10 domain containing receptor 1
chr10	111639858	111641543	1686	*	MACS_peak_2957	316.41	Promoter (2-3kb)	10	111635286	111644030	8745	2	7511	uc010qra.1	2487	ENSG00000108039	XPNPEP1	X-prolyl aminopeptidase 1
chr10	111643507	111644535	1029	*	MACS_peak_2958	163.17	Promoter (<=1kb)	10	111635286	111644030	8745	2	7511	uc010qra.1	0	ENSG00000108039	XPNPEP1	X-prolyl aminopeptidase 1
chr10	111657748	111659475	1728	*	MACS_peak_2959	377.92	Intron (uc001kyp.2/7511, intron 3 of 20)	10	111635286	111644030	8745	2	7511	uc010qra.1	-13718	ENSG00000108039	XPNPEP1	X-prolyl aminopeptidase 1
chr10	112064539	112065261	723	*	MACS_peak_2961	318.76	Promoter (<=1kb)	10	112052798	112064707	11910	2	10285	uc001kzc.4	0	ENSG00000119953	SMNDC1	survival motor neuron domain containing 1
chr10	112326668	112328016	1349	*	MACS_peak_2963	150.05	Promoter (<=1kb)	10	112327449	112364392	36944	1	9126	uc001kze.3	0	ENSG00000108055	SMC3	structural maintenance of chromosomes 3
chr10	112400697	112401627	931	*	MACS_peak_2964	180.78	Promoter (2-3kb)	10	112404155	112599227	195073	1	282996	uc001kzf.2	-2528	ENSG00000203867	RBM20	RNA binding motif protein 20
chr10	112473721	112474658	938	*	MACS_peak_2965	105.99	Intron (uc001kzf.2/282996, intron 1 of 13)	10	112404155	112599227	195073	1	282996	uc001kzf.2	69566	ENSG00000203867	RBM20	RNA binding motif protein 20
chr10	112562114	112563034	921	*	MACS_peak_2966	61.21	Intron (uc001kzf.2/282996, intron 7 of 13)	10	112628648	112630662	2015	2	282997	uc010qrd.1	67628	NA	PDCD4-AS1	PDCD4 antisense RNA 1
chr10	114087804	114088832	1029	*	MACS_peak_2977	208.47	Intron (uc010qri.2/390003, intron 10 of 18)	10	114067936	114116353	48418	2	390003	uc010qri.2	27521	ENSG00000243316	GUCY2GP	guanylate cyclase 2G, pseudogene
chr10	114116191	114117080	890	*	MACS_peak_2978	170.89	Promoter (<=1kb)	10	114067936	114116353	48418	2	390003	uc010qri.2	0	ENSG00000243316	GUCY2GP	guanylate cyclase 2G, pseudogene
chr10	114290450	114291215	766	*	MACS_peak_2979	481.65	Intron (uc001kzy.3/143187, intron 4 of 7)	10	114194055	114207306	13252	2	64429	uc009xya.1	-83144	ENSG00000023041	ZDHHC6	zinc finger DHHC-type containing 6
chr10	114391042	114391728	687	*	MACS_peak_2980	80.56	Promoter (2-3kb)	10	114393929	114394013	85	1	100422909	uc021pyf.1	-2201	ENSG00000264763	MIR4295	microRNA 4295
chr10	114751150	114752458	1309	*	MACS_peak_2982	61.69	Intron (uc001lac.4/6934, intron 3 of 13)	10	114710882	114927436	216555	1	6934	uc010qrt.2	40268	ENSG00000148737	TCF7L2	transcription factor 7 like 2
chr10	114912994	114913907	914	*	MACS_peak_2983	68.1	Intron (uc001lac.4/6934, intron 10 of 13)	10	114889392	114927436	38045	1	6934	uc010qrx.2	23602	ENSG00000148737	TCF7L2	transcription factor 7 like 2
chr10	115391549	115392437	889	*	MACS_peak_2993	129.3	Promoter (2-3kb)	10	115348583	115388780	40198	2	4892	uc009xyb.3	-2769	ENSG00000197893	NRAP	nebulin related anchoring protein
chr10	115466237	115466983	747	*	MACS_peak_2994	249.96	Promoter (2-3kb)	10	115469104	115490668	21565	1	840	uc010qsb.3	-2121	ENSG00000165806	CASP7	caspase 7
chr10	116112413	116113260	848	*	MACS_peak_2997	291.39	Intron (uc001lbn.3/84632, intron 1 of 18)	10	116054583	116064705	10123	2	84632	uc010qsd.2	-47708	ENSG00000169129	AFAP1L2	actin filament associated protein 1 like 2
chr10	116248949	116250041	1093	*	MACS_peak_2998	188.12	Promoter (1-2kb)	10	116190869	116251637	60769	2	3983	uc021pyu.1	1596	ENSG00000099204	ABLIM1	actin binding LIM protein 1
chr10	116252139	116253073	935	*	MACS_peak_2999	232.11	Promoter (<=1kb)	10	116190869	116251637	60769	2	3983	uc021pyu.1	-502	ENSG00000099204	ABLIM1	actin binding LIM protein 1
chr10	116302940	116303783	844	*	MACS_peak_3000	105.38	Intron (uc021pyw.1/3983, intron 6 of 21)	10	116200776	116286685	85910	2	3983	uc021pzc.1	-16255	ENSG00000099204	ABLIM1	actin binding LIM protein 1
chr10	116440964	116441855	892	*	MACS_peak_3001	129.01	Promoter (2-3kb)	10	116190869	116444414	253546	2	3983	uc021pyy.1	2559	ENSG00000099204	ABLIM1	actin binding LIM protein 1
chr10	116456433	116457516	1084	*	MACS_peak_3002	115.92	Intron (uc001lbz.1/3983, intron 1 of 1)	10	116200776	116444414	243639	2	3983	uc021pzf.1	-12019	ENSG00000099204	ABLIM1	actin binding LIM protein 1
chr10	116474018	116474774	757	*	MACS_peak_3003	66.89	Intron (uc001lbz.1/3983, intron 1 of 1)	10	116200776	116444414	243639	2	3983	uc021pzf.1	-29604	ENSG00000099204	ABLIM1	actin binding LIM protein 1
chr10	116659556	116660360	805	*	MACS_peak_3004	109.95	3' UTR	10	116697915	116737439	39525	1	142940	uc010qsl.2	-37555	ENSG00000165832	TRUB1	TruB pseudouridine synthase family member 1
chr10	117592584	117593228	645	*	MACS_peak_3006	112.95	Intron (uc001lcg.3/26033, intron 27 of 28)	10	117816442	118031819	215378	2	2674	uc001lci.3	438591	ENSG00000151892	GFRA1	GDNF family receptor alpha 1
chr10	117822421	117823304	884	*	MACS_peak_3009	73.24	3' UTR	10	117816442	118031819	215378	2	2674	uc001lci.3	208515	ENSG00000151892	GFRA1	GDNF family receptor alpha 1
chr10	117840083	117840749	667	*	MACS_peak_3010	197.06	Intron (uc001lci.3/2674, intron 7 of 8)	10	117816442	118031819	215378	2	2674	uc001lci.3	191070	ENSG00000151892	GFRA1	GDNF family receptor alpha 1
chr10	117865853	117866648	796	*	MACS_peak_3011	90.6	Intron (uc001lci.3/2674, intron 4 of 8)	10	117816442	118031819	215378	2	2674	uc001lci.3	165171	ENSG00000151892	GFRA1	GDNF family receptor alpha 1
chr10	118397028	118397811	784	*	MACS_peak_3013	157.91	Intron (uc001lcq.3/5408, intron 11 of 14)	10	118380465	118404654	24190	1	5408	uc001lcq.3	16563	ENSG00000266200	PNLIPRP2	pancreatic lipase related protein 2 (gene/pseudogene)
chr10	118451664	118453065	1402	*	MACS_peak_3014	128.5	Exon (uc001lct.3/259217, exon 6 of 12)	10	118423797	118429775	5979	2	143379	uc001lcs.1	-21889	ENSG00000165863	C10orf82	chromosome 10 open reading frame 82
chr10	118464781	118465520	740	*	MACS_peak_3015	50.24	5' UTR	10	118423797	118429775	5979	2	143379	uc001lcs.1	-35006	ENSG00000165863	C10orf82	chromosome 10 open reading frame 82
chr10	118506592	118507507	916	*	MACS_peak_3016	559.24	Intron (uc001lcu.3/259217, intron 2 of 13)	10	118430703	118502085	71383	2	259217	uc001lct.3	-4507	ENSG00000165868	HSPA12A	heat shock protein family A (Hsp70) member 12A
chr10	118512267	118513893	1627	*	MACS_peak_3017	114.27	Intron (uc001lcu.3/259217, intron 2 of 13)	10	118430703	118502085	71383	2	259217	uc001lct.3	-10182	ENSG00000165868	HSPA12A	heat shock protein family A (Hsp70) member 12A
chr10	118538191	118539835	1645	*	MACS_peak_3018	63.89	Intron (uc001lcu.3/259217, intron 2 of 13)	10	118430703	118502085	71383	2	259217	uc001lct.3	-36106	ENSG00000165868	HSPA12A	heat shock protein family A (Hsp70) member 12A
chr10	118579545	118580429	885	*	MACS_peak_3019	184.43	Intron (uc001lcu.3/259217, intron 2 of 13)	10	118609023	118642112	33090	1	387712	uc001lcw.3	-28594	ENSG00000188316	ENO4	enolase family member 4
chr10	118627007	118627795	789	*	MACS_peak_3020	190.02	Intron (uc001lcw.3/387712, intron 1 of 6)	10	118430703	118609716	179014	2	259217	uc001lcu.3	-17291	ENSG00000165868	HSPA12A	heat shock protein family A (Hsp70) member 12A
chr10	118691230	118692057	828	*	MACS_peak_3021	91.07	Intron (uc021pzk.1/57698, intron 9 of 18)	10	118642888	118733681	90794	2	57698	uc001lcy.5	41624	ENSG00000187164	SHTN1	shootin 1
chr10	118785333	118786248	916	*	MACS_peak_3022	114.86	Intron (uc010qsq.1/57698, intron 2 of 17)	10	118659823	118765088	105266	2	57698	uc010qsp.1	-20245	ENSG00000187164	SHTN1	shootin 1
chr10	119134815	119136033	1219	*	MACS_peak_3025	54.12	Promoter (<=1kb)	10	119042606	119134937	92332	2	118987	uc001lde.1	0	ENSG00000165650	PDZD8	PDZ domain containing 8
chr10	120353285	120354962	1678	*	MACS_peak_3038	82.98	Promoter (<=1kb)	10	120352916	120355160	2245	2	2834	uc001ldp.1	198	ENSG00000119973	PRLHR	prolactin releasing hormone receptor
chr10	120457828	120458400	573	*	MACS_peak_3039	75.19	Intron (uc010qst.1/143384, intron 5 of 9)	10	120433634	120514758	81125	2	143384	uc010qst.1	56358	ENSG00000151893	CACUL1	CDK2 associated cullin domain 1
chr10	120514049	120515501	1453	*	MACS_peak_3040	571.38	Promoter (<=1kb)	10	120433634	120514758	81125	2	143384	uc010qst.1	0	ENSG00000151893	CACUL1	CDK2 associated cullin domain 1
chr10	120789272	120790570	1299	*	MACS_peak_3046	51.9	Promoter (<=1kb)	10	120789228	120793854	4627	1	340719	uc009xzf.1	44	ENSG00000188613	NANOS1	nanos C2HC-type zinc finger 1
chr10	120835243	120835847	605	*	MACS_peak_3047	51.11	Intron (uc010qsu.2/8661, intron 1 of 21)	10	120794541	120840031	45491	2	8661	uc010qsu.2	4184	ENSG00000107581	EIF3A	eukaryotic translation initiation factor 3 subunit A
chr10	120839465	120840821	1357	*	MACS_peak_3048	257.9	Promoter (<=1kb)	10	120794541	120840031	45491	2	8661	uc010qsu.2	0	ENSG00000107581	EIF3A	eukaryotic translation initiation factor 3 subunit A
chr10	120863503	120864909	1407	*	MACS_peak_3049	120.28	Promoter (<=1kb)	10	120863611	120897376	33766	1	55855	uc001ldw.3	0	NA	FAM45BP	family with sequence similarity 45, member A pseudogene
chr10	120918707	120919497	791	*	MACS_peak_3050	102.24	Promoter (1-2kb)	10	120900425	120920657	20233	2	119559	uc001ldy.3	1160	ENSG00000183605	SFXN4	sideroflexin 4
chr10	120924548	120925785	1238	*	MACS_peak_3051	77.4	Promoter (<=1kb)	10	120900425	120925204	24780	2	119559	uc001lea.3	0	ENSG00000183605	SFXN4	sideroflexin 4
chr10	121036125	121037047	923	*	MACS_peak_3052	105.06	Intron (uc001led.3/2869, intron 1 of 15)	10	120967935	121196353	228419	1	2869	uc010qta.1	68190	ENSG00000198873	GRK5	G protein-coupled receptor kinase 5
chr10	121038769	121039864	1096	*	MACS_peak_3053	122.58	Intron (uc001led.3/2869, intron 1 of 15)	10	120967935	121196353	228419	1	2869	uc010qta.1	70834	ENSG00000198873	GRK5	G protein-coupled receptor kinase 5
chr10	121052840	121054575	1736	*	MACS_peak_3054	52.86	Intron (uc001led.3/2869, intron 1 of 15)	10	121137484	121137555	72	1	100616398	uc021pzq.1	-82909	ENSG00000265719	MIR4681	microRNA 4681
chr10	121110931	121111863	933	*	MACS_peak_3055	103.34	Intron (uc001led.3/2869, intron 2 of 15)	10	121137484	121137555	72	1	100616398	uc021pzq.1	-25621	ENSG00000265719	MIR4681	microRNA 4681
chr10	121171328	121172417	1090	*	MACS_peak_3056	431.15	Intron (uc001led.3/2869, intron 4 of 15)	10	121137484	121137555	72	1	100616398	uc021pzq.1	33844	ENSG00000265719	MIR4681	microRNA 4681
chr10	121192466	121193406	941	*	MACS_peak_3057	90.51	Intron (uc001led.3/2869, intron 8 of 15)	10	121137484	121137555	72	1	100616398	uc021pzq.1	54982	ENSG00000265719	MIR4681	microRNA 4681
chr10	121255630	121256583	954	*	MACS_peak_3060	58.68	Downstream (2-3kb)	10	121259339	121286961	27623	2	6001	uc001lee.3	30378	ENSG00000148908	RGS10	regulator of G protein signaling 10
chr10	121259754	121261029	1276	*	MACS_peak_3061	59.94	Exon (uc001lee.3/6001, exon 4 of 4)	10	121259339	121286961	27623	2	6001	uc001lee.3	25932	ENSG00000148908	RGS10	regulator of G protein signaling 10
chr10	121275884	121277929	2046	*	MACS_peak_3062	55.31	Intron (uc001lee.3/6001, intron 2 of 3)	10	121259339	121286961	27623	2	6001	uc001lee.3	9032	ENSG00000148908	RGS10	regulator of G protein signaling 10
chr10	121284466	121285271	806	*	MACS_peak_3063	69.8	Promoter (1-2kb)	10	121259339	121286961	27623	2	6001	uc001lee.3	1690	ENSG00000148908	RGS10	regulator of G protein signaling 10
chr10	121651106	121652608	1503	*	MACS_peak_3065	247.14	Promoter (<=1kb)	10	121652085	121704170	52086	1	11196	uc001leu.2	0	ENSG00000107651	SEC23IP	SEC23 interacting protein
chr10	123327499	123328355	857	*	MACS_peak_3086	87.16	Intron (uc021pzv.1/2263, intron 1 of 14)	10	123237844	123353481	115638	2	2263	uc021pzv.1	25126	ENSG00000066468	FGFR2	fibroblast growth factor receptor 2
chr10	123736117	123736805	689	*	MACS_peak_3089	64.11	Promoter (1-2kb)	10	123721272	123734743	13472	2	54780	uc001lfu.2	-1374	ENSG00000107672	NSMCE4A	NSE4 homolog A, SMC5-SMC6 complex component
chr10	123975965	123976911	947	*	MACS_peak_3090	121.69	Exon (uc001lfv.3/10579, exon 11 of 23)	10	123969557	124014057	44501	1	10579	uc001lgb.3	6408	ENSG00000138162	TACC2	transforming acidic coiled-coil containing protein 2
chr10	124038047	124038944	898	*	MACS_peak_3091	72.87	Intron (uc001lgc.1/118663, intron 3 of 15)	10	124030821	124097676	66856	1	118663	uc001lgd.1	7226	ENSG00000138152	BTBD16	BTB domain containing 16
chr10	124044921	124045849	929	*	MACS_peak_3092	108.03	Exon (uc001lgc.1/118663, exon 5 of 16)	10	124030821	124097676	66856	1	118663	uc001lgd.1	14100	ENSG00000138152	BTBD16	BTB domain containing 16
chr10	124061067	124061867	801	*	MACS_peak_3093	75.51	Intron (uc001lgc.1/118663, intron 9 of 15)	10	124030821	124097676	66856	1	118663	uc001lgd.1	30246	ENSG00000138152	BTBD16	BTB domain containing 16
chr10	124227739	124228755	1017	*	MACS_peak_3096	71.15	Intron (uc001lgj.2/5654, intron 1 of 8)	10	124221041	124274424	53384	1	5654	uc001lgj.2	6698	ENSG00000166033	HTRA1	HtrA serine peptidase 1
chr10	124241356	124242208	853	*	MACS_peak_3097	72.87	Intron (uc001lgj.2/5654, intron 1 of 8)	10	124221041	124274424	53384	1	5654	uc001lgj.2	20315	ENSG00000166033	HTRA1	HtrA serine peptidase 1
chr10	124348801	124349718	918	*	MACS_peak_3099	53.1	Intron (uc001lgk.1/1755, intron 17 of 52)	10	124357490	124403252	45763	1	1755	uc009yab.1	-7772	ENSG00000187908	DMBT1	deleted in malignant brain tumors 1
chr10	124913400	124915009	1610	*	MACS_peak_3103	82.04	Promoter (<=1kb)	10	124913760	124921929	8170	1	9184	uc009yah.2	0	ENSG00000154473	BUB3	BUB3, mitotic checkpoint protein
chr10	125501729	125502977	1249	*	MACS_peak_3112	120.47	Intron (uc001lhj.3/119587, intron 15 of 19)	10	125425871	125456913	31043	1	2849	uc001lhh.3	75858	ENSG00000154478	GPR26	G protein-coupled receptor 26
chr10	125686109	125686977	869	*	MACS_peak_3113	53.9	Intron (uc001lhj.3/119587, intron 2 of 19)	10	125465726	125699779	234054	2	119587	uc001lhj.3	12802	ENSG00000121898	CPXM2	carboxypeptidase X, M14 family member 2
chr10	126245840	126247286	1447	*	MACS_peak_3118	109.96	Intron (uc001lhs.2/64077, intron 6 of 6)	10	126293770	126302710	8941	1	64077	uc009yaj.2	-46484	ENSG00000107902	LHPP	phospholysine phosphohistidine inorganic pyrophosphate phosphatase
chr10	126269614	126270281	668	*	MACS_peak_3119	53.1	Intron (uc001lhs.2/64077, intron 6 of 6)	10	126293770	126302710	8941	1	64077	uc009yaj.2	-23489	ENSG00000107902	LHPP	phospholysine phosphohistidine inorganic pyrophosphate phosphatase
chr10	126375048	126376091	1044	*	MACS_peak_3120	54.81	Intron (uc001lhu.1/9679, intron 7 of 8)	10	126307863	126432930	125068	2	9679	uc001lhv.1	56839	ENSG00000189319	FAM53B	family with sequence similarity 53 member B
chr10	126393513	126396329	2817	*	MACS_peak_3121	353.3	5' UTR	10	126307863	126432930	125068	2	9679	uc001lhv.1	36601	ENSG00000189319	FAM53B	family with sequence similarity 53 member B
chr10	126406334	126407454	1121	*	MACS_peak_3122	83.74	Intron (uc001lhu.1/9679, intron 5 of 8)	10	126307863	126432930	125068	2	9679	uc001lhv.1	25476	ENSG00000189319	FAM53B	family with sequence similarity 53 member B
chr10	126411951	126414276	2326	*	MACS_peak_3123	157.79	Intron (uc001lhu.1/9679, intron 5 of 8)	10	126307863	126432930	125068	2	9679	uc001lhv.1	18654	ENSG00000189319	FAM53B	family with sequence similarity 53 member B
chr10	126418210	126419639	1430	*	MACS_peak_3124	58.2	Intron (uc001lhu.1/9679, intron 5 of 8)	10	126307863	126432930	125068	2	9679	uc001lhv.1	13291	ENSG00000189319	FAM53B	family with sequence similarity 53 member B
chr10	126421405	126422735	1331	*	MACS_peak_3125	216.19	Intron (uc001lhu.1/9679, intron 5 of 8)	10	126307863	126432930	125068	2	9679	uc001lhv.1	10195	ENSG00000189319	FAM53B	family with sequence similarity 53 member B
chr10	126425060	126426341	1282	*	MACS_peak_3126	79.19	Intron (uc001lhu.1/9679, intron 5 of 8)	10	126307863	126432930	125068	2	9679	uc001lhv.1	6589	ENSG00000189319	FAM53B	family with sequence similarity 53 member B
chr10	126666335	126667188	854	*	MACS_peak_3127	107.28	Intron (uc010qug.2/54764, intron 6 of 9)	10	126676418	126694582	18165	2	1488	uc001lid.4	27394	ENSG00000175029	CTBP2	C-terminal binding protein 2
chr10	126682870	126684256	1387	*	MACS_peak_3128	90.17	Exon (uc001lid.4/1488, exon 5 of 9)	10	126676418	126694582	18165	2	1488	uc001lid.4	10326	ENSG00000175029	CTBP2	C-terminal binding protein 2
chr10	126687968	126691439	3472	*	MACS_peak_3129	209.76	Intron (uc001lid.4/1488, intron 3 of 8)	10	126676418	126694582	18165	2	1488	uc001lid.4	3143	ENSG00000175029	CTBP2	C-terminal binding protein 2
chr10	127268957	127269862	906	*	MACS_peak_3133	78.3	Intron (uc001lij.3/387718, intron 3 of 3)	10	127262940	127267014	4075	1	100169752	uc001lii.3	6017	ENSG00000237675	TEX36-AS1	TEX36 antisense RNA 1
chr10	127296052	127296838	787	*	MACS_peak_3134	84.31	Intron (uc001lij.3/387718, intron 3 of 3)	10	127262940	127267014	4075	1	100169752	uc001lii.3	33112	ENSG00000237675	TEX36-AS1	TEX36 antisense RNA 1
chr10	127310719	127311513	795	*	MACS_peak_3135	156.5	Intron (uc001lij.3/387718, intron 3 of 3)	10	127262940	127267014	4075	1	100169752	uc001lii.3	47779	ENSG00000237675	TEX36-AS1	TEX36 antisense RNA 1
chr10	127476941	127478180	1240	*	MACS_peak_3136	100.83	3' UTR	10	127455027	127464390	9364	2	118856	uc001liu.3	-12551	ENSG00000154485	MMP21	matrix metallopeptidase 21
chr10	127483430	127484360	931	*	MACS_peak_3137	276.9	Exon (uc001liw.4/7390, exon 8 of 9)	10	127490626	127496056	5431	2	7390	uc021qap.1	11696	ENSG00000188690	UROS	uroporphyrinogen III synthase
chr10	127511308	127512250	943	*	MACS_peak_3138	72.87	Promoter (<=1kb)	10	127512104	127523219	11116	1	56647	uc021qar.1	0	ENSG00000107949	BCCIP	BRCA2 and CDKN1A interacting protein
chr10	127569494	127570145	652	*	MACS_peak_3139	339.51	Promoter (<=1kb)	10	127524909	127569884	44976	2	55760	uc001ljf.1	0	ENSG00000089876	DHX32	DEAH-box helicase 32 (putative)
chr10	127583563	127586022	2460	*	MACS_peak_3140	106.07	Promoter (<=1kb)	10	127524909	127585027	60119	2	55760	uc001ljg.1	0	ENSG00000089876	DHX32	DEAH-box helicase 32 (putative)
chr10	127819643	127820521	879	*	MACS_peak_3141	620.61	Intron (uc001ljk.2/8038, intron 5 of 22)	10	127668730	127698078	29349	1	92565	uc001lji.3	150913	ENSG00000203780	FANK1	fibronectin type III and ankyrin repeat domains 1
chr10	127887697	127888565	869	*	MACS_peak_3142	114.02	Intron (uc001ljk.2/8038, intron 3 of 22)	10	127702902	128077127	374226	2	8038	uc001ljk.2	188562	ENSG00000148848	ADAM12	ADAM metallopeptidase domain 12
chr10	127897813	127899501	1689	*	MACS_peak_3143	75.43	Intron (uc001ljk.2/8038, intron 3 of 22)	10	127702902	128077127	374226	2	8038	uc001ljk.2	177626	ENSG00000148848	ADAM12	ADAM metallopeptidase domain 12
chr10	127899695	127900702	1008	*	MACS_peak_3144	156.37	Intron (uc001ljk.2/8038, intron 3 of 22)	10	127702902	128077127	374226	2	8038	uc001ljk.2	176425	ENSG00000148848	ADAM12	ADAM metallopeptidase domain 12
chr10	127976425	127978031	1607	*	MACS_peak_3145	129.37	Intron (uc001ljk.2/8038, intron 2 of 22)	10	127702902	128077127	374226	2	8038	uc001ljk.2	99096	ENSG00000148848	ADAM12	ADAM metallopeptidase domain 12
chr10	128021083	128021732	650	*	MACS_peak_3146	85.59	Intron (uc001ljk.2/8038, intron 1 of 22)	10	127702902	128077127	374226	2	8038	uc001ljk.2	55395	ENSG00000148848	ADAM12	ADAM metallopeptidase domain 12
chr10	128300521	128301327	807	*	MACS_peak_3147	110.2	Intron (uc010qum.2/118611, intron 2 of 9)	10	128113574	128359079	245506	2	118611	uc010qum.2	57752	ENSG00000154493	C10orf90	chromosome 10 open reading frame 90
chr10	128303434	128304229	796	*	MACS_peak_3148	199.51	Intron (uc010qum.2/118611, intron 2 of 9)	10	128113574	128359079	245506	2	118611	uc010qum.2	54850	ENSG00000154493	C10orf90	chromosome 10 open reading frame 90
chr10	128324202	128325138	937	*	MACS_peak_3149	160.86	Intron (uc010qum.2/118611, intron 2 of 9)	10	128113574	128359079	245506	2	118611	uc010qum.2	33941	ENSG00000154493	C10orf90	chromosome 10 open reading frame 90
chr10	128328566	128329571	1006	*	MACS_peak_3150	89.03	Intron (uc010qum.2/118611, intron 2 of 9)	10	128113574	128359079	245506	2	118611	uc010qum.2	29508	ENSG00000154493	C10orf90	chromosome 10 open reading frame 90
chr10	128337593	128339787	2195	*	MACS_peak_3151	240.61	Intron (uc010qum.2/118611, intron 1 of 9)	10	128113574	128359079	245506	2	118611	uc010qum.2	19292	ENSG00000154493	C10orf90	chromosome 10 open reading frame 90
chr10	128351467	128353078	1612	*	MACS_peak_3152	285.24	Intron (uc010qum.2/118611, intron 1 of 9)	10	128113574	128359079	245506	2	118611	uc010qum.2	6001	ENSG00000154493	C10orf90	chromosome 10 open reading frame 90
chr10	128358663	128360149	1487	*	MACS_peak_3153	224.43	Promoter (<=1kb)	10	128113574	128359079	245506	2	118611	uc010qum.2	0	ENSG00000154493	C10orf90	chromosome 10 open reading frame 90
chr10	128853318	128854739	1422	*	MACS_peak_3157	194.58	Intron (uc001ljt.3/1793, intron 22 of 51)	10	128821067	128824325	3259	1	1793	uc031pxq.1	32251	ENSG00000150760	DOCK1	dedicator of cytokinesis 1
chr10	129186648	129187519	872	*	MACS_peak_3158	113.8	Intron (uc001ljt.3/1793, intron 38 of 51)	10	129135164	129250780	115617	1	1793	uc009yaq.3	51484	ENSG00000150760	DOCK1	dedicator of cytokinesis 1
chr10	129706055	129707425	1371	*	MACS_peak_3161	620.78	Promoter (<=1kb)	10	129705325	129884164	178840	1	5791	uc009yat.3	730	ENSG00000132334	PTPRE	protein tyrosine phosphatase, receptor type E
chr10	129740785	129741699	915	*	MACS_peak_3162	55.41	Intron (uc001lkb.3/5791, intron 1 of 20)	10	129705325	129884164	178840	1	5791	uc009yat.3	35460	ENSG00000132334	PTPRE	protein tyrosine phosphatase, receptor type E
chr10	129770233	129771320	1088	*	MACS_peak_3163	284.11	Intron (uc001lkb.3/5791, intron 1 of 20)	10	129785544	129866550	81007	1	5791	uc010qup.1	-14224	ENSG00000132334	PTPRE	protein tyrosine phosphatase, receptor type E
chr10	129840363	129841016	654	*	MACS_peak_3164	131.02	Intron (uc001lkb.3/5791, intron 3 of 20)	10	129845813	129884164	38352	1	5791	uc001lkd.3	-4797	ENSG00000132334	PTPRE	protein tyrosine phosphatase, receptor type E
chr10	129922092	129923302	1211	*	MACS_peak_3165	73.32	Promoter (<=1kb)	10	129900843	129924020	23178	2	4288	uc009yav.1	718	ENSG00000148773	MKI67	marker of proliferation Ki-67
chr10	130049146	130050267	1122	*	MACS_peak_3167	126.03	Intron (uc001lkg.1/uc001lkg.1, intron 1 of 6)	10	129894925	129924468	29544	2	4288	uc001lkf.3	-124678	ENSG00000148773	MKI67	marker of proliferation Ki-67
chr10	130115028	130115844	817	*	MACS_peak_3168	87.16	Exon (uc001lkg.1/uc001lkg.1, exon 7 of 7)	10	129894925	129924468	29544	2	4288	uc001lkf.3	-190560	ENSG00000148773	MKI67	marker of proliferation Ki-67
chr10	131320404	131321294	891	*	MACS_peak_3184	277.08	Intron (uc001lkh.2/4255, intron 1 of 4)	10	131265454	131565783	300330	1	4255	uc001lkh.2	54950	ENSG00000170430	MGMT	O-6-methylguanine-DNA methyltransferase
chr10	131451552	131452372	821	*	MACS_peak_3185	100.16	Intron (uc001lkh.2/4255, intron 2 of 4)	10	131265454	131565783	300330	1	4255	uc001lkh.2	186098	ENSG00000170430	MGMT	O-6-methylguanine-DNA methyltransferase
chr10	131463551	131464213	663	*	MACS_peak_3186	145.27	Intron (uc001lkh.2/4255, intron 2 of 4)	10	131641563	131641638	76	2	100422873	uc021qaw.1	177425	ENSG00000266676	MIR4297	microRNA 4297
chr10	131500308	131501172	865	*	MACS_peak_3187	58.52	Intron (uc001lkh.2/4255, intron 2 of 4)	10	131641563	131641638	76	2	100422873	uc021qaw.1	140466	ENSG00000266676	MIR4297	microRNA 4297
chr10	131526787	131527699	913	*	MACS_peak_3188	108.19	Intron (uc001lkh.2/4255, intron 3 of 4)	10	131641563	131641638	76	2	100422873	uc021qaw.1	113939	ENSG00000266676	MIR4297	microRNA 4297
chr10	131674375	131675304	930	*	MACS_peak_3192	135.37	Intron (uc001lki.2/253738, intron 7 of 15)	10	131641563	131641638	76	2	100422873	uc021qaw.1	-32737	ENSG00000266676	MIR4297	microRNA 4297
chr10	131685800	131687025	1226	*	MACS_peak_3193	184.28	Intron (uc001lki.2/253738, intron 6 of 15)	10	131641563	131641638	76	2	100422873	uc021qaw.1	-44162	ENSG00000266676	MIR4297	microRNA 4297
chr10	131701816	131702741	926	*	MACS_peak_3194	58.37	Intron (uc001lki.2/253738, intron 6 of 15)	10	131633496	131762091	128596	2	253738	uc001lki.2	59350	ENSG00000108001	EBF3	early B-cell factor 3
chr10	131749139	131750320	1182	*	MACS_peak_3195	83.56	Intron (uc001lki.2/253738, intron 6 of 15)	10	131633496	131762091	128596	2	253738	uc001lki.2	11771	ENSG00000108001	EBF3	early B-cell factor 3
chr10	131863166	131864155	990	*	MACS_peak_3198	53.49	Exon (uc010qus.2/387723, exon 7 of 8)	10	131904273	131907101	2829	1	119437	uc021qax.1	-40118	ENSG00000233122	CTAGE7P	CTAGE family member 7, pseudogene
chr10	132928273	132929835	1563	*	MACS_peak_3214	56.61	Intron (uc001lkp.3/256536, intron 8 of 11)	10	132896569	133058707	162139	2	256536	uc009yax.1	128872	ENSG00000176769	TCERG1L	transcription elongation regulator 1 like
chr10	132959447	132960896	1450	*	MACS_peak_3215	95.29	Exon (uc009yax.1/256536, exon 5 of 11)	10	132896569	133058707	162139	2	256536	uc009yax.1	97811	ENSG00000176769	TCERG1L	transcription elongation regulator 1 like
chr10	132975337	132976824	1488	*	MACS_peak_3216	102.8	Intron (uc001lkp.3/256536, intron 4 of 11)	10	132896569	133058707	162139	2	256536	uc009yax.1	81883	ENSG00000176769	TCERG1L	transcription elongation regulator 1 like
chr10	132999042	132999867	826	*	MACS_peak_3217	67.19	Intron (uc001lkp.3/256536, intron 4 of 11)	10	132896569	133058707	162139	2	256536	uc009yax.1	58840	ENSG00000176769	TCERG1L	transcription elongation regulator 1 like
chr10	133004419	133005360	942	*	MACS_peak_3218	112.52	Intron (uc001lkp.3/256536, intron 4 of 11)	10	132896569	133058707	162139	2	256536	uc009yax.1	53347	ENSG00000176769	TCERG1L	transcription elongation regulator 1 like
chr10	133041533	133042405	873	*	MACS_peak_3219	106.75	Intron (uc001lkp.3/256536, intron 4 of 11)	10	132896569	133058707	162139	2	256536	uc009yax.1	16302	ENSG00000176769	TCERG1L	transcription elongation regulator 1 like
chr10	133086294	133087916	1623	*	MACS_peak_3220	334.03	Intron (uc001lkp.3/256536, intron 3 of 11)	10	132890655	133109984	219330	2	256536	uc001lkp.3	22068	ENSG00000176769	TCERG1L	transcription elongation regulator 1 like
chr10	133937422	133938504	1083	*	MACS_peak_3235	121.39	Intron (uc001lkx.4/282973, intron 2 of 23)	10	133957220	133982537	25318	1	282973	uc009yba.1	-18716	ENSG00000188385	JAKMIP3	Janus kinase and microtubule interacting protein 3
chr10	133967135	133969609	2475	*	MACS_peak_3236	240.75	Exon (uc001lkx.4/282973, exon 17 of 24)	10	133957220	133982537	25318	1	282973	uc009yba.1	9915	ENSG00000188385	JAKMIP3	Janus kinase and microtubule interacting protein 3
chr10	134003187	134005992	2806	*	MACS_peak_3237	343.05	Promoter (2-3kb)	10	134000414	134019280	18867	1	10570	uc009ybb.3	2773	ENSG00000151640	DPYSL4	dihydropyrimidinase like 4
chr10	134020776	134022530	1755	*	MACS_peak_3238	88.86	3' UTR	10	134000414	134019280	18867	1	10570	uc009ybb.3	20362	ENSG00000151640	DPYSL4	dihydropyrimidinase like 4
chr10	134077120	134078597	1478	*	MACS_peak_3239	93.82	Intron (uc001lld.1/282974, intron 1 of 11)	10	134020996	134062612	41617	2	282974	uc001llc.1	-14508	ENSG00000165752	STK32C	serine/threonine kinase 32C
chr10	134092594	134095055	2462	*	MACS_peak_3240	115.12	Intron (uc001lld.1/282974, intron 1 of 11)	10	134020996	134120716	99721	2	282974	uc001lld.1	25661	ENSG00000165752	STK32C	serine/threonine kinase 32C
chr10	134145190	134146223	1034	*	MACS_peak_3241	58.99	Promoter (<=1kb)	10	134020996	134145356	124361	2	282974	uc010quu.1	0	ENSG00000165752	STK32C	serine/threonine kinase 32C
chr10	134168055	134169296	1242	*	MACS_peak_3242	62.16	Exon (uc001llg.2/80313, exon 8 of 12)	10	134150611	134180509	29899	1	80313	uc001llk.4	17444	ENSG00000148814	LRRC27	leucine rich repeat containing 27
chr10	134211100	134212359	1260	*	MACS_peak_3243	249.49	Promoter (<=1kb)	10	134210702	134231358	20657	1	170394	uc009ybe.3	398	ENSG00000171813	PWWP2B	PWWP domain containing 2B
chr10	134371214	134374271	3058	*	MACS_peak_3246	191.01	Intron (uc001llo.1/3632, intron 1 of 12)	10	134351353	134596984	245632	1	3632	uc001llp.3	19861	ENSG00000068383	INPP5A	inositol polyphosphate-5-phosphatase A
chr10	134375162	134376881	1720	*	MACS_peak_3247	51.16	Intron (uc001llo.1/3632, intron 1 of 12)	10	134351353	134596984	245632	1	3632	uc001llp.3	23809	ENSG00000068383	INPP5A	inositol polyphosphate-5-phosphatase A
chr10	134429519	134431475	1957	*	MACS_peak_3248	56.58	Intron (uc001llo.1/3632, intron 2 of 12)	10	134421419	134596984	175566	1	3632	uc001llq.3	8100	ENSG00000068383	INPP5A	inositol polyphosphate-5-phosphatase A
chr10	134472936	134473926	991	*	MACS_peak_3249	136.88	Intron (uc001llo.1/3632, intron 4 of 12)	10	134421419	134596984	175566	1	3632	uc001llq.3	51517	ENSG00000068383	INPP5A	inositol polyphosphate-5-phosphatase A
chr10	134660634	134661894	1261	*	MACS_peak_3250	114.95	Exon (uc021qbc.1/54777, exon 42 of 58)	10	134598320	134599537	1218	2	84504	uc001llr.2	-61097	ENSG00000148826	NKX6-2	NK6 homeobox 2
chr10	134686056	134687023	968	*	MACS_peak_3251	142.8	Exon (uc021qbc.1/54777, exon 32 of 58)	10	134712021	134730186	18166	2	54777	uc009ybf.2	43163	ENSG00000171811	CFAP46	cilia and flagella associated protein 46
chr10	134721131	134722884	1754	*	MACS_peak_3252	82.58	Exon (uc021qbc.1/54777, exon 21 of 58)	10	134712021	134730186	18166	2	54777	uc009ybf.2	7302	ENSG00000171811	CFAP46	cilia and flagella associated protein 46
chr10	134751942	134753607	1666	*	MACS_peak_3253	156.89	Promoter (2-3kb)	10	134621896	134756089	134194	2	54777	uc021qbc.1	2482	ENSG00000171811	CFAP46	cilia and flagella associated protein 46
chr10	134888560	134890392	1833	*	MACS_peak_3256	65.15	Intron (uc001llw.3/84435, intron 3 of 15)	10	134884433	134945179	60747	1	84435	uc001llw.3	4127	ENSG00000197177	ADGRA1	adhesion G protein-coupled receptor A1
chr10	134945073	134947209	2137	*	MACS_peak_3257	99.59	3' UTR	10	134973971	135039916	65946	1	85442	uc001llz.1	-26762	ENSG00000171798	KNDC1	kinase non-catalytic C-lobe domain containing 1
chr10	134989513	134991875	2363	*	MACS_peak_3258	86.77	Intron (uc001llz.1/85442, intron 3 of 29)	10	134980688	135020708	40021	1	85442	uc001lma.1	8825	ENSG00000171798	KNDC1	kinase non-catalytic C-lobe domain containing 1
chr10	134995506	134998572	3067	*	MACS_peak_3259	120.52	Exon (uc001llz.1/85442, exon 4 of 30)	10	135010562	135016597	6036	1	85442	uc001lmb.1	-11990	ENSG00000171798	KNDC1	kinase non-catalytic C-lobe domain containing 1
chr10	135017363	135018271	909	*	MACS_peak_3260	70.96	Intron (uc001llz.1/85442, intron 17 of 29)	10	135010562	135016597	6036	1	85442	uc001lmb.1	6801	ENSG00000171798	KNDC1	kinase non-catalytic C-lobe domain containing 1
chr10	135135748	135136324	577	*	MACS_peak_3263	52.86	Intron (uc021qbf.1/118471, intron 4 of 7)	10	135092134	135125841	33708	2	10844	uc001lmh.2	-9907	ENSG00000130640	TUBGCP2	tubulin gamma complex associated protein 2
chr10	135145302	135145984	683	*	MACS_peak_3264	69.98	Intron (uc021qbf.1/118471, intron 4 of 7)	10	135138928	135150475	11548	2	50632	uc001lmo.2	4491	ENSG00000130643	CALY	calcyon neuron specific vesicular protein
chr10	135268893	135270186	1294	*	MACS_peak_3266	114.5	Promoter (<=1kb)	10	135269741	135278678	8938	1	619207	uc001lnh.1	0	ENSG00000214279	SCART1	scavenger receptor family member expressed on T-cells 1
chr10	135344860	135345907	1048	*	MACS_peak_3267	163.93	Promoter (<=1kb)	10	135345080	135374724	29645	1	1571	uc001lnl.1	0	ENSG00000130649	CYP2E1	cytochrome P450 family 2 subfamily E member 1
chr11	203464	205012	1549	*	MACS_peak_3271	90.09	Promoter (2-3kb)	11	202924	207422	4499	2	51272	uc001lod.2	2410	ENSG00000177951	BET1L	Bet1 golgi vesicular membrane trafficking protein like
chr11	305557	306454	898	*	MACS_peak_3273	102.15	Promoter (1-2kb)	11	308107	309410	1304	1	10581	uc001lox.4	-1653	ENSG00000185201	IFITM2	interferon induced transmembrane protein 2
chr11	324656	325399	744	*	MACS_peak_3274	207.3	Exon (uc001loz.3/uc001loz.3, exon 2 of 2)	11	319673	320914	1242	2	10410	uc031pxy.1	-3742	ENSG00000142089	IFITM3	interferon induced transmembrane protein 3
chr11	373374	374642	1269	*	MACS_peak_3278	69.86	Exon (uc001lpb.3/338707, exon 7 of 20)	11	369795	382117	12323	1	338707	uc001lpb.3	3579	ENSG00000182272	B4GALNT4	beta-1,4-N-acetyl-galactosaminyltransferase 4
chr11	395532	398058	2527	*	MACS_peak_3279	60.79	Promoter (1-2kb)	11	394217	404908	10692	1	11187	uc001lpc.3	1315	ENSG00000184363	PKP3	plakophilin 3
chr11	427682	429876	2195	*	MACS_peak_3280	50.63	Promoter (<=1kb)	11	417930	429866	11937	2	338440	uc001lph.2	0	ENSG00000185101	ANO9	anoctamin 9
chr11	443332	444853	1522	*	MACS_peak_3281	1340.09	Promoter (1-2kb)	11	417930	442011	24082	2	338440	uc010qvv.1	-1321	ENSG00000185101	ANO9	anoctamin 9
chr11	447616	448895	1280	*	MACS_peak_3282	70.69	Promoter (1-2kb)	11	450280	479445	29166	1	81490	uc009ybv.1	-1385	ENSG00000174915	PTDSS2	phosphatidylserine synthase 2
chr11	469379	470588	1210	*	MACS_peak_3283	182.05	Intron (uc009ybv.1/81490, intron 2 of 3)	11	450280	491387	41108	1	81490	uc001lpj.3	19099	ENSG00000174915	PTDSS2	phosphatidylserine synthase 2
chr11	505980	507850	1871	*	MACS_peak_3284	157.87	Promoter (<=1kb)	11	494512	506821	12310	2	6050	uc001lpl.1	0	ENSG00000023191	RNH1	ribonuclease/angiogenin inhibitor 1
chr11	548379	551235	2857	*	MACS_peak_3286	53.65	Exon (uc010qvz.2/115399, exon 7 of 14)	11	554850	560779	5930	2	256329	uc001lpx.3	9544	ENSG00000185522	LMNTD2	lamin tail domain containing 2
chr11	574142	574869	728	*	MACS_peak_3287	249.35	Promoter (1-2kb)	11	573808	575885	2078	2	143666	uc010qwb.3	1016	NA	LOC143666	uncharacterized LOC143666
chr11	686569	687574	1006	*	MACS_peak_3288	54.99	Promoter (<=1kb)	11	644225	688057	43833	2	10522	uc009ycf.1	483	ENSG00000177030	DEAF1	DEAF1, transcription factor
chr11	693164	696281	3118	*	MACS_peak_3289	249.21	Promoter (<=1kb)	11	644225	695740	51516	2	10522	uc001lqq.1	0	ENSG00000177030	DEAF1	DEAF1, transcription factor
chr11	721179	722765	1587	*	MACS_peak_3290	50.33	Promoter (<=1kb)	11	721926	727727	5802	1	64787	uc001lqx.3	0	ENSG00000177106	EPS8L2	EPS8 like 2
chr11	776117	780824	4708	*	MACS_peak_3291	247.47	Promoter (<=1kb)	11	779454	780755	1302	1	171391	uc031pyb.1	0	ENSG00000255284	LOC171391	uncharacterized LOC171391
chr11	838404	839047	644	*	MACS_peak_3292	52.18	3' UTR	11	839721	842529	2809	2	5441	uc001lsc.3	3482	ENSG00000177700	POLR2L	RNA polymerase II subunit L
chr11	843604	845609	2006	*	MACS_peak_3293	187.32	Promoter (<=1kb)	11	844081	867116	23036	1	7106	uc001lsi.1	0	ENSG00000214063	TSPAN4	tetraspanin 4
chr11	883221	885061	1841	*	MACS_peak_3294	97.81	Exon (uc010qwu.1/66005, exon 9 of 14)	11	867859	910821	42963	2	66005	uc010qwv.2	25760	ENSG00000177830	CHID1	chitinase domain containing 1
chr11	975586	978370	2785	*	MACS_peak_3296	92.29	Exon (uc009yco.2/161, exon 5 of 16)	11	972062	982781	10720	1	161	uc001lsu.1	3524	ENSG00000183020	AP2A2	adaptor related protein complex 2 alpha 2 subunit
chr11	1014647	1018842	4196	*	MACS_peak_3297	139.27	Exon (uc001lsw.2/4588, exon 31 of 33)	11	1012824	1036706	23883	2	4588	uc001lsw.2	17864	ENSG00000184956	MUC6	mucin 6, oligomeric mucus/gel-forming
chr11	1024793	1027832	3040	*	MACS_peak_3298	111.1	Exon (uc001lsw.2/4588, exon 16 of 33)	11	1012824	1036706	23883	2	4588	uc001lsw.2	8874	ENSG00000184956	MUC6	mucin 6, oligomeric mucus/gel-forming
chr11	1086561	1087846	1286	*	MACS_peak_3300	94.55	Exon (uc001lsx.1/4583, exon 24 of 51)	11	1074875	1104417	29543	1	4583	uc001lsx.1	11686	NA	MUC2	mucin 2, oligomeric mucus/gel-forming
chr11	1087908	1090290	2383	*	MACS_peak_3301	227.44	Exon (uc001lsx.1/4583, exon 25 of 51)	11	1074875	1104417	29543	1	4583	uc001lsx.1	13033	NA	MUC2	mucin 2, oligomeric mucus/gel-forming
chr11	1291926	1293017	1092	*	MACS_peak_3303	113.19	Downstream (2-3kb)	11	1295598	1323973	28376	2	54472	uc001ltd.3	30956	ENSG00000078902	TOLLIP	toll interacting protein
chr11	1329067	1331458	2392	*	MACS_peak_3304	95.89	Promoter (<=1kb)	11	1330938	1331937	1000	1	255512	uc001ltg.4	0	ENSG00000255153	TOLLIP-AS1	TOLLIP antisense RNA 1 (head to head)
chr11	1434610	1435628	1019	*	MACS_peak_3307	93.12	Promoter (2-3kb)	11	1432382	1483919	51538	1	9024	uc001ltm.4	2228	ENSG00000174672	BRSK2	BR serine/threonine kinase 2
chr11	1468590	1471031	2442	*	MACS_peak_3308	77.59	Promoter (<=1kb)	11	1471817	1483919	12103	1	9024	uc009ycw.4	-786	ENSG00000174672	BRSK2	BR serine/threonine kinase 2
chr11	1520140	1522315	2176	*	MACS_peak_3309	63.07	Intron (uc001ltq.2/81532, intron 1 of 4)	11	1490685	1507948	17264	2	81532	uc010qwz.2	-12192	ENSG00000182208	MOB2	MOB kinase activator 2
chr11	1562002	1563548	1547	*	MACS_peak_3310	217.33	Intron (uc001ltq.2/81532, intron 1 of 4)	11	1575281	1593150	17870	2	1850	uc001lts.2	29602	ENSG00000184545	DUSP8	dual specificity phosphatase 8
chr11	1569252	1571169	1918	*	MACS_peak_3311	73.74	Intron (uc001ltq.2/81532, intron 1 of 4)	11	1575281	1593150	17870	2	1850	uc001lts.2	21981	ENSG00000184545	DUSP8	dual specificity phosphatase 8
chr11	1580267	1581663	1397	*	MACS_peak_3312	140.9	Exon (uc001lts.2/1850, exon 4 of 7)	11	1575281	1593150	17870	2	1850	uc001lts.2	11487	ENSG00000184545	DUSP8	dual specificity phosphatase 8
chr11	1591467	1592390	924	*	MACS_peak_3313	104.01	Promoter (<=1kb)	11	1575281	1593150	17870	2	1850	uc001lts.2	760	ENSG00000184545	DUSP8	dual specificity phosphatase 8
chr11	1665191	1666127	937	*	MACS_peak_3314	56.97	Intron (uc001ltq.2/81532, intron 1 of 4)	11	1651033	1652159	1127	1	439915	uc001lty.3	14158	ENSG00000185940	KRTAP5-5	keratin associated protein 5-5
chr11	1690736	1692427	1692	*	MACS_peak_3315	153.06	Intron (uc001ltq.2/81532, intron 1 of 4)	11	1686829	1689086	2258	1	387742	uc009ycz.3	3907	ENSG00000205866	FAM99A	family with sequence similarity 99 member A (non-protein coding)
chr11	1764417	1768634	4218	*	MACS_peak_3316	197.28	Intron (uc001ltq.2/81532, intron 1 of 4)	11	1753640	1771824	18185	2	402778	uc021qbs.2	3190	ENSG00000244242	IFITM10	interferon induced transmembrane protein 10
chr11	1783855	1786166	2312	*	MACS_peak_3317	199.5	Promoter (<=1kb)	11	1773982	1785222	11241	2	1509	uc001luc.2	0	ENSG00000117984	CTSD	cathepsin D
chr11	1848028	1849700	1673	*	MACS_peak_3318	78.96	Promoter (<=1kb)	11	1848709	1857514	8806	1	90019	uc010qxb.1	0	ENSG00000149043	SYT8	synaptotagmin 8
chr11	1855247	1858927	3681	*	MACS_peak_3319	70.2	Promoter (<=1kb)	11	1855674	1858750	3077	1	90019	uc001lue.1	0	ENSG00000149043	SYT8	synaptotagmin 8
chr11	1974003	1976342	2340	*	MACS_peak_3320	64.03	Exon (uc001lux.3/6150, exon 4 of 5)	11	1968502	1977839	9338	1	6150	uc001lux.3	5501	ENSG00000214026	MRPL23	mitochondrial ribosomal protein L23
chr11	2153947	2156846	2900	*	MACS_peak_3322	161.51	Promoter (<=1kb)	11	2155364	2155439	76	2	619552	uc021qcc.1	0	ENSG00000207805	MIR483	microRNA 483
chr11	2322309	2324598	2290	*	MACS_peak_3324	69.84	Promoter (<=1kb)	11	2323243	2336264	13022	1	10077	uc001lvx.1	0	ENSG00000064201	TSPAN32	tetraspanin 32
chr11	2349996	2351464	1469	*	MACS_peak_3325	100.37	Exon (uc001lwe.3/uc001lwe.3, exon 3 of 3)	11	2336266	2339430	3165	1	10077	uc001lwd.1	13730	ENSG00000064201	TSPAN32	tetraspanin 32
chr11	2366508	2367848	1341	*	MACS_peak_3326	72.18	Intron (uc001lwe.3/uc001lwe.3, intron 1 of 2)	11	2336266	2339430	3165	1	10077	uc001lwd.1	30242	ENSG00000064201	TSPAN32	tetraspanin 32
chr11	2379688	2381594	1907	*	MACS_peak_3327	143.44	Intron (uc001lwe.3/uc001lwe.3, intron 1 of 2)	11	2398547	2418649	20103	1	975	uc001lwf.1	-16953	ENSG00000110651	CD81	CD81 molecule
chr11	2401508	2404202	2695	*	MACS_peak_3328	172.3	Promoter (2-3kb)	11	2398547	2418649	20103	1	975	uc001lwf.1	2961	ENSG00000110651	CD81	CD81 molecule
chr11	2553105	2556029	2925	*	MACS_peak_3329	84.4	Intron (uc001lwn.3/3784, intron 2 of 15)	11	2482666	2870340	387675	1	3784	uc001lwo.4	70439	ENSG00000053918	KCNQ1	potassium voltage-gated channel subfamily Q member 1
chr11	2605479	2606420	942	*	MACS_peak_3330	280.78	Intron (uc001lwn.3/3784, intron 7 of 15)	11	2629558	2721228	91671	2	10984	uc001lwp.3	114808	ENSG00000269821	KCNQ1OT1	KCNQ1 opposite strand/antisense transcript 1 (non-protein coding)
chr11	2620749	2621544	796	*	MACS_peak_3331	168.56	Intron (uc001lwn.3/3784, intron 10 of 15)	11	2629558	2721228	91671	2	10984	uc001lwp.3	99684	ENSG00000269821	KCNQ1OT1	KCNQ1 opposite strand/antisense transcript 1 (non-protein coding)
chr11	2748647	2750760	2114	*	MACS_peak_3332	62.3	Intron (uc001lwn.3/3784, intron 11 of 15)	11	2629558	2721228	91671	2	10984	uc001lwp.3	-27419	ENSG00000269821	KCNQ1OT1	KCNQ1 opposite strand/antisense transcript 1 (non-protein coding)
chr11	2753407	2754529	1123	*	MACS_peak_3333	106.89	Intron (uc001lwn.3/3784, intron 11 of 15)	11	2629558	2721228	91671	2	10984	uc001lwp.3	-32179	ENSG00000269821	KCNQ1OT1	KCNQ1 opposite strand/antisense transcript 1 (non-protein coding)
chr11	2769401	2770474	1074	*	MACS_peak_3334	301.78	Intron (uc001lwn.3/3784, intron 11 of 15)	11	2629558	2721228	91671	2	10984	uc001lwp.3	-48173	ENSG00000269821	KCNQ1OT1	KCNQ1 opposite strand/antisense transcript 1 (non-protein coding)
chr11	2773799	2774902	1104	*	MACS_peak_3335	55.22	Intron (uc001lwn.3/3784, intron 11 of 15)	11	2629558	2721228	91671	2	10984	uc001lwp.3	-52571	ENSG00000269821	KCNQ1OT1	KCNQ1 opposite strand/antisense transcript 1 (non-protein coding)
chr11	2810220	2812308	2089	*	MACS_peak_3336	155.13	Intron (uc001lwn.3/3784, intron 15 of 15)	11	2891263	2893336	2074	1	55539	uc009ydq.3	-78955	ENSG00000237941	KCNQ1DN	KCNQ1 downstream neighbor (non-protein coding)
chr11	2919635	2920635	1001	*	MACS_peak_3337	175.43	Promoter (<=1kb)	11	2920951	2946476	25526	1	5002	uc001lwx.3	-316	ENSG00000110628	SLC22A18	solute carrier family 22 member 18
chr11	3029690	3030580	891	*	MACS_peak_3338	118.04	Promoter (<=1kb)	11	3022152	3028964	6813	2	833	uc009ydu.3	-726	ENSG00000110619	CARS	cysteinyl-tRNA synthetase
chr11	3043231	3044916	1686	*	MACS_peak_3339	698.64	Intron (uc001lxe.3/833, intron 10 of 22)	11	3022152	3028964	6813	2	833	uc009ydu.3	-14267	ENSG00000110619	CARS	cysteinyl-tRNA synthetase
chr11	3057393	3058136	744	*	MACS_peak_3340	98.31	Intron (uc001lxi.1/uc001lxi.1, intron 1 of 1)	11	3022152	3078681	56530	2	833	uc001lxe.3	20545	ENSG00000110619	CARS	cysteinyl-tRNA synthetase
chr11	3070599	3072514	1916	*	MACS_peak_3341	50.09	Intron (uc001lxe.3/833, intron 1 of 22)	11	3022152	3078681	56530	2	833	uc001lxe.3	6167	ENSG00000110619	CARS	cysteinyl-tRNA synthetase
chr11	3072692	3073621	930	*	MACS_peak_3342	160.39	Intron (uc001lxe.3/833, intron 1 of 22)	11	3022152	3078681	56530	2	833	uc001lxe.3	5060	ENSG00000110619	CARS	cysteinyl-tRNA synthetase
chr11	3073804	3074431	628	*	MACS_peak_3343	53.29	Intron (uc001lxe.3/833, intron 1 of 22)	11	3022152	3078681	56530	2	833	uc001lxe.3	4250	ENSG00000110619	CARS	cysteinyl-tRNA synthetase
chr11	3116710	3117854	1145	*	MACS_peak_3344	246.27	Promoter (<=1kb)	11	3108346	3116109	7764	2	114879	uc001lxj.2	-601	ENSG00000021762	OSBPL5	oxysterol binding protein like 5
chr11	3177108	3179267	2160	*	MACS_peak_3345	269.72	Intron (uc001lxk.2/114879, intron 1 of 21)	11	3108346	3186582	78237	2	114879	uc001lxk.2	7315	ENSG00000021762	OSBPL5	oxysterol binding protein like 5
chr11	3236166	3237673	1508	*	MACS_peak_3347	53.27	Promoter (1-2kb)	11	3239562	3244361	4800	1	283303	uc001lxn.2	-1889	ENSG00000236301	MRGPRG-AS1	MRGPRG antisense RNA 1
chr11	3395043	3395935	893	*	MACS_peak_3348	59.46	Intron (uc001lxs.3/7748, intron 1 of 3)	11	3379157	3400452	21296	2	7748	uc001lxs.3	4517	ENSG00000005801	ZNF195	zinc finger protein 195
chr11	3667320	3668123	804	*	MACS_peak_3349	101.66	Promoter (<=1kb)	11	3666361	3685646	19286	1	417	uc001lye.1	959	ENSG00000129744	ART1	ADP-ribosyltransferase 1
chr11	3818505	3819710	1206	*	MACS_peak_3350	53.68	Promoter (<=1kb)	11	3818954	3847601	28648	1	27315	uc001lyl.4	0	ENSG00000148985	PGAP2	post-GPI attachment to proteins 2
chr11	5067682	5068693	1012	*	MACS_peak_3354	77.84	Promoter (<=1kb)	11	5067756	5068691	936	1	119679	uc010qyv.2	0	ENSG00000205495	OR52J3	olfactory receptor family 52 subfamily J member 3
chr11	5279540	5280468	929	*	MACS_peak_3355	702.42	Intron (uc001mak.1/3048, intron 5 of 6)	11	5274421	5276395	1975	2	3048	uc001maj.1	-3145	ENSG00000196565	HBG2	hemoglobin subunit gamma 2
chr11	5665992	5666565	574	*	MACS_peak_3356	53.22	Promoter (<=1kb)	11	5275522	5667011	391490	2	3048	uc001mak.1	446	ENSG00000196565	HBG2	hemoglobin subunit gamma 2
chr11	5893523	5893950	428	*	MACS_peak_3357	104.75	Intron (uc001mbq.1/85363, intron 2 of 4)	11	5905523	5906461	939	1	390081	uc010qzs.2	-11573	ENSG00000180974	OR52E4	olfactory receptor family 52 subfamily E member 4
chr11	5943722	5944649	928	*	MACS_peak_3358	143.73	Intron (uc001mbq.1/85363, intron 2 of 4)	11	5699434	5959849	260416	2	85363	uc001mbq.1	15200	ENSG00000132256	TRIM5	tripartite motif containing 5
chr11	6342340	6343200	861	*	MACS_peak_3361	60.01	Promoter (<=1kb)	11	6340176	6341740	1565	2	112464	uc001mcu.1	-600	ENSG00000170955	CAVIN3	caveolae associated protein 3
chr11	6410971	6412791	1821	*	MACS_peak_3363	145.89	Promoter (<=1kb)	11	6411644	6416008	4365	1	6609	uc001mcv.2	0	ENSG00000166311	SMPD1	sphingomyelin phosphodiesterase 1
chr11	6458954	6459823	870	*	MACS_peak_3364	296.31	Promoter (2-3kb)	11	6452268	6462254	9987	2	3263	uc001mdg.2	2431	ENSG00000110169	HPX	hemopexin
chr11	6476106	6477202	1097	*	MACS_peak_3366	161.42	Intron (uc001mdh.3/10612, intron 8 of 12)	11	6460839	6462254	1416	2	3263	uc010rai.1	-13852	ENSG00000110169	HPX	hemopexin
chr11	6494387	6495148	762	*	MACS_peak_3367	103.45	Promoter (<=1kb)	11	6470536	6494986	24451	2	10612	uc010rak.1	0	ENSG00000110171	TRIM3	tripartite motif containing 3
chr11	6639110	6641028	1919	*	MACS_peak_3370	122.13	Promoter (<=1kb)	11	6633997	6640585	6589	2	1200	uc001mek.1	0	ENSG00000166340	TPP1	tripeptidyl peptidase 1
chr11	6740531	6741390	860	*	MACS_peak_3371	105.39	Promoter (1-2kb)	11	6734381	6743110	8730	2	387751	uc001meo.4	1720	ENSG00000254838	GVINP1	GTPase, very large interferon inducible pseudogene 1
chr11	7295444	7296249	806	*	MACS_peak_3375	76.39	Intron (uc001mfd.3/143425, intron 1 of 8)	11	7273181	7490276	217096	1	143425	uc009yfi.3	22263	ENSG00000170743	SYT9	synaptotagmin 9
chr11	7442336	7442941	606	*	MACS_peak_3376	57.67	Intron (uc001mfd.3/143425, intron 7 of 8)	11	7506600	7532606	26007	1	283298	uc001mfi.3	-63659	ENSG00000183801	OLFML1	olfactomedin like 1
chr11	7532282	7533313	1032	*	MACS_peak_3377	526.58	Promoter (1-2kb)	11	7534996	7674996	140001	1	8495	uc001mfj.5	-1683	ENSG00000166387	PPFIBP2	PPFIA binding protein 2
[truncated: 12,249 more rows]

## Sheet: boundECM
HA-MITF-501Mel peaks associated differentially expressed ECM genes
seqnames	start	end	width	strand	V4	V5	annotation	geneChr	geneStart	geneEnd	geneLength	geneStrand	geneId	transcriptId	distanceToTSS	ENSEMBL	SYMBOL	GENENAME
chr1	22195882	22197643	1762	*	MACS_peak_424	70.47	Intron (uc001bfj.3/3339, intron 33 of 96)	1	22213708	22222803	9096	2	3339	uc009vqe.1	25160	ENSG00000142798	HSPG2	heparan sulfate proteoglycan 2
chr1	22197850	22201462	3613	*	MACS_peak_425	69.92	Exon (uc001bfj.3/3339, exon 26 of 97)	1	22213708	22222803	9096	2	3339	uc009vqe.1	21341	ENSG00000142798	HSPG2	heparan sulfate proteoglycan 2
chr1	26344930	26345818	889	*	MACS_peak_496	114.27	Promoter (2-3kb)	1	26348271	26362954	14684	1	2134	uc001blf.3	-2453	ENSG00000158008	EXTL1	exostosin like glycosyltransferase 1
chr1	26354552	26356144	1593	*	MACS_peak_497	66.77	Exon (uc001blf.3/2134, exon 2 of 11)	1	26348271	26362954	14684	1	2134	uc001blf.3	6281	ENSG00000158008	EXTL1	exostosin like glycosyltransferase 1
chr1	31344427	31345703	1277	*	MACS_peak_584	160.42	3' UTR	1	31342313	31351587	9275	2	9672	uc001bsd.2	5884	ENSG00000162512	SDC3	syndecan 3
chr1	32164703	32167858	3156	*	MACS_peak_594	155.69	Promoter (<=1kb)	1	32117848	32164207	46360	2	1307	uc001btj.1	-496	ENSG00000084636	COL16A1	collagen type XVI alpha 1 chain
chr1	39633387	39634034	648	*	MACS_peak_710	80.32	Intron (uc001cdc.2/23499, intron 1 of 61)	1	39670423	39748740	78318	1	23499	uc010oit.1	-36389	ENSG00000127603	MACF1	microtubule-actin crosslinking factor 1
chr1	39649375	39650377	1003	*	MACS_peak_711	56.58	Intron (uc001cdc.2/23499, intron 1 of 61)	1	39670423	39748740	78318	1	23499	uc010oit.1	-20046	ENSG00000127603	MACF1	microtubule-actin crosslinking factor 1
chr1	39696266	39697110	845	*	MACS_peak_712	133.78	5' UTR	1	39670423	39748740	78318	1	23499	uc010oit.1	25843	ENSG00000127603	MACF1	microtubule-actin crosslinking factor 1
chr1	103432203	103433022	820	*	MACS_peak_1292	67.59	Intron (uc001duk.3/1301, intron 34 of 63)	1	103342023	103496800	154778	2	1301	uc001duk.3	63778	ENSG00000060718	COL11A1	collagen type XI alpha 1 chain
chr1	112219991	112220741	751	*	MACS_peak_1396	167.8	Intron (uc001ebi.3/5906, intron 1 of 7)	1	112162405	112256101	93697	1	5906	uc001ebl.3	57586	ENSG00000116473	RAP1A	RAP1A, member of RAS oncogene family
chr1	117908612	117911048	2437	*	MACS_peak_1479	117.1	Promoter (<=1kb)	1	117910085	118042176	132092	1	10905	uc009whg.1	0	ENSG00000198162	MAN1A2	mannosidase alpha class 1A member 2
chr1	117918666	117919466	801	*	MACS_peak_1480	68.86	Intron (uc009whg.1/10905, intron 1 of 8)	1	117910085	118068320	158236	1	10905	uc001ehd.1	8581	ENSG00000198162	MAN1A2	mannosidase alpha class 1A member 2
chr1	162679430	162680388	959	*	MACS_peak_1688	188.09	Intron (uc001gcf.3/4921, intron 3 of 18)	1	162602228	162750247	148020	1	4921	uc001gcg.3	77202	ENSG00000162733	DDR2	discoidin domain receptor tyrosine kinase 2
chr1	182992307	182993739	1433	*	MACS_peak_1819	54.62	Promoter (<=1kb)	1	182992595	183074191	81597	1	3915	uc001gpx.3	0	ENSG00000135862	LAMC1	laminin subunit gamma 1
chr1	193182973	193183646	674	*	MACS_peak_1875	167.71	Intron (uc001gtb.3/79577, intron 13 of 16)	1	193147860	193155743	7884	2	8707	uc001gtc.4	-27230	ENSG00000162630	B3GALT2	beta-1,3-galactosyltransferase 2
chr1	230296717	230297522	806	*	MACS_peak_2066	84.51	Intron (uc010pvy.1/2590, intron 1 of 15)	1	230202956	230417875	214920	1	2590	uc010pwa.1	93761	ENSG00000143641	GALNT2	polypeptide N-acetylgalactosaminyltransferase 2
chr1	230299774	230300380	607	*	MACS_peak_2067	93.45	Intron (uc010pvy.1/2590, intron 1 of 15)	1	230202956	230417875	214920	1	2590	uc010pwa.1	96818	ENSG00000143641	GALNT2	polypeptide N-acetylgalactosaminyltransferase 2
chr1	230326535	230327227	693	*	MACS_peak_2068	268	Intron (uc010pvy.1/2590, intron 2 of 15)	1	230397616	230417875	20260	1	2590	uc001htu.2	-70389	ENSG00000143641	GALNT2	polypeptide N-acetylgalactosaminyltransferase 2
chr10	7670124	7671071	948	*	MACS_peak_2248	62.56	Intron (uc021pmv.1/80760, intron 5 of 14)	10	7601232	7661636	60405	2	80760	uc021pmu.1	-8488	ENSG00000123243	ITIH5	inter-alpha-trypsin inhibitor heavy chain family member 5
chr10	7696963	7697595	633	*	MACS_peak_2249	192.2	Exon (uc021pmv.1/80760, exon 2 of 15)	10	7601232	7708961	107730	2	80760	uc021pmv.1	11366	ENSG00000123243	ITIH5	inter-alpha-trypsin inhibitor heavy chain family member 5
chr10	7698982	7700040	1059	*	MACS_peak_2250	71.54	Intron (uc021pmv.1/80760, intron 1 of 14)	10	7601232	7708961	107730	2	80760	uc021pmv.1	8921	ENSG00000123243	ITIH5	inter-alpha-trypsin inhibitor heavy chain family member 5
chr10	74822439	74823037	599	*	MACS_peak_2646	79.85	Intron (uc021ptj.1/5033, intron 4 of 13)	10	74766980	74834673	67694	2	5033	uc021ptj.1	11636	ENSG00000122884	P4HA1	prolyl 4-hydroxylase subunit alpha 1
chr10	124227739	124228755	1017	*	MACS_peak_3096	71.15	Intron (uc001lgj.2/5654, intron 1 of 8)	10	124221041	124274424	53384	1	5654	uc001lgj.2	6698	ENSG00000166033	HTRA1	HtrA serine peptidase 1
chr10	124241356	124242208	853	*	MACS_peak_3097	72.87	Intron (uc001lgj.2/5654, intron 1 of 8)	10	124221041	124274424	53384	1	5654	uc001lgj.2	20315	ENSG00000166033	HTRA1	HtrA serine peptidase 1
chr11	35187873	35188994	1122	*	MACS_peak_3575	400.42	Intron (uc021qfw.1/960, intron 1 of 8)	11	35211382	35236461	25080	1	960	uc010res.2	-22388	ENSG00000026508	CD44	CD44 molecule (Indian blood group)
chr11	35319951	35320592	642	*	MACS_peak_3576	90.02	Intron (uc001mwd.3/6506, intron 6 of 10)	11	35211382	35236461	25080	1	960	uc010reu.2	108569	ENSG00000026508	CD44	CD44 molecule (Indian blood group)
chr11	44096977	44097840	864	*	MACS_peak_3624	53.45	Promoter (<=1kb)	11	44097076	44266980	169905	1	2132	uc010rfo.2	0	ENSG00000151348	EXT2	exostosin glycosyltransferase 2
chr11	44223916	44224649	734	*	MACS_peak_3625	94.29	Intron (uc010rfo.2/2132, intron 9 of 13)	11	44117747	44266980	149234	1	2132	uc001mya.3	106169	ENSG00000151348	EXT2	exostosin glycosyltransferase 2
chr12	65152695	65153735	1041	*	MACS_peak_4693	771.47	Promoter (<=1kb)	12	65107222	65153226	46005	2	2799	uc001ssg.4	0	ENSG00000135677	GNS	glucosamine (N-acetyl)-6-sulfatase
chr12	76423704	76426409	2706	*	MACS_peak_4748	56.19	Promoter (<=1kb)	12	76419227	76425556	6330	2	22822	uc001sxu.3	0	ENSG00000139289	PHLDA1	pleckstrin homology like domain family A member 1
chr12	120658129	120659725	1597	*	MACS_peak_5132	128	Exon (uc031qjr.1/5829, exon 6 of 12)	12	120648242	120654919	6678	2	5829	uc001txu.3	-3210	ENSG00000089159	PXN	paxillin
chr12	120699547	120701546	2000	*	MACS_peak_5133	56.31	Promoter (2-3kb)	12	120648242	120703574	55333	2	5829	uc001txt.3	2028	ENSG00000089159	PXN	paxillin
chr13	29027444	29028232	789	*	MACS_peak_5460	77.65	Intron (uc001usb.3/2321, intron 3 of 29)	13	28874483	29069265	194783	2	2321	uc001usb.3	41033	ENSG00000102755	FLT1	fms related tyrosine kinase 1
chr13	94316696	94317301	606	*	MACS_peak_5750	51.04	Intron (uc010tig.1/10082, intron 2 of 5)	13	94197516	94484342	286827	1	10082	uc001vlu.1	119180	ENSG00000183098	GPC6	glypican 6
chr13	94330594	94331179	586	*	MACS_peak_5751	52.38	Intron (uc010tig.1/10082, intron 2 of 5)	13	94197516	94484342	286827	1	10082	uc001vlu.1	133078	ENSG00000183098	GPC6	glypican 6
chr13	110997548	110998622	1075	*	MACS_peak_5876	219.09	Intron (uc001vqx.3/1284, intron 3 of 47)	13	110959631	111165373	205743	1	1284	uc001vqx.3	37917	ENSG00000134871	COL4A2	collagen type IV alpha 2 chain
chr13	111043702	111044456	755	*	MACS_peak_5877	192.91	Intron (uc001vqx.3/1284, intron 4 of 47)	13	110959631	111165373	205743	1	1284	uc001vqx.3	84071	ENSG00000134871	COL4A2	collagen type IV alpha 2 chain
chr13	111046319	111047230	912	*	MACS_peak_5878	145.37	Intron (uc001vqx.3/1284, intron 4 of 47)	13	110959631	111165373	205743	1	1284	uc001vqx.3	86688	ENSG00000134871	COL4A2	collagen type IV alpha 2 chain
chr13	111049116	111050486	1371	*	MACS_peak_5879	190.53	Intron (uc001vqx.3/1284, intron 4 of 47)	13	110959631	111165373	205743	1	1284	uc001vqx.3	89485	ENSG00000134871	COL4A2	collagen type IV alpha 2 chain
chr14	53362482	53363285	804	*	MACS_peak_6171	68.66	Intron (uc001xad.3/10979, intron 3 of 14)	14	53323989	53417591	93603	2	10979	uc001xad.3	54306	ENSG00000073712	FERMT2	fermitin family member 2
chr14	65878198	65880191	1994	*	MACS_peak_6293	50.63	Promoter (<=1kb)	14	65879448	66210839	331392	1	2530	uc001xip.3	0	ENSG00000033170	FUT8	fucosyltransferase 8
chr14	77769195	77770567	1373	*	MACS_peak_6435	69.98	Promoter (1-2kb)	14	77741299	77767506	26208	2	29954	uc001xth.1	-1689	ENSG00000009830	POMT2	protein O-mannosyltransferase 2
chr14	77784123	77785286	1164	*	MACS_peak_6436	81.81	Promoter (1-2kb)	14	77741299	77787225	45927	2	29954	uc001xti.2	1939	ENSG00000009830	POMT2	protein O-mannosyltransferase 2
chr15	49163371	49163987	617	*	MACS_peak_6934	74.69	Intron (uc010uey.1/399694, intron 2 of 8)	15	49115934	49169686	53753	2	399694	uc010uey.1	5699	ENSG00000185634	SHC4	SHC adaptor protein 4
chr15	75986591	75988272	1682	*	MACS_peak_7166	54.72	Intron (uc002baw.3/1464, intron 1 of 9)	15	75966663	76005189	38527	2	1464	uc002baw.3	16917	ENSG00000173546	CSPG4	chondroitin sulfate proteoglycan 4
chr15	91449705	91451693	1989	*	MACS_peak_7302	347.23	Promoter (<=1kb)	15	91449970	91465815	15846	1	4122	uc010uql.2	0	ENSG00000196547	MAN2A2	mannosidase alpha class 2A member 2
chr15	99256876	99259247	2372	*	MACS_peak_7351	67.32	Intron (uc010urq.2/3480, intron 2 of 10)	15	99192761	99507759	314999	1	3480	uc010bon.3	64115	ENSG00000140443	IGF1R	insulin like growth factor 1 receptor
chr15	99408278	99409696	1419	*	MACS_peak_7354	357.31	Intron (uc010urq.2/3480, intron 2 of 10)	15	99454544	99460184	5641	1	3480	uc010urr.1	-44848	ENSG00000140443	IGF1R	insulin like growth factor 1 receptor
chr15	99416593	99417717	1125	*	MACS_peak_7355	78.47	Intron (uc010urq.2/3480, intron 2 of 10)	15	99454544	99460184	5641	1	3480	uc010urr.1	-36827	ENSG00000140443	IGF1R	insulin like growth factor 1 receptor
chr15	99418537	99419353	817	*	MACS_peak_7356	186.16	Intron (uc010urq.2/3480, intron 2 of 10)	15	99454544	99460184	5641	1	3480	uc010urr.1	-35191	ENSG00000140443	IGF1R	insulin like growth factor 1 receptor
chr15	99439387	99440787	1401	*	MACS_peak_7357	169.94	Exon (uc010urq.2/3480, exon 4 of 11)	15	99454544	99460184	5641	1	3480	uc010urr.1	-13757	ENSG00000140443	IGF1R	insulin like growth factor 1 receptor
chr15	99497019	99498314	1296	*	MACS_peak_7358	112.45	Intron (uc002bul.3/3480, intron 20 of 20)	15	99467754	99478655	10902	1	3480	uc010boo.1	29265	ENSG00000140443	IGF1R	insulin like growth factor 1 receptor
chr15	101760542	101761450	909	*	MACS_peak_7390	69.42	Intron (uc021sxt.1/22856, intron 2 of 2)	15	101715928	101792137	76210	2	22856	uc021sxt.1	30687	ENSG00000131873	CHSY1	chondroitin sulfate synthase 1
chr15	101782284	101783088	805	*	MACS_peak_7391	86.69	Intron (uc021sxt.1/22856, intron 1 of 2)	15	101715928	101792137	76210	2	22856	uc021sxt.1	9049	ENSG00000131873	CHSY1	chondroitin sulfate synthase 1
chr16	69114876	69115556	681	*	MACS_peak_8193	91.12	Intron (uc002ewi.4/79613, intron 17 of 17)	16	69139467	69151570	12104	1	3038	uc010cfh.3	-23911	ENSG00000103044	HAS3	hyaluronan synthase 3
chr16	69142518	69144082	1565	*	MACS_peak_8195	125.61	Promoter (1-2kb)	16	69141443	69151570	10128	1	3038	uc002ewl.3	1075	ENSG00000103044	HAS3	hyaluronan synthase 3
chr16	70414390	70415946	1557	*	MACS_peak_8210	179.62	3' UTR	16	70413338	70434541	21204	2	6483	uc002eyw.2	18595	ENSG00000157350	ST3GAL2	ST3 beta-galactoside alpha-2,3-sialyltransferase 2
chr17	26988922	26990034	1113	*	MACS_peak_8696	51.54	Promoter (<=1kb)	17	26975374	26989190	13817	2	6388	uc002hbw.3	0	ENSG00000132581	SDF2	stromal cell derived factor 2
chr17	45358376	45359274	899	*	MACS_peak_8900	188	Intron (uc002ili.1/3690, intron 2 of 8)	17	45331208	45421658	90451	1	3690	uc010wkr.1	27168	ENSG00000259207	ITGB3	integrin subunit beta 3
chr17	64380881	64381628	748	*	MACS_peak_9117	102.2	Intron (uc002jfo.1/5578, intron 2 of 14)	17	64298926	64806862	507937	1	5578	uc002jfp.1	81955	ENSG00000154229	PRKCA	protein kinase C alpha
chr17	64503086	64503995	910	*	MACS_peak_9118	193.57	Intron (uc002jfo.1/5578, intron 3 of 14)	17	64298926	64806862	507937	1	5578	uc002jfp.1	204160	ENSG00000154229	PRKCA	protein kinase C alpha
chr17	64511299	64511960	662	*	MACS_peak_9119	53.1	Intron (uc002jfo.1/5578, intron 3 of 14)	17	64298926	64806862	507937	1	5578	uc002jfp.1	212373	ENSG00000154229	PRKCA	protein kinase C alpha
chr17	64527971	64529293	1323	*	MACS_peak_9120	96.01	Intron (uc002jfo.1/5578, intron 3 of 14)	17	64298926	64806862	507937	1	5578	uc002jfp.1	229045	ENSG00000154229	PRKCA	protein kinase C alpha
chr18	44287670	44288594	925	*	MACS_peak_9719	65.5	Intron (uc002lci.1/29906, intron 3 of 8)	18	44259081	44311726	52646	2	29906	uc002lci.1	23132	ENSG00000101638	ST8SIA5	ST8 alpha-N-acetyl-neuraminide alpha-2,8-sialyltransferase 5
chr19	10380774	10382164	1391	*	MACS_peak_10136	51.17	Promoter (<=1kb)	19	10381517	10397291	15775	1	3383	uc002mnq.2	0	ENSG00000090339	ICAM1	intercellular adhesion molecule 1
chr19	35557413	35558351	939	*	MACS_peak_10456	169.17	3' UTR	19	35540220	35557475	17256	1	3249	uc002nxt.1	17193	ENSG00000105707	HPN	hepsin
chr20	30191594	30194239	2646	*	MACS_peak_12982	184.44	Promoter (<=1kb)	20	30193086	30194317	1232	1	3397	uc002wwg.2	0	ENSG00000125968	ID1	inhibitor of DNA binding 1, HLH protein
chr20	35170071	35172843	2773	*	MACS_peak_13077	87.99	Promoter (<=1kb)	20	35169887	35178226	8340	1	10398	uc002xfm.2	184	ENSG00000101335	MYL9	myosin light chain 9
chr20	43968512	43971663	3152	*	MACS_peak_13251	291.98	Intron (uc002xnu.3/6385, intron 1 of 4)	20	43953929	43977064	23136	2	6385	uc002xnu.3	5401	ENSG00000124145	SDC4	syndecan 4
chr20	47233847	47238890	5044	*	MACS_peak_13364	91.62	Downstream (1-2kb)	20	47240793	47273118	32326	2	57580	uc002xtv.1	34228	ENSG00000124126	PREX1	phosphatidylinositol-3,4,5-trisphosphate dependent Rac exchange factor 1
chr20	47241731	47243645	1915	*	MACS_peak_13365	73.53	3' UTR	20	47240793	47273118	32326	2	57580	uc002xtv.1	29473	ENSG00000124126	PREX1	phosphatidylinositol-3,4,5-trisphosphate dependent Rac exchange factor 1
chr20	47243775	47247751	3977	*	MACS_peak_13366	69.78	Exon (uc002xtv.1/57580, exon 19 of 23)	20	47240793	47273118	32326	2	57580	uc002xtv.1	25367	ENSG00000124126	PREX1	phosphatidylinositol-3,4,5-trisphosphate dependent Rac exchange factor 1
chr20	47279024	47281030	2007	*	MACS_peak_13367	85.45	Intron (uc002xtw.1/57580, intron 15 of 39)	20	47240793	47273118	32326	2	57580	uc002xtv.1	-5906	ENSG00000124126	PREX1	phosphatidylinositol-3,4,5-trisphosphate dependent Rac exchange factor 1
chr20	47306748	47308755	2008	*	MACS_peak_13368	108.4	Exon (uc002xtw.1/57580, exon 9 of 40)	20	47240793	47273118	32326	2	57580	uc002xtv.1	-33630	ENSG00000124126	PREX1	phosphatidylinositol-3,4,5-trisphosphate dependent Rac exchange factor 1
chr20	47318567	47320890	2324	*	MACS_peak_13369	385.93	Intron (uc002xtw.1/57580, intron 6 of 39)	20	47240793	47273118	32326	2	57580	uc002xtv.1	-45449	ENSG00000124126	PREX1	phosphatidylinositol-3,4,5-trisphosphate dependent Rac exchange factor 1
chr20	47325497	47328160	2664	*	MACS_peak_13370	164.57	Intron (uc002xtw.1/57580, intron 5 of 39)	20	47240793	47273118	32326	2	57580	uc002xtv.1	-52379	ENSG00000124126	PREX1	phosphatidylinositol-3,4,5-trisphosphate dependent Rac exchange factor 1
chr20	47335413	47339257	3845	*	MACS_peak_13371	73.44	Intron (uc002xtw.1/57580, intron 5 of 39)	20	47240793	47273118	32326	2	57580	uc002xtv.1	-62295	ENSG00000124126	PREX1	phosphatidylinositol-3,4,5-trisphosphate dependent Rac exchange factor 1
chr20	47376166	47377601	1436	*	MACS_peak_13372	175.29	Intron (uc002xtw.1/57580, intron 1 of 39)	20	47240793	47444420	203628	2	57580	uc002xtw.1	66819	ENSG00000124126	PREX1	phosphatidylinositol-3,4,5-trisphosphate dependent Rac exchange factor 1
chr21	27284053	27285049	997	*	MACS_peak_13905	59.46	Exon (uc011acg.2/351, exon 4 of 8)	21	27252861	27342862	90002	2	351	uc011acg.2	57813	ENSG00000142192	APP	amyloid beta precursor protein
chr21	27493057	27493757	701	*	MACS_peak_13906	140.46	Intron (uc010glk.3/351, intron 1 of 16)	21	27252861	27512708	259848	2	351	uc010glk.3	18951	ENSG00000142192	APP	amyloid beta precursor protein
chr21	27542092	27543850	1759	*	MACS_peak_13907	185.38	Promoter (<=1kb)	21	27252861	27543138	290278	2	351	uc002ylz.3	0	ENSG00000142192	APP	amyloid beta precursor protein
chr21	32869990	32870785	796	*	MACS_peak_13936	56.41	Intron (uc002yow.1/7074, intron 1 of 28)	21	32490736	32931290	440555	2	7074	uc002yow.1	60505	ENSG00000156299	TIAM1	T-cell lymphoma invasion and metastasis 1
chr21	32896720	32897656	937	*	MACS_peak_13937	53.49	Intron (uc002yow.1/7074, intron 1 of 28)	21	32490736	32931290	440555	2	7074	uc002yow.1	33634	ENSG00000156299	TIAM1	T-cell lymphoma invasion and metastasis 1
chr21	46674980	46676587	1608	*	MACS_peak_14180	56.47	Intron (uc002zgz.1/uc002zgz.1, intron 2 of 2)	21	46683843	46697325	13483	2	23275	uc002zha.3	20738	ENSG00000186866	POFUT2	protein O-fucosyltransferase 2
chr21	46871447	46873516	2070	*	MACS_peak_14186	117.33	Promoter (1-2kb)	21	46875424	46933634	58211	1	80781	uc002zhi.3	-1908	ENSG00000182871	COL18A1	collagen type XVIII alpha 1 chain
chr21	46878156	46880604	2449	*	MACS_peak_14187	57.57	Promoter (2-3kb)	21	46875424	46933634	58211	1	80781	uc002zhi.3	2732	ENSG00000182871	COL18A1	collagen type XVIII alpha 1 chain
chr21	46888994	46889981	988	*	MACS_peak_14188	71.91	Intron (uc002zhg.3/80781, intron 3 of 41)	21	46875424	46933634	58211	1	80781	uc002zhi.3	13570	ENSG00000182871	COL18A1	collagen type XVIII alpha 1 chain
chr21	46894047	46895412	1366	*	MACS_peak_14189	98.07	Exon (uc002zhg.3/80781, exon 5 of 42)	21	46875424	46933634	58211	1	80781	uc002zhi.3	18623	ENSG00000182871	COL18A1	collagen type XVIII alpha 1 chain
[truncated: 79 more rows]
