# Supplementary material for: MITF reprograms the extracellular matrix and focal adhesion in melanoma
Source: eLife. 2021 Jan 13;10:e63093. doi: 10.7554/eLife.63093 (PMC7857731; doi:10.7554/eLife.63093)
Supplement: Supplementary file 6. [file elife-63093-supp6.xlsx]

## Sheet: Sheet1
miRNA sequences used targeting the MITF
Name	mature miRNA sequence	pre-miRNA sequences
miR-NTC	AAATGTACTGCGCGTGGAGAC	F-5'-GAAATGTACTGCGCGTGGAGACGTTTTGGCCACTGACTGACGTCTCCACGCAGTACATTTCA-3'
		R-5'-AAATGTACTGCGTGGAGACGTCAGTCAGTGGCCAAAACGTCTCCACGCGCAGTACATTTCAG-3'
miR-MITF-X2	AAAGGTACTGCTTTACCTGCT	F- 5'-GAAAGGTACTGCTTTACCTGCTGTTTTGGCCACTGACTGACAGCAGGTAGCAGTACCTTTCA-3'
		R-5'-AAAGGTACTGCTACCTGCTGTCAGTCAGTGGCCAAAACAGCAGGTAAAGCAGTACCTTTCAG-3'
miR-MITF-X6	TAAGATGGTTCCCTTGTTCCA	F-5'-GTAAGATGGTTCCCTTGTTCCAGTTTTGGCCACTGACTGACTGGAACAAGAACCATCTTACA-3'
		R-5'-TAAGATGGTTCTTGTTCCAGTCAGTCAGTGGCCAAAACTGGAACAAGGGAACCATCTTACAG-3'

## Sheet: Sheet2
Primers used for generating MITF overexpression lines using piggybac transposon system
Primer name	Sequence (5'-3')
MITF-FLAG-F	taattgaattcCGGTACCAGTCGACTCTAGA
FLAG-F	taattgaattcCCACCAATGGACTACAAAGACCATGACG
FLAG-R	taattactagtCTTGTCATCGTCATCCTTGT

## Sheet: Sheet3
Primers used for RT-qPCR
Target	Primer name	Sequence (5'-3')
β-Actin	b-Actin publ-F	AGGCACCAGGGCGTGAT
	b-Actin publ-R	GCCCACATAGGAATCCTTCTGAC
HumanRPLP0	hARP-F	CACCATTGAAATCCTGAGTGATGT
	hARP-R	TGACCAGCCCAAAGGAGAAG
MLANA	Mlana-F	TGGATACAGAGCCTTGATGGATAA
	Mlana-R	GAGACACTTTGCTGTCCCGA
MMP15	MMP15-F	CCCCTATGACCGCATTGACA
	MMP15-R	CGCCAGTACCTGTCCTCTTG
MITF	cMITF-F	ATGGAAACCAAGGTCTGCCC
	cMITF-R	GGGAAAAATACACGCTGTGAGC
CDH2	CDH2-F	TGCAAGACTGGATTTCCTGAAGA
	CDH2-R	TGCAGTTGCTAAACTTCACATTG
CDH1	CDH1-F	AGAAAATAACGTTCTCCAGTTGCT
	CDH1-R	TATGGGGGCGTTGTCATTCA
TGFB1	TGFB1-F	GGAAATTGAGGGCTTTCGCC
	TGFB1-R	AGTGAACCCGTTGATGTCCA
ITGA2	ITGA2-F	CTCGGGCAAATTATACCGGC
	ITGA2-R	GAGCCAATCTGGTCACCTCG
NGFR	NGFR-F	TGTCTATTGCTCCATCCTGGC
	NGFR-R	CTGTTCCACCTCTTGAAGGC
SERPINA3	SERPINA3-F	AAGGACCTTGACTCGCAGAC
	SERPINA3-R	GGCATCTCCCATTTGGCTTT
