# Supplementary figures and images for: MITF reprograms the extracellular matrix and focal adhesion in melanoma
Source: eLife journal article supplement (doi:10.7554/elife.63093), 2021-01-13

Figure 1-figure supplement 1

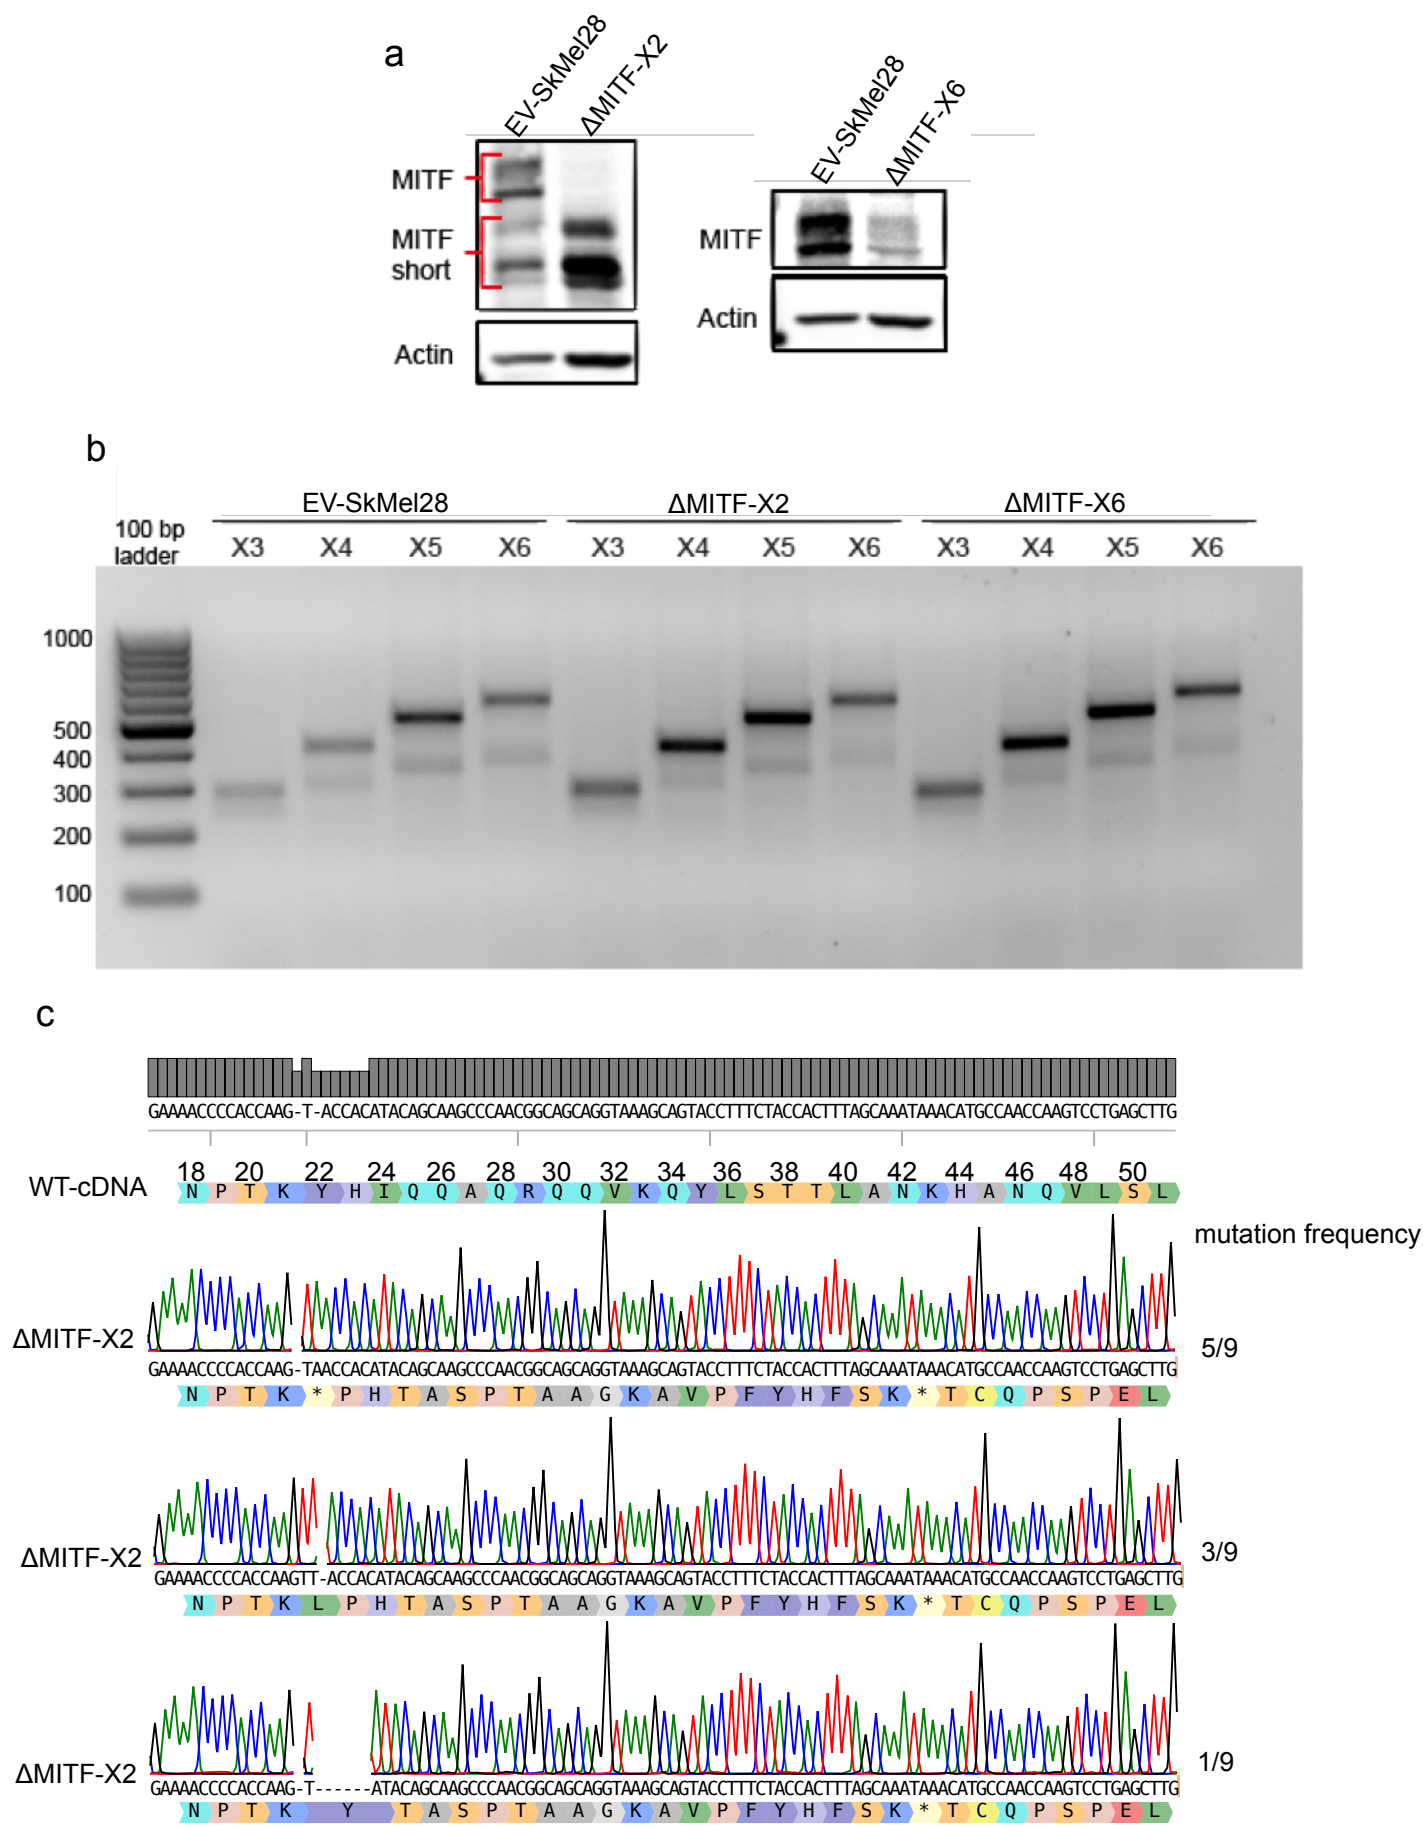

Supplement: supp [file elife-63093-supp-v1.zip]

Figure2-figure supplement 1

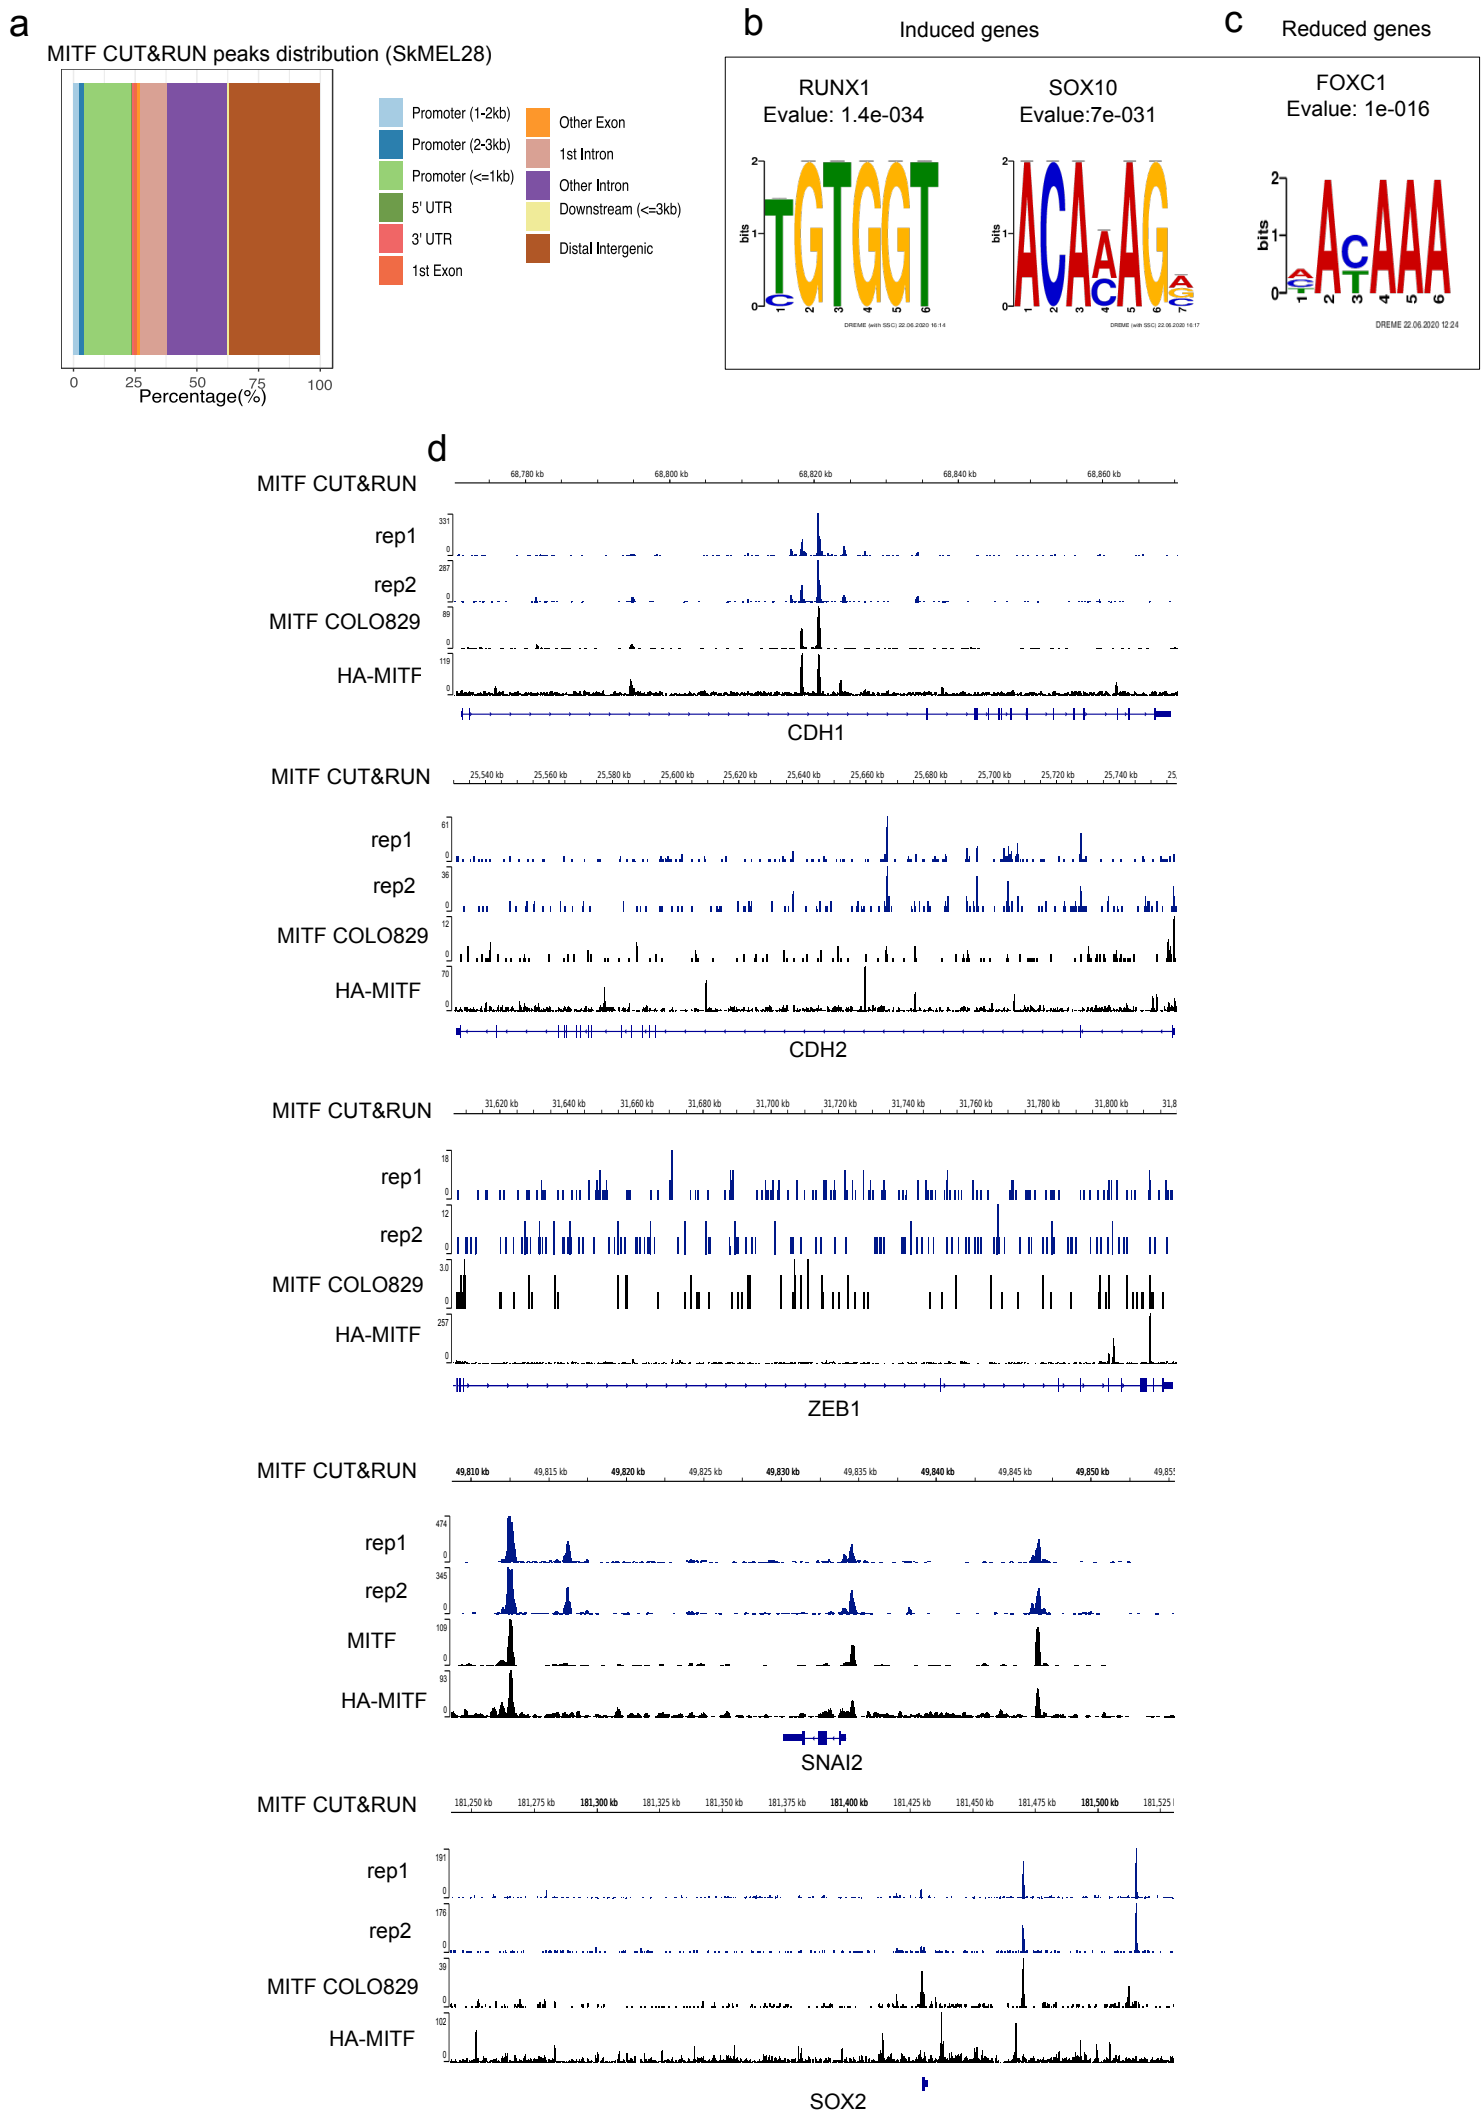

Supplement: supp [file elife-63093-supp-v1.zip]

Figure 6-figure supplement 2

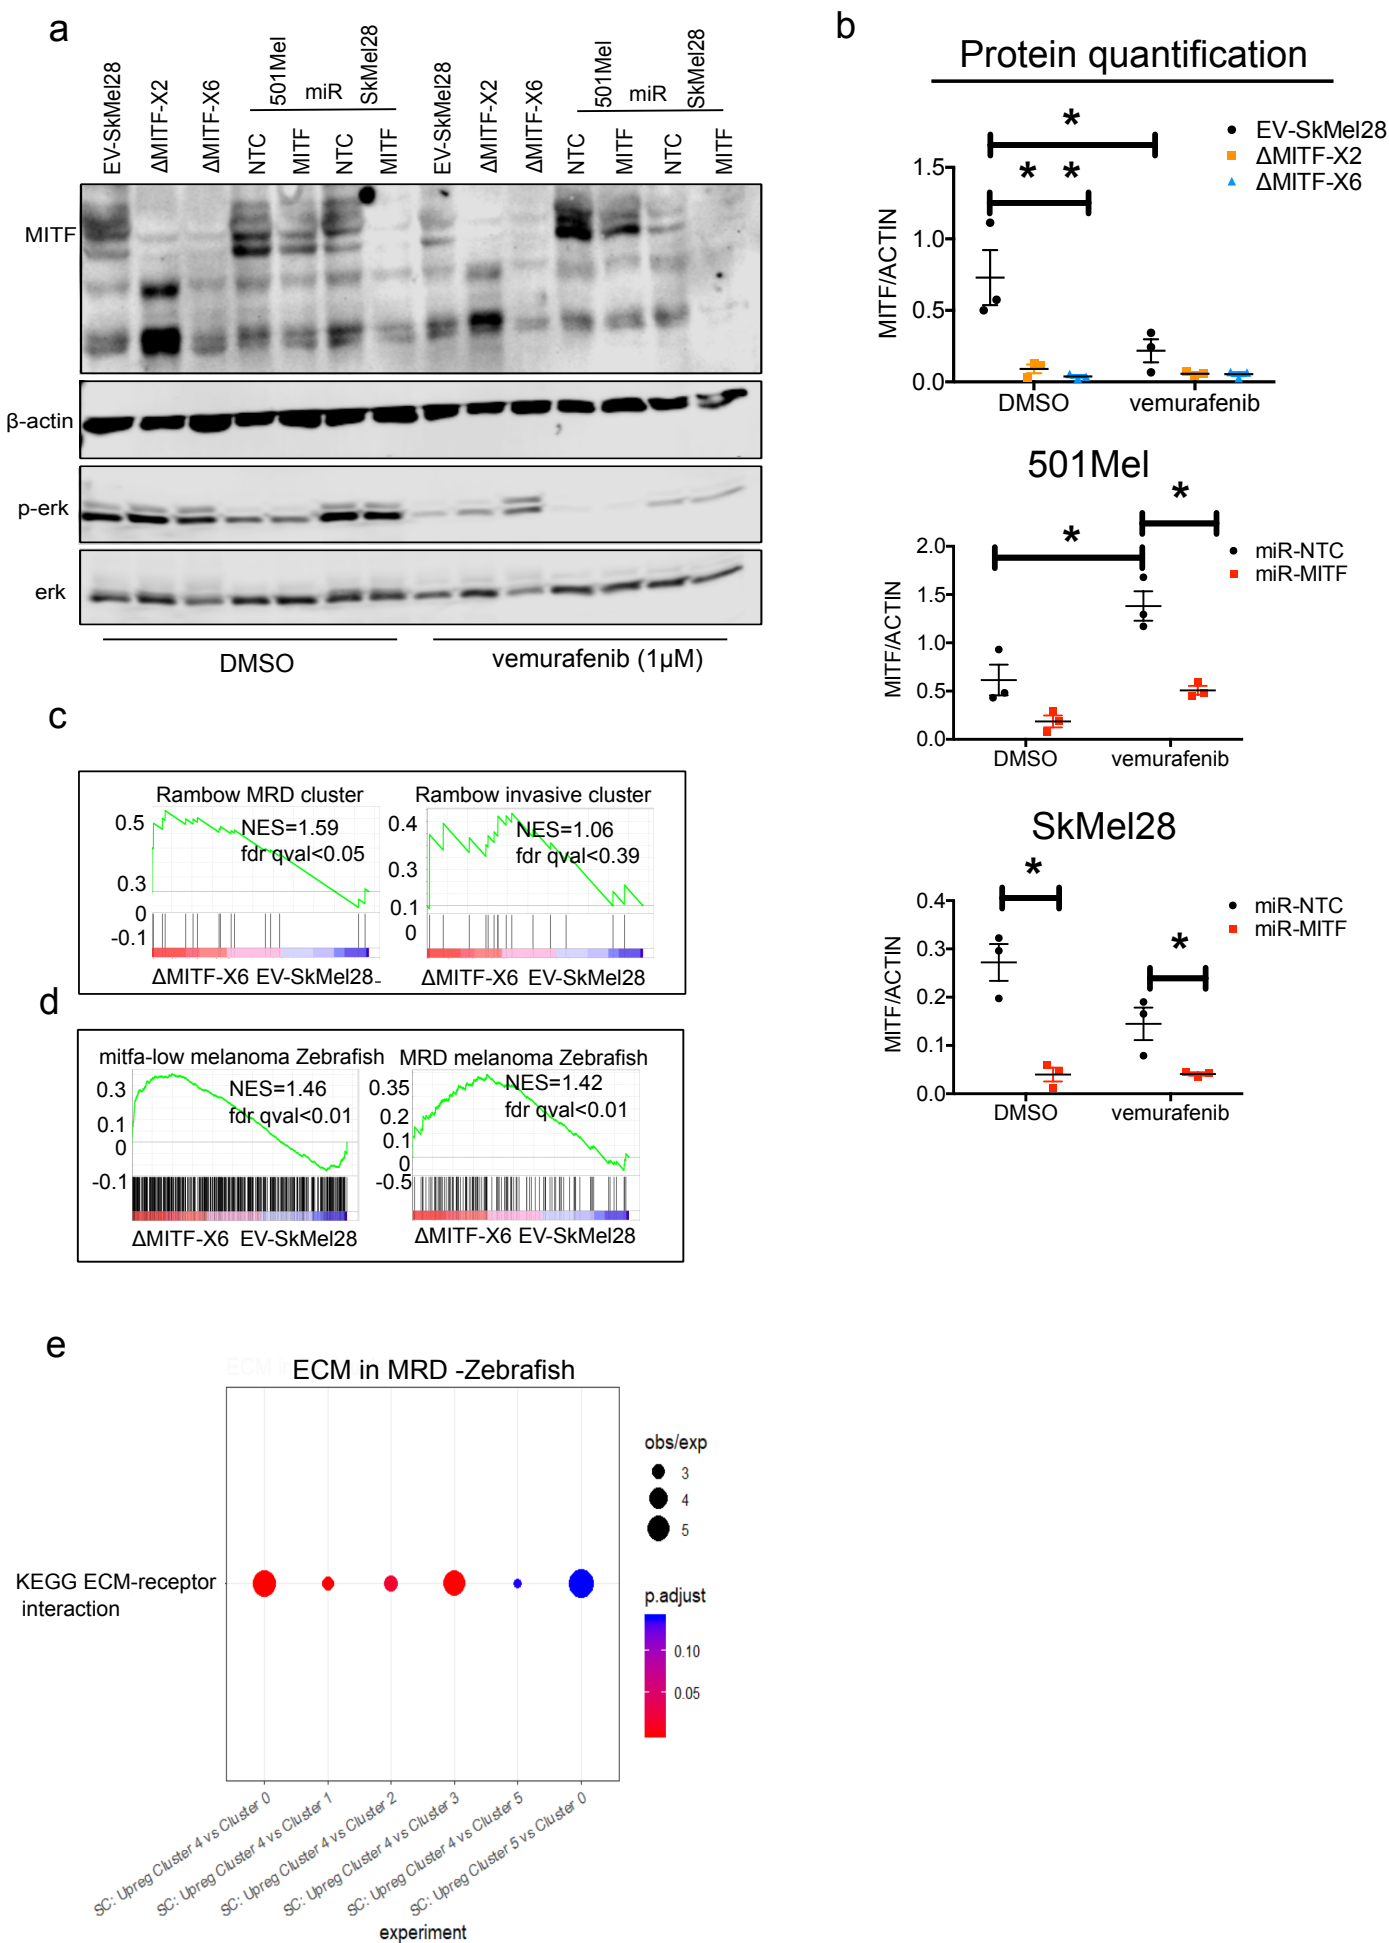

Supplement: supp [file elife-63093-supp-v1.zip]

Figure 6-figure supplement 1

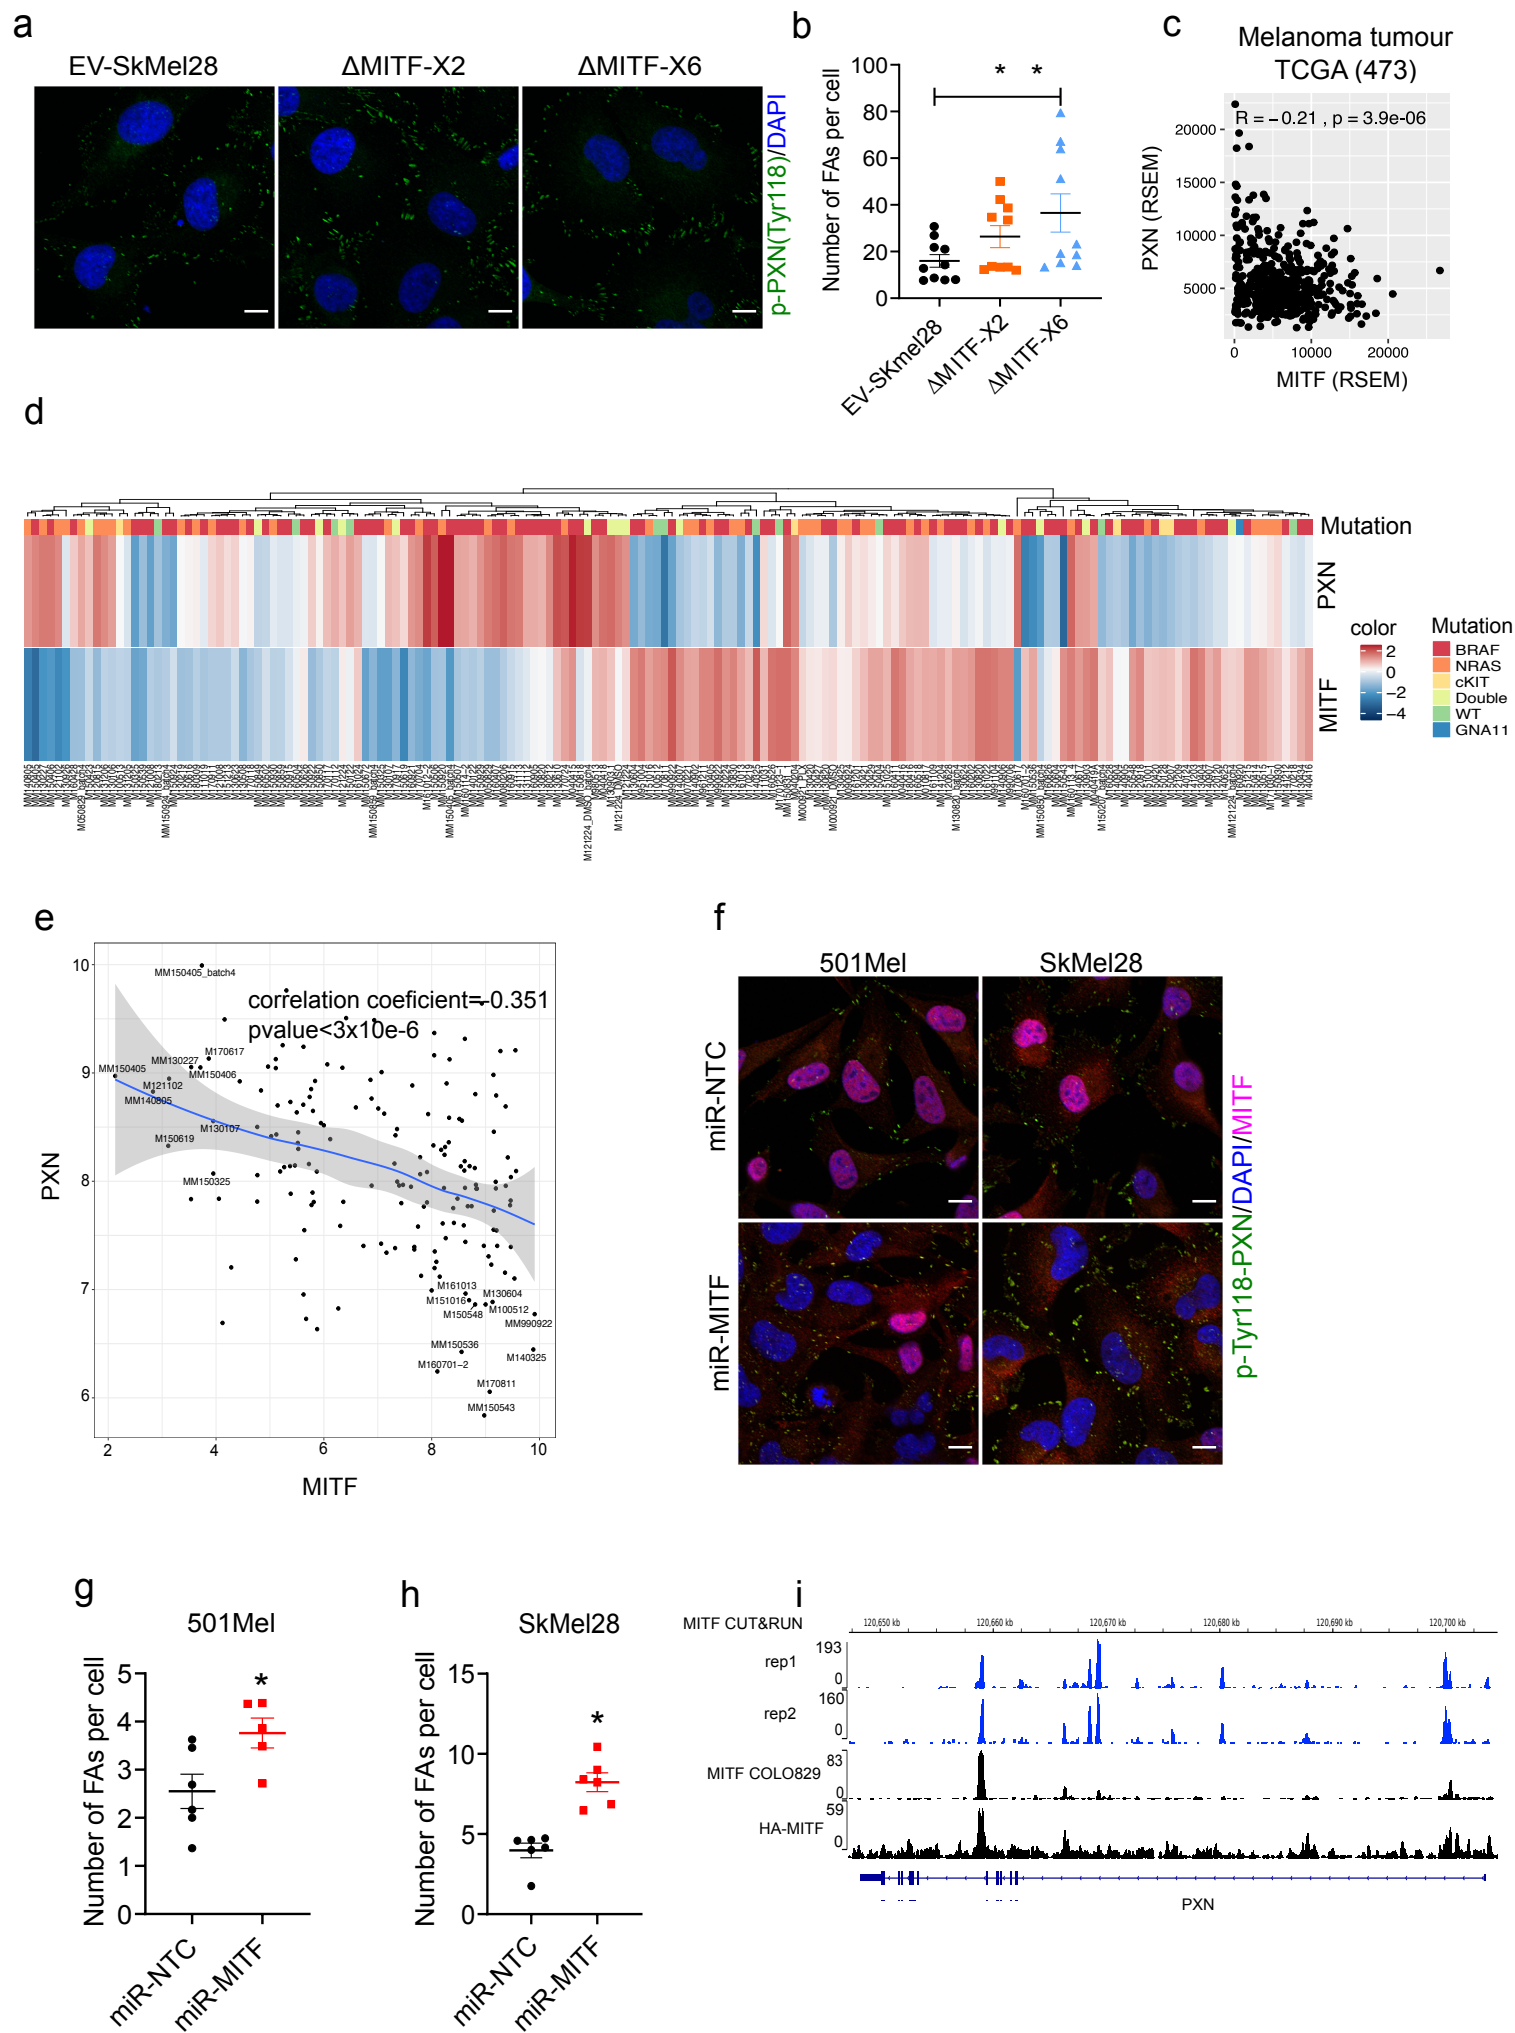

Supplement: supp [file elife-63093-supp-v1.zip]

Figure 2-figure supplement 2

RT-qPCR

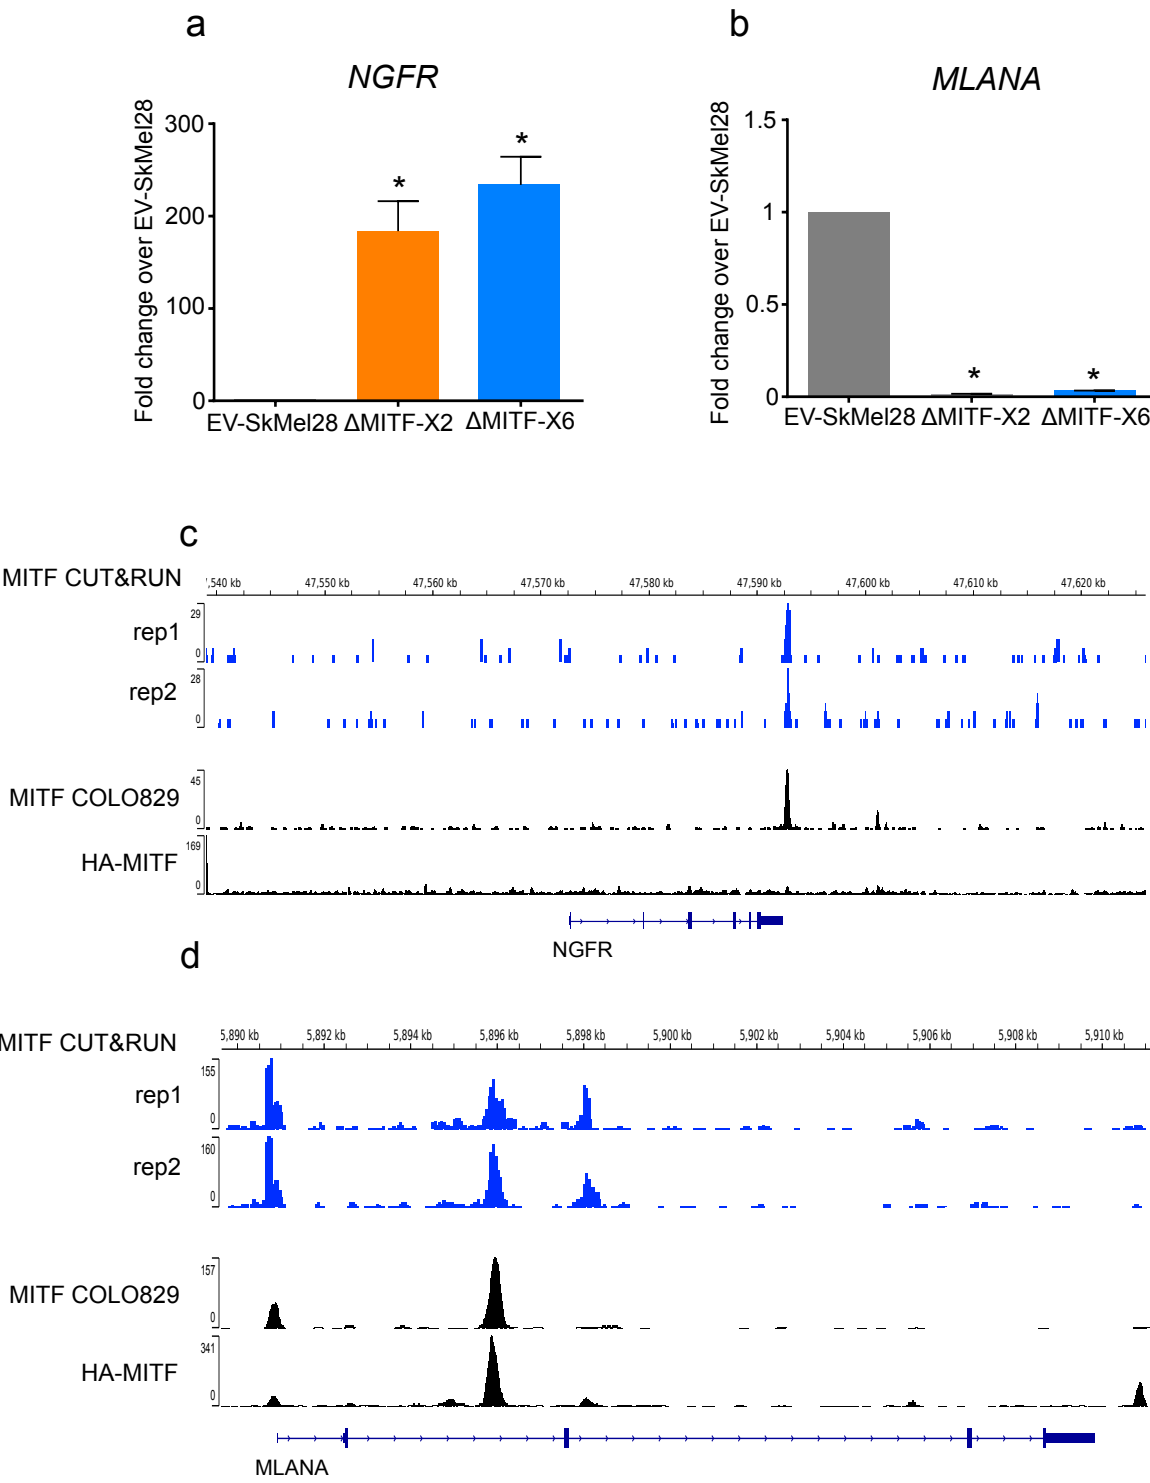

Supplement: supp [file elife-63093-supp-v1.zip]
